# Supplementary material for: RNA Sequencing Reveals Xyr1 as a Transcription Factor Regulating Gene Expression beyond Carbohydrate Metabolism
Source: Hindawi journal article supplement (doi:10.1155/2016/4841756), 2016-01-01
Supplement: f1 [file 4841756.f1.zip]

Archive with 14 entries (13 files):
- addition files/
- addition files/Supplementary figures.docx
- addition files/Table S1.docx
- addition files/Table S10. Rut-30 (glucose)-and-Rut-C30 (lignocellulose)-DE.tbl-carbohydrate metabolism genes.xlsx
- addition files/Table S11. Δxyr1-Rut-C30_lignocellulose-DE transporters.xlsx
- addition files/Table S12. Rut-30 (glucose)-and-Rut-C30 (lignocellulose)-DE.tbl-transporter genes.xlsx
- addition files/Table S2.xlsx
- addition files/Table S3.docx
- addition files/Table S4. Δxyr1-and-Rut-C30-DE under lignocellulose conditon.tbl-Funcation.xlsx
- addition files/Table S5. Rut-30-and-Δxyr1_Glucose-DE.tbl-Funcation.xlsx
- addition files/Table S6. intersection of Δxyr1 (lignocellulose)-Rut-C30 (lignocellulose) and Δxyr1 (glucose)-Rut-30 (glucose).xlsx
- addition files/Table S7. Rut-C30 (glucose)-and-Rut-C30 (lignocellulose)-DE.tbl-Funcation.xlsx
- addition files/Table S8. intersection Δxyr1 (lignocellulose)-Rut-C30 (lignocellulose) and Rut-C30 (lignocellulose)-Rut-30 (glucose).xlsx
- addition files/Table S9. Δxyr1 (lignocellulose)-and-Δxyr1 (glucose)-DE.tbl-Funcation.xlsx
