# Supplementary material for: RNA Sequencing Reveals Xyr1 as a Transcription Factor Regulating Gene Expression beyond Carbohydrate Metabolism
Source: Hindawi journal article supplement (doi:10.1155/2016/4841756), 2016-01-01
Supplement: f1 [file 4841756.f1.zip › addition files/Supplementary figures.docx]

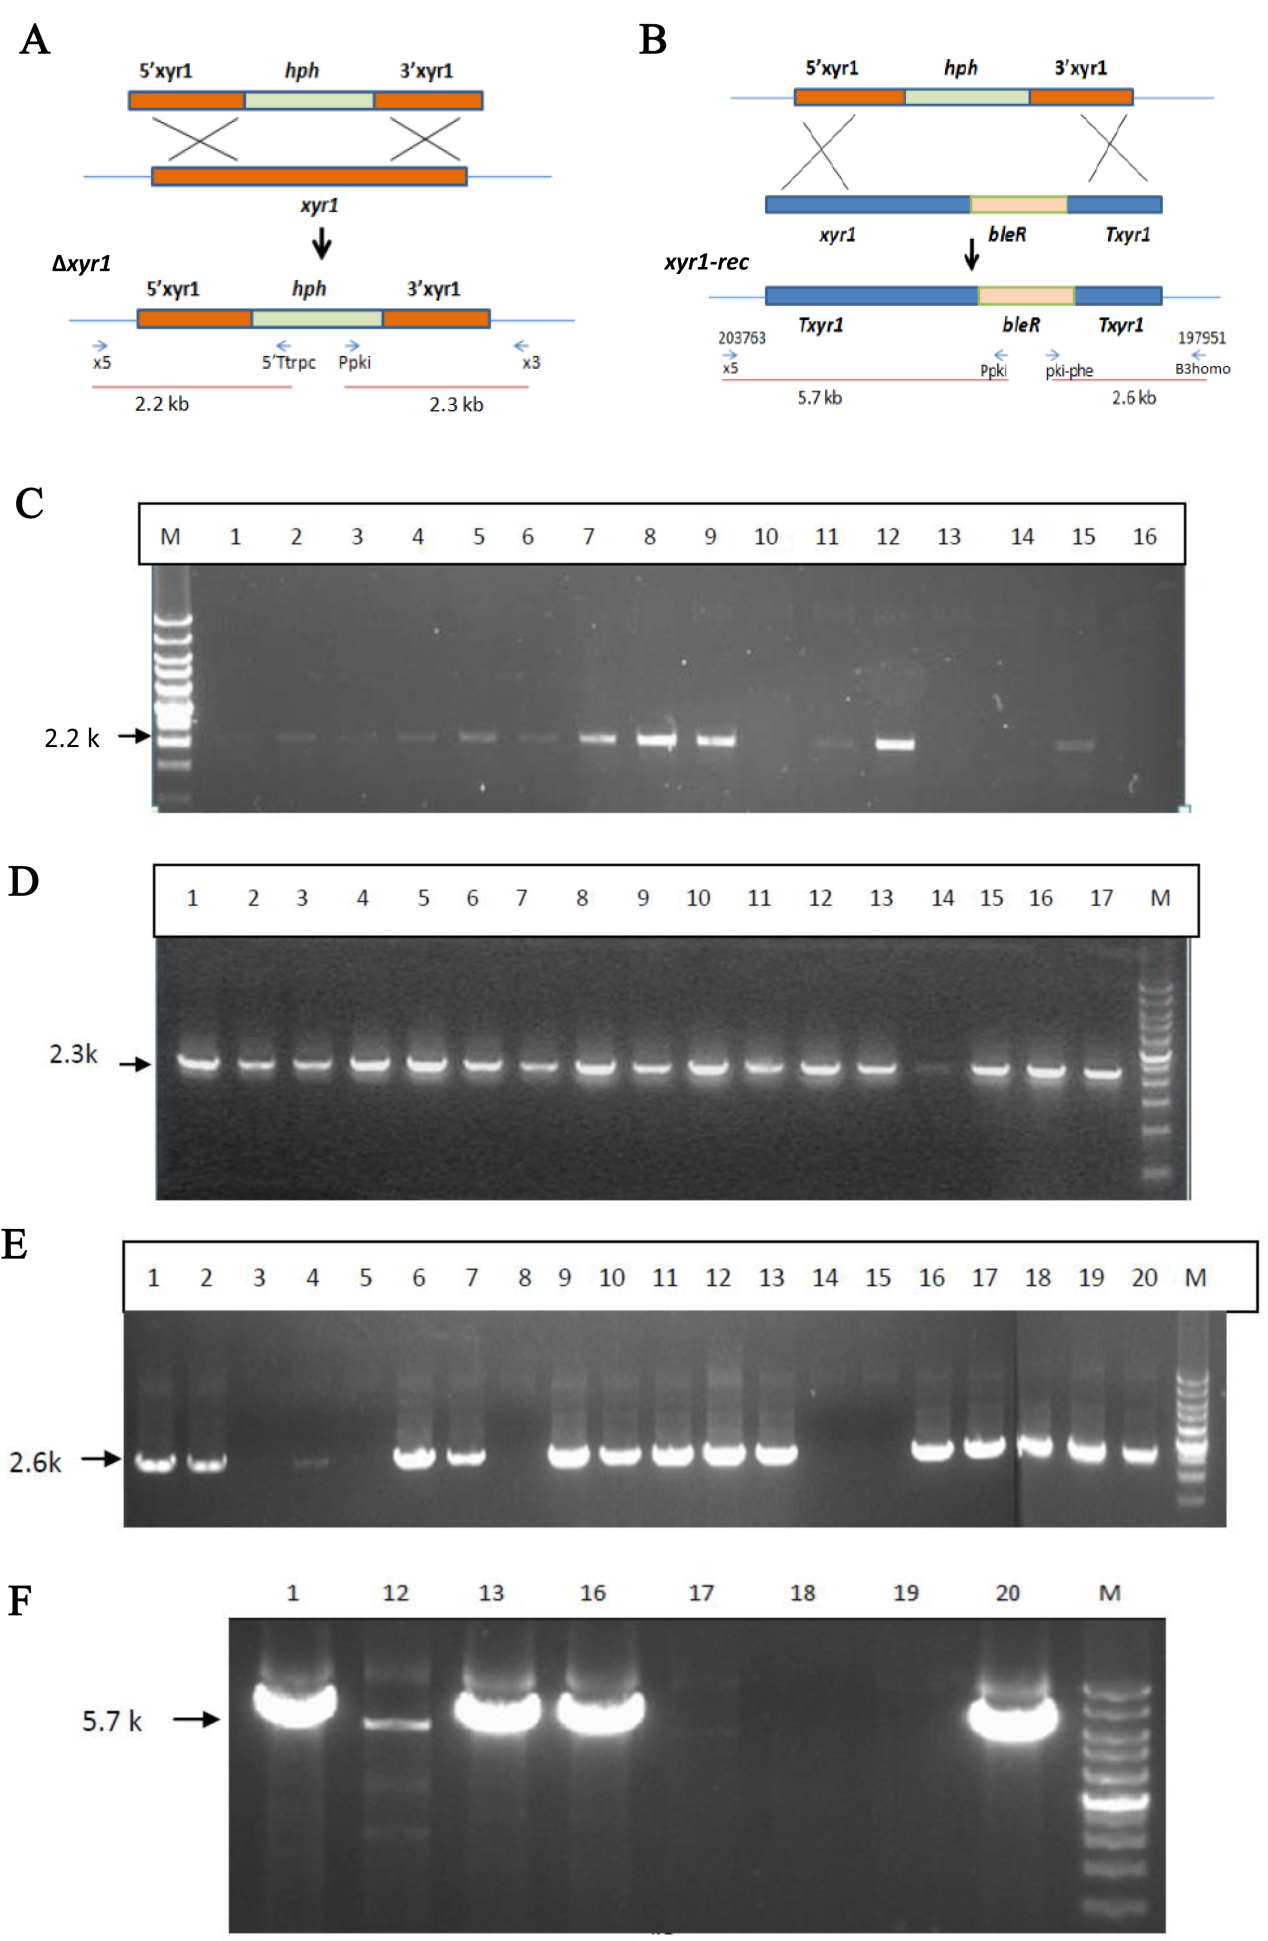


Fig. S1. Construction and verification of the *xyr1* deletion and *xyr1* re-complementation mutant strains of *T. reesei* Rut-C30. (A-B) Schematic representation of knockout(A), re-complementation of *xyr1* (B) and verification of homologous recombination. (C-D) Verification of the homologous recombination of the 5’ terminal (C) and the 3’ terminal (D) of the *xyr1* knockout strain. The 8# strain was selected as the *xyr1* deletion mutant, Δ*xyr1*. (E-F) Verification of the 5’ terminal (E) and the 3’ terminal (F) homologous insertion of *xyr1*. The 1# strain was selected as the *xyr1* re-complementation strain, *xyr1-rec*. M, marker.


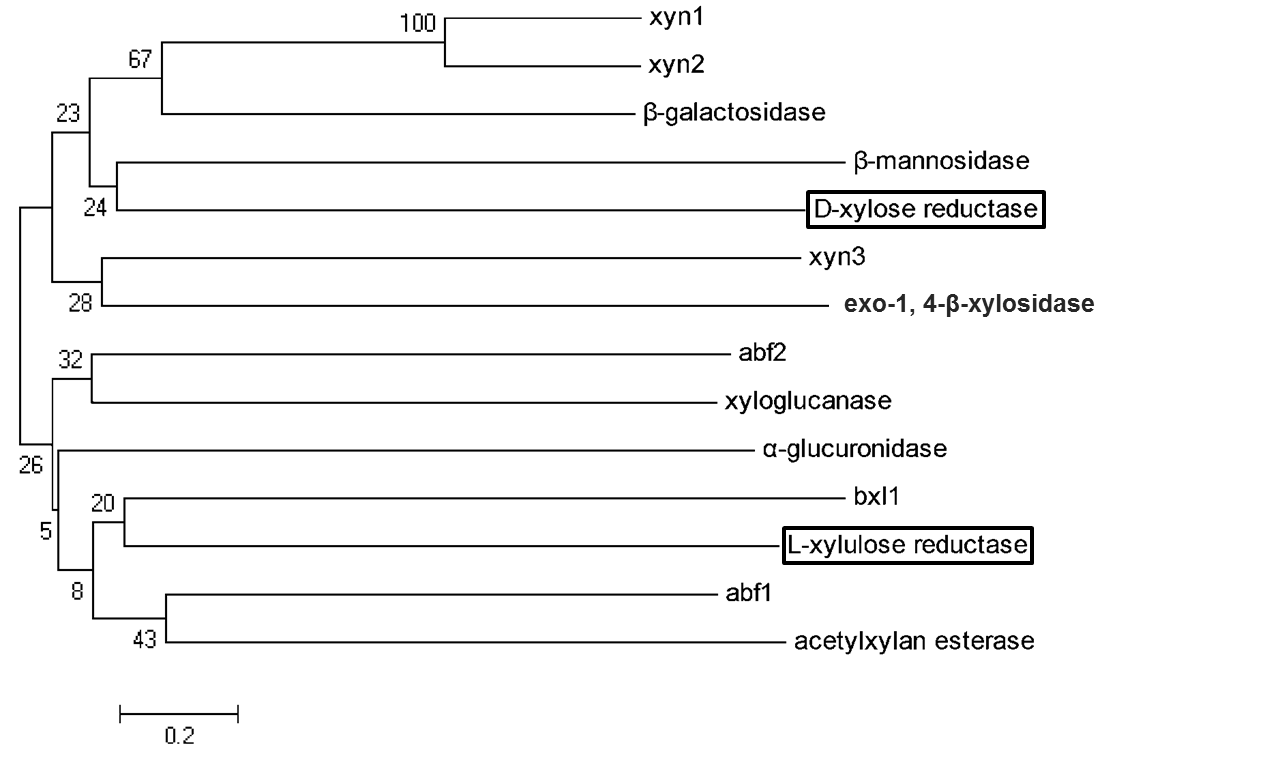


Fig. S2. The phylogenetic tree was inferred using the neighbor-joining method. Evolutionary analyses were conducted in MEGA5. The genes hired for constructing the phylogenetic tree were *xyn1* (TrireRUTC30: 38418), *xyn2* (TrireRUTC30: 124931), *xyn3* (TrireRUTC30: 23616), *bxl1* (TrireRUTC30: 77521), exo-1,4-β-xylosidase (TrireRUTC30: 140746), *abf1* (TrireRUTC30: 102517), *abf2* (TrireRUTC30: 118070), β-galactosidase (TrireRUTC30: 101346), β-mannosidase (TrireRUTC30: 67432), acetylxylan esterase (TrireRUTC30: 88887), α-glucuronidase (TrireRUTC30: 90302), xyloglucanase (TrireRUTC30: 111943), D-xylose reductase (TrireRUTC30: 94809), and L-xylulose reductase (TrireRUTC30: 121678), all detected down-regulated in Δ*xyr1* strain under the lignocellulose condition. The two genes involved in xylose-metabolizing were highlighted by black boxes. The scale bar indicates the branch length.


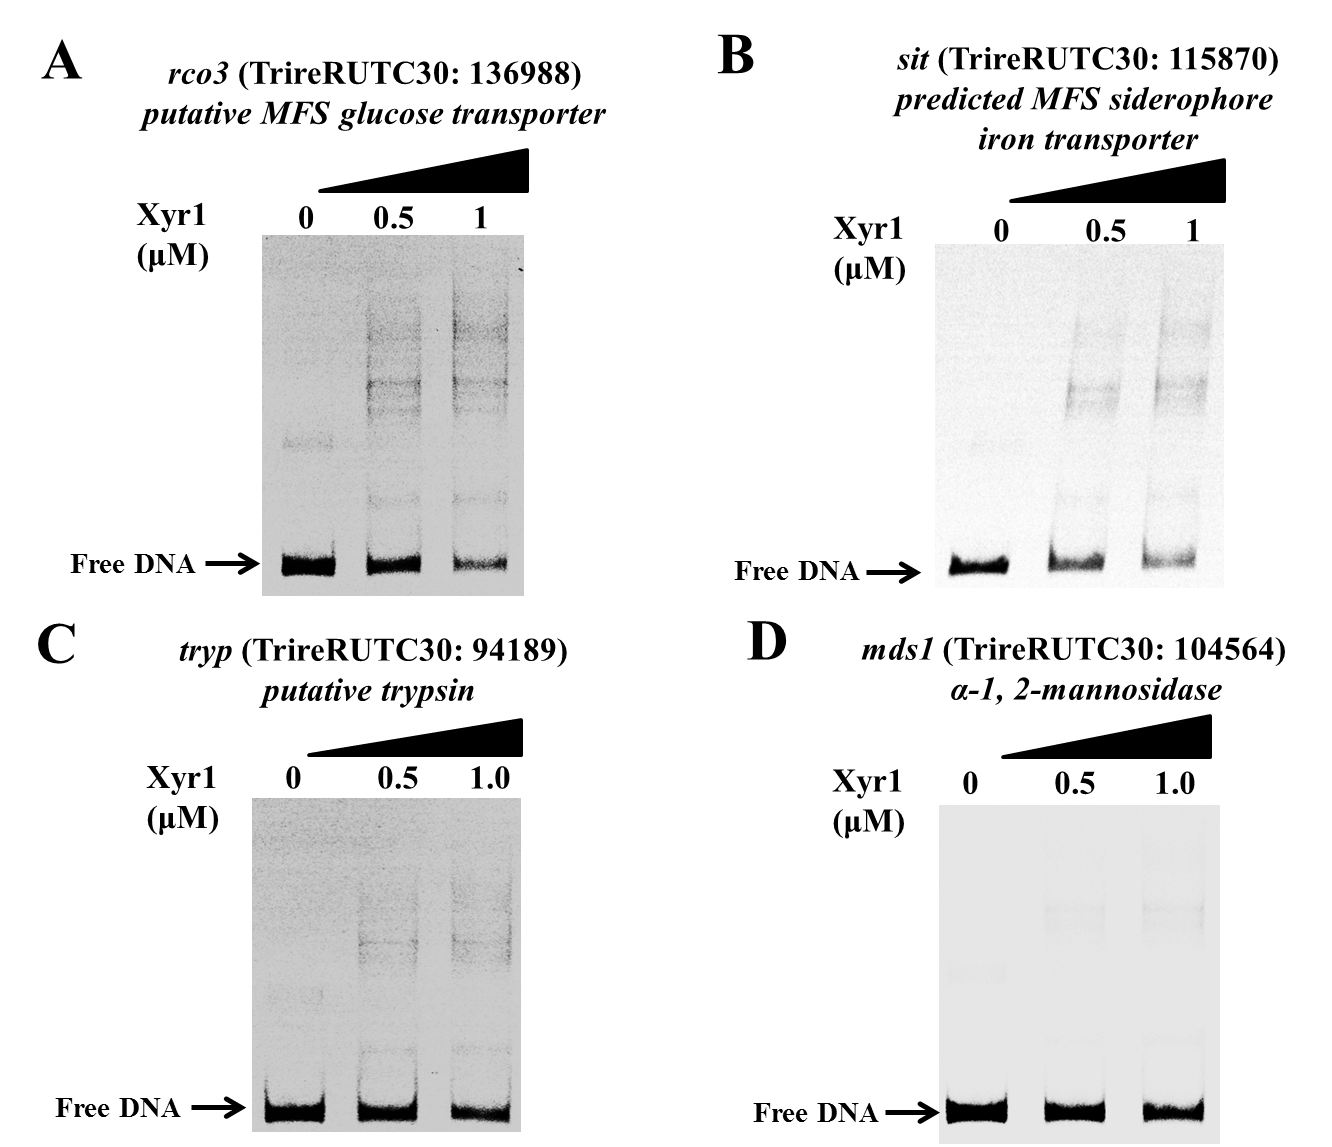


Fig. S3. DNA binding of Xyr1 to the upstream regions of four up-regulated genes in Δ*xyr1* under inducing condition. No interaction was observed between Xyr1 and the promoters of the putative trypsin, the α-1, 2-mannosidase, the putative MFS gulcose transporter and the predicted MFS siderophore iron transporter encoding genes *tryp* (A), *mds1* (B), *rco3* (C) and *sit* (D), respectively. The amounts of purified Xyr1 (μM) used were as indicated and about 10 ng of Cy5-labeled probe was added to each reaction.
