# Supplementary material for: RNA Sequencing Reveals Xyr1 as a Transcription Factor Regulating Gene Expression beyond Carbohydrate Metabolism
Source: Hindawi journal article supplement (doi:10.1155/2016/4841756), 2016-01-01
Supplement: f1 [file 4841756.f1.zip › addition files/Table S1.docx]

**Table S1. Primers used in this study.**

| **Primer** | **Sequence (5’ to 3’)** |
| --- | --- |
| **primers used for PCR amplification** | |
| HygxhoI | CCGCTCGAGCAGGGCTGGTGACGGAATT |
| Orfhyg | GTACCTTATCGCGAAGCCGGAAGAACCCTCTTAACCATGAAAAAGCCTGAACTCACC |
| Ppki | CATGGTTAAGAGGGTTCTTC |
| Bampki | GGGATCCGCACGAGATAACGGTGAGACT |
| xyr1xhf | CCGCTCGAGCGCAAGACGGAAACACCT |
| xyr1xhr | CCGCTCGAGCCTGGCGCTGCTTTGGCT |
| xyr1bam | CGGGATCCGATTGGGACGAGCAGGTT |
| xyr1sal | ACGCGTCGACCATTCTTGTCCTCGCTCT |
| X5 | GACCACTCCGTTTCTCGT |
| TtrpC | AGTAGATGCCGACCGGAT |
| X3 | TTCCCACCTTCGTTGCTC |
| X3BamH | GAGGATCCATTCTTGTCCTCGCTCT |
| X5BamH | CGGGATCCCGTCCTGTCTGGGGTAAG |
| Txyr5Xho | CCCTCGAGGGTTCCTTCCTCCTCCTG |
| Txyr3Xho | CCCTCGAGGGTACTCCCGTAAGTGGG |
| B3homo | AAGTCTCAGATGCAGGCA |
| pki-phe | ATGGCCAAGTTGACCAGT |

| **Primers used in RT-PCR** | | **Discription** |
| --- | --- | --- |
| RT-gpdF | AAGTCCAAGGCGAAGCTGA | forward primer for *gpd* (TrireRUTC30: 127810) |
| RT-gpdR | CCAGGGCCACAATGTTCTT | reverse primer for *gpd* (TrireRUTC30: 127810) |
| RT-xyr1F | CCATCAACCTTCTAGACGAC | forward primer for *xyr1* (TrireRUTC30: 98788) |
| RT-xyr1R | AACCCTGCAGGAGATAGAC | reverse primer for *xyr1* (TrireRUTC30: 98788) |
| RT-cbh2F | CCAACAAGAATGGCGGTAA | forward primer for *cbh2* (TrireRUTC30: 122470) |
| RT-cbh2R | CAATTTGACGAATGGTGTCG | reverse primer for *cbh2* (TrireRUTC30: 122470) |
| RT-eg1F | AACCAGTACATGCCCAGCA | forward primer for *eg1* (TrireRUTC30: 5304) |
| RT-eg1R | GTTCTCTCCACACGGCAGA | reverse primer for *eg1* (TrireRUTC30: 5304) |
| RT-bgl2F | CACGGCTCCAACGACTTT | forward primer for *bgl2* (TrireRUTC30: 127115) |
| RT-bgl2R | TGCTTGTTGGTGAAGAGC | reverse primer for *bgl2* (TrireRUTC30: 127115) |
| RT-swoF | GCAGGGCAATGGATCACT | forward primer for *swo* (TrireRUTC30: 104220) |
| RT-swoR | TGACTGCCGTGAGAGCAA | reverse primer for *swo* (TrireRUTC30: 104220) |
| RT-chitF | CCACCGACAGCAACAAGA | forward primer for *chit* (TrireRUTC30: 94061) |
| RT-chitR | CGCACGGGTTGTTGTAGA | reverse primer for *chit* (TrireRUTC30: 94061) |
| RT-gtF | TTCATCGGCCAGATCGTT | forward primer for *gt* (TrireRUTC30: 97259) |
| RT-gtR | CAGGCAGCATGAAGACGA | reverse primer for *gt* (TrireRUTC30: 97259) |
| RT-lpF | GATGGGAGGCCGCTTTAT | forward primer for *lp* (TrireRUTC30: 127980) |
| RT-lpR | GCTGGGCACGATATTTGG | reverse primer for *lp* (TrireRUTC30: 127980) |
| RT-trypF | GGGCTCAGTGTCACCAACA | forward primer for *trypsin* (TrireRUTC30: 94189) |
| RT-trypR | AAACGACACCCTGGAGGA | reverse primer for *trypsin* (TrireRUTC30: 94189) |
| RT-enchitF | ACCTCAACCGGGACATCA | forward primer for *enchit* (TrireRUTC30: 33168) |
| RT-enchitR | GACCCTTCTTGCCGAGGTA | reverse primer for *enchi*t (TrireRUTC30: 33168) |
| RT-eg4F | CCGACGCATACCAAAACC | forward primer for *eg4* (TrireRUTC30: 139633) |
| RT-eg4R | AACTGGCACCCACTGGAA | reverse primer for *eg4* (TrireRUTC30: 139633) |
| RT-qpF | GGCAAGCAGAGTGAAGCTG | forward primer for *qp* (TrireRUTC30: 138519) |
| RT-qpR | CTTCGTCTTCGCGGTTGT | reverse primer for *qp* (TrireRUTC30: 138519) |
| RT-ptrF | TGGGTCGGTCTCGTCATT | forward primer for *ptr* (TrireRUTC30: 138633) |
| RT-ptrR | TCAGGGGAGCAATGTTGG | reverse primer for *ptr* (TrireRUTC30: 138633) |
| RT-nmrAF | GCCCAACATCTCGCACTT | forward primer for *nmrA* (TrireRUTC30: 121828) |
| RT-nmrAR | GCGAATCATGGTCGTGAA | reverse primer for *nmrA* (TrireRUTC30: 121828) |
| **Primers used in EMSAs** | | | |
| Cy5-labeled primer | **[Cy5]-ACTAACTCGCGTACTG** | | |
| EM-bgl2-F | **ACTAACTCGCGTACTG**GACAAGGACACATAAGCC | | |
| EM-bgl2-R | **ACTAACTCGCGTACTG**GCTCAACTGTGTGCAGAT | | |
| EM-LP-F | **ACTAACTCGCGTACTG**GTATCATGCATTTGGGCT | | |
| EM-LP-R | **ACTAACTCGCGTACTG**CAATCAGGTGATCGGTT | | |
| EM-cip1-F | **ACTAACTCGCGTACTG**GAGAATGTAGGTTCTGAG | | |
| EM-cip1-R | **ACTAACTCGCGTACTG**ATTGCGTCTTCATCCTTC | | |
| EM-nmrA-F | **ACTAACTCGCGTACTG**GATGTGATCCTCGAGACCAC | | |
| EM-nmrA-R | **ACTAACTCGCGTACTG**TGCGTAGCCAGCACATCTTTC | | |
| EM-endoT-F | **ACTAACTCGCGTACTG**CGGGCAAGCAAACCGTCGC | | |
| EM-endoT-R | **ACTAACTCGCGTACTG**AGGACGAGGCCGGTTTATGC | | |
| EM-pepA-F | **ACTAACTCGCGTACTG**GAGTTGTCTCAGAAGAAAG | | |
| EM-pepA-R | **ACTAACTCGCGTACTG**TACACGATGGCGGAAGGCCC | | |
| EM-tryp-F | **ACTAACTCGCGTACTG**GAGATAGCAGATGGATTTGG | | |
| EM-tryp-R | **ACTAACTCGCGTACTG**AGACCGAGGCTCACAGAGTG | | |
| EM-mds1-P1-F | **ACTAACTCGCGTACTG**TTCTCATTCTCCTGGCTCTG | | |
| EM-mds1-P1-R | **ACTAACTCGCGTACTG**GTTGGCAGCAGCTGTAGTTC | | |
| EM-mds1-P2-F | **ACTAACTCGCGTACTG**GTGCAATGTTCGATTCCAGTC | | |
| EM-mds1-P2-R | **ACTAACTCGCGTACTG**TCCAGTAGCTTCAGGGGTGG | | |
| EM-mds1-P3-F | **ACTAACTCGCGTACTG**ATATCATTGCACGTAAAGCC | | |
| EM-mds1-P3-R | **ACTAACTCGCGTACTG**ATAGCGGCGTGAAGAAGCAAC | | |
| EM-rco3-F | **ACTAACTCGCGTACTG**CGCAGCTTGCTGGCCCCAAC | | |
| EM-rco3-R | **ACTAACTCGCGTACTG**CCGGCAAGAGATTGAGGTGC | | |
| EM-sit-F | **ACTAACTCGCGTACTG**CCGTCGGGCCACTGACAAGAG | | |
| EM-sit-R | **ACTAACTCGCGTACTG**CTCTTCGTTTTCCTACTCATG | | |
| EM- hsp23-F | **ACTAACTCGCGTACTG**TTCGGGAGCAGCGTCATGCAG | | |
| EM- hsp23-R | **ACTAACTCGCGTACTG**TGGTAGAGTGTGTGGTTTGAG | | |
