# Supplementary material for: RNA Sequencing Reveals Xyr1 as a Transcription Factor Regulating Gene Expression beyond Carbohydrate Metabolism
Source: Hindawi journal article supplement (doi:10.1155/2016/4841756), 2016-01-01
Supplement: f1 [file 4841756.f1.zip › addition files/Table S2.xlsx]

## Sheet: Sheet1
		Table S2. Sequencing statistics of RNA-seq in this study.
		sample	raw reads	raw base	clean reads	clean base	filter percentage	Accession no.
		G30a	66301472	6630147200	44951492	4495149200	0.677986	SRX328999
		C30-1b	99649914	9964991400	65588178	6558817800	0.658186	SRX328996
		C30-2c	66570586	6657058600	45814462	4581446200	0.688209	SRX328997
		CΔxyr1d	53543616	5354361600	35751674	3575167400	0.667711	SRX328998
		GΔxyr1e	60558952	6055895200	41165514	4116551400	0.679759	SRX329000
		a the parental strain Rut-C30 under glucose condition.
		b the parental strain Rut-C30 induced under lignocellulose conditon (one biological replicate).
		c the parental strain Rut-C30 induced under lignocellulose conditon (the other biological replicate).
		d the xyr1 deletion strain Δxyr1 induced under lignocellulose conditon.
		e the xyr1 deletion strain Δxyr1 under glucose condition.
