# Supplementary material for: RNA Sequencing Reveals Xyr1 as a Transcription Factor Regulating Gene Expression beyond Carbohydrate Metabolism
Source: Hindawi journal article supplement (doi:10.1155/2016/4841756), 2016-01-01
Supplement: f1 [file 4841756.f1.zip › addition files/Table S3.docx]

**Table S3. qRT-PCR verification of the transcription levels of 13 genes differently expressed between the parental strain Rut-C30 and its *xyr1* deletion strain under two culture conditions**

| **Gene ID** | **Gene name** | **Gene product** | **lg2 fold change (C30a/** **CΔ*xyr1*b)** | **lg2 fold change (C30/CΔ*xyr1*)** |
| --- | --- | --- | --- | --- |
| **RNA-seqc** | **qRT-PCRd** |
| TrireRUTC30: 122470 | *cbh2* | Exoglucanase 2 | 10.7 | 13.5 |
| TrireRUTC30: 5304 | *eg1* | Endoglucanase 1 | 10.4 | 10.9 |
| TrireRUTC30: 127115 | *bgl2* | Beta-glucosidase 2 | 1.84 | 3.49 |
| TrireRUTC30: 139633 | *eg4* | Endoglucanase 4 | 10.16 | 11.81 |
| TrireRUTC30: 104220 | *swo* | Swollenin | 8.73 | 11.54 |
| TrireRUTC30: 97259 | *gt* | Predicted glucose transporter | 6.24 | 5.73 |
| TrireRUTC30: 127980 | *lp* | Predicted lactose permease | 5.68 | 6.26 |
| TrireRUTC30: 94061 | *chit* | chitinase | -1.58 | -0.27 |
| TrireRUTC30: 33168 | *enchit* | Endochitinase | -1.72 | -2.19 |
| TrireRUTC30: 104564 | *pepA* | Putative acid aspergillopepsin I | -1.24 | -5.53 |
| TrireRUTC30: 94189 | *tryp* | Trypsin | -3.55 | -9.5 |
| TrireRUTC30: 87029 | *atg1* | Serine/threonine-protein kinase | -1.17 | -5.41 |
| TrireRUTC30: 26479 | *adh* | Alcohol dehydrogenase | -1.53 | -16.66 |
| TrireRUTC30: 122251 | *hsp23* | Heat shock protein | -1.64 | -7.66 |
| **Gene ID** | **Gene name** | **Gene product** | **lg2 fold change (G30e/GΔ*xyr1*f)** | **lg2 fold change (G30/GΔ*xyr1*)** |
| **RNA-seq** | **qRT-PCR** |
| TrireRUTC30: 104220 | *swo* | Swollenin | 9.29 | 2.28 |
| TrireRUTC30: 138519 | *qp* | Predicted sugar transporter | 8.18 | 3.23 |
| TrireRUTC30: 138633 | *ptr* | Predicted peptide transporter | -0.56 | -4.89 |
| TrireRUTC30: 121828 | *nmrA* | NmrA-like family domain-containing protein | 2.3 | 4.33 |
| TrireRUTC30: 135123 |  | succinyl-CoA ligase gene | 3.57 | 3.43 |
| TrireRUTC30: 116453 | *gpdh* | Glycerol-3-phosphate dehydrogenase | -2.19 | -3.56 |
| TrireRUTC30: 73724 | *hsp* | Heat shock protein | -2.22 | -3.06 |
| TrireRUTC30: 25176 | *hsp* | Heat shock protein | 3.14 | 2.86 |

a C30, the gene expression level in the parental strain Rut-C30 under lignocellulose condition.

b CΔ*xyr1*, the gene expression level in the *xyr1* deletion strain Δ*xyr1* under lignocellulose condition.

c resulted from the FPKM values showed by the RNA-seq data.

d resulted from the relative expression levels obtained by the qRT-PCR experiments. The values are means of three independent replicates. Student’s t-test was performed with Excel 2007 (Microsoft, WA, USA), employing a two-tailed test. And the *p* values were all lower than 0.05.

e G30, the gene expression level in the parental strain Rut-C30 under glucose condition.

f GΔ*xyr1*, the gene expression level in the *xyr1* deletion strain Δ*xyr1* under lignocellulose condition.
