# Supplementary material for: RNA Sequencing Reveals Xyr1 as a Transcription Factor Regulating Gene Expression beyond Carbohydrate Metabolism
Source: Hindawi journal article supplement (doi:10.1155/2016/4841756), 2016-01-01
Supplement: f1 [file 4841756.f1.zip › addition files/Table S4. Δxyr1-and-Rut-C30-DE under lignocellulose conditon.tbl-Funcation.xlsx]

## Sheet: C11-and-C30-DE.tbl-Funcation
Model	gene_id	gene	locus	FPKM_Δxyr1	FPKM_Rut-C30	log2(fold_change(Rut-C30_lignocellulose/Δxyr1_lignocellulose))	FDR_value	significant	Protein ID	IPRScan	SPROT	KEGG	KOG	GO	Funcat2
e_gw1.24.392.1	e_gw1.24.392.1	e_gw1.24.392.1	scaffold_24:488054-488824	0	484.831	1.79769e+308	3.98519e-08	yes	88887	IPR008262:Lipase, active site;;IPR000675:Cutinase	sp|Q99034|AXE1_TRIRE Acetylxylan esterase OS=Trichoderma reesei GN=axe1 PE=1 SV=1:312.768	-	-	metabolic process:GO:0008152;;hydrolase activity:GO:0016787;;catalytic activity:GO:0003824	01.05.03 polysaccharide metabolism	16.05 polysaccharide binding
e_gw1.28.118.1	e_gw1.28.118.1	e_gw1.28.118.1	scaffold_28:174334-176878	0	276.298	1.79769e+308	5.92613e-06	yes	90302	IPR005154:Glycoside hydrolase family 67;;IPR017853:Glycoside hydrolase, catalytic core;;IPR011100:Glycosyl hydrolase 67 middle;;IPR011395:Alpha-glucuronidase;;IPR011099:Glycosyl hydrolase 67, C-terminal	sp|Q99024|AGUA_TRIRE Alpha-glucuronidase OS=Trichoderma reesei PE=1 SV=1:1746.1	-	-	alpha-glucuronidase activity:GO:0046559;;xylan catabolic process:GO:0045493;;extracellular region:GO:0005576	01.05.03 polysaccharide metabolism	01.25.01 extracellular polysaccharide degradation N.crassa
e_gw1.34.52.1	e_gw1.34.52.1	e_gw1.34.52.1	scaffold_34:81952-83373	0	55.6261	1.79769e+308	9.37233e-09	yes	91667	IPR011050:Pectin lyase fold/virulence factor;;IPR000743:Glycoside hydrolase, family 28	sp|Q0CGP0|PGLRX_ASPTN Probable exopolygalacturonase X OS=Aspergillus terreus (strain NIH 2624 / FGSC A1156) GN=pgaX PE=3 SV=1:456.062	-	-	carbohydrate metabolic process:GO:0005975;;polygalacturonase activity:GO:0004650	01.05.03 polysaccharide metabolism
e_gw1.7.292.1	e_gw1.7.292.1	e_gw1.7.292.1	scaffold_7:766335-767997	0	20.1482	1.79769e+308	4.08628e-07	yes	77521	IPR006710:Glycoside hydrolase, family 43	sp|P94489|XYNB_BACSU Beta-xylosidase OS=Bacillus subtilis GN=xynB PE=1 SV=2:446.047	-	-	hydrolase activity, hydrolyzing O-glycosyl compounds:GO:0004553;;carbohydrate metabolic process:GO:0005975	01.05.02.07 sugar, glucoside, polyol and carboxylate catabolism B.subtilis	01.05.03 polysaccharide metabolism
estExt_fgenesh2_kg.C_190032	estExt_fgenesh2_kg.C_190032	estExt_fgenesh2_kg.C_190032	scaffold_19:256723-257402	0	352.743	1.79769e+308	1.06814e-07	yes	124438	IPR002594:Glycoside hydrolase, family 12;;IPR008985:Concanavalin A-like lectin/glucanase	sp|P22669|GUN_ASPAC Endoglucanase-1 OS=Aspergillus aculeatus PE=1 SV=1:214.927	-	-	polysaccharide catabolic process:GO:0000272;;cellulase activity:GO:0008810
estExt_fgenesh2_kg.C_30102	estExt_fgenesh2_kg.C_30102	estExt_fgenesh2_kg.C_30102	scaffold_3:818061-819609	0	152.895	1.79769e+308	4.35077e-05	yes	122377	IPR017853:Glycoside hydrolase, catalytic core;;IPR001547:Glycoside hydrolase, family 5;;IPR000254:Cellulose-binding region, fungal	sp|Q2TXJ2|MANA_ASPOR Probable mannan endo-1,4-beta-mannosidase A OS=Aspergillus oryzae (strain ATCC 42149 / RIB 40) GN=manA PE=3 SV=1:444.891	-	-	cellulose binding:GO:0030248;;hydrolase activity, hydrolyzing O-glycosyl compounds:GO:0004553;;carbohydrate metabolic process:GO:0005975;;extracellular region:GO:0005576
fgenesh1_pg.24_#_2	fgenesh1_pg.24_#_2	fgenesh1_pg.24_#_2	scaffold_24:3260-4012	0	13.8707	1.79769e+308	0.000173464	yes	38418	IPR001137:Glycoside hydrolase, family 11;;IPR008985:Concanavalin A-like lectin/glucanase	sp|P36218|XYN1_TRIRE Endo-1,4-beta-xylanase 1 OS=Trichoderma reesei GN=xyn1 PE=1 SV=1:464.922	-	-	hydrolase activity, hydrolyzing O-glycosyl compounds:GO:0004553;;carbohydrate metabolic process:GO:0005975	01.05 C-compound and carbohydrate metabolism	01.05.02.07 sugar, glucoside, polyol and carboxylate catabolism N.crassa	32.10.07 degradation / modification of foreign (exogenous) polysaccharides N.crassa
fgenesh1_pm.33_#_16	fgenesh1_pm.33_#_16	fgenesh1_pm.33_#_16	scaffold_33:37305-39735	0	71.8489	1.79769e+308	2.21846e-08	yes	134448	IPR017853:Glycoside hydrolase, catalytic core;;IPR000322:Glycoside hydrolase, family 31	sp|P31434|XYLS_ECOLI Alpha-xylosidase OS=Escherichia coli (strain K12) GN=yicI PE=1 SV=2:665.996	3.2.1.20:Alpha-glucosidase.	KOG1065:Maltase glucoamylase and related hydrolases, glycosyl hydrolase family 31	hydrolase activity, hydrolyzing O-glycosyl compounds:GO:0004553;;carbohydrate metabolic process:GO:0005975;;alpha-glucosidase activity:GO:0004558
fgenesh2_kg.3_#_136_#_gi|38139971|gb|CF885289.1|CF885289	fgenesh2_kg.3_#_136_#_gi|38139971|gb|CF885289.1|CF885289	fgenesh2_kg.3_#_136_#_gi|38139971|gb|CF885289.1|CF885289	scaffold_3:1210002-1210229	0	42.1634	1.79769e+308	0.00998145	yes
fgenesh2_kg.4_#_2_#_AAP57750.1	fgenesh2_kg.4_#_2_#_AAP57750.1	fgenesh2_kg.4_#_2_#_AAP57750.1	scaffold_4:59251-60220	0	70.0139	1.79769e+308	6.81022e-07	yes	118070	IPR005193:Glycoside hydrolase, family 62	sp|Q2U7D2|AXHA_ASPOR Probable alpha-L-arabinofuranosidase axhA OS=Aspergillus oryzae (strain ATCC 42149 / RIB 40) GN=axhA PE=3 SV=1:480.715	-	-	-
gm1.4703_g	gm1.4703_g	gm1.4703_g	scaffold_10:892170-892486	0	50.3341	1.79769e+308	0.00814737	yes
estExt_fgenesh1_pm.C_60197	estExt_fgenesh1_pm.C_60197	estExt_fgenesh1_pm.C_60197	scaffold_6:586262-587489	0.129702	333.322	11.3275	1.4464e-12	yes	136770	IPR013830:Esterase, SGNH hydrolase-type	-	-	-	-
e_gw1.33.40.1	e_gw1.33.40.1	e_gw1.33.40.1	scaffold_33:41673-43456	0.0825215	193.318	11.1939	3.02137e-12	yes	91594	IPR005828:General substrate transporter;;IPR007114:Major facilitator superfamily;;IPR003663:Sugar transporter;;IPR016196:MFS general substrate transporter;;IPR005829:Sugar transporter, conserved site	sp|P38156|MAL31_YEAST Maltose permease MAL31 OS=Saccharomyces cerevisiae (strain ATCC 204508 / S288c) GN=MAL31 PE=1 SV=1:380.178	5.3.1.4:L-arabinose isomerase.	KOG0254:Predicted transporter (major facilitator superfamily)	sugar:hydrogen symporter activity:GO:0005351;;L-arabinose isomerase activity:GO:0008733;;carbohydrate transport:GO:0008643;;transporter activity:GO:0005215;;integral to membrane:GO:0016021;;transport:GO:0006810;;membrane:GO:0016020	01.05 C-compound and carbohydrate metabolism	20.01.03 C-compound and carbohydrate transport	20.01.03.01 sugar transport	20.09.18 cellular import	20.09.18.07 non-vesicular cellular import	20.03 transport facilities	20.03.02.02.01 proton driven symporter
estExt_fgenesh1_pg.C_50028	estExt_fgenesh1_pg.C_50028	estExt_fgenesh1_pg.C_50028	scaffold_5:98718-101150	0.667973	1515.75	11.148	0	yes	140746	IPR001764:Glycoside hydrolase, family 3, N-terminal;;IPR002772:Glycoside hydrolase, family 3, C-terminal;;IPR017853:Glycoside hydrolase, catalytic core	sp|Q4WRB0|XYND_ASPFU Probable exo-1,4-beta-xylosidase xlnD OS=Neosartorya fumigata (strain ATCC MYA-4609 / Af293 / CBS 101355 / FGSC A1100) GN=xlnD PE=2 SV=1:1124	3.2.1.21:Beta-glucosidase.	-	hydrolase activity, hydrolyzing O-glycosyl compounds:GO:0004553;;carbohydrate metabolic process:GO:0005975;;beta-glucosidase activity:GO:0008422	01.05 C-compound and carbohydrate metabolism	01.05.03 polysaccharide metabolism	42.01 cell wall
estExt_fgenesh2_kg.C_540002	estExt_fgenesh2_kg.C_540002	estExt_fgenesh2_kg.C_540002	scaffold_54:22710-24150	0.19912	431.928	11.0829	0	yes	125575	IPR000254:Cellulose-binding region, fungal	sp|P49075|GUX3_AGABI Exoglucanase 3 OS=Agaricus bisporus GN=cel3 PE=1 SV=1:77.411	-	-	cellulose binding:GO:0030248;;hydrolase activity, hydrolyzing O-glycosyl compounds:GO:0004553;;carbohydrate metabolic process:GO:0005975;;extracellular region:GO:0005576
estExt_fgenesh2_kg.C_300009	estExt_fgenesh2_kg.C_300009	estExt_fgenesh2_kg.C_300009	scaffold_30:45338-47357	1.64632	3014.4	10.8384	0	yes	125125	IPR001722:Glycoside hydrolase, family 7;;IPR000254:Cellulose-binding region, fungal;;IPR008985:Concanavalin A-like lectin/glucanase	sp|P62694|GUX1_TRIRE Exoglucanase 1 OS=Trichoderma reesei GN=cbh1 PE=1 SV=1:991.875	-	KOG4562:Uncharacterized conserved protein (tumor-rejection antigen MAGE in humans)	cellulose binding:GO:0030248;;hydrolase activity, hydrolyzing O-glycosyl compounds:GO:0004553;;carbohydrate metabolic process:GO:0005975;;extracellular region:GO:0005576	01.05.03 polysaccharide metabolism
estExt_fgenesh2_kg.C_30202	estExt_fgenesh2_kg.C_30202	estExt_fgenesh2_kg.C_30202	scaffold_3:1882163-1884078	1.53026	2517.88	10.6842	0	yes	122470	IPR001524:Glycoside hydrolase, family 6;;IPR016288:1, 4-beta cellobiohydrolase;;IPR000254:Cellulose-binding region, fungal	sp|P07987|GUX2_TRIRE Exoglucanase 2 OS=Trichoderma reesei GN=cbh2 PE=1 SV=1:959.518	-	-	cellulose binding:GO:0030248;;hydrolase activity, hydrolyzing O-glycosyl compounds:GO:0004553;;carbohydrate metabolic process:GO:0005975;;extracellular region:GO:0005576	01.05 C-compound and carbohydrate metabolism	01.05.02.07 sugar, glucoside, polyol and carboxylate catabolism N.crassa	01.05.03 polysaccharide metabolism
e_gw1.54.21.1	e_gw1.54.21.1	e_gw1.54.21.1	scaffold_54:26168-27626	0.0998277	153.901	10.5903	5.56328e-11	yes	93498	IPR017853:Glycoside hydrolase, catalytic core;;IPR001139:Glycoside hydrolase, family 30	sp|Q45070|XYNC1_BACSU Glucuronoxylanase xynC OS=Bacillus subtilis GN=xynC PE=1 SV=1:63.5438	3.2.1.45:Glucosylceramidase.	KOG2566:Beta-glucocerebrosidase	lysosome:GO:0005764;;lysosome organization and biogenesis:GO:0007040;;sphingolipid metabolic process:GO:0006665;;glucosylceramidase activity:GO:0004348
estExt_fgenesh2_kg.C_260030	estExt_fgenesh2_kg.C_260030	estExt_fgenesh2_kg.C_260030	scaffold_26:300331-301211	2.41768	3589.63	10.536	0	yes	124931	IPR001137:Glycoside hydrolase, family 11;;IPR008985:Concanavalin A-like lectin/glucanase	sp|P36217|XYN2_TRIRE Endo-1,4-beta-xylanase 2 OS=Trichoderma reesei GN=xyn2 PE=1 SV=1:422.55	-	-	hydrolase activity, hydrolyzing O-glycosyl compounds:GO:0004553;;carbohydrate metabolic process:GO:0005975	01.05 C-compound and carbohydrate metabolism	01.05.02.07 sugar, glucoside, polyol and carboxylate catabolism N.crassa	32.10.07 degradation / modification of foreign (exogenous) polysaccharides N.crassa
estExt_Genemark1.C_2_t10124	estExt_Genemark1.C_2_t10124	estExt_Genemark1.C_2_t10124	scaffold_2:415654-417264	0.321992	476.61	10.5316	0	yes	23616	IPR017853:Glycoside hydrolase, catalytic core;;IPR001000:Glycoside hydrolase, family 10	sp|P23360|XYNA_THEAU Endo-1,4-beta-xylanase OS=Thermoascus aurantiacus GN=XYNA PE=1 SV=4:420.239	-	-	hydrolase activity, hydrolyzing O-glycosyl compounds:GO:0004553;;carbohydrate metabolic process:GO:0005975	01.05.03 polysaccharide metabolism	16.05 polysaccharide binding
estExt_fgenesh1_pg.C_1_t10122	estExt_fgenesh1_pg.C_1_t10122	estExt_fgenesh1_pg.C_1_t10122	scaffold_1:516918-518027	1.1174	1607.74	10.4907	0	yes	139631	IPR008262:Lipase, active site;;IPR000254:Cellulose-binding region, fungal;;IPR000675:Cutinase	sp|Q99034|AXE1_TRIRE Acetylxylan esterase OS=Trichoderma reesei GN=axe1 PE=1 SV=1:610.527	-	-	metabolic process:GO:0008152;;cellulose binding:GO:0030248;;hydrolase activity, hydrolyzing O-glycosyl compounds:GO:0004553;;carbohydrate metabolic process:GO:0005975;;hydrolase activity:GO:0016787;;catalytic activity:GO:0003824;;extracellular region:GO:0005576	01.05.03 polysaccharide metabolism	16.05 polysaccharide binding
e_gw1.30.20.1	e_gw1.30.20.1	e_gw1.30.20.1	scaffold_30:31290-32879	0.884185	1238.87	10.4524	0	yes	90847	IPR017853:Glycoside hydrolase, catalytic core;;IPR001139:Glycoside hydrolase, family 30	sp|Q45070|XYNC1_BACSU Glucuronoxylanase xynC OS=Bacillus subtilis GN=xynC PE=1 SV=1:68.5514	3.2.1.45:Glucosylceramidase.	KOG2566:Beta-glucocerebrosidase	lysosome:GO:0005764;;lysosome organization and biogenesis:GO:0007040;;sphingolipid metabolic process:GO:0006665;;glucosylceramidase activity:GO:0004348
e_gw1.3.1006.1	e_gw1.3.1006.1	e_gw1.3.1006.1	scaffold_3:1861288-1862724	1.00976	1382.16	10.4187	0	yes	72489	IPR017853:Glycoside hydrolase, catalytic core;;IPR001547:Glycoside hydrolase, family 5;;IPR000254:Cellulose-binding region, fungal	sp|P07982|GUN2_TRIRE Endoglucanase EG-II OS=Trichoderma reesei GN=egl2 PE=1 SV=1:845.884	-	-	cellulose binding:GO:0030248;;hydrolase activity, hydrolyzing O-glycosyl compounds:GO:0004553;;carbohydrate metabolic process:GO:0005975;;extracellular region:GO:0005576
estExt_fgenesh2_kg.C_1_t10058	estExt_fgenesh2_kg.C_1_t10058	estExt_fgenesh2_kg.C_1_t10058	scaffold_1:519729-520907	1.04369	1426.88	10.417	0	yes	121449	IPR000254:Cellulose-binding region, fungal	sp|P19355|GUX1_TRIVI Exoglucanase 1 OS=Trichoderma viride GN=cbh1 PE=3 SV=2:85.8853	-	-	cellulose binding:GO:0030248;;hydrolase activity, hydrolyzing O-glycosyl compounds:GO:0004553;;carbohydrate metabolic process:GO:0005975;;extracellular region:GO:0005576
estExt_fgenesh1_pm.C_190177	estExt_fgenesh1_pm.C_190177	estExt_fgenesh1_pm.C_190177	scaffold_19:569288-571762	1.21574	1443.12	10.2131	0	yes	138519	IPR005828:General substrate transporter;;IPR007114:Major facilitator superfamily;;IPR003663:Sugar transporter;;IPR016196:MFS general substrate transporter;;IPR005829:Sugar transporter, conserved site	sp|Q4U3U6|QAY_NEUAF Quinate permease OS=Neurospora africana GN=qa-y PE=3 SV=1:270.396	5.3.1.4:L-arabinose isomerase.	KOG0254:Predicted transporter (major facilitator superfamily)	sugar:hydrogen symporter activity:GO:0005351;;L-arabinose isomerase activity:GO:0008733;;carbohydrate transport:GO:0008643;;transporter activity:GO:0005215;;integral to membrane:GO:0016021;;transport:GO:0006810;;membrane:GO:0016020	20.01.03 C-compound and carbohydrate transport	20.09.18.07 non-vesicular cellular import
estExt_fgenesh1_pg.C_1_t10124	estExt_fgenesh1_pg.C_1_t10124	estExt_fgenesh1_pg.C_1_t10124	scaffold_1:521457-522808	1.0785	1230.96	10.1565	0	yes	139633	IPR000254:Cellulose-binding region, fungal;;IPR005103:Glycoside hydrolase, family 61	sp|O14405|GUN4_TRIRE Endoglucanase-4 OS=Trichoderma reesei GN=cel61a PE=1 SV=1:691.804	-	KOG4157:beta-1,6-N-acetylglucosaminyltransferase, contains WSC domain	cellulose binding:GO:0030248;;hydrolase activity, hydrolyzing O-glycosyl compounds:GO:0004553;;carbohydrate metabolic process:GO:0005975;;extracellular region:GO:0005576	01.05.03 polysaccharide metabolism	01.25.01 extracellular polysaccharide degradation N.crassa
estExt_fgenesh2_kg.C_40049	estExt_fgenesh2_kg.C_40049	estExt_fgenesh2_kg.C_40049	scaffold_4:810379-811560	1.57373	1683.48	10.063	0	yes	122518	IPR008957:Fibronectin, type III-like fold;;IPR005103:Glycoside hydrolase, family 61	sp|Q7Z9M7|GUN7_TRIRE Endoglucanase-7 OS=Trichoderma reesei GN=cel61b PE=1 SV=1:509.99	-	-	-	01.05.02.07 sugar, glucoside, polyol and carboxylate catabolism N.crassa	01.05.03 polysaccharide metabolism	01.25.01 extracellular polysaccharide degradation N.crassa
gm1.860_g	gm1.860_g	gm1.860_g	scaffold_1:3108857-3110364	0.499138	399.161	9.64332	0	yes	5304	IPR001722:Glycoside hydrolase, family 7;;IPR000254:Cellulose-binding region, fungal;;IPR008985:Concanavalin A-like lectin/glucanase	sp|P07981|GUN1_TRIRE Endoglucanase EG-1 OS=Trichoderma reesei GN=egl1 PE=1 SV=1:934.48	-	-	cellulose binding:GO:0030248;;hydrolase activity, hydrolyzing O-glycosyl compounds:GO:0004553;;carbohydrate metabolic process:GO:0005975;;extracellular region:GO:0005576	01.05.03 polysaccharide metabolism
estExt_Genemark1.C_170165	estExt_Genemark1.C_170165	estExt_Genemark1.C_170165	scaffold_17:633215-634193	0.18822	112.369	9.22161	2.18124e-08	yes	25940	IPR000254:Cellulose-binding region, fungal;;IPR009009:Barwin-related endoglucanase;;IPR007112:Expansin 45, endoglucanase-like;;IPR000334:Glycoside hydrolase, family 45	sp|P43317|GUN5_TRIRE Endoglucanase-5 OS=Trichoderma reesei GN=egl5 PE=3 SV=1:478.789	-	-	cellulose binding:GO:0030248;;hydrolase activity, hydrolyzing O-glycosyl compounds:GO:0004553;;carbohydrate metabolic process:GO:0005975;;cellulase activity:GO:0008810;;extracellular region:GO:0005576
estExt_Genewise1Plus.C_300040	estExt_Genewise1Plus.C_300040	estExt_Genewise1Plus.C_300040	scaffold_30:34984-36773	4.11598	1748.14	8.73037	0	yes	104220	IPR007117:Pollen allergen/expansin, C-terminal;;IPR000254:Cellulose-binding region, fungal;;IPR009009:Barwin-related endoglucanase;;IPR007112:Expansin 45, endoglucanase-like	sp|Q40638|EXPB1_ORYSJ Expansin-B1 OS=Oryza sativa subsp. japonica GN=EXPB1a PE=1 SV=2:64.6994	-	KOG4157:beta-1,6-N-acetylglucosaminyltransferase, contains WSC domain	cellulose binding:GO:0030248;;hydrolase activity, hydrolyzing O-glycosyl compounds:GO:0004553;;carbohydrate metabolic process:GO:0005975;;extracellular region:GO:0005576
fgenesh1_pm.3_#_570	fgenesh1_pm.3_#_570	fgenesh1_pm.3_#_570	scaffold_3:1834601-1835693	1.01552	347.214	8.41746	0	yes	127981	IPR000683:Oxidoreductase, N-terminal;;IPR016040:NAD(P)-binding;;IPR004104:Oxidoreductase, C-terminal	sp|Q04869|YM94_YEAST Uncharacterized protein YMR315W OS=Saccharomyces cerevisiae (strain ATCC 204508 / S288c) GN=YMR315W PE=1 SV=1:102.449	-	KOG2742:Predicted oxidoreductase	metabolic process:GO:0008152;;electron transport:GO:0006118;;catalytic activity:GO:0003824;;binding:GO:0005488;;oxidoreductase activity:GO:0016491
e_gw1.33.14.1	e_gw1.33.14.1	e_gw1.33.14.1	scaffold_33:22650-24015	0.101188	8.98228	6.47197	0.000310647	yes
estExt_Genewise1.C_11_t20268	estExt_Genewise1.C_11_t20268	estExt_Genewise1.C_11_t20268	scaffold_11:969946-972791	4.24719	346.026	6.34823	0	yes	111943	IPR002860:BNR repeat;;IPR000254:Cellulose-binding region, fungal	sp|Q7Z9M8|XG74_TRIRE Xyloglucanase OS=Trichoderma reesei GN=cel74a PE=1 SV=1:1662.51	-	KOG3599:Ca2+-modulated nonselective cation channel polycystin	cellulose binding:GO:0030248;;hydrolase activity, hydrolyzing O-glycosyl compounds:GO:0004553;;carbohydrate metabolic process:GO:0005975;;extracellular region:GO:0005576	01.05.03 polysaccharide metabolism	01.25.01 extracellular polysaccharide degradation N.crassa	32.10.07 degradation / modification of foreign (exogenous) polysaccharides N.crassa	16.05 polysaccharide binding
estExt_Genewise1Plus.C_5_t10017	estExt_Genewise1Plus.C_5_t10017	estExt_Genewise1Plus.C_5_t10017	scaffold_5:14664-16575	0.61506	46.5746	6.24267	0	yes	97259	IPR005828:General substrate transporter;;IPR007114:Major facilitator superfamily;;IPR003663:Sugar transporter;;IPR016196:MFS general substrate transporter	sp|P49374|HGT1_KLULA High-affinity glucose transporter OS=Kluyveromyces lactis (strain ATCC 8585 / CBS 2359 / DSM 70799 / NBRC 1267 / NRRL Y-1140 / WM37) GN=HGT1 PE=3 SV=1:176.022	5.3.1.4:L-arabinose isomerase.	KOG0254:Predicted transporter (major facilitator superfamily)	sugar:hydrogen symporter activity:GO:0005351;;L-arabinose isomerase activity:GO:0008733;;carbohydrate transport:GO:0008643;;transporter activity:GO:0005215;;integral to membrane:GO:0016021;;transport:GO:0006810;;membrane:GO:0016020	20.01.03 C-compound and carbohydrate transport	20.09.18 cellular import	20.09.18.07 non-vesicular cellular import	20.03 transport facilities
e_gw1.1.591.1	e_gw1.1.591.1	e_gw1.1.591.1	scaffold_1:2439348-2440308	0.160087	11.6266	6.18243	0.000690099	yes	67663	IPR004304:Acetamidase/Formamidase	sp|Q9URY7|FMDA_SCHPO Putative formamidase C869.04 OS=Schizosaccharomyces pombe (strain ATCC 38366 / 972) GN=SPAC869.04 PE=2 SV=1:103.99	3.5.1.49:Formamidase.	-	metabolic process:GO:0008152;;hydrolase activity, acting on carbon-nitrogen (but not peptide) bonds, in linear amides:GO:0016811;;formamidase activity:GO:0004328
e_gw1.1.749.1	e_gw1.1.749.1	e_gw1.1.749.1	scaffold_1:2948435-2950583	0.221036	14.8916	6.07407	4.30304e-10	yes	69332	IPR000719:Protein kinase, core;;IPR011009:Protein kinase-like	-	-	KOG1474:Transcription initiation factor TFIID, subunit BDF1 and related bromodomain proteins	ATP binding:GO:0005524;;protein kinase activity:GO:0004672;;protein amino acid phosphorylation:GO:0006468
estExt_fgenesh1_pm.C_50031	estExt_fgenesh1_pm.C_50031	estExt_fgenesh1_pm.C_50031	scaffold_5:102432-104802	0.734744	43.8553	5.89937	0	yes	136547	IPR001764:Glycoside hydrolase, family 3, N-terminal;;IPR002772:Glycoside hydrolase, family 3, C-terminal;;IPR017853:Glycoside hydrolase, catalytic core	sp|B0YB65|BGLL_ASPFC Probable beta-glucosidase L OS=Neosartorya fumigata (strain CEA10 / CBS 144.89 / FGSC A1163) GN=bglL PE=3 SV=1:879.782	3.2.1.21:Beta-glucosidase.	-	hydrolase activity, hydrolyzing O-glycosyl compounds:GO:0004553;;carbohydrate metabolic process:GO:0005975;;beta-glucosidase activity:GO:0008422	01.05.02.07 sugar, glucoside, polyol and carboxylate catabolism N.crassa	01.05.03 polysaccharide metabolism
e_gw1.1.629.1	e_gw1.1.629.1	e_gw1.1.629.1	scaffold_1:2701281-2703846	2.3722	134.346	5.82358	0	yes	67432	IPR017853:Glycoside hydrolase, catalytic core;;IPR006102:Glycoside hydrolase family 2, immunoglobulin-like beta-sandwich;;IPR008979:Galactose-binding like;;IPR006104:Glycoside hydrolase family 2, carbohydrate-binding	sp|Q0CCA0|MANBB_ASPTN Probable beta-mannosidase B OS=Aspergillus terreus (strain NIH 2624 / FGSC A1156) GN=mndB PE=3 SV=2:790.801	3.2.1.25:Beta-mannosidase.	KOG2230:Predicted beta-mannosidase	hydrolase activity, hydrolyzing O-glycosyl compounds:GO:0004553;;carbohydrate metabolic process:GO:0005975;;beta-mannosidase activity:GO:0004567	01.05.03 polysaccharide metabolism
fgenesh1_pm.3_#_569	fgenesh1_pm.3_#_569	fgenesh1_pm.3_#_569	scaffold_3:1831840-1833598	1.07121	54.7638	5.67591	0	yes	127980	IPR005828:General substrate transporter;;IPR007114:Major facilitator superfamily;;IPR003663:Sugar transporter;;IPR016196:MFS general substrate transporter	sp|P07921|LACP_KLULA Lactose permease OS=Kluyveromyces lactis (strain ATCC 8585 / CBS 2359 / DSM 70799 / NBRC 1267 / NRRL Y-1140 / WM37) GN=LAC12 PE=3 SV=1:299.671	-	KOG0254:Predicted transporter (major facilitator superfamily)	sugar:hydrogen symporter activity:GO:0005351;;carbohydrate transport:GO:0008643;;transporter activity:GO:0005215;;integral to membrane:GO:0016021;;transport:GO:0006810;;membrane:GO:0016020
estExt_Genewise1Plus.C_1_t50314	estExt_Genewise1Plus.C_1_t50314	estExt_Genewise1Plus.C_1_t50314	scaffold_1:2952734-2954260	16.8019	857.993	5.67427	0	yes	94809	IPR001395:Aldo/keto reductase	sp|Q876L8|XYL1_TRIRE NAD(P)H-dependent D-xylose reductase xyl1 OS=Trichoderma reesei GN=xyl1 PE=3 SV=1:676.011	1.1.1.179:D-xylose 1-dehydrogenase (NADP+).	KOG1577:Aldo/keto reductase family proteins	oxidoreductase activity:GO:0016491;;D-xylose 1-dehydrogenase (NADP+) activity:GO:0047837	01.05 C-compound and carbohydrate metabolism	01.05.02 sugar, glucoside, polyol and carboxylate metabolism	01.05.02.07 sugar, glucoside, polyol and carboxylate catabolism S.cerevisiae	01.05.03 polysaccharide metabolism	01.06 lipid, fatty acid and isoprenoid metabolism	01.06.06 isoprenoid metabolism	01.06.06.11 tetracyclic and pentacyclic triterpenes (cholesterin, steroids and hopanoids) metabolism	01.07 metabolism of vitamins, cofactors, and prosthetic groups	01.20 secondary metabolism	01.20.17.09 metabolism of alkaloids	02.16 fermentation	32.01.03 osmotic and salt stress response	32.01.05 heat shock response	32.10 degradation / modification of foreign (exogenous) compounds	34.11.03.13 osmosensing	16.21.07 NAD/NADP binding
e_gw1.5.1126.1	e_gw1.5.1126.1	e_gw1.5.1126.1	scaffold_5:1348366-1349643	0.466191	22.2518	5.57686	1.83038e-08	yes	75795	IPR016040:NAD(P)-binding;;IPR002347:Glucose/ribitol dehydrogenase;;IPR002198:Short-chain dehydrogenase/reductase SDR	sp|Q03326|OXIR_STRAT Probable oxidoreductase OS=Streptomyces antibioticus PE=3 SV=1:115.546	1.1.1.-:With NAD(+) or NADP(+) as acceptor.	KOG1208:Dehydrogenases with different specificities (related to short-chain alcohol dehydrogenases)	mevaldate reductase activity:GO:0004495;;epoxide dehydrogenase activity:GO:0018451;;steroid dehydrogenase activity:GO:0016229;;steroid dehydrogenase activity, acting on the CH-CH group of donors:GO:0033765;;metabolic process:GO:0008152;;3-keto sterol reductase activity:GO:0000253;;(R)-2-hydroxyglutarate dehydrogenase activity:GO:0051990;;catalytic activity:GO:0003824;;oxidoreductase activity:GO:0…	01.05 C-compound and carbohydrate metabolism	01.06 lipid, fatty acid and isoprenoid metabolism N.crassa	01.07 metabolism of vitamins, cofactors, and prosthetic groups	34.11 cellular sensing and response to external stimulus	34.11.01 photoperception and response
fgenesh1_pg.21_#_123	fgenesh1_pg.21_#_123	fgenesh1_pg.21_#_123	scaffold_21:488497-490478	0.228753	10.2879	5.49101	4.8138e-08	yes	38144	IPR013121:Ferric reductase, NAD binding;;IPR013130:Ferric reductase-like transmembrane component, N-terminal;;IPR013112:FAD-binding 8	sp|P36033|FRE2_YEAST Ferric/cupric reductase transmembrane component 2 OS=Saccharomyces cerevisiae (strain ATCC 204508 / S288c) GN=FRE2 PE=1 SV=1:106.301	-	KOG0039:Ferric reductase, NADH/NADPH oxidase and related proteins	FAD binding:GO:0050660;;electron transport:GO:0006118;;ferric-chelate reductase activity:GO:0000293;;integral to membrane:GO:0016021;;oxidoreductase activity:GO:0016491;;iron ion binding:GO:0005506	34.01.01.01 homeostasis of metal ions (Na, K, Ca etc.) N.crassa	20.03 transport facilities
gm1.3368_g	gm1.3368_g	gm1.3368_g	scaffold_6:1052830-1055358	1.02791	36.2331	5.13952	0	yes	7812	IPR016624:Uncharacterised conserved protein UCP014753	-	-	-	-
estExt_fgenesh2_kg.C_50002	estExt_fgenesh2_kg.C_50002	estExt_fgenesh2_kg.C_50002	scaffold_5:11116-13451	0.946412	30.1011	4.9912	0	yes	122639	IPR001764:Glycoside hydrolase, family 3, N-terminal;;IPR002772:Glycoside hydrolase, family 3, C-terminal;;IPR017853:Glycoside hydrolase, catalytic core;;IPR011658:PA14	sp|Q5B6C7|BGLH_EMENI Probable beta-glucosidase H OS=Emericella nidulans GN=bglH PE=3 SV=2:1036.56	3.2.1.21:Beta-glucosidase.	-	hydrolase activity, hydrolyzing O-glycosyl compounds:GO:0004553;;carbohydrate metabolic process:GO:0005975;;beta-glucosidase activity:GO:0008422	01.05.03 polysaccharide metabolism
e_gw1.2.1794.1	e_gw1.2.1794.1	e_gw1.2.1794.1	scaffold_2:259017-261130	0.363181	11.3743	4.96894	1.37217e-08	yes	71638	IPR017853:Glycoside hydrolase, catalytic core;;IPR006215:Glycoside hydrolase, melibiase;;IPR002241:Glycoside hydrolase, family 27;;IPR000111:Glycoside hydrolase, clan GH-D	sp|Q9P4V4|MEL_ZYGMR Alpha-galactosidase OS=Zygosaccharomyces mrakii GN=MEL PE=3 SV=1:483.797	3.2.1.22:Alpha-galactosidase.	KOG2366:Alpha-D-galactosidase (melibiase)	alpha-galactosidase activity:GO:0004557;;hydrolase activity, hydrolyzing O-glycosyl compounds:GO:0004553;;carbohydrate metabolic process:GO:0005975	01.05 C-compound and carbohydrate metabolism	01.05.03 polysaccharide metabolism	42.01 cell wall
gm1.7136_g	gm1.7136_g	gm1.7136_g	scaffold_22:428207-429647	0.473668	12.2129	4.68839	4.36928e-09	yes	11580	IPR017853:Glycoside hydrolase, catalytic core;;IPR001680:WD40 repeat	sp|Q76FP5|6GAL_TRIVI Endo-beta-1,6-galactanase OS=Trichoderma viride GN=6GAL PE=1 SV=1:896.73	-	-	-
estExt_Genewise1.C_19_t20023	estExt_Genewise1.C_19_t20023	estExt_Genewise1.C_19_t20023	scaffold_19:606359-608713	1.06333	26.4246	4.63521	0	yes	114133	IPR012132:Glucose-methanol-choline oxidoreductase;;IPR007867:Glucose-methanol-choline oxidoreductase, C-terminal;;IPR000172:Glucose-methanol-choline oxidoreductase, N-terminal	sp|P04841|ALOX_PICAN Alcohol oxidase OS=Pichia angusta GN=MOX PE=3 SV=1:912.909	1.1.99.1:Choline dehydrogenase.	KOG1238:Glucose dehydrogenase/choline dehydrogenase/mandelonitrile lyase (GMC oxidoreductase family)	oxidoreductase activity, acting on CH-OH group of donors:GO:0016614;;FAD binding:GO:0050660;;alcohol metabolic process:GO:0006066;;choline dehydrogenase activity:GO:0008812	01.05 C-compound and carbohydrate metabolism
estExt_Genewise1.C_5_t30024	estExt_Genewise1.C_5_t30024	estExt_Genewise1.C_5_t30024	scaffold_5:1351555-1353881	209.25	3369.61	4.00928	0	yes	109243	IPR005828:General substrate transporter;;IPR007114:Major facilitator superfamily;;IPR003663:Sugar transporter;;IPR016196:MFS general substrate transporter;;IPR005829:Sugar transporter, conserved site	sp|P07921|LACP_KLULA Lactose permease OS=Kluyveromyces lactis (strain ATCC 8585 / CBS 2359 / DSM 70799 / NBRC 1267 / NRRL Y-1140 / WM37) GN=LAC12 PE=3 SV=1:279.256	5.3.1.4:L-arabinose isomerase.	KOG0254:Predicted transporter (major facilitator superfamily)	sugar:hydrogen symporter activity:GO:0005351;;L-arabinose isomerase activity:GO:0008733;;carbohydrate transport:GO:0008643;;transporter activity:GO:0005215;;integral to membrane:GO:0016021;;transport:GO:0006810;;membrane:GO:0016020	20.01.03 C-compound and carbohydrate transport	20.09.18 cellular import	20.09.18.07 non-vesicular cellular import	20.03 transport facilities
fgenesh1_pg.48_#_15	fgenesh1_pg.48_#_15	fgenesh1_pg.48_#_15	scaffold_48:56123-56940	4.60138	72.7074	3.98196	6.72744e-13	yes	39912	-	-	-	KOG4157:beta-1,6-N-acetylglucosaminyltransferase, contains WSC domain	-
fgenesh1_pg.3_#_508	fgenesh1_pg.3_#_508	fgenesh1_pg.3_#_508	scaffold_3:1826016-1828000	5.8268	86.8839	3.89831	0	yes	33630	IPR005828:General substrate transporter;;IPR007114:Major facilitator superfamily;;IPR003663:Sugar transporter;;IPR016196:MFS general substrate transporter;;IPR005829:Sugar transporter, conserved site	sp|P49374|HGT1_KLULA High-affinity glucose transporter OS=Kluyveromyces lactis (strain ATCC 8585 / CBS 2359 / DSM 70799 / NBRC 1267 / NRRL Y-1140 / WM37) GN=HGT1 PE=3 SV=1:480.33	5.3.1.4:L-arabinose isomerase.	KOG0254:Predicted transporter (major facilitator superfamily)	sugar:hydrogen symporter activity:GO:0005351;;L-arabinose isomerase activity:GO:0008733;;carbohydrate transport:GO:0008643;;transporter activity:GO:0005215;;integral to membrane:GO:0016021;;transport:GO:0006810;;membrane:GO:0016020	20.01.03 C-compound and carbohydrate transport	20.09.18.07 non-vesicular cellular import
estExt_fgenesh2_kg.C_80062	estExt_fgenesh2_kg.C_80062	estExt_fgenesh2_kg.C_80062	scaffold_8:667045-667862	0.934465	13.2128	3.82165	5.72254e-05	yes
e_gw1.3.637.1	e_gw1.3.637.1	e_gw1.3.637.1	scaffold_3:1393043-1393748	6.14182	86.8214	3.82131	1.7639e-13	yes	73633	IPR016181:Acyl-CoA N-acyltransferase;;IPR000182:GCN5-related N-acetyltransferase	-	-	-	metabolic process:GO:0008152;;N-acetyltransferase activity:GO:0008080
estExt_fgenesh1_pg.C_330005	estExt_fgenesh1_pg.C_330005	estExt_fgenesh1_pg.C_330005	scaffold_33:20489-21960	2.95963	41.7598	3.81863	0	yes	143118	IPR007345:Polysaccharide pyruvyl transferase;;IPR008263:Glycoside hydrolase, family 16, active site	sp|Q9UT27|PVG1_SCHPO Pyruvyl transferase 1 OS=Schizosaccharomyces pombe (strain ATCC 38366 / 972) GN=pvg1 PE=2 SV=1:164.081	-	-	hydrolase activity, hydrolyzing O-glycosyl compounds:GO:0004553;;carbohydrate metabolic process:GO:0005975
gm1.8306_g	gm1.8306_g	gm1.8306_g	scaffold_33:206863-208187	0.846781	11.6441	3.78146	8.74582e-08	yes
e_gw1.1.2809.1	e_gw1.1.2809.1	e_gw1.1.2809.1	scaffold_1:1946934-1948764	1.80174	23.7733	3.72188	4.52384e-12	yes	69330	IPR007114:Major facilitator superfamily;;IPR011701:Major facilitator superfamily MFS-1;;IPR016196:MFS general substrate transporter	sp|Q08280|BSC6_YEAST Bypass of stop codon protein 6 OS=Saccharomyces cerevisiae (strain ATCC 204508 / S288c) GN=BSC6 PE=1 SV=1:132.494	-	-	transporter activity:GO:0005215;;integral to membrane:GO:0016021;;transport:GO:0006810
fgenesh1_pg.34_#_25	fgenesh1_pg.34_#_25	fgenesh1_pg.34_#_25	scaffold_34:67959-69513	0.915683	11.789	3.68645	5.33479e-09	yes	39427	IPR003042:Aromatic-ring hydroxylase;;IPR002938:Monooxygenase, FAD-binding	sp|Q53552|NHG2_PSEPU Salicylate hydroxylase OS=Pseudomonas putida GN=nahG PE=4 SV=1:209.534	1.14.13.1:Salicylate 1-monooxygenase.	KOG2614:Kynurenine 3-monooxygenase and related flavoprotein monooxygenases	metabolic process:GO:0008152;;aromatic compound metabolic process:GO:0006725;;salicylate 1-monooxygenase activity:GO:0018658;;electron transport:GO:0006118;;oxidoreductase activity:GO:0016491;;monooxygenase activity:GO:0004497	01.20 secondary metabolism
e_gw1.6.524.1	e_gw1.6.524.1	e_gw1.6.524.1	scaffold_6:1094836-1095349	2.23603	26.04	3.54172	4.58834e-05	yes	76316	IPR016181:Acyl-CoA N-acyltransferase;;IPR000182:GCN5-related N-acetyltransferase	-	-	-	metabolic process:GO:0008152;;N-acetyltransferase activity:GO:0008080
estExt_Genewise1Plus.C_3_t10184	estExt_Genewise1Plus.C_3_t10184	estExt_Genewise1Plus.C_3_t10184	scaffold_3:200196-202438	9.06836	100.034	3.46351	0	yes	96157	IPR011333:BTB/POZ fold;;IPR000210:BTB/POZ-like	-	-	KOG4475:FOG: Immunoglobin and related proteins	protein binding:GO:0005515
estExt_Genewise1Plus.C_8_t10169	estExt_Genewise1Plus.C_8_t10169	estExt_Genewise1Plus.C_8_t10169	scaffold_8:199351-202301	3.98957	42.9395	3.428	0	yes	98788	IPR007219:Fungal specific transcription factor;;IPR001138:Fungal transcriptional regulatory protein, N-terminal	sp|Q2UD93|XLNR_ASPOR Xylanolytic transcriptional activator xlnR OS=Aspergillus oryzae (strain ATCC 42149 / RIB 40) GN=xlnR PE=1 SV=2:784.252	-	-	regulation of transcription, DNA-dependent:GO:0006355;;nucleus:GO:0005634;;zinc ion binding:GO:0008270;;transcription:GO:0006350;;DNA binding:GO:0003677;;transcription factor activity:GO:0003700	01.05.25 regulation of C-compound and carbohydrate metabolism N.crassa	11.02.03.04 transcriptional control
fgenesh1_pm.27_#_65	fgenesh1_pm.27_#_65	fgenesh1_pm.27_#_65	scaffold_27:228098-228632	2.88755	30.9235	3.42079	4.1093e-06	yes	133861	IPR016181:Acyl-CoA N-acyltransferase;;IPR008125:Streptothricin acetyltransferase;;IPR000182:GCN5-related N-acetyltransferase	sp|P13018|STA_ECOLX Streptothricin acetyltransferase OS=Escherichia coli GN=sat-1 PE=4 SV=1:84.7297	-	KOG3139:N-acetyltransferase	transferase activity, transferring acyl groups:GO:0016746;;metabolic process:GO:0008152;;N-acetyltransferase activity:GO:0008080
estExt_Genemark1.C_70138	estExt_Genemark1.C_70138	estExt_Genemark1.C_70138	scaffold_7:500776-501903	26.4657	282.935	3.41828	0	yes	24672	IPR011013:Glycoside hydrolase-type carbohydrate-binding;;IPR008183:Aldose 1-epimerase	sp|P04397|GAL10_YEAST Bifunctional protein GAL10 OS=Saccharomyces cerevisiae (strain ATCC 204508 / S288c) GN=GAL10 PE=1 SV=2:201.445	5.1.3.3:Aldose 1-epimerase.	KOG1604:Predicted mutarotase	carbohydrate binding:GO:0030246;;carbohydrate metabolic process:GO:0005975;;aldose 1-epimerase activity:GO:0004034;;catalytic activity:GO:0003824;;isomerase activity:GO:0016853	01.05 C-compound and carbohydrate metabolism	01.05.02 sugar, glucoside, polyol and carboxylate metabolism	16.01 protein binding
fgenesh1_pg.1_#_460	fgenesh1_pg.1_#_460	fgenesh1_pg.1_#_460	scaffold_1:1814013-1815317	9.65086	101.092	3.38887	0	yes	31971	IPR000683:Oxidoreductase, N-terminal;;IPR016040:NAD(P)-binding	sp|Q9UT60|YKJ6_SCHPO Uncharacterized oxidoreductase C513.06c OS=Schizosaccharomyces pombe (strain ATCC 38366 / 972) GN=SPAC513.06c PE=2 SV=1:201.06	1.3.1.20:Trans-1,2-dihydrobenzene-1,2-diol dehydrogenase.	KOG2741:Dimeric dihydrodiol dehydrogenase	metabolic process:GO:0008152;;trans-1,2-dihydrobenzene-1,2-diol dehydrogenase activity:GO:0047115;;catalytic activity:GO:0003824;;binding:GO:0005488;;oxidoreductase activity:GO:0016491	01.05.11 aromate metabolism	01.07.04 utilization of vitamins, cofactors, and prosthetic groups	01.20 secondary metabolism	30.05 transmembrane signal transduction	40.02.03 activity of intercellular mediators
estExt_Genewise1Plus.C_280058	estExt_Genewise1Plus.C_280058	estExt_Genewise1Plus.C_280058	scaffold_28:53687-55664	14.3252	149.173	3.38036	0	yes	103899	IPR012946:X8;;IPR004886:Glycolipid anchored surface protein GAS1;;IPR017853:Glycoside hydrolase, catalytic core	sp|P0C956|GEL4_ASPFU 1,3-beta-glucanosyltransferase gel4 OS=Neosartorya fumigata (strain ATCC MYA-4609 / Af293 / CBS 101355 / FGSC A1100) GN=gel4 PE=3 SV=1:508.834	-	-	-
estExt_Genemark1.C_200159	estExt_Genemark1.C_200159	estExt_Genemark1.C_200159	scaffold_20:589338-591355	8.5583	88.3368	3.36762	0	yes	26187	IPR000577:Carbohydrate kinase, FGGY	sp|A1DEK3|XKS1_NEOFI Probable D-xylulose kinase A OS=Neosartorya fischeri (strain ATCC 1020 / DSM 3700 / FGSC A1164 / NRRL 181) GN=xkiA PE=2 SV=1:686.797	2.7.1.17:Xylulokinase.	KOG2531:Sugar (pentulose and hexulose) kinases	xylulokinase activity:GO:0004856;;carbohydrate metabolic process:GO:0005975	01.04 phosphate metabolism	01.05 C-compound and carbohydrate metabolism	01.05.02.07 sugar, glucoside, polyol and carboxylate catabolism S.cerevisiae	16.19.03 ATP binding
e_gw1.3.649.1	e_gw1.3.649.1	e_gw1.3.649.1	scaffold_3:1887027-1888228	4.04221	41.3332	3.35409	1.21208e-11	yes	72628	IPR001568:Ribonuclease T2	sp|Q4WXZ5|RNY1_ASPFU Ribonuclease T2-like OS=Neosartorya fumigata (strain ATCC MYA-4609 / Af293 / CBS 101355 / FGSC A1100) GN=rny1 PE=3 SV=2:318.161	3.1.27.1:Ribonuclease T2.	KOG1642:Ribonuclease, T2 family	endoribonuclease activity:GO:0004521;;RNA binding:GO:0003723;;ribonuclease T2 activity:GO:0033897
fgenesh1_pm.12_#_10	fgenesh1_pm.12_#_10	fgenesh1_pm.12_#_10	scaffold_12:25473-28282	6.87996	66.9791	3.28324	3.70871e-14	yes	130968	IPR013216:Methyltransferase type 11;;IPR001395:Aldo/keto reductase	-	-	-	metabolic process:GO:0008152;;methyltransferase activity:GO:0008168;;oxidoreductase activity:GO:0016491	01.06 lipid, fatty acid and isoprenoid metabolism N.crassa
estExt_Genewise1Plus.C_1_t20052	estExt_Genewise1Plus.C_1_t20052	estExt_Genewise1Plus.C_1_t20052	scaffold_1:705448-707170	1.14612	10.982	3.26032	1.93662e-08	yes
fgenesh1_pg.19_#_164	fgenesh1_pg.19_#_164	fgenesh1_pg.19_#_164	scaffold_19:573337-575630	1.8209	17.0879	3.23025	2.50776e-10	yes	37839	IPR001138:Fungal transcriptional regulatory protein, N-terminal	sp|P52959|CTF1B_FUSSO Cutinase transcription factor 1 beta OS=Fusarium solani subsp. pisi GN=CTF1-BETA PE=2 SV=1:100.138	-	-	regulation of transcription, DNA-dependent:GO:0006355;;nucleus:GO:0005634;;zinc ion binding:GO:0008270;;transcription factor activity:GO:0003700
estExt_Genewise1Plus.C_19_t20059	estExt_Genewise1Plus.C_19_t20059	estExt_Genewise1Plus.C_19_t20059	scaffold_19:641551-643289	1.13368	10.3764	3.19423	1.4988e-07	yes	102517	IPR015289:Alpha-L-arabinofuranosidase B, catalytic;;IPR007934:Alpha-L-arabinofuranosidase B;;IPR008985:Concanavalin A-like lectin/glucanase	sp|Q92455|ABF1_TRIRE Alpha-N-arabinofuranosidase OS=Trichoderma reesei GN=abf1 PE=2 SV=1:1010.36	-	-	alpha-N-arabinofuranosidase activity:GO:0046556;;L-arabinose metabolic process:GO:0046373	01.05 C-compound and carbohydrate metabolism
estExt_Genewise1Plus.C_330027	estExt_Genewise1Plus.C_330027	estExt_Genewise1Plus.C_330027	scaffold_33:28099-29273	4.5827	39.0335	3.09044	6.96751e-10	yes	104464	IPR004853:Protein of unknown function DUF250	sp|Q9UUI8|YIY4_SCHPO Uncharacterized transporter C22F8.04 OS=Schizosaccharomyces pombe (strain ATCC 38366 / 972) GN=SPAC22F8.04 PE=2 SV=1:169.859	-	KOG1442:GDP-fucose transporter	-
fgenesh1_pm.24_#_4	fgenesh1_pm.24_#_4	fgenesh1_pm.24_#_4	scaffold_24:9242-10623	1.14466	9.66699	3.07815	6.92626e-06	yes	133383	IPR011050:Pectin lyase fold/virulence factor;;IPR006626:Parallel beta-helix repeat;;IPR000743:Glycoside hydrolase, family 28	sp|A1D145|PGLR_NEOFI Probable endopolygalacturonase NFIA_008150 OS=Neosartorya fischeri (strain ATCC 1020 / DSM 3700 / FGSC A1164 / NRRL 181) GN=NFIA_008150 PE=3 SV=1:543.117	3.2.1.15:Polygalacturonase.	-	carbohydrate metabolic process:GO:0005975;;polygalacturonase activity:GO:0004650	01.05.02.04 sugar, glucoside, polyol and carboxylate anabolism S.cerevisiae	01.05.02.07 sugar, glucoside, polyol and carboxylate catabolism S.cerevisiae	01.05.03 polysaccharide metabolism	32.10.07 degradation / modification of foreign (exogenous) polysaccharides N.crassa	43.01.03.05 budding, cell polarity and filament formation S.cerevisiae
e_gw1.24.90.1	e_gw1.24.90.1	e_gw1.24.90.1	scaffold_24:394895-396035	4.76134	39.0773	3.03689	1.24937e-09	yes	88640	-	sp|Q5UQ60|YL662_MIMIV Uncharacterized protein L662 OS=Acanthamoeba polyphaga mimivirus GN=MIMI_L662 PE=4 SV=1:84.3445	-	-	-
estExt_Genemark1.C_390038	estExt_Genemark1.C_390038	estExt_Genemark1.C_390038	scaffold_39:127091-128961	7.81781	62.9677	3.00978	1.07705e-10	yes	26932	IPR005828:General substrate transporter;;IPR007114:Major facilitator superfamily;;IPR003663:Sugar transporter;;IPR016196:MFS general substrate transporter	sp|P39932|STL1_YEAST Sugar transporter STL1 OS=Saccharomyces cerevisiae (strain ATCC 204508 / S288c) GN=STL1 PE=1 SV=2:208.379	5.3.1.4:L-arabinose isomerase.	KOG0254:Predicted transporter (major facilitator superfamily)	sugar:hydrogen symporter activity:GO:0005351;;L-arabinose isomerase activity:GO:0008733;;carbohydrate transport:GO:0008643;;transporter activity:GO:0005215;;integral to membrane:GO:0016021;;transport:GO:0006810;;membrane:GO:0016020	01.05 C-compound and carbohydrate metabolism	01.05.25 regulation of C-compound and carbohydrate metabolism N.crassa	20.01.03 C-compound and carbohydrate transport	20.09.18 cellular import	20.09.18.07 non-vesicular cellular import	34.11.12 perception of nutrients and nutritional adaptation N.crassa	20.03 transport facilities
estExt_Genewise1Plus.C_19_t10415	estExt_Genewise1Plus.C_19_t10415	estExt_Genewise1Plus.C_19_t10415	scaffold_19:497791-499362	13.6131	106.939	2.97372	5.16571e-13	yes
fgenesh1_pg.34_#_48	fgenesh1_pg.34_#_48	fgenesh1_pg.34_#_48	scaffold_34:162879-164184	1.28426	9.79927	2.93174	4.25195e-06	yes	39450	IPR007114:Major facilitator superfamily;;IPR011701:Major facilitator superfamily MFS-1;;IPR016196:MFS general substrate transporter	sp|Q08777|MCH5_YEAST Riboflavin transporter MCH5 OS=Saccharomyces cerevisiae (strain ATCC 204508 / S288c) GN=MCH5 PE=1 SV=1:144.821	-	KOG2504:Monocarboxylate transporter	transporter activity:GO:0005215;;integral to membrane:GO:0016021;;transport:GO:0006810	20.01.03 C-compound and carbohydrate transport	20.09.18.07 non-vesicular cellular import	20.03 transport facilities
estExt_Genewise1.C_560005	estExt_Genewise1.C_560005	estExt_Genewise1.C_560005	scaffold_56:2997-3677	10.6271	79.5697	2.90447	1.37217e-08	yes	116900	IPR014005:Extracellular membrane protein, 8-cysteine region, fungi;;IPR008427:Extracellular membrane protein, 8-cysteine region, CFEM	-	-	-	-
gw1.6.545.1	gw1.6.545.1	gw1.6.545.1	scaffold_6:777790-779663	1.18514	8.87252	2.90429	1.38397e-06	yes	50927	IPR003593:AAA+ ATPase, core;;IPR003959:AAA ATPase, core;;IPR003960:AAA ATPase, conserved site;;IPR014851:BCS1 N terminal	sp|Q54DY9|BCS1B_DICDI Probable mitochondrial chaperone BCS1-B OS=Dictyostelium discoideum GN=bcsl1b PE=3 SV=1:176.407	-	KOG0743:AAA+-type ATPase	ATP binding:GO:0005524;;nucleoside-triphosphatase activity:GO:0017111;;nucleotide binding:GO:0000166
e_gw1.22.175.1	e_gw1.22.175.1	e_gw1.22.175.1	scaffold_22:483034-485173	1.17652	8.5758	2.86574	1.38397e-06	yes	88058	IPR002893:Zinc finger, MYND-type	-	-	-	zinc ion binding:GO:0008270
e_gw1.21.414.1	e_gw1.21.414.1	e_gw1.21.414.1	scaffold_21:560956-561790	19.4674	141.855	2.86528	2.97504e-11	yes
e_gw1.5.860.1	e_gw1.5.860.1	e_gw1.5.860.1	scaffold_5:111490-112429	1.39785	9.76073	2.80377	0.000300461	yes
e_gw1.47.56.1	e_gw1.47.56.1	e_gw1.47.56.1	scaffold_47:44729-45988	27.8208	190.959	2.77903	6.02666e-12	yes	93182	IPR008262:Lipase, active site	sp|Q5HZX7|CB043_RAT UPF0554 protein C2orf43 homolog OS=Rattus norvegicus PE=2 SV=1:63.929	-	KOG3975:Uncharacterized conserved protein	catalytic activity:GO:0003824
estExt_Genewise1Plus.C_5_t10307	estExt_Genewise1Plus.C_5_t10307	estExt_Genewise1Plus.C_5_t10307	scaffold_5:355367-357447	20.9649	128.527	2.61602	7.85188e-12	yes	97308	IPR013027:FAD-dependent pyridine nucleotide-disulphide oxidoreductase;;IPR002938:Monooxygenase, FAD-binding;;IPR001327:Pyridine nucleotide-disulphide oxidoreductase, NAD-binding region;;IPR001100:Pyridine nucleotide-disulphide oxidoreductase, class I	sp|Q9FVQ0|YUC10_ARATH Flavin-containing monooxygenase YUCCA10 OS=Arabidopsis thaliana GN=YUC10 PE=2 SV=1:132.494	-	KOG1399:Flavin-containing monooxygenase	aromatic compound metabolic process:GO:0006725;;FAD binding:GO:0050660;;electron transport:GO:0006118;;monooxygenase activity:GO:0004497;;oxidoreductase activity:GO:0016491
estExt_Genemark1.C_220122	estExt_Genemark1.C_220122	estExt_Genemark1.C_220122	scaffold_22:448807-450049	16.8544	102.201	2.60021	3.96877e-10	yes	26328	IPR001395:Aldo/keto reductase	sp|O43488|ARK72_HUMAN Aflatoxin B1 aldehyde reductase member 2 OS=Homo sapiens GN=AKR7A2 PE=1 SV=3:257.299	1.-.-.-:Oxidoreductases.	KOG1575:Voltage-gated shaker-like K+ channel, subunit beta/KCNAB	F420H2 dehydrogenase activity:GO:0043738;;regulation of oxidoreductase activity:GO:0051341;;sulfur oxygenase reductase activity:GO:0043826;;oxidoreductase activity:GO:0016491;;malolactic enzyme activity:GO:0043883	01.05 C-compound and carbohydrate metabolism	01.05.02.07 sugar, glucoside, polyol and carboxylate catabolism	01.20 secondary metabolism	32.07.03 detoxification by modification
estExt_Genewise1Plus.C_15_t10124	estExt_Genewise1Plus.C_15_t10124	estExt_Genewise1Plus.C_15_t10124	scaffold_15:197136-200659	9.79862	59.2901	2.59714	5.29982e-11	yes	101346	IPR001944:Glycoside hydrolase, family 35;;IPR017853:Glycoside hydrolase, catalytic core	sp|A1D1Z9|BGALA_NEOFI Probable beta-galactosidase A OS=Neosartorya fischeri (strain ATCC 1020 / DSM 3700 / FGSC A1164 / NRRL 181) GN=lacA PE=3 SV=1:1201.04	3.2.1.23:Beta-galactosidase.	KOG0496:Beta-galactosidase	beta-galactosidase activity:GO:0004565;;carbohydrate metabolic process:GO:0005975;;beta-galactosidase complex:GO:0009341	01.05 C-compound and carbohydrate metabolism
e_gw1.26.260.1	e_gw1.26.260.1	e_gw1.26.260.1	scaffold_26:4327-6097	1.68097	9.7669	2.5386	1.16195e-05	yes	89619	IPR013105:Tetratricopeptide TPR2;;IPR013026:Tetratricopeptide region	-	-	-	-
fgenesh1_pg.30_#_89	fgenesh1_pg.30_#_89	fgenesh1_pg.30_#_89	scaffold_30:297888-300349	2.88104	16.6687	2.53248	3.71411e-07	yes
e_gw1.7.911.1	e_gw1.7.911.1	e_gw1.7.911.1	scaffold_7:973867-975598	67.536	388.592	2.52453	5.64095e-11	yes	77989	IPR017853:Glycoside hydrolase, catalytic core;;IPR001360:Glycoside hydrolase, family 1	sp|Q25BW4|BGL1B_PHACH Beta-glucosidase 1B OS=Phanerochaete chrysosporium GN=BGL1B PE=1 SV=1:495.738	3.2.1.-:Glycosidases, i.e. enzymes hydrolyzing O- and S-glycosyl	KOG0626:Beta-glucosidase, lactase phlorizinhydrolase, and related proteins	hydrolase activity, hydrolyzing O-glycosyl compounds:GO:0004553;;carbohydrate metabolic process:GO:0005975;;glucosidase activity:GO:0015926;;mannosyl-oligosaccharide mannosidase activity:GO:0015924;;galactosidase activity:GO:0015925;;lytic transglycosylase activity:GO:0008933;;amylase activity:GO:0016160;;hexosaminidase activity:GO:0015929;;fucosidase activity:GO:0015928;;trehalase activity:GO:00…	01.05 C-compound and carbohydrate metabolism	01.05.02.04 sugar, glucoside, polyol and carboxylate anabolism L.innocua	01.05.02.07 sugar, glucoside, polyol and carboxylate catabolism N.crassa	01.05.03 polysaccharide metabolism	01.20.01.07 metabolism of glycosides	02.01 glycolysis and gluconeogenesis	32.05.03 defense related proteins
e_gw1.32.10.1	e_gw1.32.10.1	e_gw1.32.10.1	scaffold_32:105537-106081	44.2906	251.398	2.5049	4.91962e-08	yes
gm1.8861_g	gm1.8861_g	gm1.8861_g	scaffold_50:53981-55797	5.14571	28.6534	2.47726	1.73356e-07	yes	13305	IPR007114:Major facilitator superfamily;;IPR011701:Major facilitator superfamily MFS-1;;IPR016196:MFS general substrate transporter	sp|Q08902|YO378_YEAST Drug resistance protein YOR378W OS=Saccharomyces cerevisiae (strain ATCC 204508 / S288c) GN=YOR378W PE=1 SV=1:127.102	-	KOG0254:Predicted transporter (major facilitator superfamily)	transporter activity:GO:0005215;;integral to membrane:GO:0016021;;transport:GO:0006810
e_gw1.8.863.1	e_gw1.8.863.1	e_gw1.8.863.1	scaffold_8:567107-567953	4.93823	27.1871	2.46086	2.20327e-05	yes	78863	IPR011576:Pyridoxamine 5'-phosphate oxidase-related, FMN-binding core;;IPR009002:FMN-binding split barrel, related	-	-	-	FMN binding:GO:0010181
estExt_fgenesh1_pm.C_40220	estExt_fgenesh1_pm.C_40220	estExt_fgenesh1_pm.C_40220	scaffold_4:771661-772355	4.01257	21.7045	2.43539	0.000294572	yes
estExt_fgenesh1_pm.C_60423	estExt_fgenesh1_pm.C_60423	estExt_fgenesh1_pm.C_60423	scaffold_6:1310268-1311281	17.2319	90.9235	2.39957	3.48807e-08	yes
estExt_Genemark1.C_490008	estExt_Genemark1.C_490008	estExt_Genemark1.C_490008	scaffold_49:26097-26874	4.82527	24.7785	2.36041	0.000488505	yes	27045	IPR002110:Ankyrin	-	-	-	-
gm1.6951_g	gm1.6951_g	gm1.6951_g	scaffold_21:288614-289381	11.4521	57.7338	2.33381	1.16182e-05	yes	11395	IPR001214:SET;;IPR003616:Post-SET zinc-binding region	-	-	-	nucleus:GO:0005634
e_gw1.7.224.1	e_gw1.7.224.1	e_gw1.7.224.1	scaffold_7:138103-139165	1.75939	8.68239	2.30302	0.0017899	yes	77674	IPR006913:Glutathione-dependent formaldehyde-activating, GFA	-	-	KOG4192:Uncharacterized conserved protein	metabolic process:GO:0008152;;carbon-sulfur lyase activity:GO:0016846
e_gw1.30.297.1	e_gw1.30.297.1	e_gw1.30.297.1	scaffold_30:343337-344267	2.50951	12.2916	2.29219	0.000449789	yes	90707	IPR002409:Aflatoxin biosynthesis regulatory protein;;IPR001138:Fungal transcriptional regulatory protein, N-terminal	sp|P52957|AFLR_EMENI Sterigmatocystin biosynthesis regulatory protein OS=Emericella nidulans GN=aflR PE=3 SV=2:59.3066	-	KOG4057:Uncharacterized conserved protein	regulation of transcription, DNA-dependent:GO:0006355;;nucleus:GO:0005634;;zinc ion binding:GO:0008270;;transcription factor activity:GO:0003700
estExt_Genewise1.C_3_t40101	estExt_Genewise1.C_3_t40101	estExt_Genewise1.C_3_t40101	scaffold_3:1864460-1864977	333.904	1590.26	2.25176	6.97878e-08	yes
estExt_fgenesh2_kg.C_1_t10451	estExt_fgenesh2_kg.C_1_t10451	estExt_fgenesh2_kg.C_1_t10451	scaffold_1:3185401-3186746	5.87733	27.8479	2.24434	1.44111e-05	yes	121828	IPR016040:NAD(P)-binding;;IPR008030:NmrA-like	sp|Q5ZID0|NMRL1_CHICK NmrA-like family domain-containing protein 1 OS=Gallus gallus GN=NMRAL1 PE=2 SV=1:146.747	-	-	metabolic process:GO:0008152;;regulation of nitrogen utilization:GO:0006808;;catalytic activity:GO:0003824;;binding:GO:0005488;;transcription repressor activity:GO:0016564	01.02.07.01 regulation of nitrogen metabolism	11.02.03.04.03 transcription repression
fgenesh1_pm.5_#_181	fgenesh1_pm.5_#_181	fgenesh1_pm.5_#_181	scaffold_5:627828-628873	5.64151	26.5616	2.23519	4.18733e-05	yes	128643	IPR016040:NAD(P)-binding;;IPR002347:Glucose/ribitol dehydrogenase;;IPR002198:Short-chain dehydrogenase/reductase SDR	sp|P70684|PGDH_CAVPO 15-hydroxyprostaglandin dehydrogenase [NAD+] OS=Cavia porcellus GN=HPGD PE=2 SV=1:88.5817	1.1.1.141:15-hydroxyprostaglandin dehydrogenase (NAD+).	KOG4169:15-hydroxyprostaglandin dehydrogenase and related dehydrogenases	metabolic process:GO:0008152;;catalytic activity:GO:0003824;;binding:GO:0005488;;oxidoreductase activity:GO:0016491;;15-hydroxyprostaglandin dehydrogenase (NAD+) activity:GO:0016404
estExt_fgenesh1_pm.C_50003	estExt_fgenesh1_pm.C_50003	estExt_fgenesh1_pm.C_50003	scaffold_5:4356-5700	3.10433	14.2428	2.19788	0.000176699	yes
e_gw1.6.1049.1	e_gw1.6.1049.1	e_gw1.6.1049.1	scaffold_6:1312069-1313803	21.3182	97.3869	2.19164	3.27777e-08	yes	76604	IPR007114:Major facilitator superfamily;;IPR011701:Major facilitator superfamily MFS-1;;IPR016196:MFS general substrate transporter	sp|O13714|YDZ7_SCHPO Uncharacterized membrane protein C14C4.07 OS=Schizosaccharomyces pombe (strain ATCC 38366 / 972) GN=SPAC14C4.07 PE=1 SV=1:60.4622	-	KOG2816:Predicted transporter ADD1 (major facilitator superfamily)	transporter activity:GO:0005215;;integral to membrane:GO:0016021;;transport:GO:0006810
estExt_fgenesh1_pg.C_150103	estExt_fgenesh1_pg.C_150103	estExt_fgenesh1_pg.C_150103	scaffold_15:417439-420751	19.5643	87.1017	2.15448	5.60738e-08	yes	142123	IPR017853:Glycoside hydrolase, catalytic core;;IPR001223:Glycoside hydrolase, family 18, catalytic domain;;IPR001579:Glycoside hydrolase, chitinase active site	sp|Q1EAR5|CHI2_COCIM Endochitinase 2 OS=Coccidioides immitis (strain RS) GN=CTS2 PE=3 SV=2:181.8	3.2.1.14:Chitinase.	KOG4701:Chitinase	endochitinase activity:GO:0008843;;hydrolase activity, hydrolyzing O-glycosyl compounds:GO:0004553;;carbohydrate metabolic process:GO:0005975;;chitinase activity:GO:0004568
estExt_fgenesh2_kg.C_30095	estExt_fgenesh2_kg.C_30095	estExt_fgenesh2_kg.C_30095	scaffold_3:767061-767551	13.7919	61.1884	2.14943	0.000189937	yes	122372	IPR002052:N-6 adenine-specific DNA methylase, conserved site	-	-	-	nucleic acid binding:GO:0003676;;methylation:GO:0032259;;methyltransferase activity:GO:0008168
estExt_Genemark1.C_3_t10393	estExt_Genemark1.C_3_t10393	estExt_Genemark1.C_3_t10393	scaffold_3:1403205-1404842	4.88304	21.5821	2.14398	2.48165e-05	yes	24069	IPR008979:Galactose-binding like	-	-	KOG1216:von Willebrand factor and related coagulation proteins	-
estExt_fgenesh2_kg.C_130031	estExt_fgenesh2_kg.C_130031	estExt_fgenesh2_kg.C_130031	scaffold_13:335353-336833	12.2383	52.3278	2.09618	5.84505e-06	yes	123870	IPR016040:NAD(P)-binding;;IPR013154:Alcohol dehydrogenase GroES-like;;IPR013149:Alcohol dehydrogenase, zinc-binding;;IPR011032:GroES-like	sp|Q64442|DHSO_MOUSE Sorbitol dehydrogenase OS=Mus musculus GN=Sord PE=1 SV=3:286.189	1.1.1.14:L-iditol 2-dehydrogenase.	KOG0024:Sorbitol dehydrogenase	metabolic process:GO:0008152;;catalytic activity:GO:0003824;;binding:GO:0005488;;L-iditol 2-dehydrogenase activity:GO:0003939	01.05 C-compound and carbohydrate metabolism	01.05.02 sugar, glucoside, polyol and carboxylate metabolism	01.05.02.04 sugar, glucoside, polyol and carboxylate anabolism S.cerevisiae	01.05.02.07 sugar, glucoside, polyol and carboxylate catabolism S.cerevisiae	01.07 metabolism of vitamins, cofactors, and prosthetic groups	01.20.01.01 metabolism of secondary monosaccharides S.cerevisiae	16.17 metal binding	16.17.09 heavy metal binding (Cu, Fe, Zn)	16.21.07 NAD/NADP binding
estExt_Genewise1Plus.C_18_t10409	estExt_Genewise1Plus.C_18_t10409	estExt_Genewise1Plus.C_18_t10409	scaffold_18:537556-539854	4.54838	19.3816	2.09126	0.00122265	yes
estExt_Genewise1Plus.C_14_t20043	estExt_Genewise1Plus.C_14_t20043	estExt_Genewise1Plus.C_14_t20043	scaffold_14:698569-700828	55.509	232.079	2.06382	9.47192e-08	yes	101246	IPR005828:General substrate transporter;;IPR007114:Major facilitator superfamily;;IPR003663:Sugar transporter;;IPR016196:MFS general substrate transporter;;IPR005829:Sugar transporter, conserved site	sp|Q9XIH7|PLT1_ARATH Putative polyol transporter 1 OS=Arabidopsis thaliana GN=PLT1 PE=2 SV=1:187.963	5.3.1.4:L-arabinose isomerase.	KOG0254:Predicted transporter (major facilitator superfamily)	sugar:hydrogen symporter activity:GO:0005351;;L-arabinose isomerase activity:GO:0008733;;carbohydrate transport:GO:0008643;;transporter activity:GO:0005215;;integral to membrane:GO:0016021;;transport:GO:0006810;;membrane:GO:0016020	01.05 C-compound and carbohydrate metabolism	01.06 lipid, fatty acid and isoprenoid metabolism N.crassa	20.01.03 C-compound and carbohydrate transport	20.01.13 lipid/fatty acid transport	20.09.16 cellular export and secretion	20.09.18 cellular import	20.09.18.07 non-vesicular cellular import	20.03 transport facilities
fgenesh1_pm.7_#_187	fgenesh1_pm.7_#_187	fgenesh1_pm.7_#_187	scaffold_7:604696-605715	20.2012	83.3752	2.04517	2.91613e-05	yes	129514	IPR000425:Major intrinsic protein	sp|P0CD92|AQY1_YEASX Aquaporin-1 OS=Saccharomyces cerevisiae GN=AQY1 PE=2 SV=1:164.466	-	KOG0223:Aquaporin (major intrinsic protein family)	transporter activity:GO:0005215;;transport:GO:0006810;;membrane:GO:0016020	20.09.18.07 non-vesicular cellular import	20.03 transport facilities	20.03.01 channel / pore class transport	20.03.01.01 ion channels
estExt_Genewise1Plus.C_8_t10207	estExt_Genewise1Plus.C_8_t10207	estExt_Genewise1Plus.C_8_t10207	scaffold_8:254350-257159	3.49887	14.2405	2.02504	3.27955e-05	yes	98815	IPR010730:Heterokaryon incompatibility	-	-	-	-
e_gw1.18.221.1	e_gw1.18.221.1	e_gw1.18.221.1	scaffold_18:92727-93659	7.06179	27.9231	1.98335	0.00814737	yes	86104	IPR001129:Membrane-associated proteins in eicosanoid and glutathione metabolism (MAPEG)	sp|Q3T100|MGST3_BOVIN Microsomal glutathione S-transferase 3 OS=Bos taurus GN=MGST3 PE=2 SV=1:74.3294	2.5.1.18:Glutathione transferase.	-	glutathione transferase activity:GO:0004364	32.01 stress response	32.07.07.03 glutathione conjugation reaction
estExt_Genewise1Plus.C_7_t20161	estExt_Genewise1Plus.C_7_t20161	estExt_Genewise1Plus.C_7_t20161	scaffold_7:822494-824456	3.08634	12.129	1.9745	0.00060038	yes	98410	IPR005828:General substrate transporter;;IPR007114:Major facilitator superfamily;;IPR004738:Phosphate permease;;IPR016196:MFS general substrate transporter;;IPR005829:Sugar transporter, conserved site	sp|P25297|PHO84_YEAST Inorganic phosphate transporter PHO84 OS=Saccharomyces cerevisiae (strain ATCC 204508 / S288c) GN=PHO84 PE=1 SV=2:594.349	-	KOG0252:Inorganic phosphate transporter	phosphate transport:GO:0006817;;transporter activity:GO:0005215;;inorganic phosphate transmembrane transporter activity:GO:0005315;;integral to membrane:GO:0016021;;transport:GO:0006810;;membrane:GO:0016020	01.04 phosphate metabolism	20.01.01.01.01 heavy metal ion transport (Cu+, Fe3+, etc.) S.cerevisiae	20.01.01.07 anion transport	20.01.01.07.07 phosphate transport	20.01.03 C-compound and carbohydrate transport	20.09.18 cellular import	34.01.01.03 homeostasis of protons	34.01.03.03 homeostasis of phosphate	20.03 transport facilities
estExt_Genewise1Plus.C_2_t20447	estExt_Genewise1Plus.C_2_t20447	estExt_Genewise1Plus.C_2_t20447	scaffold_2:1193837-1194669	19.8138	77.8222	1.97367	4.31856e-05	yes	95516	IPR016181:Acyl-CoA N-acyltransferase;;IPR000182:GCN5-related N-acetyltransferase	-	-	-	metabolic process:GO:0008152;;N-acetyltransferase activity:GO:0008080
gm1.3544_g	gm1.3544_g	gm1.3544_g	scaffold_7:222987-224261	4.82304	18.8571	1.9671	0.000419398	yes	7988	IPR002629:Methionine synthase, vitamin-B12 independent	sp|P42319|YXJH_BACSU Uncharacterized protein yxjH OS=Bacillus subtilis GN=yxjH PE=4 SV=4:239.965	-	-	methionine biosynthetic process:GO:0009086;;5-methyltetrahydropteroyltriglutamate-homocysteine S-methyltransferase activity:GO:0003871	01.01.06.05.01 biosynthesis of methionine	14.07.09 posttranslational modification of amino acids (e.g. hydroxylation, methylation) L.innocua
e_gw1.9.658.1	e_gw1.9.658.1	e_gw1.9.658.1	scaffold_9:788237-789624	5.48605	21.0974	1.94322	0.000248378	yes	80113	IPR005338:Protein of unknown function UPF0075	sp|Q8RD30|ANMK_THETN Anhydro-N-acetylmuramic acid kinase OS=Thermoanaerobacter tengcongensis GN=anmK PE=3 SV=1:268.855	-	-	-
fgenesh2_kg.2_#_203_#_gi|30121670|gb|CB907012.1|CB907012	fgenesh2_kg.2_#_203_#_gi|30121670|gb|CB907012.1|CB907012	fgenesh2_kg.2_#_203_#_gi|30121670|gb|CB907012.1|CB907012	scaffold_2:1354579-1355051	54.5722	207.715	1.92837	2.98979e-05	yes
estExt_fgenesh1_pg.C_80088	estExt_fgenesh1_pg.C_80088	estExt_fgenesh1_pg.C_80088	scaffold_8:337199-340133	182.244	684.663	1.90952	0.000380667	yes	141274	IPR000542:Acyltransferase ChoActase/COT/CPT	sp|P80235|CACM_YEAST Putative mitochondrial carnitine O-acetyltransferase OS=Saccharomyces cerevisiae (strain ATCC 204508 / S288c) GN=YAT1 PE=1 SV=2:525.783	2.3.1.7:Carnitine O-acetyltransferase.	KOG3719:Carnitine O-acyltransferase CPT2/YAT1	acyltransferase activity:GO:0008415;;carnitine O-acetyltransferase activity:GO:0004092	01.01 amino acid metabolism	01.05 C-compound and carbohydrate metabolism	01.20.17.01 metabolism of nonprotein amino acids	20.01.03 C-compound and carbohydrate transport	20.01.13 lipid/fatty acid transport	20.09.04 mitochondrial transport	20.03 transport facilities
fgenesh1_pm.12_#_226	fgenesh1_pm.12_#_226	fgenesh1_pm.12_#_226	scaffold_12:854614-854992	98.1033	360.436	1.87737	7.23469e-05	yes
gw1.21.443.1	gw1.21.443.1	gw1.21.443.1	scaffold_21:505074-507047	6.00703	21.8899	1.86555	0.000176699	yes	66301	IPR007114:Major facilitator superfamily;;IPR011701:Major facilitator superfamily MFS-1;;IPR016196:MFS general substrate transporter	sp|Q04301|VBA1_YEAST Vacuolar basic amino acid transporter 1 OS=Saccharomyces cerevisiae (strain ATCC 204508 / S288c) GN=VBA1 PE=1 SV=1:109.768	-	KOG0254:Predicted transporter (major facilitator superfamily)	transporter activity:GO:0005215;;integral to membrane:GO:0016021;;transport:GO:0006810
gm1.2221_g	gm1.2221_g	gm1.2221_g	scaffold_3:1749833-1750526	39.5779	144.18	1.8651	4.1114e-05	yes	6665	-	-	-	KOG0118:FOG: RRM domain	-
estExt_Genewise1Plus.C_4_t30114	estExt_Genewise1Plus.C_4_t30114	estExt_Genewise1Plus.C_4_t30114	scaffold_4:1383977-1385160	112.37	409.156	1.86439	1.16195e-05	yes	97186	IPR006379:HAD-superfamily hydrolase, subfamily IIB;;IPR005002:Eukaryotic phosphomannomutase	sp|Q9UTJ2|PMM_SCHPO Phosphomannomutase OS=Schizosaccharomyces pombe (strain ATCC 38366 / 972) GN=pmm1 PE=2 SV=1:367.851	5.4.2.8:Phosphomannomutase.	KOG3189:Phosphomannomutase	cytoplasm:GO:0005737;;metabolic process:GO:0008152;;catalytic activity:GO:0003824;;mannose biosynthetic process:GO:0019307;;phosphomannomutase activity:GO:0004615	01.05 C-compound and carbohydrate metabolism	01.05.02 sugar, glucoside, polyol and carboxylate metabolism	01.05.02.01 nucleotide-sugar metabolism	01.05.02.04 sugar, glucoside, polyol and carboxylate anabolism S.cerevisiae	01.05.02.07 sugar, glucoside, polyol and carboxylate catabolism S.cerevisiae	14.04 protein targeting, sorting and translocation S.cerevisiae	14.07 protein modification	14.07.02.02 N-directed glycosylation, deglycosylation	20.01.10 protein transport
gw1.19.460.1	gw1.19.460.1	gw1.19.460.1	scaffold_19:128762-129683	4.07023	14.7842	1.86087	0.00463079	yes
fgenesh1_pm.2_#_440	fgenesh1_pm.2_#_440	fgenesh1_pm.2_#_440	scaffold_2:1504383-1505857	204.002	729.265	1.83786	3.42994e-05	yes	127115	IPR017853:Glycoside hydrolase, catalytic core;;IPR001360:Glycoside hydrolase, family 1	sp|Q25BW4|BGL1B_PHACH Beta-glucosidase 1B OS=Phanerochaete chrysosporium GN=BGL1B PE=1 SV=1:500.745	3.2.1.21:Beta-glucosidase.	KOG0626:Beta-glucosidase, lactase phlorizinhydrolase, and related proteins	hydrolase activity, hydrolyzing O-glycosyl compounds:GO:0004553;;carbohydrate metabolic process:GO:0005975;;beta-glucosidase activity:GO:0008422	01.05 C-compound and carbohydrate metabolism	01.05.02.04 sugar, glucoside, polyol and carboxylate anabolism L.innocua	01.05.02.07 sugar, glucoside, polyol and carboxylate catabolism N.crassa	01.05.03 polysaccharide metabolism	01.20.01.07 metabolism of glycosides	02.01 glycolysis and gluconeogenesis	32.05.03 defense related proteins
e_gw1.39.76.1	e_gw1.39.76.1	e_gw1.39.76.1	scaffold_39:55764-57434	2.55781	9.08733	1.82895	0.00330869	yes	92448	IPR001138:Fungal transcriptional regulatory protein, N-terminal	-	-	-	regulation of transcription, DNA-dependent:GO:0006355;;nucleus:GO:0005634;;zinc ion binding:GO:0008270;;transcription factor activity:GO:0003700
gm1.128_g	gm1.128_g	gm1.128_g	scaffold_1:473976-476553	3.03415	10.5373	1.79614	0.000614839	yes	4572	IPR017442:Serine/threonine protein kinase-related;;IPR000719:Protein kinase, core;;IPR002290:Serine/threonine protein kinase;;IPR011009:Protein kinase-like;;IPR008973:C2 calcium/lipid-binding region, CaLB;;IPR001245:Tyrosine protein kinase;;IPR002110:Ankyrin	sp|Q9P7J8|GAD8_SCHPO Serine/threonine-protein kinase gad8 OS=Schizosaccharomyces pombe (strain ATCC 38366 / 972) GN=gad8 PE=1 SV=1:249.595	-	KOG0598:Ribosomal protein S6 kinase and related proteins	protein-tyrosine kinase activity:GO:0004713;;ATP binding:GO:0005524;;protein kinase activity:GO:0004672;;protein serine/threonine kinase activity:GO:0004674;;protein amino acid phosphorylation:GO:0006468
fgenesh2_kg.49_#_1_#_gi|30124184|gb|CB909523.1|CB909523	fgenesh2_kg.49_#_1_#_gi|30124184|gb|CB909523.1|CB909523	fgenesh2_kg.49_#_1_#_gi|30124184|gb|CB909523.1|CB909523	scaffold_49:27034-27623	7.54183	25.7217	1.77	0.00769514	yes	121362	IPR002110:Ankyrin	sp|Q5DW34|EHMT1_MOUSE Histone-lysine N-methyltransferase EHMT1 OS=Mus musculus GN=Ehmt1 PE=1 SV=2:61.2326;;sp|Q5DW34|EHMT1_MOUSE Histone-lysine N-methyltransferase EHMT1 OS=Mus musculus GN=Ehmt1 PE=1 SV=2:54.6842;;sp|Q5DW34|EHMT1_MOUSE Histone-lysine N-methyltransferase EHMT1 OS=Mus musculus GN=Ehmt1 PE=1 SV=2:93.2041	-	KOG4177:Ankyrin	-
estExt_fgenesh1_pg.C_300010	estExt_fgenesh1_pg.C_300010	estExt_fgenesh1_pg.C_300010	scaffold_30:29237-30495	26.1148	88.6735	1.76364	7.2347e-05	yes	143037	IPR011009:Protein kinase-like	-	-	-	-
estExt_Genewise1.C_350065	estExt_Genewise1.C_350065	estExt_Genewise1.C_350065	scaffold_35:83599-84968	38.413	128.41	1.74109	2.83191e-05	yes	116206	IPR003042:Aromatic-ring hydroxylase;;IPR006076:FAD dependent oxidoreductase	sp|Q11058|Y1260_MYCTU Uncharacterized protein Rv1260/MT1298 OS=Mycobacterium tuberculosis GN=Rv1260 PE=4 SV=1:140.584	-	KOG2614:Kynurenine 3-monooxygenase and related flavoprotein monooxygenases	metabolic process:GO:0008152;;oxidoreductase activity:GO:0016491
gw1.14.276.1	gw1.14.276.1	gw1.14.276.1	scaffold_14:57960-59076	10.9988	36.3033	1.72275	0.000742204	yes	51374	IPR006353:HAD-superfamily hydrolase, subfamily IIA, CECR5;;IPR006357:HAD-superfamily hydrolase, subfamily IIA	sp|O13899|YF38_SCHPO Uncharacterized CDP-alcohol phosphatidyltransferase class-I family protein C22A12.08c OS=Schizosaccharomyces pombe (strain ATCC 38366 / 972) GN=SPAC22A12.08c PE=2 SV=1:221.861	-	KOG1618:Predicted phosphatase	metabolic process:GO:0008152;;hydrolase activity:GO:0016787
gm1.158_g	gm1.158_g	gm1.158_g	scaffold_1:584639-585882	33.0158	108.374	1.7148	0.000110351	yes	4602	IPR016040:NAD(P)-binding;;IPR002347:Glucose/ribitol dehydrogenase;;IPR002198:Short-chain dehydrogenase/reductase SDR	sp|Q8NK50|DCXR_TRIRE L-xylulose reductase OS=Trichoderma reesei GN=lxr1 PE=2 SV=1:231.491	1.1.1.184:Carbonyl reductase (NADPH).	KOG0725:Reductases with broad range of substrate specificities	metabolic process:GO:0008152;;carbonyl reductase (NADPH) activity:GO:0004090;;catalytic activity:GO:0003824;;binding:GO:0005488;;oxidoreductase activity:GO:0016491	01.05 C-compound and carbohydrate metabolism	01.05.02.04 sugar, glucoside, polyol and carboxylate anabolism N.crassa	01.05.02.07 sugar, glucoside, polyol and carboxylate catabolism N.crassa	01.05.08.07 C-4 compound catabolism	01.06 lipid, fatty acid and isoprenoid metabolism L.monocytogenes	01.06.02.02 glycolipid metabolism	01.06.05 fatty acid metabolism	01.07 metabolism of vitamins, cofactors, and prosthetic groups	01.20 secondary metabolism	01.20.01.05 metabolism of sugar alcohols	01.20.35.01.01 metabolism of melanins	02.07 pentose-phosphate pathway	20.01.15 electron transport	16.01 protein binding	16.21.07 NAD/NADP binding
e_gw1.15.234.1	e_gw1.15.234.1	e_gw1.15.234.1	scaffold_15:736496-739043	3.22041	10.3887	1.68971	0.00152781	yes	84065	IPR006151:Quinate/shikimate 5-dehydrogenase/glutamyl-tRNA reductase;;IPR016040:NAD(P)-binding;;IPR013708:Shikimate dehydrogenase substrate binding, N-terminal;;IPR001381:Dehydroquinase class I;;IPR000623:Shikimate kinase	sp|P11637|QUTR_NEUCR Quinate repressor protein OS=Neurospora crassa GN=qa-1s PE=3 SV=2:814.298	-	KOG0692:Pentafunctional AROM protein	cytoplasm:GO:0005737;;metabolic process:GO:0008152;;ATP binding:GO:0005524;;3-dehydroquinate dehydratase activity:GO:0003855;;catalytic activity:GO:0003824;;shikimate kinase activity:GO:0004765;;aromatic amino acid family biosynthetic process:GO:0009073;;binding:GO:0005488;;shikimate 5-dehydrogenase activity:GO:0004764	11.02.03.04.03 transcription repression
estExt_fgenesh2_kg.C_250036	estExt_fgenesh2_kg.C_250036	estExt_fgenesh2_kg.C_250036	scaffold_25:222271-222969	7.7029	24.6196	1.67634	0.00895205	yes
estExt_fgenesh2_kg.C_160108	estExt_fgenesh2_kg.C_160108	estExt_fgenesh2_kg.C_160108	scaffold_16:596415-596926	28.8523	91.7297	1.6687	0.00180029	yes
fgenesh1_pg.5_#_1	fgenesh1_pg.5_#_1	fgenesh1_pg.5_#_1	scaffold_5:199-1829	3.00824	9.41524	1.64608	0.00987472	yes	34062	-	sp|Q06466|VP62L_YEAST Putative vacuolar protein sorting-associated protein YPR157W OS=Saccharomyces cerevisiae (strain ATCC 204508 / S288c) GN=YPR157W PE=2 SV=1:160.229	-	-	-
fgenesh1_pm.2_#_194	fgenesh1_pm.2_#_194	fgenesh1_pm.2_#_194	scaffold_2:672087-673579	7.92353	24.5969	1.63426	0.00150801	yes	126869	IPR005198:Glycoside hydrolase, family 76;;IPR008928:Six-hairpin glycosidase-like;;IPR014480:Mannan endo-1,6-alpha-mannosidase	sp|P36091|DCW1_YEAST Mannan endo-1,6-alpha-mannosidase DCW1 OS=Saccharomyces cerevisiae (strain ATCC 204508 / S288c) GN=DCW1 PE=1 SV=1:325.865	3.2.1.101:Mannan endo-1,6-beta-mannosidase.	-	mannan endo-1,6-alpha-mannosidase activity:GO:0008496;;catalytic activity:GO:0003824	40.01 cell growth / morphogenesis	40.01.03 directional cell growth (morphogenesis) N.crassa	42.01 cell wall	42.04 cytoskeleton/structural proteins	43.01.03 fungal and other eukaryotic cell type differentiation N.crassa	43.01.03.05 budding, cell polarity and filament formation N.crassa
e_gw1.39.35.1	e_gw1.39.35.1	e_gw1.39.35.1	scaffold_39:5917-7402	3.19345	9.91217	1.63408	0.00862332	yes
estExt_Genewise1Plus.C_15_t20071	estExt_Genewise1Plus.C_15_t20071	estExt_Genewise1Plus.C_15_t20071	scaffold_15:742156-743975	8.00495	24.5763	1.6183	0.00107354	yes	101532	IPR005828:General substrate transporter;;IPR007114:Major facilitator superfamily;;IPR003663:Sugar transporter;;IPR016196:MFS general substrate transporter;;IPR005829:Sugar transporter, conserved site	sp|Q4U3U4|QAY_NEUTR Quinate permease OS=Neurospora terricola GN=qa-y PE=3 SV=1:825.469	5.3.1.4:L-arabinose isomerase.	KOG0254:Predicted transporter (major facilitator superfamily)	sugar:hydrogen symporter activity:GO:0005351;;L-arabinose isomerase activity:GO:0008733;;carbohydrate transport:GO:0008643;;transporter activity:GO:0005215;;integral to membrane:GO:0016021;;transport:GO:0006810;;membrane:GO:0016020	20.01.03 C-compound and carbohydrate transport	20.09.18.07 non-vesicular cellular import
estExt_fgenesh2_kg.C_170050	estExt_fgenesh2_kg.C_170050	estExt_fgenesh2_kg.C_170050	scaffold_17:717679-719122	74.7435	226.209	1.59764	0.000150537	yes	124330	IPR005321:Peptidase S58, DmpA;;IPR016117:Peptidase S58 DmpA/arginine biosynthesis protein ArgJ	-	3.4.11.19:D-stereospecific aminopeptidase.	-	-
estExt_fgenesh1_pm.C_60043	estExt_fgenesh1_pm.C_60043	estExt_fgenesh1_pm.C_60043	scaffold_6:121526-123279	56.927	170.177	1.57985	0.000249584	yes	136711	IPR007114:Major facilitator superfamily;;IPR011701:Major facilitator superfamily MFS-1;;IPR016196:MFS general substrate transporter	sp|Q9P6J0|YHDC_SCHPO Uncharacterized transporter C1683.12 OS=Schizosaccharomyces pombe (strain ATCC 38366 / 972) GN=SPBC1683.12 PE=2 SV=1:172.555	-	KOG2533:Permease of the major facilitator superfamily	transporter activity:GO:0005215;;integral to membrane:GO:0016021;;transport:GO:0006810	20.01.03 C-compound and carbohydrate transport	20.01.23 allantoin and allantoate transport	20.01.25 vitamine/cofactor transport	20.09.18.07 non-vesicular cellular import	20.03 transport facilities
gw1.25.299.1	gw1.25.299.1	gw1.25.299.1	scaffold_25:271249-271639	189.071	561.38	1.57005	0.00540103	yes	65989	IPR009053:Prefoldin;;IPR002777:Prefoldin beta-like	sp|P52553|PFD6_YEAST Prefoldin subunit 6 OS=Saccharomyces cerevisiae (strain ATCC 204508 / S288c) GN=YKE2 PE=1 SV=1:73.1738	-	KOG3478:Prefoldin subunit 6, KE2 family	unfolded protein binding:GO:0051082;;protein folding:GO:0006457;;prefoldin complex:GO:0016272	14.01 protein folding and stabilization	42.04 cytoskeleton/structural proteins	42.04.03 actin cytoskeleton	42.04.05 microtubule cytoskeleton	16.01 protein binding
estExt_fgenesh1_pg.C_250006	estExt_fgenesh1_pg.C_250006	estExt_fgenesh1_pg.C_250006	scaffold_25:20201-20978	106.437	305.433	1.52086	0.000140999	yes
gw1.26.185.1	gw1.26.185.1	gw1.26.185.1	scaffold_26:268480-269764	10.2061	29.1534	1.51423	0.00582578	yes
gm1.3367_g	gm1.3367_g	gm1.3367_g	scaffold_6:1047668-1050084	42.2366	118.196	1.48462	0.000164876	yes	7811	IPR005828:General substrate transporter;;IPR007114:Major facilitator superfamily;;IPR003663:Sugar transporter;;IPR016196:MFS general substrate transporter;;IPR005829:Sugar transporter, conserved site	sp|A2QQV6|QUTD_ASPNC Probable quinate permease OS=Aspergillus niger (strain CBS 513.88 / FGSC A1513) GN=qutD PE=3 SV=1:309.686	5.3.1.4:L-arabinose isomerase.	KOG0254:Predicted transporter (major facilitator superfamily)	sugar:hydrogen symporter activity:GO:0005351;;L-arabinose isomerase activity:GO:0008733;;carbohydrate transport:GO:0008643;;transporter activity:GO:0005215;;integral to membrane:GO:0016021;;transport:GO:0006810;;membrane:GO:0016020	01.05.25 regulation of C-compound and carbohydrate metabolism N.crassa	20.01.03 C-compound and carbohydrate transport	20.09.18 cellular import	20.09.18.07 non-vesicular cellular import	34.11.12 perception of nutrients and nutritional adaptation N.crassa	20.03 transport facilities
e_gw1.11.769.1	e_gw1.11.769.1	e_gw1.11.769.1	scaffold_11:965128-967181	90.8481	252.191	1.47299	0.000352942	yes	81353	IPR000504:RNA recognition motif, RNP-1;;IPR007275:YT521-B-like protein	sp|Q5R746|YTDC2_PONAB YTH domain-containing protein 2 OS=Pongo abelii GN=YTHDC2 PE=2 SV=1:69.3218;;sp|Q5R746|YTDC2_PONAB YTH domain-containing protein 2 OS=Pongo abelii GN=YTHDC2 PE=2 SV=1:64.6994	-	KOG1902:Putative signal transduction protein involved in RNA splicing	nucleic acid binding:GO:0003676
fgenesh2_kg.5_#_147_#_gi|38136185|gb|CF881503.1|CF881503	fgenesh2_kg.5_#_147_#_gi|38136185|gb|CF881503.1|CF881503	fgenesh2_kg.5_#_147_#_gi|38136185|gb|CF881503.1|CF881503	scaffold_5:1366780-1367741	1114.09	3075.36	1.46489	0.000801107	yes
gw1.6.1080.1	gw1.6.1080.1	gw1.6.1080.1	scaffold_6:314495-315606	59.218	162.873	1.45964	0.000438884	yes	62461	IPR000326:Phosphatidic acid phosphatase type 2/haloperoxidase	sp|Q9ZU49|LPP1_ARATH Lipid phosphate phosphatase 1 OS=Arabidopsis thaliana GN=LPP1 PE=2 SV=2:127.102	3.1.3.4:Phosphatidate phosphatase.	KOG3030:Lipid phosphate phosphatase and related enzymes of the PAP2 family	phosphatidate phosphatase activity:GO:0008195;;catalytic activity:GO:0003824;;membrane:GO:0016020	01.06.10 regulation of lipid, fatty acid and isoprenoid metabolism N.crassa
e_gw1.18.41.1	e_gw1.18.41.1	e_gw1.18.41.1	scaffold_18:646791-647178	271.189	743.041	1.45414	0.000602806	yes
e_gw1.3.1501.1	e_gw1.3.1501.1	e_gw1.3.1501.1	scaffold_3:1748250-1748955	23.8558	65.2692	1.45206	0.00736529	yes
estExt_Genewise1Plus.C_8_t10451	estExt_Genewise1Plus.C_8_t10451	estExt_Genewise1Plus.C_8_t10451	scaffold_8:584779-586391	40.8121	110.837	1.44137	0.00036452	yes	98936	IPR004886:Glycolipid anchored surface protein GAS1;;IPR017853:Glycoside hydrolase, catalytic core	sp|P56092|EPD1_CANMA Protein EPD1 OS=Candida maltosa GN=EPD1 PE=3 SV=1:259.61	-	KOG4157:beta-1,6-N-acetylglucosaminyltransferase, contains WSC domain	-	40.01 cell growth / morphogenesis
e_gw1.6.473.1	e_gw1.6.473.1	e_gw1.6.473.1	scaffold_6:1007466-1009950	5.56986	15.0052	1.42975	0.00568074	yes	77392	IPR010920:Like-Sm ribonucleoprotein-related, core;;IPR006685:Mechanosensitive ion channel MscS;;IPR002048:Calcium-binding EF-hand;;IPR016191:Ribonuclease/ribotoxin	sp|O74839|YC1B_SCHPO Uncharacterized mscS family protein C1183.11 OS=Schizosaccharomyces pombe (strain ATCC 38366 / 972) GN=SPCC1183.11 PE=1 SV=1:416.387	-	KOG4629:Predicted mechanosensitive ion channel	RNA binding:GO:0003723;;calcium ion binding:GO:0005509;;ribonuclease activity:GO:0004540;;membrane:GO:0016020
e_gw1.18.334.1	e_gw1.18.334.1	e_gw1.18.334.1	scaffold_18:228035-229500	13.0761	35.0214	1.4213	0.00524845	yes	86058	IPR000832:GPCR, family 2, secretin-like	sp|Q54U75|CRLA_DICDI Cyclic AMP receptor-like protein A OS=Dictyostelium discoideum GN=crlA PE=2 SV=1:64.6994	-	KOG4193:G protein-coupled receptors	G-protein coupled receptor activity:GO:0004930;;membrane:GO:0016020	30.05.02.24 G-protein coupled receptor signalling pathway N.crassa
estExt_Genewise1Plus.C_13_t10395	estExt_Genewise1Plus.C_13_t10395	estExt_Genewise1Plus.C_13_t10395	scaffold_13:530996-533620	14.4	38.2933	1.41102	0.000959284	yes	100832	-	-	-	KOG1649:SWI-SNF chromatin remodeling complex, Snf5 subunit	-
e_gw1.11.804.1	e_gw1.11.804.1	e_gw1.11.804.1	scaffold_11:91890-93192	92.1305	244.982	1.41093	0.000352314	yes	81893	IPR001395:Aldo/keto reductase;;IPR005399:Potassium channel, voltage-dependent, beta subunit, KCNAB-related	sp|Q40648|KCAB_ORYSJ Probable voltage-gated potassium channel subunit beta OS=Oryza sativa subsp. japonica GN=KOB1 PE=1 SV=2:367.466	1.1.1.91:Aryl-alcohol dehydrogenase (NADP+).	KOG1575:Voltage-gated shaker-like K+ channel, subunit beta/KCNAB	potassium ion transport:GO:0006813;;aryl-alcohol dehydrogenase (NADP+) activity:GO:0047681;;integral to membrane:GO:0016021;;oxidoreductase activity:GO:0016491	01.01 amino acid metabolism	01.01.09.04 metabolism of phenylalanine	01.01.09.05 metabolism of tyrosine	01.05 C-compound and carbohydrate metabolism	01.05.02.07 sugar, glucoside, polyol and carboxylate catabolism B.subtilis	01.06 lipid, fatty acid and isoprenoid metabolism T.acidophilum	01.07.01 biosynthesis of vitamins, cofactors, and prosthetic groups N.crassa	01.20 secondary metabolism	01.20.01.09 metabolism of aminoglycoside antibiotics T.acidophilum	02.01 glycolysis and gluconeogenesis	02.16 fermentation	20.01.01 ion transport	20.01.01.01 cation transport (H+, Na+, K+, Ca2+ , NH4+, etc.)	20.09.18 cellular import	34.01.01 homeostasis of cations	34.01.01.01 homeostasis of metal ions (Na, K, Ca etc.) &nbsp;	16.01 protein binding	16.17.03 potassium binding	16.19.03 ATP binding	16.21.07 NAD/NADP binding	18.02 regulation of protein activity	20.03.01 channel / pore class transport	20.03.01.01 ion channels	20.03.25 ABC transporters
estExt_Genewise1Plus.C_1_t60435	estExt_Genewise1Plus.C_1_t60435	estExt_Genewise1Plus.C_1_t60435	scaffold_1:3570857-3573106	100.493	267.078	1.41017	0.00145748	yes	95062	IPR005828:General substrate transporter;;IPR007114:Major facilitator superfamily;;IPR003663:Sugar transporter;;IPR016196:MFS general substrate transporter;;IPR005829:Sugar transporter, conserved site	sp|P53387|KHT2_KLULA Hexose transporter 2 OS=Kluyveromyces lactis (strain ATCC 8585 / CBS 2359 / DSM 70799 / NBRC 1267 / NRRL Y-1140 / WM37) GN=KHT2 PE=3 SV=1:435.647	5.3.1.4:L-arabinose isomerase.	KOG0254:Predicted transporter (major facilitator superfamily)	sugar:hydrogen symporter activity:GO:0005351;;L-arabinose isomerase activity:GO:0008733;;carbohydrate transport:GO:0008643;;transporter activity:GO:0005215;;integral to membrane:GO:0016021;;transport:GO:0006810;;membrane:GO:0016020	01.05 C-compound and carbohydrate metabolism	01.05.25 regulation of C-compound and carbohydrate metabolism N.crassa	20.01.03 C-compound and carbohydrate transport	20.01.03.01 sugar transport	20.01.13 lipid/fatty acid transport	20.09.16 cellular export and secretion	20.09.18 cellular import	20.09.18.07 non-vesicular cellular import	34.11.12 perception of nutrients and nutritional adaptation N.crassa	20.03 transport facilities
e_gw1.3.119.1	e_gw1.3.119.1	e_gw1.3.119.1	scaffold_3:1740919-1745376	4.47913	11.7854	1.39571	0.00823994	yes	73644	-	-	6.3.2.19:Ubiquitin--protein ligase.	KOG2748:Uncharacterized conserved protein, contains chromo domain	negative regulation of ubiquitin-protein ligase activity:GO:0051444;;regulation of ubiquitin-protein ligase activity during meiotic cell cycle:GO:0051440;;regulation of ubiquitin-protein ligase activity:GO:0051438;;ubiquitin-protein ligase activity:GO:0004842;;positive regulation of ubiquitin-protein ligase activity:GO:0051443
fgenesh1_pm.5_#_113	fgenesh1_pm.5_#_113	fgenesh1_pm.5_#_113	scaffold_5:369022-371557	6.34923	16.6909	1.3944	0.00838114	yes	128575	IPR001138:Fungal transcriptional regulatory protein, N-terminal	sp|Q9UT46|MOC3_SCHPO Transcriptional regulatory protein moc3 OS=Schizosaccharomyces pombe (strain ATCC 38366 / 972) GN=moc3 PE=1 SV=3:61.2326	-	KOG1904:Transcription coactivator	regulation of transcription, DNA-dependent:GO:0006355;;nucleus:GO:0005634;;zinc ion binding:GO:0008270;;transcription factor activity:GO:0003700
fgenesh1_pm.8_#_185	fgenesh1_pm.8_#_185	fgenesh1_pm.8_#_185	scaffold_8:708517-710663	34.668	90.8625	1.39008	0.000565674	yes	129942	IPR000577:Carbohydrate kinase, FGGY;;IPR006003:Pentulose kinase	sp|Q04585|YDR09_YEAST Uncharacterized sugar kinase YDR109C OS=Saccharomyces cerevisiae (strain ATCC 204508 / S288c) GN=YDR109C PE=1 SV=1:587.03	2.7.1.47:D-ribulokinase.	KOG2517:Ribulose kinase and related carbohydrate kinases	carbohydrate metabolic process:GO:0005975;;D-ribulokinase activity:GO:0019150	01.04 phosphate metabolism	01.05 C-compound and carbohydrate metabolism
fgenesh1_pm.20_#_81	fgenesh1_pm.20_#_81	fgenesh1_pm.20_#_81	scaffold_20:271225-272755	8.79978	22.9624	1.38373	0.00889857	yes	132828	-	sp|P40549|MNT3_YEAST Alpha-1,3-mannosyltransferase MNT3 OS=Saccharomyces cerevisiae (strain ATCC 204508 / S288c) GN=MNT3 PE=1 SV=1:87.4261	-	-	-
estExt_Genewise1Plus.C_3_t30487	estExt_Genewise1Plus.C_3_t30487	estExt_Genewise1Plus.C_3_t30487	scaffold_3:1746812-1747566	82.2967	214.167	1.37983	0.00185129	yes
e_gw1.47.26.1	e_gw1.47.26.1	e_gw1.47.26.1	scaffold_47:67549-69126	11.1316	28.8916	1.37599	0.00646721	yes	93149	IPR007114:Major facilitator superfamily;;IPR011701:Major facilitator superfamily MFS-1;;IPR016196:MFS general substrate transporter	sp|O74923|YJ7D_SCHPO Uncharacterized transporter C757.13 OS=Schizosaccharomyces pombe (strain ATCC 38366 / 972) GN=SPCC757.13 PE=2 SV=1:285.419	-	KOG2533:Permease of the major facilitator superfamily	transporter activity:GO:0005215;;integral to membrane:GO:0016021;;transport:GO:0006810	20.01.23 allantoin and allantoate transport	20.09.18 cellular import	20.09.18.07 non-vesicular cellular import
gm1.6298_g	gm1.6298_g	gm1.6298_g	scaffold_17:661988-671723	13.9043	35.6828	1.35969	0.000862857	yes	10742	IPR009543:Vacuolar protein sorting-associated protein;;IPR017148:Vacuolar protein sorting-associated protein 13, fungi	sp|Q07878|VPS13_YEAST Vacuolar protein sorting-associated protein 13 OS=Saccharomyces cerevisiae (strain ATCC 204508 / S288c) GN=VPS13 PE=1 SV=1:1803.11	-	KOG1809:Vacuolar protein sorting-associated protein	protein localization:GO:0008104	14.04 protein targeting, sorting and translocation N.crassa	20.09.07.05 intra Golgi transport	20.09.13 vacuolar/lysosomal transport
fgenesh1_pm.1_#_21	fgenesh1_pm.1_#_21	fgenesh1_pm.1_#_21	scaffold_1:72898-74870	8.93972	22.8385	1.35317	0.00889857	yes
e_gw1.1.856.1	e_gw1.1.856.1	e_gw1.1.856.1	scaffold_1:410009-411692	23.6738	58.9791	1.31691	0.00277672	yes	69999	IPR009003:Peptidase, trypsin-like serine and cysteine;;IPR000832:GPCR, family 2, secretin-like	-	-	-	catalytic activity:GO:0003824;;G-protein coupled receptor activity:GO:0004930;;membrane:GO:0016020
estExt_fgenesh1_pg.C_1_t20054	estExt_fgenesh1_pg.C_1_t20054	estExt_fgenesh1_pg.C_1_t20054	scaffold_1:2167704-2168834	103.318	255.6	1.30679	0.00125452	yes
estExt_Genewise1Plus.C_18_t10152	estExt_Genewise1Plus.C_18_t10152	estExt_Genewise1Plus.C_18_t10152	scaffold_18:138489-140683	16.4116	40.5714	1.30574	0.0042051	yes	102117	IPR002495:Glycosyl transferase, family 8	sp|O15488|GLYG2_HUMAN Glycogenin-2 OS=Homo sapiens GN=GYG2 PE=1 SV=2:178.333	-	KOG1950:Glycosyl transferase, family 8 - glycogenin	transferase activity, transferring hexosyl groups:GO:0016758;;carbohydrate biosynthetic process:GO:0016051	01.05.02.07 sugar, glucoside, polyol and carboxylate catabolism N.crassa
estExt_fgenesh1_pg.C_60164	estExt_fgenesh1_pg.C_60164	estExt_fgenesh1_pg.C_60164	scaffold_6:546356-548051	20.9198	50.815	1.28039	0.00466071	yes	140931	IPR001810:Cyclin-like F-box	-	-	-	-
estExt_fgenesh1_pg.C_3_t10323	estExt_fgenesh1_pg.C_3_t10323	estExt_fgenesh1_pg.C_3_t10323	scaffold_3:1188449-1190916	87.9345	213.007	1.2764	0.00537921	yes	140500	IPR001401:Dynamin, GTPase region	sp|Q6PW23|MX_EPICO Interferon-induced GTP-binding protein Mx OS=Epinephelus coioides GN=mx PE=2 SV=1:151.369	-	KOG0446:Vacuolar sorting protein VPS1, dynamin, and related proteins	GTPase activity:GO:0003924;;GTP binding:GO:0005525;;dynamin GTPase activity:GO:0008549	32.05.01 resistance proteins
estExt_Genewise1Plus.C_15_t10070	estExt_Genewise1Plus.C_15_t10070	estExt_Genewise1Plus.C_15_t10070	scaffold_15:88829-90633	40.9552	98.4052	1.26469	0.00341966	yes	101318	IPR009049:Argininosuccinate lyase;;IPR000362:Fumarate lyase;;IPR008948:L-Aspartase-like;;IPR003031:Delta crystallin	sp|P50514|ARLZ_SCHPO Probable argininosuccinate lyase OS=Schizosaccharomyces pombe (strain ATCC 38366 / 972) GN=argx PE=2 SV=1:568.54	4.3.2.1:Argininosuccinate lyase.	KOG1316:Argininosuccinate lyase	argininosuccinate lyase activity:GO:0004056;;catalytic activity:GO:0003824;;arginine biosynthetic process via ornithine:GO:0042450	01.01.03.05.01 biosynthesis of arginine	01.01.03.05.02 degradation of arginine	01.01.05.03 metabolism of urea (urea cycle)	01.01.06.01 metabolism of aspartate
e_gw1.2.502.1	e_gw1.2.502.1	e_gw1.2.502.1	scaffold_2:1055188-1057803	96.1604	230.667	1.2623	0.00557642	yes	70804	IPR007632:Protein of unknown function DUF590	sp|O13621|YNG5_SCHPO Uncharacterized protein C691.05c OS=Schizosaccharomyces pombe (strain ATCC 38366 / 972) GN=SPBC691.05c PE=2 SV=1:288.115	-	KOG2513:Protein required for meiotic chromosome segregation	-	32.01.03 osmotic and salt stress response
estExt_Genemark1.C_140183	estExt_Genemark1.C_140183	estExt_Genemark1.C_140183	scaffold_14:681417-682256	45.4693	108.484	1.25452	0.00725166	yes	25677	IPR012336:Thioredoxin-like fold;;IPR001200:Phosducin	sp|Q12017|PLP2_YEAST Phosducin-like protein 2 OS=Saccharomyces cerevisiae (strain ATCC 204508 / S288c) GN=PLP2 PE=1 SV=1:189.504	-	KOG3170:Conserved phosducin-like protein	-	11.02.03.04 transcriptional control	34.11.03.07 pheromone response, mating-type determination, sex-specific proteins N.crassa	18.02.01.02.01 GTPase inhibitor (GIP)
e_gw1.4.1135.1	e_gw1.4.1135.1	e_gw1.4.1135.1	scaffold_4:131898-134523	31.3273	74.2541	1.24505	0.00204704	yes	74305	IPR001764:Glycoside hydrolase, family 3, N-terminal;;IPR002772:Glycoside hydrolase, family 3, C-terminal;;IPR017853:Glycoside hydrolase, catalytic core	sp|A5ABF5|BGLM_ASPNC Probable beta-glucosidase M OS=Aspergillus niger (strain CBS 513.88 / FGSC A1513) GN=bglM PE=3 SV=1:780.4	3.2.1.21:Beta-glucosidase.	-	hydrolase activity, hydrolyzing O-glycosyl compounds:GO:0004553;;carbohydrate metabolic process:GO:0005975;;beta-glucosidase activity:GO:0008422	01.05.02.07 sugar, glucoside, polyol and carboxylate catabolism N.crassa	01.05.03 polysaccharide metabolism
estExt_fgenesh1_pm.C_110262	estExt_fgenesh1_pm.C_110262	estExt_fgenesh1_pm.C_110262	scaffold_11:917010-918231	35.158	82.7336	1.23462	0.00568074	yes	137683	-	sp|Q5A360|SIL1_CANAL Nucleotide exchange factor SIL1 OS=Candida albicans GN=SIL1 PE=3 SV=1:93.9745	-	KOG2160:Armadillo/beta-catenin-like repeat-containing protein	-	14.04 protein targeting, sorting and translocation N.crassa
estExt_Genewise1.C_200016	estExt_Genewise1.C_200016	estExt_Genewise1.C_200016	scaffold_20:12590-15288	43.3632	101.293	1.22399	0.00350323	yes	114146	IPR014756:Immunoglobulin E-set;;IPR006048:Alpha-amylase, C-terminal all beta;;IPR017853:Glycoside hydrolase, catalytic core;;IPR006047:Glycosyl hydrolase, family 13, catalytic region;;IPR006589:Glycosyl hydrolase, family 13, subfamily, catalytic region;;IPR004193:Glycoside hydrolase, family 13, N-terminal	sp|Q96VA4|GLGB_ASPOR 1,4-alpha-glucan-branching enzyme OS=Aspergillus oryzae (strain ATCC 42149 / RIB 40) GN=gbeA PE=2 SV=1:1088.17	2.4.1.18:1,4-alpha-glucan branching enzyme.	KOG0470:1,4-alpha-glucan branching enzyme/starch branching enzyme II	hydrolase activity, hydrolyzing O-glycosyl compounds:GO:0004553;;cation binding:GO:0043169;;carbohydrate metabolic process:GO:0005975;;1,4-alpha-glucan branching enzyme activity:GO:0003844;;catalytic activity:GO:0003824	01.05 C-compound and carbohydrate metabolism	01.05.02.07 sugar, glucoside, polyol and carboxylate catabolism A.thaliana	01.05.03 polysaccharide metabolism	02.19 metabolism of energy reserves (e.g. glycogen, trehalose) S.cerevisiae
gm1.7371_g	gm1.7371_g	gm1.7371_g	scaffold_24:290468-291580	45.5343	106.234	1.22222	0.00548545	yes	11815	IPR016040:NAD(P)-binding;;IPR002347:Glucose/ribitol dehydrogenase;;IPR002198:Short-chain dehydrogenase/reductase SDR	sp|Q96NR8|RDH12_HUMAN Retinol dehydrogenase 12 OS=Homo sapiens GN=RDH12 PE=1 SV=3:92.4337	1.1.1.-:With NAD(+) or NADP(+) as acceptor.	KOG1208:Dehydrogenases with different specificities (related to short-chain alcohol dehydrogenases)	mevaldate reductase activity:GO:0004495;;epoxide dehydrogenase activity:GO:0018451;;steroid dehydrogenase activity:GO:0016229;;steroid dehydrogenase activity, acting on the CH-CH group of donors:GO:0033765;;metabolic process:GO:0008152;;3-keto sterol reductase activity:GO:0000253;;(R)-2-hydroxyglutarate dehydrogenase activity:GO:0051990;;catalytic activity:GO:0003824;;oxidoreductase activity:GO:0…	01.07 metabolism of vitamins, cofactors, and prosthetic groups	34.11.01 photoperception and response
fgenesh2_kg.12_#_22_#_gi|38130657|gb|CF875975.1|CF875975	fgenesh2_kg.12_#_22_#_gi|38130657|gb|CF875975.1|CF875975	fgenesh2_kg.12_#_22_#_gi|38130657|gb|CF875975.1|CF875975	scaffold_12:174272-174849	126.713	294.697	1.21767	0.00647715	yes
estExt_fgenesh2_kg.C_20225	estExt_fgenesh2_kg.C_20225	estExt_fgenesh2_kg.C_20225	scaffold_2:1419760-1420930	39.2123	90.4353	1.20558	0.00843643	yes	122103	IPR005061:Protein of unknown function DUF292, eukaryotic	sp|Q3ZBV1|IST1_BOVIN IST1 homolog OS=Bos taurus GN=IST1 PE=2 SV=1:106.301	-	KOG2027:Spindle pole body protein	-	12.04.01 translation initiation
estExt_fgenesh1_pg.C_300090	estExt_fgenesh1_pg.C_300090	estExt_fgenesh1_pg.C_300090	scaffold_30:302302-304152	51.0091	112.409	1.13993	0.00549327	yes	143068	IPR008273:Cellular retinaldehyde-binding/triple function, N-terminal;;IPR001251:Cellular retinaldehyde-binding/triple function, C-terminal;;IPR011074:Phosphatidylinositol transfer protein-like, N-terminal	sp|P24280|SEC14_YEAST SEC14 cytosolic factor OS=Saccharomyces cerevisiae (strain ATCC 204508 / S288c) GN=SEC14 PE=1 SV=3:128.642	-	KOG1471:Phosphatidylinositol transfer protein SEC14 and related proteins	-	20.01.13 lipid/fatty acid transport	20.09.07 vesicular transport (Golgi network, etc.) N.crassa
gw1.16.39.1	gw1.16.39.1	gw1.16.39.1	scaffold_16:491347-492773	49.4781	108.936	1.13862	0.00899959	yes	41630	IPR007087:Zinc finger, C2H2-type;;IPR015880:Zinc finger, C2H2-like	sp|P41696|AZF1_YEAST Asparagine-rich zinc finger protein AZF1 OS=Saccharomyces cerevisiae (strain ATCC 204508 / S288c) GN=AZF1 PE=1 SV=1:193.741	-	KOG1721:FOG: Zn-finger	nucleic acid binding:GO:0003676;;zinc ion binding:GO:0008270;;intracellular:GO:0005622	11.02.03.04 transcriptional control
estExt_Genewise1Plus.C_220395	estExt_Genewise1Plus.C_220395	estExt_Genewise1Plus.C_220395	scaffold_22:479780-482238	89.5583	42.8068	-1.06499	0.00874655	yes	103139	IPR009036:Molybdenum cofactor biosynthesis;;IPR000594:UBA/THIF-type NAD/FAD binding fold;;IPR006285:E1-like protein-activating enzyme Gsa7p/Apg7p	sp|Q871U2|ATG7_NEUCR Ubiquitin-like modifier-activating enzyme atg-7 OS=Neurospora crassa GN=atg-7 PE=3 SV=1:1004.97	-	KOG2337:Ubiquitin activating E1 enzyme-like protein	catalytic activity:GO:0003824	14.04 protein targeting, sorting and translocation S.cerevisiae	14.07 protein modification	14.07.01 modification with fatty acids (e.g. myristylation, palmitylation, farnesylation)	14.07.05 modification by ubiquitination, deubiquitination	14.07.07 modification by ubiquitin-related proteins S.cerevisiae	14.07.11.01 autoproteolytic processing	14.13.01.01 proteasomal degradation (ubiquitin/proteasomal pathway) S.cerevisiae	20.01.10 protein transport	20.09.13 vacuolar/lysosomal transport	40.01 cell growth / morphogenesis	42.04 cytoskeleton/structural proteins	42.25 vacuole or lysosome	43.01.03.05 budding, cell polarity and filament formation S.cerevisiae	16.01 protein binding	18.02.01.01 enzyme activator
fgenesh1_pm.4_#_33	fgenesh1_pm.4_#_33	fgenesh1_pm.4_#_33	scaffold_4:106215-107703	221.723	105.391	-1.07301	0.00757382	yes	128036	IPR002328:Alcohol dehydrogenase, zinc-containing, conserved site;;IPR016040:NAD(P)-binding;;IPR013154:Alcohol dehydrogenase GroES-like;;IPR013149:Alcohol dehydrogenase, zinc-binding;;IPR011032:GroES-like	sp|P77316|YBDR_ECOLI Uncharacterized zinc-type alcohol dehydrogenase-like protein YbdR OS=Escherichia coli (strain K12) GN=ybdR PE=3 SV=1:207.608	1.1.1.1:Alcohol dehydrogenase.	KOG0024:Sorbitol dehydrogenase	alcohol dehydrogenase activity, iron-dependent:GO:0004025;;alcohol dehydrogenase activity, metal ion-independent:GO:0004023;;alcohol dehydrogenase activity:GO:0004022;;zinc ion binding:GO:0008270;;metabolic process:GO:0008152;;catalytic activity:GO:0003824;;oxidoreductase activity:GO:0016491;;binding:GO:0005488;;alcohol dehydrogenase activity, zinc-dependent:GO:0004024	01.01.06.04.02 degradation of threonine	01.05 C-compound and carbohydrate metabolism	02.16.01 alcohol fermentation	16.17.09 heavy metal binding (Cu, Fe, Zn)
e_gw1.25.81.1	e_gw1.25.81.1	e_gw1.25.81.1	scaffold_25:239339-241264	77.4976	36.6976	-1.07847	0.00846838	yes	89254	IPR013121:Ferric reductase, NAD binding;;IPR013130:Ferric reductase-like transmembrane component, N-terminal;;IPR013112:FAD-binding 8	sp|Q9XYS3|NOXA_DICDI Superoxide-generating NADPH oxidase heavy chain subunit A OS=Dictyostelium discoideum GN=noxA PE=2 SV=1:377.096	-	KOG0039:Ferric reductase, NADH/NADPH oxidase and related proteins	FAD binding:GO:0050660;;electron transport:GO:0006118;;integral to membrane:GO:0016021;;oxidoreductase activity:GO:0016491;;iron ion binding:GO:0005506	20.01.15 electron transport	30.01 cellular signalling	32.01.01 oxidative stress response	32.07.07.07 superoxide metabolism	34.01.01 homeostasis of cations	34.11.07 gravity perception and response	34.11.09 temperature perception and response	40.01 cell growth / morphogenesis	40.20 cell aging	16.17.09 heavy metal binding (Cu, Fe, Zn)	16.21.01 heme binding	16.21.05 FAD/FMN binding	16.21.07 NAD/NADP binding	20.03.01.01 ion channels
e_gw1.11.724.1	e_gw1.11.724.1	e_gw1.11.724.1	scaffold_11:208781-210003	119.396	56.1967	-1.0872	0.00980446	yes	81742	IPR001915:Peptidase M48, Ste24p	sp|Q9P7G4|OMA1_SCHPO Mitochondrial metalloendopeptidase OMA1 OS=Schizosaccharomyces pombe (strain ATCC 38366 / 972) GN=oma1 PE=2 SV=1:208.379	-	KOG2661:Peptidase family M48	membrane:GO:0016020;;proteolysis:GO:0006508;;metalloendopeptidase activity:GO:0004222
estExt_fgenesh1_pm.C_2_t20140	estExt_fgenesh1_pm.C_2_t20140	estExt_fgenesh1_pm.C_2_t20140	scaffold_2:2221603-2224335	61.3306	28.8494	-1.08806	0.00630158	yes	136048	-	-	3.2.1.3:Glucan 1,4-alpha-glucosidase.	KOG1216:von Willebrand factor and related coagulation proteins	glucan 1,4-alpha-glucosidase activity:GO:0004339
e_gw1.12.177.1	e_gw1.12.177.1	e_gw1.12.177.1	scaffold_12:248447-252164	26.7744	12.5144	-1.09726	0.00994198	yes	82249	IPR009078:Ferritin/ribonucleotide reductase-like	-	-	KOG2992:Nucleolar GTPase/ATPase p130	transition metal ion binding:GO:0046914;;oxidoreductase activity:GO:0016491
e_gw1.2.884.1	e_gw1.2.884.1	e_gw1.2.884.1	scaffold_2:1759240-1761837	83.3264	38.9418	-1.09745	0.00565501	yes	71415	-	sp|P53858|BNI4_YEAST Protein BNI4 OS=Saccharomyces cerevisiae (strain ATCC 204508 / S288c) GN=BNI4 PE=1 SV=1:88.5817	-	KOG2806:Chitinase	cyclic nucleotide-dependent protein kinase activity:GO:0004690;;SAP kinase activity:GO:0016909;;transmembrane receptor protein kinase activity:GO:0019199;;casein kinase I activity:GO:0004681;;MP kinase activity:GO:0008339;;JUN kinase kinase kinase activity:GO:0004706;;transmembrane receptor protein serine/threonine kinase activity:GO:0004675;;3-phosphoinositide-dependent protein kinase activity:G…
e_gw1.2.587.1	e_gw1.2.587.1	e_gw1.2.587.1	scaffold_2:1501389-1502412	279.196	130.438	-1.09791	0.00619172	yes
estExt_fgenesh1_pm.C_50210	estExt_fgenesh1_pm.C_50210	estExt_fgenesh1_pm.C_50210	scaffold_5:710056-711527	97.3363	45.0617	-1.11108	0.00807636	yes	136611	IPR002328:Alcohol dehydrogenase, zinc-containing, conserved site;;IPR016040:NAD(P)-binding;;IPR013154:Alcohol dehydrogenase GroES-like;;IPR013149:Alcohol dehydrogenase, zinc-binding;;IPR011032:GroES-like	sp|Q58D31|DHSO_BOVIN Sorbitol dehydrogenase OS=Bos taurus GN=SORD PE=2 SV=3:258.07	1.1.1.14:L-iditol 2-dehydrogenase.	KOG0024:Sorbitol dehydrogenase	metabolic process:GO:0008152;;zinc ion binding:GO:0008270;;catalytic activity:GO:0003824;;binding:GO:0005488;;oxidoreductase activity:GO:0016491;;L-iditol 2-dehydrogenase activity:GO:0003939	01.05 C-compound and carbohydrate metabolism	01.05.02 sugar, glucoside, polyol and carboxylate metabolism	01.05.02.04 sugar, glucoside, polyol and carboxylate anabolism S.cerevisiae	01.05.02.07 sugar, glucoside, polyol and carboxylate catabolism S.cerevisiae	01.07 metabolism of vitamins, cofactors, and prosthetic groups	01.20.01.01 metabolism of secondary monosaccharides S.cerevisiae	16.17 metal binding	16.17.09 heavy metal binding (Cu, Fe, Zn)	16.21.07 NAD/NADP binding
estExt_Genewise1Plus.C_1_t50047	estExt_Genewise1Plus.C_1_t50047	estExt_Genewise1Plus.C_1_t50047	scaffold_1:2586136-2587784	77.5953	35.8837	-1.11264	0.00800982	yes	94665	IPR011051:Cupin, RmlC-type;;IPR017774:Bicupin, oxalate decarboxylase/oxidase;;IPR006045:Cupin 1	sp|O34714|OXDC_BACSU Oxalate decarboxylase oxdC OS=Bacillus subtilis GN=oxdC PE=1 SV=1:437.187	-	-	nutrient reservoir activity:GO:0045735	01.05 C-compound and carbohydrate metabolism	01.05.02.07 sugar, glucoside, polyol and carboxylate catabolism B.subtilis	01.05.06.07 C-2 compound and organic acid catabolism B.subtilis	02.13 respiration	02.45 energy conversion and regeneration	32.05 disease, virulence and defense
gw1.7.728.1	gw1.7.728.1	gw1.7.728.1	scaffold_7:450952-452842	73.3045	33.6191	-1.12462	0.00615961	yes	55662	IPR013027:FAD-dependent pyridine nucleotide-disulphide oxidoreductase;;IPR017046:Prenylcysteine oxidase	sp|P57681|PCYOX_ARATH Probable prenylcysteine oxidase OS=Arabidopsis thaliana GN=At5g63910 PE=2 SV=1:125.561	-	KOG2415:Electron transfer flavoprotein ubiquinone oxidoreductase	prenylcysteine oxidase activity:GO:0001735	14.07 protein modification	14.13 protein/peptide degradation
estExt_fgenesh1_pg.C_80072	estExt_fgenesh1_pg.C_80072	estExt_fgenesh1_pg.C_80072	scaffold_8:274996-276344	129.835	59.4634	-1.1266	0.00519717	yes	141264	IPR001164:Arf GTPase activating protein	sp|P35197|GCS1_YEAST ADP-ribosylation factor GTPase-activating protein GCS1 OS=Saccharomyces cerevisiae (strain ATCC 204508 / S288c) GN=GCS1 PE=1 SV=1:246.514	-	KOG0704:ADP-ribosylation factor GTPase activator	ARF GTPase activator activity:GO:0008060;;zinc ion binding:GO:0008270;;regulation of ARF GTPase activity:GO:0032312	10.03.01 mitotic cell cycle and cell cycle control N.crassa	10.03.05.03 cell cycle dependent actin filament reorganization S.cerevisiae	20.09.07.03 ER to Golgi transport	20.09.16 cellular export and secretion	20.09.18 cellular import	42.04.03 actin cytoskeleton	16.01 protein binding	18.02.01.01.01 GTPase activator (GAP)
fgenesh1_pm.2_#_489	fgenesh1_pm.2_#_489	fgenesh1_pm.2_#_489	scaffold_2:1683292-1685892	55.7476	25.4866	-1.12917	0.0050054	yes	127164	IPR001611:Leucine-rich repeat	sp|Q9UUG2|YFT6_SCHPO Uncharacterized leucine-rich repeat-containing protein C926.06c OS=Schizosaccharomyces pombe (strain ATCC 38366 / 972) GN=SPAC926.06c PE=1 SV=1:188.734;;sp|Q9UUG2|YFT6_SCHPO Uncharacterized leucine-rich repeat-containing protein C926.06c OS=Schizosaccharomyces pombe (strain ATCC 38366 / 972) GN=SPAC926.06c PE=1 SV=1:124.02	-	KOG1259:Nischarin, modulator of integrin alpha5 subunit action	protein binding:GO:0005515
estExt_Genewise1Plus.C_260224	estExt_Genewise1Plus.C_260224	estExt_Genewise1Plus.C_260224	scaffold_26:259869-262582	103.433	47.281	-1.12936	0.00491047	yes	103650	IPR010255:Haem peroxidase;;IPR000763:Catalase-peroxidase haem;;IPR002016:Haem peroxidase, plant/fungal/bacterial	sp|Q2TW34|KATG_ASPOR Catalase-peroxidase OS=Aspergillus oryzae (strain ATCC 42149 / RIB 40) GN=katG PE=3 SV=1:1170.61	1.11.1.11:L-ascorbate peroxidase.	-	L-ascorbate peroxidase activity:GO:0016688;;response to oxidative stress:GO:0006979;;electron transport:GO:0006118;;peroxidase activity:GO:0004601;;heme binding:GO:0020037;;catalase activity:GO:0004096	32.07.07.01 catalase reaction
estExt_Genewise1.C_220304	estExt_Genewise1.C_220304	estExt_Genewise1.C_220304	scaffold_22:396863-398562	85.326	38.8376	-1.13553	0.00536298	yes	114726	IPR011043:Galactose oxidase/kelch, beta-propeller;;IPR011498:Kelch repeat type 2	sp|Q93XW5|NSP5_ARATH Nitrile-specifier protein 5 OS=Arabidopsis thaliana GN=NSP5 PE=2 SV=1:69.707	-	KOG0379:Kelch repeat-containing proteins	-
gw1.19.129.1	gw1.19.129.1	gw1.19.129.1	scaffold_19:183065-183702	541.98	246.438	-1.13702	0.00568074	yes	45881	IPR000152:Aspartic acid and asparagine hydroxylation site;;IPR006863:Erv1/Alr	sp|Q12284|ERV2_YEAST FAD-linked sulfhydryl oxidase ERV2 OS=Saccharomyces cerevisiae (strain ATCC 204508 / S288c) GN=ERV2 PE=1 SV=1:156.762	-	KOG3355:Mitochondrial sulfhydryl oxidase involved in the biogenesis of cytosolic Fe/S proteins	-	01.02 nitrogen, sulfur and selenium metabolism S.cerevisiae	14.01 protein folding and stabilization	14.07 protein modification	34.01.01.01 homeostasis of metal ions (Na, K, Ca etc.) N.crassa	42.16 mitochondrion
e_gw1.3.1279.1	e_gw1.3.1279.1	e_gw1.3.1279.1	scaffold_3:74970-76586	112.187	50.9026	-1.14009	0.00407626	yes	72915	IPR000362:Fumarate lyase;;IPR008948:L-Aspartase-like;;IPR005677:Fumarate hydratase, class II	sp|P55250|FUMH_RHIOR Fumarate hydratase, mitochondrial OS=Rhizopus oryzae GN=FUMR PE=3 SV=1:664.455	4.2.1.2:Fumarate hydratase.	KOG1317:Fumarase	fumarate metabolic process:GO:0006106;;fumarate hydratase activity:GO:0004333;;tricarboxylic acid cycle enzyme complex:GO:0045239;;catalytic activity:GO:0003824	01.01.06 metabolism of the aspartate family	01.01.06.01.01 biosynthesis of aspartate	01.01.06.01.02 degradation of aspartate	01.01.11 metabolism of the pyruvate family (alanine, isoleucine, leucine, valine) and D-alanine T.acidophilum	01.02 nitrogen, sulfur and selenium metabolism B.subtilis	01.02.07 regulation of nitrogen, sulfur and selenium metabolism T.acidophilum	01.05 C-compound and carbohydrate metabolism	01.05.02.04 sugar, glucoside, polyol and carboxylate anabolism	01.05.02.07 sugar, glucoside, polyol and carboxylate catabolism S.cerevisiae	01.06 lipid, fatty acid and isoprenoid metabolism B.subtilis	02.10 tricarboxylic-acid pathway (citrate cycle, Krebs cycle, TCA cycle) N.crassa	02.13.03 aerobic respiration	42.16 mitochondrion
estExt_Genemark1.C_80189	estExt_Genemark1.C_80189	estExt_Genemark1.C_80189	scaffold_8:740895-743854	37.5962	17.0577	-1.14016	0.00888502	yes	24911	IPR000504:RNA recognition motif, RNP-1;;IPR006569:Regulation of nuclear pre-mRNA protein;;IPR008942:ENTH/VHS	sp|Q9UTE3|SEB1_SCHPO Rpb7-binding protein seb1 OS=Schizosaccharomyces pombe (strain ATCC 38366 / 972) GN=seb1 PE=1 SV=3:296.204	-	KOG0132:RNA polymerase II C-terminal domain-binding protein RA4, contains RPR and RRM domains	nucleic acid binding:GO:0003676	11.02.03.01 general transcription activities
estExt_fgenesh1_pm.C_130181	estExt_fgenesh1_pm.C_130181	estExt_fgenesh1_pm.C_130181	scaffold_13:633759-635726	72.5324	32.9047	-1.14033	0.00646488	yes	137900	IPR001046:Natural resistance-associated macrophage protein	sp|P38925|SMF1_YEAST Manganese transporter SMF1 OS=Saccharomyces cerevisiae (strain ATCC 204508 / S288c) GN=SMF1 PE=1 SV=2:506.908	-	KOG1291:Mn2+ and Fe2+ transporters of the NRAMP family	transporter activity:GO:0005215;;transport:GO:0006810;;membrane:GO:0016020	10.03.01 mitotic cell cycle and cell cycle control N.crassa	14.04 protein targeting, sorting and translocation S.cerevisiae	20.01.01.01.01 heavy metal ion transport (Cu+, Fe3+, etc.) N.crassa	20.09.04 mitochondrial transport	20.09.18 cellular import	20.09.18.07 non-vesicular cellular import	34.01.01.01 homeostasis of metal ions (Na, K, Ca etc.) N.crassa
estExt_fgenesh1_pg.C_1_t20364	estExt_fgenesh1_pg.C_1_t20364	estExt_fgenesh1_pg.C_1_t20364	scaffold_1:3277302-3278618	161.077	73.0198	-1.14139	0.00422093	yes	139985	IPR004820:Cytidylyltransferase	sp|Q10350|YDA8_SCHPO Uncharacterized protein C1F12.08 OS=Schizosaccharomyces pombe (strain ATCC 38366 / 972) GN=SPAC1F12.08 PE=2 SV=2:104.375	-	KOG3351:Predicted nucleotidyltransferase	nucleotidyltransferase activity:GO:0016779;;biosynthetic process:GO:0009058
estExt_Genewise1Plus.C_14_t10464	estExt_Genewise1Plus.C_14_t10464	estExt_Genewise1Plus.C_14_t10464	scaffold_14:620672-622488	68.7563	30.8849	-1.15459	0.00506168	yes
estExt_Genewise1Plus.C_560011	estExt_Genewise1Plus.C_560011	estExt_Genewise1Plus.C_560011	scaffold_56:8607-9647	212.1	94.3371	-1.16885	0.00292003	yes	105286	-	-	-	KOG4157:beta-1,6-N-acetylglucosaminyltransferase, contains WSC domain	-
e_gw1.20.116.1	e_gw1.20.116.1	e_gw1.20.116.1	scaffold_20:416970-420052	34.126	15.1693	-1.16972	0.00540103	yes	87029	IPR017442:Serine/threonine protein kinase-related;;IPR000719:Protein kinase, core;;IPR002290:Serine/threonine protein kinase;;IPR011009:Protein kinase-like;;IPR008271:Serine/threonine protein kinase, active site;;IPR017441:Protein kinase ATP binding, conserved site;;IPR001245:Tyrosine protein kinase	sp|Q52EB3|ATG1_MAGO7 Serine/threonine-protein kinase ATG1 OS=Magnaporthe oryzae (strain 70-15 / FGSC 8958) GN=ATG1 PE=1 SV=1:1047.34	-	KOG0595:Serine/threonine-protein kinase involved in autophagy	casein kinase I activity:GO:0004681;;MP kinase activity:GO:0008339;;transmembrane receptor protein serine/threonine kinase activity:GO:0004675;;NF-kappaB-inducing kinase activity:GO:0004704;;JUN kinase activity:GO:0004705;;AMP-activated protein kinase activity:GO:0004679;;galactosyltransferase-associated kinase activity:GO:0004695;;MAP kinase kinase kinase kinase activity:GO:0008349;;ATP binding:…	01.04 phosphate metabolism	14.07.03 modification by phosphorylation, dephosphorylation, autophosphorylation N.crassa	14.07.11.01 autoproteolytic processing	14.13.04 lysosomal and vacuolar protein degradation S.cerevisiae	20.09.13 vacuolar/lysosomal transport	30.01 cellular signalling	30.01.05.01 protein kinase	32.01.11 nutrient starvation response	43.01.03.09 development of asco- basidio- or zygospore S.cerevisiae
estExt_Genewise1.C_3_t10444	estExt_Genewise1.C_3_t10444	estExt_Genewise1.C_3_t10444	scaffold_3:511870-514196	92.6179	40.9453	-1.17759	0.00268177	yes	107898	IPR002403:Cytochrome P450, E-class, group IV;;IPR001128:Cytochrome P450	sp|O14442|CP51_UNCNE Eburicol 14-alpha-demethylase OS=Uncinula necator GN=CYP51 PE=2 SV=2:670.618	-	KOG0684:Cytochrome P450	electron transport:GO:0006118;;sterol 14-demethylase activity:GO:0008398;;heme binding:GO:0020037;;monooxygenase activity:GO:0004497;;iron ion binding:GO:0005506	01.05.13 transfer of activated C-1 groups	01.06.06.11 tetracyclic and pentacyclic triterpenes (cholesterin, steroids and hopanoids) metabolism N.crassa	32.07.01 detoxification involving cytochrome P450 S.cerevisiae	16.17.09 heavy metal binding (Cu, Fe, Zn)	16.21.01 heme binding
estExt_Genemark1.C_1_t20191	estExt_Genemark1.C_1_t20191	estExt_Genemark1.C_1_t20191	scaffold_1:2505039-2508783	68.3193	30.1164	-1.18174	0.00268177	yes	23392	IPR006597:Sel1-like;;IPR013026:Tetratricopeptide region	sp|O94614|CHR4_SCHPO Chitin synthase regulatory factor 4 OS=Schizosaccharomyces pombe (strain ATCC 38366 / 972) GN=chr4 PE=1 SV=4:190.66	-	KOG1550:Extracellular protein SEL-1 and related proteins	-	01.05.25 regulation of C-compound and carbohydrate metabolism N.crassa	42.01 cell wall	18.02.01 enzymatic activity regulation / enzyme regulator N.crassa
estExt_Genewise1Plus.C_15_t10074	estExt_Genewise1Plus.C_15_t10074	estExt_Genewise1Plus.C_15_t10074	scaffold_15:96057-99650	82.1804	36.1457	-1.18497	0.00224587	yes	101321	-	-	-	KOG2510:SWI-SNF chromatin-remodeling complex protein	-
estExt_fgenesh1_pg.C_120154	estExt_fgenesh1_pg.C_120154	estExt_fgenesh1_pg.C_120154	scaffold_12:655608-656874	212.566	93.4762	-1.18524	0.00260871	yes	141831	-	-	-	KOG4196:bZIP transcription factor MafK	-
estExt_Genewise1.C_6_t20284	estExt_Genewise1.C_6_t20284	estExt_Genewise1.C_6_t20284	scaffold_6:869248-872363	107.295	47.1733	-1.18554	0.0042616	yes	109567	IPR001764:Glycoside hydrolase, family 3, N-terminal;;IPR002772:Glycoside hydrolase, family 3, C-terminal;;IPR017853:Glycoside hydrolase, catalytic core	sp|Q4WMU3|BGLF_ASPFU Probable beta-glucosidase F OS=Neosartorya fumigata (strain ATCC MYA-4609 / Af293 / CBS 101355 / FGSC A1100) GN=bglF PE=3 SV=2:1031.17	3.2.1.21:Beta-glucosidase.	-	hydrolase activity, hydrolyzing O-glycosyl compounds:GO:0004553;;carbohydrate metabolic process:GO:0005975;;beta-glucosidase activity:GO:0008422	01.05.02.07 sugar, glucoside, polyol and carboxylate catabolism N.crassa	01.05.03 polysaccharide metabolism
estExt_Genewise1Plus.C_290114	estExt_Genewise1Plus.C_290114	estExt_Genewise1Plus.C_290114	scaffold_29:182154-185659	106.101	46.4762	-1.19087	0.002738	yes	104119	IPR001736:Phospholipase D/Transphosphatidylase	sp|P36126|SPO14_YEAST Phospholipase D1 OS=Saccharomyces cerevisiae (strain ATCC 204508 / S288c) GN=SPO14 PE=1 SV=3:90.8929;;sp|P36126|SPO14_YEAST Phospholipase D1 OS=Saccharomyces cerevisiae (strain ATCC 204508 / S288c) GN=SPO14 PE=1 SV=3:292.738	3.1.4.4:Phospholipase D.	KOG1329:Phospholipase D1	metabolic process:GO:0008152;;catalytic activity:GO:0003824;;phospholipase D activity:GO:0004630	01.06 lipid, fatty acid and isoprenoid metabolism N.crassa	10.03.02 meiosis	43.01.03.09 development of asco- basidio- or zygospore N.crassa
e_gw1.1.354.1	e_gw1.1.354.1	e_gw1.1.354.1	scaffold_1:3071755-3074364	118.708	51.8988	-1.19364	0.00302506	yes	70006	IPR005225:Small GTP-binding protein;;IPR000640:Translation elongation factor EFG/EF2, C-terminal;;IPR000795:Protein synthesis factor, GTP-binding;;IPR004161:Translation elongation factor EFTu/EF1A, domain 2;;IPR005517:Translation elongation factor EFG/EF2, domain IV;;IPR009022:Elongation factor G, III and V;;IPR004540:Translation elongation factor EFG/EF2;;IPR009000:Translation elongation and ini…	sp|Q7SH14|EFGM_NEUCR Elongation factor G, mitochondrial OS=Neurospora crassa GN=mef-1 PE=3 SV=2:1259.59	-	KOG0465:Mitochondrial elongation factor	translation elongation factor activity:GO:0003746;;protein-synthesizing GTPase activity:GO:0008547;;GTPase activity:GO:0003924;;translational elongation:GO:0006414;;translation:GO:0006412;;GTP binding:GO:0005525;;intracellular:GO:0005622	12.04.02 translation elongation	16.19 nucleotide/nucleoside/nucleobase binding H.pylori	16.19.05 GTP binding
estExt_Genewise1Plus.C_19_t10328	estExt_Genewise1Plus.C_19_t10328	estExt_Genewise1Plus.C_19_t10328	scaffold_19:422697-425701	130.947	57.1902	-1.19515	0.00419907	yes	102436	IPR011047:Quinonprotein alcohol dehydrogenase-like;;IPR011678:Protein of unknown function DUF1620	sp|Q6NRB9|K0090_XENLA Uncharacterized protein KIAA0090 homolog OS=Xenopus laevis PE=2 SV=1:165.236	-	KOG2103:Uncharacterized conserved protein	-
e_gw1.3.978.1	e_gw1.3.978.1	e_gw1.3.978.1	scaffold_3:441510-443611	36.9143	16.0503	-1.20158	0.00956571	yes	72588	IPR002695:AICARFT/IMPCHase bienzyme;;IPR011607:MGS-like;;IPR013982:AICARFT/IMPCHase bienzyme, formylation region	sp|P38009|PUR92_YEAST Bifunctional purine biosynthesis protein ADE17 OS=Saccharomyces cerevisiae (strain ATCC 204508 / S288c) GN=ADE17 PE=1 SV=2:862.062	-	KOG2555:AICAR transformylase/IMP cyclohydrolase/methylglyoxal synthase	IMP biosynthetic process:GO:0006188;;IMP cyclohydrolase activity:GO:0003937;;purine nucleotide biosynthetic process:GO:0006164;;phosphoribosylaminoimidazolecarboxamide formyltransferase activity:GO:0004643;;catalytic activity:GO:0003824	01.03 nucleotide/nucleoside/nucleobase metabolism	01.03.01 purin nucleotide/nucleoside/nucleobase metabolism	01.03.01.03 purine nucleotide/nucleoside/nucleobase anabolism N.crassa	01.05.13.03 tetrahydrofolate-dependent C-1-transfer S.cerevisiae	02.13.03 aerobic respiration	43.01.03.09 development of asco- basidio- or zygospore S.cerevisiae
estExt_fgenesh1_pg.C_140152	estExt_fgenesh1_pg.C_140152	estExt_fgenesh1_pg.C_140152	scaffold_14:623065-627312	65.3127	28.3304	-1.20501	0.00214833	yes	142050	IPR001965:Zinc finger, PHD-type;;IPR007087:Zinc finger, C2H2-type;;IPR003822:Paired amphipathic helix;;IPR001841:Zinc finger, RING-type;;IPR015880:Zinc finger, C2H2-like;;IPR011011:Zinc finger, FYVE/PHD-type;;IPR002110:Ankyrin	sp|P38806|YNG2_YEAST Chromatin modification-related protein YNG2 OS=Saccharomyces cerevisiae (strain ATCC 204508 / S288c) GN=YNG2 PE=1 SV=1:60.4622	-	KOG1973:Chromatin remodeling protein, contains PHD Zn-finger	nucleic acid binding:GO:0003676;;regulation of transcription, DNA-dependent:GO:0006355;;nucleus:GO:0005634;;zinc ion binding:GO:0008270;;protein binding:GO:0005515;;intracellular:GO:0005622
e_gw1.2.1454.1	e_gw1.2.1454.1	e_gw1.2.1454.1	scaffold_2:1457550-1458467	413.297	178.977	-1.2074	0.00200442	yes	70947	IPR016040:NAD(P)-binding	sp|Q5AP65|FMP52_CANAL Protein FMP52, mitochondrial OS=Candida albicans GN=FMP52 PE=3 SV=1:54.6842	-	-	metabolic process:GO:0008152;;catalytic activity:GO:0003824;;binding:GO:0005488
estExt_Genewise1Plus.C_250130	estExt_Genewise1Plus.C_250130	estExt_Genewise1Plus.C_250130	scaffold_25:215731-218041	51.1192	22.0302	-1.21438	0.00304955	yes	103464	IPR001138:Fungal transcriptional regulatory protein, N-terminal;;IPR000637:HMG-I and HMG-Y, DNA-binding	sp|Q9UT46|MOC3_SCHPO Transcriptional regulatory protein moc3 OS=Schizosaccharomyces pombe (strain ATCC 38366 / 972) GN=moc3 PE=1 SV=3:64.6994	-	-	regulation of transcription, DNA-dependent:GO:0006355;;nucleus:GO:0005634;;zinc ion binding:GO:0008270;;transcription factor activity:GO:0003700
estExt_fgenesh1_pg.C_200042	estExt_fgenesh1_pg.C_200042	estExt_fgenesh1_pg.C_200042	scaffold_20:172571-174170	69.4781	29.8993	-1.21645	0.00377963	yes	142507	IPR000073:Alpha/beta hydrolase fold-1;;IPR003089:Alpha/beta hydrolase	sp|Q02104|LIP1_PSYIM Lipase 1 OS=Psychrobacter immobilis GN=lip1 PE=1 SV=2:53.1434	-	KOG1454:Predicted hydrolase/acyltransferase (alpha/beta hydrolase superfamily)	hydrolase activity:GO:0016787
estExt_Genewise1.C_380094	estExt_Genewise1.C_380094	estExt_Genewise1.C_380094	scaffold_38:96419-99070	268.702	115.39	-1.21949	0.00910802	yes	116453	IPR000447:FAD-dependent glycerol-3-phosphate dehydrogenase;;IPR006076:FAD dependent oxidoreductase	sp|P43304|GPDM_HUMAN Glycerol-3-phosphate dehydrogenase, mitochondrial OS=Homo sapiens GN=GPD2 PE=1 SV=3:572.392	1.1.99.5:Glycerol-3-phosphate dehydrogenase.	KOG0042:Glycerol-3-phosphate dehydrogenase	glycerol-3-phosphate dehydrogenase activity:GO:0004368;;glycerol-3-phosphate dehydrogenase complex:GO:0009331;;glycerol-3-phosphate metabolic process:GO:0006072;;oxidoreductase activity:GO:0016491	01.05.02.07 sugar, glucoside, polyol and carboxylate catabolism	01.06.02.01 phospholipid metabolism	02.01 glycolysis and gluconeogenesis	20.01.15 electron transport	30.01 cellular signalling	30.05.01.12.05 insulin receptor signalling pathway	16.13 C-compound binding	16.17.01 calcium binding	16.21.05 FAD/FMN binding
estExt_fgenesh1_pm.C_380043	estExt_fgenesh1_pm.C_380043	estExt_fgenesh1_pm.C_380043	scaffold_38:118209-119959	45.7305	19.562	-1.2251	0.00566211	yes	139410	IPR005135:Endonuclease/exonuclease/phosphatase;;IPR015919:Cadherin-like	sp|Q9GUC9|YFEF9_CAEEL Uncharacterized protein F14F9.5 OS=Caenorhabditis elegans GN=F14F9.5 PE=1 SV=2:147.517	-	-	calcium ion binding:GO:0005509;;membrane:GO:0016020
estExt_Genemark1.C_100258	estExt_Genemark1.C_100258	estExt_Genemark1.C_100258	scaffold_10:951109-953099	86.0669	36.8117	-1.22529	0.00162256	yes	25213	IPR008984:SMAD/FHA domain;;IPR001841:Zinc finger, RING-type;;IPR000253:Forkhead-associated	sp|A6ZRW7|DMA2_YEAS7 E3 ubiquitin-protein ligase DMA2 OS=Saccharomyces cerevisiae (strain YJM789) GN=DMA2 PE=3 SV=1:241.121	3.2.1.18:Exo-alpha-sialidase.	KOG3872:FOG: FHA domain	zinc ion binding:GO:0008270;;protein binding:GO:0005515;;exo-alpha-sialidase activity:GO:0004308
estExt_Genewise1Plus.C_2_t10164	estExt_Genewise1Plus.C_2_t10164	estExt_Genewise1Plus.C_2_t10164	scaffold_2:144252-145386	226.69	96.6085	-1.2305	0.00167613	yes	95167	IPR004788:Ribose 5-phosphate isomerase	sp|Q6CFH4|RPIA_YARLI Ribose-5-phosphate isomerase OS=Yarrowia lipolytica (strain CLIB 122 / E 150) GN=RKI1 PE=3 SV=1:199.519	5.3.1.6:Ribose 5-phosphate epimerase.	KOG3075:Ribose 5-phosphate isomerase	ribose-5-phosphate isomerase activity:GO:0004751;;pentose-phosphate shunt, non-oxidative branch:GO:0009052	01.05 C-compound and carbohydrate metabolism	01.05.02 sugar, glucoside, polyol and carboxylate metabolism	01.05.02.04 sugar, glucoside, polyol and carboxylate anabolism S.cerevisiae	01.05.02.07 sugar, glucoside, polyol and carboxylate catabolism S.cerevisiae	02.01 glycolysis and gluconeogenesis	02.07 pentose-phosphate pathway	02.07.03 pentose-phosphate pathway non oxidative branch N.crassa
estExt_Genewise1Plus.C_350017	estExt_Genewise1Plus.C_350017	estExt_Genewise1Plus.C_350017	scaffold_35:23877-25343	163.799	69.3441	-1.24009	0.00385136	yes	104564	IPR001969:Peptidase aspartic, active site;;IPR001461:Peptidase A1;;IPR009007:Peptidase aspartic, catalytic	sp|O13340|CARP_PODAN Podosporapepsin OS=Podospora anserina GN=PAPA PE=2 SV=1:297.36	3.4.23.18:Aspergillopepsin I.	KOG1339:Aspartyl protease	aspartic-type endopeptidase activity:GO:0004190;;pepsin A activity:GO:0004194;;proteolysis:GO:0006508	01.25.03 extracellular protein degradation	14.13 protein/peptide degradation	14.13.04 lysosomal and vacuolar protein degradation N.crassa	42.27 extracellular / secretion proteins
estExt_Genemark1.C_180050	estExt_Genemark1.C_180050	estExt_Genemark1.C_180050	scaffold_18:144464-146337	91.8766	38.8557	-1.24157	0.00126206	yes	25983	IPR003097:FAD-binding, type 1;;IPR001433:Oxidoreductase FAD/NAD(P)-binding;;IPR001709:Flavoprotein pyridine nucleotide cytochrome reductase	sp|Q09744|YB63_SCHPO Uncharacterized FAD-binding protein C12C2.03c OS=Schizosaccharomyces pombe (strain ATCC 38366 / 972) GN=SPBC12C2.03c PE=2 SV=1:418.313	-	KOG1158:NADP/FAD dependent oxidoreductase	electron transport:GO:0006118;;[methionine synthase] reductase activity:GO:0030586;;oxidoreductase activity:GO:0016491
estExt_Genewise1Plus.C_18_t10099	estExt_Genewise1Plus.C_18_t10099	estExt_Genewise1Plus.C_18_t10099	scaffold_18:97614-102133	45.7722	19.3412	-1.24279	0.00145411	yes	102083	IPR001849:Pleckstrin-like;;IPR000904:SEC7-like	sp|O13817|SEC7C_SCHPO Protein transport protein sec73 OS=Schizosaccharomyces pombe (strain ATCC 38366 / 972) GN=sec73 PE=2 SV=2:298.901	-	KOG0929:Guanine nucleotide exchange factor	ARF guanyl-nucleotide exchange factor activity:GO:0005086;;regulation of ARF protein signal transduction:GO:0032012;;intracellular:GO:0005622	20.09.07 vesicular transport (Golgi network, etc.) N.crassa
estExt_Genewise1Plus.C_290276	estExt_Genewise1Plus.C_290276	estExt_Genewise1Plus.C_290276	scaffold_29:384806-386295	151.667	64.0006	-1.24475	0.00212506	yes	104197	IPR004827:Basic-leucine zipper (bZIP) transcription factor;;IPR011616:bZIP transcription factor, bZIP-1	sp|Q8X229|FCR3_CANAL Fluconazole resistance protein 3 OS=Candida albicans GN=FCR3 PE=3 SV=1:108.612	-	-	regulation of transcription, DNA-dependent:GO:0006355;;nucleus:GO:0005634;;transcription factor activity:GO:0003700;;protein dimerization activity:GO:0046983;;sequence-specific DNA binding:GO:0043565
gm1.3403_g	gm1.3403_g	gm1.3403_g	scaffold_6:1159580-1161204	170.928	72.1105	-1.2451	0.00124643	yes	7847	IPR009100:Acyl-CoA dehydrogenase/oxidase, middle and N-terminal;;IPR006091:Acyl-CoA dehydrogenase/oxidase, central region;;IPR009075:Acyl-CoA dehydrogenase/oxidase C-terminal;;IPR006090:Acyl-CoA oxidase/dehydrogenase, type 1	sp|Q5ZHT1|ACD11_CHICK Acyl-CoA dehydrogenase family member 11 OS=Gallus gallus GN=ACAD11 PE=2 SV=1:411.764	1.3.99.3:Acyl-CoA dehydrogenase.	KOG1469:Predicted acyl-CoA dehydrogenase	metabolic process:GO:0008152;;acyl-CoA dehydrogenase activity:GO:0003995;;electron transport:GO:0006118;;oxidoreductase activity, acting on the CH-CH group of donors:GO:0016627	01.04 phosphate metabolism	01.06 lipid, fatty acid and isoprenoid metabolism	01.06.05 fatty acid metabolism	02.25 oxidation of fatty acids	14.07.03 modification by phosphorylation, dephosphorylation, autophosphorylation	20.01.15 electron transport	16.21.05 FAD/FMN binding	18.01.01 regulation by modification	18.02 regulation of protein activity
estExt_Genewise1Plus.C_8_t10446	estExt_Genewise1Plus.C_8_t10446	estExt_Genewise1Plus.C_8_t10446	scaffold_8:573690-574723	99.5501	41.9809	-1.24569	0.00490099	yes	98934	-	-	-	KOG0977:Nuclear envelope protein lamin, intermediate filament superfamily	-
estExt_Genewise1Plus.C_7_t20236	estExt_Genewise1Plus.C_7_t20236	estExt_Genewise1Plus.C_7_t20236	scaffold_7:922953-924918	38.1985	16.054	-1.25058	0.00525815	yes	98439	IPR009091:Regulator of chromosome condensation/beta-lactamase-inhibitor protein II;;IPR000408:Regulator of chromosome condensation, RCC1	sp|P28745|RCC1_SCHPO Protein pim1 OS=Schizosaccharomyces pombe (strain ATCC 38366 / 972) GN=pim1 PE=1 SV=2:331.643	6.3.2.-:Acid--D-amino-acid ligases (peptide synthases).	KOG1426:FOG: RCC1 domain	coenzyme F420-0 gamma-glutamyl ligase activity:GO:0043773;;coenzyme F420-2 alpha-glutamyl ligase activity:GO:0043774;;ribosomal S6-glutamic acid ligase activity:GO:0018169;;UDP-N-acetylmuramoylalanyl-D-glutamyl-2,6-diaminopimelate-D-alanyl-D-alanine ligase activity:GO:0008766	10.03.01 mitotic cell cycle and cell cycle control N.crassa	10.03.01.03 cell cycle checkpoints (checkpoints of morphogenesis, DNA-damage,-replication, mitotic phase and spindle) N.crassa	11.04.01 rRNA processing	11.04.02 tRNA processing	11.04.03 mRNA processing (splicing, 5'-, 3'-end processing) S.cerevisiae	12.01 ribosome biogenesis	20.01.21 RNA transport	20.09.01 nuclear transport	30.01 cellular signalling	34.11.03.07 pheromone response, mating-type determination, sex-specific proteins N.crassa
e_gw1.2.1869.1	e_gw1.2.1869.1	e_gw1.2.1869.1	scaffold_2:1017219-1020822	24.5206	10.2969	-1.25178	0.0028668	yes	70929	-	-	-	KOG2992:Nucleolar GTPase/ATPase p130	-
e_gw1.10.496.1	e_gw1.10.496.1	e_gw1.10.496.1	scaffold_10:147976-150153	232.05	97.2948	-1.254	0.00166774	yes	80933	IPR011563:Cyclic-AMP phosphodiesterase/lactamase;;IPR000396:Cyclic-AMP phosphodiesterase, class-II	sp|P36599|PDE1_SCHPO 3&apos;,5&apos;-cyclic-nucleotide phosphodiesterase OS=Schizosaccharomyces pombe (strain ATCC 38366 / 972) GN=cgs2 PE=2 SV=1:127.872	3.1.4.17:3',5'-cyclic-nucleotide phosphodiesterase.	-	regulation of cyclic-nucleotide phosphodiesterase activity:GO:0051342;;3',5'-cyclic-nucleotide phosphodiesterase activity:GO:0004114;;cAMP catabolic process:GO:0006198;;3',5'-cyclic-AMP phosphodiesterase activity:GO:0004115	01.03.13 regulation of nucleotide/nucleoside/nucleobase metabolism N.crassa
estExt_fgenesh1_pm.C_1_t20448	estExt_fgenesh1_pm.C_1_t20448	estExt_fgenesh1_pm.C_1_t20448	scaffold_1:3193850-3196336	151.74	63.2527	-1.2624	0.00349344	yes	135659	IPR016035:Acyl transferase/acyl hydrolase/lysophospholipase;;IPR002641:Patatin	sp|P36165|TGL4_YEAST Lipase 4 OS=Saccharomyces cerevisiae (strain ATCC 204508 / S288c) GN=TGL4 PE=1 SV=1:418.698	-	KOG2214:Predicted esterase of the alpha-beta hydrolase superfamily	metabolic process:GO:0008152;;lipid metabolic process:GO:0006629	01.06 lipid, fatty acid and isoprenoid metabolism S.cerevisiae
estExt_Genewise1Plus.C_2_t20213	estExt_Genewise1Plus.C_2_t20213	estExt_Genewise1Plus.C_2_t20213	scaffold_2:850559-854054	53.2048	22.1288	-1.26563	0.000971889	yes	95408	IPR002885:Pentatricopeptide repeat	sp|Q76C99|RF1_ORYSI Protein Rf1, mitochondrial OS=Oryza sativa subsp. indica GN=Rf1 PE=2 SV=1:66.2402	-	KOG4197:FOG: PPR repeat	-	12.07 translational control
gm1.6708_g	gm1.6708_g	gm1.6708_g	scaffold_20:42280-43216	129.66	53.8654	-1.26731	0.00264123	yes	11152	IPR000342:Regulator of G protein signalling;;IPR000095:PAK-box/P21-Rho-binding;;IPR016137:Regulator of G protein signalling superfamily	-	-	-	signal transducer activity:GO:0004871
estExt_fgenesh1_pm.C_360052	estExt_fgenesh1_pm.C_360052	estExt_fgenesh1_pm.C_360052	scaffold_36:161339-162852	105.354	43.7099	-1.26921	0.00111907	yes	139366	IPR006088:Sterol desaturase	sp|P38992|SUR2_YEAST Sphingolipid C4-hydroxylase SUR2 OS=Saccharomyces cerevisiae (strain ATCC 204508 / S288c) GN=SUR2 PE=1 SV=1:266.929	1.14.-.-:Acting on paired donors, with incorporation or reduction of	KOG0874:Sphingolipid hydroxylase	hydroxymethylsilanetriol oxidase activity:GO:0018598;;fluorene oxygenase activity:GO:0018585;;tert-butyl alcohol 2-monooxygenase activity:GO:0018594;;4-chlorophenoxyacetate monooxygenase activity:GO:0018593;;di-n-butyltin dioxygenase activity:GO:0018589;;mono-butyltin dioxygenase activity:GO:0018586;;metabolic process:GO:0008152;;catalytic activity:GO:0003824;;2-hydroxyisobutyrate 3-monooxygenase…	01.06 lipid, fatty acid and isoprenoid metabolism N.crassa
estExt_fgenesh1_pm.C_400037	estExt_fgenesh1_pm.C_400037	estExt_fgenesh1_pm.C_400037	scaffold_40:106843-109333	205.031	84.8858	-1.27225	0.00185129	yes	139450	IPR002293:Amino acid/polyamine transporter I;;IPR004841:Amino acid permease-associated region	sp|P53388|DIP5_YEAST Dicarboxylic amino acid permease OS=Saccharomyces cerevisiae (strain ATCC 204508 / S288c) GN=DIP5 PE=1 SV=1:550.821	-	KOG1286:Amino acid transporters	amino acid transmembrane transporter activity:GO:0015171;;transport:GO:0006810;;membrane:GO:0016020;;amino acid transport:GO:0006865	20.01.07 amino acid/amino acid derivatives transport S.cerevisiae	20.09.18.07 non-vesicular cellular import
fgenesh2_kg.20_#_16_#_gi|38130737|gb|CF876055.1|CF876055	fgenesh2_kg.20_#_16_#_gi|38130737|gb|CF876055.1|CF876055	fgenesh2_kg.20_#_16_#_gi|38130737|gb|CF876055.1|CF876055	scaffold_20:84809-85213	418.516	171.53	-1.28682	0.00354476	yes
e_gw1.15.543.1	e_gw1.15.543.1	e_gw1.15.543.1	scaffold_15:212762-215562	55.5654	22.6258	-1.29622	0.00148044	yes	84505	IPR000909:Phospholipase C, phosphatidylinositol-specific , X region;;IPR001192:Phospholipase C, phosphoinositol-specific, C-terminal (PLC);;IPR008973:C2 calcium/lipid-binding region, CaLB;;IPR013841:Phospholipase C, phosphatidylinositol-specific , X and Y boxes;;IPR001711:Phospholipase C, phosphatidylinositol-specific, Y domain	sp|P40977|PLC1_SCHPO 1-phosphatidylinositol-4,5-bisphosphate phosphodiesterase 1 OS=Schizosaccharomyces pombe (strain ATCC 38366 / 972) GN=plc1 PE=1 SV=1:174.866;;sp|P40977|PLC1_SCHPO 1-phosphatidylinositol-4,5-bisphosphate phosphodiesterase 1 OS=Schizosaccharomyces pombe (strain ATCC 38366 / 972) GN=plc1 PE=1 SV=1:67.3958	3.1.4.11:1-phosphatidylinositol-4,5-bisphosphate phosphodiesterase.	KOG0169:Phosphoinositide-specific phospholipase C	phosphoinositide phospholipase C activity:GO:0004435;;signal transduction:GO:0007165;;phospholipase C activity:GO:0004629;;lipid metabolic process:GO:0006629;;intracellular signaling cascade:GO:0007242	01.06 lipid, fatty acid and isoprenoid metabolism N.crassa	30.01.09.11 polyphosphoinositol mediated signal transduction N.crassa
estExt_Genewise1.C_3_t30356	estExt_Genewise1.C_3_t30356	estExt_Genewise1.C_3_t30356	scaffold_3:1605094-1607201	38.681	15.7419	-1.29702	0.00410902	yes	108243	-	-	-	KOG3417:Ras1 guanine nucleotide exchange factor	-
e_gw1.1.1853.1	e_gw1.1.1853.1	e_gw1.1.1853.1	scaffold_1:2713418-2714511	155.332	63.208	-1.29718	0.00270469	yes
e_gw1.12.485.1	e_gw1.12.485.1	e_gw1.12.485.1	scaffold_12:682367-683615	132.106	53.6871	-1.29905	0.0014098	yes	81999	IPR001138:Fungal transcriptional regulatory protein, N-terminal	sp|O93870|FCR1_CANAL Fluconazole resistance protein 1 OS=Candida albicans GN=FCR1 PE=4 SV=1:77.411	-	-	regulation of transcription, DNA-dependent:GO:0006355;;nucleus:GO:0005634;;zinc ion binding:GO:0008270;;transcription factor activity:GO:0003700	11.02.03.04 transcriptional control	32.05.01.03 chemical agent resistance
gw1.14.616.1	gw1.14.616.1	gw1.14.616.1	scaffold_14:241905-242929	435.982	176.722	-1.30278	0.00150801	yes	66752	IPR000757:Glycoside hydrolase, family 16;;IPR008985:Concanavalin A-like lectin/glucanase	sp|Q8J0P4|CRF1_ASPFU Probable glycosidase crf1 OS=Neosartorya fumigata (strain ATCC MYA-4609 / Af293 / CBS 101355 / FGSC A1100) GN=crf1 PE=1 SV=2:248.825	3.2.1.73:Licheninase.	-	licheninase activity:GO:0042972;;hydrolase activity, hydrolyzing O-glycosyl compounds:GO:0004553;;carbohydrate metabolic process:GO:0005975	42.01 cell wall
e_gw1.20.347.1	e_gw1.20.347.1	e_gw1.20.347.1	scaffold_20:164416-165573	292.131	118.362	-1.30341	0.00147494	yes	86910	-	sp|Q10296|YD42_SCHPO Uncharacterized protein C22H10.02 OS=Schizosaccharomyces pombe (strain ATCC 38366 / 972) GN=SPAC22H10.02 PE=1 SV=1:50.0618	-	-	-
estExt_Genewise1Plus.C_15_t10362	estExt_Genewise1Plus.C_15_t10362	estExt_Genewise1Plus.C_15_t10362	scaffold_15:473293-476058	60.0698	24.2787	-1.30695	0.000672716	yes	101443	IPR011046:WD40 repeat-like;;IPR006172:DNA-directed DNA polymerase, family B;;IPR001680:WD40 repeat	sp|Q9P382|NUP82_SCHPO Nucleoporin nup82 OS=Schizosaccharomyces pombe (strain ATCC 38366 / 972) GN=nup82 PE=2 SV=1:58.9214	-	-	DNA-directed DNA polymerase activity:GO:0003887;;nucleic acid binding:GO:0003676;;nucleotide binding:GO:0000166;;nucleobase, nucleoside, nucleotide and nucleic acid metabolic process:GO:0006139
estExt_Genewise1Plus.C_360043	estExt_Genewise1Plus.C_360043	estExt_Genewise1Plus.C_360043	scaffold_36:53716-54871	93.4234	37.6827	-1.30988	0.00214833	yes	104664	IPR006088:Sterol desaturase	sp|Q7SBB6|ERG3_NEUCR Probable C-5 sterol desaturase OS=Neurospora crassa GN=NCU06207 PE=3 SV=1:511.531	1.3.-.-:Acting on the CH-CH group of donors.	KOG0872:Sterol C5 desaturase	peptidyl-oxazoline dehydrogenase activity:GO:0018129;;2-hydroxycyclohexane-1-carboxyl-CoA dehydrogenase activity:GO:0018495;;2,6-dihydroxycyclohexane-1-carboxyl-CoA dehydrogenase activity:GO:0018496;;peptidyl-thiazoline dehydrogenase activity:GO:0018136;;metabolic process:GO:0008152;;phytoene dehydrogenase activity:GO:0016166;;1-chloro-2,2-bis(4-chlorophenyl)ethane dehydrogenase activity:GO:00184…	01.06 lipid, fatty acid and isoprenoid metabolism N.crassa	01.06.06.11 tetracyclic and pentacyclic triterpenes (cholesterin, steroids and hopanoids) metabolism S.cerevisiae	16.17.09 heavy metal binding (Cu, Fe, Zn)
fgenesh1_pm.29_#_101	fgenesh1_pm.29_#_101	fgenesh1_pm.29_#_101	scaffold_29:372603-373876	60.0569	24.2212	-1.31006	0.00647715	yes
e_gw1.8.166.1	e_gw1.8.166.1	e_gw1.8.166.1	scaffold_8:1110683-1113112	39.9122	16.0522	-1.31406	0.00174962	yes	79162	IPR013094:Alpha/beta hydrolase fold-3	sp|Q68J42|LIPS_PIG Hormone-sensitive lipase OS=Sus scrofa GN=LIPE PE=2 SV=1:90.8929	-	KOG4388:Hormone-sensitive lipase HSL	metabolic process:GO:0008152;;hydrolase activity:GO:0016787;;hormone-sensitive lipase activity:GO:0033878	01.06 lipid, fatty acid and isoprenoid metabolism N.crassa
e_gw1.9.665.1	e_gw1.9.665.1	e_gw1.9.665.1	scaffold_9:1072359-1072974	199.438	80.1976	-1.31431	0.00369029	yes	80148	IPR015141:Phospholipase A2, prokaryotic/fungal;;IPR016090:Phospholipase A2	-	-	-	-
e_gw1.15.85.1	e_gw1.15.85.1	e_gw1.15.85.1	scaffold_15:520909-522885	97.1423	38.9854	-1.31717	0.000755534	yes	84151	IPR001128:Cytochrome P450;;IPR002401:Cytochrome P450, E-class, group I	sp|P10615|CP52A_CANTR Cytochrome P450 52A1 OS=Candida tropicalis GN=CYP52A1 PE=1 SV=3:276.559	1.14.14.1:Unspecific monooxygenase.	KOG0157:Cytochrome P450 CYP4/CYP19/CYP26 subfamilies	electron transport:GO:0006118;;unspecific monooxygenase activity:GO:0050381;;heme binding:GO:0020037;;monooxygenase activity:GO:0004497;;iron ion binding:GO:0005506	01.06 lipid, fatty acid and isoprenoid metabolism N.crassa	01.20.05.03 metabolism of alkanes, alkenes, alkanals, alkanols N.crassa
e_gw1.2.1212.1	e_gw1.2.1212.1	e_gw1.2.1212.1	scaffold_2:642685-643724	256.949	103.044	-1.31822	0.000573128	yes	70990	IPR000659:Pyridoxamine 5'-phosphate oxidase;;IPR011576:Pyridoxamine 5'-phosphate oxidase-related, FMN-binding core;;IPR009002:FMN-binding split barrel, related	sp|P38075|PDX3_YEAST Pyridoxamine 5&apos;-phosphate oxidase OS=Saccharomyces cerevisiae (strain ATCC 204508 / S288c) GN=PDX3 PE=1 SV=1:224.557	1.4.3.5:Pyridoxamine-phosphate oxidase.	KOG2586:Pyridoxamine-phosphate oxidase	pyridoxamine-phosphate oxidase activity:GO:0004733;;pyridoxine biosynthetic process:GO:0008615;;FMN binding:GO:0010181	01.06 lipid, fatty acid and isoprenoid metabolism S.cerevisiae	01.07.01 biosynthesis of vitamins, cofactors, and prosthetic groups N.crassa
e_gw1.1.3027.1	e_gw1.1.3027.1	e_gw1.1.3027.1	scaffold_1:1622569-1624534	46.6952	18.6628	-1.32311	0.00159742	yes	70135	IPR008862:T-complex 11	sp|P40317|SOK1_YEAST Protein SOK1 OS=Saccharomyces cerevisiae (strain ATCC 204508 / S288c) GN=SOK1 PE=1 SV=2:204.912	-	KOG1981:SOK1 kinase belonging to the STE20/SPS1/GC kinase family	-	11.02.03.04 transcriptional control
estExt_Genewise1.C_300130	estExt_Genewise1.C_300130	estExt_Genewise1.C_300130	scaffold_30:125827-128025	210.125	83.831	-1.3257	0.00193957	yes	115870	IPR011701:Major facilitator superfamily MFS-1;;IPR016196:MFS general substrate transporter	sp|P39980|SIT1_YEAST Siderophore iron transporter 1 OS=Saccharomyces cerevisiae (strain ATCC 204508 / S288c) GN=SIT1 PE=2 SV=1:509.22	-	KOG0254:Predicted transporter (major facilitator superfamily)	-	01.07 metabolism of vitamins, cofactors, and prosthetic groups S.cerevisiae	20.01.01.01.01.01 siderophore-iron transport	20.01.27 drug/toxin transport	20.09.18 cellular import	20.09.18.07 non-vesicular cellular import	32.07 detoxification	34.01.01.01 homeostasis of metal ions (Na, K, Ca etc.) S.cerevisiae	20.03 transport facilities	20.03.22 transport ATPases	20.03.25 ABC transporters
estExt_Genewise1.C_1_t20224	estExt_Genewise1.C_1_t20224	estExt_Genewise1.C_1_t20224	scaffold_1:921400-924287	114.347	45.5271	-1.32862	0.000650096	yes	105633	IPR001762:Blood coagulation inhibitor, Disintegrin;;IPR006586:ADAM, cysteine-rich;;IPR001590:Peptidase M12B, ADAM/reprolysin	sp|Q4WQ08|ADMB_ASPFU Disintegrin and metalloproteinase domain-containing protein B OS=Neosartorya fumigata (strain ATCC MYA-4609 / Af293 / CBS 101355 / FGSC A1100) GN=ADM-B PE=3 SV=2:674.855	3.4.24.-:Metalloendopeptidases.	KOG3607:Meltrins, fertilins and related Zn-dependent metalloproteinases of the ADAMs family	collagenase activity:GO:0008133;;prenyl protein specific endopeptidase activity:GO:0008319;;stromelysin 3 activity:GO:0004249;;proteolysis:GO:0006508;;matrilysin-2 activity:GO:0030402;;metalloendopeptidase activity:GO:0004222
gm1.172_g	gm1.172_g	gm1.172_g	scaffold_1:627774-628967	78.8857	31.4	-1.329	0.00223897	yes	4616	IPR016040:NAD(P)-binding;;IPR002347:Glucose/ribitol dehydrogenase;;IPR002198:Short-chain dehydrogenase/reductase SDR	sp|Q8N3Y7|RDHE2_HUMAN Epidermal retinol dehydrogenase 2 OS=Homo sapiens GN=SDR16C5 PE=2 SV=2:135.961	1.1.-.-:Acting on the CH-OH group of donors.	KOG1201:Hydroxysteroid 17-beta dehydrogenase 11	ketoreductase activity:GO:0045703;;hydroxymethylmethylsilanediol oxidase activity:GO:0018448;;1-phenylethanol dehydrogenase activity:GO:0018449;;metabolic process:GO:0008152;;catalytic activity:GO:0003824;;myrtenol dehydrogenase activity:GO:0018450;;oxidoreductase activity:GO:0016491;;binding:GO:0005488;;pinocarveol dehydrogenase activity:GO:0018446;;chloral hydrate dehydrogenase activity:GO:0018…
gm1.6389_g	gm1.6389_g	gm1.6389_g	scaffold_18:247524-248474	64.4035	25.5762	-1.33234	0.00708643	yes	10833	IPR016040:NAD(P)-binding;;IPR002347:Glucose/ribitol dehydrogenase;;IPR002198:Short-chain dehydrogenase/reductase SDR	sp|Q9RPT1|RHLG_PSEAE Rhamnolipids biosynthesis 3-oxoacyl-[acyl-carrier-protein] reductase OS=Pseudomonas aeruginosa GN=rhlG PE=1 SV=1:179.104	1.1.1.100:3-oxoacyl-[acyl-carrier protein] reductase.	KOG0725:Reductases with broad range of substrate specificities	metabolic process:GO:0008152;;3-oxoacyl-[acyl-carrier-protein] reductase activity:GO:0004316;;catalytic activity:GO:0003824;;binding:GO:0005488;;oxidoreductase activity:GO:0016491	01.05 C-compound and carbohydrate metabolism	01.06.02.02 glycolipid metabolism	01.06.05 fatty acid metabolism	01.20.01.05 metabolism of sugar alcohols	01.20.35.01.01 metabolism of melanins
fgenesh1_pg.1_#_44	fgenesh1_pg.1_#_44	fgenesh1_pg.1_#_44	scaffold_1:181159-184037	61.8429	24.559	-1.33236	0.000431803	yes
estExt_fgenesh1_pm.C_1_t20495	estExt_fgenesh1_pm.C_1_t20495	estExt_fgenesh1_pm.C_1_t20495	scaffold_1:3334787-3336251	95.8985	38.0794	-1.3325	0.00103087	yes	135686	IPR009486:Purine nucleoside permease	sp|O74493|YCR5_SCHPO Uncharacterized protein C285.05 OS=Schizosaccharomyces pombe (strain ATCC 38366 / 972) GN=SPCC285.05 PE=2 SV=1:224.942	-	-	-	20.01.17 nucleotide/nucleoside/nucleobase transport N.crassa
gm1.4611_g	gm1.4611_g	gm1.4611_g	scaffold_10:561181-563254	234.513	92.9495	-1.33515	0.00111582	yes	9055	IPR000374:Phosphatidate cytidylyltransferase	sp|P87170|DGK1_SCHPO CTP-dependent diacylglycerol kinase 1 OS=Schizosaccharomyces pombe (strain ATCC 38366 / 972) GN=ptp4 PE=2 SV=1:191.43	-	KOG4453:Predicted ER membrane protein	phospholipid biosynthetic process:GO:0008654;;phosphatidate cytidylyltransferase activity:GO:0004605;;membrane:GO:0016020
estExt_Genewise1Plus.C_3_t10415	estExt_Genewise1Plus.C_3_t10415	estExt_Genewise1Plus.C_3_t10415	scaffold_3:478749-480192	71.2388	28.2116	-1.33638	0.0015256	yes
estExt_fgenesh1_pm.C_90216	estExt_fgenesh1_pm.C_90216	estExt_fgenesh1_pm.C_90216	scaffold_9:756460-757603	53.4695	21.1625	-1.33721	0.00926558	yes	137364	IPR016040:NAD(P)-binding;;IPR002347:Glucose/ribitol dehydrogenase;;IPR002198:Short-chain dehydrogenase/reductase SDR	sp|Q8MJY8|PGDH_MACFA 15-hydroxyprostaglandin dehydrogenase [NAD+] OS=Macaca fascicularis GN=HPGD PE=2 SV=1:95.9005	1.1.1.141:15-hydroxyprostaglandin dehydrogenase (NAD+).	KOG4169:15-hydroxyprostaglandin dehydrogenase and related dehydrogenases	metabolic process:GO:0008152;;catalytic activity:GO:0003824;;binding:GO:0005488;;oxidoreductase activity:GO:0016491;;15-hydroxyprostaglandin dehydrogenase (NAD+) activity:GO:0016404	01.05 C-compound and carbohydrate metabolism	01.06.02.02 glycolipid metabolism	01.06.05 fatty acid metabolism	02.07 pentose-phosphate pathway
gm1.6630_g	gm1.6630_g	gm1.6630_g	scaffold_19:442059-442677	115.689	45.7439	-1.3386	0.00973876	yes
gw1.18.150.1	gw1.18.150.1	gw1.18.150.1	scaffold_18:550703-551936	47.1398	18.6119	-1.34072	0.00490099	yes	46596	IPR013216:Methyltransferase type 11	-	-	-	metabolic process:GO:0008152;;methyltransferase activity:GO:0008168
estExt_Genewise1Plus.C_1_t30025	estExt_Genewise1Plus.C_1_t30025	estExt_Genewise1Plus.C_1_t30025	scaffold_1:1356922-1359515	19.511	7.69933	-1.34148	0.00647715	yes	94195	-	-	6.3.2.-:Acid--D-amino-acid ligases (peptide synthases).	KOG1869:Splicing coactivator SRm160/300, subunit SRm300	coenzyme F420-0 gamma-glutamyl ligase activity:GO:0043773;;coenzyme F420-2 alpha-glutamyl ligase activity:GO:0043774;;ribosomal S6-glutamic acid ligase activity:GO:0018169;;UDP-N-acetylmuramoylalanyl-D-glutamyl-2,6-diaminopimelate-D-alanyl-D-alanine ligase activity:GO:0008766
estExt_Genewise1Plus.C_4_t10493	estExt_Genewise1Plus.C_4_t10493	estExt_Genewise1Plus.C_4_t10493	scaffold_4:572290-575703	105.797	41.4463	-1.35199	0.000648752	yes	96862	IPR006153:Sodium/hydrogen exchanger;;IPR013928:Alkali metal cation/H+ antiporter Nha1, C-terminal	sp|Q99271|NAH1_YEAST Na(+)/H(+) antiporter OS=Saccharomyces cerevisiae (strain ATCC 204508 / S288c) GN=NHA1 PE=1 SV=1:579.326	-	KOG4505:Na+/H+ antiporter	solute:hydrogen antiporter activity:GO:0015299;;regulation of pH:GO:0006885;;integral to membrane:GO:0016021	20.01.01.01 cation transport (H+, Na+, K+, Ca2+ , NH4+, etc.) N.crassa	32.01.03 osmotic and salt stress response	34.01.01.01 homeostasis of metal ions (Na, K, Ca etc.) N.crassa	34.01.01.03 homeostasis of protons	20.03.02.03 antiporter
e_gw1.7.511.1	e_gw1.7.511.1	e_gw1.7.511.1	scaffold_7:334747-337392	18.2949	7.16602	-1.3522	0.00682519	yes	78203	IPR000504:RNA recognition motif, RNP-1;;IPR004154:Anticodon-binding	sp|Q10145|YAS9_SCHPO Uncharacterized RNA-binding protein C3H8.09c OS=Schizosaccharomyces pombe (strain ATCC 38366 / 972) GN=SPAC3H8.09c PE=2 SV=1:122.479	-	KOG0118:FOG: RRM domain	nucleic acid binding:GO:0003676;;ATP binding:GO:0005524;;translation:GO:0006412;;aminoacyl-tRNA ligase activity:GO:0004812	16.03.03 RNA binding
estExt_Genemark1.C_40417	estExt_Genemark1.C_40417	estExt_Genemark1.C_40417	scaffold_4:1530720-1539932	19.2343	7.49788	-1.35913	0.00462423	yes	24302	IPR011510:Sterile alpha motif homology 2;;IPR001849:Pleckstrin-like;;IPR010993:Sterile alpha motif homology;;IPR001660:Sterile alpha motif SAM	-	-	KOG2043:Signaling protein SWIFT and related BRCT domain proteins	-
gw1.1.728.1	gw1.1.728.1	gw1.1.728.1	scaffold_1:3027666-3028929	39.9248	15.548	-1.36055	0.00557642	yes
estExt_fgenesh2_kg.C_130033	estExt_fgenesh2_kg.C_130033	estExt_fgenesh2_kg.C_130033	scaffold_13:346180-347147	923.905	359.405	-1.36213	0.00384816	yes
estExt_Genewise1.C_300128	estExt_Genewise1.C_300128	estExt_Genewise1.C_300128	scaffold_30:122505-124706	248.646	96.4406	-1.36638	0.00103468	yes	115868	IPR012132:Glucose-methanol-choline oxidoreductase;;IPR007867:Glucose-methanol-choline oxidoreductase, C-terminal;;IPR000172:Glucose-methanol-choline oxidoreductase, N-terminal	sp|P04841|ALOX_PICAN Alcohol oxidase OS=Pichia angusta GN=MOX PE=3 SV=1:452.981	1.1.99.1:Choline dehydrogenase.	KOG1238:Glucose dehydrogenase/choline dehydrogenase/mandelonitrile lyase (GMC oxidoreductase family)	oxidoreductase activity, acting on CH-OH group of donors:GO:0016614;;FAD binding:GO:0050660;;alcohol metabolic process:GO:0006066;;choline dehydrogenase activity:GO:0008812	01.01.09.01.01 biosynthesis of glycine	01.05 C-compound and carbohydrate metabolism	01.20.17.03 metabolism of amines	20.01.15 electron transport	16.21.05 FAD/FMN binding	16.21.07 NAD/NADP binding
gw1.1.1037.1	gw1.1.1037.1	gw1.1.1037.1	scaffold_1:2025746-2027090	35.6469	13.8221	-1.3668	0.00725166	yes	48843	IPR007087:Zinc finger, C2H2-type;;IPR015880:Zinc finger, C2H2-like	-	-	KOG2992:Nucleolar GTPase/ATPase p130	nucleic acid binding:GO:0003676;;zinc ion binding:GO:0008270;;intracellular:GO:0005622
fgenesh2_kg.12_#_50_#_gi|38140149|gb|CF885467.1|CF885467	fgenesh2_kg.12_#_50_#_gi|38140149|gb|CF885467.1|CF885467	fgenesh2_kg.12_#_50_#_gi|38140149|gb|CF885467.1|CF885467	scaffold_12:414955-415664	787.06	304.933	-1.36798	0.00160756	yes
estExt_Genemark1.C_170014	estExt_Genemark1.C_170014	estExt_Genemark1.C_170014	scaffold_17:66753-68758	409.808	158.215	-1.37306	0.00221641	yes	25900	IPR002129:Pyridoxal phosphate-dependent decarboxylase;;IPR015424:Pyridoxal phosphate-dependent transferase, major region	sp|Q05567|SGPL_YEAST Sphingosine-1-phosphate lyase OS=Saccharomyces cerevisiae (strain ATCC 204508 / S288c) GN=DPL1 PE=1 SV=1:494.197	4.1.2.27:Sphinganine-1-phosphate aldolase.	KOG1383:Glutamate decarboxylase/sphingosine phosphate lyase	pyridoxal phosphate binding:GO:0030170;;carboxy-lyase activity:GO:0016831;;sphinganine-1-phosphate aldolase activity:GO:0008117;;carboxylic acid metabolic process:GO:0019752	01.02.02 nitrogen metabolism	01.05 C-compound and carbohydrate metabolism	01.06 lipid, fatty acid and isoprenoid metabolism N.crassa	30.01.09.03 Ca2+ mediated signal transduction	32.01.11 nutrient starvation response	40.10.02 apoptosis (type I programmed cell death) &nbsp;
gm1.4302_g	gm1.4302_g	gm1.4302_g	scaffold_9:503645-506148	26.3638	10.1593	-1.37576	0.00304955	yes	8746	IPR004308:Glutamate-cysteine ligase catalytic subunit	sp|Q8X0X0|GSH1_NEUCR Glutamate--cysteine ligase OS=Neurospora crassa GN=gcs-1 PE=3 SV=1:1043.49	6.3.2.2:Glutamate--cysteine ligase.	KOG3754:Gamma-glutamylcysteine synthetase	glutamate-cysteine ligase complex:GO:0017109;;glutamate-cysteine ligase activity:GO:0004357;;glutathione biosynthetic process:GO:0006750	01.01.03.02 metabolism of glutamate	01.01.09.03 metabolism of cysteine	01.05.02 sugar, glucoside, polyol and carboxylate metabolism	01.07 metabolism of vitamins, cofactors, and prosthetic groups	01.07.01 biosynthesis of vitamins, cofactors, and prosthetic groups	01.20.37.01 metabolism of thioredoxin, glutaredoxin, glutathion N.crassa	32.05.01.03.03 inorganic chemical agent resistance (e.g. heavy metals) S.cerevisiae	32.07 detoxification	34.11.13.07 circulation (e.g. blood pressure)	16.01 protein binding
fgenesh1_pm.1_#_888	fgenesh1_pm.1_#_888	fgenesh1_pm.1_#_888	scaffold_1:3033116-3034054	105.279	40.4729	-1.37919	0.00293159	yes
e_gw1.18.76.1	e_gw1.18.76.1	e_gw1.18.76.1	scaffold_18:94012-95563	70.5478	26.8877	-1.39165	0.000573128	yes	86187	IPR000834:Peptidase M14, carboxypeptidase A;;IPR009020:Proteinase inhibitor, propeptide	sp|C5FPR9|Y4493_ARTOC Putative metallocarboxypeptidase MCYG_04493 OS=Arthroderma otae (strain CBS 113480) GN=MCYG_04493 PE=3 SV=1:436.417	-	KOG2650:Zinc carboxypeptidase	zinc ion binding:GO:0008270;;carboxypeptidase A activity:GO:0004182;;proteolysis:GO:0006508	42.01 cell wall
fgenesh2_kg.3_#_77_#_gi|30113877|gb|CB899219.1|CB899219	fgenesh2_kg.3_#_77_#_gi|30113877|gb|CB899219.1|CB899219	fgenesh2_kg.3_#_77_#_gi|30113877|gb|CB899219.1|CB899219	scaffold_3:520705-521200	240.49	91.5856	-1.39278	0.00223897	yes	117941	-	-	-	KOG4210:Nuclear localization sequence binding protein	-
estExt_Genemark1.C_100112	estExt_Genemark1.C_100112	estExt_Genemark1.C_100112	scaffold_10:431043-435310	63.8451	24.3098	-1.39304	0.000438884	yes	25140	IPR015880:Zinc finger, C2H2-like	-	-	KOG1721:FOG: Zn-finger	zinc ion binding:GO:0008270;;intracellular:GO:0005622
estExt_fgenesh1_pm.C_60063	estExt_fgenesh1_pm.C_60063	estExt_fgenesh1_pm.C_60063	scaffold_6:189806-192115	57.2361	21.7847	-1.39361	0.000379832	yes	136720	IPR012878:Protein of unknown function DUF1680;;IPR008928:Six-hairpin glycosidase-like	-	-	-	catalytic activity:GO:0003824
estExt_Genewise1Plus.C_350140	estExt_Genewise1Plus.C_350140	estExt_Genewise1Plus.C_350140	scaffold_35:163878-167625	16.4141	6.2335	-1.39682	0.00251949	yes	104635	IPR001965:Zinc finger, PHD-type;;IPR006058:2Fe-2S ferredoxin, iron-sulphur binding site;;IPR000967:Zinc finger, NF-X1-type;;IPR001374:Single-stranded nucleic acid binding R3H	sp|O74853|FAP1H_SCHPO FKBP12-associated protein 1 homolog OS=Schizosaccharomyces pombe (strain ATCC 38366 / 972) GN=fap1 PE=1 SV=1:578.941	6.3.2.-:Acid--D-amino-acid ligases (peptide synthases).	KOG1952:Transcription factor NF-X1, contains NFX-type Zn2+-binding and R3H domains	regulation of transcription, DNA-dependent:GO:0006355;;nucleus:GO:0005634;;coenzyme F420-0 gamma-glutamyl ligase activity:GO:0043773;;protein binding:GO:0005515;;transcription factor activity:GO:0003700;;UDP-N-acetylmuramoylalanyl-D-glutamyl-2,6-diaminopimelate-D-alanyl-D-alanine ligase activity:GO:0008766;;nucleic acid binding:GO:0003676;;zinc ion binding:GO:0008270;;electron transport:GO:000611…
gm1.4076_g	gm1.4076_g	gm1.4076_g	scaffold_8:762898-763468	257.128	97.3541	-1.40118	0.00198292	yes
estExt_fgenesh1_pg.C_1_t20380	estExt_fgenesh1_pg.C_1_t20380	estExt_fgenesh1_pg.C_1_t20380	scaffold_1:3332147-3334574	89.0204	33.3515	-1.41639	0.000227393	yes	139998	IPR017442:Serine/threonine protein kinase-related;;IPR000719:Protein kinase, core;;IPR002290:Serine/threonine protein kinase;;IPR011009:Protein kinase-like;;IPR008271:Serine/threonine protein kinase, active site;;IPR001245:Tyrosine protein kinase	sp|Q54RJ4|IKSA_DICDI Probable serine/threonine-protein kinase iksA OS=Dictyostelium discoideum GN=iksA PE=3 SV=1:195.282	-	KOG0032:Ca2+/calmodulin-dependent protein kinase, EF-Hand protein superfamily	protein-tyrosine kinase activity:GO:0004713;;ATP binding:GO:0005524;;protein kinase activity:GO:0004672;;protein serine/threonine kinase activity:GO:0004674;;protein amino acid phosphorylation:GO:0006468	14.07.03 modification by phosphorylation, dephosphorylation, autophosphorylation N.crassa	30.01 cellular signalling
gm1.6242_g	gm1.6242_g	gm1.6242_g	scaffold_17:427473-429160	158.486	59.0416	-1.42455	0.000162063	yes	10686	IPR016181:Acyl-CoA N-acyltransferase	sp|Q9UUE3|YNZ6_SCHPO Putative lysine N-acyltransferase C17G9.06c OS=Schizosaccharomyces pombe (strain ATCC 38366 / 972) GN=SPBC17G9.06c PE=2 SV=1:127.487	-	KOG0672:Halotolerance protein HAL3 (contains flavoprotein domain)	-	01.05 C-compound and carbohydrate metabolism	01.20 secondary metabolism
estExt_Genewise1Plus.C_7_t10493	estExt_Genewise1Plus.C_7_t10493	estExt_Genewise1Plus.C_7_t10493	scaffold_7:602725-604343	102.479	38.1579	-1.42527	0.000244203	yes
estExt_Genewise1Plus.C_5_t10370	estExt_Genewise1Plus.C_5_t10370	estExt_Genewise1Plus.C_5_t10370	scaffold_5:456168-458522	374.624	138.653	-1.43396	0.00164536	yes	97355	IPR002110:Ankyrin	sp|Q99NH0|ANR17_MOUSE Ankyrin repeat domain-containing protein 17 OS=Mus musculus GN=Ankrd17 PE=1 SV=2:106.686;;sp|Q99NH0|ANR17_MOUSE Ankyrin repeat domain-containing protein 17 OS=Mus musculus GN=Ankrd17 PE=1 SV=2:140.969;;sp|Q99NH0|ANR17_MOUSE Ankyrin repeat domain-containing protein 17 OS=Mus musculus GN=Ankrd17 PE=1 SV=2:60.8474;;sp|Q99NH0|ANR17_MOUSE Ankyrin repeat domain-containing protein …	-	KOG4177:Ankyrin	-
estExt_fgenesh1_pg.C_100064	estExt_fgenesh1_pg.C_100064	estExt_fgenesh1_pg.C_100064	scaffold_10:242965-247067	77.8581	28.8089	-1.43433	0.000117482	yes	141527	IPR001965:Zinc finger, PHD-type;;IPR011011:Zinc finger, FYVE/PHD-type	sp|Q9BVI0|PHF20_HUMAN PHD finger protein 20 OS=Homo sapiens GN=PHF20 PE=1 SV=2:64.3142	-	KOG1844:PHD Zn-finger proteins	zinc ion binding:GO:0008270;;protein binding:GO:0005515
estExt_Genewise1Plus.C_2_t30204	estExt_Genewise1Plus.C_2_t30204	estExt_Genewise1Plus.C_2_t30204	scaffold_2:1490563-1493499	61.7258	22.8368	-1.43451	0.000126602	yes	95662	IPR003445:Cation transporter;;IPR004773:Potassium transport protein, high-affinity	sp|P28584|TRK2_YEAST Low-affinity potassium transport protein OS=Saccharomyces cerevisiae (strain ATCC 204508 / S288c) GN=TRK2 PE=1 SV=1:525.398	-	KOG1341:Na+/K+ transporter	potassium ion transport:GO:0006813;;cation transmembrane transporter activity:GO:0008324;;cation transport:GO:0006812;;integral to membrane:GO:0016021;;potassium ion transmembrane transporter activity:GO:0015079	20.01.01.01 cation transport (H+, Na+, K+, Ca2+ , NH4+, etc.) N.crassa	20.09.18 cellular import	20.09.18.07 non-vesicular cellular import	34.01.01.01 homeostasis of metal ions (Na, K, Ca etc.) N.crassa
estExt_Genewise1Plus.C_1_t10080	estExt_Genewise1Plus.C_1_t10080	estExt_Genewise1Plus.C_1_t10080	scaffold_1:111507-114566	84.6194	31.2255	-1.43826	0.000122281	yes	93737	IPR010255:Haem peroxidase;;IPR002016:Haem peroxidase, plant/fungal/bacterial;;IPR002889:Carbohydrate-binding WSC;;IPR013994:Carbohydrate-binding WSC, subgroup	sp|P84675|PFM_CHAGB Putative fungistatic metabolite OS=Chaetomium globosum GN=CHGG_05463 PE=1 SV=2:117.472;;sp|P84675|PFM_CHAGB Putative fungistatic metabolite OS=Chaetomium globosum GN=CHGG_05463 PE=1 SV=2:133.65	-	KOG4157:beta-1,6-N-acetylglucosaminyltransferase, contains WSC domain	response to oxidative stress:GO:0006979;;electron transport:GO:0006118;;peroxidase activity:GO:0004601;;heme binding:GO:0020037	32.10.07 degradation / modification of foreign (exogenous) polysaccharides N.crassa
e_gw1.7.663.1	e_gw1.7.663.1	e_gw1.7.663.1	scaffold_7:168178-170223	86.5449	31.8543	-1.44196	0.000163025	yes	78608	-	-	-	KOG3756:Pinin (desmosome-associated protein)	-
e_gw1.1.849.1	e_gw1.1.849.1	e_gw1.1.849.1	scaffold_1:722652-723369	160.634	59.0589	-1.44355	0.000674021	yes	70029	-	-	-	KOG1911:Heterochromatin-associated protein HP1 and related CHROMO domain proteins	-
fgenesh1_pg.6_#_205	fgenesh1_pg.6_#_205	fgenesh1_pg.6_#_205	scaffold_6:685350-686442	28.1229	10.3185	-1.44651	0.00837527	yes
fgenesh1_pm.9_#_263	fgenesh1_pm.9_#_263	fgenesh1_pm.9_#_263	scaffold_9:918089-918914	70.1147	25.6653	-1.4499	0.00282986	yes	130317	-	sp|P36057|SRPB_YEAST Signal recognition particle receptor subunit beta OS=Saccharomyces cerevisiae (strain ATCC 204508 / S288c) GN=SRP102 PE=1 SV=1:70.4774	-	KOG0090:Signal recognition particle receptor, beta subunit (small G protein superfamily)	-
fgenesh2_kg.22_#_45_#_gi|38140769|gb|CF886087.1|CF886087	fgenesh2_kg.22_#_45_#_gi|38140769|gb|CF886087.1|CF886087	fgenesh2_kg.22_#_45_#_gi|38140769|gb|CF886087.1|CF886087	scaffold_22:290396-290803	166.854	61.0273	-1.45106	0.00688631	yes
fgenesh1_pg.1_#_247	fgenesh1_pg.1_#_247	fgenesh1_pg.1_#_247	scaffold_1:959927-960848	53.761	19.5768	-1.45741	0.00339831	yes
estExt_Genewise1Plus.C_2_t10302	estExt_Genewise1Plus.C_2_t10302	estExt_Genewise1Plus.C_2_t10302	scaffold_2:317664-319961	73.5229	26.7236	-1.46008	0.000101287	yes	95233	IPR002931:Transglutaminase-like	sp|Q8C8H8|KY_MOUSE Kyphoscoliosis peptidase OS=Mus musculus GN=Ky PE=1 SV=1:85.5001	-	KOG3671:Actin regulatory protein (Wiskott-Aldrich syndrome protein)	-
estExt_Genewise1.C_8_t10121	estExt_Genewise1.C_8_t10121	estExt_Genewise1.C_8_t10121	scaffold_8:142996-145270	35.8554	12.9968	-1.46403	0.000964076	yes
estExt_Genewise1Plus.C_290225	estExt_Genewise1Plus.C_290225	estExt_Genewise1Plus.C_290225	scaffold_29:322940-325944	24.9304	8.99608	-1.47053	0.00117626	yes	104171	IPR006597:Sel1-like	sp|Q09897|CHR3_SCHPO Chitin synthase regulatory factor 3 OS=Schizosaccharomyces pombe (strain ATCC 38366 / 972) GN=chr3 PE=1 SV=1:256.144	-	KOG1550:Extracellular protein SEL-1 and related proteins	-	01.05.25 regulation of C-compound and carbohydrate metabolism N.crassa	42.01 cell wall	18.02.01 enzymatic activity regulation / enzyme regulator N.crassa
estExt_fgenesh2_kg.C_40003	estExt_fgenesh2_kg.C_40003	estExt_fgenesh2_kg.C_40003	scaffold_4:82602-83833	64.8356	23.3202	-1.4752	0.000843783	yes	122472	IPR001279:Beta-lactamase-like	sp|Q54EJ5|GLOB2_DICDI Glyoxylase B2 OS=Dictyostelium discoideum GN=gloB2 PE=3 SV=1:247.669	3.1.2.6:Hydroxyacylglutathione hydrolase.	KOG0814:Glyoxylase	hydrolase activity:GO:0016787;;hydroxyacylglutathione hydrolase activity:GO:0004416
estExt_Genemark1.C_260082	estExt_Genemark1.C_260082	estExt_Genemark1.C_260082	scaffold_26:278470-280141	26.7621	9.61527	-1.47679	0.00308859	yes	26513	IPR011059:Metal-dependent hydrolase, composite;;IPR013108:Amidohydrolase 3	sp|O34355|YTCJ_BACSU Putative amidohydrolase ytcJ OS=Bacillus subtilis GN=ytcJ PE=4 SV=1:137.887	-	-	hydrolase activity, acting on carbon-nitrogen (but not peptide) bonds:GO:0016810
e_gw1.49.36.1	e_gw1.49.36.1	e_gw1.49.36.1	scaffold_49:53989-56077	12.2307	4.3881	-1.47883	0.00760729	yes	93292	-	-	-	KOG2146:Splicing coactivator SRm160/300, subunit SRm160 (contains PWI domain)	-
gw1.9.400.1	gw1.9.400.1	gw1.9.400.1	scaffold_9:180448-181394	59.5502	21.3315	-1.48112	0.00372401	yes	51316	-	-	-	KOG4462:WASP-interacting protein VRP1/WIP, contains WH2 domain	-
e_gw1.29.209.1	e_gw1.29.209.1	e_gw1.29.209.1	scaffold_29:246016-250027	57.4847	20.5406	-1.4847	9.52969e-05	yes	90456	IPR005821:Ion transport	sp|Q12324|YVC1_YEAST Calcium channel YVC1 OS=Saccharomyces cerevisiae (strain ATCC 204508 / S288c) GN=YVC1 PE=1 SV=2:81.2629	-	KOG3609:Receptor-activated Ca2+-permeable cation channels (STRPC family)	ion transport:GO:0006811;;ion channel activity:GO:0005216;;membrane:GO:0016020
estExt_Genemark1.C_100218	estExt_Genemark1.C_100218	estExt_Genemark1.C_100218	scaffold_10:811961-813750	42.7145	15.2486	-1.48605	0.000787637	yes	25194	IPR013078:Phosphoglycerate mutase	sp|Q99288|DET1_YEAST Putative phosphoglycerate mutase DET1 OS=Saccharomyces cerevisiae (strain ATCC 204508 / S288c) GN=DET1 PE=1 SV=1:171.014	2.7.7.7:DNA-directed DNA polymerase.	KOG2992:Nucleolar GTPase/ATPase p130	DNA-directed DNA polymerase activity:GO:0003887;;DNA polymerase activity:GO:0034061
estExt_Genewise1Plus.C_13_t10377	estExt_Genewise1Plus.C_13_t10377	estExt_Genewise1Plus.C_13_t10377	scaffold_13:491212-493427	209.563	74.5315	-1.49146	0.000152866	yes	100822	IPR008930:Terpenoid cylases/protein prenyltransferase alpha-alpha toroid;;IPR001330:Prenyltransferase/squalene oxidase	sp|Q8K2I1|FNTB_MOUSE Protein farnesyltransferase subunit beta OS=Mus musculus GN=Fntb PE=2 SV=1:262.692	-	KOG0365:Beta subunit of farnesyltransferase	catalytic activity:GO:0003824;;protein farnesyltransferase activity:GO:0004660	01.06 lipid, fatty acid and isoprenoid metabolism N.crassa	01.06.06 isoprenoid metabolism	14.07.01 modification with fatty acids (e.g. myristylation, palmitylation, farnesylation)	30.01 cellular signalling	16.17 metal binding	16.17.09 heavy metal binding (Cu, Fe, Zn)
estExt_Genewise1.C_2_t10196	estExt_Genewise1.C_2_t10196	estExt_Genewise1.C_2_t10196	scaffold_2:183775-185855	150.075	53.2885	-1.49379	8.14287e-05	yes	106794	-	sp|Q06479|YL352_YEAST F-box protein YLR352W OS=Saccharomyces cerevisiae (strain ATCC 204508 / S288c) GN=YLR352W PE=1 SV=1:127.487	-	-	-
e_gw1.12.377.1	e_gw1.12.377.1	e_gw1.12.377.1	scaffold_12:699422-701991	202.761	71.8307	-1.49711	0.000312657	yes	82375	IPR001841:Zinc finger, RING-type;;IPR003137:Protease-associated PA	sp|Q66HG0|RNF13_RAT E3 ubiquitin-protein ligase RNF13 OS=Rattus norvegicus GN=Rnf13 PE=2 SV=1:68.1662	-	KOG4628:Predicted E3 ubiquitin ligase	zinc ion binding:GO:0008270;;protein binding:GO:0005515
e_gw1.1.2349.1	e_gw1.1.2349.1	e_gw1.1.2349.1	scaffold_1:164190-166273	24.8854	8.8006	-1.49963	0.00258863	yes	68277	IPR005828:General substrate transporter;;IPR007114:Major facilitator superfamily;;IPR003663:Sugar transporter;;IPR016196:MFS general substrate transporter;;IPR005829:Sugar transporter, conserved site	sp|P10870|SNF3_YEAST High-affinity glucose transporter SNF3 OS=Saccharomyces cerevisiae (strain ATCC 204508 / S288c) GN=SNF3 PE=1 SV=3:226.868	5.3.1.4:L-arabinose isomerase.	KOG0254:Predicted transporter (major facilitator superfamily)	sugar:hydrogen symporter activity:GO:0005351;;L-arabinose isomerase activity:GO:0008733;;carbohydrate transport:GO:0008643;;transporter activity:GO:0005215;;integral to membrane:GO:0016021;;transport:GO:0006810;;membrane:GO:0016020	01.05.25 regulation of C-compound and carbohydrate metabolism N.crassa	20.01.03 C-compound and carbohydrate transport	20.01.03.01 sugar transport	20.09.18 cellular import	20.09.18.07 non-vesicular cellular import	34.01.01.03 homeostasis of protons	34.11.12 perception of nutrients and nutritional adaptation N.crassa	20.03 transport facilities	20.03.02.02.01 proton driven symporter
e_gw1.9.352.1	e_gw1.9.352.1	e_gw1.9.352.1	scaffold_9:497924-498636	87.7472	30.9406	-1.50385	0.00725166	yes	79975	IPR006760:cAMP-regulated phosphoprotein/endosulphine conserved region	sp|P79058|YF9G_SCHPO Uncharacterized protein C10F6.16 OS=Schizosaccharomyces pombe (strain ATCC 38366 / 972) GN=SPAC10F6.16 PE=2 SV=4:86.6557	-	KOG4076:Regulator of ATP-sensitive K+ channels Alpha-endosulfine/ARPP-19 and related cAMP-regulated phosphoproteins	-
fgenesh1_pg.20_#_55	fgenesh1_pg.20_#_55	fgenesh1_pg.20_#_55	scaffold_20:220039-224259	50.0696	17.6159	-1.50705	4.35077e-05	yes	37922	IPR003006:Immunoglobulin/major histocompatibility complex, conserved site;;IPR006849:IKI3	sp|Q06706|ELP1_YEAST Elongator complex protein 1 OS=Saccharomyces cerevisiae (strain ATCC 204508 / S288c) GN=IKI3 PE=1 SV=1:837.795	-	KOG1920:IkappaB kinase complex, IKAP component	-	10.01.09.05 DNA conformation modification (e.g. chromatin) N.crassa	11.02.03.01.04 transcription elongation	11.02.03.04 transcriptional control	14.07.04 modification by acetylation, deacetylation N.crassa
estExt_Genemark1.C_3_t10217	estExt_Genemark1.C_3_t10217	estExt_Genemark1.C_3_t10217	scaffold_3:746243-748311	50.8538	17.8213	-1.51276	0.000210346	yes	24000	IPR006620:Prolyl 4-hydroxylase, alpha subunit;;IPR005123:2OG-Fe(II) oxygenase;;IPR000169:Peptidase, cysteine peptidase active site	sp|Q11120|OFD1_SCHPO PKHD-type hydroxylase ofd1 OS=Schizosaccharomyces pombe (strain ATCC 38366 / 972) GN=ofd1 PE=1 SV=1:405.986	-	KOG3844:Predicted component of NuA3 histone acetyltransferase complex	cysteine-type endopeptidase activity:GO:0004197;;protein metabolic process:GO:0019538;;oxidoreductase activity, acting on paired donors, with incorporation or reduction of molecular oxygen, 2-oxoglutarate as one donor, and incorporation of one atom each of oxygen into both donors:GO:0016706;;proteolysis:GO:0006508
estExt_fgenesh1_pm.C_40040	estExt_fgenesh1_pm.C_40040	estExt_fgenesh1_pm.C_40040	scaffold_4:122367-123752	1144.7	399.474	-1.5188	0.00150801	yes	136351	IPR001585:Transaldolase	sp|B2J2D9|TAL_NOSP7 Transaldolase OS=Nostoc punctiforme (strain ATCC 29133 / PCC 73102) GN=tal PE=3 SV=1:100.138	2.2.1.2:Transaldolase.	KOG2772:Transaldolase	carbohydrate metabolic process:GO:0005975;;transaldolase activity:GO:0004801
fgenesh1_pm.7_#_280	fgenesh1_pm.7_#_280	fgenesh1_pm.7_#_280	scaffold_7:956660-957425	231.178	80.6521	-1.51922	0.0028668	yes	129607	IPR006056:YjgF-like protein;;IPR006175:Endoribonuclease L-PSP;;IPR013813:Endoribonuclease L-PSP/chorismate mutase-like	sp|O58584|Y854_PYRHO RutC family protein PH0854 OS=Pyrococcus horikoshii (strain ATCC 700860 / DSM 12428 / JCM 9974 / NBRC 100139 / OT-3) GN=PH0854 PE=1 SV=2:142.895	-	KOG2317:Putative translation initiation inhibitor UK114/IBM1	-	01.01.11.02.01 biosynthesis of isoleucine	01.03.01 purin nucleotide/nucleoside/nucleobase metabolism L.innocua	11.02.03.04 transcriptional control	32.01 stress response	32.01.05 heat shock response	34.11.03.07 pheromone response, mating-type determination, sex-specific proteins N.crassa	42.16 mitochondrion
fgenesh1_pm.2_#_376	fgenesh1_pm.2_#_376	fgenesh1_pm.2_#_376	scaffold_2:1321122-1321676	76.4747	26.6624	-1.52018	0.00973518	yes	127051	IPR008012:Proteasome maturation factor UMP1	sp|P38293|UMP1_YEAST Proteasome maturation factor UMP1 OS=Saccharomyces cerevisiae (strain ATCC 204508 / S288c) GN=UMP1 PE=1 SV=1:97.0561	-	KOG3061:Proteasome maturation factor	-	14.10 assembly of protein complexes	14.13.01 cytoplasmic and nuclear protein degradation N.crassa	14.13.01.01 proteasomal degradation (ubiquitin/proteasomal pathway) S.cerevisiae	32.01.07 unfolded protein response (e.g. ER quality control) S.cerevisiae	16.01 protein binding	18.02.01.01.03 protease activator
estExt_Genewise1Plus.C_13_t10407	estExt_Genewise1Plus.C_13_t10407	estExt_Genewise1Plus.C_13_t10407	scaffold_13:545031-547841	43.4732	15.1528	-1.52054	0.000245344	yes	100837	IPR005200:Glycoside hydrolase, family 81	sp|Q09850|ENG2_SCHPO Putative endo-1,3(4)-beta-glucanase 2 OS=Schizosaccharomyces pombe (strain ATCC 38366 / 972) GN=eng2 PE=2 SV=1:521.546	-	KOG2254:Predicted endo-1,3-beta-glucanase	-	01.05 C-compound and carbohydrate metabolism	01.05.03 polysaccharide metabolism	14.10 assembly of protein complexes	40.01 cell growth / morphogenesis	42.04.03 actin cytoskeleton	43.01.03.05 budding, cell polarity and filament formation S.cerevisiae
estExt_fgenesh2_kg.C_210002	estExt_fgenesh2_kg.C_210002	estExt_fgenesh2_kg.C_210002	scaffold_21:33761-35454	129.747	45.1488	-1.52294	5.14671e-05	yes	124526	IPR015821:Glycoside hydrolase, family 18, N-terminal;;IPR017853:Glycoside hydrolase, catalytic core;;IPR001223:Glycoside hydrolase, family 18, catalytic domain;;IPR001579:Glycoside hydrolase, chitinase active site;;IPR011583:Chitinase II	sp|P48827|CHI4_TRIHA 42 kDa endochitinase OS=Trichoderma harzianum GN=chit42 PE=1 SV=1:707.597	3.2.1.14:Chitinase.	KOG2806:Chitinase	endochitinase activity:GO:0008843;;hydrolase activity, hydrolyzing O-glycosyl compounds:GO:0004553;;carbohydrate metabolic process:GO:0005975;;chitin catabolic process:GO:0006032;;chitinase activity:GO:0004568	01.05.03 polysaccharide metabolism	01.05.09.07 aminosaccharide catabolism
estExt_Genewise1Plus.C_270239	estExt_Genewise1Plus.C_270239	estExt_Genewise1Plus.C_270239	scaffold_27:265203-266165	778.181	270.73	-1.52325	0.000174185	yes
estExt_fgenesh1_pm.C_80066	estExt_fgenesh1_pm.C_80066	estExt_fgenesh1_pm.C_80066	scaffold_8:239802-241176	210.772	73.1822	-1.52612	0.000136799	yes	137130	IPR013094:Alpha/beta hydrolase fold-3	sp|Q5UQ83|YR526_MIMIV Putative alpha/beta hydrolase R526 OS=Acanthamoeba polyphaga mimivirus GN=MIMI_R526 PE=1 SV=1:87.0409	-	KOG4388:Hormone-sensitive lipase HSL	metabolic process:GO:0008152;;hydrolase activity:GO:0016787;;hormone-sensitive lipase activity:GO:0033878	01.06 lipid, fatty acid and isoprenoid metabolism N.crassa
fgenesh1_pm.4_#_405	fgenesh1_pm.4_#_405	fgenesh1_pm.4_#_405	scaffold_4:1373640-1375546	50.1682	17.4142	-1.52651	0.000415469	yes	128408	IPR009071:High mobility group box, HMG;;IPR000910:High mobility group box, HMG1/HMG2;;IPR010993:Sterile alpha motif homology;;IPR001660:Sterile alpha motif SAM	sp|Q6AZF8|HM20A_XENLA High mobility group protein 20A OS=Xenopus laevis GN=hmg20a PE=2 SV=1:80.1073	-	KOG0381:HMG box-containing protein	regulation of transcription, DNA-dependent:GO:0006355;;DNA binding:GO:0003677
estExt_Genemark1.C_260001	estExt_Genemark1.C_260001	estExt_Genemark1.C_260001	scaffold_26:2454-3583	136.436	47.252	-1.52978	8.27627e-05	yes	26479	IPR016040:NAD(P)-binding;;IPR013154:Alcohol dehydrogenase GroES-like;;IPR013149:Alcohol dehydrogenase, zinc-binding;;IPR011032:GroES-like	sp|O94564|YGD6_SCHPO Zinc-type alcohol dehydrogenase-like protein C1773.06c OS=Schizosaccharomyces pombe (strain ATCC 38366 / 972) GN=SPBC1773.06c PE=2 SV=1:289.271	1.1.1.1:Alcohol dehydrogenase.	KOG1198:Zinc-binding oxidoreductase	metabolic process:GO:0008152;;alcohol dehydrogenase activity, iron-dependent:GO:0004025;;alcohol dehydrogenase activity, metal ion-independent:GO:0004023;;catalytic activity:GO:0003824;;alcohol dehydrogenase activity, zinc-dependent:GO:0004024;;binding:GO:0005488;;alcohol dehydrogenase activity:GO:0004022
estExt_Genewise1Plus.C_260081	estExt_Genewise1Plus.C_260081	estExt_Genewise1Plus.C_260081	scaffold_26:98328-100956	199.156	68.9327	-1.53064	0.000136805	yes	103596	IPR008928:Six-hairpin glycosidase-like;;IPR014870:Region of unknown function DUF1793	-	-	-	catalytic activity:GO:0003824	01.01.03.01.01 biosynthesis of glutamine	01.01.03.01.02 degradation of glutamine	01.01.03.02.01 biosynthesis of glutamate	01.01.03.02.02 degradation of glutamate
fgenesh1_pg.6_#_51	fgenesh1_pg.6_#_51	fgenesh1_pg.6_#_51	scaffold_6:158279-161102	24.2618	8.39667	-1.5308	0.000672716	yes	34476	IPR007219:Fungal specific transcription factor;;IPR001138:Fungal transcriptional regulatory protein, N-terminal	sp|Q9P6I9|YHDD_SCHPO Uncharacterized transcriptional regulatory protein C1683.13c OS=Schizosaccharomyces pombe (strain ATCC 38366 / 972) GN=SPBC1683.13c PE=1 SV=1:62.3882	-	-	regulation of transcription, DNA-dependent:GO:0006355;;nucleus:GO:0005634;;zinc ion binding:GO:0008270;;transcription:GO:0006350;;DNA binding:GO:0003677;;transcription factor activity:GO:0003700
estExt_fgenesh1_pg.C_100198	estExt_fgenesh1_pg.C_100198	estExt_fgenesh1_pg.C_100198	scaffold_10:820024-821509	20.1644	6.94927	-1.53688	0.00500421	yes	141598	IPR014756:Immunoglobulin E-set	sp|Q10347|YDA5_SCHPO Uncharacterized protein C1F12.05 OS=Schizosaccharomyces pombe (strain ATCC 38366 / 972) GN=SPAC1F12.05 PE=2 SV=1:175.637	-	-	-
e_gw1.21.326.1	e_gw1.21.326.1	e_gw1.21.326.1	scaffold_21:231184-233436	54.8028	18.8312	-1.54113	0.000188435	yes	87717	IPR000101:Gamma-glutamyltranspeptidase	sp|P19440|GGT1_HUMAN Gamma-glutamyltranspeptidase 1 OS=Homo sapiens GN=GGT1 PE=1 SV=2:357.451	2.3.2.2:Gamma-glutamyltransferase.	KOG2410:Gamma-glutamyltransferase	gamma-glutamyltransferase activity:GO:0003840	01.01 amino acid metabolism	01.01.09 metabolism of the cysteine - aromatic group H.pylori	01.01.13 regulation of amino acid metabolism	01.05 C-compound and carbohydrate metabolism	01.06 lipid, fatty acid and isoprenoid metabolism	01.07 metabolism of vitamins, cofactors, and prosthetic groups	01.07.01 biosynthesis of vitamins, cofactors, and prosthetic groups	01.07.03 catabolism of vitamins, cofactors, and prosthetic groups S.cerevisiae	01.20.05.09 metabolism of eicosanoids	01.20.37 metabolism of peptide derived compounds N.crassa	01.20.37.01 metabolism of thioredoxin, glutaredoxin, glutathion	10.03.01 mitotic cell cycle and cell cycle control S.cerevisiae	14.07.09 posttranslational modification of amino acids (e.g. hydroxylation, methylation) S.cerevisiae	32.05.05 virulence, disease factors	42.01 cell wall
fgenesh1_pm.35_#_43	fgenesh1_pm.35_#_43	fgenesh1_pm.35_#_43	scaffold_35:142762-144548	14.9636	5.13107	-1.54413	0.00695013	yes	134605	-	-	-	KOG1869:Splicing coactivator SRm160/300, subunit SRm300	-
estExt_fgenesh1_pg.C_130098	estExt_fgenesh1_pg.C_130098	estExt_fgenesh1_pg.C_130098	scaffold_13:375667-377830	197.778	67.6649	-1.5474	6.44978e-05	yes	141910	IPR001849:Pleckstrin-like	-	-	KOG1181:FOG: Low-complexity	-
e_gw1.13.222.1	e_gw1.13.222.1	e_gw1.13.222.1	scaffold_13:649362-650718	45.4693	15.5217	-1.55061	0.00112729	yes	83240	IPR007087:Zinc finger, C2H2-type;;IPR015880:Zinc finger, C2H2-like	sp|Q91VW9|ZKSC3_MOUSE Zinc finger protein with KRAB and SCAN domains 3 OS=Mus musculus GN=Zkscan3 PE=2 SV=1:72.7886;;sp|Q91VW9|ZKSC3_MOUSE Zinc finger protein with KRAB and SCAN domains 3 OS=Mus musculus GN=Zkscan3 PE=2 SV=1:87.8113;;sp|Q91VW9|ZKSC3_MOUSE Zinc finger protein with KRAB and SCAN domains 3 OS=Mus musculus GN=Zkscan3 PE=2 SV=1:111.309;;sp|Q91VW9|ZKSC3_MOUSE Zinc finger protein with K…	-	KOG1721:FOG: Zn-finger	nucleic acid binding:GO:0003676;;zinc ion binding:GO:0008270;;intracellular:GO:0005622	11.02.03.04 transcriptional control	16.03.01 DNA binding
gm1.7036_g	gm1.7036_g	gm1.7036_g	scaffold_22:56811-58721	217.548	74.1176	-1.55344	7.41922e-05	yes	11480	IPR007266:Endoplasmic reticulum oxidoreductin 1;;IPR000629:RNA helicase, ATP-dependent, DEAD-box, conserved site	sp|Q7SEY9|ERO1_NEUCR Endoplasmic oxidoreductin-1 OS=Neurospora crassa GN=ero-1 PE=3 SV=1:58.151;;sp|Q7SEY9|ERO1_NEUCR Endoplasmic oxidoreductin-1 OS=Neurospora crassa GN=ero-1 PE=3 SV=1:748.814	1.8.4.-:With a disulfide as acceptor.	KOG2608:Endoplasmic reticulum membrane-associated oxidoreductin involved in disulfide bond formation	endoplasmic reticulum membrane:GO:0005789;;FAD binding:GO:0050660;;protein binding:GO:0005515;;protein-methionine-R-oxide reductase activity:GO:0000318;;nucleic acid binding:GO:0003676;;ATP binding:GO:0005524;;protein thiol-disulfide exchange:GO:0006467;;oxidoreductase activity, acting on sulfur group of donors, disulfide as acceptor:GO:0016671;;ATP-dependent helicase activity:GO:0008026;;electro…	14.07 protein modification
e_gw1.9.728.1	e_gw1.9.728.1	e_gw1.9.728.1	scaffold_9:672360-673182	30.1396	10.2649	-1.55394	0.00752411	yes	79707	IPR004910:Yippee-like protein	sp|Q8S5M8|YIPL_ORYSJ Putative yippee-like protein Os10g0369500 OS=Oryza sativa subsp. japonica GN=Os10g0369500 PE=3 SV=1:93.5893	-	KOG3399:Predicted Yippee-type zinc-binding protein	-
estExt_fgenesh2_kg.C_250040	estExt_fgenesh2_kg.C_250040	estExt_fgenesh2_kg.C_250040	scaffold_25:235794-236300	380.966	129.475	-1.55699	8.07115e-05	yes	124867	-	-	-	KOG0382:Carbonic anhydrase	-
estExt_fgenesh1_pg.C_150021	estExt_fgenesh1_pg.C_150021	estExt_fgenesh1_pg.C_150021	scaffold_15:77765-79532	156.265	53.0016	-1.55989	2.21298e-05	yes	142087	IPR005135:Endonuclease/exonuclease/phosphatase;;IPR000300:Inositol polyphosphate related phosphatase	sp|Q12271|INP53_YEAST Inositol-1,4,5-trisphosphate 5-phosphatase 3 OS=Saccharomyces cerevisiae (strain ATCC 204508 / S288c) GN=INP53 PE=1 SV=1:87.0409	3.1.3.56:Inositol-1,4,5-trisphosphate 5-phosphatase.	KOG0566:Inositol-1,4,5-triphosphate 5-phosphatase (synaptojanin), INP51/INP52/INP53 family	inositol or phosphatidylinositol phosphatase activity:GO:0004437;;inositol-polyphosphate 5-phosphatase activity:GO:0004445
gm1.1440_g	gm1.1440_g	gm1.1440_g	scaffold_2:1518697-1520601	204.656	69.3649	-1.56092	9.39133e-05	yes	5884	-	sp|Q6BPN7|ERFD_DEBHA Ras modification protein ERF4 OS=Debaryomyces hansenii (strain ATCC 36239 / CBS 767 / JCM 1990 / NBRC 0083 / IGC 2968) GN=ERF4 PE=3 SV=2:65.4698	-	-	-
e_gw1.68.2.1	e_gw1.68.2.1	e_gw1.68.2.1	scaffold_68:160-1846	37.1344	12.4546	-1.57607	0.000531184	yes
e_gw1.7.1203.1	e_gw1.7.1203.1	e_gw1.7.1203.1	scaffold_7:673703-674978	21.0478	7.02571	-1.58295	0.00385136	yes	77754	IPR003734:Protein of unknown function DUF155	sp|Q9NWS8|RMND1_HUMAN Required for meiotic nuclear division protein 1 homolog OS=Homo sapiens GN=RMND1 PE=1 SV=2:141.354	-	KOG2861:Uncharacterized conserved protein	-
estExt_Genewise1Plus.C_1_t20271	estExt_Genewise1Plus.C_1_t20271	estExt_Genewise1Plus.C_1_t20271	scaffold_1:977340-978712	22.7524	7.59448	-1.583	0.00966581	yes	94061	IPR017853:Glycoside hydrolase, catalytic core;;IPR001223:Glycoside hydrolase, family 18, catalytic domain;;IPR001579:Glycoside hydrolase, chitinase active site	sp|P29025|CHI1_RHINI Chitinase 1 OS=Rhizopus niveus GN=CHI1 PE=3 SV=1:206.453	3.2.1.14:Chitinase.	KOG4701:Chitinase	endochitinase activity:GO:0008843;;hydrolase activity, hydrolyzing O-glycosyl compounds:GO:0004553;;carbohydrate metabolic process:GO:0005975;;chitinase activity:GO:0004568	01.05.03 polysaccharide metabolism
fgenesh1_pm.15_#_162	fgenesh1_pm.15_#_162	fgenesh1_pm.15_#_162	scaffold_15:595743-597134	64.0283	21.3426	-1.58498	0.000189937	yes	131841	-	sp|P53898|NSG2_YEAST Protein NSG2 OS=Saccharomyces cerevisiae (strain ATCC 204508 / S288c) GN=NSG2 PE=1 SV=1:55.4546	-	KOG4363:Putative growth response protein	-
gm1.3438_g	gm1.3438_g	gm1.3438_g	scaffold_6:1294845-1296273	180.223	60.0682	-1.58511	5.19413e-05	yes	7882	IPR016084:Haem oxygenase-like, multi-helical	-	-	-	-
estExt_Genewise1.C_7_t10106	estExt_Genewise1.C_7_t10106	estExt_Genewise1.C_7_t10106	scaffold_7:115889-120654	160.754	53.4323	-1.58907	0.000254576	yes	109810	IPR003593:AAA+ ATPase, core;;IPR010929:CDR ABC transporter;;IPR013525:ABC-2 type transporter;;IPR003439:ABC transporter-like	sp|O74676|CDR4_CANAL ABC transporter CDR4 OS=Candida albicans GN=CDR4 PE=3 SV=1:1495.72	-	KOG0065:Pleiotropic drug resistance proteins (PDR1-15), ABC superfamily	nucleoside-triphosphatase activity:GO:0017111;;ATP binding:GO:0005524;;integral to membrane:GO:0016021;;transport:GO:0006810;;ATPase activity:GO:0016887;;ATPase activity, coupled to transmembrane movement of substances:GO:0042626;;nucleotide binding:GO:0000166	01.04 phosphate metabolism	01.05 C-compound and carbohydrate metabolism	20.01.01.01 cation transport (H+, Na+, K+, Ca2+ , NH4+, etc.) S.cerevisiae	20.01.03 C-compound and carbohydrate transport	20.01.13 lipid/fatty acid transport	20.01.27 drug/toxin transport	20.09.16.01 Type I protein secretion system (ABC-type transport systems) N.crassa	32.01.01 oxidative stress response	32.05.01.03 chemical agent resistance	32.07 detoxification	32.07.05 detoxification by export	34.01.01.01 homeostasis of metal ions (Na, K, Ca etc.) S.cerevisiae	16.19.03 ATP binding	20.03.22 transport ATPases	20.03.25 ABC transporters
gm1.6758_g	gm1.6758_g	gm1.6758_g	scaffold_20:241711-243244	17.119	5.68631	-1.59003	0.00490099	yes	11202	IPR010978:tRNA-binding arm;;IPR002314:Aminoacyl-tRNA synthetase, class II (G, H, P and S);;IPR015866:Seryl-tRNA synthetase, class IIa, N-terminal;;IPR006195:Aminoacyl-tRNA synthetase, class II;;IPR002317:Seryl-tRNA synthetase, class IIa	sp|P38705|SYSM_YEAST Seryl-tRNA synthetase, mitochondrial OS=Saccharomyces cerevisiae (strain ATCC 204508 / S288c) GN=DIA4 PE=1 SV=1:293.508	6.1.1.11:Serine--tRNA ligase.	KOG2509:Seryl-tRNA synthetase	cytoplasm:GO:0005737;;seryl-tRNA aminoacylation:GO:0006434;;tRNA aminoacylation for protein translation:GO:0006418;;translation:GO:0006412;;aminoacyl-tRNA ligase activity:GO:0004812;;serine-tRNA ligase activity:GO:0004828;;nucleotide binding:GO:0000166;;ATP binding:GO:0005524	02.13.03 aerobic respiration	12.10 aminoacyl-tRNA-synthetases	43.01.03.05 budding, cell polarity and filament formation S.cerevisiae
fgenesh1_pg.6_#_144	fgenesh1_pg.6_#_144	fgenesh1_pg.6_#_144	scaffold_6:469810-470245	2878.3	950.832	-1.59795	2.68913e-05	yes	34569	IPR010636:Hydrophobin 2	sp|Q9UVI4|THYD_CLAFS Trihydrophobin OS=Claviceps fusiformis GN=TH1 PE=1 SV=1:57.3806;;sp|Q9UVI4|THYD_CLAFS Trihydrophobin OS=Claviceps fusiformis GN=TH1 PE=1 SV=1:53.1434	-	-	cell communication:GO:0007154;;cell wall:GO:0005618;;extracellular region:GO:0005576
estExt_fgenesh2_kg.C_30017	estExt_fgenesh2_kg.C_30017	estExt_fgenesh2_kg.C_30017	scaffold_3:68192-70550	95.5109	31.5182	-1.59948	3.00731e-05	yes	122299	IPR001382:Glycoside hydrolase, family 47	sp|Q12563|MNS1B_ASPSA Mannosyl-oligosaccharide alpha-1,2-mannosidase 1B OS=Aspergillus saitoi GN=mns1B PE=2 SV=1:527.709	3.2.1.113:Mannosyl-oligosaccharide 1,2-alpha-mannosidase.	KOG2431:1, 2-alpha-mannosidase	calcium ion binding:GO:0005509;;membrane:GO:0016020;;mannosyl-oligosaccharide 1,2-alpha-mannosidase activity:GO:0004571	01.05 C-compound and carbohydrate metabolism	14.07.02 modification with sugar residues (e.g. glycosylation, deglycosylation) N.crassa	14.07.02.02 N-directed glycosylation, deglycosylation S.cerevisiae
e_gw1.25.245.1	e_gw1.25.245.1	e_gw1.25.245.1	scaffold_25:292704-294235	386.374	127.088	-1.60418	3.42994e-05	yes	89200	IPR006076:FAD dependent oxidoreductase	sp|O43029|FAP1_SCHPO L-pipecolate oxidase OS=Schizosaccharomyces pombe (strain ATCC 38366 / 972) GN=fap1 PE=1 SV=1:164.466	1.5.3.1:Sarcosine oxidase.	KOG2820:FAD-dependent oxidoreductase	oxidoreductase activity:GO:0016491;;sarcosine oxidase activity:GO:0008115
estExt_fgenesh1_pg.C_170090	estExt_fgenesh1_pg.C_170090	estExt_fgenesh1_pg.C_170090	scaffold_17:362689-363901	130.568	42.8737	-1.60663	2.99775e-05	yes	142298	IPR017853:Glycoside hydrolase, catalytic core	sp|P29026|CHI1_RHIOL Chitinase 1 OS=Rhizopus oligosporus GN=CHI1 PE=1 SV=1:52.373	-	-	-	01.05 C-compound and carbohydrate metabolism	42.01 cell wall
fgenesh1_pg.11_#_218	fgenesh1_pg.11_#_218	fgenesh1_pg.11_#_218	scaffold_11:828234-830009	16.3577	5.36376	-1.60865	0.00268177	yes	36248	IPR005289:GTP-binding;;IPR014813:GNL3L/Grn1 putative GTPase;;IPR006073:GTP1/OBG;;IPR002917:GTP-binding protein, HSR1-related	sp|P40010|NUG1_YEAST Nuclear GTP-binding protein NUG1 OS=Saccharomyces cerevisiae (strain ATCC 204508 / S288c) GN=NUG1 PE=1 SV=1:447.973	-	KOG2484:GTPase	GTP binding:GO:0005525;;intracellular:GO:0005622	11.04.01 rRNA processing	12.01 ribosome biogenesis	20.09.01 nuclear transport	16.19.05 GTP binding	20.03 transport facilities
fgenesh2_kg.29_#_74_#_gi|30113827|gb|CB899169.1|CB899169	fgenesh2_kg.29_#_74_#_gi|30113827|gb|CB899169.1|CB899169	fgenesh2_kg.29_#_74_#_gi|30113827|gb|CB899169.1|CB899169	scaffold_29:318087-321159	115.667	37.6438	-1.6195	0.000674021	yes
e_gw1.17.226.1	e_gw1.17.226.1	e_gw1.17.226.1	scaffold_17:460453-462286	13.489	4.37854	-1.62326	0.00367236	yes	85254	IPR005828:General substrate transporter;;IPR007114:Major facilitator superfamily;;IPR003663:Sugar transporter;;IPR016196:MFS general substrate transporter;;IPR005829:Sugar transporter, conserved site	sp|Q4U3U4|QAY_NEUTR Quinate permease OS=Neurospora terricola GN=qa-y PE=3 SV=1:232.646	5.3.1.4:L-arabinose isomerase.	KOG0254:Predicted transporter (major facilitator superfamily)	sugar:hydrogen symporter activity:GO:0005351;;L-arabinose isomerase activity:GO:0008733;;carbohydrate transport:GO:0008643;;transporter activity:GO:0005215;;integral to membrane:GO:0016021;;transport:GO:0006810;;membrane:GO:0016020	20.01.03 C-compound and carbohydrate transport	20.09.18.07 non-vesicular cellular import
estExt_fgenesh1_pm.C_280120	estExt_fgenesh1_pm.C_280120	estExt_fgenesh1_pm.C_280120	scaffold_28:375097-378780	67.7359	21.9541	-1.62543	9.73811e-06	yes	139111	IPR001412:Aminoacyl-tRNA synthetase, class I, conserved site;;IPR002302:Leucyl-tRNA synthetase, class Ia, bacterial/mitochondrial;;IPR013155:Valyl/Leucyl/Isoleucyl-tRNA synthetase, class I, anticodon-binding;;IPR009008:Valyl/Leucyl/Isoleucyl-tRNA synthetase, class Ia, editing;;IPR015413:Aminoacyl-tRNA synthetase, class I (M);;IPR009080:Aminoacyl-tRNA synthetase, class 1a, anticodon-binding	sp|P15181|SYLM_NEUCR Leucyl-tRNA synthetase, mitochondrial OS=Neurospora crassa GN=leu-5 PE=3 SV=1:1201.42	6.1.1.4:Leucine--tRNA ligase.	KOG0435:Leucyl-tRNA synthetase	cytoplasm:GO:0005737;;tRNA aminoacylation for protein translation:GO:0006418;;translation:GO:0006412;;aminoacyl-tRNA ligase activity:GO:0004812;;leucyl-tRNA aminoacylation:GO:0006429;;nucleotide binding:GO:0000166;;ATP binding:GO:0005524;;leucine-tRNA ligase activity:GO:0004823	11.02.03 mRNA synthesis	11.04.03.01 splicing	12.10 aminoacyl-tRNA-synthetases	16.03.03 RNA binding	16.19.03 ATP binding
estExt_Genewise1.C_470014	estExt_Genewise1.C_470014	estExt_Genewise1.C_470014	scaffold_47:19382-22068	359.943	115.477	-1.64016	0.00019511	yes	116820	IPR016035:Acyl transferase/acyl hydrolase/lysophospholipase;;IPR002642:Lysophospholipase, catalytic region	sp|P0C957|PLB1_ASPFU Lysophospholipase 1 OS=Neosartorya fumigata (strain ATCC MYA-4609 / Af293 / CBS 101355 / FGSC A1100) GN=plb1 PE=2 SV=1:660.218	3.1.1.5:Lysophospholipase.	KOG1325:Lysophospholipase	metabolic process:GO:0008152;;phospholipase activity:GO:0004620;;lysophospholipase activity:GO:0004622;;phospholipid catabolic process:GO:0009395	01.06 lipid, fatty acid and isoprenoid metabolism N.crassa	01.06.02.01 phospholipid metabolism
e_gw1.5.1072.1	e_gw1.5.1072.1	e_gw1.5.1072.1	scaffold_5:500237-500702	234.157	75.0601	-1.64136	0.000369141	yes
estExt_fgenesh2_kg.C_20384	estExt_fgenesh2_kg.C_20384	estExt_fgenesh2_kg.C_20384	scaffold_2:2325936-2326768	186.76	59.8011	-1.64294	9.84858e-05	yes	122251	IPR002068:Heat shock protein Hsp20;;IPR008978:HSP20-like chaperone	sp|P19752|HSP30_NEUCR 30 kDa heat shock protein OS=Neurospora crassa GN=hsp30 PE=3 SV=1:177.948	-	KOG0710:Molecular chaperone (small heat-shock protein Hsp26/Hsp42)	-	32.01 stress response	32.01.01 oxidative stress response	32.01.05 heat shock response
gm1.2280_g	gm1.2280_g	gm1.2280_g	scaffold_4:80794-81712	27.5752	8.69917	-1.66442	0.0073172	yes	6724	IPR013217:Methyltransferase type 12	sp|O94628|YGE9_SCHPO Uncharacterized methyltransferase C1347.09 OS=Schizosaccharomyces pombe (strain ATCC 38366 / 972) GN=SPBC1347.09 PE=2 SV=1:71.2478	-	KOG1270:Methyltransferases	-
estExt_fgenesh1_pm.C_2_t10242	estExt_fgenesh1_pm.C_2_t10242	estExt_fgenesh1_pm.C_2_t10242	scaffold_2:820368-822817	292.408	92.1734	-1.66556	8.27627e-05	yes	135838	IPR007114:Major facilitator superfamily;;IPR011701:Major facilitator superfamily MFS-1;;IPR016196:MFS general substrate transporter;;IPR001958:Tetracycline resistance protein, TetA	sp|P25351|YCR3_YEAST Uncharacterized membrane protein YCR023C OS=Saccharomyces cerevisiae (strain ATCC 204508 / S288c) GN=YCR023C PE=1 SV=2:237.654	-	KOG2615:Permease of the major facilitator superfamily	tetracycline:hydrogen antiporter activity:GO:0015520;;transporter activity:GO:0005215;;integral to membrane:GO:0016021;;transport:GO:0006810;;response to antibiotic:GO:0046677;;tetracycline transport:GO:0015904	32.07 detoxification	20.03 transport facilities
e_gw1.32.67.1	e_gw1.32.67.1	e_gw1.32.67.1	scaffold_32:15394-18493	56.8283	17.8903	-1.66744	0.000149504	yes	91336	IPR003010:Nitrilase/cyanide hydratase and apolipoprotein N-acyltransferase	sp|P46011|NRL4_ARATH Bifunctional nitrilase/nitrile hydratase NIT4 OS=Arabidopsis thaliana GN=NIT4 PE=1 SV=1:171.014;;sp|P46011|NRL4_ARATH Bifunctional nitrilase/nitrile hydratase NIT4 OS=Arabidopsis thaliana GN=NIT4 PE=1 SV=1:60.4622	3.5.5.1:Nitrilase.	KOG0805:Carbon-nitrogen hydrolase	nitrilase activity:GO:0000257;;hydrolase activity, acting on carbon-nitrogen (but not peptide) bonds:GO:0016810;;nitrogen compound metabolic process:GO:0006807
estExt_fgenesh1_pm.C_120174	estExt_fgenesh1_pm.C_120174	estExt_fgenesh1_pm.C_120174	scaffold_12:705587-710575	143.668	45.175	-1.66915	2.13239e-05	yes
estExt_Genemark1.C_120150	estExt_Genemark1.C_120150	estExt_Genemark1.C_120150	scaffold_12:619474-621479	32.4946	10.207	-1.67064	0.000167374	yes	25432	IPR016161:Aldehyde/histidinol dehydrogenase;;IPR016160:Aldehyde dehydrogenase, conserved site;;IPR015590:Aldehyde dehydrogenase	sp|Q9P7K9|YOSF_SCHPO Putative aldehyde dehydrogenase-like protein C21C3 OS=Schizosaccharomyces pombe (strain ATCC 38366 / 972) GN=SPBC21C3.15c PE=2 SV=1:575.859	-	KOG2454:Betaine aldehyde dehydrogenase	metabolic process:GO:0008152;;oxidoreductase activity:GO:0016491	01.01 amino acid metabolism	01.05 C-compound and carbohydrate metabolism	02.16 fermentation	10.01.05.03.01 meiotic recombination
estExt_Genewise1Plus.C_16_t10182	estExt_Genewise1Plus.C_16_t10182	estExt_Genewise1Plus.C_16_t10182	scaffold_16:223789-225802	70.9101	22.2382	-1.67295	1.16195e-05	yes	101618	IPR016161:Aldehyde/histidinol dehydrogenase;;IPR012394:Aldehyde dehydrogenase NAD(P)-dependent;;IPR015590:Aldehyde dehydrogenase	sp|Q5RF60|AL3A2_PONAB Fatty aldehyde dehydrogenase OS=Pongo abelii GN=ALDH3A2 PE=2 SV=1:331.257	1.2.1.5:Aldehyde dehydrogenase (NAD(P)+).	KOG2456:Aldehyde dehydrogenase	metabolic process:GO:0008152;;aldehyde metabolic process:GO:0006081;;oxidoreductase activity:GO:0016491;;aldehyde dehydrogenase [NAD(P)+] activity:GO:0004030	01.05 C-compound and carbohydrate metabolism	01.05.02.07 sugar, glucoside, polyol and carboxylate catabolism B.subtilis	01.06 lipid, fatty acid and isoprenoid metabolism	01.06.06 isoprenoid metabolism	01.07 metabolism of vitamins, cofactors, and prosthetic groups	02.01 glycolysis and gluconeogenesis	20.01.15 electron transport	32.01.13 electromagnetic waves stress response (e.g. UV, X-ray)	32.07 detoxification	32.07.09 detoxification by degradation	16.21.07 NAD/NADP binding
gm1.7373_g	gm1.7373_g	gm1.7373_g	scaffold_24:296348-298208	15.7858	4.88385	-1.69253	0.002738	yes	11817	IPR006094:FAD linked oxidase, N-terminal;;IPR016166:FAD-binding, type 2;;IPR012951:Berberine/berberine-like	sp|P08159|HDNO_ARTOX 6-hydroxy-D-nicotine oxidase OS=Arthrobacter oxidans PE=1 SV=2:63.929	-	-	FAD binding:GO:0050660;;catalytic activity:GO:0003824;;oxidoreductase activity:GO:0016491	01.05 C-compound and carbohydrate metabolism
estExt_Genewise1Plus.C_7_t30049	estExt_Genewise1Plus.C_7_t30049	estExt_Genewise1Plus.C_7_t30049	scaffold_7:1292596-1293666	132.292	40.8083	-1.69679	2.48555e-05	yes	98605	IPR006863:Erv1/Alr	sp|P55789|ALR_HUMAN FAD-linked sulfhydryl oxidase ALR OS=Homo sapiens GN=GFER PE=1 SV=2:175.637	-	KOG3355:Mitochondrial sulfhydryl oxidase involved in the biogenesis of cytosolic Fe/S proteins	-	01.02 nitrogen, sulfur and selenium metabolism S.cerevisiae	10.03.01 mitotic cell cycle and cell cycle control N.crassa	34.01.01.01 homeostasis of metal ions (Na, K, Ca etc.) S.cerevisiae	40.02.03.05 growth factors	42.16 mitochondrion
gm1.7577_g	gm1.7577_g	gm1.7577_g	scaffold_26:191457-191922	97.4272	29.9878	-1.69995	0.001964	yes
fgenesh1_pg.12_#_70	fgenesh1_pg.12_#_70	fgenesh1_pg.12_#_70	scaffold_12:318533-320605	36.9176	11.3444	-1.70233	0.000129593	yes	36354	IPR012734:Dihydroxyacetone kinase;;IPR004007:Dak phosphatase;;IPR004006:Dak kinase	sp|O13902|DAK1_SCHPO Dihydroxyacetone kinase 1 OS=Schizosaccharomyces pombe (strain ATCC 38366 / 972) GN=dak1 PE=2 SV=1:525.783	2.7.1.29:Glycerone kinase.	KOG2426:Dihydroxyacetone kinase/glycerone kinase	ATP binding:GO:0005524;;glycerol metabolic process:GO:0006071;;glycerone kinase activity:GO:0004371	01.04 phosphate metabolism	01.05 C-compound and carbohydrate metabolism	01.05.07 C-3 compound metabolism	01.06 lipid, fatty acid and isoprenoid metabolism S.cerevisiae	32.01 stress response	16.19 nucleotide/nucleoside/nucleobase binding	16.19.03 ATP binding
fgenesh1_pg.6_#_275	fgenesh1_pg.6_#_275	fgenesh1_pg.6_#_275	scaffold_6:950937-953679	19.1055	5.86505	-1.70377	0.000195109	yes	34700	-	-	3.2.1.3:Glucan 1,4-alpha-glucosidase.	KOG1869:Splicing coactivator SRm160/300, subunit SRm300	glucan 1,4-alpha-glucosidase activity:GO:0004339
fgenesh1_pm.27_#_23	fgenesh1_pm.27_#_23	fgenesh1_pm.27_#_23	scaffold_27:78120-79630	14.9562	4.58572	-1.70552	0.00287179	yes	133819	IPR000120:Amidase signature enzyme	sp|C4ZHB9|GATA_EUBR3 Glutamyl-tRNA(Gln) amidotransferase subunit A OS=Eubacterium rectale (strain ATCC 33656 / VPI 0990) GN=gatA PE=3 SV=1:159.458	6.3.5.-:Carbon--nitrogen ligases with glutamine as amido-N-donor.	KOG1211:Amidases	glutaminyl-tRNA synthase (glutamine-hydrolyzing) activity:GO:0050567;;cobyrinate a,c-diamide synthase activity:GO:0043775;;carbon-nitrogen ligase activity, with glutamine as amido-N-donor:GO:0016884
gw1.26.389.1	gw1.26.389.1	gw1.26.389.1	scaffold_26:342903-343964	453.636	138.978	-1.70668	1.11286e-05	yes
gm1.4165_g	gm1.4165_g	gm1.4165_g	scaffold_8:1117475-1117819	1534.31	468.573	-1.71124	0.00119658	yes	8609	IPR004202:Cytochrome c oxidase subunit VIIc	-	-	-	electron transport:GO:0006118;;cytochrome-c oxidase activity:GO:0004129	02.11.05 accessory proteins of electron transport and membrane-associated energy conservation N.crassa	02.13 respiration
estExt_Genewise1Plus.C_13_t20069	estExt_Genewise1Plus.C_13_t20069	estExt_Genewise1Plus.C_13_t20069	scaffold_13:729623-732287	276.896	84.3906	-1.71419	3.21204e-05	yes	100921	IPR001092:Basic helix-loop-helix dimerisation region bHLH;;IPR011598:Helix-loop-helix DNA-binding	sp|Q9UUD1|SREBP_SCHPO Sterol regulatory element-binding protein 1 OS=Schizosaccharomyces pombe (strain ATCC 38366 / 972) GN=sre1 PE=1 SV=1:121.324;;sp|Q9UUD1|SREBP_SCHPO Sterol regulatory element-binding protein 1 OS=Schizosaccharomyces pombe (strain ATCC 38366 / 972) GN=sre1 PE=1 SV=1:63.5438	-	KOG2588:Predicted DNA-binding protein	nucleus:GO:0005634;;regulation of transcription:GO:0045449;;transcription regulator activity:GO:0030528	11.02.03.04 transcriptional control
estExt_fgenesh2_kg.C_410009	estExt_fgenesh2_kg.C_410009	estExt_fgenesh2_kg.C_410009	scaffold_41:41159-42459	75.1031	22.8757	-1.71506	0.00101449	yes	125426	-	sp|P22222|E13B_CELCE Glucan endo-1,3-beta-glucosidase OS=Cellulosimicrobium cellulans PE=1 SV=1:84.3445	-	-	-	01.05 C-compound and carbohydrate metabolism
fgenesh1_pm.7_#_344	fgenesh1_pm.7_#_344	fgenesh1_pm.7_#_344	scaffold_7:1142020-1144509	68.4448	20.8464	-1.71514	4.62139e-06	yes	129671	IPR007604:CP2 transcription factor	sp|Q5M7R9|GRHL2_XENTR Grainyhead-like protein 2 homolog OS=Xenopus tropicalis GN=grhl2 PE=2 SV=1:95.5153	-	KOG4091:Transcription factor	-	11.02.03.04 transcriptional control
e_gw1.16.44.1	e_gw1.16.44.1	e_gw1.16.44.1	scaffold_16:77196-78931	45.9111	13.9495	-1.71863	0.00010305	yes	84874	IPR015424:Pyridoxal phosphate-dependent transferase, major region;;IPR010111:Kynureninase;;IPR000192:Aminotransferase, class V/Cysteine desulphurase	sp|Q7S332|KYNU2_NEUCR Kynureninase 2 OS=Neurospora crassa GN=bna-5-2 PE=3 SV=1:687.567	3.7.1.3:Kynureninase.	KOG3846:L-kynurenine hydrolase	pyridoxal phosphate binding:GO:0030170;;cytoplasm:GO:0005737;;metabolic process:GO:0008152;;kynureninase activity:GO:0030429;;tryptophan catabolic process:GO:0006569;;NAD biosynthetic process:GO:0009435	01.01.09.06 metabolism of tryptophan	01.01.09.06.02 degradation of tryptophan	01.02.02 nitrogen metabolism	01.07.01 biosynthesis of vitamins, cofactors, and prosthetic groups N.crassa	14.13 protein/peptide degradation	16.21.17 pyridoxal phosphate binding
fgenesh1_pg.3_#_46	fgenesh1_pg.3_#_46	fgenesh1_pg.3_#_46	scaffold_3:146032-147647	14.3957	4.3708	-1.71966	0.00224301	yes	33168	IPR015821:Glycoside hydrolase, family 18, N-terminal;;IPR017853:Glycoside hydrolase, catalytic core;;IPR001223:Glycoside hydrolase, family 18, catalytic domain;;IPR001579:Glycoside hydrolase, chitinase active site;;IPR011583:Chitinase II	sp|Q1E3R8|CHI1_COCIM Endochitinase 1 OS=Coccidioides immitis (strain RS) GN=CTS1 PE=3 SV=1:362.459	3.2.1.14:Chitinase.	KOG2806:Chitinase	endochitinase activity:GO:0008843;;hydrolase activity, hydrolyzing O-glycosyl compounds:GO:0004553;;carbohydrate metabolic process:GO:0005975;;chitin catabolic process:GO:0006032;;chitinase activity:GO:0004568	01.05.03 polysaccharide metabolism	01.05.09.04 aminosaccharide anabolism	01.05.09.07 aminosaccharide catabolism
estExt_fgenesh2_kg.C_1_t10088	estExt_fgenesh2_kg.C_1_t10088	estExt_fgenesh2_kg.C_1_t10088	scaffold_1:621975-624907	1178.11	357.06	-1.72224	0.00224301	yes	121479	IPR003042:Aromatic-ring hydroxylase;;IPR013027:FAD-dependent pyridine nucleotide-disulphide oxidoreductase;;IPR012941:Phenol hydroxylase, C-terminal dimerisation;;IPR002938:Monooxygenase, FAD-binding;;IPR012336:Thioredoxin-like fold	sp|P15245|PH2M_TRICU Phenol 2-monooxygenase OS=Trichosporon cutaneum PE=1 SV=3:64.3142;;sp|P15245|PH2M_TRICU Phenol 2-monooxygenase OS=Trichosporon cutaneum PE=1 SV=3:219.164	1.14.13.7:Phenol 2-monooxygenase.	KOG3855:Monooxygenase involved in coenzyme Q (ubiquinone) biosynthesis	metabolic process:GO:0008152;;aromatic compound metabolic process:GO:0006725;;electron transport:GO:0006118;;oxidoreductase activity:GO:0016491;;monooxygenase activity:GO:0004497;;phenol 2-monooxygenase activity:GO:0018662	01.05.11.07.01 aerobic aromate catabolism	01.05.11.07.02 anaerobic aromate catabolism
gm1.7978_g	gm1.7978_g	gm1.7978_g	scaffold_29:318087-321159	77.661	23.4967	-1.72474	2.4766e-06	yes	12422	IPR007114:Major facilitator superfamily;;IPR011701:Major facilitator superfamily MFS-1;;IPR016196:MFS general substrate transporter	sp|O94343|YHMA_SCHPO Uncharacterized MFS-type transporter C1271.10c OS=Schizosaccharomyces pombe (strain ATCC 38366 / 972) GN=SPBC1271.10c PE=1 SV=1:114.39;;sp|O94343|YHMA_SCHPO Uncharacterized MFS-type transporter C1271.10c OS=Schizosaccharomyces pombe (strain ATCC 38366 / 972) GN=SPBC1271.10c PE=1 SV=1:88.9669	-	KOG0255:Synaptic vesicle transporter SVOP and related transporters (major facilitator superfamily)	transporter activity:GO:0005215;;integral to membrane:GO:0016021;;transport:GO:0006810	20.01.27 drug/toxin transport	20.03 transport facilities
fgenesh1_pg.7_#_46	fgenesh1_pg.7_#_46	fgenesh1_pg.7_#_46	scaffold_7:170975-172666	18.5674	5.58869	-1.73219	0.00107624	yes	34878	IPR001563:Peptidase S10, serine carboxypeptidase	sp|C5P212|CBPYA_COCP7 Carboxypeptidase Y homolog A OS=Coccidioides posadasii (strain C735) GN=cpyA PE=3 SV=1:210.69	3.4.16.-:Serine-type carboxypeptidases.	KOG1282:Serine carboxypeptidases (lysosomal cathepsin A)	proteolysis:GO:0006508;;serine carboxypeptidase activity:GO:0004185	14.13.01 cytoplasmic and nuclear protein degradation S.cerevisiae	14.13.04.02 vacuolar protein degradation
e_gw1.21.284.1	e_gw1.21.284.1	e_gw1.21.284.1	scaffold_21:254239-255622	23.3966	7.0301	-1.73468	0.00175268	yes	87321	IPR002155:Thiolase;;IPR016039:Thiolase-like;;IPR013751:3-Oxoacyl-[acyl-carrier-protein (ACP)] synthase III	sp|Q07598|NLTP_CHICK Non-specific lipid-transfer protein (Fragment) OS=Gallus gallus GN=SCP2 PE=2 SV=1:441.425	2.3.1.16:Acetyl-CoA C-acyltransferase.	KOG1406:Peroxisomal 3-ketoacyl-CoA-thiolase P-44/SCP2	metabolic process:GO:0008152;;catalytic activity:GO:0003824;;acetyl-CoA C-acyltransferase activity:GO:0003988	20.01.13 lipid/fatty acid transport	20.09 transport routes	16.09 lipid binding
e_gw1.47.48.1	e_gw1.47.48.1	e_gw1.47.48.1	scaffold_47:54169-54868	69.9352	20.9827	-1.73682	0.000705664	yes	93138	IPR011051:Cupin, RmlC-type	-	-	-	-
fgenesh1_pm.16_#_30	fgenesh1_pm.16_#_30	fgenesh1_pm.16_#_30	scaffold_16:81581-82644	14.8236	4.43181	-1.74192	0.00557642	yes	131928	IPR002220:Dihydrodipicolinate synthetase	sp|Q5BD77|HOGA1_EMENI Probable 4-hydroxy-2-oxoglutarate aldolase, mitochondrial OS=Emericella nidulans GN=AN1503 PE=1 SV=1:247.669	4.2.1.52:Dihydrodipicolinate synthase.	-	lyase activity:GO:0016829;;metabolic process:GO:0008152;;dihydrodipicolinate synthase activity:GO:0008840	01.01.05.03 metabolism of urea (urea cycle)	01.01.06.06.01 biosynthesis of lysine	01.01.06.06.01.01 diaminopimelic acid pathway
estExt_fgenesh1_pm.C_70249	estExt_fgenesh1_pm.C_70249	estExt_fgenesh1_pm.C_70249	scaffold_7:851052-853310	822.138	245.745	-1.74222	0.00111582	yes	136988	IPR005828:General substrate transporter;;IPR007114:Major facilitator superfamily;;IPR003663:Sugar transporter;;IPR016196:MFS general substrate transporter;;IPR005829:Sugar transporter, conserved site	sp|Q92253|RCO3_NEUCR Probable glucose transporter rco-3 OS=Neurospora crassa GN=rco-3 PE=3 SV=2:335.109	5.3.1.4:L-arabinose isomerase.	KOG0254:Predicted transporter (major facilitator superfamily)	sugar:hydrogen symporter activity:GO:0005351;;L-arabinose isomerase activity:GO:0008733;;carbohydrate transport:GO:0008643;;transporter activity:GO:0005215;;integral to membrane:GO:0016021;;transport:GO:0006810;;membrane:GO:0016020	01.05 C-compound and carbohydrate metabolism	01.05.25 regulation of C-compound and carbohydrate metabolism N.crassa	20.01.03 C-compound and carbohydrate transport	20.01.03.01 sugar transport	20.09.16 cellular export and secretion	20.09.18 cellular import	20.09.18.07 non-vesicular cellular import	34.11.12 perception of nutrients and nutritional adaptation N.crassa	20.03 transport facilities
e_gw1.2.365.1	e_gw1.2.365.1	e_gw1.2.365.1	scaffold_2:1747249-1747687	116.932	34.8886	-1.74485	0.00445826	yes
gm1.1448_g	gm1.1448_g	gm1.1448_g	scaffold_2:1552898-1555566	14.7108	4.38487	-1.74627	0.000810182	yes	5892	IPR001138:Fungal transcriptional regulatory protein, N-terminal	sp|P49412|PRIB_LENED Protein priB OS=Lentinula edodes GN=priB PE=2 SV=1:64.6994	-	-	regulation of transcription, DNA-dependent:GO:0006355;;nucleus:GO:0005634;;zinc ion binding:GO:0008270;;transcription factor activity:GO:0003700
gm1.3059_g	gm1.3059_g	gm1.3059_g	scaffold_6:23693-24725	16.5385	4.92188	-1.74855	0.00568008	yes	7503	IPR017853:Glycoside hydrolase, catalytic core;;IPR001223:Glycoside hydrolase, family 18, catalytic domain;;IPR001579:Glycoside hydrolase, chitinase active site;;IPR011583:Chitinase II	sp|P27050|CHID_BACCI Chitinase D OS=Bacillus circulans GN=chiD PE=1 SV=4:138.272	-	-	hydrolase activity, hydrolyzing O-glycosyl compounds:GO:0004553;;carbohydrate metabolic process:GO:0005975;;chitin catabolic process:GO:0006032;;chitinase activity:GO:0004568	01.05 C-compound and carbohydrate metabolism
estExt_Genewise1Plus.C_270315	estExt_Genewise1Plus.C_270315	estExt_Genewise1Plus.C_270315	scaffold_27:345345-349094	20.458	6.08153	-1.75016	3.34364e-05	yes	103853	IPR002345:Lipocalin;;IPR002110:Ankyrin	sp|Q1RHT6|Y997_RICBR Putative ankyrin repeat protein RBE_0997 OS=Rickettsia bellii (strain RML369-C) GN=RBE_0997 PE=4 SV=1:73.9442	-	KOG4177:Ankyrin	transporter activity:GO:0005215;;transport:GO:0006810;;binding:GO:0005488
e_gw1.33.108.1	e_gw1.33.108.1	e_gw1.33.108.1	scaffold_33:137782-138304	45.7545	13.5526	-1.75534	0.00385136	yes	91480	IPR000194:ATPase, F1/V1/A1 complex, alpha/beta subunit, nucleotide-binding	-	-	-	proton-transporting two-sector ATPase complex:GO:0016469;;hydrogen ion transmembrane transporter activity:GO:0015078
estExt_Genewise1Plus.C_210056	estExt_Genewise1Plus.C_210056	estExt_Genewise1Plus.C_210056	scaffold_21:53503-54968	606.589	177.477	-1.77309	0.000126276	yes	102759	IPR001260:Coproporphyrinogen III oxidase	sp|P11353|HEM6_YEAST Coproporphyrinogen-III oxidase OS=Saccharomyces cerevisiae (strain ATCC 204508 / S288c) GN=HEM13 PE=1 SV=2:392.504	1.3.3.3:Coproporphyrinogen oxidase.	KOG1518:Coproporphyrinogen III oxidase CPO/HEM13	porphyrin biosynthetic process:GO:0006779;;coproporphyrinogen oxidase activity:GO:0004109	01.07.01 biosynthesis of vitamins, cofactors, and prosthetic groups S.cerevisiae	01.20.19.01 metabolism of porphyrins	16.17.09 heavy metal binding (Cu, Fe, Zn)
estExt_fgenesh1_pg.C_220128	estExt_fgenesh1_pg.C_220128	estExt_fgenesh1_pg.C_220128	scaffold_22:469151-470657	26.1741	7.62791	-1.77878	0.000607255	yes	142683	IPR013216:Methyltransferase type 11	sp|Q72HI4|UBIE_THET2 Demethylmenaquinone methyltransferase OS=Thermus thermophilus (strain HB27 / ATCC BAA-163 / DSM 7039) GN=ubiE PE=3 SV=1:56.225	-	-	metabolic process:GO:0008152;;methyltransferase activity:GO:0008168
estExt_fgenesh2_kg.C_60065	estExt_fgenesh2_kg.C_60065	estExt_fgenesh2_kg.C_60065	scaffold_6:615096-616247	71.2618	20.6706	-1.78555	0.000203905	yes
estExt_Genemark1.C_40225	estExt_Genemark1.C_40225	estExt_Genemark1.C_40225	scaffold_4:843175-844380	362.727	104.715	-1.79241	2.97362e-06	yes	24207	IPR002042:Uricase	sp|P33282|URIC_EMENI Uricase OS=Emericella nidulans GN=uaZ PE=3 SV=1:433.721	1.7.3.3:Urate oxidase.	KOG1599:Uricase (urate oxidase)	urate oxidase activity:GO:0004846;;purine base metabolic process:GO:0006144	01.03.01 purin nucleotide/nucleoside/nucleobase metabolism	01.03.01.01 purine nucleotide /nucleoside/nucleobase catabolism N.crassa
fgenesh1_pg.8_#_70	fgenesh1_pg.8_#_70	fgenesh1_pg.8_#_70	scaffold_8:263322-266565	70.4804	20.2974	-1.79592	6.06828e-07	yes	35280	IPR016024:Armadillo-type fold;;IPR007483:Hamartin	sp|Q09778|TSC1_SCHPO Tuberous sclerosis 1 protein homolog OS=Schizosaccharomyces pombe (strain ATCC 38366 / 972) GN=tsc1 PE=2 SV=1:117.087	-	KOG3756:Pinin (desmosome-associated protein)	binding:GO:0005488
e_gw1.7.830.1	e_gw1.7.830.1	e_gw1.7.830.1	scaffold_7:571646-572451	107.413	30.8034	-1.80201	9.16172e-05	yes	77893	IPR000791:GPR1/FUN34/yaaH	sp|P32907|ATO2_YEAST Ammonia transport outward protein 2 OS=Saccharomyces cerevisiae (strain ATCC 204508 / S288c) GN=ATO2 PE=1 SV=1:120.553	-	-	membrane:GO:0016020	01.02 nitrogen, sulfur and selenium metabolism S.cerevisiae	01.03.16.03 DNA degradation	01.05.25 regulation of C-compound and carbohydrate metabolism S.cerevisiae	10.01 DNA processing	10.03.02 meiosis	20.01.01.01 cation transport (H+, Na+, K+, Ca2+ , NH4+, etc.) S.cerevisiae	20.01.03 C-compound and carbohydrate transport	20.03 transport facilities	20.03.02.03.01 proton driven antiporter
estExt_fgenesh1_pg.C_1_t10411	estExt_fgenesh1_pg.C_1_t10411	estExt_fgenesh1_pg.C_1_t10411	scaffold_1:1663494-1665007	232.801	66.5461	-1.80667	1.22405e-06	yes	139783	IPR001754:Orotidine 5'-phosphate decarboxylase, core;;IPR011060:Ribulose-phosphate binding barrel;;IPR014732:Orotidine 5'-phosphate decarboxylase, subfamily 1, core	sp|P21594|PYRF_TRIRE Orotidine 5&apos;-phosphate decarboxylase OS=Trichoderma reesei GN=ura3 PE=3 SV=1:783.867	-	KOG1377:Uridine 5'- monophosphate synthase/orotate phosphoribosyltransferase	metabolic process:GO:0008152;;orotidine-5'-phosphate decarboxylase activity:GO:0004590;;catalytic activity:GO:0003824;;'de novo' pyrimidine base biosynthetic process:GO:0006207	01.03.04 pyrimidine nucleotide/nucleoside/nucleobase metabolism N.crassa
fgenesh1_pg.18_#_49	fgenesh1_pg.18_#_49	fgenesh1_pg.18_#_49	scaffold_18:165339-166322	40.6529	11.5925	-1.81016	0.000488505	yes
estExt_fgenesh1_pg.C_50139	estExt_fgenesh1_pg.C_50139	estExt_fgenesh1_pg.C_50139	scaffold_5:519975-522617	251.492	71.3642	-1.81724	1.96982e-06	yes	140778	IPR007219:Fungal specific transcription factor;;IPR001138:Fungal transcriptional regulatory protein, N-terminal	sp|Q10086|YAO7_SCHPO Uncharacterized transcriptional regulatory protein C11D3.07c OS=Schizosaccharomyces pombe (strain ATCC 38366 / 972) GN=SPAC11D3.07c PE=2 SV=3:98.9821	-	-	regulation of transcription, DNA-dependent:GO:0006355;;nucleus:GO:0005634;;zinc ion binding:GO:0008270;;transcription:GO:0006350;;DNA binding:GO:0003677;;transcription factor activity:GO:0003700
estExt_Genewise1.C_13_t20074	estExt_Genewise1.C_13_t20074	estExt_Genewise1.C_13_t20074	scaffold_13:732389-732943	133.672	37.7688	-1.82343	0.000126602	yes	112552	-	-	-	KOG3684:Ca2+-activated K+ channel proteins (intermediate/small conductance classes)	-
e_gw1.14.536.1	e_gw1.14.536.1	e_gw1.14.536.1	scaffold_14:514820-516198	18.0752	5.08411	-1.82994	0.00152473	yes	83874	-	sp|P38677|CMLE_NEUCR Carboxy-cis,cis-muconate cyclase OS=Neurospora crassa GN=NCU04071 PE=1 SV=3:565.074	-	-	-
gm1.5852_g	gm1.5852_g	gm1.5852_g	scaffold_15:586607-587132	40.1096	11.2688	-1.83162	0.00257829	yes	10296	IPR002125:CMP/dCMP deaminase, zinc-binding;;IPR016193:Cytidine deaminase-like	-	-	KOG1018:Cytosine deaminase FCY1 and related enzymes	zinc ion binding:GO:0008270;;hydrolase activity:GO:0016787;;catalytic activity:GO:0003824
estExt_Genewise1Plus.C_9_t10395	estExt_Genewise1Plus.C_9_t10395	estExt_Genewise1Plus.C_9_t10395	scaffold_9:517891-519880	364.931	101.924	-1.84014	2.75226e-06	yes	99336	IPR000679:Zinc finger, GATA-type	sp|Q54TE3|GTAJ_DICDI GATA zinc finger domain-containing protein 10 OS=Dictyostelium discoideum GN=gtaJ PE=4 SV=1:73.1738	-	KOG1187:Serine/threonine protein kinase	regulation of transcription, DNA-dependent:GO:0006355;;nucleus:GO:0005634;;zinc ion binding:GO:0008270;;transcription factor activity:GO:0003700;;sequence-specific DNA binding:GO:0043565
fgenesh2_kg.7_#_109_#_gi|30121351|gb|CB906693.1|CB906693	fgenesh2_kg.7_#_109_#_gi|30121351|gb|CB906693.1|CB906693	fgenesh2_kg.7_#_109_#_gi|30121351|gb|CB906693.1|CB906693	scaffold_7:922099-922449	163.582	45.6069	-1.84269	0.00124643	yes
fgenesh2_kg.4_#_63_#_gi|38134872|gb|CF880190.1|CF880190	fgenesh2_kg.4_#_63_#_gi|38134872|gb|CF880190.1|CF880190	fgenesh2_kg.4_#_63_#_gi|38134872|gb|CF880190.1|CF880190	scaffold_4:850905-851467	87.8942	24.4859	-1.84382	0.000766025	yes
gw1.4.403.1	gw1.4.403.1	gw1.4.403.1	scaffold_4:1572944-1573136	1939.72	539.688	-1.84565	0.00316078	yes	48263	IPR005336:Protein of unknown function UPF0041	sp|P53157|FMP37_YEAST UPF0041 protein FMP37 OS=Saccharomyces cerevisiae (strain ATCC 204508 / S288c) GN=FMP37 PE=1 SV=1:85.1149	-	KOG1590:Uncharacterized conserved protein	-	40.10.02 apoptosis (type I programmed cell death) &nbsp;
e_gw1.38.59.1	e_gw1.38.59.1	e_gw1.38.59.1	scaffold_38:92448-93587	499.841	138.978	-1.84661	5.67579e-07	yes	92240	IPR012269:Aquaporin;;IPR000425:Major intrinsic protein	sp|P43549|YFF4_YEAST Uncharacterized membrane protein YFL054C OS=Saccharomyces cerevisiae (strain ATCC 204508 / S288c) GN=YFL054C PE=1 SV=1:204.912	-	KOG0224:Aquaporin (major intrinsic protein family)	transporter activity:GO:0005215;;integral to membrane:GO:0016021;;transport:GO:0006810;;membrane:GO:0016020	20.01.03 C-compound and carbohydrate transport	20.01.11 amine / polyamine transport	20.09.18 cellular import	20.03 transport facilities	20.03.01 channel / pore class transport
gm1.2673_g	gm1.2673_g	gm1.2673_g	scaffold_4:1505287-1507663	15.7909	4.39036	-1.84668	0.000245344	yes	7117	IPR007219:Fungal specific transcription factor;;IPR001138:Fungal transcriptional regulatory protein, N-terminal	sp|Q9P6I9|YHDD_SCHPO Uncharacterized transcriptional regulatory protein C1683.13c OS=Schizosaccharomyces pombe (strain ATCC 38366 / 972) GN=SPBC1683.13c PE=1 SV=1:343.584	-	-	regulation of transcription, DNA-dependent:GO:0006355;;nucleus:GO:0005634;;zinc ion binding:GO:0008270;;transcription:GO:0006350;;DNA binding:GO:0003677;;transcription factor activity:GO:0003700
estExt_fgenesh1_pm.C_90176	estExt_fgenesh1_pm.C_90176	estExt_fgenesh1_pm.C_90176	scaffold_9:617730-618778	14.2764	3.94142	-1.85684	0.00282146	yes	137346	IPR001395:Aldo/keto reductase	sp|O94246|GSH0_SCHPO Putative glutamate--cysteine ligase regulatory subunit OS=Schizosaccharomyces pombe (strain ATCC 38366 / 972) GN=SPCC737.06c PE=2 SV=1:86.2705	6.3.2.2:Glutamate--cysteine ligase.	KOG3023:Glutamate-cysteine ligase regulatory subunit	glutamate-cysteine ligase complex:GO:0017109;;glutamate-cysteine ligase activity:GO:0004357;;oxidoreductase activity:GO:0016491	01.20.37.01 metabolism of thioredoxin, glutaredoxin, glutathion N.crassa
fgenesh1_pm.27_#_13	fgenesh1_pm.27_#_13	fgenesh1_pm.27_#_13	scaffold_27:55661-56966	98.1322	26.9422	-1.86486	3.57373e-06	yes	133809	IPR002328:Alcohol dehydrogenase, zinc-containing, conserved site;;IPR016040:NAD(P)-binding;;IPR013154:Alcohol dehydrogenase GroES-like;;IPR013149:Alcohol dehydrogenase, zinc-binding;;IPR011032:GroES-like	sp|O94038|ADH2_CANAL Alcohol dehydrogenase 2 OS=Candida albicans GN=ADH2 PE=1 SV=1:262.692	1.1.1.1:Alcohol dehydrogenase.	KOG0023:Alcohol dehydrogenase, class V	alcohol dehydrogenase activity, iron-dependent:GO:0004025;;alcohol dehydrogenase activity, metal ion-independent:GO:0004023;;alcohol dehydrogenase activity:GO:0004022;;zinc ion binding:GO:0008270;;metabolic process:GO:0008152;;catalytic activity:GO:0003824;;oxidoreductase activity:GO:0016491;;binding:GO:0005488;;alcohol dehydrogenase activity, zinc-dependent:GO:0004024	01.05 C-compound and carbohydrate metabolism	01.05.06.07 C-2 compound and organic acid catabolism S.cerevisiae	01.06 lipid, fatty acid and isoprenoid metabolism N.crassa	02.01 glycolysis and gluconeogenesis	02.16 fermentation	02.16.01 alcohol fermentation	32.07 detoxification	16.17.09 heavy metal binding (Cu, Fe, Zn)
e_gw1.3.1600.1	e_gw1.3.1600.1	e_gw1.3.1600.1	scaffold_3:70834-71878	42.567	11.6188	-1.87327	0.000139174	yes	72821	IPR001279:Beta-lactamase-like	sp|Q769K2|NAPEP_RAT N-acyl-phosphatidylethanolamine-hydrolyzing phospholipase D OS=Rattus norvegicus GN=Napepld PE=1 SV=1:214.542	-	KOG3798:Predicted Zn-dependent hydrolase (beta-lactamase superfamily)	hydrolase activity:GO:0016787
fgenesh1_pm.18_#_85	fgenesh1_pm.18_#_85	fgenesh1_pm.18_#_85	scaffold_18:295986-296796	112.042	30.5015	-1.87709	1.28206e-05	yes
estExt_Genewise1Plus.C_3_t20443	estExt_Genewise1Plus.C_3_t20443	estExt_Genewise1Plus.C_3_t20443	scaffold_3:1127136-1129250	47.3296	12.7809	-1.88875	2.63079e-06	yes	96485	IPR000909:Phospholipase C, phosphatidylinositol-specific , X region;;IPR001192:Phospholipase C, phosphoinositol-specific, C-terminal (PLC);;IPR008973:C2 calcium/lipid-binding region, CaLB;;IPR013841:Phospholipase C, phosphatidylinositol-specific , X and Y boxes;;IPR001711:Phospholipase C, phosphatidylinositol-specific, Y domain	sp|P40977|PLC1_SCHPO 1-phosphatidylinositol-4,5-bisphosphate phosphodiesterase 1 OS=Schizosaccharomyces pombe (strain ATCC 38366 / 972) GN=plc1 PE=1 SV=1:192.2	3.1.4.11:1-phosphatidylinositol-4,5-bisphosphate phosphodiesterase.	KOG0169:Phosphoinositide-specific phospholipase C	phosphoinositide phospholipase C activity:GO:0004435;;signal transduction:GO:0007165;;phospholipase C activity:GO:0004629;;lipid metabolic process:GO:0006629;;intracellular signaling cascade:GO:0007242	01.06 lipid, fatty acid and isoprenoid metabolism N.crassa	30.01.09.11 polyphosphoinositol mediated signal transduction N.crassa
estExt_Genewise1Plus.C_7_t20167	estExt_Genewise1Plus.C_7_t20167	estExt_Genewise1Plus.C_7_t20167	scaffold_7:832780-835898	188.545	50.8688	-1.89006	7.93961e-07	yes	98413	IPR006153:Sodium/hydrogen exchanger	sp|Q9P7I1|KHA1_SCHPO K(+)/H(+) antiporter 1 OS=Schizosaccharomyces pombe (strain ATCC 38366 / 972) GN=kha1 PE=2 SV=1:447.588	-	KOG1650:Predicted K+/H+-antiporter	solute:hydrogen antiporter activity:GO:0015299;;regulation of pH:GO:0006885;;integral to membrane:GO:0016021	20.01.01.01 cation transport (H+, Na+, K+, Ca2+ , NH4+, etc.) N.crassa	34.01.01.01 homeostasis of metal ions (Na, K, Ca etc.) N.crassa	34.01.01.03 homeostasis of protons
fgenesh1_pm.16_#_59	fgenesh1_pm.16_#_59	fgenesh1_pm.16_#_59	scaffold_16:199449-200271	585.701	157.738	-1.89264	3.33713e-07	yes
fgenesh1_pg.13_#_136	fgenesh1_pg.13_#_136	fgenesh1_pg.13_#_136	scaffold_13:534320-535816	68.7011	18.4376	-1.89768	2.75226e-06	yes	36636	IPR003780:Cytochrome oxidase assembly	sp|Q10361|ETP1_SCHPO Electron transfer protein 1, mitochondrial OS=Schizosaccharomyces pombe (strain ATCC 38366 / 972) GN=etp1 PE=1 SV=2:400.208	-	KOG2725:Cytochrome oxidase assembly factor COX15	protein complex assembly:GO:0006461;;membrane:GO:0016020	01.07.01 biosynthesis of vitamins, cofactors, and prosthetic groups S.cerevisiae	01.20.19.01 metabolism of porphyrins	02.13 respiration	02.13.03 aerobic respiration	14.10 assembly of protein complexes	16.01 protein binding
gm1.3334_g	gm1.3334_g	gm1.3334_g	scaffold_6:943799-945189	160.456	42.9305	-1.9021	1.95084e-07	yes
estExt_fgenesh1_pg.C_60145	estExt_fgenesh1_pg.C_60145	estExt_fgenesh1_pg.C_60145	scaffold_6:476173-478095	29.6616	7.931	-1.90302	3.93677e-05	yes	140920	IPR007114:Major facilitator superfamily;;IPR011701:Major facilitator superfamily MFS-1;;IPR016196:MFS general substrate transporter	sp|P36035|JEN1_YEAST Carboxylic acid transporter protein homolog OS=Saccharomyces cerevisiae (strain ATCC 204508 / S288c) GN=JEN1 PE=1 SV=1:230.335	-	KOG0255:Synaptic vesicle transporter SVOP and related transporters (major facilitator superfamily)	transporter activity:GO:0005215;;integral to membrane:GO:0016021;;transport:GO:0006810	01.05 C-compound and carbohydrate metabolism	20.01.03 C-compound and carbohydrate transport	20.03 transport facilities
estExt_Genemark1.C_440012	estExt_Genemark1.C_440012	estExt_Genemark1.C_440012	scaffold_44:47189-48149	58.0927	15.4835	-1.90763	0.000105357	yes	27007	IPR000991:Glutamine amidotransferase class-I, C-terminal	sp|Q09686|YA14_SCHPO Putative glutamine amidotransferase-like protein C13C5.04 OS=Schizosaccharomyces pombe (strain ATCC 38366 / 972) GN=SPAC13C5.04 PE=2 SV=1:156.762	-	KOG3179:Predicted glutamine synthetase	catalytic activity:GO:0003824
fgenesh2_kg.4_#_89_#_gi|30117840|gb|CB903182.1|CB903182	fgenesh2_kg.4_#_89_#_gi|30117840|gb|CB903182.1|CB903182	fgenesh2_kg.4_#_89_#_gi|30117840|gb|CB903182.1|CB903182	scaffold_4:1026959-1027182	298.415	79.079	-1.91596	0.00926558	yes
e_gw1.38.9.1	e_gw1.38.9.1	e_gw1.38.9.1	scaffold_38:57190-58744	14.2495	3.74138	-1.92926	0.000417592	yes	92315	IPR007114:Major facilitator superfamily;;IPR011701:Major facilitator superfamily MFS-1;;IPR016196:MFS general substrate transporter	sp|Q12256|TPO4_YEAST Polyamine transporter 4 OS=Saccharomyces cerevisiae (strain ATCC 204508 / S288c) GN=TPO4 PE=1 SV=1:259.225	-	KOG0255:Synaptic vesicle transporter SVOP and related transporters (major facilitator superfamily)	transporter activity:GO:0005215;;integral to membrane:GO:0016021;;transport:GO:0006810	20.01.27 drug/toxin transport	32.05.05.01 toxins	32.07 detoxification	32.07.05 detoxification by export	34.11.03 chemoperception and response	20.03.02.03.01 proton driven antiporter
estExt_fgenesh1_pm.C_50128	estExt_fgenesh1_pm.C_50128	estExt_fgenesh1_pm.C_50128	scaffold_5:439566-441065	399.346	103.177	-1.95251	1.02675e-06	yes	136573	IPR008333:Oxidoreductase FAD-binding region;;IPR001433:Oxidoreductase FAD/NAD(P)-binding;;IPR001834:NADH:cytochrome b5 reductase (CBR);;IPR009050:Globin-like;;IPR000971:Globin, subset	sp|P49852|HMP_BACSU Flavohemoprotein OS=Bacillus subtilis GN=hmp PE=2 SV=1:296.975	-	KOG3378:Globins and related hemoproteins	nitric oxide dioxygenase activity:GO:0008941;;electron transport:GO:0006118;;oxidoreductase activity:GO:0016491;;heme binding:GO:0020037;;iron ion binding:GO:0005506	01.02 nitrogen, sulfur and selenium metabolism N.crassa	02.13.01 anaerobic respiration	20.01.15 electron transport	32.01 stress response	32.05.01.03 chemical agent resistance
gw1.17.379.1	gw1.17.379.1	gw1.17.379.1	scaffold_17:361267-362132	28.0211	7.23671	-1.95311	0.000766025	yes	57941	IPR001279:Beta-lactamase-like	sp|A3FJ64|AHLL_BACTU N-acyl homoserine lactonase OS=Bacillus thuringiensis GN=aiiA PE=1 SV=2:53.9138	-	-	hydrolase activity:GO:0016787
estExt_fgenesh1_pm.C_140179	estExt_fgenesh1_pm.C_140179	estExt_fgenesh1_pm.C_140179	scaffold_14:614168-618974	14.298	3.69212	-1.95329	4.0954e-06	yes	138024	IPR003593:AAA+ ATPase, core;;IPR003439:ABC transporter-like	sp|Q8R420|ABCA3_MOUSE ATP-binding cassette sub-family A member 3 OS=Mus musculus GN=Abca3 PE=2 SV=2:186.808;;sp|Q8R420|ABCA3_MOUSE ATP-binding cassette sub-family A member 3 OS=Mus musculus GN=Abca3 PE=2 SV=2:146.747;;sp|Q8R420|ABCA3_MOUSE ATP-binding cassette sub-family A member 3 OS=Mus musculus GN=Abca3 PE=2 SV=2:381.333	-	KOG0059:Lipid exporter ABCA1 and related proteins, ABC superfamily	nucleoside-triphosphatase activity:GO:0017111;;ATP binding:GO:0005524;;ATPase activity:GO:0016887;;nucleotide binding:GO:0000166	16.19.03 ATP binding	20.03.25 ABC transporters
e_gw1.9.94.1	e_gw1.9.94.1	e_gw1.9.94.1	scaffold_9:825513-825720	1096.21	282.993	-1.95368	0.00204704	yes
estExt_fgenesh1_pg.C_240100	estExt_fgenesh1_pg.C_240100	estExt_fgenesh1_pg.C_240100	scaffold_24:325942-327921	93.2774	23.6908	-1.9772	1.31553e-07	yes	142761	-	sp|Q55DH0|Y1320_DICDI PI-PLC X domain-containing protein DDB_G0269228 OS=Dictyostelium discoideum GN=DDB_G0269228 PE=2 SV=1:60.077	-	KOG4306:Glycosylphosphatidylinositol-specific phospholipase C	-
estExt_Genemark1.C_200022	estExt_Genemark1.C_200022	estExt_Genemark1.C_200022	scaffold_20:81744-84799	321.482	80.989	-1.98894	1.90494e-07	yes	26134	-	-	3.2.1.14:Chitinase.	KOG2992:Nucleolar GTPase/ATPase p130	endochitinase activity:GO:0008843;;chitinase activity:GO:0004568
estExt_Genewise1Plus.C_260208	estExt_Genewise1Plus.C_260208	estExt_Genewise1Plus.C_260208	scaffold_26:249606-250384	20.8123	5.17647	-2.0074	0.000854683	yes	103648	IPR008984:SMAD/FHA domain;;IPR000253:Forkhead-associated	-	-	-	-
fgenesh1_pg.4_#_233	fgenesh1_pg.4_#_233	fgenesh1_pg.4_#_233	scaffold_4:884997-886379	93.6143	23.1439	-2.0161	4.08628e-07	yes	33886	IPR017853:Glycoside hydrolase, catalytic core;;IPR001223:Glycoside hydrolase, family 18, catalytic domain;;IPR001579:Glycoside hydrolase, chitinase active site;;IPR011583:Chitinase II	sp|Q1E3R8|CHI1_COCIM Endochitinase 1 OS=Coccidioides immitis (strain RS) GN=CTS1 PE=3 SV=1:194.897	3.2.1.14:Chitinase.	KOG2806:Chitinase	endochitinase activity:GO:0008843;;hydrolase activity, hydrolyzing O-glycosyl compounds:GO:0004553;;carbohydrate metabolic process:GO:0005975;;chitin catabolic process:GO:0006032;;chitinase activity:GO:0004568
estExt_Genewise1Plus.C_390082	estExt_Genewise1Plus.C_390082	estExt_Genewise1Plus.C_390082	scaffold_39:83896-88507	34.5771	8.52965	-2.01926	4.09183e-08	yes	104881	IPR003593:AAA+ ATPase, core;;IPR010929:CDR ABC transporter;;IPR013525:ABC-2 type transporter;;IPR003439:ABC transporter-like	sp|P41820|BFR1_SCHPO Brefeldin A resistance protein OS=Schizosaccharomyces pombe (strain ATCC 38366 / 972) GN=bfr1 PE=1 SV=1:1140.95	-	KOG0065:Pleiotropic drug resistance proteins (PDR1-15), ABC superfamily	nucleoside-triphosphatase activity:GO:0017111;;ATP binding:GO:0005524;;integral to membrane:GO:0016021;;transport:GO:0006810;;ATPase activity:GO:0016887;;ATPase activity, coupled to transmembrane movement of substances:GO:0042626;;nucleotide binding:GO:0000166	01.04 phosphate metabolism	01.05 C-compound and carbohydrate metabolism	20.01.01.01 cation transport (H+, Na+, K+, Ca2+ , NH4+, etc.) S.cerevisiae	20.01.03 C-compound and carbohydrate transport	20.01.13 lipid/fatty acid transport	20.01.27 drug/toxin transport	20.09.16.01 Type I protein secretion system (ABC-type transport systems) N.crassa	32.01.01 oxidative stress response	32.05.01.03 chemical agent resistance	32.07 detoxification	32.07.05 detoxification by export	34.01.01.01 homeostasis of metal ions (Na, K, Ca etc.) S.cerevisiae	16.19.03 ATP binding	20.03.22 transport ATPases	20.03.25 ABC transporters
e_gw1.29.72.1	e_gw1.29.72.1	e_gw1.29.72.1	scaffold_29:128892-129851	21.2558	5.23097	-2.02271	0.00084857	yes	90483	IPR016181:Acyl-CoA N-acyltransferase;;IPR000182:GCN5-related N-acetyltransferase	-	-	-	metabolic process:GO:0008152;;N-acetyltransferase activity:GO:0008080
e_gw1.6.526.1	e_gw1.6.526.1	e_gw1.6.526.1	scaffold_6:338035-339013	51.1844	12.5595	-2.02692	2.90949e-05	yes	76606	IPR004136:2-nitropropane dioxygenase, NPD	sp|O06179|Y1533_MYCTU Putative monooxygenase Rv1533 OS=Mycobacterium tuberculosis GN=Rv1533 PE=3 SV=1:121.324	-	-	electron transport:GO:0006118;;oxidoreductase activity:GO:0016491	01.02 nitrogen, sulfur and selenium metabolism L.innocua	01.05 C-compound and carbohydrate metabolism	01.05.10.07 aliphatic hydrocarbon catabolism	01.06 lipid, fatty acid and isoprenoid metabolism N.crassa	20.01.15 electron transport	16.21.05 FAD/FMN binding
estExt_Genewise1Plus.C_11_t10295	estExt_Genewise1Plus.C_11_t10295	estExt_Genewise1Plus.C_11_t10295	scaffold_11:357034-359230	20.9305	5.13338	-2.02763	2.09972e-05	yes	100056	IPR007087:Zinc finger, C2H2-type	-	-	KOG1721:FOG: Zn-finger	nucleic acid binding:GO:0003676;;zinc ion binding:GO:0008270;;intracellular:GO:0005622
e_gw1.1.1399.1	e_gw1.1.1399.1	e_gw1.1.1399.1	scaffold_1:2310886-2314330	581.515	142.278	-2.0311	3.884e-05	yes	70020	IPR003097:FAD-binding, type 1;;IPR001433:Oxidoreductase FAD/NAD(P)-binding;;IPR001128:Cytochrome P450;;IPR001709:Flavoprotein pyridine nucleotide cytochrome reductase;;IPR008254:Flavodoxin/nitric oxide synthase;;IPR001094:Flavodoxin-like;;IPR001680:WD40 repeat;;IPR002401:Cytochrome P450, E-class, group I	sp|Q9Y8G7|C505_FUSOX Bifunctional P-450:NADPH-P450 reductase OS=Fusarium oxysporum GN=CYP505 PE=1 SV=1:920.998	1.6.2.4:NADPH--ferrihemoprotein reductase.	KOG1158:NADP/FAD dependent oxidoreductase	NADPH-hemoprotein reductase activity:GO:0003958;;electron transport:GO:0006118;;electron carrier activity:GO:0009055;;oxidoreductase activity:GO:0016491;;heme binding:GO:0020037;;monooxygenase activity:GO:0004497;;FMN binding:GO:0010181;;iron ion binding:GO:0005506	01.05 C-compound and carbohydrate metabolism	02.25 oxidation of fatty acids
e_gw1.12.275.1	e_gw1.12.275.1	e_gw1.12.275.1	scaffold_12:599218-600119	34.1622	8.34677	-2.03311	0.000380667	yes	82632	IPR008952:Tetraspanin	-	-	-	integral to membrane:GO:0016021	30.01 cellular signalling
estExt_Genewise1Plus.C_12_t10250	estExt_Genewise1Plus.C_12_t10250	estExt_Genewise1Plus.C_12_t10250	scaffold_12:365767-366916	56.5249	13.482	-2.06786	3.57373e-06	yes	100441	IPR006025:Peptidase M, neutral zinc metallopeptidases, zinc-binding site	-	-	-	metallopeptidase activity:GO:0008237;;zinc ion binding:GO:0008270;;proteolysis:GO:0006508
e_gw1.4.746.1	e_gw1.4.746.1	e_gw1.4.746.1	scaffold_4:124855-126950	161.659	38.5493	-2.06817	5.47934e-09	yes	74437	IPR005828:General substrate transporter;;IPR007114:Major facilitator superfamily;;IPR003663:Sugar transporter;;IPR016196:MFS general substrate transporter;;IPR005829:Sugar transporter, conserved site	sp|Q9XIH7|PLT1_ARATH Putative polyol transporter 1 OS=Arabidopsis thaliana GN=PLT1 PE=2 SV=1:196.052	5.3.1.4:L-arabinose isomerase.	KOG0254:Predicted transporter (major facilitator superfamily)	sugar:hydrogen symporter activity:GO:0005351;;L-arabinose isomerase activity:GO:0008733;;carbohydrate transport:GO:0008643;;transporter activity:GO:0005215;;integral to membrane:GO:0016021;;transport:GO:0006810;;membrane:GO:0016020	01.05 C-compound and carbohydrate metabolism	01.06 lipid, fatty acid and isoprenoid metabolism N.crassa	20.01.03 C-compound and carbohydrate transport	20.01.13 lipid/fatty acid transport	20.09.16 cellular export and secretion	20.09.18 cellular import	20.09.18.07 non-vesicular cellular import	20.03 transport facilities
estExt_Genewise1Plus.C_8_t10120	estExt_Genewise1Plus.C_8_t10120	estExt_Genewise1Plus.C_8_t10120	scaffold_8:139304-140090	27.7512	6.55567	-2.08174	0.000230242	yes	98759	IPR009002:FMN-binding split barrel, related	-	-	KOG4558:Uncharacterized conserved protein	-
fgenesh2_kg.30_#_72_#_gi|38135990|gb|CF881308.1|CF881308	fgenesh2_kg.30_#_72_#_gi|38135990|gb|CF881308.1|CF881308	fgenesh2_kg.30_#_72_#_gi|38135990|gb|CF881308.1|CF881308	scaffold_30:270338-270688	378.057	87.8289	-2.10584	2.20327e-05	yes
estExt_Genemark1.C_220104	estExt_Genemark1.C_220104	estExt_Genemark1.C_220104	scaffold_22:392656-394287	121.463	28.1954	-2.10698	7.30241e-09	yes	26323	IPR016196:MFS general substrate transporter	-	-	-	-
gm1.7892_g	gm1.7892_g	gm1.7892_g	scaffold_28:379029-380006	100.788	23.2714	-2.11469	9.45146e-07	yes	12336	IPR006603:Cystinosin/ERS1p repeat	sp|O60931|CTNS_HUMAN Cystinosin OS=Homo sapiens GN=CTNS PE=1 SV=2:183.341	-	KOG3145:Cystine transporter Cystinosin	-
e_gw1.30.294.1	e_gw1.30.294.1	e_gw1.30.294.1	scaffold_30:215617-217898	29.4207	6.78967	-2.11542	1.20018e-06	yes
e_gw1.1.2919.1	e_gw1.1.2919.1	e_gw1.1.2919.1	scaffold_1:174527-176931	17.3628	4.00113	-2.11752	4.35077e-05	yes	68445	IPR002293:Amino acid/polyamine transporter I;;IPR004841:Amino acid permease-associated region	sp|Q9UT18|YFYA_SCHPO Uncharacterized amino-acid permease C9.10 OS=Schizosaccharomyces pombe (strain ATCC 38366 / 972) GN=SPAC9.10 PE=1 SV=1:531.176	-	KOG1289:Amino acid transporters	amino acid transmembrane transporter activity:GO:0015171;;transport:GO:0006810;;membrane:GO:0016020;;amino acid transport:GO:0006865	20.01.03 C-compound and carbohydrate transport	20.03 transport facilities
gw1.1.1692.1	gw1.1.1692.1	gw1.1.1692.1	scaffold_1:1791266-1791548	135.764	31.0277	-2.12947	0.00154458	yes
estExt_Genewise1Plus.C_300108	estExt_Genewise1Plus.C_300108	estExt_Genewise1Plus.C_300108	scaffold_30:106947-108871	231.837	52.9553	-2.13026	4.55963e-09	yes	104242	IPR001540:Glycoside hydrolase, family 20;;IPR017853:Glycoside hydrolase, catalytic core;;IPR015882:Beta-N-acetylhexosaminidase-like;;IPR015883:Glycoside hydrolase, family 20, catalytic core	sp|Q8WSF3|FDL_DROME Probable beta-hexosaminidase fdl OS=Drosophila melanogaster GN=fdl PE=1 SV=1:225.713	3.2.1.52:Beta-N-acetylhexosaminidase.	KOG2499:Beta-N-acetylhexosaminidase	carbohydrate metabolic process:GO:0005975;;beta-N-acetylhexosaminidase activity:GO:0004563;;beta-N-acetylglucosaminidase activity:GO:0016231	01.05.03 polysaccharide metabolism
estExt_fgenesh2_kg.C_410010	estExt_fgenesh2_kg.C_410010	estExt_fgenesh2_kg.C_410010	scaffold_41:41159-42459	30.817	6.99739	-2.13884	0.00104273	yes	125427	-	sp|P22222|E13B_CELCE Glucan endo-1,3-beta-glucosidase OS=Cellulosimicrobium cellulans PE=1 SV=1:74.3294	-	-	-
estExt_Genewise1Plus.C_380099	estExt_Genewise1Plus.C_380099	estExt_Genewise1Plus.C_380099	scaffold_38:102580-104399	78.1603	17.5574	-2.15436	1.56173e-08	yes	104839	IPR014614:Uncharacterised conserved protein UCP036654;;IPR003953:Fumarate reductase/succinate dehydrogenase flavoprotein, N-terminal	sp|Q7D9A2|Y0809_MYCTU KsdD-like steroid dehydrogenase MT0809 OS=Mycobacterium tuberculosis GN=MT0809 PE=3 SV=1:610.912	1.3.99.1:Succinate dehydrogenase.	KOG2404:Fumarate reductase, flavoprotein subunit	electron transport:GO:0006118;;succinate dehydrogenase activity:GO:0000104;;oxidoreductase activity:GO:0016491
fgenesh1_pg.4_#_221	fgenesh1_pg.4_#_221	fgenesh1_pg.4_#_221	scaffold_4:851480-853338	102.121	22.8733	-2.15855	8.19469e-09	yes	33874	IPR001440:Tetratricopeptide TPR-1;;IPR000270:Octicosapeptide/Phox/Bem1p;;IPR013026:Tetratricopeptide region	sp|O77775|NCF2_BOVIN Neutrophil cytosol factor 2 OS=Bos taurus GN=NCF2 PE=2 SV=1:148.288	-	KOG4225:Sorbin and SH3 domain-containing protein	-	18.02.01 enzymatic activity regulation / enzyme regulator N.crassa
fgenesh1_pg.17_#_137	fgenesh1_pg.17_#_137	fgenesh1_pg.17_#_137	scaffold_17:513791-514598	12.1075	2.69789	-2.166	0.0010629	yes	37461	IPR002196:Glycoside hydrolase, family 24	sp|P11187|LYS_BPPH2 Lysozyme OS=Bacillus phage phi29 GN=15 PE=3 SV=1:82.0333	-	-	cell wall catabolic process:GO:0016998;;peptidoglycan catabolic process:GO:0009253;;lysozyme activity:GO:0003796
estExt_fgenesh1_pm.C_70402	estExt_fgenesh1_pm.C_70402	estExt_fgenesh1_pm.C_70402	scaffold_7:1336720-1338998	48.267	10.6808	-2.17602	8.1585e-08	yes	137069	IPR008162:Inorganic pyrophosphatase	sp|O59714|YBH6_SCHPO Uncharacterized membrane protein C3B8.06 OS=Schizosaccharomyces pombe (strain ATCC 38366 / 972) GN=SPBC3B8.06 PE=1 SV=1:259.996	-	-	phosphate metabolic process:GO:0006796;;cytoplasm:GO:0005737;;magnesium ion binding:GO:0000287;;inorganic diphosphatase activity:GO:0004427
estExt_Genewise1.C_5_t20292	estExt_Genewise1.C_5_t20292	estExt_Genewise1.C_5_t20292	scaffold_5:978722-980745	203.04	44.618	-2.18607	3.74233e-09	yes	109136	IPR003042:Aromatic-ring hydroxylase;;IPR013698:Squalene epoxidase;;IPR006076:FAD dependent oxidoreductase	sp|Q92206|ERG1_CANAL Squalene monooxygenase OS=Candida albicans GN=ERG1 PE=3 SV=1:341.273	1.14.99.7:Squalene monooxygenase.	KOG1298:Squalene monooxygenase	metabolic process:GO:0008152;;squalene monooxygenase activity:GO:0004506;;oxidoreductase activity:GO:0016491	01.06 lipid, fatty acid and isoprenoid metabolism	01.06.06.09 triterpenes metabolism	01.06.06.11 tetracyclic and pentacyclic triterpenes (cholesterin, steroids and hopanoids) metabolism N.crassa	01.20.13 metabolism of derivatives of homoisopentenyl pyrophosphate A.thaliana	20.01.15 electron transport	16.21.05 FAD/FMN binding
fgenesh1_pm.5_#_272	fgenesh1_pm.5_#_272	fgenesh1_pm.5_#_272	scaffold_5:930462-931530	65.0712	14.2416	-2.19191	1.1025e-06	yes	128734	IPR007272:Protein of unknown function DUF395, YeeE/YedE	-	-	-	-
estExt_Genewise1.C_330194	estExt_Genewise1.C_330194	estExt_Genewise1.C_330194	scaffold_33:212851-217715	108.181	23.5144	-2.20183	3.11383e-09	yes	116127	IPR004827:Basic-leucine zipper (bZIP) transcription factor;;IPR003593:AAA+ ATPase, core;;IPR010929:CDR ABC transporter;;IPR013525:ABC-2 type transporter;;IPR003439:ABC transporter-like	sp|O74208|PDH1_CANGA ATP-binding cassette transporter CGR1 OS=Candida glabrata (strain ATCC 2001 / CBS 138 / JCM 3761 / NBRC 0622 / NRRL Y-65) GN=PDH1 PE=3 SV=3:1317.75	-	KOG0065:Pleiotropic drug resistance proteins (PDR1-15), ABC superfamily	regulation of transcription, DNA-dependent:GO:0006355;;nucleus:GO:0005634;;nucleoside-triphosphatase activity:GO:0017111;;integral to membrane:GO:0016021;;ATPase activity, coupled to transmembrane movement of substances:GO:0042626;;transcription factor activity:GO:0003700;;nucleotide binding:GO:0000166;;sequence-specific DNA binding:GO:0043565;;ATP binding:GO:0005524;;transport:GO:0006810;;ATPase…	01.04 phosphate metabolism	01.05 C-compound and carbohydrate metabolism	20.01.01.01 cation transport (H+, Na+, K+, Ca2+ , NH4+, etc.) S.cerevisiae	20.01.03 C-compound and carbohydrate transport	20.01.13 lipid/fatty acid transport	20.01.27 drug/toxin transport	20.09.16.01 Type I protein secretion system (ABC-type transport systems) N.crassa	32.01.01 oxidative stress response	32.05.01.03 chemical agent resistance	32.07 detoxification	32.07.05 detoxification by export	34.01.01.01 homeostasis of metal ions (Na, K, Ca etc.) S.cerevisiae	16.19.03 ATP binding	20.03.22 transport ATPases	20.03.25 ABC transporters
fgenesh1_pg.4_#_259	fgenesh1_pg.4_#_259	fgenesh1_pg.4_#_259	scaffold_4:969166-973591	1222.03	263.673	-2.21245	0.000111995	yes	33912	IPR003593:AAA+ ATPase, core;;IPR011527:ABC transporter, transmembrane region, type 1;;IPR001140:ABC transporter, transmembrane region;;IPR003439:ABC transporter-like	sp|P36619|PMD1_SCHPO Leptomycin B resistance protein pmd1 OS=Schizosaccharomyces pombe (strain ATCC 38366 / 972) GN=pmd1 PE=2 SV=2:296.975;;sp|P36619|PMD1_SCHPO Leptomycin B resistance protein pmd1 OS=Schizosaccharomyces pombe (strain ATCC 38366 / 972) GN=pmd1 PE=2 SV=2:857.055	-	KOG0055:Multidrug/pheromone exporter, ABC superfamily	nucleoside-triphosphatase activity:GO:0017111;;ATP binding:GO:0005524;;integral to membrane:GO:0016021;;ATPase activity:GO:0016887;;transport:GO:0006810;;nucleotide binding:GO:0000166;;ATPase activity, coupled to transmembrane movement of substances:GO:0042626	01.04 phosphate metabolism	20.01.01.01 cation transport (H+, Na+, K+, Ca2+ , NH4+, etc.)	20.01.03 C-compound and carbohydrate transport	20.01.09 peptide transport	20.01.27 drug/toxin transport	20.09.16 cellular export and secretion	20.09.16.01 Type I protein secretion system (ABC-type transport systems) N.crassa	32.05.01 resistance proteins	32.07.05 detoxification by export	34.11.03 chemoperception and response	34.11.03.07 pheromone response, mating-type determination, sex-specific proteins S.cerevisiae	16.19 nucleotide/nucleoside/nucleobase binding	16.19.03 ATP binding	20.03 transport facilities	20.03.22 transport ATPases	20.03.25 ABC transporters
estExt_Genewise1Plus.C_4_t20221	estExt_Genewise1Plus.C_4_t20221	estExt_Genewise1Plus.C_4_t20221	scaffold_4:879656-881158	18.8883	4.0436	-2.22379	3.24528e-05	yes
estExt_fgenesh2_kg.C_70036	estExt_fgenesh2_kg.C_70036	estExt_fgenesh2_kg.C_70036	scaffold_7:276935-278354	472.105	99.5094	-2.2462	3.98519e-08	yes	123006	IPR008551:Protein of unknown function DUF833	sp|Q6ICL3|CV025_HUMAN Uncharacterized protein C22orf25 OS=Homo sapiens GN=C22orf25 PE=2 SV=1:92.8189	-	KOG2342:Uncharacterized conserved protein	-
estExt_Genemark1.C_60015	estExt_Genemark1.C_60015	estExt_Genemark1.C_60015	scaffold_6:47167-48558	66.4395	13.9951	-2.24712	8.74582e-08	yes	24449	IPR000209:Peptidase S8 and S53, subtilisin, kexin, sedolisin;;IPR010259:Proteinase inhibitor I9, subtilisin propeptide;;IPR009020:Proteinase inhibitor, propeptide	sp|Q03420|ALP_TRIAT Alkaline proteinase OS=Trichoderma atroviride GN=prb1 PE=1 SV=1:719.153	3.4.21.-:Serine endopeptidases.	KOG1153:Subtilisin-related protease/Vacuolar protease B	identical protein binding:GO:0042802;;serine-type signal peptidase activity:GO:0008991;;proprotein convertase activity:GO:0016808;;proteolysis:GO:0006508;;negative regulation of catalytic activity:GO:0043086;;pancreatic elastase activity:GO:0008132;;plasminogen activator activity:GO:0008243;;subtilase activity:GO:0004289	14.07.11 protein processing (proteolytic)	14.13 protein/peptide degradation	14.13.04 lysosomal and vacuolar protein degradation S.cerevisiae
estExt_Genemark1.C_350049	estExt_Genemark1.C_350049	estExt_Genemark1.C_350049	scaffold_35:174432-178620	185.358	38.6112	-2.26322	4.09958e-09	yes	26844	IPR014756:Immunoglobulin E-set;;IPR015202:Region of unknown function DUF1929;;IPR011043:Galactose oxidase/kelch, beta-propeller;;IPR009880:Glyoxal oxidase, N-terminal;;IPR002889:Carbohydrate-binding WSC;;IPR013994:Carbohydrate-binding WSC, subgroup	sp|P84675|PFM_CHAGB Putative fungistatic metabolite OS=Chaetomium globosum GN=CHGG_05463 PE=1 SV=2:106.686;;sp|P84675|PFM_CHAGB Putative fungistatic metabolite OS=Chaetomium globosum GN=CHGG_05463 PE=1 SV=2:125.561;;sp|P84675|PFM_CHAGB Putative fungistatic metabolite OS=Chaetomium globosum GN=CHGG_05463 PE=1 SV=2:125.946	-	KOG4157:beta-1,6-N-acetylglucosaminyltransferase, contains WSC domain	-
estExt_Genemark1.C_100031	estExt_Genemark1.C_100031	estExt_Genemark1.C_100031	scaffold_10:95265-100101	247.371	51.0358	-2.27709	3.95734e-08	yes	25104	IPR011050:Pectin lyase fold/virulence factor	sp|P49426|EXG1_COCCA Glucan 1,3-beta-glucosidase OS=Cochliobolus carbonum GN=EXG1 PE=1 SV=1:548.51	-	-	-	01.05.03 polysaccharide metabolism	01.25.01 extracellular polysaccharide degradation N.crassa	32.05.05 virulence, disease factors	32.10.07 degradation / modification of foreign (exogenous) polysaccharides N.crassa	42.27 extracellular / secretion proteins
estExt_Genewise1Plus.C_14_t10223	estExt_Genewise1Plus.C_14_t10223	estExt_Genewise1Plus.C_14_t10223	scaffold_14:272220-273725	182.249	37.5723	-2.27817	1.8892e-10	yes	101064	IPR001092:Basic helix-loop-helix dimerisation region bHLH;;IPR011598:Helix-loop-helix DNA-binding	sp|O43019|SRE2_SCHPO Putative transcription factor sre2 OS=Schizosaccharomyces pombe (strain ATCC 38366 / 972) GN=sre2 PE=1 SV=1:83.9593	-	KOG2588:Predicted DNA-binding protein	nucleus:GO:0005634;;regulation of transcription:GO:0045449;;transcription regulator activity:GO:0030528
e_gw1.33.92.1	e_gw1.33.92.1	e_gw1.33.92.1	scaffold_33:155024-156656	33.947	6.83304	-2.31268	4.12116e-07	yes	91519	IPR000649:Initiation factor 2B related;;IPR015797:NUDIX;;IPR000086:NUDIX hydrolase, core	sp|O58185|EI2BL_PYRHO Putative translation initiation factor eIF-2B subunit 2-like OS=Pyrococcus horikoshii (strain ATCC 700860 / DSM 12428 / JCM 9974 / NBRC 100139 / OT-3) GN=PH0440 PE=1 SV=1:53.9138	-	-	hydrolase activity:GO:0016787;;cellular metabolic process:GO:0044237
fgenesh1_pm.4_#_91	fgenesh1_pm.4_#_91	fgenesh1_pm.4_#_91	scaffold_4:285578-290519	17.9983	3.57531	-2.33172	1.81841e-08	yes	128094	IPR003609:Apple-like;;IPR003014:N/apple PAN;;IPR001189:Manganese and iron superoxide dismutase	-	3.2.1.3:Glucan 1,4-alpha-glucosidase.	KOG4701:Chitinase	glucan 1,4-alpha-glucosidase activity:GO:0004339;;metal ion binding:GO:0046872;;superoxide metabolic process:GO:0006801;;superoxide dismutase activity:GO:0004784
estExt_Genewise1Plus.C_270063	estExt_Genewise1Plus.C_270063	estExt_Genewise1Plus.C_270063	scaffold_27:60170-61237	21.303	4.18411	-2.34806	2.49088e-05	yes	103726	IPR000757:Glycoside hydrolase, family 16;;IPR008985:Concanavalin A-like lectin/glucanase	sp|P23903|E13B_BACCI Glucan endo-1,3-beta-glucosidase A1 OS=Bacillus circulans GN=glcA PE=1 SV=1:95.1301	-	-	hydrolase activity, hydrolyzing O-glycosyl compounds:GO:0004553;;carbohydrate metabolic process:GO:0005975	01.05.03 polysaccharide metabolism	42.01 cell wall
gm1.8617_g	gm1.8617_g	gm1.8617_g	scaffold_40:99283-100240	16.7211	3.27158	-2.35361	0.00019562	yes	13061	-	sp|P76049|YCJY_ECOLI Uncharacterized protein ycjY OS=Escherichia coli (strain K12) GN=ycjY PE=1 SV=2:169.474	-	-	-
estExt_Genewise1Plus.C_13_t10245	estExt_Genewise1Plus.C_13_t10245	estExt_Genewise1Plus.C_13_t10245	scaffold_13:294438-295282	465.668	90.21	-2.36794	4.8816e-11	yes	100746	-	sp|Q9P3B2|AIM38_SCHPO Altered inheritance rate of mitochondria protein 38 homolog OS=Schizosaccharomyces pombe (strain ATCC 38366 / 972) GN=aim38 PE=2 SV=1:100.138	-	-	-
gw1.2.1781.1	gw1.2.1781.1	gw1.2.1781.1	scaffold_2:1979880-1980390	19.1592	3.67118	-2.38372	0.0064358	yes
fgenesh1_pg.11_#_181	fgenesh1_pg.11_#_181	fgenesh1_pg.11_#_181	scaffold_11:693604-694101	188.247	35.2456	-2.41711	5.02393e-06	yes
fgenesh2_kg.22_#_82_#_gi|30115190|gb|CB900532.1|CB900532	fgenesh2_kg.22_#_82_#_gi|30115190|gb|CB900532.1|CB900532	fgenesh2_kg.22_#_82_#_gi|30115190|gb|CB900532.1|CB900532	scaffold_22:464490-465171	5522.41	1029.66	-2.42313	5.45983e-07	yes
estExt_Genewise1Plus.C_8_t20171	estExt_Genewise1Plus.C_8_t20171	estExt_Genewise1Plus.C_8_t20171	scaffold_8:906509-907571	66.4576	12.2366	-2.44124	2.30167e-07	yes
e_gw1.9.807.1	e_gw1.9.807.1	e_gw1.9.807.1	scaffold_9:817176-818208	132.018	23.936	-2.46349	4.59196e-10	yes	80332	IPR001279:Beta-lactamase-like	sp|Q8VPD5|AHLLM_RHIRD N-acyl homoserine lactonase AttM OS=Rhizobium radiobacter GN=attM PE=1 SV=1:59.6918	-	-	hydrolase activity:GO:0016787
fgenesh1_pm.7_#_279	fgenesh1_pm.7_#_279	fgenesh1_pm.7_#_279	scaffold_7:955291-956287	22.0707	3.92339	-2.49196	2.04632e-05	yes	129606	IPR002220:Dihydrodipicolinate synthetase	sp|Q5BD77|HOGA1_EMENI Probable 4-hydroxy-2-oxoglutarate aldolase, mitochondrial OS=Emericella nidulans GN=AN1503 PE=1 SV=1:313.538	-	-	lyase activity:GO:0016829;;metabolic process:GO:0008152	01.01.05.03 metabolism of urea (urea cycle)	01.01.06.06.01 biosynthesis of lysine	01.01.06.06.01.01 diaminopimelic acid pathway
gm1.642_g	gm1.642_g	gm1.642_g	scaffold_1:2333011-2333648	1086.83	191.786	-2.50256	1.22325e-06	yes
gw1.6.494.1	gw1.6.494.1	gw1.6.494.1	scaffold_6:1414486-1414816	102.395	16.494	-2.63414	3.89644e-05	yes
estExt_fgenesh2_kg.C_300021	estExt_fgenesh2_kg.C_300021	estExt_fgenesh2_kg.C_300021	scaffold_30:104244-105410	1913.41	294.373	-2.70043	6.69333e-10	yes	125133	IPR009050:Globin-like	-	-	-	-
e_gw1.4.1160.1	e_gw1.4.1160.1	e_gw1.4.1160.1	scaffold_4:952917-957177	82.1649	11.4133	-2.84781	0	yes	73914	IPR003593:AAA+ ATPase, core;;IPR010929:CDR ABC transporter;;IPR013525:ABC-2 type transporter;;IPR003439:ABC transporter-like	sp|P53756|PDR18_YEAST ABC transporter ATP-binding protein/permease PDR18 OS=Saccharomyces cerevisiae (strain ATCC 204508 / S288c) GN=PDR18 PE=2 SV=1:987.252	-	KOG0065:Pleiotropic drug resistance proteins (PDR1-15), ABC superfamily	nucleoside-triphosphatase activity:GO:0017111;;ATP binding:GO:0005524;;integral to membrane:GO:0016021;;transport:GO:0006810;;ATPase activity:GO:0016887;;ATPase activity, coupled to transmembrane movement of substances:GO:0042626;;nucleotide binding:GO:0000166	01.04 phosphate metabolism	01.05 C-compound and carbohydrate metabolism	20.01.01.01 cation transport (H+, Na+, K+, Ca2+ , NH4+, etc.) S.cerevisiae	20.01.03 C-compound and carbohydrate transport	20.01.13 lipid/fatty acid transport	20.01.27 drug/toxin transport	20.09.16.01 Type I protein secretion system (ABC-type transport systems) N.crassa	32.01.01 oxidative stress response	32.05.01.03 chemical agent resistance	32.07 detoxification	32.07.05 detoxification by export	34.01.01.01 homeostasis of metal ions (Na, K, Ca etc.) S.cerevisiae	16.19.03 ATP binding	20.03.22 transport ATPases	20.03.25 ABC transporters
estExt_Genewise1Plus.C_1_t50475	estExt_Genewise1Plus.C_1_t50475	estExt_Genewise1Plus.C_1_t50475	scaffold_1:3115775-3117807	51.6254	6.22189	-3.05265	1.7639e-13	yes	94877	IPR005197:Glycoside hydrolase, family 71	sp|O13716|AGN1_SCHPO Glucan endo-1,3-alpha-glucosidase agn1 OS=Schizosaccharomyces pombe (strain ATCC 38366 / 972) GN=agn1 PE=1 SV=2:163.696	3.2.1.59:Glucan endo-1,3-alpha-glucosidase.	KOG4297:C-type lectin	glucan endo-1,3-alpha-glucosidase activity:GO:0051118
estExt_Genewise1Plus.C_19_t10325	estExt_Genewise1Plus.C_19_t10325	estExt_Genewise1Plus.C_19_t10325	scaffold_19:419441-420969	513.839	57.7814	-3.15264	0	yes	102433	IPR008333:Oxidoreductase FAD-binding region;;IPR001433:Oxidoreductase FAD/NAD(P)-binding;;IPR009050:Globin-like;;IPR000971:Globin, subset	sp|Q7TTP0|HMP_BORPE Flavohemoprotein OS=Bordetella pertussis GN=hmp PE=3 SV=1:317.775	-	KOG3378:Globins and related hemoproteins	nitric oxide dioxygenase activity:GO:0008941;;electron transport:GO:0006118;;oxidoreductase activity:GO:0016491;;heme binding:GO:0020037;;iron ion binding:GO:0005506	01.02 nitrogen, sulfur and selenium metabolism N.crassa	02.13.01 anaerobic respiration	20.01.15 electron transport	32.01 stress response	32.05.01.03 chemical agent resistance
estExt_fgenesh1_pg.C_90227	estExt_fgenesh1_pg.C_90227	estExt_fgenesh1_pg.C_90227	scaffold_9:883494-884747	57.9989	6.18057	-3.23021	4.02476e-12	yes	141480	IPR012269:Aquaporin;;IPR000425:Major intrinsic protein	sp|P43549|YFF4_YEAST Uncharacterized membrane protein YFL054C OS=Saccharomyces cerevisiae (strain ATCC 204508 / S288c) GN=YFL054C PE=1 SV=1:207.994	-	KOG0224:Aquaporin (major intrinsic protein family)	transporter activity:GO:0005215;;integral to membrane:GO:0016021;;transport:GO:0006810;;membrane:GO:0016020	20.01.03 C-compound and carbohydrate transport	20.09.18 cellular import	20.03.01 channel / pore class transport
estExt_Genewise1Plus.C_7_t20233	estExt_Genewise1Plus.C_7_t20233	estExt_Genewise1Plus.C_7_t20233	scaffold_7:921464-921944	89.0779	7.77973	-3.51728	7.5695e-08	yes
estExt_fgenesh1_pm.C_280122	estExt_fgenesh1_pm.C_280122	estExt_fgenesh1_pm.C_280122	scaffold_28:383528-384230	32.3112	2.75823	-3.55022	3.74233e-09	yes
estExt_Genewise1Plus.C_1_t30019	estExt_Genewise1Plus.C_1_t30019	estExt_Genewise1Plus.C_1_t30019	scaffold_1:1347820-1348929	90.3281	7.70237	-3.5518	0	yes	94189	IPR001314:Peptidase S1A, chymotrypsin;;IPR001254:Peptidase S1 and S6, chymotrypsin/Hap;;IPR009003:Peptidase, trypsin-like serine and cysteine	sp|P35049|TRYP_FUSOX Trypsin OS=Fusarium oxysporum PE=1 SV=1:224.557	3.4.21.4:Trypsin.	KOG3627:Trypsin	serine-type endopeptidase activity:GO:0004252;;trypsin activity:GO:0004295;;catalytic activity:GO:0003824;;proteolysis:GO:0006508	14.07.11 protein processing (proteolytic)	14.13 protein/peptide degradation	14.13.01 cytoplasmic and nuclear protein degradation	20.01.01 ion transport	20.01.01.01 cation transport (H+, Na+, K+, Ca2+ , NH4+, etc.)	20.01.15 electron transport	30.01.05.03 protease mediated signal transduction	30.05 transmembrane signal transduction	34.07 cell adhesion	34.11.12 perception of nutrients and nutritional adaptation	40.01.03.01 regulation of directional cell growth	40.01.05 growth regulators / regulation of cell size &nbsp;	16.01 protein binding	16.05 polysaccharide binding	16.09 lipid binding	16.17 metal binding	16.17.01 calcium binding	16.17.05 sodium binding	16.17.09 heavy metal binding (Cu, Fe, Zn)	18.02.10 regulation of channel activity
e_gw1.19.436.1	e_gw1.19.436.1	e_gw1.19.436.1	scaffold_19:454298-454541	140.264	11.6341	-3.59171	0.000348911	yes
e_gw1.5.334.1	e_gw1.5.334.1	e_gw1.5.334.1	scaffold_5:218064-222476	18.6885	0.783219	-4.57659	0	yes	75459	IPR003593:AAA+ ATPase, core;;IPR010929:CDR ABC transporter;;IPR013525:ABC-2 type transporter;;IPR003439:ABC transporter-like	sp|O74676|CDR4_CANAL ABC transporter CDR4 OS=Candida albicans GN=CDR4 PE=3 SV=1:1482.23	-	KOG0065:Pleiotropic drug resistance proteins (PDR1-15), ABC superfamily	nucleoside-triphosphatase activity:GO:0017111;;ATP binding:GO:0005524;;integral to membrane:GO:0016021;;transport:GO:0006810;;ATPase activity:GO:0016887;;ATPase activity, coupled to transmembrane movement of substances:GO:0042626;;nucleotide binding:GO:0000166	01.04 phosphate metabolism	01.05 C-compound and carbohydrate metabolism	20.01.01.01 cation transport (H+, Na+, K+, Ca2+ , NH4+, etc.) S.cerevisiae	20.01.03 C-compound and carbohydrate transport	20.01.13 lipid/fatty acid transport	20.01.27 drug/toxin transport	20.09.16.01 Type I protein secretion system (ABC-type transport systems) N.crassa	32.01.01 oxidative stress response	32.05.01.03 chemical agent resistance	32.07 detoxification	32.07.05 detoxification by export	34.01.01.01 homeostasis of metal ions (Na, K, Ca etc.) S.cerevisiae	16.19.03 ATP binding	20.03.22 transport ATPases	20.03.25 ABC transporters
