# Supplementary material for: RNA Sequencing Reveals Xyr1 as a Transcription Factor Regulating Gene Expression beyond Carbohydrate Metabolism
Source: Hindawi journal article supplement (doi:10.1155/2016/4841756), 2016-01-01
Supplement: f1 [file 4841756.f1.zip › addition files/Table S5. Rut-30-and-Δxyr1_Glucose-DE.tbl-Funcation.xlsx]

## Sheet: G30-and-G11-DE.tbl-Funcation
Model	gene_id	gene	locus	FPKM_Rut-C30_glucose	FPKM_Δxyr1_glucose	log2(fold_change(Δxyr1_glucose/Rut-C30_glucose))	FDR_value	significant	Protein ID	IPRScan	SPROT	KEGG	KOG	GO	Funcat2
estExt_Genewise1.C_300128	estExt_Genewise1.C_300128	estExt_Genewise1.C_300128	scaffold_30:122505-124706	193.368	2.01516	-6.58431	0	yes	115868	IPR012132:Glucose-methanol-choline oxidoreductase;;IPR007867:Glucose-methanol-choline oxidoreductase, C-terminal;;IPR000172:Glucose-methanol-choline oxidoreductase, N-terminal	sp|P04841|ALOX_PICAN Alcohol oxidase OS=Pichia angusta GN=MOX PE=3 SV=1:452.981	1.1.99.1:Choline dehydrogenase.	KOG1238:Glucose dehydrogenase/choline dehydrogenase/mandelonitrile lyase (GMC oxidoreductase family)	oxidoreductase activity, acting on CH-OH group of donors:GO:0016614;;FAD binding:GO:0050660;;alcohol metabolic process:GO:0006066;;choline dehydrogenase activity:GO:0008812	01.01.09.01.01 biosynthesis of glycine	01.05 C-compound and carbohydrate metabolism	01.20.17.03 metabolism of amines	20.01.15 electron transport	16.21.05 FAD/FMN binding	16.21.07 NAD/NADP binding
e_gw1.7.1067.1	e_gw1.7.1067.1	e_gw1.7.1067.1	scaffold_7:960353-961978	323.878	3.97961	-6.34668	0	yes	77979	IPR001444:Flagellar basal body rod protein;;IPR007114:Major facilitator superfamily;;IPR011701:Major facilitator superfamily MFS-1;;IPR016196:MFS general substrate transporter	sp|Q9US37|YFZ4_SCHPO Uncharacterized transporter C1039.04 OS=Schizosaccharomyces pombe (strain ATCC 38366 / 972) GN=SPAC1039.04 PE=2 SV=1:528.48	-	KOG2533:Permease of the major facilitator superfamily	transporter activity:GO:0005215;;integral to membrane:GO:0016021;;transport:GO:0006810;;flagellin-based flagellum:GO:0009288;;ciliary or flagellar motility:GO:0001539;;structural molecule activity:GO:0005198;;motor activity:GO:0003774	20.01.03 C-compound and carbohydrate transport	20.01.23 allantoin and allantoate transport	20.01.25 vitamine/cofactor transport	20.09.18.07 non-vesicular cellular import	20.03 transport facilities
e_gw1.8.444.1	e_gw1.8.444.1	e_gw1.8.444.1	scaffold_8:1069198-1070357	180.467	2.69912	-6.06311	9.54348e-13	yes	79175	IPR000791:GPR1/FUN34/yaaH	sp|Q24JP1|ALCS_ASPFU Protein alcS OS=Neosartorya fumigata (strain ATCC MYA-4609 / Af293 / CBS 101355 / FGSC A1100) GN=alcS PE=3 SV=1:214.542	-	-	membrane:GO:0016020
estExt_fgenesh1_pg.C_390016	estExt_fgenesh1_pg.C_390016	estExt_fgenesh1_pg.C_390016	scaffold_39:52249-54476	191.046	3.11687	-5.93768	0	yes	143253	IPR000120:Amidase signature enzyme;;IPR015830:Amidase, fungi type	sp|P08158|AMDS_EMENI Acetamidase OS=Emericella nidulans GN=amdS PE=2 SV=1:405.601	3.5.1.4:Amidase.	KOG1212:Amidases	amidase activity:GO:0004040;;carbon-nitrogen ligase activity, with glutamine as amido-N-donor:GO:0016884	01.02 nitrogen, sulfur and selenium metabolism N.crassa
e_gw1.9.136.1	e_gw1.9.136.1	e_gw1.9.136.1	scaffold_9:1061730-1063730	328.886	6.23228	-5.72168	0	yes	79984	IPR005828:General substrate transporter;;IPR007114:Major facilitator superfamily;;IPR003663:Sugar transporter;;IPR016196:MFS general substrate transporter	sp|P07921|LACP_KLULA Lactose permease OS=Kluyveromyces lactis (strain ATCC 8585 / CBS 2359 / DSM 70799 / NBRC 1267 / NRRL Y-1140 / WM37) GN=LAC12 PE=3 SV=1:297.745	5.3.1.4:L-arabinose isomerase.	KOG0254:Predicted transporter (major facilitator superfamily)	sugar:hydrogen symporter activity:GO:0005351;;L-arabinose isomerase activity:GO:0008733;;carbohydrate transport:GO:0008643;;transporter activity:GO:0005215;;integral to membrane:GO:0016021;;transport:GO:0006810;;membrane:GO:0016020	20.01.03 C-compound and carbohydrate transport	20.01.03.01 sugar transport	20.09.18 cellular import	20.09.18.07 non-vesicular cellular import
fgenesh1_pm.7_#_236	fgenesh1_pm.7_#_236	fgenesh1_pm.7_#_236	scaffold_7:790332-792317	24.1833	0.499898	-5.59623	6.66108e-09	yes	129563	IPR002293:Amino acid/polyamine transporter I;;IPR004841:Amino acid permease-associated region	sp|O74543|YCV4_SCHPO Uncharacterized amino-acid permease C777.04 OS=Schizosaccharomyces pombe (strain ATCC 38366 / 972) GN=SPCC777.04 PE=2 SV=1:322.398	-	KOG1286:Amino acid transporters	amino acid transmembrane transporter activity:GO:0015171;;transport:GO:0006810;;membrane:GO:0016020;;amino acid transport:GO:0006865	01.06 lipid, fatty acid and isoprenoid metabolism S.cerevisiae	20.01.07 amino acid/amino acid derivatives transport N.crassa	20.01.13 lipid/fatty acid transport	20.01.25 vitamine/cofactor transport	20.09.04 mitochondrial transport	20.09.18 cellular import	20.09.18.07 non-vesicular cellular import	32.01.03 osmotic and salt stress response	34.11.03.13 osmosensing	20.03 transport facilities
e_gw1.39.21.1	e_gw1.39.21.1	e_gw1.39.21.1	scaffold_39:62813-63610	129.831	2.68606	-5.595	1.02149e-10	yes	92393	IPR016040:NAD(P)-binding;;IPR002347:Glucose/ribitol dehydrogenase;;IPR002198:Short-chain dehydrogenase/reductase SDR	sp|Q9X248|FABG_THEMA 3-oxoacyl-[acyl-carrier-protein] reductase FabG OS=Thermotoga maritima GN=fabG PE=3 SV=1:160.614	1.1.1.125:2-deoxy-D-gluconate 3-dehydrogenase.	KOG0725:Reductases with broad range of substrate specificities	metabolic process:GO:0008152;;catalytic activity:GO:0003824;;binding:GO:0005488;;oxidoreductase activity:GO:0016491;;2-deoxy-D-gluconate 3-dehydrogenase activity:GO:0008678	01.05 C-compound and carbohydrate metabolism	01.05.08.07 C-4 compound catabolism	01.06 lipid, fatty acid and isoprenoid metabolism T.acidophilum	01.06.05 fatty acid metabolism	01.07 metabolism of vitamins, cofactors, and prosthetic groups	01.20.35.01.01 metabolism of melanins	02.07 pentose-phosphate pathway	20.01.15 electron transport	16.21.07 NAD/NADP binding
e_gw1.5.616.1	e_gw1.5.616.1	e_gw1.5.616.1	scaffold_5:106018-106594	52.8423	1.25069	-5.4009	0.000118287	yes	75852	IPR001763:Rhodanese-like	sp|Q06597|ARR2_YEAST Arsenical-resistance protein 2 OS=Saccharomyces cerevisiae (strain ATCC 204508 / S288c) GN=ARR2 PE=1 SV=1:53.1434	-	KOG3772:M-phase inducer phosphatase	-
fgenesh1_pm.7_#_280	fgenesh1_pm.7_#_280	fgenesh1_pm.7_#_280	scaffold_7:956660-957425	1160.44	29.7141	-5.28738	2.97756e-11	yes	129607	IPR006056:YjgF-like protein;;IPR006175:Endoribonuclease L-PSP;;IPR013813:Endoribonuclease L-PSP/chorismate mutase-like	sp|O58584|Y854_PYRHO RutC family protein PH0854 OS=Pyrococcus horikoshii (strain ATCC 700860 / DSM 12428 / JCM 9974 / NBRC 100139 / OT-3) GN=PH0854 PE=1 SV=2:142.895	-	KOG2317:Putative translation initiation inhibitor UK114/IBM1	-	01.01.11.02.01 biosynthesis of isoleucine	01.03.01 purin nucleotide/nucleoside/nucleobase metabolism L.innocua	11.02.03.04 transcriptional control	32.01 stress response	32.01.05 heat shock response	34.11.03.07 pheromone response, mating-type determination, sex-specific proteins N.crassa	42.16 mitochondrion
fgenesh1_pm.2_#_512	fgenesh1_pm.2_#_512	fgenesh1_pm.2_#_512	scaffold_2:1772063-1774896	189.111	5.01123	-5.23792	2.86304e-12	yes	127187	IPR017853:Glycoside hydrolase, catalytic core;;IPR002016:Haem peroxidase, plant/fungal/bacterial;;IPR006102:Glycoside hydrolase family 2, immunoglobulin-like beta-sandwich;;IPR008979:Galactose-binding like	sp|B8NW36|MANBB_ASPFN Probable beta-mannosidase B OS=Aspergillus flavus (strain ATCC 200026 / FGSC A1120 / NRRL 3357 / JCM 12722 / SRRC 167) GN=mndB PE=3 SV=1:804.283	3.2.1.25:Beta-mannosidase.	KOG2230:Predicted beta-mannosidase	hydrolase activity, hydrolyzing O-glycosyl compounds:GO:0004553;;response to oxidative stress:GO:0006979;;carbohydrate metabolic process:GO:0005975;;electron transport:GO:0006118;;peroxidase activity:GO:0004601;;heme binding:GO:0020037;;beta-mannosidase activity:GO:0004567	01.05.03 polysaccharide metabolism
e_gw1.19.84.1	e_gw1.19.84.1	e_gw1.19.84.1	scaffold_19:260013-261687	51.1975	1.40732	-5.18505	5.04468e-10	yes	86271	IPR002293:Amino acid/polyamine transporter I;;IPR004841:Amino acid permease-associated region;;IPR004840:Amino acid permease, conserved site	sp|Q9URZ3|PUT4_SCHPO Probable proline-specific permease put4 OS=Schizosaccharomyces pombe (strain ATCC 38366 / 972) GN=put4 PE=2 SV=1:436.417	-	KOG1286:Amino acid transporters	amino acid transmembrane transporter activity:GO:0015171;;integral to membrane:GO:0016021;;transport:GO:0006810;;membrane:GO:0016020;;amino acid transport:GO:0006865	01.06 lipid, fatty acid and isoprenoid metabolism S.cerevisiae	20.01.01.01.01 heavy metal ion transport (Cu+, Fe3+, etc.) S.cerevisiae	20.01.03 C-compound and carbohydrate transport	20.01.07 amino acid/amino acid derivatives transport N.crassa	20.01.13 lipid/fatty acid transport	20.01.25 vitamine/cofactor transport	20.09.04 mitochondrial transport	20.09.16 cellular export and secretion	20.09.18 cellular import	20.09.18.07 non-vesicular cellular import	32.01.03 osmotic and salt stress response	34.01.01.01 homeostasis of metal ions (Na, K, Ca etc.) S.cerevisiae	34.11.03.13 osmosensing	20.03 transport facilities
estExt_Genewise1Plus.C_11_t20002	estExt_Genewise1Plus.C_11_t20002	estExt_Genewise1Plus.C_11_t20002	scaffold_11:629366-631644	17.6151	0.486077	-5.17949	4.94724e-08	yes	100172	IPR002867:Zinc finger, C6HC-type	sp|Q6T486|RBRA_DICDI Probable E3 ubiquitin-protein ligase rbrA OS=Dictyostelium discoideum GN=rbrA PE=3 SV=1:57.7658	-	KOG1812:Predicted E3 ubiquitin ligase	zinc ion binding:GO:0008270
e_gw1.27.194.1	e_gw1.27.194.1	e_gw1.27.194.1	scaffold_27:22649-24176	145.114	4.15987	-5.1245	3.56687e-11	yes	89683	IPR013891:Protein of unknown function DUF1766	-	-	-	-
e_gw1.12.123.1	e_gw1.12.123.1	e_gw1.12.123.1	scaffold_12:823709-824349	114.221	3.80539	-4.90764	1.23753e-07	yes	82488	IPR008972:Cupredoxin	-	-	-	-
e_gw1.7.478.1	e_gw1.7.478.1	e_gw1.7.478.1	scaffold_7:952197-953981	71.3532	2.68104	-4.73411	5.66318e-09	yes	78553	-	sp|Q9US35|DSD1_SCHPO D-serine dehydratase OS=Schizosaccharomyces pombe (strain ATCC 38366 / 972) GN=SPAC1039.06 PE=2 SV=1:214.927	-	-	-
fgenesh1_pm.4_#_91	fgenesh1_pm.4_#_91	fgenesh1_pm.4_#_91	scaffold_4:285578-290519	19.4578	0.75732	-4.6833	6.23698e-09	yes	128094	IPR003609:Apple-like;;IPR003014:N/apple PAN;;IPR001189:Manganese and iron superoxide dismutase	-	3.2.1.3:Glucan 1,4-alpha-glucosidase.	KOG4701:Chitinase	glucan 1,4-alpha-glucosidase activity:GO:0004339;;metal ion binding:GO:0046872;;superoxide metabolic process:GO:0006801;;superoxide dismutase activity:GO:0004784
fgenesh1_pm.1_#_1019	fgenesh1_pm.1_#_1019	fgenesh1_pm.1_#_1019	scaffold_1:3393493-3395455	34.153	1.35045	-4.6605	7.11697e-08	yes	126605	IPR000873:AMP-dependent synthetase and ligase	sp|Q54P78|4CL2_DICDI Probable 4-coumarate--CoA ligase 2 OS=Dictyostelium discoideum GN=4cl2 PE=3 SV=1:246.128	6.2.1.12:4-coumarate--CoA ligase.	KOG1176:Acyl-CoA synthetase	4-coumarate-CoA ligase activity:GO:0016207;;metabolic process:GO:0008152;;catalytic activity:GO:0003824	01.01.09.04.01 biosynthesis of phenylalanine	01.01.09.04.02 degradation of phenylalanine	01.05 C-compound and carbohydrate metabolism	01.20 secondary metabolism	01.20.35.01 metabolism of phenylpropanoids
e_gw1.3.1244.1	e_gw1.3.1244.1	e_gw1.3.1244.1	scaffold_3:785811-786997	20.0436	0.80053	-4.64604	1.05896e-05	yes	72465	IPR013217:Methyltransferase type 12	-	-	-	-
estExt_Genemark1.C_1_t20455	estExt_Genemark1.C_1_t20455	estExt_Genemark1.C_1_t20455	scaffold_1:3388062-3390134	68.7177	2.88307	-4.575	6.43612e-09	yes	23523	IPR003673:CoA-transferase family III	sp|Q7TNE1|CG010_MOUSE CaiB/baiF CoA-transferase family protein C7orf10 homolog OS=Mus musculus PE=2 SV=1:90.8929	-	KOG3957:Predicted L-carnitine dehydratase/alpha-methylacyl-CoA racemase	metabolic process:GO:0008152;;catalytic activity:GO:0003824
e_gw1.30.209.1	e_gw1.30.209.1	e_gw1.30.209.1	scaffold_30:19326-21006	33.615	1.59693	-4.39573	6.72553e-07	yes	90719	IPR007114:Major facilitator superfamily;;IPR011701:Major facilitator superfamily MFS-1;;IPR016196:MFS general substrate transporter	sp|Q9US44|YIZG_SCHPO Uncharacterized transporter C1002.16c OS=Schizosaccharomyces pombe (strain ATCC 38366 / 972) GN=SPAC1002.16c PE=2 SV=1:217.238	-	KOG2533:Permease of the major facilitator superfamily	transporter activity:GO:0005215;;integral to membrane:GO:0016021;;transport:GO:0006810	20.01.03 C-compound and carbohydrate transport	20.01.23 allantoin and allantoate transport	20.01.25 vitamine/cofactor transport	20.09.18 cellular import	20.09.18.07 non-vesicular cellular import	20.03 transport facilities
gm1.8320_g	gm1.8320_g	gm1.8320_g	scaffold_34:47734-49380	27.3747	1.32964	-4.36374	1.18565e-06	yes	12764	IPR010061:Methylmalonate-semialdehyde dehydrogenase;;IPR016161:Aldehyde/histidinol dehydrogenase;;IPR016160:Aldehyde dehydrogenase, conserved site;;IPR015590:Aldehyde dehydrogenase	sp|Q9EQ20|MMSA_MOUSE Methylmalonate-semialdehyde dehydrogenase [acylating], mitochondrial OS=Mus musculus GN=Aldh6a1 PE=1 SV=1:598.971	1.2.1.27:Methylmalonate-semialdehyde dehydrogenase (acylating).	KOG2449:Methylmalonate semialdehyde dehydrogenase	metabolic process:GO:0008152;;methylmalonate-semialdehyde dehydrogenase (acylating) activity:GO:0004491;;oxidoreductase activity:GO:0016491;;valine metabolic process:GO:0006573	01.01 amino acid metabolism	01.01.11 metabolism of the pyruvate family (alanine, isoleucine, leucine, valine) and D-alanine B.subtilis	01.05 C-compound and carbohydrate metabolism	20.01.15 electron transport	16.21.07 NAD/NADP binding
estExt_fgenesh2_kg.C_1_t10451	estExt_fgenesh2_kg.C_1_t10451	estExt_fgenesh2_kg.C_1_t10451	scaffold_1:3185401-3186746	21.5047	1.07228	-4.3259	2.09717e-05	yes	121828	IPR016040:NAD(P)-binding;;IPR008030:NmrA-like	sp|Q5ZID0|NMRL1_CHICK NmrA-like family domain-containing protein 1 OS=Gallus gallus GN=NMRAL1 PE=2 SV=1:146.747	-	-	metabolic process:GO:0008152;;regulation of nitrogen utilization:GO:0006808;;catalytic activity:GO:0003824;;binding:GO:0005488;;transcription repressor activity:GO:0016564	01.02.07.01 regulation of nitrogen metabolism	11.02.03.04.03 transcription repression
fgenesh1_pm.30_#_34	fgenesh1_pm.30_#_34	fgenesh1_pm.30_#_34	scaffold_30:93001-95341	33.224	1.68562	-4.30088	1.35243e-07	yes	134197	IPR003042:Aromatic-ring hydroxylase	-	-	-	metabolic process:GO:0008152;;oxidoreductase activity:GO:0016491
estExt_fgenesh2_kg.C_190016	estExt_fgenesh2_kg.C_190016	estExt_fgenesh2_kg.C_190016	scaffold_19:86836-87527	58.897	3.02174	-4.28475	6.5578e-06	yes
fgenesh1_pg.30_#_32	fgenesh1_pg.30_#_32	fgenesh1_pg.30_#_32	scaffold_30:89749-91817	86.7646	4.5434	-4.25526	3.67877e-08	yes	39142	IPR011059:Metal-dependent hydrolase, composite;;IPR013108:Amidohydrolase 3;;IPR012855:D-aminoacylase, C-terminal	sp|P72349|NDAD_ALCXX D-aminoacylase OS=Alcaligenes xylosoxydans xylosoxydans GN=dan PE=1 SV=3:226.868	-	KOG2584:Dihydroorotase and related enzymes	zinc ion binding:GO:0008270;;hydrolase activity, acting on carbon-nitrogen (but not peptide) bonds:GO:0016810;;hydrolase activity, acting on carbon-nitrogen (but not peptide) bonds, in linear amides:GO:0016811
fgenesh1_pg.12_#_70	fgenesh1_pg.12_#_70	fgenesh1_pg.12_#_70	scaffold_12:318533-320605	114.385	6.26947	-4.18941	2.7835e-08	yes	36354	IPR012734:Dihydroxyacetone kinase;;IPR004007:Dak phosphatase;;IPR004006:Dak kinase	sp|O13902|DAK1_SCHPO Dihydroxyacetone kinase 1 OS=Schizosaccharomyces pombe (strain ATCC 38366 / 972) GN=dak1 PE=2 SV=1:525.783	2.7.1.29:Glycerone kinase.	KOG2426:Dihydroxyacetone kinase/glycerone kinase	ATP binding:GO:0005524;;glycerol metabolic process:GO:0006071;;glycerone kinase activity:GO:0004371	01.04 phosphate metabolism	01.05 C-compound and carbohydrate metabolism	01.05.07 C-3 compound metabolism	01.06 lipid, fatty acid and isoprenoid metabolism S.cerevisiae	32.01 stress response	16.19 nucleotide/nucleoside/nucleobase binding	16.19.03 ATP binding
e_gw1.14.613.1	e_gw1.14.613.1	e_gw1.14.613.1	scaffold_14:231822-232839	55.1121	3.10605	-4.14922	1.89754e-06	yes	83358	IPR000923:Blue (type 1) copper domain	-	-	KOG2806:Chitinase	electron transport:GO:0006118;;copper ion binding:GO:0005507;;electron carrier activity:GO:0009055
estExt_Genewise1Plus.C_19_t10255	estExt_Genewise1Plus.C_19_t10255	estExt_Genewise1Plus.C_19_t10255	scaffold_19:316765-317896	401.52	22.8386	-4.13593	2.22503e-08	yes	102402	IPR000425:Major intrinsic protein	sp|P47862|AQP3_RAT Aquaporin-3 OS=Rattus norvegicus GN=Aqp3 PE=2 SV=1:105.145	-	KOG0224:Aquaporin (major intrinsic protein family)	transporter activity:GO:0005215;;transport:GO:0006810;;membrane:GO:0016020
e_gw1.20.152.1	e_gw1.20.152.1	e_gw1.20.152.1	scaffold_20:305632-306598	26.1015	1.4997	-4.12138	3.94666e-05	yes	87294	IPR006314:Dyp-type peroxidase	sp|P76536|YFEX_ECOLI Uncharacterized protein yfeX OS=Escherichia coli (strain K12) GN=yfeX PE=3 SV=2:140.969	-	-	-
e_gw1.3.207.1	e_gw1.3.207.1	e_gw1.3.207.1	scaffold_3:1038680-1040435	123.963	7.17219	-4.11136	6.07701e-08	yes	73108	IPR007114:Major facilitator superfamily;;IPR011701:Major facilitator superfamily MFS-1;;IPR016196:MFS general substrate transporter	sp|Q9P6J0|YHDC_SCHPO Uncharacterized transporter C1683.12 OS=Schizosaccharomyces pombe (strain ATCC 38366 / 972) GN=SPBC1683.12 PE=2 SV=1:279.256	-	KOG2533:Permease of the major facilitator superfamily	transporter activity:GO:0005215;;integral to membrane:GO:0016021;;transport:GO:0006810	20.01.03 C-compound and carbohydrate transport	20.01.23 allantoin and allantoate transport	20.01.25 vitamine/cofactor transport	20.09.18 cellular import	20.09.18.07 non-vesicular cellular import	20.03 transport facilities
estExt_Genewise1Plus.C_5_t10307	estExt_Genewise1Plus.C_5_t10307	estExt_Genewise1Plus.C_5_t10307	scaffold_5:355367-357447	39.352	2.31861	-4.0851	5.96459e-07	yes	97308	IPR013027:FAD-dependent pyridine nucleotide-disulphide oxidoreductase;;IPR002938:Monooxygenase, FAD-binding;;IPR001327:Pyridine nucleotide-disulphide oxidoreductase, NAD-binding region;;IPR001100:Pyridine nucleotide-disulphide oxidoreductase, class I	sp|Q9FVQ0|YUC10_ARATH Flavin-containing monooxygenase YUCCA10 OS=Arabidopsis thaliana GN=YUC10 PE=2 SV=1:132.494	-	KOG1399:Flavin-containing monooxygenase	aromatic compound metabolic process:GO:0006725;;FAD binding:GO:0050660;;electron transport:GO:0006118;;monooxygenase activity:GO:0004497;;oxidoreductase activity:GO:0016491
fgenesh1_pm.1_#_964	fgenesh1_pm.1_#_964	fgenesh1_pm.1_#_964	scaffold_1:3241077-3242358	40.7172	2.41224	-4.0772	2.61724e-06	yes	126550	IPR003042:Aromatic-ring hydroxylase;;IPR002938:Monooxygenase, FAD-binding	sp|O81360|ABA2_PRUAR Zeaxanthin epoxidase, chloroplastic OS=Prunus armeniaca PE=2 SV=1:58.5362	-	-	metabolic process:GO:0008152;;aromatic compound metabolic process:GO:0006725;;electron transport:GO:0006118;;oxidoreductase activity:GO:0016491;;monooxygenase activity:GO:0004497
gm1.8551_g	gm1.8551_g	gm1.8551_g	scaffold_39:20464-22831	24.8379	1.49329	-4.05598	6.78998e-06	yes	12995	IPR008313:Uncharacterised conserved protein UCP028846;;IPR008928:Six-hairpin glycosidase-like	sp|Q10449|MU157_SCHPO Meiotically up-regulated gene 157 protein OS=Schizosaccharomyces pombe (strain ATCC 38366 / 972) GN=mug157 PE=1 SV=1:397.127	-	-	catalytic activity:GO:0003824
estExt_Genewise1Plus.C_290266	estExt_Genewise1Plus.C_290266	estExt_Genewise1Plus.C_290266	scaffold_29:366614-368392	143.279	8.92087	-4.00549	8.18733e-08	yes	104193	IPR016137:Regulator of G protein signalling superfamily	-	-	-	-
e_gw1.39.66.1	e_gw1.39.66.1	e_gw1.39.66.1	scaffold_39:63824-65377	71.2666	4.64012	-3.94099	6.54565e-07	yes	92474	IPR016161:Aldehyde/histidinol dehydrogenase;;IPR015590:Aldehyde dehydrogenase	sp|P38067|UGA2_YEAST Succinate-semialdehyde dehydrogenase [NADP+] OS=Saccharomyces cerevisiae (strain ATCC 204508 / S288c) GN=UGA2 PE=1 SV=2:417.927	1.2.1.16:Succinate-semialdehyde dehydrogenase (NAD(P)+).	KOG2451:Aldehyde dehydrogenase	metabolic process:GO:0008152;;oxidoreductase activity:GO:0016491;;succinate-semialdehyde dehydrogenase [NAD(P)+] activity:GO:0009013	01.01 amino acid metabolism	01.01.03.02 metabolism of glutamate	01.01.03.02.02 degradation of glutamate	01.01.05.01.02 degradation of polyamines	01.01.09.04.01 biosynthesis of phenylalanine	01.01.09.05 metabolism of tyrosine	01.01.11 metabolism of the pyruvate family (alanine, isoleucine, leucine, valine) and D-alanine B.subtilis	01.05 C-compound and carbohydrate metabolism	01.05.06.07 C-2 compound and organic acid catabolism S.cerevisiae	01.05.11.07.01 aerobic aromate catabolism	01.06 lipid, fatty acid and isoprenoid metabolism	01.06.06 isoprenoid metabolism	01.07 metabolism of vitamins, cofactors, and prosthetic groups N.crassa	01.07.01 biosynthesis of vitamins, cofactors, and prosthetic groups	01.20 secondary metabolism	01.20.05 metabolism of acetic acid derivatives	01.20.17.01 metabolism of nonprotein amino acids	01.20.29 metabolism of secondary products derived from L-glutamic acid, L-proline and L-ornithine	01.20.31 metabolism of secondary products derived from L-lysine, L-arginine and L-histidine	02.11 electron transport and membrane-associated energy conservation S.cerevisiae	02.13 respiration	02.16 fermentation	02.16.01 alcohol fermentation	02.45 energy conversion and regeneration	20.01.15 electron transport	32.01 stress response	32.01.01 oxidative stress response	32.01.03 osmotic and salt stress response	32.05.01 resistance proteins	32.05.03 defense related proteins	32.07.03 detoxification by modification	32.07.09 detoxification by degradation	42.16 mitochondrion	16.13 C-compound binding	16.21.07 NAD/NADP binding
e_gw1.21.414.1	e_gw1.21.414.1	e_gw1.21.414.1	scaffold_21:560956-561790	86.5752	5.64739	-3.9383	5.26731e-06	yes
fgenesh2_kg.7_#_109_#_gi|30121351|gb|CB906693.1|CB906693	fgenesh2_kg.7_#_109_#_gi|30121351|gb|CB906693.1|CB906693	fgenesh2_kg.7_#_109_#_gi|30121351|gb|CB906693.1|CB906693	scaffold_7:922099-922449	141.285	9.31409	-3.92305	0.000256083	yes
gm1.968_g	gm1.968_g	gm1.968_g	scaffold_1:3425908-3426812	47.592	3.23548	-3.87867	3.55754e-05	yes	5412	IPR016040:NAD(P)-binding;;IPR002347:Glucose/ribitol dehydrogenase;;IPR002198:Short-chain dehydrogenase/reductase SDR	sp|P50202|MAS1_AGRT9 Agropine synthesis reductase OS=Agrobacterium tumefaciens (strain 15955) GN=mas1 PE=3 SV=1:67.3958	1.1.1.100:3-oxoacyl-[acyl-carrier protein] reductase.	KOG1611:Predicted short chain-type dehydrogenase	metabolic process:GO:0008152;;3-oxoacyl-[acyl-carrier-protein] reductase activity:GO:0004316;;catalytic activity:GO:0003824;;binding:GO:0005488;;oxidoreductase activity:GO:0016491	01.05 C-compound and carbohydrate metabolism	16.21.07 NAD/NADP binding
gm1.6288_g	gm1.6288_g	gm1.6288_g	scaffold_17:630588-631718	10.9052	0.750255	-3.8615	0.000685411	yes	10732	IPR016040:NAD(P)-binding;;IPR002347:Glucose/ribitol dehydrogenase;;IPR002198:Short-chain dehydrogenase/reductase SDR	sp|P50166|ARDH_CANTR D-arabinitol 2-dehydrogenase [ribulose-forming] OS=Candida tropicalis GN=ARD PE=1 SV=1:117.087	1.1.1.250:D-arabinitol 2-dehydrogenase.	KOG0725:Reductases with broad range of substrate specificities	metabolic process:GO:0008152;;catalytic activity:GO:0003824;;binding:GO:0005488;;oxidoreductase activity:GO:0016491;;D-arabinitol 2-dehydrogenase activity:GO:0047038	01.05 C-compound and carbohydrate metabolism	01.06 lipid, fatty acid and isoprenoid metabolism L.monocytogenes	01.20.01.05 metabolism of sugar alcohols
estExt_fgenesh1_pg.C_250006	estExt_fgenesh1_pg.C_250006	estExt_fgenesh1_pg.C_250006	scaffold_25:20201-20978	53.0452	3.65419	-3.8596	3.2549e-05	yes
estExt_Genewise1Plus.C_18_t10409	estExt_Genewise1Plus.C_18_t10409	estExt_Genewise1Plus.C_18_t10409	scaffold_18:537556-539854	15.4321	1.0637	-3.85877	0.000685411	yes
fgenesh1_pm.23_#_73	fgenesh1_pm.23_#_73	fgenesh1_pm.23_#_73	scaffold_23:291381-292311	15.0511	1.05409	-3.8358	0.00057602	yes	133312	IPR000772:Ricin B lectin;;IPR008997:Ricin B-related lectin	-	-	-	-
estExt_Genewise1Plus.C_4_t10261	estExt_Genewise1Plus.C_4_t10261	estExt_Genewise1Plus.C_4_t10261	scaffold_4:299843-302486	141.127	9.94046	-3.82754	2.45895e-07	yes	96800	IPR000581:Dihydroxy-acid and 6-phosphogluconate dehydratase;;IPR004404:Dihydroxy-acid dehydratase	sp|Q10318|ILV3_SCHPO Putative dihydroxy-acid dehydratase, mitochondrial OS=Schizosaccharomyces pombe (strain ATCC 38366 / 972) GN=SPAC17G8.06c PE=2 SV=1:651.358	4.2.1.9:Dihydroxy-acid dehydratase.	KOG2448:Dihydroxy-acid dehydratase	dihydroxy-acid dehydratase activity:GO:0004160;;metabolic process:GO:0008152;;catalytic activity:GO:0003824;;branched chain family amino acid biosynthetic process:GO:0009082	01.01 amino acid metabolism	01.01.11.02.01 biosynthesis of isoleucine	01.01.11.03.01 biosynthesis of valine	01.01.11.04.01 biosynthesis of leucine
e_gw1.1.274.1	e_gw1.1.274.1	e_gw1.1.274.1	scaffold_1:3207446-3209486	21.6558	1.53626	-3.81726	1.73797e-05	yes	70134	IPR000873:AMP-dependent synthetase and ligase	sp|O42633|FAT1_COCHE Fatty acid transporter protein OS=Cochliobolus heterostrophus GN=FAT1 PE=3 SV=1:382.874	1.13.12.7:Photinus-luciferin 4-monooxygenase (ATP-hydrolysing).	KOG1179:Very long-chain acyl-CoA synthetase/fatty acid transporter	metabolic process:GO:0008152;;Photinus-luciferin 4-monooxygenase (ATP-hydrolyzing) activity:GO:0047077;;catalytic activity:GO:0003824	01.06 lipid, fatty acid and isoprenoid metabolism N.crassa	01.06.05 fatty acid metabolism	01.06.10 regulation of lipid, fatty acid and isoprenoid metabolism S.cerevisiae	02.25 oxidation of fatty acids	20.01.13 lipid/fatty acid transport	16.13.03 fatty acid binding (e.g. acyl-carrier protein)
e_gw1.20.210.1	e_gw1.20.210.1	e_gw1.20.210.1	scaffold_20:568821-569655	10.9962	0.821709	-3.74223	0.00120736	yes	87225	IPR012337:Polynucleotidyl transferase, Ribonuclease H fold;;IPR006055:Exonuclease	sp|Q5AL29|REXO3_CANAL RNA exonuclease 3 OS=Candida albicans GN=REX3 PE=3 SV=1:73.1738	-	KOG2248:3'-5' exonuclease	nucleic acid binding:GO:0003676;;exonuclease activity:GO:0004527;;intracellular:GO:0005622
e_gw1.6.522.1	e_gw1.6.522.1	e_gw1.6.522.1	scaffold_6:256624-260740	30.3741	2.31736	-3.71228	2.13488e-06	yes	77290	-	-	-	KOG2043:Signaling protein SWIFT and related BRCT domain proteins	-
e_gw1.25.241.1	e_gw1.25.241.1	e_gw1.25.241.1	scaffold_25:374441-376310	32.0202	2.46133	-3.70148	1.36645e-05	yes	89022	IPR001128:Cytochrome P450;;IPR002401:Cytochrome P450, E-class, group I	sp|Q64459|CP3AB_MOUSE Cytochrome P450 3A11 OS=Mus musculus GN=Cyp3a11 PE=1 SV=1:102.064	1.14.14.1:Unspecific monooxygenase.	KOG0158:Cytochrome P450 CYP3/CYP5/CYP6/CYP9 subfamilies	electron transport:GO:0006118;;unspecific monooxygenase activity:GO:0050381;;heme binding:GO:0020037;;monooxygenase activity:GO:0004497;;iron ion binding:GO:0005506	01.05 C-compound and carbohydrate metabolism	01.20 secondary metabolism	20.01.15 electron transport	32.05.05.01 toxins
e_gw1.3.1329.1	e_gw1.3.1329.1	e_gw1.3.1329.1	scaffold_3:791805-792766	242.201	18.9933	-3.67265	2.27491e-06	yes	72278	IPR012336:Thioredoxin-like fold;;IPR004046:Glutathione S-transferase, C-terminal;;IPR010987:Glutathione S-transferase, C-terminal-like;;IPR004045:Glutathione S-transferase, N-terminal	sp|O59827|GST2_SCHPO Glutathione S-transferase 2 OS=Schizosaccharomyces pombe (strain ATCC 38366 / 972) GN=gst2 PE=2 SV=1:147.517	2.5.1.18:Glutathione transferase.	KOG0867:Glutathione S-transferase	glutathione transferase activity:GO:0004364	01.02.07 regulation of nitrogen, sulfur and selenium metabolism N.crassa	01.20 secondary metabolism	01.20.37.01 metabolism of thioredoxin, glutaredoxin, glutathion N.crassa	32.07.07.03 glutathione conjugation reaction
estExt_fgenesh2_kg.C_70188	estExt_fgenesh2_kg.C_70188	estExt_fgenesh2_kg.C_70188	scaffold_7:1191373-1191990	51.125	4.17312	-3.61483	0.000558382	yes
gw1.31.175.1	gw1.31.175.1	gw1.31.175.1	scaffold_31:117868-119336	13.3423	1.103	-3.59651	0.000649022	yes	59187	IPR001464:Annexin	sp|P20073|ANXA7_HUMAN Annexin A7 OS=Homo sapiens GN=ANXA7 PE=1 SV=3:158.688	3.1.4.43:Glycerophosphoinositol inositolphosphodiesterase.	KOG0819:Annexin	glycerophosphoinositol inositolphosphodiesterase activity:GO:0047394;;calcium ion binding:GO:0005509;;calcium-dependent phospholipid binding:GO:0005544	20.09.16 cellular export and secretion	20.09.18.09.01 endocytosis	34.01.01.01 homeostasis of metal ions (Na, K, Ca etc.) N.crassa	16.17.01 calcium binding
fgenesh1_pm.51_#_10	fgenesh1_pm.51_#_10	fgenesh1_pm.51_#_10	scaffold_51:20166-21871	41.3067	3.47859	-3.5698	3.2549e-05	yes	135123	IPR016102:Succinyl-CoA synthetase-like;;IPR005809:Succinyl-CoA synthetase, beta subunit;;IPR011761:ATP-grasp fold;;IPR013650:ATP-grasp fold, succinyl-CoA synthetase-type;;IPR005811:ATP-citrate lyase/succinyl-CoA ligase	sp|Q55AI5|SUCB1_DICDI Succinyl-CoA ligase [ADP-forming] subunit beta, mitochondrial OS=Dictyostelium discoideum GN=scsC PE=3 SV=1:279.256	6.2.1.4:Succinate--CoA ligase (GDP-forming).	KOG2799:Succinyl-CoA synthetase, beta subunit	succinate-CoA ligase complex:GO:0042709;;ATP binding:GO:0005524;;metabolic process:GO:0008152;;succinate-CoA ligase complex (GDP-forming):GO:0045244;;succinate-CoA ligase (GDP-forming) activity:GO:0004776;;catalytic activity:GO:0003824
estExt_Genewise1Plus.C_500041	estExt_Genewise1Plus.C_500041	estExt_Genewise1Plus.C_500041	scaffold_50:44737-46174	129.575	10.9479	-3.56507	2.57592e-06	yes	105247	IPR001518:Argininosuccinate synthase	sp|P22768|ASSY_YEAST Argininosuccinate synthase OS=Saccharomyces cerevisiae (strain ATCC 204508 / S288c) GN=ARG1 PE=1 SV=2:563.533	6.3.4.5:Argininosuccinate synthase.	KOG1706:Argininosuccinate synthase	ATP binding:GO:0005524;;arginine biosynthetic process:GO:0006526;;argininosuccinate synthase activity:GO:0004055	01.01 amino acid metabolism	01.01.03 assimilation of ammonia, metabolism of the glutamate group T.acidophilum	01.01.03.05.01 biosynthesis of arginine	01.01.05 metabolism of urea cycle, creatine and polyamines N.crassa	01.01.05.03 metabolism of urea (urea cycle)	01.01.06.01 metabolism of aspartate	01.02 nitrogen, sulfur and selenium metabolism S.cerevisiae	01.20 secondary metabolism	16.19.03 ATP binding
estExt_fgenesh1_pg.C_3_t10323	estExt_fgenesh1_pg.C_3_t10323	estExt_fgenesh1_pg.C_3_t10323	scaffold_3:1188449-1190916	149.725	12.7594	-3.55268	1.27579e-06	yes	140500	IPR001401:Dynamin, GTPase region	sp|Q6PW23|MX_EPICO Interferon-induced GTP-binding protein Mx OS=Epinephelus coioides GN=mx PE=2 SV=1:151.369	-	KOG0446:Vacuolar sorting protein VPS1, dynamin, and related proteins	GTPase activity:GO:0003924;;GTP binding:GO:0005525;;dynamin GTPase activity:GO:0008549	32.05.01 resistance proteins
fgenesh1_pm.7_#_279	fgenesh1_pm.7_#_279	fgenesh1_pm.7_#_279	scaffold_7:955291-956287	88.9312	7.66926	-3.53553	1.47194e-05	yes	129606	IPR002220:Dihydrodipicolinate synthetase	sp|Q5BD77|HOGA1_EMENI Probable 4-hydroxy-2-oxoglutarate aldolase, mitochondrial OS=Emericella nidulans GN=AN1503 PE=1 SV=1:313.538	-	-	lyase activity:GO:0016829;;metabolic process:GO:0008152	01.01.05.03 metabolism of urea (urea cycle)	01.01.06.06.01 biosynthesis of lysine	01.01.06.06.01.01 diaminopimelic acid pathway
estExt_Genewise1Plus.C_210374	estExt_Genewise1Plus.C_210374	estExt_Genewise1Plus.C_210374	scaffold_21:479708-480822	70.9157	6.18825	-3.5185	1.8401e-05	yes	102903	IPR007466:Peptidyl-arginine deiminase, Porphyromonas-type	sp|Q8GWW7|AGUA_ARATH Agmatine deiminase OS=Arabidopsis thaliana GN=AIH PE=1 SV=2:201.06	-	-	-	01.02.02.09 catabolism of nitrogenous compounds
estExt_fgenesh2_kg.C_250036	estExt_fgenesh2_kg.C_250036	estExt_fgenesh2_kg.C_250036	scaffold_25:222271-222969	15.4344	1.35122	-3.51382	0.00431607	yes
estExt_Genewise1Plus.C_260224	estExt_Genewise1Plus.C_260224	estExt_Genewise1Plus.C_260224	scaffold_26:259869-262582	321.755	28.6011	-3.49182	1.52467e-06	yes	103650	IPR010255:Haem peroxidase;;IPR000763:Catalase-peroxidase haem;;IPR002016:Haem peroxidase, plant/fungal/bacterial	sp|Q2TW34|KATG_ASPOR Catalase-peroxidase OS=Aspergillus oryzae (strain ATCC 42149 / RIB 40) GN=katG PE=3 SV=1:1170.61	1.11.1.11:L-ascorbate peroxidase.	-	L-ascorbate peroxidase activity:GO:0016688;;response to oxidative stress:GO:0006979;;electron transport:GO:0006118;;peroxidase activity:GO:0004601;;heme binding:GO:0020037;;catalase activity:GO:0004096	32.07.07.01 catalase reaction
fgenesh1_pg.31_#_61	fgenesh1_pg.31_#_61	fgenesh1_pg.31_#_61	scaffold_31:196695-198570	18.458	1.66602	-3.46978	0.000146863	yes	39277	IPR017853:Glycoside hydrolase, catalytic core;;IPR000111:Glycoside hydrolase, clan GH-D	sp|Q92451|AGAL3_TRIRE Alpha-galactosidase 3 OS=Trichoderma reesei GN=agl3 PE=1 SV=1:1295.41	-	KOG2366:Alpha-D-galactosidase (melibiase)	hydrolase activity, hydrolyzing O-glycosyl compounds:GO:0004553;;carbohydrate metabolic process:GO:0005975
e_gw1.3.1442.1	e_gw1.3.1442.1	e_gw1.3.1442.1	scaffold_3:704107-705988	25.7502	2.34055	-3.45967	0.000318704	yes
e_gw1.21.284.1	e_gw1.21.284.1	e_gw1.21.284.1	scaffold_21:254239-255622	28.5606	2.60924	-3.45233	0.000129931	yes	87321	IPR002155:Thiolase;;IPR016039:Thiolase-like;;IPR013751:3-Oxoacyl-[acyl-carrier-protein (ACP)] synthase III	sp|Q07598|NLTP_CHICK Non-specific lipid-transfer protein (Fragment) OS=Gallus gallus GN=SCP2 PE=2 SV=1:441.425	2.3.1.16:Acetyl-CoA C-acyltransferase.	KOG1406:Peroxisomal 3-ketoacyl-CoA-thiolase P-44/SCP2	metabolic process:GO:0008152;;catalytic activity:GO:0003824;;acetyl-CoA C-acyltransferase activity:GO:0003988	20.01.13 lipid/fatty acid transport	20.09 transport routes	16.09 lipid binding
estExt_Genemark1.C_3_t10393	estExt_Genemark1.C_3_t10393	estExt_Genemark1.C_3_t10393	scaffold_3:1403205-1404842	40.0502	3.69616	-3.43771	4.26991e-05	yes	24069	IPR008979:Galactose-binding like	-	-	KOG1216:von Willebrand factor and related coagulation proteins	-
estExt_Genewise1Plus.C_10_t10287	estExt_Genewise1Plus.C_10_t10287	estExt_Genewise1Plus.C_10_t10287	scaffold_10:394495-395625	165.861	15.3863	-3.43026	5.54212e-06	yes	99653	IPR007269:Isoprenylcysteine carboxyl methyltransferase	sp|O12947|ICMT_XENLA Protein-S-isoprenylcysteine O-methyltransferase OS=Xenopus laevis GN=icmt PE=2 SV=1:177.178	2.1.1.100:Protein-S isoprenylcysteine O-methyltransferase.	KOG2628:Farnesyl cysteine-carboxyl methyltransferase	integral to membrane:GO:0016021;;protein-S-isoprenylcysteine O-methyltransferase activity:GO:0004671;;C-terminal protein amino acid methylation:GO:0006481	01.05.13.01 S-adenosyl-methionine - homocysteine cycle	01.06 lipid, fatty acid and isoprenoid metabolism N.crassa	14.04 protein targeting, sorting and translocation	14.07.01 modification with fatty acids (e.g. myristylation, palmitylation, farnesylation) N.crassa	14.07.09 posttranslational modification of amino acids (e.g. hydroxylation, methylation)	14.07.11 protein processing (proteolytic)
e_gw1.17.185.1	e_gw1.17.185.1	e_gw1.17.185.1	scaffold_17:628040-629699	32.4279	3.07674	-3.39776	0.000288946	yes	85666	IPR001585:Transaldolase	sp|Q602L8|TAL_METCA Transaldolase OS=Methylococcus capsulatus GN=tal PE=3 SV=1:94.3597	2.2.1.2:Transaldolase.	KOG2772:Transaldolase	carbohydrate metabolic process:GO:0005975;;transaldolase activity:GO:0004801
fgenesh1_pg.9_#_155	fgenesh1_pg.9_#_155	fgenesh1_pg.9_#_155	scaffold_9:636286-637993	17.1453	1.6378	-3.38799	0.00048302	yes	35634	IPR011701:Major facilitator superfamily MFS-1;;IPR016196:MFS general substrate transporter	-	-	KOG0255:Synaptic vesicle transporter SVOP and related transporters (major facilitator superfamily)	-
e_gw1.24.439.1	e_gw1.24.439.1	e_gw1.24.439.1	scaffold_24:6588-7590	28.2049	2.77327	-3.34629	0.000902875	yes
e_gw1.34.98.1	e_gw1.34.98.1	e_gw1.34.98.1	scaffold_34:2115-2567	97.2439	9.58885	-3.34218	0.00431607	yes	91746	IPR013097:Stress responsive alpha-beta barrel;;IPR011008:Dimeric alpha-beta barrel	-	-	-	-
estExt_fgenesh1_pg.C_120071	estExt_fgenesh1_pg.C_120071	estExt_fgenesh1_pg.C_120071	scaffold_12:321229-322434	158.399	15.6461	-3.33969	9.52381e-06	yes	141790	IPR002220:Dihydrodipicolinate synthetase	sp|Q5BD77|HOGA1_EMENI Probable 4-hydroxy-2-oxoglutarate aldolase, mitochondrial OS=Emericella nidulans GN=AN1503 PE=1 SV=1:357.066	4.2.1.52:Dihydrodipicolinate synthase.	-	lyase activity:GO:0016829;;metabolic process:GO:0008152;;dihydrodipicolinate synthase activity:GO:0008840	01.01.05.03 metabolism of urea (urea cycle)	01.01.06.06.01 biosynthesis of lysine	01.01.06.06.01.01 diaminopimelic acid pathway
estExt_Genemark1.C_280018	estExt_Genemark1.C_280018	estExt_Genemark1.C_280018	scaffold_28:68983-69550	438.083	44.3223	-3.3051	0.000117901	yes
estExt_Genewise1Plus.C_19_t10488	estExt_Genewise1Plus.C_19_t10488	estExt_Genewise1Plus.C_19_t10488	scaffold_19:566706-568450	104.627	10.8749	-3.26617	1.74058e-05	yes	102498	IPR016161:Aldehyde/histidinol dehydrogenase;;IPR016160:Aldehyde dehydrogenase, conserved site;;IPR015590:Aldehyde dehydrogenase	sp|P40108|ALDH_DAVTA Aldehyde dehydrogenase OS=Davidiella tassiana GN=CLAH10 PE=1 SV=2:575.474	1.2.1.3:Aldehyde dehydrogenase (NAD+).	KOG2450:Aldehyde dehydrogenase	metabolic process:GO:0008152;;aldehyde dehydrogenase (NAD) activity:GO:0004029;;oxidoreductase activity:GO:0016491
e_gw1.6.1158.1	e_gw1.6.1158.1	e_gw1.6.1158.1	scaffold_6:1349806-1351537	1248.73	132.502	-3.23638	2.08397e-05	yes	76405	IPR016040:NAD(P)-binding;;IPR006140:D-isomer specific 2-hydroxyacid dehydrogenase, NAD-binding;;IPR006139:D-isomer specific 2-hydroxyacid dehydrogenase, catalytic region	sp|Q07103|FDH_NEUCR Formate dehydrogenase OS=Neurospora crassa GN=fdh PE=2 SV=1:630.558	1.2.1.2:Formate dehydrogenase.	KOG0069:Glyoxylate/hydroxypyruvate reductase (D-isomer-specific 2-hydroxy acid dehydrogenase superfamily)	formate dehydrogenase activity:GO:0008863;;oxidoreductase activity, acting on the CH-OH group of donors, NAD or NADP as acceptor:GO:0016616;;metabolic process:GO:0008152;;cofactor binding:GO:0048037;;NAD binding:GO:0051287;;catalytic activity:GO:0003824;;binding:GO:0005488;;formate dehydrogenase complex:GO:0009326	01.05 C-compound and carbohydrate metabolism	01.05.05.07 C-1 compound catabolism	01.07 metabolism of vitamins, cofactors, and prosthetic groups S.cerevisiae	02.16 fermentation
e_gw1.15.119.1	e_gw1.15.119.1	e_gw1.15.119.1	scaffold_15:722578-724310	49.0109	5.20949	-3.23389	8.41377e-05	yes	84399	IPR007114:Major facilitator superfamily;;IPR011701:Major facilitator superfamily MFS-1;;IPR016196:MFS general substrate transporter	sp|O74923|YJ7D_SCHPO Uncharacterized transporter C757.13 OS=Schizosaccharomyces pombe (strain ATCC 38366 / 972) GN=SPCC757.13 PE=2 SV=1:318.161	-	KOG2533:Permease of the major facilitator superfamily	transporter activity:GO:0005215;;integral to membrane:GO:0016021;;transport:GO:0006810
estExt_fgenesh1_pm.C_190177	estExt_fgenesh1_pm.C_190177	estExt_fgenesh1_pm.C_190177	scaffold_19:569288-571762	11.3381	1.20631	-3.2325	0.00102587	yes	138519	IPR005828:General substrate transporter;;IPR007114:Major facilitator superfamily;;IPR003663:Sugar transporter;;IPR016196:MFS general substrate transporter;;IPR005829:Sugar transporter, conserved site	sp|Q4U3U6|QAY_NEUAF Quinate permease OS=Neurospora africana GN=qa-y PE=3 SV=1:270.396	5.3.1.4:L-arabinose isomerase.	KOG0254:Predicted transporter (major facilitator superfamily)	sugar:hydrogen symporter activity:GO:0005351;;L-arabinose isomerase activity:GO:0008733;;carbohydrate transport:GO:0008643;;transporter activity:GO:0005215;;integral to membrane:GO:0016021;;transport:GO:0006810;;membrane:GO:0016020	20.01.03 C-compound and carbohydrate transport	20.09.18.07 non-vesicular cellular import
e_gw1.43.43.1	e_gw1.43.43.1	e_gw1.43.43.1	scaffold_43:55101-56345	105.825	11.387	-3.21622	3.8618e-05	yes	92897	IPR008220:Homoserine acetyltransferase	sp|O27848|METX_METTH Putative homoserine O-acetyltransferase OS=Methanobacterium thermoautotrophicum (strain Delta H) GN=MTH_1820 PE=3 SV=1:90.1225	-	-	cytoplasm:GO:0005737;;O-acetyltransferase activity:GO:0016413
estExt_Genewise1Plus.C_8_t10284	estExt_Genewise1Plus.C_8_t10284	estExt_Genewise1Plus.C_8_t10284	scaffold_8:352575-353918	116.702	12.7741	-3.19154	3.04326e-05	yes	98860	-	-	-	KOG1778:CREB binding protein/P300 and related TAZ Zn-finger proteins	-
fgenesh1_pm.30_#_32	fgenesh1_pm.30_#_32	fgenesh1_pm.30_#_32	scaffold_30:88181-89255	28.9014	3.16945	-3.18883	0.00156963	yes	134195	IPR006913:Glutathione-dependent formaldehyde-activating, GFA	-	-	KOG4192:Uncharacterized conserved protein	metabolic process:GO:0008152;;carbon-sulfur lyase activity:GO:0016846
estExt_fgenesh2_kg.C_30202	estExt_fgenesh2_kg.C_30202	estExt_fgenesh2_kg.C_30202	scaffold_3:1882163-1884078	13.0161	1.44293	-3.17322	0.00141687	yes	122470	IPR001524:Glycoside hydrolase, family 6;;IPR016288:1, 4-beta cellobiohydrolase;;IPR000254:Cellulose-binding region, fungal	sp|P07987|GUX2_TRIRE Exoglucanase 2 OS=Trichoderma reesei GN=cbh2 PE=1 SV=1:959.518	-	-	cellulose binding:GO:0030248;;hydrolase activity, hydrolyzing O-glycosyl compounds:GO:0004553;;carbohydrate metabolic process:GO:0005975;;extracellular region:GO:0005576	01.05 C-compound and carbohydrate metabolism	01.05.02.07 sugar, glucoside, polyol and carboxylate catabolism N.crassa	01.05.03 polysaccharide metabolism
e_gw1.24.267.1	e_gw1.24.267.1	e_gw1.24.267.1	scaffold_24:312697-314396	342.707	38.4668	-3.15529	1.47194e-05	yes	88726	IPR002974:Cytochrome P450, E-class, CYP52;;IPR001128:Cytochrome P450;;IPR002401:Cytochrome P450, E-class, group I	sp|Q9Y757|CP52L_DEBHA Cytochrome P450 52A12 OS=Debaryomyces hansenii (strain ATCC 36239 / CBS 767 / JCM 1990 / NBRC 0083 / IGC 2968) GN=CYP52A12 PE=2 SV=2:374.4	1.14.14.1:Unspecific monooxygenase.	KOG0157:Cytochrome P450 CYP4/CYP19/CYP26 subfamilies	oxidoreductase activity, acting on paired donors, with incorporation or reduction of molecular oxygen, reduced flavin or flavoprotein as one donor, and incorporation of one atom of oxygen:GO:0016712;;electron transport:GO:0006118;;unspecific monooxygenase activity:GO:0050381;;heme binding:GO:0020037;;monooxygenase activity:GO:0004497;;iron ion binding:GO:0005506	01.06 lipid, fatty acid and isoprenoid metabolism N.crassa	01.20.05.03 metabolism of alkanes, alkenes, alkanals, alkanols N.crassa	02.45 energy conversion and regeneration
e_gw1.6.600.1	e_gw1.6.600.1	e_gw1.6.600.1	scaffold_6:253460-255675	19.8542	2.233	-3.15238	0.000504102	yes
fgenesh1_pg.18_#_137	fgenesh1_pg.18_#_137	fgenesh1_pg.18_#_137	scaffold_18:588186-591797	24.599	2.77853	-3.14621	7.57765e-05	yes	37645	-	-	-	KOG3544:Collagens (type IV and type XIII), and related proteins	-
e_gw1.3.989.1	e_gw1.3.989.1	e_gw1.3.989.1	scaffold_3:1634560-1635766	243.963	27.6357	-3.14205	2.7355e-05	yes	72869	IPR007568:RTA1 like protein	sp|C8ZI10|RSB1_YEAS8 Sphingoid long-chain base transporter RSB1 OS=Saccharomyces cerevisiae (strain Lalvin EC1118 / Prise de mousse) GN=RSB1 PE=2 SV=1:115.546	-	-	integral to membrane:GO:0016021;;response to stress:GO:0006950	20.01.13 lipid/fatty acid transport	20.03.22 transport ATPases
estExt_fgenesh1_pg.C_2_t20078	estExt_fgenesh1_pg.C_2_t20078	estExt_fgenesh1_pg.C_2_t20078	scaffold_2:2236897-2238925	23.7071	2.68921	-3.14007	0.000504102	yes	140324	IPR000560:Histidine acid phosphatase	-	-	KOG1869:Splicing coactivator SRm160/300, subunit SRm300	acid phosphatase activity:GO:0003993
estExt_Genemark1.C_100190	estExt_Genemark1.C_100190	estExt_Genemark1.C_100190	scaffold_10:682707-684936	134.806	15.3098	-3.13835	2.31267e-05	yes	25176	IPR001023:Heat shock protein Hsp70;;IPR013126:Heat shock protein 70	sp|Q95YL7|HSP70_ENCHE Mitochondrial-type heat shock protein 70 OS=Encephalitozoon hellem GN=HSP70 PE=3 SV=1:69.3218	-	KOG0101:Molecular chaperones HSP70/HSC70, HSP70 superfamily	ATP binding:GO:0005524	14.01 protein folding and stabilization	32.01 stress response
estExt_Genewise1Plus.C_15_t20071	estExt_Genewise1Plus.C_15_t20071	estExt_Genewise1Plus.C_15_t20071	scaffold_15:742156-743975	30.557	3.49429	-3.12843	0.000255371	yes	101532	IPR005828:General substrate transporter;;IPR007114:Major facilitator superfamily;;IPR003663:Sugar transporter;;IPR016196:MFS general substrate transporter;;IPR005829:Sugar transporter, conserved site	sp|Q4U3U4|QAY_NEUTR Quinate permease OS=Neurospora terricola GN=qa-y PE=3 SV=1:825.469	5.3.1.4:L-arabinose isomerase.	KOG0254:Predicted transporter (major facilitator superfamily)	sugar:hydrogen symporter activity:GO:0005351;;L-arabinose isomerase activity:GO:0008733;;carbohydrate transport:GO:0008643;;transporter activity:GO:0005215;;integral to membrane:GO:0016021;;transport:GO:0006810;;membrane:GO:0016020	20.01.03 C-compound and carbohydrate transport	20.09.18.07 non-vesicular cellular import
gm1.6151_g	gm1.6151_g	gm1.6151_g	scaffold_17:101525-103014	171.901	19.751	-3.12158	3.33491e-05	yes	10595	IPR008949:Terpenoid synthase	sp|Q6WP50|BOT2_BOTFU Presilphiperfolan-8-beta-ol synthase OS=Botryotinia fuckeliana GN=BOT2 PE=1 SV=1:90.8929	-	-	-
estExt_fgenesh2_kg.C_1_t10314	estExt_fgenesh2_kg.C_1_t10314	estExt_fgenesh2_kg.C_1_t10314	scaffold_1:2419850-2420330	75.9197	8.741	-3.1186	0.00207098	yes	121693	IPR002110:Ankyrin	-	-	-	-
estExt_Genewise1.C_9_t20168	estExt_Genewise1.C_9_t20168	estExt_Genewise1.C_9_t20168	scaffold_9:864924-867331	40.2369	4.66129	-3.10972	7.93794e-05	yes	111076	IPR010582:Catalase-related;;IPR002818:ThiJ/PfpI;;IPR011614:Catalase, N-terminal;;IPR002226:Catalase	sp|Q9C168|CAT1_NEUCR Catalase-1 OS=Neurospora crassa GN=cat-1 PE=1 SV=2:1135.55	1.11.1.6:Catalase.	KOG0047:Catalase	response to oxidative stress:GO:0006979;;electron transport:GO:0006118;;heme binding:GO:0020037;;iron ion binding:GO:0005506;;catalase activity:GO:0004096	32.01 stress response	32.01.01 oxidative stress response	32.07.07.01 catalase reaction	16.21.01 heme binding
fgenesh1_pg.1_#_247	fgenesh1_pg.1_#_247	fgenesh1_pg.1_#_247	scaffold_1:959927-960848	26.0982	3.02769	-3.10766	0.00201171	yes
e_gw1.2.353.1	e_gw1.2.353.1	e_gw1.2.353.1	scaffold_2:1885352-1887033	32.5344	3.84676	-3.08025	0.000374612	yes	71426	IPR007114:Major facilitator superfamily;;IPR011701:Major facilitator superfamily MFS-1;;IPR016196:MFS general substrate transporter	sp|Q9USN4|YJA1_SCHPO Uncharacterized transporter C1529.01 OS=Schizosaccharomyces pombe (strain ATCC 38366 / 972) GN=SPCC1529.01 PE=2 SV=2:146.747	-	KOG0255:Synaptic vesicle transporter SVOP and related transporters (major facilitator superfamily)	transporter activity:GO:0005215;;integral to membrane:GO:0016021;;transport:GO:0006810	20.01.27 drug/toxin transport	32.07 detoxification	20.03 transport facilities
fgenesh1_pg.39_#_19	fgenesh1_pg.39_#_19	fgenesh1_pg.39_#_19	scaffold_39:58940-60586	26.3501	3.12621	-3.07533	0.000782287	yes	39653	IPR007114:Major facilitator superfamily;;IPR011701:Major facilitator superfamily MFS-1;;IPR016196:MFS general substrate transporter	sp|O43000|LIZ1_SCHPO Pantothenate transporter liz1 OS=Schizosaccharomyces pombe (strain ATCC 38366 / 972) GN=liz1 PE=2 SV=2:401.749	-	KOG2533:Permease of the major facilitator superfamily	transporter activity:GO:0005215;;integral to membrane:GO:0016021;;transport:GO:0006810	01.02.07 regulation of nitrogen, sulfur and selenium metabolism S.cerevisiae	01.05.25 regulation of C-compound and carbohydrate metabolism S.cerevisiae	01.06.10 regulation of lipid, fatty acid and isoprenoid metabolism S.cerevisiae	10.03.01 mitotic cell cycle and cell cycle control N.crassa	10.03.03 cytokinesis (cell division) /septum formation and hydrolysis N.crassa	20.01.03 C-compound and carbohydrate transport	20.01.25 vitamine/cofactor transport	20.09.18.09.01 endocytosis
estExt_fgenesh1_pg.C_2_t20092	estExt_fgenesh1_pg.C_2_t20092	estExt_fgenesh1_pg.C_2_t20092	scaffold_2:2283207-2285084	275.41	32.6834	-3.07495	2.44888e-05	yes
e_gw1.11.804.1	e_gw1.11.804.1	e_gw1.11.804.1	scaffold_11:91890-93192	218.316	26.3352	-3.05135	4.33624e-05	yes	81893	IPR001395:Aldo/keto reductase;;IPR005399:Potassium channel, voltage-dependent, beta subunit, KCNAB-related	sp|Q40648|KCAB_ORYSJ Probable voltage-gated potassium channel subunit beta OS=Oryza sativa subsp. japonica GN=KOB1 PE=1 SV=2:367.466	1.1.1.91:Aryl-alcohol dehydrogenase (NADP+).	KOG1575:Voltage-gated shaker-like K+ channel, subunit beta/KCNAB	potassium ion transport:GO:0006813;;aryl-alcohol dehydrogenase (NADP+) activity:GO:0047681;;integral to membrane:GO:0016021;;oxidoreductase activity:GO:0016491	01.01 amino acid metabolism	01.01.09.04 metabolism of phenylalanine	01.01.09.05 metabolism of tyrosine	01.05 C-compound and carbohydrate metabolism	01.05.02.07 sugar, glucoside, polyol and carboxylate catabolism B.subtilis	01.06 lipid, fatty acid and isoprenoid metabolism T.acidophilum	01.07.01 biosynthesis of vitamins, cofactors, and prosthetic groups N.crassa	01.20 secondary metabolism	01.20.01.09 metabolism of aminoglycoside antibiotics T.acidophilum	02.01 glycolysis and gluconeogenesis	02.16 fermentation	20.01.01 ion transport	20.01.01.01 cation transport (H+, Na+, K+, Ca2+ , NH4+, etc.)	20.09.18 cellular import	34.01.01 homeostasis of cations	34.01.01.01 homeostasis of metal ions (Na, K, Ca etc.) &nbsp;	16.01 protein binding	16.17.03 potassium binding	16.19.03 ATP binding	16.21.07 NAD/NADP binding	18.02 regulation of protein activity	20.03.01 channel / pore class transport	20.03.01.01 ion channels	20.03.25 ABC transporters
gm1.5569_g	gm1.5569_g	gm1.5569_g	scaffold_14:333524-334346	70.8344	8.60462	-3.04127	0.000513172	yes
estExt_Genewise1Plus.C_10_t20054	estExt_Genewise1Plus.C_10_t20054	estExt_Genewise1Plus.C_10_t20054	scaffold_10:693279-696518	73.2536	8.91736	-3.03821	4.97382e-05	yes	99788	IPR002867:Zinc finger, C6HC-type	sp|Q54CX4|Y5521_DICDI Uncharacterized protein DDB_G0292642 OS=Dictyostelium discoideum GN=DDB_G0292642 PE=4 SV=2:60.8474	-	KOG1815:Predicted E3 ubiquitin ligase	zinc ion binding:GO:0008270
fgenesh1_pm.5_#_272	fgenesh1_pm.5_#_272	fgenesh1_pm.5_#_272	scaffold_5:930462-931530	20.4124	2.57763	-2.98532	0.00411907	yes	128734	IPR007272:Protein of unknown function DUF395, YeeE/YedE	-	-	-	-
estExt_Genewise1Plus.C_8_t10446	estExt_Genewise1Plus.C_8_t10446	estExt_Genewise1Plus.C_8_t10446	scaffold_8:573690-574723	24.8532	3.15701	-2.97681	0.00329611	yes	98934	-	-	-	KOG0977:Nuclear envelope protein lamin, intermediate filament superfamily	-
estExt_Genewise1Plus.C_9_t20053	estExt_Genewise1Plus.C_9_t20053	estExt_Genewise1Plus.C_9_t20053	scaffold_9:727612-729307	165.635	21.2102	-2.96517	6.55262e-05	yes	99422	IPR011024:Gamma-crystallin related;;IPR001171:ERG4/ERG24 ergosterol biosynthesis protein	sp|P38670|ERG24_NEUCR Delta(14)-sterol reductase OS=Neurospora crassa GN=erg-3 PE=3 SV=1:631.328	-	KOG1435:Sterol reductase/lamin B receptor	delta14-sterol reductase activity:GO:0050613;;membrane:GO:0016020	01.06 lipid, fatty acid and isoprenoid metabolism N.crassa	01.06.06.11 tetracyclic and pentacyclic triterpenes (cholesterin, steroids and hopanoids) metabolism S.cerevisiae	16.21.07 NAD/NADP binding
estExt_fgenesh1_pm.C_280105	estExt_fgenesh1_pm.C_280105	estExt_fgenesh1_pm.C_280105	scaffold_28:315518-317456	52.0898	6.70368	-2.95798	0.000288946	yes
estExt_fgenesh1_pm.C_1_t20259	estExt_fgenesh1_pm.C_1_t20259	estExt_fgenesh1_pm.C_1_t20259	scaffold_1:2612718-2614608	99.5154	12.815	-2.95708	9.48447e-05	yes	135570	IPR001128:Cytochrome P450;;IPR002401:Cytochrome P450, E-class, group I	sp|Q00707|STCL_EMENI Probable sterigmatocystin biosynthesis P450 monooxygenase stcL OS=Emericella nidulans GN=stcL PE=3 SV=2:333.569	-	KOG0158:Cytochrome P450 CYP3/CYP5/CYP6/CYP9 subfamilies	electron transport:GO:0006118;;heme binding:GO:0020037;;monooxygenase activity:GO:0004497;;iron ion binding:GO:0005506	01.01.09.04.01 biosynthesis of phenylalanine	01.01.09.04.02 degradation of phenylalanine	01.02 nitrogen, sulfur and selenium metabolism N.crassa	01.06.06.05 sesquiterpenes metabolism	01.20 secondary metabolism	20.01.15 electron transport	32.05.05.01 toxins	32.07.01 detoxification involving cytochrome P450	32.10 degradation / modification of foreign (exogenous) compounds &nbsp;	16.17 metal binding	16.17.09 heavy metal binding (Cu, Fe, Zn)	16.21.01 heme binding
estExt_Genewise1Plus.C_1_t50314	estExt_Genewise1Plus.C_1_t50314	estExt_Genewise1Plus.C_1_t50314	scaffold_1:2952734-2954260	70.553	9.10426	-2.95409	0.000374612	yes	94809	IPR001395:Aldo/keto reductase	sp|Q876L8|XYL1_TRIRE NAD(P)H-dependent D-xylose reductase xyl1 OS=Trichoderma reesei GN=xyl1 PE=3 SV=1:676.011	1.1.1.179:D-xylose 1-dehydrogenase (NADP+).	KOG1577:Aldo/keto reductase family proteins	oxidoreductase activity:GO:0016491;;D-xylose 1-dehydrogenase (NADP+) activity:GO:0047837	01.05 C-compound and carbohydrate metabolism	01.05.02 sugar, glucoside, polyol and carboxylate metabolism	01.05.02.07 sugar, glucoside, polyol and carboxylate catabolism S.cerevisiae	01.05.03 polysaccharide metabolism	01.06 lipid, fatty acid and isoprenoid metabolism	01.06.06 isoprenoid metabolism	01.06.06.11 tetracyclic and pentacyclic triterpenes (cholesterin, steroids and hopanoids) metabolism	01.07 metabolism of vitamins, cofactors, and prosthetic groups	01.20 secondary metabolism	01.20.17.09 metabolism of alkaloids	02.16 fermentation	32.01.03 osmotic and salt stress response	32.01.05 heat shock response	32.10 degradation / modification of foreign (exogenous) compounds	34.11.03.13 osmosensing	16.21.07 NAD/NADP binding
e_gw1.12.51.1	e_gw1.12.51.1	e_gw1.12.51.1	scaffold_12:324397-325285	217.113	28.3221	-2.93845	0.000104454	yes
estExt_Genewise1Plus.C_230296	estExt_Genewise1Plus.C_230296	estExt_Genewise1Plus.C_230296	scaffold_23:419824-423094	140.409	18.7731	-2.9029	7.55753e-05	yes	103267	IPR017805:SAM-dependent methyltransferase, EsaF-type, putative;;IPR005532:Sulphate-modifying factor-like	sp|O94632|MU158_SCHPO Meiotically up-regulated gene 158 protein OS=Schizosaccharomyces pombe (strain ATCC 38366 / 972) GN=mug158 PE=1 SV=4:440.269	-	-	-
e_gw1.19.359.1	e_gw1.19.359.1	e_gw1.19.359.1	scaffold_19:622365-623217	23.7944	3.1857	-2.90094	0.00599682	yes	86425	IPR002204:3-hydroxyisobutyrate dehydrogenase-related, conserved site;;IPR016040:NAD(P)-binding;;IPR008927:6-phosphogluconate dehydrogenase, C-terminal-like;;IPR006115:6-phosphogluconate dehydrogenase, NAD-binding	sp|Q175F8|GLYR1_AEDAE Putative oxidoreductase GLYR1 homolog OS=Aedes aegypti GN=AAEL006684 PE=3 SV=1:138.658	1.1.1.31:3-hydroxyisobutyrate dehydrogenase.	KOG0409:Predicted dehydrogenase	pentose-phosphate shunt:GO:0006098;;valine metabolic process:GO:0006573;;phosphogluconate dehydrogenase (decarboxylating) activity:GO:0004616;;metabolic process:GO:0008152;;catalytic activity:GO:0003824;;oxidoreductase activity:GO:0016491;;binding:GO:0005488;;3-hydroxyisobutyrate dehydrogenase activity:GO:0008442
fgenesh1_pg.6_#_292	fgenesh1_pg.6_#_292	fgenesh1_pg.6_#_292	scaffold_6:1000456-1002169	37.1989	5.07522	-2.87372	0.000677439	yes	34717	IPR007114:Major facilitator superfamily;;IPR011701:Major facilitator superfamily MFS-1;;IPR016196:MFS general substrate transporter	sp|O74923|YJ7D_SCHPO Uncharacterized transporter C757.13 OS=Schizosaccharomyces pombe (strain ATCC 38366 / 972) GN=SPCC757.13 PE=2 SV=1:244.202	-	KOG2533:Permease of the major facilitator superfamily	transporter activity:GO:0005215;;integral to membrane:GO:0016021;;transport:GO:0006810	20.01.23 allantoin and allantoate transport	20.09.18.07 non-vesicular cellular import
estExt_fgenesh1_pg.C_390032	estExt_fgenesh1_pg.C_390032	estExt_fgenesh1_pg.C_390032	scaffold_39:105982-107165	15.3759	2.10579	-2.86824	0.00691993	yes	143256	IPR000425:Major intrinsic protein	sp|P0CD92|AQY1_YEASX Aquaporin-1 OS=Saccharomyces cerevisiae GN=AQY1 PE=2 SV=1:191.045	-	KOG0223:Aquaporin (major intrinsic protein family)	transporter activity:GO:0005215;;transport:GO:0006810;;membrane:GO:0016020	20.09.18.07 non-vesicular cellular import	20.03 transport facilities	20.03.01 channel / pore class transport	20.03.01.01 ion channels
estExt_Genewise1Plus.C_4_t20104	estExt_Genewise1Plus.C_4_t20104	estExt_Genewise1Plus.C_4_t20104	scaffold_4:754618-756711	53.6752	7.43622	-2.85161	0.000315974	yes
fgenesh1_pg.4_#_259	fgenesh1_pg.4_#_259	fgenesh1_pg.4_#_259	scaffold_4:969166-973591	167.751	23.3659	-2.84384	0.000133252	yes	33912	IPR003593:AAA+ ATPase, core;;IPR011527:ABC transporter, transmembrane region, type 1;;IPR001140:ABC transporter, transmembrane region;;IPR003439:ABC transporter-like	sp|P36619|PMD1_SCHPO Leptomycin B resistance protein pmd1 OS=Schizosaccharomyces pombe (strain ATCC 38366 / 972) GN=pmd1 PE=2 SV=2:296.975;;sp|P36619|PMD1_SCHPO Leptomycin B resistance protein pmd1 OS=Schizosaccharomyces pombe (strain ATCC 38366 / 972) GN=pmd1 PE=2 SV=2:857.055	-	KOG0055:Multidrug/pheromone exporter, ABC superfamily	nucleoside-triphosphatase activity:GO:0017111;;ATP binding:GO:0005524;;integral to membrane:GO:0016021;;ATPase activity:GO:0016887;;transport:GO:0006810;;nucleotide binding:GO:0000166;;ATPase activity, coupled to transmembrane movement of substances:GO:0042626	01.04 phosphate metabolism	20.01.01.01 cation transport (H+, Na+, K+, Ca2+ , NH4+, etc.)	20.01.03 C-compound and carbohydrate transport	20.01.09 peptide transport	20.01.27 drug/toxin transport	20.09.16 cellular export and secretion	20.09.16.01 Type I protein secretion system (ABC-type transport systems) N.crassa	32.05.01 resistance proteins	32.07.05 detoxification by export	34.11.03 chemoperception and response	34.11.03.07 pheromone response, mating-type determination, sex-specific proteins S.cerevisiae	16.19 nucleotide/nucleoside/nucleobase binding	16.19.03 ATP binding	20.03 transport facilities	20.03.22 transport ATPases	20.03.25 ABC transporters
estExt_Genemark1.C_220032	estExt_Genemark1.C_220032	estExt_Genemark1.C_220032	scaffold_22:109551-111838	12.7032	1.7875	-2.82918	0.00304089	yes	26281	-	-	-	KOG2510:SWI-SNF chromatin-remodeling complex protein	-
gw1.12.84.1	gw1.12.84.1	gw1.12.84.1	scaffold_12:746044-747040	19.9929	2.81346	-2.82908	0.00881051	yes	42876	IPR004032:PMP-22/EMP/MP20;;IPR000366:Fungal pheromone mating factor STE2 GPCR	-	-	-	mating-type factor pheromone receptor activity:GO:0004932;;membrane:GO:0016020
estExt_fgenesh2_kg.C_40175	estExt_fgenesh2_kg.C_40175	estExt_fgenesh2_kg.C_40175	scaffold_4:1521297-1521756	81.7395	11.5116	-2.82794	0.00611651	yes
estExt_Genewise1Plus.C_1_t60031	estExt_Genewise1Plus.C_1_t60031	estExt_Genewise1Plus.C_1_t60031	scaffold_1:3151873-3153979	50.7129	7.15554	-2.82522	0.00044783	yes	94886	IPR001128:Cytochrome P450;;IPR002401:Cytochrome P450, E-class, group I	sp|Q12612|TRI4_FUSSP Trichodiene oxygenase OS=Fusarium sporotrichioides GN=TRI4 PE=3 SV=1:382.104	1.14.14.1:Unspecific monooxygenase.	KOG0158:Cytochrome P450 CYP3/CYP5/CYP6/CYP9 subfamilies	electron transport:GO:0006118;;unspecific monooxygenase activity:GO:0050381;;heme binding:GO:0020037;;monooxygenase activity:GO:0004497;;iron ion binding:GO:0005506	01.01.09.04.01 biosynthesis of phenylalanine	01.01.09.04.02 degradation of phenylalanine	01.06.06.05 sesquiterpenes metabolism	01.20 secondary metabolism	20.01.15 electron transport	32.05.05.01 toxins	32.07.01 detoxification involving cytochrome P450 N.crassa
fgenesh1_pm.19_#_36	fgenesh1_pm.19_#_36	fgenesh1_pm.19_#_36	scaffold_19:123668-124433	81.3884	11.6945	-2.79899	0.00147015	yes	132574	IPR006388:HAD-superfamily hydrolase, subfamily IA, variant 2;;IPR005834:Haloacid dehalogenase-like hydrolase;;IPR006328:Haloacid dehalogenase, type II;;IPR005833:Haloacid dehydrogenase/epoxide hydrolase	sp|Q59666|HAD_PSEFL (S)-2-haloacid dehalogenase OS=Pseudomonas fluorescens GN=dhl VII PE=3 SV=2:50.8322	-	-	metabolic process:GO:0008152;;hydrolase activity:GO:0016787;;hydrolase activity, acting on acid halide bonds, in C-halide compounds:GO:0019120;;catalytic activity:GO:0003824
estExt_Genewise1.C_6_t10265	estExt_Genewise1.C_6_t10265	estExt_Genewise1.C_6_t10265	scaffold_6:273524-277610	216.396	31.2505	-2.79172	0.000245491	yes	109361	IPR004003:NAD(P) transhydrogenase, beta subunit;;IPR016040:NAD(P)-binding;;IPR008143:Alanine dehydrogenase/pyridine nucleotide transhydrogenase, conserved site-2;;IPR007886:Alanine dehydrogenase/PNT, N-terminal;;IPR007698:Alanine dehydrogenase/PNT, C-terminal;;IPR004571:NAD(P) transhydrogenase, alpha subunit;;IPR008142:Alanine dehydrogenase/pyridine nucleotide transhydrogenase, conserved site-1	sp|P11024|NNTM_BOVIN NAD(P) transhydrogenase, mitochondrial OS=Bos taurus GN=NNT PE=1 SV=3:1075.85	1.6.1.2:NAD(P)(+) transhydrogenase (AB-specific).	-	NAD(P) transhydrogenase activity:GO:0008746;;metabolic process:GO:0008152;;electron transport:GO:0006118;;catalytic activity:GO:0003824;;NAD(P)+ transhydrogenase (AB-specific) activity:GO:0008750;;binding:GO:0005488;;oxidoreductase activity:GO:0016491;;proton transport:GO:0015992	02.11.05 accessory proteins of electron transport and membrane-associated energy conservation N.crassa	02.13 respiration	02.13.03 aerobic respiration	20.01.15 electron transport	32.07.07 oxygen and radical detoxification	20.03.01 channel / pore class transport
estExt_Genewise1Plus.C_2_t40316	estExt_Genewise1Plus.C_2_t40316	estExt_Genewise1Plus.C_2_t40316	scaffold_2:2285110-2286764	39.5091	5.71045	-2.79051	0.000861505	yes	95993	IPR000683:Oxidoreductase, N-terminal;;IPR016040:NAD(P)-binding	sp|P39353|YJHC_ECOLI Uncharacterized oxidoreductase yjhC OS=Escherichia coli (strain K12) GN=yjhC PE=3 SV=2:64.6994	-	KOG2742:Predicted oxidoreductase	metabolic process:GO:0008152;;catalytic activity:GO:0003824;;binding:GO:0005488;;oxidoreductase activity:GO:0016491
estExt_Genewise1Plus.C_390082	estExt_Genewise1Plus.C_390082	estExt_Genewise1Plus.C_390082	scaffold_39:83896-88507	23.2459	3.38085	-2.78152	0.000370221	yes	104881	IPR003593:AAA+ ATPase, core;;IPR010929:CDR ABC transporter;;IPR013525:ABC-2 type transporter;;IPR003439:ABC transporter-like	sp|P41820|BFR1_SCHPO Brefeldin A resistance protein OS=Schizosaccharomyces pombe (strain ATCC 38366 / 972) GN=bfr1 PE=1 SV=1:1140.95	-	KOG0065:Pleiotropic drug resistance proteins (PDR1-15), ABC superfamily	nucleoside-triphosphatase activity:GO:0017111;;ATP binding:GO:0005524;;integral to membrane:GO:0016021;;transport:GO:0006810;;ATPase activity:GO:0016887;;ATPase activity, coupled to transmembrane movement of substances:GO:0042626;;nucleotide binding:GO:0000166	01.04 phosphate metabolism	01.05 C-compound and carbohydrate metabolism	20.01.01.01 cation transport (H+, Na+, K+, Ca2+ , NH4+, etc.) S.cerevisiae	20.01.03 C-compound and carbohydrate transport	20.01.13 lipid/fatty acid transport	20.01.27 drug/toxin transport	20.09.16.01 Type I protein secretion system (ABC-type transport systems) N.crassa	32.01.01 oxidative stress response	32.05.01.03 chemical agent resistance	32.07 detoxification	32.07.05 detoxification by export	34.01.01.01 homeostasis of metal ions (Na, K, Ca etc.) S.cerevisiae	16.19.03 ATP binding	20.03.22 transport ATPases	20.03.25 ABC transporters
fgenesh1_pm.27_#_12	fgenesh1_pm.27_#_12	fgenesh1_pm.27_#_12	scaffold_27:52788-54616	23.8802	3.49266	-2.77342	0.00222548	yes	133808	IPR001138:Fungal transcriptional regulatory protein, N-terminal	sp|P33181|SUC1_CANAL Probable sucrose utilization protein SUC1 OS=Candida albicans GN=SUC1 PE=3 SV=2:135.576	-	-	regulation of transcription, DNA-dependent:GO:0006355;;nucleus:GO:0005634;;zinc ion binding:GO:0008270;;transcription factor activity:GO:0003700
fgenesh1_pm.8_#_141	fgenesh1_pm.8_#_141	fgenesh1_pm.8_#_141	scaffold_8:548482-549714	52.6515	7.73479	-2.76704	0.00168258	yes	129898	IPR016040:NAD(P)-binding;;IPR001509:NAD-dependent epimerase/dehydratase	sp|P53111|ARI1_YEAST NADPH-dependent aldehyde reductase ARI1 OS=Saccharomyces cerevisiae (strain ATCC 204508 / S288c) GN=ARI1 PE=1 SV=1:233.417	1.1.1.195:Cinnamyl-alcohol dehydrogenase.	KOG1502:Flavonol reductase/cinnamoyl-CoA reductase	cinnamyl-alcohol dehydrogenase activity:GO:0045551;;metabolic process:GO:0008152;;coenzyme binding:GO:0050662;;cellular metabolic process:GO:0044237;;catalytic activity:GO:0003824;;binding:GO:0005488	01.05 C-compound and carbohydrate metabolism	01.07 metabolism of vitamins, cofactors, and prosthetic groups S.cerevisiae	01.07.01 biosynthesis of vitamins, cofactors, and prosthetic groups S.cerevisiae	01.20.35.01 metabolism of phenylpropanoids	02.01.01 glycolysis methylglyoxal bypass	32.01.01 oxidative stress response	32.01.03 osmotic and salt stress response	32.01.04 pH stress response	32.01.05 heat shock response	32.07.03 detoxification by modification	42.01 cell wall
gm1.8306_g	gm1.8306_g	gm1.8306_g	scaffold_33:206863-208187	19.5961	2.91826	-2.74739	0.00707806	yes
estExt_Genewise1.C_9_t20272	estExt_Genewise1.C_9_t20272	estExt_Genewise1.C_9_t20272	scaffold_9:1003307-1007021	77.2981	11.514	-2.74705	0.000210833	yes	111122	-	-	-	KOG0825:PHD Zn-finger protein	-
fgenesh1_pg.4_#_233	fgenesh1_pg.4_#_233	fgenesh1_pg.4_#_233	scaffold_4:884997-886379	49.797	7.46645	-2.73756	0.00149879	yes	33886	IPR017853:Glycoside hydrolase, catalytic core;;IPR001223:Glycoside hydrolase, family 18, catalytic domain;;IPR001579:Glycoside hydrolase, chitinase active site;;IPR011583:Chitinase II	sp|Q1E3R8|CHI1_COCIM Endochitinase 1 OS=Coccidioides immitis (strain RS) GN=CTS1 PE=3 SV=1:194.897	3.2.1.14:Chitinase.	KOG2806:Chitinase	endochitinase activity:GO:0008843;;hydrolase activity, hydrolyzing O-glycosyl compounds:GO:0004553;;carbohydrate metabolic process:GO:0005975;;chitin catabolic process:GO:0006032;;chitinase activity:GO:0004568
e_gw1.6.1114.1	e_gw1.6.1114.1	e_gw1.6.1114.1	scaffold_6:1370806-1372059	54.7878	8.25527	-2.73047	0.00141687	yes	76335	IPR016035:Acyl transferase/acyl hydrolase/lysophospholipase;;IPR002641:Patatin	sp|Q8K1N1|PLPL8_MOUSE Calcium-independent phospholipase A2-gamma OS=Mus musculus GN=Pnpla8 PE=2 SV=1:73.1738	-	KOG0513:Ca2+-independent phospholipase A2	metabolic process:GO:0008152;;lipid metabolic process:GO:0006629
estExt_Genewise1.C_330194	estExt_Genewise1.C_330194	estExt_Genewise1.C_330194	scaffold_33:212851-217715	169.549	25.6446	-2.72498	0.000374612	yes	116127	IPR004827:Basic-leucine zipper (bZIP) transcription factor;;IPR003593:AAA+ ATPase, core;;IPR010929:CDR ABC transporter;;IPR013525:ABC-2 type transporter;;IPR003439:ABC transporter-like	sp|O74208|PDH1_CANGA ATP-binding cassette transporter CGR1 OS=Candida glabrata (strain ATCC 2001 / CBS 138 / JCM 3761 / NBRC 0622 / NRRL Y-65) GN=PDH1 PE=3 SV=3:1317.75	-	KOG0065:Pleiotropic drug resistance proteins (PDR1-15), ABC superfamily	regulation of transcription, DNA-dependent:GO:0006355;;nucleus:GO:0005634;;nucleoside-triphosphatase activity:GO:0017111;;integral to membrane:GO:0016021;;ATPase activity, coupled to transmembrane movement of substances:GO:0042626;;transcription factor activity:GO:0003700;;nucleotide binding:GO:0000166;;sequence-specific DNA binding:GO:0043565;;ATP binding:GO:0005524;;transport:GO:0006810;;ATPase…	01.04 phosphate metabolism	01.05 C-compound and carbohydrate metabolism	20.01.01.01 cation transport (H+, Na+, K+, Ca2+ , NH4+, etc.) S.cerevisiae	20.01.03 C-compound and carbohydrate transport	20.01.13 lipid/fatty acid transport	20.01.27 drug/toxin transport	20.09.16.01 Type I protein secretion system (ABC-type transport systems) N.crassa	32.01.01 oxidative stress response	32.05.01.03 chemical agent resistance	32.07 detoxification	32.07.05 detoxification by export	34.01.01.01 homeostasis of metal ions (Na, K, Ca etc.) S.cerevisiae	16.19.03 ATP binding	20.03.22 transport ATPases	20.03.25 ABC transporters
estExt_Genewise1.C_3_t40101	estExt_Genewise1.C_3_t40101	estExt_Genewise1.C_3_t40101	scaffold_3:1864460-1864977	429.578	65.2166	-2.71961	0.00193676	yes
estExt_Genemark1.C_230075	estExt_Genemark1.C_230075	estExt_Genemark1.C_230075	scaffold_23:341786-345020	267.607	40.7924	-2.71374	0.000397976	yes	26373	IPR003864:Protein of unknown function DUF221	sp|Q03516|RSN1_YEAST Uncharacterized protein RSN1 OS=Saccharomyces cerevisiae (strain ATCC 204508 / S288c) GN=RSN1 PE=1 SV=1:536.184	-	KOG1134:Uncharacterized conserved protein	membrane:GO:0016020
gw1.15.44.1	gw1.15.44.1	gw1.15.44.1	scaffold_15:572432-574577	67.5218	10.4196	-2.69605	0.000438743	yes	42804	IPR006693:AB-hydrolase associated lipase region	sp|Q07950|YEH2_YEAST Sterol esterase 2 OS=Saccharomyces cerevisiae (strain ATCC 204508 / S288c) GN=YEH2 PE=1 SV=1:259.61	-	KOG2624:Triglyceride lipase-cholesterol esterase	lipid metabolic process:GO:0006629	01.06 lipid, fatty acid and isoprenoid metabolism N.crassa
estExt_Genewise1Plus.C_2_t30014	estExt_Genewise1Plus.C_2_t30014	estExt_Genewise1Plus.C_2_t30014	scaffold_2:1285639-1288913	47.9801	7.44259	-2.68856	0.00195863	yes	95552	IPR016181:Acyl-CoA N-acyltransferase;;IPR000182:GCN5-related N-acetyltransferase	sp|O59806|YJV8_SCHPO Uncharacterized N-acetyltransferase C550.08 OS=Schizosaccharomyces pombe (strain ATCC 38366 / 972) GN=SPCC550.08 PE=2 SV=1:162.155	-	-	metabolic process:GO:0008152;;N-acetyltransferase activity:GO:0008080
fgenesh2_kg.16_#_3_#_gi|38129840|gb|CF875158.1|CF875158	fgenesh2_kg.16_#_3_#_gi|38129840|gb|CF875158.1|CF875158	fgenesh2_kg.16_#_3_#_gi|38129840|gb|CF875158.1|CF875158	scaffold_16:31069-34076	65.0631	10.1226	-2.68426	0.00936181	yes
gm1.8031_g	gm1.8031_g	gm1.8031_g	scaffold_30:110849-112514	42.0396	6.54361	-2.68359	0.00141687	yes	12475	IPR001764:Glycoside hydrolase, family 3, N-terminal;;IPR002772:Glycoside hydrolase, family 3, C-terminal;;IPR017853:Glycoside hydrolase, catalytic core	sp|P40406|YBBD_BACSU Uncharacterized lipoprotein ybbD OS=Bacillus subtilis GN=ybbD PE=1 SV=1:236.498	3.2.1.21:Beta-glucosidase.	-	hydrolase activity, hydrolyzing O-glycosyl compounds:GO:0004553;;carbohydrate metabolic process:GO:0005975;;beta-glucosidase activity:GO:0008422	01.05.02.07 sugar, glucoside, polyol and carboxylate catabolism B.subtilis
estExt_fgenesh2_kg.C_300009	estExt_fgenesh2_kg.C_300009	estExt_fgenesh2_kg.C_300009	scaffold_30:45338-47357	17.5331	2.73047	-2.68286	0.00454866	yes	125125	IPR001722:Glycoside hydrolase, family 7;;IPR000254:Cellulose-binding region, fungal;;IPR008985:Concanavalin A-like lectin/glucanase	sp|P62694|GUX1_TRIRE Exoglucanase 1 OS=Trichoderma reesei GN=cbh1 PE=1 SV=1:991.875	-	KOG4562:Uncharacterized conserved protein (tumor-rejection antigen MAGE in humans)	cellulose binding:GO:0030248;;hydrolase activity, hydrolyzing O-glycosyl compounds:GO:0004553;;carbohydrate metabolic process:GO:0005975;;extracellular region:GO:0005576	01.05.03 polysaccharide metabolism
estExt_Genewise1.C_1_t50415	estExt_Genewise1.C_1_t50415	estExt_Genewise1.C_1_t50415	scaffold_1:3046704-3047988	62.1634	9.69517	-2.68073	0.00149879	yes	106452	IPR011333:BTB/POZ fold;;IPR000210:BTB/POZ-like;;IPR013069:BTB/POZ	-	-	-	protein binding:GO:0005515
estExt_Genewise1Plus.C_19_t10415	estExt_Genewise1Plus.C_19_t10415	estExt_Genewise1Plus.C_19_t10415	scaffold_19:497791-499362	33.8387	5.36706	-2.65647	0.00362402	yes
e_gw1.3.1655.1	e_gw1.3.1655.1	e_gw1.3.1655.1	scaffold_3:1411920-1412961	69.0967	10.9855	-2.65301	0.00168258	yes	73249	IPR016040:NAD(P)-binding;;IPR006140:D-isomer specific 2-hydroxyacid dehydrogenase, NAD-binding;;IPR006139:D-isomer specific 2-hydroxyacid dehydrogenase, catalytic region	sp|P52643|LDHD_ECOLI D-lactate dehydrogenase OS=Escherichia coli (strain K12) GN=ldhA PE=1 SV=1:354.369	1.1.1.28:D-lactate dehydrogenase.	KOG0068:D-3-phosphoglycerate dehydrogenase, D-isomer-specific 2-hydroxy acid dehydrogenase superfamily	oxidoreductase activity, acting on the CH-OH group of donors, NAD or NADP as acceptor:GO:0016616;;metabolic process:GO:0008152;;cofactor binding:GO:0048037;;NAD binding:GO:0051287;;D-lactate dehydrogenase activity:GO:0008720;;catalytic activity:GO:0003824;;binding:GO:0005488	02.45 energy conversion and regeneration
estExt_Genewise1.C_1_t20498	estExt_Genewise1.C_1_t20498	estExt_Genewise1.C_1_t20498	scaffold_1:1313685-1314839	54.1402	8.62793	-2.64961	0.00414105	yes
gm1.70_g	gm1.70_g	gm1.70_g	scaffold_1:251341-253645	51.4077	8.28925	-2.63267	0.000782287	yes	4514	-	-	3.2.1.18:Exo-alpha-sialidase.	KOG3599:Ca2+-modulated nonselective cation channel polycystin	exo-alpha-sialidase activity:GO:0004308
gm1.6389_g	gm1.6389_g	gm1.6389_g	scaffold_18:247524-248474	72.5652	11.7246	-2.62974	0.00256719	yes	10833	IPR016040:NAD(P)-binding;;IPR002347:Glucose/ribitol dehydrogenase;;IPR002198:Short-chain dehydrogenase/reductase SDR	sp|Q9RPT1|RHLG_PSEAE Rhamnolipids biosynthesis 3-oxoacyl-[acyl-carrier-protein] reductase OS=Pseudomonas aeruginosa GN=rhlG PE=1 SV=1:179.104	1.1.1.100:3-oxoacyl-[acyl-carrier protein] reductase.	KOG0725:Reductases with broad range of substrate specificities	metabolic process:GO:0008152;;3-oxoacyl-[acyl-carrier-protein] reductase activity:GO:0004316;;catalytic activity:GO:0003824;;binding:GO:0005488;;oxidoreductase activity:GO:0016491	01.05 C-compound and carbohydrate metabolism	01.06.02.02 glycolipid metabolism	01.06.05 fatty acid metabolism	01.20.01.05 metabolism of sugar alcohols	01.20.35.01.01 metabolism of melanins
gw1.21.443.1	gw1.21.443.1	gw1.21.443.1	scaffold_21:505074-507047	20.1218	3.26951	-2.62162	0.0057543	yes	66301	IPR007114:Major facilitator superfamily;;IPR011701:Major facilitator superfamily MFS-1;;IPR016196:MFS general substrate transporter	sp|Q04301|VBA1_YEAST Vacuolar basic amino acid transporter 1 OS=Saccharomyces cerevisiae (strain ATCC 204508 / S288c) GN=VBA1 PE=1 SV=1:109.768	-	KOG0254:Predicted transporter (major facilitator superfamily)	transporter activity:GO:0005215;;integral to membrane:GO:0016021;;transport:GO:0006810
estExt_Genewise1Plus.C_19_t10169	estExt_Genewise1Plus.C_19_t10169	estExt_Genewise1Plus.C_19_t10169	scaffold_19:229189-231333	64.7019	10.5179	-2.62096	0.000703819	yes	102372	IPR008928:Six-hairpin glycosidase-like;;IPR001661:Glycoside hydrolase, family 37	sp|Q54QZ5|TREA_DICDI Trehalase OS=Dictyostelium discoideum GN=treh PE=3 SV=1:355.14	3.2.1.28:Alpha,alpha-trehalase.	KOG0602:Neutral trehalase	alpha,alpha-trehalase activity:GO:0004555;;catalytic activity:GO:0003824;;trehalose metabolic process:GO:0005991	01.05 C-compound and carbohydrate metabolism	01.05.02.07 sugar, glucoside, polyol and carboxylate catabolism	02.19 metabolism of energy reserves (e.g. glycogen, trehalose) N.crassa	16.09 lipid binding
fgenesh1_pm.7_#_46	fgenesh1_pm.7_#_46	fgenesh1_pm.7_#_46	scaffold_7:143831-146154	122.417	20.1615	-2.60213	0.000490969	yes	129373	IPR005829:Sugar transporter, conserved site;;IPR002035:von Willebrand factor, type A	sp|Q9GLY5|ITIH3_RABIT Inter-alpha-trypsin inhibitor heavy chain H3 OS=Oryctolagus cuniculus GN=ITIH3 PE=2 SV=1:69.3218	-	-	transporter activity:GO:0005215;;transport:GO:0006810;;membrane:GO:0016020
e_gw1.8.493.1	e_gw1.8.493.1	e_gw1.8.493.1	scaffold_8:555544-556667	82.4207	13.6071	-2.59864	0.00216721	yes	79323	IPR016040:NAD(P)-binding;;IPR002347:Glucose/ribitol dehydrogenase;;IPR002198:Short-chain dehydrogenase/reductase SDR	sp|Q9X248|FABG_THEMA 3-oxoacyl-[acyl-carrier-protein] reductase FabG OS=Thermotoga maritima GN=fabG PE=3 SV=1:169.088	1.1.1.100:3-oxoacyl-[acyl-carrier protein] reductase.	KOG0725:Reductases with broad range of substrate specificities	metabolic process:GO:0008152;;3-oxoacyl-[acyl-carrier-protein] reductase activity:GO:0004316;;catalytic activity:GO:0003824;;binding:GO:0005488;;oxidoreductase activity:GO:0016491	01.05 C-compound and carbohydrate metabolism	01.20 secondary metabolism
estExt_Genewise1Plus.C_1_t50056	estExt_Genewise1Plus.C_1_t50056	estExt_Genewise1Plus.C_1_t50056	scaffold_1:2610188-2611900	94.1273	15.6262	-2.59064	0.000974413	yes
e_gw1.1.1058.1	e_gw1.1.1058.1	e_gw1.1.1058.1	scaffold_1:2178088-2178809	527.307	88.2531	-2.57892	0.000705538	yes	68976	-	sp|Q5AW46|Y7484_EMENI Uncharacterized protein AN7484 OS=Emericella nidulans GN=AN7484 PE=1 SV=1:115.931	-	-	-
fgenesh1_pm.13_#_78	fgenesh1_pm.13_#_78	fgenesh1_pm.13_#_78	scaffold_13:267176-269672	37.7709	6.34221	-2.57422	0.00141687	yes	131271	IPR003593:AAA+ ATPase, core;;IPR003959:AAA ATPase, core;;IPR016084:Haem oxygenase-like, multi-helical	sp|Q5T9A4|ATD3B_HUMAN ATPase family AAA domain-containing protein 3B OS=Homo sapiens GN=ATAD3B PE=1 SV=1:74.7146	-	KOG0742:AAA+-type ATPase	ATP binding:GO:0005524;;nucleoside-triphosphatase activity:GO:0017111;;nucleotide binding:GO:0000166
e_gw1.2.1460.1	e_gw1.2.1460.1	e_gw1.2.1460.1	scaffold_2:2180729-2181323	90.1873	15.3135	-2.55812	0.00658526	yes
fgenesh1_pg.13_#_208	fgenesh1_pg.13_#_208	fgenesh1_pg.13_#_208	scaffold_13:805175-806674	58.3645	10.0579	-2.53677	0.00222548	yes	36708	IPR000073:Alpha/beta hydrolase fold-1;;IPR010497:Epoxide hydrolase, N-terminal;;IPR000639:Epoxide hydrolase-like	sp|Q06816|HYEP_STIAD Putative epoxide hydrolase OS=Stigmatella aurantiaca (strain DW4/3-1) GN=STAUR_4299 PE=3 SV=2:185.267	-	KOG2565:Predicted hydrolases or acyltransferases (alpha/beta hydrolase superfamily)	epoxide hydrolase activity:GO:0004301;;response to toxin:GO:0009636;;microsome:GO:0005792;;catalytic activity:GO:0003824;;cis-stilbene-oxide hydrolase activity:GO:0033961;;membrane:GO:0016020
estExt_fgenesh1_pm.C_40040	estExt_fgenesh1_pm.C_40040	estExt_fgenesh1_pm.C_40040	scaffold_4:122367-123752	33.4587	5.77137	-2.5354	0.00738159	yes	136351	IPR001585:Transaldolase	sp|B2J2D9|TAL_NOSP7 Transaldolase OS=Nostoc punctiforme (strain ATCC 29133 / PCC 73102) GN=tal PE=3 SV=1:100.138	2.2.1.2:Transaldolase.	KOG2772:Transaldolase	carbohydrate metabolic process:GO:0005975;;transaldolase activity:GO:0004801
estExt_Genemark1.C_50315	estExt_Genemark1.C_50315	estExt_Genemark1.C_50315	scaffold_5:1261850-1263869	66.0849	11.4596	-2.52776	0.00156963	yes	24422	IPR007114:Major facilitator superfamily;;IPR011701:Major facilitator superfamily MFS-1;;IPR016196:MFS general substrate transporter	sp|Q9US44|YIZG_SCHPO Uncharacterized transporter C1002.16c OS=Schizosaccharomyces pombe (strain ATCC 38366 / 972) GN=SPAC1002.16c PE=2 SV=1:305.064	-	KOG2533:Permease of the major facilitator superfamily	transporter activity:GO:0005215;;integral to membrane:GO:0016021;;transport:GO:0006810	20.01.03 C-compound and carbohydrate transport	20.01.23 allantoin and allantoate transport	20.01.25 vitamine/cofactor transport	20.09.18 cellular import	20.09.18.07 non-vesicular cellular import	20.03 transport facilities
fgenesh1_pg.1_#_696	fgenesh1_pg.1_#_696	fgenesh1_pg.1_#_696	scaffold_1:2693182-2694525	67.417	11.7056	-2.52591	0.00210883	yes	32207	IPR006026:Peptidase, metallopeptidases;;IPR006025:Peptidase M, neutral zinc metallopeptidases, zinc-binding site;;IPR001818:Peptidase M10A and M12B, matrixin and adamalysin	-	-	-	metallopeptidase activity:GO:0008237;;zinc ion binding:GO:0008270;;proteinaceous extracellular matrix:GO:0005578;;proteolysis:GO:0006508;;metalloendopeptidase activity:GO:0004222
gw1.17.339.1	gw1.17.339.1	gw1.17.339.1	scaffold_17:658707-659900	420.371	73.1768	-2.52221	0.000733099	yes	55923	-	-	-	KOG0439:VAMP-associated protein involved in inositol metabolism	-
estExt_Genemark1.C_270124	estExt_Genemark1.C_270124	estExt_Genemark1.C_270124	scaffold_27:420086-421733	124.627	21.7544	-2.51824	0.00147015	yes	26591	IPR000420:Yeast PIR protein repeat	sp|A6ZQH4|CIS3_YEAS7 Cell wall mannoprotein CIS3 OS=Saccharomyces cerevisiae (strain YJM789) GN=CIS3 PE=3 SV=1:104.375	-	KOG1216:von Willebrand factor and related coagulation proteins	-	42.01 cell wall
estExt_Genewise1Plus.C_19_t10485	estExt_Genewise1Plus.C_19_t10485	estExt_Genewise1Plus.C_19_t10485	scaffold_19:563955-566095	55.7661	9.77372	-2.51241	0.00163979	yes	102495	IPR000120:Amidase signature enzyme;;IPR015830:Amidase, fungi type	sp|O59805|YJV7_SCHPO Putative amidase C550.07 OS=Schizosaccharomyces pombe (strain ATCC 38366 / 972) GN=SPCC550.07 PE=2 SV=1:427.943	3.5.1.4:Amidase.	KOG1212:Amidases	amidase activity:GO:0004040;;carbon-nitrogen ligase activity, with glutamine as amido-N-donor:GO:0016884	01.05 C-compound and carbohydrate metabolism	01.05.06.07 C-2 compound and organic acid catabolism S.cerevisiae	02.11 electron transport and membrane-associated energy conservation S.cerevisiae	02.16 fermentation	32.05.03 defense related proteins	42.16 mitochondrion
gw1.3.263.1	gw1.3.263.1	gw1.3.263.1	scaffold_3:1177298-1177790	155.659	27.4142	-2.5054	0.00603052	yes
e_gw1.16.135.1	e_gw1.16.135.1	e_gw1.16.135.1	scaffold_16:14458-16184	21.7378	3.86574	-2.49139	0.00846683	yes	84853	IPR007114:Major facilitator superfamily;;IPR011701:Major facilitator superfamily MFS-1;;IPR016196:MFS general substrate transporter	sp|Q9P6J7|YHD3_SCHPO Uncharacterized MFS-type transporter C1683.03c OS=Schizosaccharomyces pombe (strain ATCC 38366 / 972) GN=SPBC1683.03c PE=2 SV=1:205.682	-	KOG0254:Predicted transporter (major facilitator superfamily)	transporter activity:GO:0005215;;integral to membrane:GO:0016021;;transport:GO:0006810	20.01.27 drug/toxin transport	32.07 detoxification
e_gw1.4.150.1	e_gw1.4.150.1	e_gw1.4.150.1	scaffold_4:103856-105707	22.6524	4.11785	-2.4597	0.00738159	yes
e_gw1.49.58.1	e_gw1.49.58.1	e_gw1.49.58.1	scaffold_49:21890-23712	21.5185	3.96178	-2.44136	0.00951051	yes	93273	IPR012132:Glucose-methanol-choline oxidoreductase;;IPR007867:Glucose-methanol-choline oxidoreductase, C-terminal;;IPR000172:Glucose-methanol-choline oxidoreductase, N-terminal	sp|Q8BJ64|CHDH_MOUSE Choline dehydrogenase, mitochondrial OS=Mus musculus GN=Chdh PE=1 SV=1:218.779	1.1.99.1:Choline dehydrogenase.	KOG1238:Glucose dehydrogenase/choline dehydrogenase/mandelonitrile lyase (GMC oxidoreductase family)	oxidoreductase activity, acting on CH-OH group of donors:GO:0016614;;FAD binding:GO:0050660;;alcohol metabolic process:GO:0006066;;choline dehydrogenase activity:GO:0008812	01.01.09.01.01 biosynthesis of glycine	01.05 C-compound and carbohydrate metabolism	01.20.17.03 metabolism of amines	20.01.15 electron transport	16.21.05 FAD/FMN binding	16.21.07 NAD/NADP binding
e_gw1.4.1160.1	e_gw1.4.1160.1	e_gw1.4.1160.1	scaffold_4:952917-957177	16.324	3.00738	-2.44041	0.00349762	yes	73914	IPR003593:AAA+ ATPase, core;;IPR010929:CDR ABC transporter;;IPR013525:ABC-2 type transporter;;IPR003439:ABC transporter-like	sp|P53756|PDR18_YEAST ABC transporter ATP-binding protein/permease PDR18 OS=Saccharomyces cerevisiae (strain ATCC 204508 / S288c) GN=PDR18 PE=2 SV=1:987.252	-	KOG0065:Pleiotropic drug resistance proteins (PDR1-15), ABC superfamily	nucleoside-triphosphatase activity:GO:0017111;;ATP binding:GO:0005524;;integral to membrane:GO:0016021;;transport:GO:0006810;;ATPase activity:GO:0016887;;ATPase activity, coupled to transmembrane movement of substances:GO:0042626;;nucleotide binding:GO:0000166	01.04 phosphate metabolism	01.05 C-compound and carbohydrate metabolism	20.01.01.01 cation transport (H+, Na+, K+, Ca2+ , NH4+, etc.) S.cerevisiae	20.01.03 C-compound and carbohydrate transport	20.01.13 lipid/fatty acid transport	20.01.27 drug/toxin transport	20.09.16.01 Type I protein secretion system (ABC-type transport systems) N.crassa	32.01.01 oxidative stress response	32.05.01.03 chemical agent resistance	32.07 detoxification	32.07.05 detoxification by export	34.01.01.01 homeostasis of metal ions (Na, K, Ca etc.) S.cerevisiae	16.19.03 ATP binding	20.03.22 transport ATPases	20.03.25 ABC transporters
gm1.632_g	gm1.632_g	gm1.632_g	scaffold_1:2300161-2301517	171.771	31.7663	-2.43492	0.00141687	yes	5076	IPR005502:ADP-ribosylation/Crystallin J1	sp|Q58588|Y1187_METJA Uncharacterized protein MJ1187 OS=Methanocaldococcus jannaschii (strain ATCC 43067 / DSM 2661 / JAL-1 / JCM 10045 / NBRC 100440) GN=MJ1187 PE=1 SV=1:88.1965	3.2.-.-:Glycosylases.	-	-
estExt_Genewise1Plus.C_270066	estExt_Genewise1Plus.C_270066	estExt_Genewise1Plus.C_270066	scaffold_27:64780-66114	81.449	15.2644	-2.41573	0.00348299	yes	103729	IPR016040:NAD(P)-binding;;IPR002347:Glucose/ribitol dehydrogenase;;IPR002198:Short-chain dehydrogenase/reductase SDR	sp|Q3T0R4|DRS7B_BOVIN Dehydrogenase/reductase SDR family member 7B OS=Bos taurus GN=DHRS7B PE=2 SV=1:93.9745	1.1.1.184:Carbonyl reductase (NADPH).	KOG1205:Predicted dehydrogenase	metabolic process:GO:0008152;;carbonyl reductase (NADPH) activity:GO:0004090;;catalytic activity:GO:0003824;;binding:GO:0005488;;oxidoreductase activity:GO:0016491
e_gw1.16.543.1	e_gw1.16.543.1	e_gw1.16.543.1	scaffold_16:150326-151439	60.39	11.4466	-2.39939	0.00650514	yes	84640	IPR000209:Peptidase S8 and S53, subtilisin, kexin, sedolisin;;IPR012336:Thioredoxin-like fold;;IPR010987:Glutathione S-transferase, C-terminal-like	-	-	KOG0406:Glutathione S-transferase	proteolysis:GO:0006508;;subtilase activity:GO:0004289
estExt_fgenesh1_pg.C_60251	estExt_fgenesh1_pg.C_60251	estExt_fgenesh1_pg.C_60251	scaffold_6:878454-880227	178.781	33.9474	-2.39682	0.00149879	yes	140969	IPR002088:Protein prenyltransferase, alpha subunit	sp|Q9Y765|FNTA_CANAL Protein farnesyltransferase/geranylgeranyltransferase type-1 subunit alpha OS=Candida albicans GN=RAM2 PE=1 SV=1:207.994	-	KOG0530:Protein farnesyltransferase, alpha subunit/protein geranylgeranyltransferase type I, alpha subunit	protein prenyltransferase activity:GO:0008318;;protein amino acid prenylation:GO:0018346	14.07.01 modification with fatty acids (e.g. myristylation, palmitylation, farnesylation) N.crassa
e_gw1.2.438.1	e_gw1.2.438.1	e_gw1.2.438.1	scaffold_2:2171723-2172826	84.1863	16.0479	-2.3912	0.00491362	yes	70775	IPR002539:MaoC-like dehydratase	sp|Q01373|FOX2_NEUCR Peroxisomal hydratase-dehydrogenase-epimerase OS=Neurospora crassa GN=fox-2 PE=1 SV=1:114.39	-	KOG1206:Peroxisomal multifunctional beta-oxidation protein and related enzymes	metabolic process:GO:0008152;;oxidoreductase activity:GO:0016491	01.06 lipid, fatty acid and isoprenoid metabolism N.crassa	02.25 oxidation of fatty acids	42.01 cell wall
estExt_Genewise1.C_270382	estExt_Genewise1.C_270382	estExt_Genewise1.C_270382	scaffold_27:417060-418212	92.6236	17.8281	-2.37722	0.0055439	yes	115504	IPR002925:Dienelactone hydrolase	sp|P39721|AIM2_YEAST Protein AIM2 OS=Saccharomyces cerevisiae (strain ATCC 204508 / S288c) GN=AIM2 PE=1 SV=1:170.244	-	KOG3043:Predicted hydrolase related to dienelactone hydrolase	hydrolase activity:GO:0016787
gm1.6791_g	gm1.6791_g	gm1.6791_g	scaffold_20:346871-348104	467.503	90.191	-2.37392	0.00201171	yes
estExt_Genemark1.C_80122	estExt_Genemark1.C_80122	estExt_Genemark1.C_80122	scaffold_8:458809-460511	1283.04	248.52	-2.36813	0.00846683	yes	24878	IPR016161:Aldehyde/histidinol dehydrogenase;;IPR016160:Aldehyde dehydrogenase, conserved site;;IPR015590:Aldehyde dehydrogenase	sp|P40108|ALDH_DAVTA Aldehyde dehydrogenase OS=Davidiella tassiana GN=CLAH10 PE=1 SV=2:774.237	1.2.1.3:Aldehyde dehydrogenase (NAD+).	KOG2450:Aldehyde dehydrogenase	metabolic process:GO:0008152;;aldehyde dehydrogenase (NAD) activity:GO:0004029;;oxidoreductase activity:GO:0016491	01.01 amino acid metabolism	01.01.03.02 metabolism of glutamate	01.01.03.02.02 degradation of glutamate	01.01.03.03.01 biosynthesis of proline	01.01.05.01.02 degradation of polyamines	01.01.09.04.01 biosynthesis of phenylalanine	01.01.09.05 metabolism of tyrosine	01.01.11 metabolism of the pyruvate family (alanine, isoleucine, leucine, valine) and D-alanine B.subtilis	01.02 nitrogen, sulfur and selenium metabolism B.subtilis	01.05 C-compound and carbohydrate metabolism	01.05.06.07 C-2 compound and organic acid catabolism S.cerevisiae	01.05.11.07.01 aerobic aromate catabolism	01.06 lipid, fatty acid and isoprenoid metabolism	01.06.06 isoprenoid metabolism	01.07 metabolism of vitamins, cofactors, and prosthetic groups N.crassa	01.07.01 biosynthesis of vitamins, cofactors, and prosthetic groups	01.20 secondary metabolism	01.20.05 metabolism of acetic acid derivatives	01.20.17.01 metabolism of nonprotein amino acids	01.20.29 metabolism of secondary products derived from L-glutamic acid, L-proline and L-ornithine	01.20.31 metabolism of secondary products derived from L-lysine, L-arginine and L-histidine	02.11 electron transport and membrane-associated energy conservation S.cerevisiae	02.13 respiration	02.16 fermentation	02.16.01 alcohol fermentation	02.45 energy conversion and regeneration	20.01.15 electron transport	32.01 stress response	32.01.01 oxidative stress response	32.01.03 osmotic and salt stress response	32.05.01 resistance proteins	32.05.03 defense related proteins	32.07.03 detoxification by modification	32.07.09 detoxification by degradation	42.16 mitochondrion
estExt_fgenesh1_pg.C_300039	estExt_fgenesh1_pg.C_300039	estExt_fgenesh1_pg.C_300039	scaffold_30:113891-114721	84.0292	16.5509	-2.34398	0.00752072	yes	143047	IPR013217:Methyltransferase type 12	sp|Q1QJC0|TAM_NITHX Trans-aconitate 2-methyltransferase OS=Nitrobacter hamburgensis (strain X14 / DSM 10229) GN=tam PE=3 SV=1:285.034	-	KOG1331:Predicted methyltransferase	-
e_gw1.1.633.1	e_gw1.1.633.1	e_gw1.1.633.1	scaffold_1:2925594-2929662	73.2803	14.4552	-2.34184	0.00195863	yes	69512	IPR004276:Glycosyl transferase, family 28;;IPR003903:Ubiquitin interacting motif	sp|Q6C8M8|ATG26_YARLI Sterol 3-beta-glucosyltransferase OS=Yarrowia lipolytica (strain CLIB 122 / E 150) GN=ATG26 PE=3 SV=3:280.411	2.4.1.173:Sterol glucosyltransferase.	KOG1192:UDP-glucuronosyl and UDP-glucosyl transferase	transferase activity, transferring hexosyl groups:GO:0016758;;carbohydrate metabolic process:GO:0005975;;sterol 3-beta-glucosyltransferase activity:GO:0016906;;lipid glycosylation:GO:0030259
estExt_fgenesh2_kg.C_50138	estExt_fgenesh2_kg.C_50138	estExt_fgenesh2_kg.C_50138	scaffold_5:1295302-1295958	161.746	31.9896	-2.33806	0.00568153	yes
fgenesh2_kg.5_#_147_#_gi|38136185|gb|CF881503.1|CF881503	fgenesh2_kg.5_#_147_#_gi|38136185|gb|CF881503.1|CF881503	fgenesh2_kg.5_#_147_#_gi|38136185|gb|CF881503.1|CF881503	scaffold_5:1366780-1367741	2129.22	422.66	-2.33276	0.00231058	yes
gm1.6544_g	gm1.6544_g	gm1.6544_g	scaffold_19:137087-139061	28.019	5.59522	-2.32414	0.00812285	yes	10988	IPR001854:Ribosomal protein L29	-	-	-	ribosome:GO:0005840;;structural constituent of ribosome:GO:0003735;;translation:GO:0006412;;intracellular:GO:0005622
e_gw1.40.5.1	e_gw1.40.5.1	e_gw1.40.5.1	scaffold_40:50681-53123	166.271	33.2464	-2.32227	0.00225042	yes	92540	-	-	-	KOG3544:Collagens (type IV and type XIII), and related proteins	-
gw1.22.63.1	gw1.22.63.1	gw1.22.63.1	scaffold_22:102105-103102	100.813	20.1817	-2.32057	0.0060398	yes	43649	IPR006030:Molluscan rhodopsin C-terminal tail	-	-	KOG3227:Calcium-responsive transcription coactivator	G-protein coupled receptor protein signaling pathway:GO:0007186;;rhodopsin-like receptor activity:GO:0001584;;integral to membrane:GO:0016021
estExt_fgenesh2_kg.C_1_t10289	estExt_fgenesh2_kg.C_1_t10289	estExt_fgenesh2_kg.C_1_t10289	scaffold_1:2214925-2216078	733.852	147.153	-2.31818	0.00254378	yes	121668	-	-	-	KOG0123:Polyadenylate-binding protein (RRM superfamily)	-
fgenesh1_pm.2_#_440	fgenesh1_pm.2_#_440	fgenesh1_pm.2_#_440	scaffold_2:1504383-1505857	535.71	108.259	-2.30696	0.00378652	yes	127115	IPR017853:Glycoside hydrolase, catalytic core;;IPR001360:Glycoside hydrolase, family 1	sp|Q25BW4|BGL1B_PHACH Beta-glucosidase 1B OS=Phanerochaete chrysosporium GN=BGL1B PE=1 SV=1:500.745	3.2.1.21:Beta-glucosidase.	KOG0626:Beta-glucosidase, lactase phlorizinhydrolase, and related proteins	hydrolase activity, hydrolyzing O-glycosyl compounds:GO:0004553;;carbohydrate metabolic process:GO:0005975;;beta-glucosidase activity:GO:0008422	01.05 C-compound and carbohydrate metabolism	01.05.02.04 sugar, glucoside, polyol and carboxylate anabolism L.innocua	01.05.02.07 sugar, glucoside, polyol and carboxylate catabolism N.crassa	01.05.03 polysaccharide metabolism	01.20.01.07 metabolism of glycosides	02.01 glycolysis and gluconeogenesis	32.05.03 defense related proteins
e_gw1.6.351.1	e_gw1.6.351.1	e_gw1.6.351.1	scaffold_6:902542-904789	39.152	8.03995	-2.28383	0.00649219	yes	76757	IPR011160:Sphingomyelin phosphodiesterase;;IPR011001:Saposin-like;;IPR004843:Metallophosphoesterase	sp|Q04519|ASM_MOUSE Sphingomyelin phosphodiesterase OS=Mus musculus GN=Smpd1 PE=2 SV=2:252.677	3.1.4.12:Sphingomyelin phosphodiesterase.	KOG3770:Acid sphingomyelinase and PHM5 phosphate metabolism protein	sphingomyelin phosphodiesterase activity:GO:0004767;;hydrolase activity:GO:0016787;;sphingomyelin catabolic process:GO:0006685	01.06 lipid, fatty acid and isoprenoid metabolism	01.06.02.01 phospholipid metabolism
e_gw1.15.423.1	e_gw1.15.423.1	e_gw1.15.423.1	scaffold_15:576280-578419	92.9029	19.0795	-2.2837	0.00353569	yes	84527	IPR000873:AMP-dependent synthetase and ligase	sp|Q54P77|4CL1_DICDI Probable 4-coumarate--CoA ligase 1 OS=Dictyostelium discoideum GN=4cl1 PE=3 SV=1:321.627	6.2.1.12:4-coumarate--CoA ligase.	KOG1176:Acyl-CoA synthetase	4-coumarate-CoA ligase activity:GO:0016207;;metabolic process:GO:0008152;;catalytic activity:GO:0003824	01.01.09.04.01 biosynthesis of phenylalanine	01.01.09.04.02 degradation of phenylalanine	01.05 C-compound and carbohydrate metabolism	01.06.02.01 phospholipid metabolism	01.20 secondary metabolism	01.20.35.01 metabolism of phenylpropanoids	16.19 nucleotide/nucleoside/nucleobase binding B.subtilis
estExt_Genewise1Plus.C_300040	estExt_Genewise1Plus.C_300040	estExt_Genewise1Plus.C_300040	scaffold_30:34984-36773	44.8105	9.20307	-2.28365	0.00807412	yes	104220	IPR007117:Pollen allergen/expansin, C-terminal;;IPR000254:Cellulose-binding region, fungal;;IPR009009:Barwin-related endoglucanase;;IPR007112:Expansin 45, endoglucanase-like	sp|Q40638|EXPB1_ORYSJ Expansin-B1 OS=Oryza sativa subsp. japonica GN=EXPB1a PE=1 SV=2:64.6994	-	KOG4157:beta-1,6-N-acetylglucosaminyltransferase, contains WSC domain	cellulose binding:GO:0030248;;hydrolase activity, hydrolyzing O-glycosyl compounds:GO:0004553;;carbohydrate metabolic process:GO:0005975;;extracellular region:GO:0005576
e_gw1.7.469.1	e_gw1.7.469.1	e_gw1.7.469.1	scaffold_7:1021258-1023365	205.159	42.3011	-2.27798	0.00280144	yes	78569	IPR003495:Cobalamin (vitamin B12) biosynthesis CobW-like;;IPR011629:Cobalamin (vitamin B12) biosynthesis CobW-like, C-terminal	sp|P94400|YCIC_BACSU Putative metal chaperone YciC OS=Bacillus subtilis GN=yciC PE=2 SV=1:270.396	-	KOG2743:Cobalamin synthesis protein	-
estExt_Genemark1.C_220122	estExt_Genemark1.C_220122	estExt_Genemark1.C_220122	scaffold_22:448807-450049	59.1466	12.2196	-2.27509	0.00857607	yes	26328	IPR001395:Aldo/keto reductase	sp|O43488|ARK72_HUMAN Aflatoxin B1 aldehyde reductase member 2 OS=Homo sapiens GN=AKR7A2 PE=1 SV=3:257.299	1.-.-.-:Oxidoreductases.	KOG1575:Voltage-gated shaker-like K+ channel, subunit beta/KCNAB	F420H2 dehydrogenase activity:GO:0043738;;regulation of oxidoreductase activity:GO:0051341;;sulfur oxygenase reductase activity:GO:0043826;;oxidoreductase activity:GO:0016491;;malolactic enzyme activity:GO:0043883	01.05 C-compound and carbohydrate metabolism	01.05.02.07 sugar, glucoside, polyol and carboxylate catabolism	01.20 secondary metabolism	32.07.03 detoxification by modification
fgenesh1_pm.16_#_15	fgenesh1_pm.16_#_15	fgenesh1_pm.16_#_15	scaffold_16:40888-41917	102.577	21.3999	-2.26102	0.00599682	yes	131913	-	-	-	KOG0873:C-4 sterol methyl oxidase	-
estExt_fgenesh1_pm.C_40446	estExt_fgenesh1_pm.C_40446	estExt_fgenesh1_pm.C_40446	scaffold_4:1522060-1524251	128.284	26.8688	-2.25534	0.0031259	yes	136533	IPR001138:Fungal transcriptional regulatory protein, N-terminal	sp|Q9P326|PRO1_NEUCR Transcriptional regulatory protein pro-1 OS=Neurospora crassa GN=pro-1 PE=2 SV=1:905.205	-	-	regulation of transcription, DNA-dependent:GO:0006355;;nucleus:GO:0005634;;zinc ion binding:GO:0008270;;transcription factor activity:GO:0003700	41.01.03.01 fruit body development (sexually or asexually derived spores) N.crassa	16.03.01 DNA binding	16.17.09 heavy metal binding (Cu, Fe, Zn)
estExt_fgenesh1_pg.C_60164	estExt_fgenesh1_pg.C_60164	estExt_fgenesh1_pg.C_60164	scaffold_6:546356-548051	82.6071	17.6079	-2.23004	0.00515078	yes	140931	IPR001810:Cyclin-like F-box	-	-	-	-
gm1.8589_g	gm1.8589_g	gm1.8589_g	scaffold_40:25842-27594	202.898	43.2913	-2.22861	0.00358903	yes	13033	IPR009100:Acyl-CoA dehydrogenase/oxidase, middle and N-terminal;;IPR006091:Acyl-CoA dehydrogenase/oxidase, central region;;IPR001199:Cytochrome b5;;IPR009075:Acyl-CoA dehydrogenase/oxidase C-terminal;;IPR006089:Acyl-CoA dehydrogenase, conserved site;;IPR006090:Acyl-CoA oxidase/dehydrogenase, type 1	sp|Q8HXY7|ACADV_MACFA Very long-chain specific acyl-CoA dehydrogenase, mitochondrial OS=Macaca fascicularis GN=ACADVL PE=2 SV=1:125.561	1.3.99.10:Isovaleryl-CoA dehydrogenase.	KOG0137:Very-long-chain acyl-CoA dehydrogenase	metabolic process:GO:0008152;;electron transport:GO:0006118;;acyl-CoA dehydrogenase activity:GO:0003995;;oxidoreductase activity, acting on the CH-CH group of donors:GO:0016627;;transition metal ion binding:GO:0046914;;heme binding:GO:0020037;;isovaleryl-CoA dehydrogenase activity:GO:0008470	01.06 lipid, fatty acid and isoprenoid metabolism N.crassa	02.25 oxidation of fatty acids
gw1.13.27.1	gw1.13.27.1	gw1.13.27.1	scaffold_13:164269-165162	455.822	99.7007	-2.19279	0.004372	yes	40992	IPR000791:GPR1/FUN34/yaaH	sp|P32907|ATO2_YEAST Ammonia transport outward protein 2 OS=Saccharomyces cerevisiae (strain ATCC 204508 / S288c) GN=ATO2 PE=1 SV=1:199.519	-	-	membrane:GO:0016020	01.02 nitrogen, sulfur and selenium metabolism S.cerevisiae	01.03.16.03 DNA degradation	01.05.25 regulation of C-compound and carbohydrate metabolism S.cerevisiae	10.01 DNA processing	10.03.02 meiosis	20.01.01.01 cation transport (H+, Na+, K+, Ca2+ , NH4+, etc.) S.cerevisiae	20.01.03 C-compound and carbohydrate transport	20.09.16 cellular export and secretion	20.03 transport facilities	20.03.02.03.01 proton driven antiporter
e_gw1.6.907.1	e_gw1.6.907.1	e_gw1.6.907.1	scaffold_6:1314751-1320360	27.1037	6.04703	-2.16419	0.00680875	yes	77141	IPR003593:AAA+ ATPase, core;;IPR011527:ABC transporter, transmembrane region, type 1;;IPR001140:ABC transporter, transmembrane region;;IPR003439:ABC transporter-like	sp|Q5F364|MRP1_CHICK Multidrug resistance-associated protein 1 OS=Gallus gallus GN=ABCC1 PE=2 SV=1:95.1301;;sp|Q5F364|MRP1_CHICK Multidrug resistance-associated protein 1 OS=Gallus gallus GN=ABCC1 PE=2 SV=1:499.59	-	KOG0054:Multidrug resistance-associated protein/mitoxantrone resistance protein, ABC superfamily	nucleoside-triphosphatase activity:GO:0017111;;ATP binding:GO:0005524;;integral to membrane:GO:0016021;;ATPase activity:GO:0016887;;transport:GO:0006810;;nucleotide binding:GO:0000166;;ATPase activity, coupled to transmembrane movement of substances:GO:0042626	01.04 phosphate metabolism	20.01.01.07.08 organic anion transport	20.01.25 vitamine/cofactor transport	20.01.27 drug/toxin transport	20.09.13 vacuolar/lysosomal transport	32.07 detoxification	34.11.03 chemoperception and response	16.01 protein binding	16.19 nucleotide/nucleoside/nucleobase binding	16.19.03 ATP binding	20.03 transport facilities	20.03.25 ABC transporters
estExt_Genewise1Plus.C_8_t10182	estExt_Genewise1Plus.C_8_t10182	estExt_Genewise1Plus.C_8_t10182	scaffold_8:223904-225955	67.1341	15.1048	-2.15204	0.00788045	yes	98796	IPR008259:FMN-dependent alpha-hydroxy acid dehydrogenase, active site;;IPR001199:Cytochrome b5;;IPR000262:FMN-dependent alpha-hydroxy acid dehydrogenase	sp|P09437|CYB2_HANAN Cytochrome b2, mitochondrial OS=Hansenula anomala GN=CYB2 PE=1 SV=2:596.275	1.1.2.3:L-lactate dehydrogenase (cytochrome).	KOG0538:Glycolate oxidase	electron transport:GO:0006118;;L-lactate dehydrogenase (cytochrome) activity:GO:0004460;;transition metal ion binding:GO:0046914;;heme binding:GO:0020037;;oxidoreductase activity:GO:0016491	01.05 C-compound and carbohydrate metabolism	02.11 electron transport and membrane-associated energy conservation S.cerevisiae	02.13 respiration	02.16.03 lactate fermentation	20.01.15 electron transport	42.16 mitochondrion
gm1.5829_g	gm1.5829_g	gm1.5829_g	scaffold_15:494653-495286	354.896	79.8709	-2.15165	0.00664944	yes
estExt_fgenesh1_pm.C_3_t10428	estExt_fgenesh1_pm.C_3_t10428	estExt_fgenesh1_pm.C_3_t10428	scaffold_3:1435435-1437628	220.902	50.8328	-2.11958	0.00746445	yes	136286	IPR008973:C2 calcium/lipid-binding region, CaLB;;IPR000008:C2 calcium-dependent membrane targeting	-	-	-	-
e_gw1.14.396.1	e_gw1.14.396.1	e_gw1.14.396.1	scaffold_14:726223-728275	78.7276	18.6535	-2.07742	0.00918146	yes	83320	IPR000873:AMP-dependent synthetase and ligase	sp|O31826|YNGI_BACSU Putative acyl-CoA synthetase YngI OS=Bacillus subtilis GN=yngI PE=3 SV=1:365.155	6.2.1.3:Long-chain-fatty-acid--CoA ligase.	KOG1177:Long chain fatty acid acyl-CoA ligase	medium-chain-fatty-acid-CoA ligase activity:GO:0031956;;metabolic process:GO:0008152;;short-chain-fatty-acid-CoA ligase activity:GO:0031955;;long-chain-fatty-acid-CoA ligase activity:GO:0004467;;catalytic activity:GO:0003824;;very-long-chain-fatty-acid-CoA ligase activity:GO:0031957;;fatty-acid ligase activity:GO:0015645	01.06 lipid, fatty acid and isoprenoid metabolism N.crassa	01.06.02.01 phospholipid metabolism	16.19 nucleotide/nucleoside/nucleobase binding B.subtilis
fgenesh1_pm.1_#_741	fgenesh1_pm.1_#_741	fgenesh1_pm.1_#_741	scaffold_1:2525153-2526113	85.6488	351.448	2.03681	0.00814667	yes	126327	IPR016040:NAD(P)-binding;;IPR008030:NmrA-like	sp|P39315|QOR2_ECOLI Quinone oxidoreductase 2 OS=Escherichia coli (strain K12) GN=qorB PE=1 SV=1:80.1073	-	-	metabolic process:GO:0008152;;regulation of nitrogen utilization:GO:0006808;;catalytic activity:GO:0003824;;binding:GO:0005488;;transcription repressor activity:GO:0016564
estExt_Genewise1Plus.C_360043	estExt_Genewise1Plus.C_360043	estExt_Genewise1Plus.C_360043	scaffold_36:53716-54871	63.9905	266.492	2.05816	0.00715339	yes	104664	IPR006088:Sterol desaturase	sp|Q7SBB6|ERG3_NEUCR Probable C-5 sterol desaturase OS=Neurospora crassa GN=NCU06207 PE=3 SV=1:511.531	1.3.-.-:Acting on the CH-CH group of donors.	KOG0872:Sterol C5 desaturase	peptidyl-oxazoline dehydrogenase activity:GO:0018129;;2-hydroxycyclohexane-1-carboxyl-CoA dehydrogenase activity:GO:0018495;;2,6-dihydroxycyclohexane-1-carboxyl-CoA dehydrogenase activity:GO:0018496;;peptidyl-thiazoline dehydrogenase activity:GO:0018136;;metabolic process:GO:0008152;;phytoene dehydrogenase activity:GO:0016166;;1-chloro-2,2-bis(4-chlorophenyl)ethane dehydrogenase activity:GO:00184…	01.06 lipid, fatty acid and isoprenoid metabolism N.crassa	01.06.06.11 tetracyclic and pentacyclic triterpenes (cholesterin, steroids and hopanoids) metabolism S.cerevisiae	16.17.09 heavy metal binding (Cu, Fe, Zn)
e_gw1.20.35.1	e_gw1.20.35.1	e_gw1.20.35.1	scaffold_20:102115-103652	34.9612	147.4	2.0759	0.00724607	yes	87111	IPR013027:FAD-dependent pyridine nucleotide-disulphide oxidoreductase;;IPR001327:Pyridine nucleotide-disulphide oxidoreductase, NAD-binding region;;IPR001100:Pyridine nucleotide-disulphide oxidoreductase, class I	sp|Q54NS9|AIFA_DICDI Apoptosis-inducing factor homolog A OS=Dictyostelium discoideum GN=aifA PE=3 SV=1:79.337	1.6.99.3:NADH dehydrogenase.	KOG1336:Monodehydroascorbate/ferredoxin reductase	FAD binding:GO:0050660;;electron transport:GO:0006118;;oxidoreductase activity:GO:0016491;;NADH dehydrogenase activity:GO:0003954
estExt_Genewise1Plus.C_6_t10162	estExt_Genewise1Plus.C_6_t10162	estExt_Genewise1Plus.C_6_t10162	scaffold_6:168583-169920	24.7442	104.977	2.08491	0.00951051	yes	97716	IPR003042:Aromatic-ring hydroxylase;;IPR013027:FAD-dependent pyridine nucleotide-disulphide oxidoreductase;;IPR000103:Pyridine nucleotide-disulphide oxidoreductase, class-II	sp|Q6GIM7|TRXB_STAAR Thioredoxin reductase OS=Staphylococcus aureus (strain MRSA252) GN=trxB PE=3 SV=1:70.0922	-	KOG4716:Thioredoxin reductase	metabolic process:GO:0008152;;electron transport:GO:0006118;;oxidoreductase activity:GO:0016491
fgenesh1_pm.4_#_186	fgenesh1_pm.4_#_186	fgenesh1_pm.4_#_186	scaffold_4:613699-614611	49.5133	215.433	2.12135	0.00658444	yes	128189	IPR012336:Thioredoxin-like fold;;IPR001200:Phosducin	sp|Q2HJA9|PHLP_BOVIN Phosducin-like protein OS=Bos taurus GN=PDCL PE=2 SV=1:75.0998	-	KOG3171:Conserved phosducin-like protein	-
estExt_fgenesh2_kg.C_210029	estExt_fgenesh2_kg.C_210029	estExt_fgenesh2_kg.C_210029	scaffold_21:118695-119470	75.7185	331.118	2.12863	0.00579652	yes
estExt_Genewise1Plus.C_4_t20483	estExt_Genewise1Plus.C_4_t20483	estExt_Genewise1Plus.C_4_t20483	scaffold_4:1175430-1177890	8.48354	37.6569	2.15018	0.0084353	yes	97114	IPR006025:Peptidase M, neutral zinc metallopeptidases, zinc-binding site;;IPR001567:Peptidase M3A and M3B, thimet/oligopeptidase F	sp|A4RF25|PMIP_MAGO7 Mitochondrial intermediate peptidase OS=Magnaporthe oryzae (strain 70-15 / FGSC 8958) GN=OCT1 PE=3 SV=1:1001.12	3.4.24.59:Mitochondrial intermediate peptidase.	KOG2090:Metalloendopeptidase family - mitochondrial intermediate peptidase	metallopeptidase activity:GO:0008237;;zinc ion binding:GO:0008270;;mitochondrial intermediate peptidase activity:GO:0004243;;proteolysis:GO:0006508;;metalloendopeptidase activity:GO:0004222	14.07.11 protein processing (proteolytic)	14.13 protein/peptide degradation	34.01.01.01 homeostasis of metal ions (Na, K, Ca etc.) S.cerevisiae
fgenesh1_pg.13_#_136	fgenesh1_pg.13_#_136	fgenesh1_pg.13_#_136	scaffold_13:534320-535816	40.4585	182.961	2.17702	0.00395137	yes	36636	IPR003780:Cytochrome oxidase assembly	sp|Q10361|ETP1_SCHPO Electron transfer protein 1, mitochondrial OS=Schizosaccharomyces pombe (strain ATCC 38366 / 972) GN=etp1 PE=1 SV=2:400.208	-	KOG2725:Cytochrome oxidase assembly factor COX15	protein complex assembly:GO:0006461;;membrane:GO:0016020	01.07.01 biosynthesis of vitamins, cofactors, and prosthetic groups S.cerevisiae	01.20.19.01 metabolism of porphyrins	02.13 respiration	02.13.03 aerobic respiration	14.10 assembly of protein complexes	16.01 protein binding
estExt_fgenesh1_pm.C_50128	estExt_fgenesh1_pm.C_50128	estExt_fgenesh1_pm.C_50128	scaffold_5:439566-441065	60.5271	274.079	2.17894	0.00454866	yes	136573	IPR008333:Oxidoreductase FAD-binding region;;IPR001433:Oxidoreductase FAD/NAD(P)-binding;;IPR001834:NADH:cytochrome b5 reductase (CBR);;IPR009050:Globin-like;;IPR000971:Globin, subset	sp|P49852|HMP_BACSU Flavohemoprotein OS=Bacillus subtilis GN=hmp PE=2 SV=1:296.975	-	KOG3378:Globins and related hemoproteins	nitric oxide dioxygenase activity:GO:0008941;;electron transport:GO:0006118;;oxidoreductase activity:GO:0016491;;heme binding:GO:0020037;;iron ion binding:GO:0005506	01.02 nitrogen, sulfur and selenium metabolism N.crassa	02.13.01 anaerobic respiration	20.01.15 electron transport	32.01 stress response	32.05.01.03 chemical agent resistance
estExt_fgenesh2_kg.C_70036	estExt_fgenesh2_kg.C_70036	estExt_fgenesh2_kg.C_70036	scaffold_7:276935-278354	81.7028	370.258	2.18007	0.0053297	yes	123006	IPR008551:Protein of unknown function DUF833	sp|Q6ICL3|CV025_HUMAN Uncharacterized protein C22orf25 OS=Homo sapiens GN=C22orf25 PE=2 SV=1:92.8189	-	KOG2342:Uncharacterized conserved protein	-
estExt_Genewise1Plus.C_3_t10343	estExt_Genewise1Plus.C_3_t10343	estExt_Genewise1Plus.C_3_t10343	scaffold_3:406070-407353	14.6116	66.2925	2.18173	0.00984756	yes	96232	IPR001993:Mitochondrial substrate carrier	sp|Q01356|ARG13_NEUCR Amino-acid transporter arg-13 OS=Neurospora crassa GN=arg-13 PE=2 SV=1:441.039	-	KOG0758:Mitochondrial carnitine-acylcarnitine carrier protein	transport:GO:0006810;;binding:GO:0005488;;membrane:GO:0016020	01.01 amino acid metabolism	01.01.03.05.01 biosynthesis of arginine	20.01.07 amino acid/amino acid derivatives transport N.crassa	20.09.04 mitochondrial transport
estExt_Genewise1.C_380094	estExt_Genewise1.C_380094	estExt_Genewise1.C_380094	scaffold_38:96419-99070	65.8154	299.61	2.18659	0.00787038	yes	116453	IPR000447:FAD-dependent glycerol-3-phosphate dehydrogenase;;IPR006076:FAD dependent oxidoreductase	sp|P43304|GPDM_HUMAN Glycerol-3-phosphate dehydrogenase, mitochondrial OS=Homo sapiens GN=GPD2 PE=1 SV=3:572.392	1.1.99.5:Glycerol-3-phosphate dehydrogenase.	KOG0042:Glycerol-3-phosphate dehydrogenase	glycerol-3-phosphate dehydrogenase activity:GO:0004368;;glycerol-3-phosphate dehydrogenase complex:GO:0009331;;glycerol-3-phosphate metabolic process:GO:0006072;;oxidoreductase activity:GO:0016491	01.05.02.07 sugar, glucoside, polyol and carboxylate catabolism	01.06.02.01 phospholipid metabolism	02.01 glycolysis and gluconeogenesis	20.01.15 electron transport	30.01 cellular signalling	30.05.01.12.05 insulin receptor signalling pathway	16.13 C-compound binding	16.17.01 calcium binding	16.21.05 FAD/FMN binding
estExt_Genewise1.C_8_t10261	estExt_Genewise1.C_8_t10261	estExt_Genewise1.C_8_t10261	scaffold_8:321888-324157	30.769	140.396	2.18995	0.00384329	yes	110465	IPR000679:Zinc finger, GATA-type	sp|Q92259|SREP_PENCH GATA factor SREP OS=Penicillium chrysogenum GN=SREP PE=4 SV=1:205.682	-	KOG1601:GATA-4/5/6 transcription factors	regulation of transcription, DNA-dependent:GO:0006355;;nucleus:GO:0005634;;zinc ion binding:GO:0008270;;transcription factor activity:GO:0003700;;sequence-specific DNA binding:GO:0043565	11.02.03.04 transcriptional control	34.01.01.01 homeostasis of metal ions (Na, K, Ca etc.) N.crassa	16.03.01 DNA binding
e_gw1.3.1459.1	e_gw1.3.1459.1	e_gw1.3.1459.1	scaffold_3:465499-467674	25.2736	118.063	2.22386	0.0031259	yes	73724	IPR003593:AAA+ ATPase, core;;IPR003959:AAA ATPase, core;;IPR001270:Chaperonin clpA/B;;IPR013093:ATPase AAA-2	sp|O74402|HSP78_SCHPO Heat shock protein 78, mitochondrial OS=Schizosaccharomyces pombe (strain ATCC 38366 / 972) GN=hsp78 PE=2 SV=1:947.192	-	KOG1051:Chaperone HSP104 and related ATP-dependent Clp proteases	nucleoside-triphosphatase activity:GO:0017111;;ATP binding:GO:0005524;;nucleotide binding:GO:0000166	01.04 phosphate metabolism	14.01 protein folding and stabilization	14.04 protein targeting, sorting and translocation S.cerevisiae	14.13 protein/peptide degradation	20.01.10 protein transport	20.09.04 mitochondrial transport	32.01 stress response	32.01.05 heat shock response	32.01.07 unfolded protein response (e.g. ER quality control) S.cerevisiae	16.01 protein binding	16.19.03 ATP binding
estExt_fgenesh1_pm.C_160198	estExt_fgenesh1_pm.C_160198	estExt_fgenesh1_pm.C_160198	scaffold_16:645134-647267	117.323	553.747	2.23874	0.00766744	yes	138254	IPR001891:Malic oxidoreductase;;IPR016040:NAD(P)-binding;;IPR012302:Malic enzyme, NAD-binding;;IPR012301:Malic enzyme, N-terminal	sp|Q6TU48|MAOX_DICDI NADP-dependent malic enzyme OS=Dictyostelium discoideum GN=malA PE=2 SV=1:495.352	1.1.1.40:Malate dehydrogenase (oxaloacetate decarboxylating) (NADP+).	KOG1257:NADP+-dependent malic enzyme	oxidoreductase activity, acting on the CH-OH group of donors, NAD or NADP as acceptor:GO:0016616;;NAD binding:GO:0051287;;malic enzyme activity:GO:0004470;;metabolic process:GO:0008152;;malate metabolic process:GO:0006108;;catalytic activity:GO:0003824;;binding:GO:0005488;;malate dehydrogenase (oxaloacetate-decarboxylating) (NADP+) activity:GO:0004473	01.01.11 metabolism of the pyruvate family (alanine, isoleucine, leucine, valine) and D-alanine S.cerevisiae	01.05 C-compound and carbohydrate metabolism	01.05.02.07 sugar, glucoside, polyol and carboxylate catabolism B.subtilis	01.06 lipid, fatty acid and isoprenoid metabolism A.thaliana	02.09 anaplerotic reactions	02.10 tricarboxylic-acid pathway (citrate cycle, Krebs cycle, TCA cycle) A.thaliana	02.11 electron transport and membrane-associated energy conservation	16.21.07 NAD/NADP binding
fgenesh1_pg.2_#_208	fgenesh1_pg.2_#_208	fgenesh1_pg.2_#_208	scaffold_2:756137-757297	25.1414	120.435	2.26012	0.00454866	yes
estExt_Genewise1Plus.C_7_t10164	estExt_Genewise1Plus.C_7_t10164	estExt_Genewise1Plus.C_7_t10164	scaffold_7:198474-199901	31.7173	153.415	2.27409	0.0031259	yes	98204	IPR006219:DHAP synthase, class 1;;IPR006218:DAHP synthetase I/KDSA	sp|P32449|AROG_YEAST Phospho-2-dehydro-3-deoxyheptonate aldolase, tyrosine-inhibited OS=Saccharomyces cerevisiae (strain ATCC 204508 / S288c) GN=ARO4 PE=1 SV=2:496.123	-	-	3-deoxy-7-phosphoheptulonate synthase activity:GO:0003849;;biosynthetic process:GO:0009058;;aromatic amino acid family biosynthetic process:GO:0009073	01.01 amino acid metabolism	01.01.09 metabolism of the cysteine - aromatic group S.cerevisiae	01.05.11.04 aromate anabolism	01.20.15 metabolism of derivatives of dehydroquinic acid, shikimic acid and chorismic acid S.cerevisiae
e_gw1.12.485.1	e_gw1.12.485.1	e_gw1.12.485.1	scaffold_12:682367-683615	147.067	714.168	2.27979	0.00411907	yes	81999	IPR001138:Fungal transcriptional regulatory protein, N-terminal	sp|O93870|FCR1_CANAL Fluconazole resistance protein 1 OS=Candida albicans GN=FCR1 PE=4 SV=1:77.411	-	-	regulation of transcription, DNA-dependent:GO:0006355;;nucleus:GO:0005634;;zinc ion binding:GO:0008270;;transcription factor activity:GO:0003700	11.02.03.04 transcriptional control	32.05.01.03 chemical agent resistance
e_gw1.1.1078.1	e_gw1.1.1078.1	e_gw1.1.1078.1	scaffold_1:2622522-2624701	6.64539	32.3083	2.28148	0.00782797	yes	69459	IPR001375:Peptidase S9, prolyl oligopeptidase active site region	sp|P34422|DPF6_CAEEL Dipeptidyl peptidase family member 6 OS=Caenorhabditis elegans GN=dpf-6 PE=2 SV=2:103.219	-	KOG2100:Dipeptidyl aminopeptidase	serine-type peptidase activity:GO:0008236;;proteolysis:GO:0006508
e_gw1.1.335.1	e_gw1.1.335.1	e_gw1.1.335.1	scaffold_1:2687220-2689261	15.8394	78.795	2.31459	0.00281303	yes	69465	IPR015884:Malic enzyme, conserved site;;IPR001891:Malic oxidoreductase;;IPR016040:NAD(P)-binding;;IPR012302:Malic enzyme, NAD-binding;;IPR012301:Malic enzyme, N-terminal	sp|P36013|MAOM_YEAST NAD-dependent malic enzyme, mitochondrial OS=Saccharomyces cerevisiae (strain ATCC 204508 / S288c) GN=MAE1 PE=1 SV=1:582.022	1.1.1.38:Malate dehydrogenase (oxaloacetate decarboxylating).	KOG1257:NADP+-dependent malic enzyme	malate dehydrogenase (oxaloacetate-decarboxylating) activity:GO:0016619;;metabolic process:GO:0008152;;oxidoreductase activity, acting on the CH-OH group of donors, NAD or NADP as acceptor:GO:0016616;;NAD binding:GO:0051287;;malate metabolic process:GO:0006108;;malic enzyme activity:GO:0004470;;catalytic activity:GO:0003824;;binding:GO:0005488	01.01.11 metabolism of the pyruvate family (alanine, isoleucine, leucine, valine) and D-alanine S.cerevisiae	01.05 C-compound and carbohydrate metabolism	01.05.02.07 sugar, glucoside, polyol and carboxylate catabolism B.subtilis	01.06 lipid, fatty acid and isoprenoid metabolism A.thaliana	02.09 anaplerotic reactions	02.10 tricarboxylic-acid pathway (citrate cycle, Krebs cycle, TCA cycle) A.thaliana	02.11 electron transport and membrane-associated energy conservation	16.21.07 NAD/NADP binding
estExt_Genewise1Plus.C_210115	estExt_Genewise1Plus.C_210115	estExt_Genewise1Plus.C_210115	scaffold_21:146645-148714	90.8997	453.431	2.31854	0.00373202	yes	102793	IPR007114:Major facilitator superfamily;;IPR011701:Major facilitator superfamily MFS-1;;IPR016196:MFS general substrate transporter	sp|Q9C101|YKT8_SCHPO Uncharacterized MFS-type transporter PB1E7.08c OS=Schizosaccharomyces pombe (strain ATCC 38366 / 972) GN=SPAPB1E7.08c PE=1 SV=1:365.54	-	KOG0253:Synaptic vesicle transporter SV2 (major facilitator superfamily)	transporter activity:GO:0005215;;integral to membrane:GO:0016021;;transport:GO:0006810
e_gw1.1.2909.1	e_gw1.1.2909.1	e_gw1.1.2909.1	scaffold_1:1961195-1962837	8.89856	44.3976	2.31884	0.00620677	yes	69350	IPR002293:Amino acid/polyamine transporter I;;IPR004841:Amino acid permease-associated region	sp|P50276|MUP1_YEAST High-affinity methionine permease OS=Saccharomyces cerevisiae (strain ATCC 204508 / S288c) GN=MUP1 PE=1 SV=1:516.924	-	KOG1287:Amino acid transporters	amino acid transmembrane transporter activity:GO:0015171;;transport:GO:0006810;;membrane:GO:0016020;;amino acid transport:GO:0006865	01.01 amino acid metabolism	20.01.07 amino acid/amino acid derivatives transport S.cerevisiae	20.09.18 cellular import	20.09.18.07 non-vesicular cellular import
estExt_fgenesh1_pg.C_100198	estExt_fgenesh1_pg.C_100198	estExt_fgenesh1_pg.C_100198	scaffold_10:820024-821509	14.8722	74.8777	2.33192	0.00336086	yes	141598	IPR014756:Immunoglobulin E-set	sp|Q10347|YDA5_SCHPO Uncharacterized protein C1F12.05 OS=Schizosaccharomyces pombe (strain ATCC 38366 / 972) GN=SPAC1F12.05 PE=2 SV=1:175.637	-	-	-
estExt_Genewise1Plus.C_220097	estExt_Genewise1Plus.C_220097	estExt_Genewise1Plus.C_220097	scaffold_22:113636-115990	18.539	93.7353	2.33803	0.00188784	yes	102985	IPR004364:Aminoacyl-tRNA synthetase, class II (D, K and N);;IPR006195:Aminoacyl-tRNA synthetase, class II;;IPR002312:Aspartyl-tRNA synthetase, class IIb	sp|Q6PI48|SYDM_HUMAN Aspartyl-tRNA synthetase, mitochondrial OS=Homo sapiens GN=DARS2 PE=1 SV=1:305.449	6.1.1.12:Aspartate--tRNA ligase.	KOG2411:Aspartyl-tRNA synthetase, mitochondrial	cytoplasm:GO:0005737;;ATP binding:GO:0005524;;tRNA aminoacylation for protein translation:GO:0006418;;aminoacyl-tRNA ligase activity:GO:0004812;;translation:GO:0006412;;aspartyl-tRNA aminoacylation:GO:0006422;;nucleotide binding:GO:0000166;;aspartate-tRNA ligase activity:GO:0004815	12.04 translation	12.10 aminoacyl-tRNA-synthetases	16.03 nucleic acid binding	16.19 nucleotide/nucleoside/nucleobase binding	16.19.03 ATP binding
e_gw1.1.2564.1	e_gw1.1.2564.1	e_gw1.1.2564.1	scaffold_1:2746391-2748158	17.3427	88.7921	2.3561	0.00222548	yes	67463	IPR000634:Serine/threonine dehydratase, pyridoxal-phosphate-binding site;;IPR001926:Pyridoxal phosphate-dependent enzyme, beta subunit;;IPR005787:Threonine dehydratase I;;IPR001721:Threonine dehydratase, C-terminal	sp|O42615|THDH_BLAAD Threonine dehydratase, mitochondrial OS=Blastobotrys adeninivorans GN=ILV1 PE=3 SV=1:615.15	-	KOG1250:Threonine/serine dehydratases	pyridoxal phosphate binding:GO:0030170;;metabolic process:GO:0008152;;L-threonine ammonia-lyase activity:GO:0004794;;amino acid metabolic process:GO:0006520;;catalytic activity:GO:0003824;;isoleucine biosynthetic process:GO:0009097	01.01.06.04.02 degradation of threonine	01.01.09.02 metabolism of serine	01.01.11 metabolism of the pyruvate family (alanine, isoleucine, leucine, valine) and D-alanine S.cerevisiae	01.01.11.02.01 biosynthesis of isoleucine
estExt_Genewise1Plus.C_210056	estExt_Genewise1Plus.C_210056	estExt_Genewise1Plus.C_210056	scaffold_21:53503-54968	174.954	901.07	2.36466	0.00462975	yes	102759	IPR001260:Coproporphyrinogen III oxidase	sp|P11353|HEM6_YEAST Coproporphyrinogen-III oxidase OS=Saccharomyces cerevisiae (strain ATCC 204508 / S288c) GN=HEM13 PE=1 SV=2:392.504	1.3.3.3:Coproporphyrinogen oxidase.	KOG1518:Coproporphyrinogen III oxidase CPO/HEM13	porphyrin biosynthetic process:GO:0006779;;coproporphyrinogen oxidase activity:GO:0004109	01.07.01 biosynthesis of vitamins, cofactors, and prosthetic groups S.cerevisiae	01.20.19.01 metabolism of porphyrins	16.17.09 heavy metal binding (Cu, Fe, Zn)
e_gw1.5.1072.1	e_gw1.5.1072.1	e_gw1.5.1072.1	scaffold_5:500237-500702	39.5406	205.064	2.37467	0.00752072	yes
estExt_fgenesh2_kg.C_180071	estExt_fgenesh2_kg.C_180071	estExt_fgenesh2_kg.C_180071	scaffold_18:516788-518139	169.184	882.142	2.38242	0.00353569	yes	124396	IPR005828:General substrate transporter;;IPR007114:Major facilitator superfamily;;IPR003663:Sugar transporter;;IPR016196:MFS general substrate transporter;;IPR005829:Sugar transporter, conserved site	sp|P49374|HGT1_KLULA High-affinity glucose transporter OS=Kluyveromyces lactis (strain ATCC 8585 / CBS 2359 / DSM 70799 / NBRC 1267 / NRRL Y-1140 / WM37) GN=HGT1 PE=3 SV=1:341.658	5.3.1.4:L-arabinose isomerase.	KOG0254:Predicted transporter (major facilitator superfamily)	sugar:hydrogen symporter activity:GO:0005351;;L-arabinose isomerase activity:GO:0008733;;carbohydrate transport:GO:0008643;;transporter activity:GO:0005215;;integral to membrane:GO:0016021;;transport:GO:0006810;;membrane:GO:0016020	20.01.03 C-compound and carbohydrate transport	20.09.18.07 non-vesicular cellular import
estExt_Genewise1Plus.C_230020	estExt_Genewise1Plus.C_230020	estExt_Genewise1Plus.C_230020	scaffold_23:32090-33171	85.2329	445.096	2.38463	0.00141687	yes	103154	IPR012336:Thioredoxin-like fold;;IPR003782:Copper chaperone SCO1/SenC;;IPR017276:Synthesis of cytochrome c oxidase, Sco1/Sco2	sp|P23833|SCO1_YEAST Protein SCO1, mitochondrial OS=Saccharomyces cerevisiae (strain ATCC 204508 / S288c) GN=SCO1 PE=1 SV=1:254.603	-	KOG2792:Putative cytochrome C oxidase assembly protein	copper ion transport:GO:0006825;;mitochondrial inner membrane:GO:0005743;;respiratory chain complex IV assembly:GO:0008535;;copper ion binding:GO:0005507;;electron transport:GO:0006118;;cellular copper ion homeostasis:GO:0006878	12.07 translational control	14.10 assembly of protein complexes	20.01.01.01.01 heavy metal ion transport (Cu+, Fe3+, etc.) S.cerevisiae	34.01.01.01 homeostasis of metal ions (Na, K, Ca etc.) S.cerevisiae	16.17.09 heavy metal binding (Cu, Fe, Zn)
estExt_Genewise1Plus.C_8_t10341	estExt_Genewise1Plus.C_8_t10341	estExt_Genewise1Plus.C_8_t10341	scaffold_8:431453-432962	38.7423	202.562	2.38638	0.00156963	yes	98886	IPR001993:Mitochondrial substrate carrier	sp|P38988|GGC1_YEAST Mitochondrial GTP/GDP carrier protein 1 OS=Saccharomyces cerevisiae (strain ATCC 204508 / S288c) GN=GGC1 PE=1 SV=1:458.373	-	KOG0750:Mitochondrial solute carrier protein	transport:GO:0006810;;binding:GO:0005488;;membrane:GO:0016020	01.20.19.01 metabolism of porphyrins	20.01.01.01.01 heavy metal ion transport (Cu+, Fe3+, etc.) S.cerevisiae	20.01.03 C-compound and carbohydrate transport	20.01.17 nucleotide/nucleoside/nucleobase transport S.cerevisiae	20.09.04 mitochondrial transport	34.01.01.01 homeostasis of metal ions (Na, K, Ca etc.) S.cerevisiae	42.16 mitochondrion	20.03 transport facilities
e_gw1.7.188.1	e_gw1.7.188.1	e_gw1.7.188.1	scaffold_7:962166-964887	6.89101	36.2669	2.39586	0.00369921	yes	78541	IPR007219:Fungal specific transcription factor;;IPR001138:Fungal transcriptional regulatory protein, N-terminal	sp|P52959|CTF1B_FUSSO Cutinase transcription factor 1 beta OS=Fusarium solani subsp. pisi GN=CTF1-BETA PE=2 SV=1:200.29	-	-	regulation of transcription, DNA-dependent:GO:0006355;;nucleus:GO:0005634;;zinc ion binding:GO:0008270;;transcription:GO:0006350;;DNA binding:GO:0003677;;transcription factor activity:GO:0003700
estExt_Genemark1.C_40329	estExt_Genemark1.C_40329	estExt_Genemark1.C_40329	scaffold_4:1173419-1174480	51.2872	270.96	2.40141	0.00141687	yes	24262	-	sp|P50087|YG4Y_YEAST Uncharacterized protein YGR235C OS=Saccharomyces cerevisiae (strain ATCC 204508 / S288c) GN=YGR235C PE=1 SV=1:69.707	-	-	-
e_gw1.25.293.1	e_gw1.25.293.1	e_gw1.25.293.1	scaffold_25:7621-9723	63.4259	338.523	2.41611	0.00164756	yes	89166	IPR014756:Immunoglobulin E-set;;IPR011022:Arrestin-like, C-terminal;;IPR011021:Arrestin-like, N-terminal	sp|Q6SIF1|CRED_EMENI HECT-type ubiquitin ligase-interacting protein creD OS=Emericella nidulans GN=creD PE=1 SV=1:374.785	-	KOG3780:Thioredoxin binding protein TBP-2/VDUP1	-
estExt_Genewise1Plus.C_1_t10132	estExt_Genewise1Plus.C_1_t10132	estExt_Genewise1Plus.C_1_t10132	scaffold_1:177274-179343	13.0423	70.8394	2.44136	0.00185679	yes	93755	IPR006096:Glutamate/phenylalanine/leucine/valine dehydrogenase, C-terminal;;IPR006095:Glutamate/phenylalanine/leucine/valine dehydrogenase;;IPR016040:NAD(P)-binding;;IPR014362:Glutamate dehydrogenase;;IPR006097:Glutamate/phenylalanine/leucine/valine dehydrogenase, dimerisation region	sp|Q96VJ7|DHE4_GIBFU NADP-specific glutamate dehydrogenase OS=Gibberella fujikuroi GN=GDH2 PE=3 SV=1:743.036	1.4.1.4:Glutamate dehydrogenase (NADP+).	KOG2250:Glutamate/leucine/phenylalanine/valine dehydrogenases	metabolic process:GO:0008152;;glutamate dehydrogenase (NADP+) activity:GO:0004354;;amino acid metabolic process:GO:0006520;;catalytic activity:GO:0003824;;binding:GO:0005488;;oxidoreductase activity:GO:0016491	01.01.03 assimilation of ammonia, metabolism of the glutamate group T.acidophilum	01.01.03.01.02 degradation of glutamine	01.01.03.02.01 biosynthesis of glutamate	01.01.03.02.02 degradation of glutamate	01.01.03.03.02 degradation of proline	01.01.03.05.02 degradation of arginine	01.02 nitrogen, sulfur and selenium metabolism N.crassa	02.10 tricarboxylic-acid pathway (citrate cycle, Krebs cycle, TCA cycle) S.cerevisiae	42.01 cell wall	16.21.07 NAD/NADP binding
estExt_fgenesh2_kg.C_1_t20016	estExt_fgenesh2_kg.C_1_t20016	estExt_fgenesh2_kg.C_1_t20016	scaffold_1:3494496-3495186	13.2936	73.091	2.45896	0.00977573	yes
gw1.16.492.1	gw1.16.492.1	gw1.16.492.1	scaffold_16:318010-318495	115.958	638.904	2.462	0.00715339	yes	60402	IPR000612:Protein of unknown function UPF0057	sp|Q4WYA5|PMP3_ASPFU Plasma membrane proteolipid 3 OS=Neosartorya fumigata (strain ATCC MYA-4609 / Af293 / CBS 101355 / FGSC A1100) GN=pmp3 PE=3 SV=1:63.1586	-	KOG1773:Stress responsive protein	integral to membrane:GO:0016021
fgenesh2_kg.7_#_20_#_gi|18498033|gb|BM076851.1|BM076851	fgenesh2_kg.7_#_20_#_gi|18498033|gb|BM076851.1|BM076851	fgenesh2_kg.7_#_20_#_gi|18498033|gb|BM076851.1|BM076851	scaffold_7:94790-95385	79.2922	438.654	2.46783	0.00168258	yes
estExt_Genewise1.C_11_t20171	estExt_Genewise1.C_11_t20171	estExt_Genewise1.C_11_t20171	scaffold_11:825827-827381	6.40356	35.4626	2.46935	0.00577821	yes	111892	IPR015424:Pyridoxal phosphate-dependent transferase, major region;;IPR005814:Aminotransferase class-III	sp|O94492|YC7B_SCHPO Uncharacterized aminotransferase C417.11c OS=Schizosaccharomyces pombe (strain ATCC 38366 / 972) GN=SPCC417.11c PE=2 SV=1:382.104	5.4.3.8:Glutamate-1-semialdehyde 2,1-aminomutase.	KOG1401:Acetylornithine aminotransferase	pyridoxal phosphate binding:GO:0030170;;transaminase activity:GO:0008483;;glutamate-1-semialdehyde 2,1-aminomutase activity:GO:0042286	01.07.01 biosynthesis of vitamins, cofactors, and prosthetic groups N.crassa	01.20 secondary metabolism	01.20.19.01 metabolism of porphyrins
estExt_fgenesh1_pg.C_70216	estExt_fgenesh1_pg.C_70216	estExt_fgenesh1_pg.C_70216	scaffold_7:837928-839679	13.0638	73.9246	2.50048	0.00142659	yes	141126	IPR002213:UDP-glucuronosyl/UDP-glucosyltransferase	sp|Q6K1J1|UDB31_CANFA UDP-glucuronosyltransferase 2B31 OS=Canis familiaris GN=UGT2B31 PE=1 SV=1:61.6178	-	KOG1192:UDP-glucuronosyl and UDP-glucosyl transferase	transferase activity, transferring hexosyl groups:GO:0016758;;metabolic process:GO:0008152
e_gw1.11.309.1	e_gw1.11.309.1	e_gw1.11.309.1	scaffold_11:494282-496235	18.4074	104.353	2.50311	0.000819969	yes	81383	IPR004147:ABC-1;;IPR011009:Protein kinase-like	sp|O60111|YG62_SCHPO ABC1 family protein C15C4.02 OS=Schizosaccharomyces pombe (strain ATCC 38366 / 972) GN=SPBC15C4.02 PE=2 SV=1:452.981	-	KOG1235:Predicted unusual protein kinase	-	01.04 phosphate metabolism	14.07.03 modification by phosphorylation, dephosphorylation, autophosphorylation &nbsp;
estExt_Genewise1Plus.C_2_t20055	estExt_Genewise1Plus.C_2_t20055	estExt_Genewise1Plus.C_2_t20055	scaffold_2:670391-671711	6.7099	38.3491	2.51483	0.00547221	yes	95336	IPR001917:Aminotransferase, class-II, pyridoxal-phosphate binding site;;IPR005861:Histidinol-phosphate aminotransferase;;IPR015424:Pyridoxal phosphate-dependent transferase, major region;;IPR004839:Aminotransferase, class I and II	sp|P36605|HIS8_SCHPO Histidinol-phosphate aminotransferase OS=Schizosaccharomyces pombe (strain ATCC 38366 / 972) GN=his3 PE=2 SV=1:399.823	2.6.1.9:Histidinol-phosphate aminotransferase.	KOG0633:Histidinol phosphate aminotransferase	pyridoxal phosphate binding:GO:0030170;;metabolic process:GO:0008152;;transferase activity:GO:0016740;;biosynthetic process:GO:0009058;;histidinol-phosphate transaminase activity:GO:0004400;;transferase activity, transferring nitrogenous groups:GO:0016769;;histidine biosynthetic process:GO:0000105	01.01.09.04.01 biosynthesis of phenylalanine	01.01.09.05.01 biosynthesis of tyrosine	01.01.09.07.01 biosynthesis of histidine	16.21.17 pyridoxal phosphate binding
estExt_fgenesh1_pg.C_370029	estExt_fgenesh1_pg.C_370029	estExt_fgenesh1_pg.C_370029	scaffold_37:132337-133317	42.9682	245.859	2.51649	0.00070672	yes	143221	IPR003719:Phenazine biosynthesis PhzC/PhzF protein	sp|Q98KN6|Y1393_RHILO Uncharacterized isomerase mll1393 OS=Rhizobium loti GN=mll1393 PE=3 SV=1:94.7449	-	KOG3033:Predicted PhzC/PhzF-type epimerase	biosynthetic process:GO:0009058;;catalytic activity:GO:0003824	01.20 secondary metabolism
estExt_Genemark1.C_260009	estExt_Genemark1.C_260009	estExt_Genemark1.C_260009	scaffold_26:20866-22266	65.375	376.234	2.52482	0.000708751	yes	26481	IPR006797:MSF1	sp|P35200|UPS2_YEAST Protein UPS2, mitochondrial OS=Saccharomyces cerevisiae (strain ATCC 204508 / S288c) GN=UPS2 PE=1 SV=1:142.51	-	KOG3336:Predicted member of the intramitochondrial sorting protein family	-	12.10 aminoacyl-tRNA-synthetases	14.04 protein targeting, sorting and translocation N.crassa
estExt_Genewise1Plus.C_19_t10325	estExt_Genewise1Plus.C_19_t10325	estExt_Genewise1Plus.C_19_t10325	scaffold_19:419441-420969	147.909	853.667	2.52896	0.00205079	yes	102433	IPR008333:Oxidoreductase FAD-binding region;;IPR001433:Oxidoreductase FAD/NAD(P)-binding;;IPR009050:Globin-like;;IPR000971:Globin, subset	sp|Q7TTP0|HMP_BORPE Flavohemoprotein OS=Bordetella pertussis GN=hmp PE=3 SV=1:317.775	-	KOG3378:Globins and related hemoproteins	nitric oxide dioxygenase activity:GO:0008941;;electron transport:GO:0006118;;oxidoreductase activity:GO:0016491;;heme binding:GO:0020037;;iron ion binding:GO:0005506	01.02 nitrogen, sulfur and selenium metabolism N.crassa	02.13.01 anaerobic respiration	20.01.15 electron transport	32.01 stress response	32.05.01.03 chemical agent resistance
estExt_Genewise1Plus.C_15_t10070	estExt_Genewise1Plus.C_15_t10070	estExt_Genewise1Plus.C_15_t10070	scaffold_15:88829-90633	51.5873	298.314	2.53174	0.000629916	yes	101318	IPR009049:Argininosuccinate lyase;;IPR000362:Fumarate lyase;;IPR008948:L-Aspartase-like;;IPR003031:Delta crystallin	sp|P50514|ARLZ_SCHPO Probable argininosuccinate lyase OS=Schizosaccharomyces pombe (strain ATCC 38366 / 972) GN=argx PE=2 SV=1:568.54	4.3.2.1:Argininosuccinate lyase.	KOG1316:Argininosuccinate lyase	argininosuccinate lyase activity:GO:0004056;;catalytic activity:GO:0003824;;arginine biosynthetic process via ornithine:GO:0042450	01.01.03.05.01 biosynthesis of arginine	01.01.03.05.02 degradation of arginine	01.01.05.03 metabolism of urea (urea cycle)	01.01.06.01 metabolism of aspartate
estExt_Genewise1Plus.C_280306	estExt_Genewise1Plus.C_280306	estExt_Genewise1Plus.C_280306	scaffold_28:307487-309308	19.8681	120.928	2.60563	0.000501106	yes	104011	IPR003594:ATP-binding region, ATPase-like	sp|P53170|PKP2_YEAST Pyruvate dehydrogenase kinase 2, mitochondrial OS=Saccharomyces cerevisiae (strain ATCC 204508 / S288c) GN=PKP2 PE=1 SV=2:237.269	-	KOG0787:Dehydrogenase kinase	ATP binding:GO:0005524;;pyruvate dehydrogenase (acetyl-transferring) kinase activity:GO:0004740	01.01.11 metabolism of the pyruvate family (alanine, isoleucine, leucine, valine) and D-alanine N.crassa	01.01.13 regulation of amino acid metabolism
fgenesh1_pm.10_#_23	fgenesh1_pm.10_#_23	fgenesh1_pm.10_#_23	scaffold_10:60112-61027	5.76301	35.6433	2.62874	0.00881051	yes	130397	IPR010323:Protein of unknown function DUF924, bacterial	-	-	-	-
gm1.6708_g	gm1.6708_g	gm1.6708_g	scaffold_20:42280-43216	88.1429	551.046	2.64426	0.0003095	yes	11152	IPR000342:Regulator of G protein signalling;;IPR000095:PAK-box/P21-Rho-binding;;IPR016137:Regulator of G protein signalling superfamily	-	-	-	signal transducer activity:GO:0004871
fgenesh2_kg.22_#_82_#_gi|30115190|gb|CB900532.1|CB900532	fgenesh2_kg.22_#_82_#_gi|30115190|gb|CB900532.1|CB900532	fgenesh2_kg.22_#_82_#_gi|30115190|gb|CB900532.1|CB900532	scaffold_22:464490-465171	764.221	4786.6	2.64694	0.00200856	yes
gm1.8617_g	gm1.8617_g	gm1.8617_g	scaffold_40:99283-100240	6.12206	38.488	2.65232	0.00551578	yes	13061	-	sp|P76049|YCJY_ECOLI Uncharacterized protein ycjY OS=Escherichia coli (strain K12) GN=ycjY PE=1 SV=2:169.474	-	-	-
estExt_fgenesh2_kg.C_20080	estExt_fgenesh2_kg.C_20080	estExt_fgenesh2_kg.C_20080	scaffold_2:733286-734645	103.549	651.487	2.65343	0.000452536	yes	121962	IPR006088:Sterol desaturase	sp|P53045|ERG25_YEAST C-4 methylsterol oxidase OS=Saccharomyces cerevisiae (strain ATCC 204508 / S288c) GN=ERG25 PE=1 SV=1:369.392	-	KOG0873:C-4 sterol methyl oxidase	metabolic process:GO:0008152;;catalytic activity:GO:0003824;;C-4 methylsterol oxidase activity:GO:0000254	01.06 lipid, fatty acid and isoprenoid metabolism	01.06.05 fatty acid metabolism	01.06.06.11 tetracyclic and pentacyclic triterpenes (cholesterin, steroids and hopanoids) metabolism N.crassa	16.17.09 heavy metal binding (Cu, Fe, Zn)
estExt_fgenesh1_pm.C_280120	estExt_fgenesh1_pm.C_280120	estExt_fgenesh1_pm.C_280120	scaffold_28:375097-378780	32.3595	204.022	2.65646	0.000374612	yes	139111	IPR001412:Aminoacyl-tRNA synthetase, class I, conserved site;;IPR002302:Leucyl-tRNA synthetase, class Ia, bacterial/mitochondrial;;IPR013155:Valyl/Leucyl/Isoleucyl-tRNA synthetase, class I, anticodon-binding;;IPR009008:Valyl/Leucyl/Isoleucyl-tRNA synthetase, class Ia, editing;;IPR015413:Aminoacyl-tRNA synthetase, class I (M);;IPR009080:Aminoacyl-tRNA synthetase, class 1a, anticodon-binding	sp|P15181|SYLM_NEUCR Leucyl-tRNA synthetase, mitochondrial OS=Neurospora crassa GN=leu-5 PE=3 SV=1:1201.42	6.1.1.4:Leucine--tRNA ligase.	KOG0435:Leucyl-tRNA synthetase	cytoplasm:GO:0005737;;tRNA aminoacylation for protein translation:GO:0006418;;translation:GO:0006412;;aminoacyl-tRNA ligase activity:GO:0004812;;leucyl-tRNA aminoacylation:GO:0006429;;nucleotide binding:GO:0000166;;ATP binding:GO:0005524;;leucine-tRNA ligase activity:GO:0004823	11.02.03 mRNA synthesis	11.04.03.01 splicing	12.10 aminoacyl-tRNA-synthetases	16.03.03 RNA binding	16.19.03 ATP binding
estExt_fgenesh1_pm.C_2_t10096	estExt_fgenesh1_pm.C_2_t10096	estExt_fgenesh1_pm.C_2_t10096	scaffold_2:293620-296275	27.4031	177.134	2.69243	0.000228144	yes	135773	IPR001030:Aconitase/3-isopropylmalate dehydratase large subunit, alpha/beta/alpha;;IPR004430:3-isopropylmalate dehydratase, large subunit region;;IPR015928:Aconitase/3-isopropylmalate dehydratase, swivel;;IPR004431:3-isopropylmalate dehydratase, small subunit region;;IPR000573:Aconitase A/isopropylmalate dehydratase small subunit, swivel;;IPR012235:3-isopropylmalate dehydratase, fused small/large…	sp|P55251|LEUC_RHIPU 3-isopropylmalate dehydratase OS=Rhizomucor pusillus GN=LEUA PE=3 SV=1:1033.09	4.2.1.33:3-isopropylmalate dehydratase.	KOG0454:3-isopropylmalate dehydratase (aconitase superfamily)	metabolic process:GO:0008152;;3-isopropylmalate dehydratase activity:GO:0003861;;4 iron, 4 sulfur cluster binding:GO:0051539;;leucine biosynthetic process:GO:0009098;;3-isopropylmalate dehydratase complex:GO:0009316	01.01.11.04.01 biosynthesis of leucine	01.01.11.04.02 degradation of leucine
fgenesh1_pg.3_#_401	fgenesh1_pg.3_#_401	fgenesh1_pg.3_#_401	scaffold_3:1492063-1492804	5.77159	37.8428	2.71298	0.00742225	yes	33523	IPR016040:NAD(P)-binding;;IPR002347:Glucose/ribitol dehydrogenase;;IPR002198:Short-chain dehydrogenase/reductase SDR	sp|P50161|VER1_ASPPA Versicolorin reductase OS=Aspergillus parasiticus GN=ver1 PE=3 SV=2:168.703	1.1.1.100:3-oxoacyl-[acyl-carrier protein] reductase.	KOG0725:Reductases with broad range of substrate specificities	metabolic process:GO:0008152;;3-oxoacyl-[acyl-carrier-protein] reductase activity:GO:0004316;;catalytic activity:GO:0003824;;binding:GO:0005488;;oxidoreductase activity:GO:0016491	01.05 C-compound and carbohydrate metabolism	01.05.02.07 sugar, glucoside, polyol and carboxylate catabolism B.subtilis	01.06 lipid, fatty acid and isoprenoid metabolism L.innocua	01.06.02.02 glycolipid metabolism	01.06.05 fatty acid metabolism	01.20.01.05 metabolism of sugar alcohols	01.20.15 metabolism of derivatives of dehydroquinic acid, shikimic acid and chorismic acid B.subtilis	01.20.15.01 metabolism of naphthoquinone, anthraquinone N.crassa	01.20.35.01.01 metabolism of melanins	02.07 pentose-phosphate pathway	32.05.05 virulence, disease factors	16.01 protein binding	16.21.07 NAD/NADP binding
estExt_Genewise1Plus.C_560018	estExt_Genewise1Plus.C_560018	estExt_Genewise1Plus.C_560018	scaffold_56:18294-19722	16.9867	113.505	2.74027	0.000315974	yes	105289	IPR013750:GHMP kinase, C-terminal;;IPR000870:Homoserine kinase;;IPR006203:GHMP kinase, ATP-binding, conserved site;;IPR006204:GHMP kinase	sp|P17423|KHSE_YEAST Homoserine kinase OS=Saccharomyces cerevisiae (strain ATCC 204508 / S288c) GN=THR1 PE=1 SV=4:412.149	2.7.1.39:Homoserine kinase.	KOG1537:Homoserine kinase	ATP binding:GO:0005524;;kinase activity:GO:0016301;;phosphorylation:GO:0016310;;threonine metabolic process:GO:0006566;;homoserine kinase activity:GO:0004413	01.01.06.04.01 biosynthesis of threonine	01.01.06.05 metabolism of methionine	01.01.09.02 metabolism of serine	01.01.11.02 metabolism of isoleucine	01.04 phosphate metabolism
estExt_fgenesh1_pm.C_210085	estExt_fgenesh1_pm.C_210085	estExt_fgenesh1_pm.C_210085	scaffold_21:277495-278606	51.9492	355.892	2.77627	0.000133621	yes	138652	IPR007533:Cytochrome c oxidase assembly protein CtaG/Cox11	sp|P19516|COX11_YEAST Cytochrome c oxidase assembly protein COX11, mitochondrial OS=Saccharomyces cerevisiae (strain ATCC 204508 / S288c) GN=COX11 PE=2 SV=2:228.409	-	KOG2540:Cytochrome oxidase assembly factor COX11	copper ion binding:GO:0005507	01.07.01 biosynthesis of vitamins, cofactors, and prosthetic groups S.cerevisiae	02.11.05 accessory proteins of electron transport and membrane-associated energy conservation N.crassa	02.13.03 aerobic respiration	14.10 assembly of protein complexes	42.01 cell wall	16.01 protein binding	16.17.09 heavy metal binding (Cu, Fe, Zn)
estExt_Genewise1Plus.C_260208	estExt_Genewise1Plus.C_260208	estExt_Genewise1Plus.C_260208	scaffold_26:249606-250384	6.56856	47.1836	2.84464	0.00298848	yes	103648	IPR008984:SMAD/FHA domain;;IPR000253:Forkhead-associated	-	-	-	-
e_gw1.6.1283.1	e_gw1.6.1283.1	e_gw1.6.1283.1	scaffold_6:312185-313112	58.2149	423.141	2.86168	7.75611e-05	yes	77033	IPR004810:Formyltetrahydrofolate deformylase;;IPR002376:Formyl transferase, N-terminal;;IPR002912:Amino acid-binding ACT	sp|Q46339|PURU_CORS1 Formyltetrahydrofolate deformylase OS=Corynebacterium sp. (strain P-1) GN=purU PE=3 SV=1:311.227	3.5.1.10:Formyltetrahydrofolate deformylase.	KOG3076:5'-phosphoribosylglycinamide formyltransferase	amino acid binding:GO:0016597;;metabolic process:GO:0008152;;hydroxymethyl-, formyl- and related transferase activity:GO:0016742;;biosynthetic process:GO:0009058;;formyltetrahydrofolate deformylase activity:GO:0008864;;'de novo' IMP biosynthetic process:GO:0006189	01.03.01 purin nucleotide/nucleoside/nucleobase metabolism N.crassa	01.03.01.03 purine nucleotide/nucleoside/nucleobase anabolism B.subtilis
estExt_Genewise1Plus.C_12_t10438	estExt_Genewise1Plus.C_12_t10438	estExt_Genewise1Plus.C_12_t10438	scaffold_12:628619-630043	27.046	198.432	2.87516	9.15775e-05	yes	100531	IPR000583:Glutamine amidotransferase, class-II;;IPR012280:Semialdehyde dehydrogenase, dimerisation region;;IPR000534:Semialdehyde dehydrogenase, NAD-binding;;IPR016040:NAD(P)-binding;;IPR005676:Aspartate-semialdehyde dehydrogenase, peptidoglycan lacking;;IPR000319:Aspartate-semialdehyde dehydrogenase, conserved site;;IPR012080:Aspartate-semialdehyde dehydrogenase	sp|P78780|DHAS_SCHPO Probable aspartate-semialdehyde dehydrogenase OS=Schizosaccharomyces pombe (strain ATCC 38366 / 972) GN=SPCC1827.06c PE=1 SV=2:419.853	1.2.1.11:Aspartate-semialdehyde dehydrogenase.	KOG4777:Aspartate-semialdehyde dehydrogenase	cytoplasm:GO:0005737;;NAD binding:GO:0051287;;amino acid metabolic process:GO:0006520;;threonine biosynthetic process:GO:0009088;;metabolic process:GO:0008152;;amino acid biosynthetic process:GO:0008652;;aspartate-semialdehyde dehydrogenase activity:GO:0004073;;methionine biosynthetic process:GO:0009086;;catalytic activity:GO:0003824;;oxidoreductase activity, acting on the aldehyde or oxo group o…	01.01.06 metabolism of the aspartate family	01.01.06.04 metabolism of threonine	01.01.06.05 metabolism of methionine	01.01.06.06.01 biosynthesis of lysine	01.01.06.06.01.01 diaminopimelic acid pathway	01.01.09.02 metabolism of serine
estExt_Genemark1.C_2_t10497	estExt_Genemark1.C_2_t10497	estExt_Genemark1.C_2_t10497	scaffold_2:1818551-1819220	5.74265	42.5904	2.89074	0.00431607	yes
fgenesh2_kg.2_#_203_#_gi|30121670|gb|CB907012.1|CB907012	fgenesh2_kg.2_#_203_#_gi|30121670|gb|CB907012.1|CB907012	fgenesh2_kg.2_#_203_#_gi|30121670|gb|CB907012.1|CB907012	scaffold_2:1354579-1355051	571.498	4249.98	2.89463	0.000141355	yes
fgenesh1_pm.9_#_47	fgenesh1_pm.9_#_47	fgenesh1_pm.9_#_47	scaffold_9:113604-114693	52.4726	406.215	2.95261	4.22345e-05	yes	130101	IPR002680:Alternative oxidase	sp|Q9C206|AOX_PODAN Alternative oxidase, mitochondrial OS=Podospora anserina GN=AOX1 PE=3 SV=1:475.322	1.-.-.-:Oxidoreductases.	-	F420H2 dehydrogenase activity:GO:0043738;;regulation of oxidoreductase activity:GO:0051341;;sulfur oxygenase reductase activity:GO:0043826;;respiratory gaseous exchange:GO:0007585;;malolactic enzyme activity:GO:0043883;;mitochondrial envelope:GO:0005740	02.13 respiration	02.13.03 aerobic respiration
gm1.943_g	gm1.943_g	gm1.943_g	scaffold_1:3353095-3354979	7.10749	55.24	2.9583	0.000143996	yes	5387	IPR007114:Major facilitator superfamily;;IPR011701:Major facilitator superfamily MFS-1;;IPR016196:MFS general substrate transporter	sp|O43081|YHS6_SCHPO Uncharacterized MFS-type transporter C947.06c OS=Schizosaccharomyces pombe (strain ATCC 38366 / 972) GN=SPBC947.06c PE=2 SV=1:181.8	-	KOG0255:Synaptic vesicle transporter SVOP and related transporters (major facilitator superfamily)	transporter activity:GO:0005215;;integral to membrane:GO:0016021;;transport:GO:0006810	20.01.27 drug/toxin transport	32.07 detoxification
estExt_fgenesh1_pm.C_2_t10242	estExt_fgenesh1_pm.C_2_t10242	estExt_fgenesh1_pm.C_2_t10242	scaffold_2:820368-822817	71.6653	566.49	2.9827	0.000119805	yes	135838	IPR007114:Major facilitator superfamily;;IPR011701:Major facilitator superfamily MFS-1;;IPR016196:MFS general substrate transporter;;IPR001958:Tetracycline resistance protein, TetA	sp|P25351|YCR3_YEAST Uncharacterized membrane protein YCR023C OS=Saccharomyces cerevisiae (strain ATCC 204508 / S288c) GN=YCR023C PE=1 SV=2:237.654	-	KOG2615:Permease of the major facilitator superfamily	tetracycline:hydrogen antiporter activity:GO:0015520;;transporter activity:GO:0005215;;integral to membrane:GO:0016021;;transport:GO:0006810;;response to antibiotic:GO:0046677;;tetracycline transport:GO:0015904	32.07 detoxification	20.03 transport facilities
estExt_Genemark1.C_270027	estExt_Genemark1.C_270027	estExt_Genemark1.C_270027	scaffold_27:99023-101058	20.3691	161.11	2.9836	3.74968e-05	yes	26543	IPR013057:Amino acid transporter, transmembrane	sp|P38680|MTR_NEUCR N amino acid transport system protein OS=Neurospora crassa GN=mtr PE=3 SV=2:63.1586	-	KOG1303:Amino acid transporters	-
estExt_Genewise1.C_18_t10296	estExt_Genewise1.C_18_t10296	estExt_Genewise1.C_18_t10296	scaffold_18:407048-409532	45.4036	367.009	3.01494	3.8138e-05	yes	113813	IPR004165:Coenzyme A transferase;;IPR004164:Coenzyme A transferase active site;;IPR014388:3-oxoacid CoA-transferase;;IPR012792:3-oxoacid CoA-transferase, subunit A;;IPR012791:3-oxoacid CoA-transferase, subunit B	sp|Q29551|SCOT1_PIG Succinyl-CoA:3-ketoacid-coenzyme A transferase 1, mitochondrial OS=Sus scrofa GN=OXCT1 PE=1 SV=1:495.738	2.8.3.5:3-oxoacid CoA-transferase.	KOG3822:Succinyl-CoA:alpha-ketoacid-CoA transferase	3-oxoacid CoA-transferase activity:GO:0008260;;CoA-transferase activity:GO:0008410;;metabolic process:GO:0008152	01.05 C-compound and carbohydrate metabolism	02.19 metabolism of energy reserves (e.g. glycogen, trehalose) &nbsp;
estExt_Genewise1.C_5_t20292	estExt_Genewise1.C_5_t20292	estExt_Genewise1.C_5_t20292	scaffold_5:978722-980745	25.0881	205.624	3.03494	2.44888e-05	yes	109136	IPR003042:Aromatic-ring hydroxylase;;IPR013698:Squalene epoxidase;;IPR006076:FAD dependent oxidoreductase	sp|Q92206|ERG1_CANAL Squalene monooxygenase OS=Candida albicans GN=ERG1 PE=3 SV=1:341.273	1.14.99.7:Squalene monooxygenase.	KOG1298:Squalene monooxygenase	metabolic process:GO:0008152;;squalene monooxygenase activity:GO:0004506;;oxidoreductase activity:GO:0016491	01.06 lipid, fatty acid and isoprenoid metabolism	01.06.06.09 triterpenes metabolism	01.06.06.11 tetracyclic and pentacyclic triterpenes (cholesterin, steroids and hopanoids) metabolism N.crassa	01.20.13 metabolism of derivatives of homoisopentenyl pyrophosphate A.thaliana	20.01.15 electron transport	16.21.05 FAD/FMN binding
fgenesh1_pg.20_#_27	fgenesh1_pg.20_#_27	fgenesh1_pg.20_#_27	scaffold_20:95039-96479	9.39383	84.9506	3.17684	3.73199e-05	yes	37894	-	sp|Q9UUE3|YNZ6_SCHPO Putative lysine N-acyltransferase C17G9.06c OS=Schizosaccharomyces pombe (strain ATCC 38366 / 972) GN=SPBC17G9.06c PE=2 SV=1:188.734	-	-	-
estExt_Genewise1Plus.C_12_t20038	estExt_Genewise1Plus.C_12_t20038	estExt_Genewise1Plus.C_12_t20038	scaffold_12:757758-759090	103.383	964.083	3.22116	1.60691e-05	yes	100583	IPR000757:Glycoside hydrolase, family 16;;IPR008985:Concanavalin A-like lectin/glucanase	sp|P23903|E13B_BACCI Glucan endo-1,3-beta-glucosidase A1 OS=Bacillus circulans GN=glcA PE=1 SV=1:92.4337	-	-	hydrolase activity, hydrolyzing O-glycosyl compounds:GO:0004553;;carbohydrate metabolic process:GO:0005975	01.05.03 polysaccharide metabolism
gw1.12.186.1	gw1.12.186.1	gw1.12.186.1	scaffold_12:789920-791390	1.93376	18.55	3.26193	0.000819969	yes	46613	IPR007219:Fungal specific transcription factor;;IPR001138:Fungal transcriptional regulatory protein, N-terminal	sp|O59741|YN25_SCHPO Uncharacterized transcriptional regulatory protein C530.05 OS=Schizosaccharomyces pombe (strain ATCC 38366 / 972) GN=SPBC530.05 PE=2 SV=1:89.7373	-	-	regulation of transcription, DNA-dependent:GO:0006355;;nucleus:GO:0005634;;zinc ion binding:GO:0008270;;transcription:GO:0006350;;DNA binding:GO:0003677;;transcription factor activity:GO:0003700
fgenesh1_pg.15_#_86	fgenesh1_pg.15_#_86	fgenesh1_pg.15_#_86	scaffold_15:364166-365796	20.2106	200.856	3.31298	5.26731e-06	yes	37010	-	sp|Q6U1Z4|CMT1_CRYNE Alpha-1,3-mannosyltransferase CMT1 OS=Cryptococcus neoformans GN=CMT1 PE=1 SV=1:172.555	-	KOG2133:Transcriptional corepressor Atrophin-1/DRPLA	-	01.05 C-compound and carbohydrate metabolism	14.07.02.01 O-directed glycosylation, deglycosylation N.crassa
fgenesh2_kg.30_#_72_#_gi|38135990|gb|CF881308.1|CF881308	fgenesh2_kg.30_#_72_#_gi|38135990|gb|CF881308.1|CF881308	fgenesh2_kg.30_#_72_#_gi|38135990|gb|CF881308.1|CF881308	scaffold_30:270338-270688	74.9677	795.69	3.40786	1.36645e-05	yes
estExt_fgenesh2_kg.C_50010	estExt_fgenesh2_kg.C_50010	estExt_fgenesh2_kg.C_50010	scaffold_5:150975-151619	2.64557	28.62	3.43537	0.00256719	yes
fgenesh1_pm.10_#_279	fgenesh1_pm.10_#_279	fgenesh1_pm.10_#_279	scaffold_10:986977-987494	102.019	1145.35	3.48887	1.48141e-06	yes
e_gw1.19.218.1	e_gw1.19.218.1	e_gw1.19.218.1	scaffold_19:165439-166141	19.1857	223.927	3.54492	5.4051e-06	yes	86288	-	sp|Q9HDU7|YHE8_SCHPO UPF0643 protein PB2B2.08 OS=Schizosaccharomyces pombe (strain ATCC 38366 / 972) GN=SPBPB2B2.08 PE=3 SV=1:139.043	-	-	-
fgenesh1_pm.3_#_75	fgenesh1_pm.3_#_75	fgenesh1_pm.3_#_75	scaffold_3:222538-223687	3.666	42.8042	3.54547	5.4859e-05	yes
estExt_fgenesh1_pg.C_1_t20079	estExt_fgenesh1_pg.C_1_t20079	estExt_fgenesh1_pg.C_1_t20079	scaffold_1:2260612-2261790	23.2723	284.904	3.61379	7.02812e-07	yes	139847	IPR004254:Hly-III related proteins	sp|Q09749|ADRL_SCHPO ADIPOR-like receptor spbc12c2.09c OS=Schizosaccharomyces pombe (strain ATCC 38366 / 972) GN=SPBC12C2.09c PE=2 SV=1:251.906	-	KOG0748:Predicted membrane proteins, contain hemolysin III domain	integral to membrane:GO:0016021	01.04 phosphate metabolism	01.04.04 regulation of phosphate metabolism	01.06 lipid, fatty acid and isoprenoid metabolism S.cerevisiae	01.06.10 regulation of lipid, fatty acid and isoprenoid metabolism N.crassa	02.25 oxidation of fatty acids	11.02.03.04.01 transcription activation	34.01.01.01 homeostasis of metal ions (Na, K, Ca etc.) S.cerevisiae	34.11.03 chemoperception and response	34.11.12 perception of nutrients and nutritional adaptation &nbsp;	16.01 protein binding	16.17 metal binding
gw1.4.642.1	gw1.4.642.1	gw1.4.642.1	scaffold_4:207940-209448	2.00565	25.1363	3.64763	9.98007e-05	yes	53261	IPR001138:Fungal transcriptional regulatory protein, N-terminal	sp|Q12151|UPC2_YEAST Sterol uptake control protein 2 OS=Saccharomyces cerevisiae (strain ATCC 204508 / S288c) GN=UPC2 PE=1 SV=1:63.5438	-	-	regulation of transcription, DNA-dependent:GO:0006355;;nucleus:GO:0005634;;zinc ion binding:GO:0008270;;transcription factor activity:GO:0003700
fgenesh1_pm.12_#_10	fgenesh1_pm.12_#_10	fgenesh1_pm.12_#_10	scaffold_12:25473-28282	59.6959	816.967	3.77457	7.13428e-07	yes	130968	IPR013216:Methyltransferase type 11;;IPR001395:Aldo/keto reductase	-	-	-	metabolic process:GO:0008152;;methyltransferase activity:GO:0008168;;oxidoreductase activity:GO:0016491	01.06 lipid, fatty acid and isoprenoid metabolism N.crassa
fgenesh1_pm.26_#_116	fgenesh1_pm.26_#_116	fgenesh1_pm.26_#_116	scaffold_26:356654-360448	3.72294	52.5252	3.81849	6.16226e-07	yes	133770	IPR005139:PCRF;;IPR011701:Major facilitator superfamily MFS-1;;IPR016196:MFS general substrate transporter;;IPR000352:Class I peptide chain release factor	sp|Q09691|RF1M_SCHPO Putative peptide chain release factor 1, mitochondrial OS=Schizosaccharomyces pombe (strain ATCC 38366 / 972) GN=SPAC2F7.17 PE=2 SV=1:244.202	-	KOG2726:Mitochondrial polypeptide chain release factor	translational termination:GO:0006415;;translation release factor activity:GO:0003747	12.04.03 translation termination
fgenesh1_pg.14_#_164	fgenesh1_pg.14_#_164	fgenesh1_pg.14_#_164	scaffold_14:646556-648479	3.63727	51.3797	3.82027	1.44208e-06	yes	36885	IPR011707:Multicopper oxidase, type 3;;IPR011706:Multicopper oxidase, type 2;;IPR001117:Multicopper oxidase, type 1;;IPR002355:Multicopper oxidase, copper-binding site;;IPR008972:Cupredoxin	sp|Q96WM9|LAC2_BOTFU Laccase-2 OS=Botryotinia fuckeliana GN=lcc2 PE=2 SV=1:339.732	1.10.3.2:Laccase.	KOG1263:Multicopper oxidases	copper ion binding:GO:0005507;;oxidoreductase activity:GO:0016491;;laccase activity:GO:0008471	01.05.11.04 aromate anabolism	01.05.11.07.01 aerobic aromate catabolism	01.25.09 extracellular lignin degradation	32.07.09 detoxification by degradation
fgenesh1_pm.16_#_83	fgenesh1_pm.16_#_83	fgenesh1_pm.16_#_83	scaffold_16:268135-270097	0.835566	13.5107	4.0152	3.2549e-05	yes
estExt_fgenesh2_kg.C_60065	estExt_fgenesh2_kg.C_60065	estExt_fgenesh2_kg.C_60065	scaffold_6:615096-616247	24.9993	438.749	4.13344	1.55848e-08	yes
e_gw1.3.595.1	e_gw1.3.595.1	e_gw1.3.595.1	scaffold_3:1283572-1284352	2.37971	42.2316	4.14946	1.63241e-05	yes	73635	-	sp|P38256|YBU6_YEAST Uncharacterized protein YBR096W OS=Saccharomyces cerevisiae (strain ATCC 204508 / S288c) GN=YBR096W PE=1 SV=1:56.6102	-	KOG4366:Predicted thioesterase	-
gm1.8372_g	gm1.8372_g	gm1.8372_g	scaffold_35:60376-61944	7.7854	139.315	4.16143	2.22503e-08	yes	12816	IPR013027:FAD-dependent pyridine nucleotide-disulphide oxidoreductase;;IPR001327:Pyridine nucleotide-disulphide oxidoreductase, NAD-binding region	sp|Q55CD9|NDH_DICDI Probable NADH dehydrogenase OS=Dictyostelium discoideum GN=DDB_G0270104 PE=3 SV=2:265.774	1.6.99.3:NADH dehydrogenase.	KOG2495:NADH-dehydrogenase (ubiquinone)	FAD binding:GO:0050660;;oxidoreductase activity:GO:0016491;;NADH dehydrogenase activity:GO:0003954	02.13 respiration
estExt_Genewise1Plus.C_560025	estExt_Genewise1Plus.C_560025	estExt_Genewise1Plus.C_560025	scaffold_56:24522-25054	12.8056	253.73	4.30845	2.43394e-07	yes	105293	IPR010829:Cerato-platanin	sp|O74238|SNP1_PHANO Protein SnodProt1 OS=Phaeosphaeria nodorum GN=SNOG_13722 PE=2 SV=1:171.785	-	-	-
gm1.3179_g	gm1.3179_g	gm1.3179_g	scaffold_6:420973-422808	2.63682	60.6056	4.52258	1.56781e-08	yes	7623	IPR005828:General substrate transporter;;IPR007114:Major facilitator superfamily;;IPR003663:Sugar transporter;;IPR016196:MFS general substrate transporter;;IPR005829:Sugar transporter, conserved site	sp|P53387|KHT2_KLULA Hexose transporter 2 OS=Kluyveromyces lactis (strain ATCC 8585 / CBS 2359 / DSM 70799 / NBRC 1267 / NRRL Y-1140 / WM37) GN=KHT2 PE=3 SV=1:410.609	5.3.1.4:L-arabinose isomerase.	KOG0254:Predicted transporter (major facilitator superfamily)	sugar:hydrogen symporter activity:GO:0005351;;L-arabinose isomerase activity:GO:0008733;;carbohydrate transport:GO:0008643;;transporter activity:GO:0005215;;integral to membrane:GO:0016021;;transport:GO:0006810;;membrane:GO:0016020	01.05 C-compound and carbohydrate metabolism	01.05.25 regulation of C-compound and carbohydrate metabolism N.crassa	20.01.03 C-compound and carbohydrate transport	20.01.03.01 sugar transport	20.09.16 cellular export and secretion	20.09.18 cellular import	20.09.18.07 non-vesicular cellular import	34.11.12 perception of nutrients and nutritional adaptation N.crassa	20.03 transport facilities
e_gw1.30.282.1	e_gw1.30.282.1	e_gw1.30.282.1	scaffold_30:334956-340867	0.659713	18.3955	4.80137	1.39958e-09	yes	90904	IPR014031:Beta-ketoacyl synthase, C-terminal;;IPR016035:Acyl transferase/acyl hydrolase/lysophospholipase;;IPR016036:Malonyl-CoA ACP transacylase, ACP-binding;;IPR016039:Thiolase-like;;IPR006162:Phosphopantetheine attachment site;;IPR006163:Phosphopantetheine-binding;;IPR009081:Acyl carrier protein-like;;IPR014043:Acyl transferase;;IPR014030:Beta-ketoacyl synthase, N-terminal	sp|Q03149|WA_EMENI Conidial yellow pigment biosynthesis polyketide synthase OS=Emericella nidulans GN=wA PE=1 SV=2:1044.65	-	KOG1202:Animal-type fatty acid synthase and related proteins	phosphopantetheine binding:GO:0031177;;metabolic process:GO:0008152;;cofactor binding:GO:0048037;;catalytic activity:GO:0003824;;binding:GO:0005488
estExt_fgenesh1_pm.C_210043	estExt_fgenesh1_pm.C_210043	estExt_fgenesh1_pm.C_210043	scaffold_21:153332-155343	8.04189	239.119	4.89405	3.14935e-11	yes	138633	IPR000109:TGF-beta receptor, type I/II extracellular region;;IPR016196:MFS general substrate transporter	sp|P32901|PTR2_YEAST Peptide transporter PTR2 OS=Saccharomyces cerevisiae (strain ATCC 204508 / S288c) GN=PTR2 PE=1 SV=2:461.07	-	KOG1237:H+/oligopeptide symporter	oligopeptide transport:GO:0006857;;transporter activity:GO:0005215;;membrane:GO:0016020	20.01.09 peptide transport	20.09 transport routes	20.09.18 cellular import	20.03 transport facilities
gm1.642_g	gm1.642_g	gm1.642_g	scaffold_1:2333011-2333648	10.5184	314.086	4.90017	6.55262e-05	yes
estExt_Genewise1Plus.C_2_t30349	estExt_Genewise1Plus.C_2_t30349	estExt_Genewise1Plus.C_2_t30349	scaffold_2:1703033-1705190	2.07678	74.6123	5.167	3.72196e-11	yes	95741	IPR007114:Major facilitator superfamily;;IPR011701:Major facilitator superfamily MFS-1;;IPR016196:MFS general substrate transporter	sp|Q7Z9I0|YHA8_SCHPO Uncharacterized MFS-type transporter C409.08 OS=Schizosaccharomyces pombe (strain ATCC 38366 / 972) GN=SPBC409.08 PE=2 SV=1:417.927	-	KOG0255:Synaptic vesicle transporter SVOP and related transporters (major facilitator superfamily)	transporter activity:GO:0005215;;integral to membrane:GO:0016021;;transport:GO:0006810	20.01.11 amine / polyamine transport	20.01.27 drug/toxin transport	32.07 detoxification	32.07.05 detoxification by export	20.03.02.03.01 proton driven antiporter
estExt_Genemark1.C_60029	estExt_Genemark1.C_60029	estExt_Genemark1.C_60029	scaffold_6:105768-107402	8.85171	332.892	5.23295	1.84053e-12	yes	24454	IPR013057:Amino acid transporter, transmembrane	sp|P38680|MTR_NEUCR N amino acid transport system protein OS=Neurospora crassa GN=mtr PE=3 SV=2:540.806	-	KOG1303:Amino acid transporters	-	20.01.07 amino acid/amino acid derivatives transport N.crassa	34.11.12 perception of nutrients and nutritional adaptation N.crassa
estExt_fgenesh1_pm.C_280122	estExt_fgenesh1_pm.C_280122	estExt_fgenesh1_pm.C_280122	scaffold_28:383528-384230	0.92731	45.519	5.61727	1.56781e-08	yes
e_gw1.19.204.1	e_gw1.19.204.1	e_gw1.19.204.1	scaffold_19:437300-438504	0.767384	66.5787	6.43897	3.97645e-12	yes	86627	IPR001926:Pyridoxal phosphate-dependent enzyme, beta subunit;;IPR005965:1-aminocyclopropane-1-carboxylate deaminase	sp|Q5KMX3|1A1D_CRYNE Probable 1-aminocyclopropane-1-carboxylate deaminase OS=Cryptococcus neoformans GN=CNB00190 PE=3 SV=1:410.994	-	-	pyridoxal phosphate binding:GO:0030170;;metabolic process:GO:0008152;;L-vinylglycine deaminase activity:GO:0034100;;amine catabolic process:GO:0009310;;catalytic activity:GO:0003824;;1-aminocyclopropane-1-carboxylate deaminase activity:GO:0008660	01.05 C-compound and carbohydrate metabolism
e_gw1.28.246.1	e_gw1.28.246.1	e_gw1.28.246.1	scaffold_28:407802-409392	0.930759	161.773	7.44135	0	yes	90357	IPR007114:Major facilitator superfamily;;IPR011701:Major facilitator superfamily MFS-1;;IPR016196:MFS general substrate transporter	sp|Q08777|MCH5_YEAST Riboflavin transporter MCH5 OS=Saccharomyces cerevisiae (strain ATCC 204508 / S288c) GN=MCH5 PE=1 SV=1:159.458	-	KOG2504:Monocarboxylate transporter	transporter activity:GO:0005215;;integral to membrane:GO:0016021;;transport:GO:0006810	20.01.03 C-compound and carbohydrate transport	20.09.18.07 non-vesicular cellular import	20.03 transport facilities
[truncated: 2 more columns]
