# Supplementary material for: RNA Sequencing Reveals Xyr1 as a Transcription Factor Regulating Gene Expression beyond Carbohydrate Metabolism
Source: Hindawi journal article supplement (doi:10.1155/2016/4841756), 2016-01-01
Supplement: f1 [file 4841756.f1.zip › addition files/Table S6. intersection of Δxyr1 (lignocellulose)-Rut-C30 (lignocellulose) and Δxyr1 (glucose)-Rut-30 (glucose).xlsx]

## Sheet: Sheet1
Model	gene_id	gene	locus	log2(fold_change(Δxyr1_glucose/Rut-C30_glucose))	log2(fold_change(Rut-C30_lignocellulose/Δxyr1_lignocellulose))	FDR_value	significant	Protein ID	IPRScan	SPROT	KEGG	KOG	GO	Funcat2
estExt_fgenesh2_kg.C_300009	estExt_fgenesh2_kg.C_300009	estExt_fgenesh2_kg.C_300009	scaffold_30:45338-47357	-2.68286	10.8384	0	yes	125125	IPR001722:Glycoside hydrolase, family 7;;IPR000254:Cellulose-binding region, fungal;;IPR008985:Concanavalin A-like lectin/glucanase	sp|P62694|GUX1_TRIRE Exoglucanase 1 OS=Trichoderma reesei GN=cbh1 PE=1 SV=1:991.875	-	KOG4562:Uncharacterized conserved protein (tumor-rejection antigen MAGE in humans)	cellulose binding:GO:0030248;;hydrolase activity, hydrolyzing O-glycosyl compounds:GO:0004553;;carbohydrate metabolic process:GO:0005975;;extracellular region:GO:0005576	01.05.03 polysaccharide metabolism
estExt_fgenesh2_kg.C_30202	estExt_fgenesh2_kg.C_30202	estExt_fgenesh2_kg.C_30202	scaffold_3:1882163-1884078	-3.17322	10.6842	0	yes	122470	IPR001524:Glycoside hydrolase, family 6;;IPR016288:1, 4-beta cellobiohydrolase;;IPR000254:Cellulose-binding region, fungal	sp|P07987|GUX2_TRIRE Exoglucanase 2 OS=Trichoderma reesei GN=cbh2 PE=1 SV=1:959.518	-	-	cellulose binding:GO:0030248;;hydrolase activity, hydrolyzing O-glycosyl compounds:GO:0004553;;carbohydrate metabolic process:GO:0005975;;extracellular region:GO:0005576	01.05 C-compound and carbohydrate metabolism	01.05.02.07 sugar, glucoside, polyol and carboxylate catabolism N.crassa	01.05.03 polysaccharide metabolism
estExt_fgenesh1_pm.C_190177	estExt_fgenesh1_pm.C_190177	estExt_fgenesh1_pm.C_190177	scaffold_19:569288-571762	-3.2325	10.2131	0	yes	138519	IPR005828:General substrate transporter;;IPR007114:Major facilitator superfamily;;IPR003663:Sugar transporter;;IPR016196:MFS general substrate transporter;;IPR005829:Sugar transporter, conserved site	sp|Q4U3U6|QAY_NEUAF Quinate permease OS=Neurospora africana GN=qa-y PE=3 SV=1:270.396	5.3.1.4:L-arabinose isomerase.	KOG0254:Predicted transporter (major facilitator superfamily)	sugar:hydrogen symporter activity:GO:0005351;;L-arabinose isomerase activity:GO:0008733;;carbohydrate transport:GO:0008643;;transporter activity:GO:0005215;;integral to membrane:GO:0016021;;transport:GO:0006810;;membrane:GO:0016020	20.01.03 C-compound and carbohydrate transport	20.09.18.07 non-vesicular cellular import
estExt_Genewise1Plus.C_300040	estExt_Genewise1Plus.C_300040	estExt_Genewise1Plus.C_300040	scaffold_30:34984-36773	-2.28365	8.73037	0	yes	104220	IPR007117:Pollen allergen/expansin, C-terminal;;IPR000254:Cellulose-binding region, fungal;;IPR009009:Barwin-related endoglucanase;;IPR007112:Expansin 45, endoglucanase-like	sp|Q40638|EXPB1_ORYSJ Expansin-B1 OS=Oryza sativa subsp. japonica GN=EXPB1a PE=1 SV=2:64.6994	-	KOG4157:beta-1,6-N-acetylglucosaminyltransferase, contains WSC domain	cellulose binding:GO:0030248;;hydrolase activity, hydrolyzing O-glycosyl compounds:GO:0004553;;carbohydrate metabolic process:GO:0005975;;extracellular region:GO:0005576
estExt_Genewise1Plus.C_1_t50314	estExt_Genewise1Plus.C_1_t50314	estExt_Genewise1Plus.C_1_t50314	scaffold_1:2952734-2954260	-2.95409	5.67427	0	yes	94809	IPR001395:Aldo/keto reductase	sp|Q876L8|XYL1_TRIRE NAD(P)H-dependent D-xylose reductase xyl1 OS=Trichoderma reesei GN=xyl1 PE=3 SV=1:676.011	1.1.1.179:D-xylose 1-dehydrogenase (NADP+).	KOG1577:Aldo/keto reductase family proteins	oxidoreductase activity:GO:0016491;;D-xylose 1-dehydrogenase (NADP+) activity:GO:0047837	01.05 C-compound and carbohydrate metabolism	01.05.02 sugar, glucoside, polyol and carboxylate metabolism	01.05.02.07 sugar, glucoside, polyol and carboxylate catabolism S.cerevisiae	01.05.03 polysaccharide metabolism	01.06 lipid, fatty acid and isoprenoid metabolism	01.06.06 isoprenoid metabolism	01.06.06.11 tetracyclic and pentacyclic triterpenes (cholesterin, steroids and hopanoids) metabolism	01.07 metabolism of vitamins, cofactors, and prosthetic groups	01.20 secondary metabolism	01.20.17.09 metabolism of alkaloids	02.16 fermentation	32.01.03 osmotic and salt stress response	32.01.05 heat shock response	32.10 degradation / modification of foreign (exogenous) compounds	34.11.03.13 osmosensing	16.21.07 NAD/NADP binding
fgenesh1_pm.12_#_10	fgenesh1_pm.12_#_10	fgenesh1_pm.12_#_10	scaffold_12:25473-28282	3.77457	3.28324	3.70871e-14	yes	130968	IPR013216:Methyltransferase type 11;;IPR001395:Aldo/keto reductase	-	-	-	metabolic process:GO:0008152;;methyltransferase activity:GO:0008168;;oxidoreductase activity:GO:0016491	01.06 lipid, fatty acid and isoprenoid metabolism N.crassa
estExt_Genewise1Plus.C_5_t10307	estExt_Genewise1Plus.C_5_t10307	estExt_Genewise1Plus.C_5_t10307	scaffold_5:355367-357447	-4.0851	2.61602	7.85188e-12	yes	97308	IPR013027:FAD-dependent pyridine nucleotide-disulphide oxidoreductase;;IPR002938:Monooxygenase, FAD-binding;;IPR001327:Pyridine nucleotide-disulphide oxidoreductase, NAD-binding region;;IPR001100:Pyridine nucleotide-disulphide oxidoreductase, class I	sp|Q9FVQ0|YUC10_ARATH Flavin-containing monooxygenase YUCCA10 OS=Arabidopsis thaliana GN=YUC10 PE=2 SV=1:132.494	-	KOG1399:Flavin-containing monooxygenase	aromatic compound metabolic process:GO:0006725;;FAD binding:GO:0050660;;electron transport:GO:0006118;;monooxygenase activity:GO:0004497;;oxidoreductase activity:GO:0016491
estExt_Genemark1.C_220122	estExt_Genemark1.C_220122	estExt_Genemark1.C_220122	scaffold_22:448807-450049	-2.27509	2.60021	3.96877e-10	yes	26328	IPR001395:Aldo/keto reductase	sp|O43488|ARK72_HUMAN Aflatoxin B1 aldehyde reductase member 2 OS=Homo sapiens GN=AKR7A2 PE=1 SV=3:257.299	1.-.-.-:Oxidoreductases.	KOG1575:Voltage-gated shaker-like K+ channel, subunit beta/KCNAB	F420H2 dehydrogenase activity:GO:0043738;;regulation of oxidoreductase activity:GO:0051341;;sulfur oxygenase reductase activity:GO:0043826;;oxidoreductase activity:GO:0016491;;malolactic enzyme activity:GO:0043883	01.05 C-compound and carbohydrate metabolism	01.05.02.07 sugar, glucoside, polyol and carboxylate catabolism	01.20 secondary metabolism	32.07.03 detoxification by modification
estExt_fgenesh2_kg.C_1_t10451	estExt_fgenesh2_kg.C_1_t10451	estExt_fgenesh2_kg.C_1_t10451	scaffold_1:3185401-3186746	-4.3259	2.24434	1.44111e-05	yes	121828	IPR016040:NAD(P)-binding;;IPR008030:NmrA-like	sp|Q5ZID0|NMRL1_CHICK NmrA-like family domain-containing protein 1 OS=Gallus gallus GN=NMRAL1 PE=2 SV=1:146.747	-	-	metabolic process:GO:0008152;;regulation of nitrogen utilization:GO:0006808;;catalytic activity:GO:0003824;;binding:GO:0005488;;transcription repressor activity:GO:0016564	01.02.07.01 regulation of nitrogen metabolism	11.02.03.04.03 transcription repression
estExt_Genemark1.C_3_t10393	estExt_Genemark1.C_3_t10393	estExt_Genemark1.C_3_t10393	scaffold_3:1403205-1404842	-3.43771	2.14398	2.48165e-05	yes	24069	IPR008979:Galactose-binding like	-	-	KOG1216:von Willebrand factor and related coagulation proteins	-
gw1.21.443.1	gw1.21.443.1	gw1.21.443.1	scaffold_21:505074-507047	-2.62162	1.86555	0.000176699	yes	66301	IPR007114:Major facilitator superfamily;;IPR011701:Major facilitator superfamily MFS-1;;IPR016196:MFS general substrate transporter	sp|Q04301|VBA1_YEAST Vacuolar basic amino acid transporter 1 OS=Saccharomyces cerevisiae (strain ATCC 204508 / S288c) GN=VBA1 PE=1 SV=1:109.768	-	KOG0254:Predicted transporter (major facilitator superfamily)	transporter activity:GO:0005215;;integral to membrane:GO:0016021;;transport:GO:0006810
fgenesh1_pm.2_#_440	fgenesh1_pm.2_#_440	fgenesh1_pm.2_#_440	scaffold_2:1504383-1505857	-2.30696	1.83786	3.42994e-05	yes	127115	IPR017853:Glycoside hydrolase, catalytic core;;IPR001360:Glycoside hydrolase, family 1	sp|Q25BW4|BGL1B_PHACH Beta-glucosidase 1B OS=Phanerochaete chrysosporium GN=BGL1B PE=1 SV=1:500.745	3.2.1.21:Beta-glucosidase.	KOG0626:Beta-glucosidase, lactase phlorizinhydrolase, and related proteins	hydrolase activity, hydrolyzing O-glycosyl compounds:GO:0004553;;carbohydrate metabolic process:GO:0005975;;beta-glucosidase activity:GO:0008422	01.05 C-compound and carbohydrate metabolism	01.05.02.04 sugar, glucoside, polyol and carboxylate anabolism L.innocua	01.05.02.07 sugar, glucoside, polyol and carboxylate catabolism N.crassa	01.05.03 polysaccharide metabolism	01.20.01.07 metabolism of glycosides	02.01 glycolysis and gluconeogenesis	32.05.03 defense related proteins
estExt_Genewise1Plus.C_15_t20071	estExt_Genewise1Plus.C_15_t20071	estExt_Genewise1Plus.C_15_t20071	scaffold_15:742156-743975	-3.12843	1.6183	0.00107354	yes	101532	IPR005828:General substrate transporter;;IPR007114:Major facilitator superfamily;;IPR003663:Sugar transporter;;IPR016196:MFS general substrate transporter;;IPR005829:Sugar transporter, conserved site	sp|Q4U3U4|QAY_NEUTR Quinate permease OS=Neurospora terricola GN=qa-y PE=3 SV=1:825.469	5.3.1.4:L-arabinose isomerase.	KOG0254:Predicted transporter (major facilitator superfamily)	sugar:hydrogen symporter activity:GO:0005351;;L-arabinose isomerase activity:GO:0008733;;carbohydrate transport:GO:0008643;;transporter activity:GO:0005215;;integral to membrane:GO:0016021;;transport:GO:0006810;;membrane:GO:0016020	20.01.03 C-compound and carbohydrate transport	20.09.18.07 non-vesicular cellular import
e_gw1.11.804.1	e_gw1.11.804.1	e_gw1.11.804.1	scaffold_11:91890-93192	-3.05135	1.41093	0.000352314	yes	81893	IPR001395:Aldo/keto reductase;;IPR005399:Potassium channel, voltage-dependent, beta subunit, KCNAB-related	sp|Q40648|KCAB_ORYSJ Probable voltage-gated potassium channel subunit beta OS=Oryza sativa subsp. japonica GN=KOB1 PE=1 SV=2:367.466	1.1.1.91:Aryl-alcohol dehydrogenase (NADP+).	KOG1575:Voltage-gated shaker-like K+ channel, subunit beta/KCNAB	potassium ion transport:GO:0006813;;aryl-alcohol dehydrogenase (NADP+) activity:GO:0047681;;integral to membrane:GO:0016021;;oxidoreductase activity:GO:0016491	01.01 amino acid metabolism	01.01.09.04 metabolism of phenylalanine	01.01.09.05 metabolism of tyrosine	01.05 C-compound and carbohydrate metabolism	01.05.02.07 sugar, glucoside, polyol and carboxylate catabolism B.subtilis	01.06 lipid, fatty acid and isoprenoid metabolism T.acidophilum	01.07.01 biosynthesis of vitamins, cofactors, and prosthetic groups N.crassa	01.20 secondary metabolism	01.20.01.09 metabolism of aminoglycoside antibiotics T.acidophilum	02.01 glycolysis and gluconeogenesis	02.16 fermentation	20.01.01 ion transport	20.01.01.01 cation transport (H+, Na+, K+, Ca2+ , NH4+, etc.)	20.09.18 cellular import	34.01.01 homeostasis of cations	34.01.01.01 homeostasis of metal ions (Na, K, Ca etc.) &nbsp;	16.01 protein binding	16.17.03 potassium binding	16.19.03 ATP binding	16.21.07 NAD/NADP binding	18.02 regulation of protein activity	20.03.01 channel / pore class transport	20.03.01.01 ion channels	20.03.25 ABC transporters
estExt_fgenesh1_pg.C_60164	estExt_fgenesh1_pg.C_60164	estExt_fgenesh1_pg.C_60164	scaffold_6:546356-548051	-2.23004	1.28039	0.00466071	yes	140931	IPR001810:Cyclin-like F-box	-	-	-	-
estExt_fgenesh1_pg.C_3_t10323	estExt_fgenesh1_pg.C_3_t10323	estExt_fgenesh1_pg.C_3_t10323	scaffold_3:1188449-1190916	-3.55268	1.2764	0.00537921	yes	140500	IPR001401:Dynamin, GTPase region	sp|Q6PW23|MX_EPICO Interferon-induced GTP-binding protein Mx OS=Epinephelus coioides GN=mx PE=2 SV=1:151.369	-	KOG0446:Vacuolar sorting protein VPS1, dynamin, and related proteins	GTPase activity:GO:0003924;;GTP binding:GO:0005525;;dynamin GTPase activity:GO:0008549	32.05.01 resistance proteins
estExt_Genewise1Plus.C_15_t10070	estExt_Genewise1Plus.C_15_t10070	estExt_Genewise1Plus.C_15_t10070	scaffold_15:88829-90633	2.53174	1.26469	0.00341966	yes	101318	IPR009049:Argininosuccinate lyase;;IPR000362:Fumarate lyase;;IPR008948:L-Aspartase-like;;IPR003031:Delta crystallin	sp|P50514|ARLZ_SCHPO Probable argininosuccinate lyase OS=Schizosaccharomyces pombe (strain ATCC 38366 / 972) GN=argx PE=2 SV=1:568.54	4.3.2.1:Argininosuccinate lyase.	KOG1316:Argininosuccinate lyase	argininosuccinate lyase activity:GO:0004056;;catalytic activity:GO:0003824;;arginine biosynthetic process via ornithine:GO:0042450	01.01.03.05.01 biosynthesis of arginine	01.01.03.05.02 degradation of arginine	01.01.05.03 metabolism of urea (urea cycle)	01.01.06.01 metabolism of aspartate
estExt_Genewise1Plus.C_260224	estExt_Genewise1Plus.C_260224	estExt_Genewise1Plus.C_260224	scaffold_26:259869-262582	-3.49182	-1.12936	0.00491047	yes	103650	IPR010255:Haem peroxidase;;IPR000763:Catalase-peroxidase haem;;IPR002016:Haem peroxidase, plant/fungal/bacterial	sp|Q2TW34|KATG_ASPOR Catalase-peroxidase OS=Aspergillus oryzae (strain ATCC 42149 / RIB 40) GN=katG PE=3 SV=1:1170.61	1.11.1.11:L-ascorbate peroxidase.	-	L-ascorbate peroxidase activity:GO:0016688;;response to oxidative stress:GO:0006979;;electron transport:GO:0006118;;peroxidase activity:GO:0004601;;heme binding:GO:0020037;;catalase activity:GO:0004096	32.07.07.01 catalase reaction
estExt_Genewise1.C_380094	estExt_Genewise1.C_380094	estExt_Genewise1.C_380094	scaffold_38:96419-99070	2.18659	-1.21949	0.00910802	yes	116453	IPR000447:FAD-dependent glycerol-3-phosphate dehydrogenase;;IPR006076:FAD dependent oxidoreductase	sp|P43304|GPDM_HUMAN Glycerol-3-phosphate dehydrogenase, mitochondrial OS=Homo sapiens GN=GPD2 PE=1 SV=3:572.392	1.1.99.5:Glycerol-3-phosphate dehydrogenase.	KOG0042:Glycerol-3-phosphate dehydrogenase	glycerol-3-phosphate dehydrogenase activity:GO:0004368;;glycerol-3-phosphate dehydrogenase complex:GO:0009331;;glycerol-3-phosphate metabolic process:GO:0006072;;oxidoreductase activity:GO:0016491	01.05.02.07 sugar, glucoside, polyol and carboxylate catabolism	01.06.02.01 phospholipid metabolism	02.01 glycolysis and gluconeogenesis	20.01.15 electron transport	30.01 cellular signalling	30.05.01.12.05 insulin receptor signalling pathway	16.13 C-compound binding	16.17.01 calcium binding	16.21.05 FAD/FMN binding
estExt_Genewise1Plus.C_8_t10446	estExt_Genewise1Plus.C_8_t10446	estExt_Genewise1Plus.C_8_t10446	scaffold_8:573690-574723	-2.97681	-1.24569	0.00490099	yes	98934	-	-	-	KOG0977:Nuclear envelope protein lamin, intermediate filament superfamily	-
gm1.6708_g	gm1.6708_g	gm1.6708_g	scaffold_20:42280-43216	2.64426	-1.26731	0.00264123	yes	11152	IPR000342:Regulator of G protein signalling;;IPR000095:PAK-box/P21-Rho-binding;;IPR016137:Regulator of G protein signalling superfamily	-	-	-	signal transducer activity:GO:0004871
e_gw1.12.485.1	e_gw1.12.485.1	e_gw1.12.485.1	scaffold_12:682367-683615	2.27979	-1.29905	0.0014098	yes	81999	IPR001138:Fungal transcriptional regulatory protein, N-terminal	sp|O93870|FCR1_CANAL Fluconazole resistance protein 1 OS=Candida albicans GN=FCR1 PE=4 SV=1:77.411	-	-	regulation of transcription, DNA-dependent:GO:0006355;;nucleus:GO:0005634;;zinc ion binding:GO:0008270;;transcription factor activity:GO:0003700	11.02.03.04 transcriptional control	32.05.01.03 chemical agent resistance
estExt_Genewise1Plus.C_360043	estExt_Genewise1Plus.C_360043	estExt_Genewise1Plus.C_360043	scaffold_36:53716-54871	2.05816	-1.30988	0.00214833	yes	104664	IPR006088:Sterol desaturase	sp|Q7SBB6|ERG3_NEUCR Probable C-5 sterol desaturase OS=Neurospora crassa GN=NCU06207 PE=3 SV=1:511.531	1.3.-.-:Acting on the CH-CH group of donors.	KOG0872:Sterol C5 desaturase	peptidyl-oxazoline dehydrogenase activity:GO:0018129;;2-hydroxycyclohexane-1-carboxyl-CoA dehydrogenase activity:GO:0018495;;2,6-dihydroxycyclohexane-1-carboxyl-CoA dehydrogenase activity:GO:0018496;;peptidyl-thiazoline dehydrogenase activity:GO:0018136;;metabolic process:GO:0008152;;phytoene dehydrogenase activity:GO:0016166;;1-chloro-2,2-bis(4-chlorophenyl)ethane dehydrogenase activity:GO:00184…	01.06 lipid, fatty acid and isoprenoid metabolism N.crassa	01.06.06.11 tetracyclic and pentacyclic triterpenes (cholesterin, steroids and hopanoids) metabolism S.cerevisiae	16.17.09 heavy metal binding (Cu, Fe, Zn)
gm1.6389_g	gm1.6389_g	gm1.6389_g	scaffold_18:247524-248474	-2.62974	-1.33234	0.00708643	yes	10833	IPR016040:NAD(P)-binding;;IPR002347:Glucose/ribitol dehydrogenase;;IPR002198:Short-chain dehydrogenase/reductase SDR	sp|Q9RPT1|RHLG_PSEAE Rhamnolipids biosynthesis 3-oxoacyl-[acyl-carrier-protein] reductase OS=Pseudomonas aeruginosa GN=rhlG PE=1 SV=1:179.104	1.1.1.100:3-oxoacyl-[acyl-carrier protein] reductase.	KOG0725:Reductases with broad range of substrate specificities	metabolic process:GO:0008152;;3-oxoacyl-[acyl-carrier-protein] reductase activity:GO:0004316;;catalytic activity:GO:0003824;;binding:GO:0005488;;oxidoreductase activity:GO:0016491	01.05 C-compound and carbohydrate metabolism	01.06.02.02 glycolipid metabolism	01.06.05 fatty acid metabolism	01.20.01.05 metabolism of sugar alcohols	01.20.35.01.01 metabolism of melanins
estExt_Genewise1.C_300128	estExt_Genewise1.C_300128	estExt_Genewise1.C_300128	scaffold_30:122505-124706	-6.58431	-1.36638	0.00103468	yes	115868	IPR012132:Glucose-methanol-choline oxidoreductase;;IPR007867:Glucose-methanol-choline oxidoreductase, C-terminal;;IPR000172:Glucose-methanol-choline oxidoreductase, N-terminal	sp|P04841|ALOX_PICAN Alcohol oxidase OS=Pichia angusta GN=MOX PE=3 SV=1:452.981	1.1.99.1:Choline dehydrogenase.	KOG1238:Glucose dehydrogenase/choline dehydrogenase/mandelonitrile lyase (GMC oxidoreductase family)	oxidoreductase activity, acting on CH-OH group of donors:GO:0016614;;FAD binding:GO:0050660;;alcohol metabolic process:GO:0006066;;choline dehydrogenase activity:GO:0008812	01.01.09.01.01 biosynthesis of glycine	01.05 C-compound and carbohydrate metabolism	01.20.17.03 metabolism of amines	20.01.15 electron transport	16.21.05 FAD/FMN binding	16.21.07 NAD/NADP binding
estExt_fgenesh1_pm.C_40040	estExt_fgenesh1_pm.C_40040	estExt_fgenesh1_pm.C_40040	scaffold_4:122367-123752	-2.5354	-1.5188	0.00150801	yes	136351	IPR001585:Transaldolase	sp|B2J2D9|TAL_NOSP7 Transaldolase OS=Nostoc punctiforme (strain ATCC 29133 / PCC 73102) GN=tal PE=3 SV=1:100.138	2.2.1.2:Transaldolase.	KOG2772:Transaldolase	carbohydrate metabolic process:GO:0005975;;transaldolase activity:GO:0004801
fgenesh1_pm.7_#_280	fgenesh1_pm.7_#_280	fgenesh1_pm.7_#_280	scaffold_7:956660-957425	-5.28738	-1.51922	0.0028668	yes	129607	IPR006056:YjgF-like protein;;IPR006175:Endoribonuclease L-PSP;;IPR013813:Endoribonuclease L-PSP/chorismate mutase-like	sp|O58584|Y854_PYRHO RutC family protein PH0854 OS=Pyrococcus horikoshii (strain ATCC 700860 / DSM 12428 / JCM 9974 / NBRC 100139 / OT-3) GN=PH0854 PE=1 SV=2:142.895	-	KOG2317:Putative translation initiation inhibitor UK114/IBM1	-	01.01.11.02.01 biosynthesis of isoleucine	01.03.01 purin nucleotide/nucleoside/nucleobase metabolism L.innocua	11.02.03.04 transcriptional control	32.01 stress response	32.01.05 heat shock response	34.11.03.07 pheromone response, mating-type determination, sex-specific proteins N.crassa	42.16 mitochondrion
estExt_fgenesh1_pg.C_100198	estExt_fgenesh1_pg.C_100198	estExt_fgenesh1_pg.C_100198	scaffold_10:820024-821509	2.33192	-1.53688	0.00500421	yes	141598	IPR014756:Immunoglobulin E-set	sp|Q10347|YDA5_SCHPO Uncharacterized protein C1F12.05 OS=Schizosaccharomyces pombe (strain ATCC 38366 / 972) GN=SPAC1F12.05 PE=2 SV=1:175.637	-	-	-
estExt_fgenesh1_pm.C_280120	estExt_fgenesh1_pm.C_280120	estExt_fgenesh1_pm.C_280120	scaffold_28:375097-378780	2.65646	-1.62543	9.73811e-06	yes	139111	IPR001412:Aminoacyl-tRNA synthetase, class I, conserved site;;IPR002302:Leucyl-tRNA synthetase, class Ia, bacterial/mitochondrial;;IPR013155:Valyl/Leucyl/Isoleucyl-tRNA synthetase, class I, anticodon-binding;;IPR009008:Valyl/Leucyl/Isoleucyl-tRNA synthetase, class Ia, editing;;IPR015413:Aminoacyl-tRNA synthetase, class I (M);;IPR009080:Aminoacyl-tRNA synthetase, class 1a, anticodon-binding	sp|P15181|SYLM_NEUCR Leucyl-tRNA synthetase, mitochondrial OS=Neurospora crassa GN=leu-5 PE=3 SV=1:1201.42	6.1.1.4:Leucine--tRNA ligase.	KOG0435:Leucyl-tRNA synthetase	cytoplasm:GO:0005737;;tRNA aminoacylation for protein translation:GO:0006418;;translation:GO:0006412;;aminoacyl-tRNA ligase activity:GO:0004812;;leucyl-tRNA aminoacylation:GO:0006429;;nucleotide binding:GO:0000166;;ATP binding:GO:0005524;;leucine-tRNA ligase activity:GO:0004823	11.02.03 mRNA synthesis	11.04.03.01 splicing	12.10 aminoacyl-tRNA-synthetases	16.03.03 RNA binding	16.19.03 ATP binding
estExt_fgenesh1_pm.C_2_t10242	estExt_fgenesh1_pm.C_2_t10242	estExt_fgenesh1_pm.C_2_t10242	scaffold_2:820368-822817	2.9827	-1.66556	8.27627e-05	yes	135838	IPR007114:Major facilitator superfamily;;IPR011701:Major facilitator superfamily MFS-1;;IPR016196:MFS general substrate transporter;;IPR001958:Tetracycline resistance protein, TetA	sp|P25351|YCR3_YEAST Uncharacterized membrane protein YCR023C OS=Saccharomyces cerevisiae (strain ATCC 204508 / S288c) GN=YCR023C PE=1 SV=2:237.654	-	KOG2615:Permease of the major facilitator superfamily	tetracycline:hydrogen antiporter activity:GO:0015520;;transporter activity:GO:0005215;;integral to membrane:GO:0016021;;transport:GO:0006810;;response to antibiotic:GO:0046677;;tetracycline transport:GO:0015904	32.07 detoxification	20.03 transport facilities
fgenesh1_pg.12_#_70	fgenesh1_pg.12_#_70	fgenesh1_pg.12_#_70	scaffold_12:318533-320605	-4.18941	-1.70233	0.000129593	yes	36354	IPR012734:Dihydroxyacetone kinase;;IPR004007:Dak phosphatase;;IPR004006:Dak kinase	sp|O13902|DAK1_SCHPO Dihydroxyacetone kinase 1 OS=Schizosaccharomyces pombe (strain ATCC 38366 / 972) GN=dak1 PE=2 SV=1:525.783	2.7.1.29:Glycerone kinase.	KOG2426:Dihydroxyacetone kinase/glycerone kinase	ATP binding:GO:0005524;;glycerol metabolic process:GO:0006071;;glycerone kinase activity:GO:0004371	01.04 phosphate metabolism	01.05 C-compound and carbohydrate metabolism	01.05.07 C-3 compound metabolism	01.06 lipid, fatty acid and isoprenoid metabolism S.cerevisiae	32.01 stress response	16.19 nucleotide/nucleoside/nucleobase binding	16.19.03 ATP binding
e_gw1.21.284.1	e_gw1.21.284.1	e_gw1.21.284.1	scaffold_21:254239-255622	-3.45233	-1.73468	0.00175268	yes	87321	IPR002155:Thiolase;;IPR016039:Thiolase-like;;IPR013751:3-Oxoacyl-[acyl-carrier-protein (ACP)] synthase III	sp|Q07598|NLTP_CHICK Non-specific lipid-transfer protein (Fragment) OS=Gallus gallus GN=SCP2 PE=2 SV=1:441.425	2.3.1.16:Acetyl-CoA C-acyltransferase.	KOG1406:Peroxisomal 3-ketoacyl-CoA-thiolase P-44/SCP2	metabolic process:GO:0008152;;catalytic activity:GO:0003824;;acetyl-CoA C-acyltransferase activity:GO:0003988	20.01.13 lipid/fatty acid transport	20.09 transport routes	16.09 lipid binding
estExt_Genewise1Plus.C_210056	estExt_Genewise1Plus.C_210056	estExt_Genewise1Plus.C_210056	scaffold_21:53503-54968	2.36466	-1.77309	0.000126276	yes	102759	IPR001260:Coproporphyrinogen III oxidase	sp|P11353|HEM6_YEAST Coproporphyrinogen-III oxidase OS=Saccharomyces cerevisiae (strain ATCC 204508 / S288c) GN=HEM13 PE=1 SV=2:392.504	1.3.3.3:Coproporphyrinogen oxidase.	KOG1518:Coproporphyrinogen III oxidase CPO/HEM13	porphyrin biosynthetic process:GO:0006779;;coproporphyrinogen oxidase activity:GO:0004109	01.07.01 biosynthesis of vitamins, cofactors, and prosthetic groups S.cerevisiae	01.20.19.01 metabolism of porphyrins	16.17.09 heavy metal binding (Cu, Fe, Zn)
fgenesh1_pg.13_#_136	fgenesh1_pg.13_#_136	fgenesh1_pg.13_#_136	scaffold_13:534320-535816	2.17702	-1.89768	2.75226e-06	yes	36636	IPR003780:Cytochrome oxidase assembly	sp|Q10361|ETP1_SCHPO Electron transfer protein 1, mitochondrial OS=Schizosaccharomyces pombe (strain ATCC 38366 / 972) GN=etp1 PE=1 SV=2:400.208	-	KOG2725:Cytochrome oxidase assembly factor COX15	protein complex assembly:GO:0006461;;membrane:GO:0016020	01.07.01 biosynthesis of vitamins, cofactors, and prosthetic groups S.cerevisiae	01.20.19.01 metabolism of porphyrins	02.13 respiration	02.13.03 aerobic respiration	14.10 assembly of protein complexes	16.01 protein binding
estExt_fgenesh1_pm.C_50128	estExt_fgenesh1_pm.C_50128	estExt_fgenesh1_pm.C_50128	scaffold_5:439566-441065	2.17894	-1.95251	1.02675e-06	yes	136573	IPR008333:Oxidoreductase FAD-binding region;;IPR001433:Oxidoreductase FAD/NAD(P)-binding;;IPR001834:NADH:cytochrome b5 reductase (CBR);;IPR009050:Globin-like;;IPR000971:Globin, subset	sp|P49852|HMP_BACSU Flavohemoprotein OS=Bacillus subtilis GN=hmp PE=2 SV=1:296.975	-	KOG3378:Globins and related hemoproteins	nitric oxide dioxygenase activity:GO:0008941;;electron transport:GO:0006118;;oxidoreductase activity:GO:0016491;;heme binding:GO:0020037;;iron ion binding:GO:0005506	01.02 nitrogen, sulfur and selenium metabolism N.crassa	02.13.01 anaerobic respiration	20.01.15 electron transport	32.01 stress response	32.05.01.03 chemical agent resistance
estExt_Genewise1Plus.C_260208	estExt_Genewise1Plus.C_260208	estExt_Genewise1Plus.C_260208	scaffold_26:249606-250384	2.84464	-2.0074	0.000854683	yes	103648	IPR008984:SMAD/FHA domain;;IPR000253:Forkhead-associated	-	-	-	-
fgenesh1_pg.4_#_233	fgenesh1_pg.4_#_233	fgenesh1_pg.4_#_233	scaffold_4:884997-886379	-2.73756	-2.0161	4.08628e-07	yes	33886	IPR017853:Glycoside hydrolase, catalytic core;;IPR001223:Glycoside hydrolase, family 18, catalytic domain;;IPR001579:Glycoside hydrolase, chitinase active site;;IPR011583:Chitinase II	sp|Q1E3R8|CHI1_COCIM Endochitinase 1 OS=Coccidioides immitis (strain RS) GN=CTS1 PE=3 SV=1:194.897	3.2.1.14:Chitinase.	KOG2806:Chitinase	endochitinase activity:GO:0008843;;hydrolase activity, hydrolyzing O-glycosyl compounds:GO:0004553;;carbohydrate metabolic process:GO:0005975;;chitin catabolic process:GO:0006032;;chitinase activity:GO:0004568
estExt_Genewise1Plus.C_390082	estExt_Genewise1Plus.C_390082	estExt_Genewise1Plus.C_390082	scaffold_39:83896-88507	-2.78152	-2.01926	4.09183e-08	yes	104881	IPR003593:AAA+ ATPase, core;;IPR010929:CDR ABC transporter;;IPR013525:ABC-2 type transporter;;IPR003439:ABC transporter-like	sp|P41820|BFR1_SCHPO Brefeldin A resistance protein OS=Schizosaccharomyces pombe (strain ATCC 38366 / 972) GN=bfr1 PE=1 SV=1:1140.95	-	KOG0065:Pleiotropic drug resistance proteins (PDR1-15), ABC superfamily	nucleoside-triphosphatase activity:GO:0017111;;ATP binding:GO:0005524;;integral to membrane:GO:0016021;;transport:GO:0006810;;ATPase activity:GO:0016887;;ATPase activity, coupled to transmembrane movement of substances:GO:0042626;;nucleotide binding:GO:0000166	01.04 phosphate metabolism	01.05 C-compound and carbohydrate metabolism	20.01.01.01 cation transport (H+, Na+, K+, Ca2+ , NH4+, etc.) S.cerevisiae	20.01.03 C-compound and carbohydrate transport	20.01.13 lipid/fatty acid transport	20.01.27 drug/toxin transport	20.09.16.01 Type I protein secretion system (ABC-type transport systems) N.crassa	32.01.01 oxidative stress response	32.05.01.03 chemical agent resistance	32.07 detoxification	32.07.05 detoxification by export	34.01.01.01 homeostasis of metal ions (Na, K, Ca etc.) S.cerevisiae	16.19.03 ATP binding	20.03.22 transport ATPases	20.03.25 ABC transporters
estExt_Genewise1.C_5_t20292	estExt_Genewise1.C_5_t20292	estExt_Genewise1.C_5_t20292	scaffold_5:978722-980745	3.03494	-2.18607	3.74233e-09	yes	109136	IPR003042:Aromatic-ring hydroxylase;;IPR013698:Squalene epoxidase;;IPR006076:FAD dependent oxidoreductase	sp|Q92206|ERG1_CANAL Squalene monooxygenase OS=Candida albicans GN=ERG1 PE=3 SV=1:341.273	1.14.99.7:Squalene monooxygenase.	KOG1298:Squalene monooxygenase	metabolic process:GO:0008152;;squalene monooxygenase activity:GO:0004506;;oxidoreductase activity:GO:0016491	01.06 lipid, fatty acid and isoprenoid metabolism	01.06.06.09 triterpenes metabolism	01.06.06.11 tetracyclic and pentacyclic triterpenes (cholesterin, steroids and hopanoids) metabolism N.crassa	01.20.13 metabolism of derivatives of homoisopentenyl pyrophosphate A.thaliana	20.01.15 electron transport	16.21.05 FAD/FMN binding
fgenesh1_pm.5_#_272	fgenesh1_pm.5_#_272	fgenesh1_pm.5_#_272	scaffold_5:930462-931530	-2.98532	-2.19191	1.1025e-06	yes	128734	IPR007272:Protein of unknown function DUF395, YeeE/YedE	-	-	-	-
estExt_Genewise1.C_330194	estExt_Genewise1.C_330194	estExt_Genewise1.C_330194	scaffold_33:212851-217715	-2.72498	-2.20183	3.11383e-09	yes	116127	IPR004827:Basic-leucine zipper (bZIP) transcription factor;;IPR003593:AAA+ ATPase, core;;IPR010929:CDR ABC transporter;;IPR013525:ABC-2 type transporter;;IPR003439:ABC transporter-like	sp|O74208|PDH1_CANGA ATP-binding cassette transporter CGR1 OS=Candida glabrata (strain ATCC 2001 / CBS 138 / JCM 3761 / NBRC 0622 / NRRL Y-65) GN=PDH1 PE=3 SV=3:1317.75	-	KOG0065:Pleiotropic drug resistance proteins (PDR1-15), ABC superfamily	regulation of transcription, DNA-dependent:GO:0006355;;nucleus:GO:0005634;;nucleoside-triphosphatase activity:GO:0017111;;integral to membrane:GO:0016021;;ATPase activity, coupled to transmembrane movement of substances:GO:0042626;;transcription factor activity:GO:0003700;;nucleotide binding:GO:0000166;;sequence-specific DNA binding:GO:0043565;;ATP binding:GO:0005524;;transport:GO:0006810;;ATPase…	01.04 phosphate metabolism	01.05 C-compound and carbohydrate metabolism	20.01.01.01 cation transport (H+, Na+, K+, Ca2+ , NH4+, etc.) S.cerevisiae	20.01.03 C-compound and carbohydrate transport	20.01.13 lipid/fatty acid transport	20.01.27 drug/toxin transport	20.09.16.01 Type I protein secretion system (ABC-type transport systems) N.crassa	32.01.01 oxidative stress response	32.05.01.03 chemical agent resistance	32.07 detoxification	32.07.05 detoxification by export	34.01.01.01 homeostasis of metal ions (Na, K, Ca etc.) S.cerevisiae	16.19.03 ATP binding	20.03.22 transport ATPases	20.03.25 ABC transporters
fgenesh1_pg.4_#_259	fgenesh1_pg.4_#_259	fgenesh1_pg.4_#_259	scaffold_4:969166-973591	-2.84384	-2.21245	0.000111995	yes	33912	IPR003593:AAA+ ATPase, core;;IPR011527:ABC transporter, transmembrane region, type 1;;IPR001140:ABC transporter, transmembrane region;;IPR003439:ABC transporter-like	sp|P36619|PMD1_SCHPO Leptomycin B resistance protein pmd1 OS=Schizosaccharomyces pombe (strain ATCC 38366 / 972) GN=pmd1 PE=2 SV=2:296.975;;sp|P36619|PMD1_SCHPO Leptomycin B resistance protein pmd1 OS=Schizosaccharomyces pombe (strain ATCC 38366 / 972) GN=pmd1 PE=2 SV=2:857.055	-	KOG0055:Multidrug/pheromone exporter, ABC superfamily	nucleoside-triphosphatase activity:GO:0017111;;ATP binding:GO:0005524;;integral to membrane:GO:0016021;;ATPase activity:GO:0016887;;transport:GO:0006810;;nucleotide binding:GO:0000166;;ATPase activity, coupled to transmembrane movement of substances:GO:0042626	01.04 phosphate metabolism	20.01.01.01 cation transport (H+, Na+, K+, Ca2+ , NH4+, etc.)	20.01.03 C-compound and carbohydrate transport	20.01.09 peptide transport	20.01.27 drug/toxin transport	20.09.16 cellular export and secretion	20.09.16.01 Type I protein secretion system (ABC-type transport systems) N.crassa	32.05.01 resistance proteins	32.07.05 detoxification by export	34.11.03 chemoperception and response	34.11.03.07 pheromone response, mating-type determination, sex-specific proteins S.cerevisiae	16.19 nucleotide/nucleoside/nucleobase binding	16.19.03 ATP binding	20.03 transport facilities	20.03.22 transport ATPases	20.03.25 ABC transporters
estExt_fgenesh2_kg.C_70036	estExt_fgenesh2_kg.C_70036	estExt_fgenesh2_kg.C_70036	scaffold_7:276935-278354	2.18007	-2.2462	3.98519e-08	yes	123006	IPR008551:Protein of unknown function DUF833	sp|Q6ICL3|CV025_HUMAN Uncharacterized protein C22orf25 OS=Homo sapiens GN=C22orf25 PE=2 SV=1:92.8189	-	KOG2342:Uncharacterized conserved protein	-
fgenesh1_pm.4_#_91	fgenesh1_pm.4_#_91	fgenesh1_pm.4_#_91	scaffold_4:285578-290519	-4.6833	-2.33172	1.81841e-08	yes	128094	IPR003609:Apple-like;;IPR003014:N/apple PAN;;IPR001189:Manganese and iron superoxide dismutase	-	3.2.1.3:Glucan 1,4-alpha-glucosidase.	KOG4701:Chitinase	glucan 1,4-alpha-glucosidase activity:GO:0004339;;metal ion binding:GO:0046872;;superoxide metabolic process:GO:0006801;;superoxide dismutase activity:GO:0004784
gm1.8617_g	gm1.8617_g	gm1.8617_g	scaffold_40:99283-100240	2.65232	-2.35361	0.00019562	yes	13061	-	sp|P76049|YCJY_ECOLI Uncharacterized protein ycjY OS=Escherichia coli (strain K12) GN=ycjY PE=1 SV=2:169.474	-	-	-
fgenesh1_pm.7_#_279	fgenesh1_pm.7_#_279	fgenesh1_pm.7_#_279	scaffold_7:955291-956287	-3.53553	-2.49196	2.04632e-05	yes	129606	IPR002220:Dihydrodipicolinate synthetase	sp|Q5BD77|HOGA1_EMENI Probable 4-hydroxy-2-oxoglutarate aldolase, mitochondrial OS=Emericella nidulans GN=AN1503 PE=1 SV=1:313.538	-	-	lyase activity:GO:0016829;;metabolic process:GO:0008152	01.01.05.03 metabolism of urea (urea cycle)	01.01.06.06.01 biosynthesis of lysine	01.01.06.06.01.01 diaminopimelic acid pathway
e_gw1.4.1160.1	e_gw1.4.1160.1	e_gw1.4.1160.1	scaffold_4:952917-957177	-2.44041	-2.84781	0	yes	73914	IPR003593:AAA+ ATPase, core;;IPR010929:CDR ABC transporter;;IPR013525:ABC-2 type transporter;;IPR003439:ABC transporter-like	sp|P53756|PDR18_YEAST ABC transporter ATP-binding protein/permease PDR18 OS=Saccharomyces cerevisiae (strain ATCC 204508 / S288c) GN=PDR18 PE=2 SV=1:987.252	-	KOG0065:Pleiotropic drug resistance proteins (PDR1-15), ABC superfamily	nucleoside-triphosphatase activity:GO:0017111;;ATP binding:GO:0005524;;integral to membrane:GO:0016021;;transport:GO:0006810;;ATPase activity:GO:0016887;;ATPase activity, coupled to transmembrane movement of substances:GO:0042626;;nucleotide binding:GO:0000166	01.04 phosphate metabolism	01.05 C-compound and carbohydrate metabolism	20.01.01.01 cation transport (H+, Na+, K+, Ca2+ , NH4+, etc.) S.cerevisiae	20.01.03 C-compound and carbohydrate transport	20.01.13 lipid/fatty acid transport	20.01.27 drug/toxin transport	20.09.16.01 Type I protein secretion system (ABC-type transport systems) N.crassa	32.01.01 oxidative stress response	32.05.01.03 chemical agent resistance	32.07 detoxification	32.07.05 detoxification by export	34.01.01.01 homeostasis of metal ions (Na, K, Ca etc.) S.cerevisiae	16.19.03 ATP binding	20.03.22 transport ATPases	20.03.25 ABC transporters
estExt_Genewise1Plus.C_19_t10325	estExt_Genewise1Plus.C_19_t10325	estExt_Genewise1Plus.C_19_t10325	scaffold_19:419441-420969	2.52896	-3.15264	0	yes	102433	IPR008333:Oxidoreductase FAD-binding region;;IPR001433:Oxidoreductase FAD/NAD(P)-binding;;IPR009050:Globin-like;;IPR000971:Globin, subset	sp|Q7TTP0|HMP_BORPE Flavohemoprotein OS=Bordetella pertussis GN=hmp PE=3 SV=1:317.775	-	KOG3378:Globins and related hemoproteins	nitric oxide dioxygenase activity:GO:0008941;;electron transport:GO:0006118;;oxidoreductase activity:GO:0016491;;heme binding:GO:0020037;;iron ion binding:GO:0005506	01.02 nitrogen, sulfur and selenium metabolism N.crassa	02.13.01 anaerobic respiration	20.01.15 electron transport	32.01 stress response	32.05.01.03 chemical agent resistance
