# Supplementary material for: RNA Sequencing Reveals Xyr1 as a Transcription Factor Regulating Gene Expression beyond Carbohydrate Metabolism
Source: Hindawi journal article supplement (doi:10.1155/2016/4841756), 2016-01-01
Supplement: f1 [file 4841756.f1.zip › addition files/Table S7. Rut-C30 (glucose)-and-Rut-C30 (lignocellulose)-DE.tbl-Funcation.xlsx]

## Sheet: G30-and-C30-DE.tbl-Funcation
Model	gene_id	gene	locus	FPKM_Rut-C30_glucose	FPKM_Rut-C30_lignocellulose	log2(fold_change(Rut-C30_lignocellulose/Rut-C30_glucose))	FDR_value	significant	Protein ID	IPRScan	SPROT	KEGG	KOG	GO	Funcat2
fgenesh1_pg.3_#_336	fgenesh1_pg.3_#_336	fgenesh1_pg.3_#_336	scaffold_3:1244020-1244608	12.3862	1	-3.63066	0.000951014	yes	33458	-	-	-	KOG0401:Translation initiation factor 4F, ribosome/mRNA-bridging subunit (eIF-4G)	-
estExt_Genemark1.C_60015	estExt_Genemark1.C_60015	estExt_Genemark1.C_60015	scaffold_6:47167-48558	1	13.9951	3.80685	5.52e-06	yes	24449	IPR000209:Peptidase S8 and S53, subtilisin, kexin, sedolisin;;IPR010259:Proteinase inhibitor I9, subtilisin propeptide;;IPR009020:Proteinase inhibitor, propeptide	sp|Q03420|ALP_TRIAT Alkaline proteinase OS=Trichoderma atroviride GN=prb1 PE=1 SV=1:719.153	3.4.21.-:Serine endopeptidases.	KOG1153:Subtilisin-related protease/Vacuolar protease B	identical protein binding:GO:0042802;;serine-type signal peptidase activity:GO:0008991;;proprotein convertase activity:GO:0016808;;proteolysis:GO:0006508;;negative regulation of catalytic activity:GO:0043086;;pancreatic elastase activity:GO:0008132;;plasminogen activator activity:GO:0008243;;subtilase activity:GO:0004289	14.07.11 protein processing (proteolytic)	14.13 protein/peptide degradation	14.13.04 lysosomal and vacuolar protein degradation S.cerevisiae
estExt_Genewise1.C_11_t20192	estExt_Genewise1.C_11_t20192	estExt_Genewise1.C_11_t20192	scaffold_11:863241-864137	1	9.11495	3.18823	0.00216066	yes
estExt_Genewise1Plus.C_2_t20346	estExt_Genewise1Plus.C_2_t20346	estExt_Genewise1Plus.C_2_t20346	scaffold_2:1050443-1053036	1	44.9431	5.49003	1.54e-08	yes	95463	IPR002889:Carbohydrate-binding WSC;;IPR013994:Carbohydrate-binding WSC, subgroup;;IPR008985:Concanavalin A-like lectin/glucanase	sp|Q2UIE6|EGLX_ASPOR Probable endo-1,3(4)-beta-glucanase AO090023000083 OS=Aspergillus oryzae (strain ATCC 42149 / RIB 40) GN=AO090023000083 PE=3 SV=1:267.314	-	KOG1187:Serine/threonine protein kinase	-
fgenesh1_pm.4_#_189	fgenesh1_pm.4_#_189	fgenesh1_pm.4_#_189	scaffold_4:626299-626717	1	10.49	3.39094	0.006126	yes
gm1.5304_g	gm1.5304_g	gm1.5304_g	scaffold_13:205958-206327	1	10.158	3.34454	0.0033825	yes
e_gw1.24.392.1	e_gw1.24.392.1	e_gw1.24.392.1	scaffold_24:488054-488824	0.266469	484.831	10.8293	6.24e-12	yes	88887	IPR008262:Lipase, active site;;IPR000675:Cutinase	sp|Q99034|AXE1_TRIRE Acetylxylan esterase OS=Trichoderma reesei GN=axe1 PE=1 SV=1:312.768	-	-	metabolic process:GO:0008152;;hydrolase activity:GO:0016787;;catalytic activity:GO:0003824	01.05.03 polysaccharide metabolism	16.05 polysaccharide binding
estExt_fgenesh2_kg.C_30102	estExt_fgenesh2_kg.C_30102	estExt_fgenesh2_kg.C_30102	scaffold_3:818061-819609	0.0907808	152.895	10.7179	1.64e-11	yes	122377	IPR017853:Glycoside hydrolase, catalytic core;;IPR001547:Glycoside hydrolase, family 5;;IPR000254:Cellulose-binding region, fungal	sp|Q2TXJ2|MANA_ASPOR Probable mannan endo-1,4-beta-mannosidase A OS=Aspergillus oryzae (strain ATCC 42149 / RIB 40) GN=manA PE=3 SV=1:444.891	-	-	cellulose binding:GO:0030248;;hydrolase activity, hydrolyzing O-glycosyl compounds:GO:0004553;;carbohydrate metabolic process:GO:0005975;;extracellular region:GO:0005576
estExt_fgenesh1_pg.C_1_t10122	estExt_fgenesh1_pg.C_1_t10122	estExt_fgenesh1_pg.C_1_t10122	scaffold_1:516918-518027	1.03799	1607.74	10.597	0	yes	139631	IPR008262:Lipase, active site;;IPR000254:Cellulose-binding region, fungal;;IPR000675:Cutinase	sp|Q99034|AXE1_TRIRE Acetylxylan esterase OS=Trichoderma reesei GN=axe1 PE=1 SV=1:610.527	-	-	metabolic process:GO:0008152;;cellulose binding:GO:0030248;;hydrolase activity, hydrolyzing O-glycosyl compounds:GO:0004553;;carbohydrate metabolic process:GO:0005975;;hydrolase activity:GO:0016787;;catalytic activity:GO:0003824;;extracellular region:GO:0005576	01.05.03 polysaccharide metabolism	16.05 polysaccharide binding
estExt_fgenesh2_kg.C_540002	estExt_fgenesh2_kg.C_540002	estExt_fgenesh2_kg.C_540002	scaffold_54:22710-24150	0.280924	431.928	10.5864	0	yes	125575	IPR000254:Cellulose-binding region, fungal	sp|P49075|GUX3_AGABI Exoglucanase 3 OS=Agaricus bisporus GN=cel3 PE=1 SV=1:77.411	-	-	cellulose binding:GO:0030248;;hydrolase activity, hydrolyzing O-glycosyl compounds:GO:0004553;;carbohydrate metabolic process:GO:0005975;;extracellular region:GO:0005576
e_gw1.33.40.1	e_gw1.33.40.1	e_gw1.33.40.1	scaffold_33:41673-43456	0.155784	193.318	10.2772	0	yes	91594	IPR005828:General substrate transporter;;IPR007114:Major facilitator superfamily;;IPR003663:Sugar transporter;;IPR016196:MFS general substrate transporter;;IPR005829:Sugar transporter, conserved site	sp|P38156|MAL31_YEAST Maltose permease MAL31 OS=Saccharomyces cerevisiae (strain ATCC 204508 / S288c) GN=MAL31 PE=1 SV=1:380.178	5.3.1.4:L-arabinose isomerase.	KOG0254:Predicted transporter (major facilitator superfamily)	sugar:hydrogen symporter activity:GO:0005351;;L-arabinose isomerase activity:GO:0008733;;carbohydrate transport:GO:0008643;;transporter activity:GO:0005215;;integral to membrane:GO:0016021;;transport:GO:0006810;;membrane:GO:0016020	01.05 C-compound and carbohydrate metabolism	20.01.03 C-compound and carbohydrate transport	20.01.03.01 sugar transport	20.09.18 cellular import	20.09.18.07 non-vesicular cellular import	20.03 transport facilities	20.03.02.02.01 proton driven symporter
estExt_Genemark1.C_2_t10124	estExt_Genemark1.C_2_t10124	estExt_Genemark1.C_2_t10124	scaffold_2:415654-417264	0.403148	476.61	10.2073	0	yes	23616	IPR017853:Glycoside hydrolase, catalytic core;;IPR001000:Glycoside hydrolase, family 10	sp|P23360|XYNA_THEAU Endo-1,4-beta-xylanase OS=Thermoascus aurantiacus GN=XYNA PE=1 SV=4:420.239	-	-	hydrolase activity, hydrolyzing O-glycosyl compounds:GO:0004553;;carbohydrate metabolic process:GO:0005975	01.05.03 polysaccharide metabolism	16.05 polysaccharide binding
estExt_fgenesh2_kg.C_40049	estExt_fgenesh2_kg.C_40049	estExt_fgenesh2_kg.C_40049	scaffold_4:810379-811560	1.60882	1683.48	10.0312	0	yes	122518	IPR008957:Fibronectin, type III-like fold;;IPR005103:Glycoside hydrolase, family 61	sp|Q7Z9M7|GUN7_TRIRE Endoglucanase-7 OS=Trichoderma reesei GN=cel61b PE=1 SV=1:509.99	-	-	-	01.05.02.07 sugar, glucoside, polyol and carboxylate catabolism N.crassa	01.05.03 polysaccharide metabolism	01.25.01 extracellular polysaccharide degradation N.crassa
estExt_fgenesh2_kg.C_150101	estExt_fgenesh2_kg.C_150101	estExt_fgenesh2_kg.C_150101	scaffold_15:750693-751235	3.0748	2695.08	9.77562	0	yes
gm1.8554_g	gm1.8554_g	gm1.8554_g	scaffold_39:33320-34130	0.187862	152.594	9.6658	1.43e-09	yes	12998	-	-	-	KOG3158:HSP90 co-chaperone p23	-
fgenesh1_pm.11_#_14	fgenesh1_pm.11_#_14	fgenesh1_pm.11_#_14	scaffold_11:35046-36692	0.590379	470.076	9.63704	0	yes	130681	IPR011009:Protein kinase-like	-	-	KOG1216:von Willebrand factor and related coagulation proteins	-
estExt_fgenesh2_kg.C_1_t10058	estExt_fgenesh2_kg.C_1_t10058	estExt_fgenesh2_kg.C_1_t10058	scaffold_1:519729-520907	2.31651	1426.88	9.2667	0	yes	121449	IPR000254:Cellulose-binding region, fungal	sp|P19355|GUX1_TRIVI Exoglucanase 1 OS=Trichoderma viride GN=cbh1 PE=3 SV=2:85.8853	-	-	cellulose binding:GO:0030248;;hydrolase activity, hydrolyzing O-glycosyl compounds:GO:0004553;;carbohydrate metabolic process:GO:0005975;;extracellular region:GO:0005576
estExt_fgenesh2_kg.C_260030	estExt_fgenesh2_kg.C_260030	estExt_fgenesh2_kg.C_260030	scaffold_26:300331-301211	6.25189	3589.63	9.16533	0	yes	124931	IPR001137:Glycoside hydrolase, family 11;;IPR008985:Concanavalin A-like lectin/glucanase	sp|P36217|XYN2_TRIRE Endo-1,4-beta-xylanase 2 OS=Trichoderma reesei GN=xyn2 PE=1 SV=1:422.55	-	-	hydrolase activity, hydrolyzing O-glycosyl compounds:GO:0004553;;carbohydrate metabolic process:GO:0005975	01.05 C-compound and carbohydrate metabolism	01.05.02.07 sugar, glucoside, polyol and carboxylate catabolism N.crassa	32.10.07 degradation / modification of foreign (exogenous) polysaccharides N.crassa
e_gw1.54.21.1	e_gw1.54.21.1	e_gw1.54.21.1	scaffold_54:26168-27626	0.281664	153.901	9.09382	0	yes	93498	IPR017853:Glycoside hydrolase, catalytic core;;IPR001139:Glycoside hydrolase, family 30	sp|Q45070|XYNC1_BACSU Glucuronoxylanase xynC OS=Bacillus subtilis GN=xynC PE=1 SV=1:63.5438	3.2.1.45:Glucosylceramidase.	KOG2566:Beta-glucocerebrosidase	lysosome:GO:0005764;;lysosome organization and biogenesis:GO:0007040;;sphingolipid metabolic process:GO:0006665;;glucosylceramidase activity:GO:0004348
estExt_fgenesh1_pg.C_50028	estExt_fgenesh1_pg.C_50028	estExt_fgenesh1_pg.C_50028	scaffold_5:98718-101150	2.83143	1517.14	9.06561	0	yes	140746	IPR001764:Glycoside hydrolase, family 3, N-terminal;;IPR002772:Glycoside hydrolase, family 3, C-terminal;;IPR017853:Glycoside hydrolase, catalytic core	sp|Q4WRB0|XYND_ASPFU Probable exo-1,4-beta-xylosidase xlnD OS=Neosartorya fumigata (strain ATCC MYA-4609 / Af293 / CBS 101355 / FGSC A1100) GN=xlnD PE=2 SV=1:1124	3.2.1.21:Beta-glucosidase.	-	hydrolase activity, hydrolyzing O-glycosyl compounds:GO:0004553;;carbohydrate metabolic process:GO:0005975;;beta-glucosidase activity:GO:0008422	01.05 C-compound and carbohydrate metabolism	01.05.03 polysaccharide metabolism	42.01 cell wall
estExt_Genewise1.C_340008	estExt_Genewise1.C_340008	estExt_Genewise1.C_340008	scaffold_34:2729-9681	0.170234	85.7577	8.97661	0	yes	116130	IPR014031:Beta-ketoacyl synthase, C-terminal;;IPR016035:Acyl transferase/acyl hydrolase/lysophospholipase;;IPR016039:Thiolase-like;;IPR006163:Phosphopantetheine-binding;;IPR014043:Acyl transferase;;IPR001031:Thioesterase;;IPR016036:Malonyl-CoA ACP transacylase, ACP-binding;;IPR006162:Phosphopantetheine attachment site;;IPR014030:Beta-ketoacyl synthase, N-terminal;;IPR009081:Acyl carrier protein-l…	sp|Q03149|WA_EMENI Conidial yellow pigment biosynthesis polyketide synthase OS=Emericella nidulans GN=wA PE=1 SV=2:1956.41	-	KOG1202:Animal-type fatty acid synthase and related proteins	phosphopantetheine binding:GO:0031177;;metabolic process:GO:0008152;;cofactor binding:GO:0048037;;catalytic activity:GO:0003824;;biosynthetic process:GO:0009058;;binding:GO:0005488;;hydrolase activity, acting on ester bonds:GO:0016788
fgenesh2_kg.4_#_2_#_AAP57750.1	fgenesh2_kg.4_#_2_#_AAP57750.1	fgenesh2_kg.4_#_2_#_AAP57750.1	scaffold_4:59251-60220	0.146859	70.0139	8.89707	3.55e-08	yes	118070	IPR005193:Glycoside hydrolase, family 62	sp|Q2U7D2|AXHA_ASPOR Probable alpha-L-arabinofuranosidase axhA OS=Aspergillus oryzae (strain ATCC 42149 / RIB 40) GN=axhA PE=3 SV=1:480.715	-	-	-
e_gw1.3.1006.1	e_gw1.3.1006.1	e_gw1.3.1006.1	scaffold_3:1861288-1862724	3.15747	1382.16	8.77394	0	yes	72489	IPR017853:Glycoside hydrolase, catalytic core;;IPR001547:Glycoside hydrolase, family 5;;IPR000254:Cellulose-binding region, fungal	sp|P07982|GUN2_TRIRE Endoglucanase EG-II OS=Trichoderma reesei GN=egl2 PE=1 SV=1:845.884	-	-	cellulose binding:GO:0030248;;hydrolase activity, hydrolyzing O-glycosyl compounds:GO:0004553;;carbohydrate metabolic process:GO:0005975;;extracellular region:GO:0005576
gm1.860_g	gm1.860_g	gm1.860_g	scaffold_1:3108857-3110364	1.03277	399.161	8.59431	0	yes	5304	IPR001722:Glycoside hydrolase, family 7;;IPR000254:Cellulose-binding region, fungal;;IPR008985:Concanavalin A-like lectin/glucanase	sp|P07981|GUN1_TRIRE Endoglucanase EG-1 OS=Trichoderma reesei GN=egl1 PE=1 SV=1:934.48	-	-	cellulose binding:GO:0030248;;hydrolase activity, hydrolyzing O-glycosyl compounds:GO:0004553;;carbohydrate metabolic process:GO:0005975;;extracellular region:GO:0005576	01.05.03 polysaccharide metabolism
estExt_fgenesh2_kg.C_190036	estExt_fgenesh2_kg.C_190036	estExt_fgenesh2_kg.C_190036	scaffold_19:272795-273415	6.74755	2452.34	8.50558	0	yes
estExt_Genewise1Plus.C_350017	estExt_Genewise1Plus.C_350017	estExt_Genewise1Plus.C_350017	scaffold_35:23877-25343	0.197664	69.3441	8.45458	5.35e-14	yes	104564	IPR001969:Peptidase aspartic, active site;;IPR001461:Peptidase A1;;IPR009007:Peptidase aspartic, catalytic	sp|O13340|CARP_PODAN Podosporapepsin OS=Podospora anserina GN=PAPA PE=2 SV=1:297.36	3.4.23.18:Aspergillopepsin I.	KOG1339:Aspartyl protease	aspartic-type endopeptidase activity:GO:0004190;;pepsin A activity:GO:0004194;;proteolysis:GO:0006508	01.25.03 extracellular protein degradation	14.13 protein/peptide degradation	14.13.04 lysosomal and vacuolar protein degradation N.crassa	42.27 extracellular / secretion proteins
fgenesh1_pm.33_#_16	fgenesh1_pm.33_#_16	fgenesh1_pm.33_#_16	scaffold_33:37305-39735	0.207384	71.828	8.4361	0	yes	134448	IPR017853:Glycoside hydrolase, catalytic core;;IPR000322:Glycoside hydrolase, family 31	sp|P31434|XYLS_ECOLI Alpha-xylosidase OS=Escherichia coli (strain K12) GN=yicI PE=1 SV=2:665.996	3.2.1.20:Alpha-glucosidase.	KOG1065:Maltase glucoamylase and related hydrolases, glycosyl hydrolase family 31	hydrolase activity, hydrolyzing O-glycosyl compounds:GO:0004553;;carbohydrate metabolic process:GO:0005975;;alpha-glucosidase activity:GO:0004558
estExt_Genewise1Plus.C_340014	estExt_Genewise1Plus.C_340014	estExt_Genewise1Plus.C_340014	scaffold_34:12608-14881	0.937638	257.654	8.10219	0	yes	104519	IPR011707:Multicopper oxidase, type 3;;IPR011706:Multicopper oxidase, type 2;;IPR001117:Multicopper oxidase, type 1;;IPR002355:Multicopper oxidase, copper-binding site;;IPR008972:Cupredoxin	sp|P17489|LAC1_EMENI Laccase-1 OS=Emericella nidulans GN=yA PE=2 SV=3:434.491	1.10.3.3:L-ascorbate oxidase.	KOG1263:Multicopper oxidases	L-ascorbate oxidase activity:GO:0008447;;copper ion binding:GO:0005507;;oxidoreductase activity:GO:0016491	01.07.04 utilization of vitamins, cofactors, and prosthetic groups A.thaliana
estExt_Genewise1Plus.C_1_t10173	estExt_Genewise1Plus.C_1_t10173	estExt_Genewise1Plus.C_1_t10173	scaffold_1:229005-229800	3.60003	834.245	7.85632	0	yes	93769	-	sp|P40092|SPI1_YEAST Uncharacterized cell wall protein SPI1 OS=Saccharomyces cerevisiae (strain ATCC 204508 / S288c) GN=SPI1 PE=2 SV=1:68.5514	-	-	-
fgenesh1_pg.6_#_144	fgenesh1_pg.6_#_144	fgenesh1_pg.6_#_144	scaffold_6:469810-470245	4.43998	950.832	7.74249	0	yes	34569	IPR010636:Hydrophobin 2	sp|Q9UVI4|THYD_CLAFS Trihydrophobin OS=Claviceps fusiformis GN=TH1 PE=1 SV=1:57.3806;;sp|Q9UVI4|THYD_CLAFS Trihydrophobin OS=Claviceps fusiformis GN=TH1 PE=1 SV=1:53.1434	-	-	cell communication:GO:0007154;;cell wall:GO:0005618;;extracellular region:GO:0005576
fgenesh1_pg.3_#_508	fgenesh1_pg.3_#_508	fgenesh1_pg.3_#_508	scaffold_3:1826016-1828000	0.410061	86.8839	7.72711	0	yes	33630	IPR005828:General substrate transporter;;IPR007114:Major facilitator superfamily;;IPR003663:Sugar transporter;;IPR016196:MFS general substrate transporter;;IPR005829:Sugar transporter, conserved site	sp|P49374|HGT1_KLULA High-affinity glucose transporter OS=Kluyveromyces lactis (strain ATCC 8585 / CBS 2359 / DSM 70799 / NBRC 1267 / NRRL Y-1140 / WM37) GN=HGT1 PE=3 SV=1:480.33	5.3.1.4:L-arabinose isomerase.	KOG0254:Predicted transporter (major facilitator superfamily)	sugar:hydrogen symporter activity:GO:0005351;;L-arabinose isomerase activity:GO:0008733;;carbohydrate transport:GO:0008643;;transporter activity:GO:0005215;;integral to membrane:GO:0016021;;transport:GO:0006810;;membrane:GO:0016020	20.01.03 C-compound and carbohydrate transport	20.09.18.07 non-vesicular cellular import
estExt_fgenesh2_kg.C_190032	estExt_fgenesh2_kg.C_190032	estExt_fgenesh2_kg.C_190032	scaffold_19:256723-257402	1.67384	352.743	7.71931	0	yes	124438	IPR002594:Glycoside hydrolase, family 12;;IPR008985:Concanavalin A-like lectin/glucanase	sp|P22669|GUN_ASPAC Endoglucanase-1 OS=Aspergillus aculeatus PE=1 SV=1:214.927	-	-	polysaccharide catabolic process:GO:0000272;;cellulase activity:GO:0008810
estExt_fgenesh2_kg.C_30202	estExt_fgenesh2_kg.C_30202	estExt_fgenesh2_kg.C_30202	scaffold_3:1882163-1884078	13.0161	2516.11	7.59476	0	yes	122470	IPR001524:Glycoside hydrolase, family 6;;IPR016288:1, 4-beta cellobiohydrolase;;IPR000254:Cellulose-binding region, fungal	sp|P07987|GUX2_TRIRE Exoglucanase 2 OS=Trichoderma reesei GN=cbh2 PE=1 SV=1:959.518	-	-	cellulose binding:GO:0030248;;hydrolase activity, hydrolyzing O-glycosyl compounds:GO:0004553;;carbohydrate metabolic process:GO:0005975;;extracellular region:GO:0005576	01.05 C-compound and carbohydrate metabolism	01.05.02.07 sugar, glucoside, polyol and carboxylate catabolism N.crassa	01.05.03 polysaccharide metabolism
e_gw1.30.20.1	e_gw1.30.20.1	e_gw1.30.20.1	scaffold_30:31290-32879	6.56238	1238.87	7.56059	0	yes	90847	IPR017853:Glycoside hydrolase, catalytic core;;IPR001139:Glycoside hydrolase, family 30	sp|Q45070|XYNC1_BACSU Glucuronoxylanase xynC OS=Bacillus subtilis GN=xynC PE=1 SV=1:68.5514	3.2.1.45:Glucosylceramidase.	KOG2566:Beta-glucocerebrosidase	lysosome:GO:0005764;;lysosome organization and biogenesis:GO:0007040;;sphingolipid metabolic process:GO:0006665;;glucosylceramidase activity:GO:0004348
e_gw1.28.118.1	e_gw1.28.118.1	e_gw1.28.118.1	scaffold_28:174334-176878	1.5791	276.298	7.45097	0	yes	90302	IPR005154:Glycoside hydrolase family 67;;IPR017853:Glycoside hydrolase, catalytic core;;IPR011100:Glycosyl hydrolase 67 middle;;IPR011395:Alpha-glucuronidase;;IPR011099:Glycosyl hydrolase 67, C-terminal	sp|Q99024|AGUA_TRIRE Alpha-glucuronidase OS=Trichoderma reesei PE=1 SV=1:1746.1	-	-	alpha-glucuronidase activity:GO:0046559;;xylan catabolic process:GO:0045493;;extracellular region:GO:0005576	01.05.03 polysaccharide metabolism	01.25.01 extracellular polysaccharide degradation N.crassa
estExt_fgenesh2_kg.C_300009	estExt_fgenesh2_kg.C_300009	estExt_fgenesh2_kg.C_300009	scaffold_30:45338-47357	17.5331	3014.4	7.42565	0	yes	125125	IPR001722:Glycoside hydrolase, family 7;;IPR000254:Cellulose-binding region, fungal;;IPR008985:Concanavalin A-like lectin/glucanase	sp|P62694|GUX1_TRIRE Exoglucanase 1 OS=Trichoderma reesei GN=cbh1 PE=1 SV=1:991.875	-	KOG4562:Uncharacterized conserved protein (tumor-rejection antigen MAGE in humans)	cellulose binding:GO:0030248;;hydrolase activity, hydrolyzing O-glycosyl compounds:GO:0004553;;carbohydrate metabolic process:GO:0005975;;extracellular region:GO:0005576	01.05.03 polysaccharide metabolism
estExt_fgenesh1_pm.C_60197	estExt_fgenesh1_pm.C_60197	estExt_fgenesh1_pm.C_60197	scaffold_6:586262-587489	2.06092	333.322	7.33748	0	yes	136770	IPR013830:Esterase, SGNH hydrolase-type	-	-	-	-
estExt_fgenesh1_pg.C_1_t10124	estExt_fgenesh1_pg.C_1_t10124	estExt_fgenesh1_pg.C_1_t10124	scaffold_1:521457-522808	9.21503	1231.67	7.06242	0	yes	139633	IPR000254:Cellulose-binding region, fungal;;IPR005103:Glycoside hydrolase, family 61	sp|O14405|GUN4_TRIRE Endoglucanase-4 OS=Trichoderma reesei GN=cel61a PE=1 SV=1:691.804	-	KOG4157:beta-1,6-N-acetylglucosaminyltransferase, contains WSC domain	cellulose binding:GO:0030248;;hydrolase activity, hydrolyzing O-glycosyl compounds:GO:0004553;;carbohydrate metabolic process:GO:0005975;;extracellular region:GO:0005576	01.05.03 polysaccharide metabolism	01.25.01 extracellular polysaccharide degradation N.crassa
fgenesh1_pm.3_#_570	fgenesh1_pm.3_#_570	fgenesh1_pm.3_#_570	scaffold_3:1834601-1835693	2.70338	347.214	7.00492	0	yes	127981	IPR000683:Oxidoreductase, N-terminal;;IPR016040:NAD(P)-binding;;IPR004104:Oxidoreductase, C-terminal	sp|Q04869|YM94_YEAST Uncharacterized protein YMR315W OS=Saccharomyces cerevisiae (strain ATCC 204508 / S288c) GN=YMR315W PE=1 SV=1:102.449	-	KOG2742:Predicted oxidoreductase	metabolic process:GO:0008152;;electron transport:GO:0006118;;catalytic activity:GO:0003824;;binding:GO:0005488;;oxidoreductase activity:GO:0016491
estExt_fgenesh1_pm.C_190177	estExt_fgenesh1_pm.C_190177	estExt_fgenesh1_pm.C_190177	scaffold_19:569288-571762	11.3381	1443.12	6.99187	0	yes	138519	IPR005828:General substrate transporter;;IPR007114:Major facilitator superfamily;;IPR003663:Sugar transporter;;IPR016196:MFS general substrate transporter;;IPR005829:Sugar transporter, conserved site	sp|Q4U3U6|QAY_NEUAF Quinate permease OS=Neurospora africana GN=qa-y PE=3 SV=1:270.396	5.3.1.4:L-arabinose isomerase.	KOG0254:Predicted transporter (major facilitator superfamily)	sugar:hydrogen symporter activity:GO:0005351;;L-arabinose isomerase activity:GO:0008733;;carbohydrate transport:GO:0008643;;transporter activity:GO:0005215;;integral to membrane:GO:0016021;;transport:GO:0006810;;membrane:GO:0016020	20.01.03 C-compound and carbohydrate transport	20.09.18.07 non-vesicular cellular import
estExt_Genewise1.C_11_t20268	estExt_Genewise1.C_11_t20268	estExt_Genewise1.C_11_t20268	scaffold_11:969946-972791	2.72235	346.077	6.99009	0	yes	111943	IPR002860:BNR repeat;;IPR000254:Cellulose-binding region, fungal	sp|Q7Z9M8|XG74_TRIRE Xyloglucanase OS=Trichoderma reesei GN=cel74a PE=1 SV=1:1662.51	-	KOG3599:Ca2+-modulated nonselective cation channel polycystin	cellulose binding:GO:0030248;;hydrolase activity, hydrolyzing O-glycosyl compounds:GO:0004553;;carbohydrate metabolic process:GO:0005975;;extracellular region:GO:0005576	01.05.03 polysaccharide metabolism	01.25.01 extracellular polysaccharide degradation N.crassa	32.10.07 degradation / modification of foreign (exogenous) polysaccharides N.crassa	16.05 polysaccharide binding
e_gw1.34.52.1	e_gw1.34.52.1	e_gw1.34.52.1	scaffold_34:81952-83373	0.616928	55.6261	6.49452	0	yes	91667	IPR011050:Pectin lyase fold/virulence factor;;IPR000743:Glycoside hydrolase, family 28	sp|Q0CGP0|PGLRX_ASPTN Probable exopolygalacturonase X OS=Aspergillus terreus (strain NIH 2624 / FGSC A1156) GN=pgaX PE=3 SV=1:456.062	-	-	carbohydrate metabolic process:GO:0005975;;polygalacturonase activity:GO:0004650	01.05.03 polysaccharide metabolism
gm1.966_g	gm1.966_g	gm1.966_g	scaffold_1:3422073-3423078	0.979601	84.3851	6.42865	0	yes	5410	IPR002889:Carbohydrate-binding WSC	-	-	-	-
fgenesh1_pm.24_#_4	fgenesh1_pm.24_#_4	fgenesh1_pm.24_#_4	scaffold_24:9242-10623	0.118939	9.66699	6.34477	0.000212701	yes	133383	IPR011050:Pectin lyase fold/virulence factor;;IPR006626:Parallel beta-helix repeat;;IPR000743:Glycoside hydrolase, family 28	sp|A1D145|PGLR_NEOFI Probable endopolygalacturonase NFIA_008150 OS=Neosartorya fischeri (strain ATCC 1020 / DSM 3700 / FGSC A1164 / NRRL 181) GN=NFIA_008150 PE=3 SV=1:543.117	3.2.1.15:Polygalacturonase.	-	carbohydrate metabolic process:GO:0005975;;polygalacturonase activity:GO:0004650	01.05.02.04 sugar, glucoside, polyol and carboxylate anabolism S.cerevisiae	01.05.02.07 sugar, glucoside, polyol and carboxylate catabolism S.cerevisiae	01.05.03 polysaccharide metabolism	32.10.07 degradation / modification of foreign (exogenous) polysaccharides N.crassa	43.01.03.05 budding, cell polarity and filament formation S.cerevisiae
estExt_Genewise1Plus.C_6_t20092	estExt_Genewise1Plus.C_6_t20092	estExt_Genewise1Plus.C_6_t20092	scaffold_6:626514-627629	0.790052	62.4555	6.30474	0	yes
estExt_fgenesh2_kg.C_80104	estExt_fgenesh2_kg.C_80104	estExt_fgenesh2_kg.C_80104	scaffold_8:1013541-1014109	0.326659	25.8024	6.30358	0.000224385	yes
gm1.8021_g	gm1.8021_g	gm1.8021_g	scaffold_30:77303-78540	1.27848	96.1796	6.23322	0	yes	12465	IPR003042:Aromatic-ring hydroxylase;;IPR002938:Monooxygenase, FAD-binding	sp|Q01911|TETX_BACFR Tetracycline resistance protein from transposon Tn4351/Tn4400 OS=Bacteroides fragilis GN=tetX PE=4 SV=1:150.599	1.14.13.9:Kynurenine 3-monooxygenase.	KOG2614:Kynurenine 3-monooxygenase and related flavoprotein monooxygenases	metabolic process:GO:0008152;;aromatic compound metabolic process:GO:0006725;;electron transport:GO:0006118;;kynurenine 3-monooxygenase activity:GO:0004502;;oxidoreductase activity:GO:0016491;;monooxygenase activity:GO:0004497
estExt_fgenesh1_pm.C_50031	estExt_fgenesh1_pm.C_50031	estExt_fgenesh1_pm.C_50031	scaffold_5:102432-104802	0.590036	43.8745	6.21643	0	yes	136547	IPR001764:Glycoside hydrolase, family 3, N-terminal;;IPR002772:Glycoside hydrolase, family 3, C-terminal;;IPR017853:Glycoside hydrolase, catalytic core	sp|B0YB65|BGLL_ASPFC Probable beta-glucosidase L OS=Neosartorya fumigata (strain CEA10 / CBS 144.89 / FGSC A1163) GN=bglL PE=3 SV=1:879.782	3.2.1.21:Beta-glucosidase.	-	hydrolase activity, hydrolyzing O-glycosyl compounds:GO:0004553;;carbohydrate metabolic process:GO:0005975;;beta-glucosidase activity:GO:0008422	01.05.02.07 sugar, glucoside, polyol and carboxylate catabolism N.crassa	01.05.03 polysaccharide metabolism
fgenesh1_pg.21_#_123	fgenesh1_pg.21_#_123	fgenesh1_pg.21_#_123	scaffold_21:488497-490478	0.144136	10.2879	6.15737	1.9e-07	yes	38144	IPR013121:Ferric reductase, NAD binding;;IPR013130:Ferric reductase-like transmembrane component, N-terminal;;IPR013112:FAD-binding 8	sp|P36033|FRE2_YEAST Ferric/cupric reductase transmembrane component 2 OS=Saccharomyces cerevisiae (strain ATCC 204508 / S288c) GN=FRE2 PE=1 SV=1:106.301	-	KOG0039:Ferric reductase, NADH/NADPH oxidase and related proteins	FAD binding:GO:0050660;;electron transport:GO:0006118;;ferric-chelate reductase activity:GO:0000293;;integral to membrane:GO:0016021;;oxidoreductase activity:GO:0016491;;iron ion binding:GO:0005506	34.01.01.01 homeostasis of metal ions (Na, K, Ca etc.) N.crassa	20.03 transport facilities
estExt_Genewise1Plus.C_220046	estExt_Genewise1Plus.C_220046	estExt_Genewise1Plus.C_220046	scaffold_22:61215-65334	1.9012	133.77	6.13669	0	yes	102957	IPR011052:Proteinase and amylase inhibitor;;IPR000737:Proteinase inhibitor I7, squash	-	2.7.1.-:Phosphotransferases with an alcohol group as acceptor.	KOG1217:Fibrillins and related proteins containing Ca2+-binding EGF-like domains	LPPG:FO 2-phospho-L-lactate transferase activity:GO:0043743;;(S)-lactate 2-kinase activity:GO:0043841;;cytidine kinase activity:GO:0043771;;phosphatidylinositol phosphate kinase activity:GO:0016307;;glycerate 2-kinase activity:GO:0043798;;eukaryotic elongation factor-2 kinase regulator activity:GO:0042556;;serine-type endopeptidase inhibitor activity:GO:0004867;;inositol tetrakisphosphate 2-kinas…
estExt_Genewise1.C_300261	estExt_Genewise1.C_300261	estExt_Genewise1.C_300261	scaffold_30:290932-291667	9.2085	605.022	6.03788	0	yes	115921	IPR010829:Cerato-platanin	sp|O74238|SNP1_PHANO Protein SnodProt1 OS=Phaeosphaeria nodorum GN=SNOG_13722 PE=2 SV=1:134.42	-	-	-
fgenesh1_pg.24_#_2	fgenesh1_pg.24_#_2	fgenesh1_pg.24_#_2	scaffold_24:3260-4012	0.238016	13.8707	5.86484	0.000723824	yes	38418	IPR001137:Glycoside hydrolase, family 11;;IPR008985:Concanavalin A-like lectin/glucanase	sp|P36218|XYN1_TRIRE Endo-1,4-beta-xylanase 1 OS=Trichoderma reesei GN=xyn1 PE=1 SV=1:464.922	-	-	hydrolase activity, hydrolyzing O-glycosyl compounds:GO:0004553;;carbohydrate metabolic process:GO:0005975	01.05 C-compound and carbohydrate metabolism	01.05.02.07 sugar, glucoside, polyol and carboxylate catabolism N.crassa	32.10.07 degradation / modification of foreign (exogenous) polysaccharides N.crassa
estExt_fgenesh2_kg.C_340005	estExt_fgenesh2_kg.C_340005	estExt_fgenesh2_kg.C_340005	scaffold_34:11029-11802	34.108	1957.77	5.84296	0	yes
gm1.3745_g	gm1.3745_g	gm1.3745_g	scaffold_7:983647-984446	3.54516	181.018	5.67414	0	yes
fgenesh1_pg.14_#_132	fgenesh1_pg.14_#_132	fgenesh1_pg.14_#_132	scaffold_14:547608-548073	1.90557	92.3467	5.59877	2.23e-11	yes
estExt_Genemark1.C_170165	estExt_Genemark1.C_170165	estExt_Genemark1.C_170165	scaffold_17:633215-634193	2.60733	112.369	5.42953	0	yes	25940	IPR000254:Cellulose-binding region, fungal;;IPR009009:Barwin-related endoglucanase;;IPR007112:Expansin 45, endoglucanase-like;;IPR000334:Glycoside hydrolase, family 45	sp|P43317|GUN5_TRIRE Endoglucanase-5 OS=Trichoderma reesei GN=egl5 PE=3 SV=1:478.789	-	-	cellulose binding:GO:0030248;;hydrolase activity, hydrolyzing O-glycosyl compounds:GO:0004553;;carbohydrate metabolic process:GO:0005975;;cellulase activity:GO:0008810;;extracellular region:GO:0005576
fgenesh1_pm.31_#_39	fgenesh1_pm.31_#_39	fgenesh1_pm.31_#_39	scaffold_31:112397-112829	7.81702	331.255	5.40518	0	yes
estExt_Genewise1Plus.C_300040	estExt_Genewise1Plus.C_300040	estExt_Genewise1Plus.C_300040	scaffold_30:34984-36773	44.8105	1748.14	5.28584	0	yes	104220	IPR007117:Pollen allergen/expansin, C-terminal;;IPR000254:Cellulose-binding region, fungal;;IPR009009:Barwin-related endoglucanase;;IPR007112:Expansin 45, endoglucanase-like	sp|Q40638|EXPB1_ORYSJ Expansin-B1 OS=Oryza sativa subsp. japonica GN=EXPB1a PE=1 SV=2:64.6994	-	KOG4157:beta-1,6-N-acetylglucosaminyltransferase, contains WSC domain	cellulose binding:GO:0030248;;hydrolase activity, hydrolyzing O-glycosyl compounds:GO:0004553;;carbohydrate metabolic process:GO:0005975;;extracellular region:GO:0005576
estExt_fgenesh1_pm.C_1_t20355	estExt_fgenesh1_pm.C_1_t20355	estExt_fgenesh1_pm.C_1_t20355	scaffold_1:2945311-2946011	0.320785	12.0362	5.22963	0.00345948	yes
estExt_Genemark1.C_390038	estExt_Genemark1.C_390038	estExt_Genemark1.C_390038	scaffold_39:127091-128961	1.92211	62.9677	5.03385	0	yes	26932	IPR005828:General substrate transporter;;IPR007114:Major facilitator superfamily;;IPR003663:Sugar transporter;;IPR016196:MFS general substrate transporter	sp|P39932|STL1_YEAST Sugar transporter STL1 OS=Saccharomyces cerevisiae (strain ATCC 204508 / S288c) GN=STL1 PE=1 SV=2:208.379	5.3.1.4:L-arabinose isomerase.	KOG0254:Predicted transporter (major facilitator superfamily)	sugar:hydrogen symporter activity:GO:0005351;;L-arabinose isomerase activity:GO:0008733;;carbohydrate transport:GO:0008643;;transporter activity:GO:0005215;;integral to membrane:GO:0016021;;transport:GO:0006810;;membrane:GO:0016020	01.05 C-compound and carbohydrate metabolism	01.05.25 regulation of C-compound and carbohydrate metabolism N.crassa	20.01.03 C-compound and carbohydrate transport	20.09.18 cellular import	20.09.18.07 non-vesicular cellular import	34.11.12 perception of nutrients and nutritional adaptation N.crassa	20.03 transport facilities
fgenesh1_pm.3_#_569	fgenesh1_pm.3_#_569	fgenesh1_pm.3_#_569	scaffold_3:1831840-1833598	1.68282	54.7638	5.02427	0	yes	127980	IPR005828:General substrate transporter;;IPR007114:Major facilitator superfamily;;IPR003663:Sugar transporter;;IPR016196:MFS general substrate transporter	sp|P07921|LACP_KLULA Lactose permease OS=Kluyveromyces lactis (strain ATCC 8585 / CBS 2359 / DSM 70799 / NBRC 1267 / NRRL Y-1140 / WM37) GN=LAC12 PE=3 SV=1:299.671	-	KOG0254:Predicted transporter (major facilitator superfamily)	sugar:hydrogen symporter activity:GO:0005351;;carbohydrate transport:GO:0008643;;transporter activity:GO:0005215;;integral to membrane:GO:0016021;;transport:GO:0006810;;membrane:GO:0016020
e_gw1.49.37.1	e_gw1.49.37.1	e_gw1.49.37.1	scaffold_49:34722-35220	1.32327	38.4764	4.86179	0.000101592	yes	93277	IPR016191:Ribonuclease/ribotoxin;;IPR000026:Guanine-specific ribonuclease N1 and T1	sp|P26875|RNT1_TRIHA Guanyl-specific ribonuclease Th1 OS=Trichoderma harzianum PE=1 SV=1:150.984	-	-	endoribonuclease activity:GO:0004521;;RNA binding:GO:0003723;;ribonuclease activity:GO:0004540
estExt_Genewise1Plus.C_2_t10435	estExt_Genewise1Plus.C_2_t10435	estExt_Genewise1Plus.C_2_t10435	scaffold_2:514415-516584	5.18898	132.193	4.67105	0	yes	95281	IPR007114:Major facilitator superfamily;;IPR011701:Major facilitator superfamily MFS-1;;IPR016196:MFS general substrate transporter	sp|Q00357|TOXA_COCCA Putative HC-toxin efflux carrier TOXA OS=Cochliobolus carbonum GN=TOXA PE=3 SV=1:300.056	-	KOG0254:Predicted transporter (major facilitator superfamily)	transporter activity:GO:0005215;;integral to membrane:GO:0016021;;transport:GO:0006810	20.01.27 drug/toxin transport	20.09.16 cellular export and secretion	20.09.16.01 Type I protein secretion system (ABC-type transport systems) N.crassa	32.05.01 resistance proteins	32.07.05 detoxification by export	20.03.25 ABC transporters
e_gw1.1.629.1	e_gw1.1.629.1	e_gw1.1.629.1	scaffold_1:2701281-2703846	5.29283	134.346	4.66577	0	yes	67432	IPR017853:Glycoside hydrolase, catalytic core;;IPR006102:Glycoside hydrolase family 2, immunoglobulin-like beta-sandwich;;IPR008979:Galactose-binding like;;IPR006104:Glycoside hydrolase family 2, carbohydrate-binding	sp|Q0CCA0|MANBB_ASPTN Probable beta-mannosidase B OS=Aspergillus terreus (strain NIH 2624 / FGSC A1156) GN=mndB PE=3 SV=2:790.801	3.2.1.25:Beta-mannosidase.	KOG2230:Predicted beta-mannosidase	hydrolase activity, hydrolyzing O-glycosyl compounds:GO:0004553;;carbohydrate metabolic process:GO:0005975;;beta-mannosidase activity:GO:0004567	01.05.03 polysaccharide metabolism
e_gw1.3.246.1	e_gw1.3.246.1	e_gw1.3.246.1	scaffold_3:1649458-1650805	2.03045	46.392	4.514	0	yes	73642	IPR005152:Secretory lipase	sp|O94091|LIP1_CANAL Lipase 1 OS=Candida albicans GN=LIP1 PE=3 SV=2:210.69	-	-	-
estExt_fgenesh2_kg.C_130031	estExt_fgenesh2_kg.C_130031	estExt_fgenesh2_kg.C_130031	scaffold_13:335353-336833	2.37643	52.3278	4.46071	0	yes	123870	IPR016040:NAD(P)-binding;;IPR013154:Alcohol dehydrogenase GroES-like;;IPR013149:Alcohol dehydrogenase, zinc-binding;;IPR011032:GroES-like	sp|Q64442|DHSO_MOUSE Sorbitol dehydrogenase OS=Mus musculus GN=Sord PE=1 SV=3:286.189	1.1.1.14:L-iditol 2-dehydrogenase.	KOG0024:Sorbitol dehydrogenase	metabolic process:GO:0008152;;catalytic activity:GO:0003824;;binding:GO:0005488;;L-iditol 2-dehydrogenase activity:GO:0003939	01.05 C-compound and carbohydrate metabolism	01.05.02 sugar, glucoside, polyol and carboxylate metabolism	01.05.02.04 sugar, glucoside, polyol and carboxylate anabolism S.cerevisiae	01.05.02.07 sugar, glucoside, polyol and carboxylate catabolism S.cerevisiae	01.07 metabolism of vitamins, cofactors, and prosthetic groups	01.20.01.01 metabolism of secondary monosaccharides S.cerevisiae	16.17 metal binding	16.17.09 heavy metal binding (Cu, Fe, Zn)	16.21.07 NAD/NADP binding
estExt_Genewise1Plus.C_1_t20271	estExt_Genewise1Plus.C_1_t20271	estExt_Genewise1Plus.C_1_t20271	scaffold_1:977340-978712	0.347169	7.59448	4.45124	1.6e-05	yes	94061	IPR017853:Glycoside hydrolase, catalytic core;;IPR001223:Glycoside hydrolase, family 18, catalytic domain;;IPR001579:Glycoside hydrolase, chitinase active site	sp|P29025|CHI1_RHINI Chitinase 1 OS=Rhizopus niveus GN=CHI1 PE=3 SV=1:206.453	3.2.1.14:Chitinase.	KOG4701:Chitinase	endochitinase activity:GO:0008843;;hydrolase activity, hydrolyzing O-glycosyl compounds:GO:0004553;;carbohydrate metabolic process:GO:0005975;;chitinase activity:GO:0004568	01.05.03 polysaccharide metabolism
estExt_Genewise1Plus.C_18_t20048	estExt_Genewise1Plus.C_18_t20048	estExt_Genewise1Plus.C_18_t20048	scaffold_18:678783-679668	4.88362	106.339	4.44458	0	yes	102293	IPR000028:Chloroperoxidase	sp|P04963|PRXC_CALFU Chloroperoxidase OS=Caldariomyces fumago GN=CPO PE=1 SV=3:82.4185	-	-	electron transport:GO:0006118;;peroxidase activity:GO:0004601
estExt_Genewise1.C_12_t20163	estExt_Genewise1.C_12_t20163	estExt_Genewise1.C_12_t20163	scaffold_12:871963-873896	10.652	223.23	4.38933	0	yes	112243	IPR005198:Glycoside hydrolase, family 76;;IPR008928:Six-hairpin glycosidase-like;;IPR014480:Mannan endo-1,6-alpha-mannosidase	sp|P36091|DCW1_YEAST Mannan endo-1,6-alpha-mannosidase DCW1 OS=Saccharomyces cerevisiae (strain ATCC 204508 / S288c) GN=DCW1 PE=1 SV=1:340.117	3.2.1.101:Mannan endo-1,6-beta-mannosidase.	-	mannan endo-1,6-alpha-mannosidase activity:GO:0008496;;catalytic activity:GO:0003824	40.01 cell growth / morphogenesis	40.01.03 directional cell growth (morphogenesis) N.crassa	42.01 cell wall	42.04 cytoskeleton/structural proteins	43.01.03 fungal and other eukaryotic cell type differentiation N.crassa	43.01.03.05 budding, cell polarity and filament formation N.crassa
e_gw1.4.746.1	e_gw1.4.746.1	e_gw1.4.746.1	scaffold_4:124855-126950	1.84162	38.5493	4.38766	0	yes	74437	IPR005828:General substrate transporter;;IPR007114:Major facilitator superfamily;;IPR003663:Sugar transporter;;IPR016196:MFS general substrate transporter;;IPR005829:Sugar transporter, conserved site	sp|Q9XIH7|PLT1_ARATH Putative polyol transporter 1 OS=Arabidopsis thaliana GN=PLT1 PE=2 SV=1:196.052	5.3.1.4:L-arabinose isomerase.	KOG0254:Predicted transporter (major facilitator superfamily)	sugar:hydrogen symporter activity:GO:0005351;;L-arabinose isomerase activity:GO:0008733;;carbohydrate transport:GO:0008643;;transporter activity:GO:0005215;;integral to membrane:GO:0016021;;transport:GO:0006810;;membrane:GO:0016020	01.05 C-compound and carbohydrate metabolism	01.06 lipid, fatty acid and isoprenoid metabolism N.crassa	20.01.03 C-compound and carbohydrate transport	20.01.13 lipid/fatty acid transport	20.09.16 cellular export and secretion	20.09.18 cellular import	20.09.18.07 non-vesicular cellular import	20.03 transport facilities
estExt_fgenesh1_pm.C_270029	estExt_fgenesh1_pm.C_270029	estExt_fgenesh1_pm.C_270029	scaffold_27:108659-112768	3.41359	71.0769	4.38002	0	yes	139005	IPR008250:E1-E2 ATPase-associated region;;IPR001757:ATPase, P-type, K/Mg/Cd/Cu/Zn/Na/Ca/Na/H-transporter;;IPR005834:Haloacid dehalogenase-like hydrolase;;IPR004014:ATPase, P-type cation-transporter, N-terminal;;IPR006068:ATPase, P-type cation-transporter, C-terminal;;IPR006414:Potassium/sodium efflux P-type ATPase, fungal-type	sp|P22189|ATC3_SCHPO Calcium-transporting ATPase 3 OS=Schizosaccharomyces pombe (strain ATCC 38366 / 972) GN=cta3 PE=1 SV=1:899.427	3.6.3.8:Calcium-transporting ATPase.	KOG0202:Ca2+ transporting ATPase	cation transport:GO:0006812;;integral to membrane:GO:0016021;;ATPase activity, coupled to transmembrane movement of ions, phosphorylative mechanism:GO:0015662;;membrane:GO:0016020;;hydrolase activity, acting on acid anhydrides, catalyzing transmembrane movement of substances:GO:0016820;;calcium-transporting ATPase activity:GO:0005388;;ATP binding:GO:0005524;;metabolic process:GO:0008152;;catalyti…	20.01.01.01 cation transport (H+, Na+, K+, Ca2+ , NH4+, etc.) N.crassa	20.09 transport routes	32.01.04 pH stress response	34.01.01 homeostasis of cations	34.01.01.01 homeostasis of metal ions (Na, K, Ca etc.) N.crassa	20.03.22 transport ATPases
estExt_Genewise1Plus.C_5_t10017	estExt_Genewise1Plus.C_5_t10017	estExt_Genewise1Plus.C_5_t10017	scaffold_5:14664-16575	2.32497	46.5746	4.32426	0	yes	97259	IPR005828:General substrate transporter;;IPR007114:Major facilitator superfamily;;IPR003663:Sugar transporter;;IPR016196:MFS general substrate transporter	sp|P49374|HGT1_KLULA High-affinity glucose transporter OS=Kluyveromyces lactis (strain ATCC 8585 / CBS 2359 / DSM 70799 / NBRC 1267 / NRRL Y-1140 / WM37) GN=HGT1 PE=3 SV=1:176.022	5.3.1.4:L-arabinose isomerase.	KOG0254:Predicted transporter (major facilitator superfamily)	sugar:hydrogen symporter activity:GO:0005351;;L-arabinose isomerase activity:GO:0008733;;carbohydrate transport:GO:0008643;;transporter activity:GO:0005215;;integral to membrane:GO:0016021;;transport:GO:0006810;;membrane:GO:0016020	20.01.03 C-compound and carbohydrate transport	20.09.18 cellular import	20.09.18.07 non-vesicular cellular import	20.03 transport facilities
estExt_Genemark1.C_350042	estExt_Genemark1.C_350042	estExt_Genemark1.C_350042	scaffold_35:139844-140655	6.00106	119.085	4.31064	0	yes
gm1.642_g	gm1.642_g	gm1.642_g	scaffold_1:2333011-2333648	10.5184	191.786	4.18851	4.89e-05	yes
e_gw1.1.749.1	e_gw1.1.749.1	e_gw1.1.749.1	scaffold_1:2948435-2950583	0.83609	14.8916	4.1547	1.27e-13	yes	69332	IPR000719:Protein kinase, core;;IPR011009:Protein kinase-like	-	-	KOG1474:Transcription initiation factor TFIID, subunit BDF1 and related bromodomain proteins	ATP binding:GO:0005524;;protein kinase activity:GO:0004672;;protein amino acid phosphorylation:GO:0006468
fgenesh1_pm.22_#_65	fgenesh1_pm.22_#_65	fgenesh1_pm.22_#_65	scaffold_22:210758-211685	2.48143	43.8529	4.14343	1.15e-13	yes
gw1.11.644.1	gw1.11.644.1	gw1.11.644.1	scaffold_11:457638-458145	0.802759	12.8755	4.00352	0.00182147	yes	61274	IPR002110:Ankyrin	sp|Q9EQG6|KDIS_RAT Kinase D-interacting substrate of 220 kDa OS=Rattus norvegicus GN=Kidins220 PE=1 SV=2:75.0998	-	KOG0502:Integral membrane ankyrin-repeat protein Kidins220 (protein kinase D substrate)	-
estExt_fgenesh2_kg.C_190009	estExt_fgenesh2_kg.C_190009	estExt_fgenesh2_kg.C_190009	scaffold_19:67238-68324	3.42504	53.4148	3.96305	1.4e-14	yes
estExt_Genewise1Plus.C_14_t20043	estExt_Genewise1Plus.C_14_t20043	estExt_Genewise1Plus.C_14_t20043	scaffold_14:698569-700828	14.9	232.077	3.96122	0	yes	101246	IPR005828:General substrate transporter;;IPR007114:Major facilitator superfamily;;IPR003663:Sugar transporter;;IPR016196:MFS general substrate transporter;;IPR005829:Sugar transporter, conserved site	sp|Q9XIH7|PLT1_ARATH Putative polyol transporter 1 OS=Arabidopsis thaliana GN=PLT1 PE=2 SV=1:187.963	5.3.1.4:L-arabinose isomerase.	KOG0254:Predicted transporter (major facilitator superfamily)	sugar:hydrogen symporter activity:GO:0005351;;L-arabinose isomerase activity:GO:0008733;;carbohydrate transport:GO:0008643;;transporter activity:GO:0005215;;integral to membrane:GO:0016021;;transport:GO:0006810;;membrane:GO:0016020	01.05 C-compound and carbohydrate metabolism	01.06 lipid, fatty acid and isoprenoid metabolism N.crassa	20.01.03 C-compound and carbohydrate transport	20.01.13 lipid/fatty acid transport	20.09.16 cellular export and secretion	20.09.18 cellular import	20.09.18.07 non-vesicular cellular import	20.03 transport facilities
fgenesh1_pm.10_#_248	fgenesh1_pm.10_#_248	fgenesh1_pm.10_#_248	scaffold_10:875451-876635	5.24764	81.2917	3.95337	0	yes
gm1.970_g	gm1.970_g	gm1.970_g	scaffold_1:3429354-3429848	2.4397	36.4333	3.90048	0.00250703	yes
estExt_Genemark1.C_2_t10292	estExt_Genemark1.C_2_t10292	estExt_Genemark1.C_2_t10292	scaffold_2:1070109-1071457	9.85328	139.663	3.8252	0	yes	23689	IPR005198:Glycoside hydrolase, family 76;;IPR008928:Six-hairpin glycosidase-like;;IPR016130:Protein-tyrosine phosphatase, active site	sp|Q9P6I3|YHG7_SCHPO Putative mannan endo-1,6-alpha-mannosidase C1198.07c OS=Schizosaccharomyces pombe (strain ATCC 38366 / 972) GN=SPBC1198.07c PE=2 SV=1:78.5666	-	-	dephosphorylation:GO:0016311;;phosphoric monoester hydrolase activity:GO:0016791;;catalytic activity:GO:0003824;;protein tyrosine phosphatase activity:GO:0004725	01.05.03 polysaccharide metabolism
gw1.26.185.1	gw1.26.185.1	gw1.26.185.1	scaffold_26:268480-269764	2.11461	29.1534	3.7852	2.08e-12	yes
e_gw1.26.53.1	e_gw1.26.53.1	e_gw1.26.53.1	scaffold_26:267061-267457	3.43459	45.0128	3.71213	5.32e-06	yes	89610	IPR010730:Heterokaryon incompatibility	sp|Q9UV10|HET6_NEUCR Heterokaryon incompatibility protein 6, OR allele OS=Neurospora crassa GN=het-6 PE=4 SV=1:71.633	-	-	-
fgenesh1_pm.4_#_160	fgenesh1_pm.4_#_160	fgenesh1_pm.4_#_160	scaffold_4:532293-533437	2.62176	34.2074	3.7057	1.31e-10	yes	128163	-	-	-	KOG1216:von Willebrand factor and related coagulation proteins	-
e_gw1.1.591.1	e_gw1.1.591.1	e_gw1.1.591.1	scaffold_1:2439348-2440308	0.892175	11.6266	3.70396	7.36e-07	yes	67663	IPR004304:Acetamidase/Formamidase	sp|Q9URY7|FMDA_SCHPO Putative formamidase C869.04 OS=Schizosaccharomyces pombe (strain ATCC 38366 / 972) GN=SPAC869.04 PE=2 SV=1:103.99	3.5.1.49:Formamidase.	-	metabolic process:GO:0008152;;hydrolase activity, acting on carbon-nitrogen (but not peptide) bonds, in linear amides:GO:0016811;;formamidase activity:GO:0004328
estExt_Genewise1Plus.C_1_t50314	estExt_Genewise1Plus.C_1_t50314	estExt_Genewise1Plus.C_1_t50314	scaffold_1:2952734-2954260	70.553	857.993	3.60419	0	yes	94809	IPR001395:Aldo/keto reductase	sp|Q876L8|XYL1_TRIRE NAD(P)H-dependent D-xylose reductase xyl1 OS=Trichoderma reesei GN=xyl1 PE=3 SV=1:676.011	1.1.1.179:D-xylose 1-dehydrogenase (NADP+).	KOG1577:Aldo/keto reductase family proteins	oxidoreductase activity:GO:0016491;;D-xylose 1-dehydrogenase (NADP+) activity:GO:0047837	01.05 C-compound and carbohydrate metabolism	01.05.02 sugar, glucoside, polyol and carboxylate metabolism	01.05.02.07 sugar, glucoside, polyol and carboxylate catabolism S.cerevisiae	01.05.03 polysaccharide metabolism	01.06 lipid, fatty acid and isoprenoid metabolism	01.06.06 isoprenoid metabolism	01.06.06.11 tetracyclic and pentacyclic triterpenes (cholesterin, steroids and hopanoids) metabolism	01.07 metabolism of vitamins, cofactors, and prosthetic groups	01.20 secondary metabolism	01.20.17.09 metabolism of alkaloids	02.16 fermentation	32.01.03 osmotic and salt stress response	32.01.05 heat shock response	32.10 degradation / modification of foreign (exogenous) compounds	34.11.03.13 osmosensing	16.21.07 NAD/NADP binding
estExt_Genewise1Plus.C_3_t10184	estExt_Genewise1Plus.C_3_t10184	estExt_Genewise1Plus.C_3_t10184	scaffold_3:200196-202438	8.25244	100.034	3.59953	0	yes	96157	IPR011333:BTB/POZ fold;;IPR000210:BTB/POZ-like	-	-	KOG4475:FOG: Immunoglobin and related proteins	protein binding:GO:0005515
estExt_fgenesh1_pm.C_40040	estExt_fgenesh1_pm.C_40040	estExt_fgenesh1_pm.C_40040	scaffold_4:122367-123752	33.4587	399.474	3.57765	0	yes	136351	IPR001585:Transaldolase	sp|B2J2D9|TAL_NOSP7 Transaldolase OS=Nostoc punctiforme (strain ATCC 29133 / PCC 73102) GN=tal PE=3 SV=1:100.138	2.2.1.2:Transaldolase.	KOG2772:Transaldolase	carbohydrate metabolic process:GO:0005975;;transaldolase activity:GO:0004801
fgenesh1_pm.1_#_888	fgenesh1_pm.1_#_888	fgenesh1_pm.1_#_888	scaffold_1:3033116-3034054	3.42845	40.4729	3.56132	7.66e-11	yes
estExt_fgenesh1_pg.C_170090	estExt_fgenesh1_pg.C_170090	estExt_fgenesh1_pg.C_170090	scaffold_17:362689-363901	3.74422	42.8737	3.51735	1.03e-13	yes	142298	IPR017853:Glycoside hydrolase, catalytic core	sp|P29026|CHI1_RHIOL Chitinase 1 OS=Rhizopus oligosporus GN=CHI1 PE=1 SV=1:52.373	-	-	-	01.05 C-compound and carbohydrate metabolism	42.01 cell wall
estExt_fgenesh2_kg.C_50110	estExt_fgenesh2_kg.C_50110	estExt_fgenesh2_kg.C_50110	scaffold_5:1099018-1099636	0.850219	9.70923	3.51345	0.00120042	yes
e_gw1.68.2.1	e_gw1.68.2.1	e_gw1.68.2.1	scaffold_68:160-1846	1.11018	12.4546	3.48781	4.14e-10	yes
e_gw1.7.292.1	e_gw1.7.292.1	e_gw1.7.292.1	scaffold_7:766335-767997	1.80629	20.1482	3.47955	5.75e-12	yes	77521	IPR006710:Glycoside hydrolase, family 43	sp|P94489|XYNB_BACSU Beta-xylosidase OS=Bacillus subtilis GN=xynB PE=1 SV=2:446.047	-	-	hydrolase activity, hydrolyzing O-glycosyl compounds:GO:0004553;;carbohydrate metabolic process:GO:0005975	01.05.02.07 sugar, glucoside, polyol and carboxylate catabolism B.subtilis	01.05.03 polysaccharide metabolism
estExt_fgenesh1_pg.C_240100	estExt_fgenesh1_pg.C_240100	estExt_fgenesh1_pg.C_240100	scaffold_24:325942-327921	2.21538	23.6908	3.4187	6.43e-13	yes	142761	-	sp|Q55DH0|Y1320_DICDI PI-PLC X domain-containing protein DDB_G0269228 OS=Dictyostelium discoideum GN=DDB_G0269228 PE=2 SV=1:60.077	-	KOG4306:Glycosylphosphatidylinositol-specific phospholipase C	-
fgenesh1_pm.12_#_226	fgenesh1_pm.12_#_226	fgenesh1_pm.12_#_226	scaffold_12:854614-854992	34.8727	360.436	3.36957	1.87e-13	yes
estExt_fgenesh2_kg.C_410009	estExt_fgenesh2_kg.C_410009	estExt_fgenesh2_kg.C_410009	scaffold_41:41159-42459	2.22661	22.8757	3.3609	1.79e-07	yes	125426	-	sp|P22222|E13B_CELCE Glucan endo-1,3-beta-glucosidase OS=Cellulosimicrobium cellulans PE=1 SV=1:84.3445	-	-	-	01.05 C-compound and carbohydrate metabolism
e_gw1.9.665.1	e_gw1.9.665.1	e_gw1.9.665.1	scaffold_9:1072359-1072974	7.82358	80.1976	3.35766	7.55e-11	yes	80148	IPR015141:Phospholipase A2, prokaryotic/fungal;;IPR016090:Phospholipase A2	-	-	-	-
e_gw1.18.61.1	e_gw1.18.61.1	e_gw1.18.61.1	scaffold_18:489486-491210	4.93989	50.5422	3.35494	4.05e-14	yes	85923	IPR001128:Cytochrome P450;;IPR002401:Cytochrome P450, E-class, group I	sp|P93846|CP51_SORBI Obtusifoliol 14-alpha demethylase OS=Sorghum bicolor GN=CYP51 PE=1 SV=1:93.9745	-	KOG0684:Cytochrome P450	electron transport:GO:0006118;;sterol 14-demethylase activity:GO:0008398;;heme binding:GO:0020037;;monooxygenase activity:GO:0004497;;iron ion binding:GO:0005506
e_gw1.22.381.1	e_gw1.22.381.1	e_gw1.22.381.1	scaffold_22:379854-382533	1.1407	11.5957	3.3456	4.65e-11	yes	87764	IPR008009:Putative Ig;;IPR006644:Dystroglycan-type cadherin-like;;IPR015919:Cadherin-like	sp|P38928|AXL2_YEAST Protein AXL2 OS=Saccharomyces cerevisiae (strain ATCC 204508 / S288c) GN=AXL2 PE=1 SV=1:160.614	-	-	calcium ion binding:GO:0005509;;protein binding:GO:0005515;;membrane:GO:0016020
gm1.3747_g	gm1.3747_g	gm1.3747_g	scaffold_7:992100-993309	0.994188	10.0631	3.33942	2.24e-07	yes	8191	-	-	2.7.7.6:DNA-directed RNA polymerase.	KOG0260:RNA polymerase II, large subunit	RNA polymerase activity:GO:0034062;;DNA-directed RNA polymerase III activity:GO:0003902;;DNA-directed RNA polymerase I activity:GO:0003900;;DNA-directed RNA polymerase II activity:GO:0003901;;DNA-directed RNA polymerase activity:GO:0003899
e_gw1.31.204.1	e_gw1.31.204.1	e_gw1.31.204.1	scaffold_31:198739-200583	1.15615	11.4635	3.30965	8.98e-09	yes	91130	IPR007114:Major facilitator superfamily;;IPR011701:Major facilitator superfamily MFS-1;;IPR016196:MFS general substrate transporter	sp|P53322|TNA1_YEAST High-affinity nicotinic acid transporter OS=Saccharomyces cerevisiae (strain ATCC 204508 / S288c) GN=TNA1 PE=1 SV=1:228.794	-	KOG2533:Permease of the major facilitator superfamily	transporter activity:GO:0005215;;integral to membrane:GO:0016021;;transport:GO:0006810	20.01.03 C-compound and carbohydrate transport	20.01.23 allantoin and allantoate transport	20.01.25 vitamine/cofactor transport	20.09.18 cellular import	20.09.18.07 non-vesicular cellular import	20.03 transport facilities
gm1.8581_g	gm1.8581_g	gm1.8581_g	scaffold_39:129989-130831	0.915409	8.85783	3.27447	0.000490878	yes	13025	IPR009939:Fungal chitosanase	-	-	-	-	01.05.03 polysaccharide metabolism
gm1.5135_g	gm1.5135_g	gm1.5135_g	scaffold_12:492554-495294	2.15205	20.254	3.23443	7.65e-13	yes	9579	IPR000818:TEA/ATTS	sp|P20945|ABAA_EMENI Regulatory protein abaA OS=Emericella nidulans GN=abaA PE=4 SV=3:67.3958	-	KOG3841:TEF-1 and related transcription factor, TEAD family	regulation of transcription, DNA-dependent:GO:0006355;;nucleus:GO:0005634;;transcription factor activity:GO:0003700
estExt_fgenesh1_pm.C_340035	estExt_fgenesh1_pm.C_340035	estExt_fgenesh1_pm.C_340035	scaffold_34:93649-97097	1.25598	11.8021	3.23216	3.17e-10	yes
e_gw1.6.693.1	e_gw1.6.693.1	e_gw1.6.693.1	scaffold_6:622627-623454	1.26738	11.6542	3.20093	4.24e-05	yes	76732	IPR011150:Cutinase, monofunctional;;IPR000675:Cutinase	sp|Q9Y7G8|CUTI_PYRBR Cutinase OS=Pyrenopeziza brassicae PE=3 SV=1:184.496	-	-	metabolic process:GO:0008152;;hydrolase activity:GO:0016787;;cutinase activity:GO:0050525;;extracellular region:GO:0005576
estExt_Genewise1.C_9_t20205	estExt_Genewise1.C_9_t20205	estExt_Genewise1.C_9_t20205	scaffold_9:912526-914505	2.11996	19.0773	3.16975	1.59e-10	yes	111088	IPR001547:Glycoside hydrolase, family 5;;IPR003137:Protease-associated PA;;IPR007484:Peptidase M28	sp|Q2ULM2|LAP2_ASPOR probable leucine aminopeptidase 2 OS=Aspergillus oryzae (strain ATCC 42149 / RIB 40) GN=lap2 PE=1 SV=1:228.409	3.4.11.-:Aminopeptidases.	KOG2195:Transferrin receptor and related proteins containing the protease-associated (PA) domain	hydrolase activity, hydrolyzing O-glycosyl compounds:GO:0004553;;carbohydrate metabolic process:GO:0005975;;peptidase activity:GO:0008233;;alanine aminopeptidase activity:GO:0016284;;proteolysis:GO:0006508	14.07.11 protein processing (proteolytic)	14.13.04 lysosomal and vacuolar protein degradation N.crassa	14.13.04.02 vacuolar protein degradation
e_gw1.23.301.1	e_gw1.23.301.1	e_gw1.23.301.1	scaffold_23:358833-359631	1.53525	13.2929	3.11411	6.25e-06	yes	88289	IPR013216:Methyltransferase type 11	sp|Q9C6B9|PEAM3_ARATH Phosphoethanolamine N-methyltransferase 3 OS=Arabidopsis thaliana GN=NMT3 PE=2 SV=2:71.2478	2.1.1.103:Phosphoethanolamine N-methyltransferase.	KOG1269:SAM-dependent methyltransferases	metabolic process:GO:0008152;;phosphoethanolamine N-methyltransferase activity:GO:0000234;;methyltransferase activity:GO:0008168
gm1.7136_g	gm1.7136_g	gm1.7136_g	scaffold_22:428207-429647	1.42706	12.2129	3.09729	6.72e-08	yes	11580	IPR017853:Glycoside hydrolase, catalytic core;;IPR001680:WD40 repeat	sp|Q76FP5|6GAL_TRIVI Endo-beta-1,6-galactanase OS=Trichoderma viride GN=6GAL PE=1 SV=1:896.73	-	-	-
estExt_Genewise1.C_12_t10245	estExt_Genewise1.C_12_t10245	estExt_Genewise1.C_12_t10245	scaffold_12:355424-356618	4.95094	42.1864	3.091	4.66e-10	yes
e_gw1.11.425.1	e_gw1.11.425.1	e_gw1.11.425.1	scaffold_11:257042-258153	2.34345	19.9219	3.08765	2.45e-07	yes	81487	IPR013217:Methyltransferase type 12	-	-	-	-
estExt_Genewise1Plus.C_12_t10330	estExt_Genewise1Plus.C_12_t10330	estExt_Genewise1Plus.C_12_t10330	scaffold_12:466850-467846	1.44252	12.0583	3.06336	2.42e-06	yes	100485	IPR016040:NAD(P)-binding;;IPR002347:Glucose/ribitol dehydrogenase;;IPR002198:Short-chain dehydrogenase/reductase SDR	sp|Q7Z9I4|YCP6_SCHPO Uncharacterized oxidoreductase C663.06c OS=Schizosaccharomyces pombe (strain ATCC 38366 / 972) GN=SPCC663.06c PE=2 SV=1:93.9745	1.1.1.-:With NAD(+) or NADP(+) as acceptor.	KOG1611:Predicted short chain-type dehydrogenase	mevaldate reductase activity:GO:0004495;;epoxide dehydrogenase activity:GO:0018451;;steroid dehydrogenase activity:GO:0016229;;steroid dehydrogenase activity, acting on the CH-CH group of donors:GO:0033765;;metabolic process:GO:0008152;;3-keto sterol reductase activity:GO:0000253;;(R)-2-hydroxyglutarate dehydrogenase activity:GO:0051990;;catalytic activity:GO:0003824;;oxidoreductase activity:GO:0…	01.01 amino acid metabolism	01.05 C-compound and carbohydrate metabolism	01.05.03 polysaccharide metabolism	01.05.09.04 aminosaccharide anabolism	01.06 lipid, fatty acid and isoprenoid metabolism	01.06.05 fatty acid metabolism	01.20 secondary metabolism	01.20.05.09 metabolism of eicosanoids	01.20.19.01 metabolism of porphyrins	10.03.01 mitotic cell cycle and cell cycle control	30.05.01.18.01 TGF-beta-receptor signalling pathway	30.05.02.24 G-protein coupled receptor signalling pathway	32.05.05 virulence, disease factors	16.01 protein binding	16.21.07 NAD/NADP binding
e_gw1.3.1501.1	e_gw1.3.1501.1	e_gw1.3.1501.1	scaffold_3:1748250-1748955	7.90475	65.2692	3.04561	1.12e-09	yes
estExt_Genewise1Plus.C_8_t20171	estExt_Genewise1Plus.C_8_t20171	estExt_Genewise1Plus.C_8_t20171	scaffold_8:906509-907571	1.50333	12.2366	3.02496	3.71e-06	yes
estExt_fgenesh1_pm.C_260090	estExt_fgenesh1_pm.C_260090	estExt_fgenesh1_pm.C_260090	scaffold_26:280729-282260	6.28432	49.6143	2.98093	1.08e-10	yes	138970	IPR003333:Cyclopropane-fatty-acyl-phospholipid synthase	sp|P0A9H7|CFA_ECOLI Cyclopropane-fatty-acyl-phospholipid synthase OS=Escherichia coli (strain K12) GN=cfa PE=1 SV=2:182.57	2.1.1.79:Cyclopropane-fatty-acyl-phospholipid synthase.	KOG1269:SAM-dependent methyltransferases	cyclopropane-fatty-acyl-phospholipid synthase activity:GO:0008825;;lipid biosynthetic process:GO:0008610	01.06 lipid, fatty acid and isoprenoid metabolism N.crassa
estExt_Genewise1.C_19_t20023	estExt_Genewise1.C_19_t20023	estExt_Genewise1.C_19_t20023	scaffold_19:606359-608713	3.43868	26.4246	2.94195	3.33e-11	yes	114133	IPR012132:Glucose-methanol-choline oxidoreductase;;IPR007867:Glucose-methanol-choline oxidoreductase, C-terminal;;IPR000172:Glucose-methanol-choline oxidoreductase, N-terminal	sp|P04841|ALOX_PICAN Alcohol oxidase OS=Pichia angusta GN=MOX PE=3 SV=1:912.909	1.1.99.1:Choline dehydrogenase.	KOG1238:Glucose dehydrogenase/choline dehydrogenase/mandelonitrile lyase (GMC oxidoreductase family)	oxidoreductase activity, acting on CH-OH group of donors:GO:0016614;;FAD binding:GO:0050660;;alcohol metabolic process:GO:0006066;;choline dehydrogenase activity:GO:0008812	01.05 C-compound and carbohydrate metabolism
estExt_fgenesh2_kg.C_210002	estExt_fgenesh2_kg.C_210002	estExt_fgenesh2_kg.C_210002	scaffold_21:33761-35454	5.88909	45.1488	2.93857	1.47e-11	yes	124526	IPR015821:Glycoside hydrolase, family 18, N-terminal;;IPR017853:Glycoside hydrolase, catalytic core;;IPR001223:Glycoside hydrolase, family 18, catalytic domain;;IPR001579:Glycoside hydrolase, chitinase active site;;IPR011583:Chitinase II	sp|P48827|CHI4_TRIHA 42 kDa endochitinase OS=Trichoderma harzianum GN=chit42 PE=1 SV=1:707.597	3.2.1.14:Chitinase.	KOG2806:Chitinase	endochitinase activity:GO:0008843;;hydrolase activity, hydrolyzing O-glycosyl compounds:GO:0004553;;carbohydrate metabolic process:GO:0005975;;chitin catabolic process:GO:0006032;;chitinase activity:GO:0004568	01.05.03 polysaccharide metabolism	01.05.09.07 aminosaccharide catabolism
fgenesh1_pm.21_#_41	fgenesh1_pm.21_#_41	fgenesh1_pm.21_#_41	scaffold_21:141921-143436	8.56216	63.5456	2.89175	5.42e-12	yes	132965	-	-	-	KOG0568:Molecular chaperone (DnaJ superfamily)	-
estExt_fgenesh1_pm.C_50224	estExt_fgenesh1_pm.C_50224	estExt_fgenesh1_pm.C_50224	scaffold_5:751797-753482	34.6685	253.822	2.87212	8.58e-12	yes	136619	IPR005828:General substrate transporter;;IPR007114:Major facilitator superfamily;;IPR003663:Sugar transporter;;IPR016196:MFS general substrate transporter;;IPR005829:Sugar transporter, conserved site	sp|P39932|STL1_YEAST Sugar transporter STL1 OS=Saccharomyces cerevisiae (strain ATCC 204508 / S288c) GN=STL1 PE=1 SV=2:490.73	5.3.1.4:L-arabinose isomerase.	KOG0254:Predicted transporter (major facilitator superfamily)	sugar:hydrogen symporter activity:GO:0005351;;L-arabinose isomerase activity:GO:0008733;;carbohydrate transport:GO:0008643;;transporter activity:GO:0005215;;integral to membrane:GO:0016021;;transport:GO:0006810;;membrane:GO:0016020	20.01.03 C-compound and carbohydrate transport	20.09.18 cellular import	20.03 transport facilities
estExt_Genewise1Plus.C_15_t10124	estExt_Genewise1Plus.C_15_t10124	estExt_Genewise1Plus.C_15_t10124	scaffold_15:197136-200659	8.19902	59.2901	2.85427	2.35e-13	yes	101346	IPR001944:Glycoside hydrolase, family 35;;IPR017853:Glycoside hydrolase, catalytic core	sp|A1D1Z9|BGALA_NEOFI Probable beta-galactosidase A OS=Neosartorya fischeri (strain ATCC 1020 / DSM 3700 / FGSC A1164 / NRRL 181) GN=lacA PE=3 SV=1:1201.04	3.2.1.23:Beta-galactosidase.	KOG0496:Beta-galactosidase	beta-galactosidase activity:GO:0004565;;carbohydrate metabolic process:GO:0005975;;beta-galactosidase complex:GO:0009341	01.05 C-compound and carbohydrate metabolism
estExt_Genewise1Plus.C_11_t20188	estExt_Genewise1Plus.C_11_t20188	estExt_Genewise1Plus.C_11_t20188	scaffold_11:865790-866559	14.5333	104.54	2.84663	1.56e-08	yes
estExt_Genemark1.C_140071	estExt_Genemark1.C_140071	estExt_Genemark1.C_140071	scaffold_14:253869-256407	4.90231	35.0534	2.83802	7.68e-12	yes	25615	IPR005887:Alpha-1,2-mannosidase, putative;;IPR012939:Glycosyl hydrolase 92	-	-	-	-
e_gw1.1.458.1	e_gw1.1.458.1	e_gw1.1.458.1	scaffold_1:3592579-3593908	5.89722	41.2749	2.80716	7.68e-10	yes	67561	IPR000834:Peptidase M14, carboxypeptidase A	sp|P18143|CBPS_STRGR Zinc carboxypeptidase OS=Streptomyces griseus GN=scpD PE=1 SV=2:92.0485	3.4.17.-:Metallocarboxypeptidases.	KOG2650:Zinc carboxypeptidase	zinc ion binding:GO:0008270;;carboxypeptidase A activity:GO:0004182;;proteolysis:GO:0006508
estExt_Genewise1.C_6_t20284	estExt_Genewise1.C_6_t20284	estExt_Genewise1.C_6_t20284	scaffold_6:869248-872363	6.82641	47.1733	2.78877	6.48e-12	yes	109567	IPR001764:Glycoside hydrolase, family 3, N-terminal;;IPR002772:Glycoside hydrolase, family 3, C-terminal;;IPR017853:Glycoside hydrolase, catalytic core	sp|Q4WMU3|BGLF_ASPFU Probable beta-glucosidase F OS=Neosartorya fumigata (strain ATCC MYA-4609 / Af293 / CBS 101355 / FGSC A1100) GN=bglF PE=3 SV=2:1031.17	3.2.1.21:Beta-glucosidase.	-	hydrolase activity, hydrolyzing O-glycosyl compounds:GO:0004553;;carbohydrate metabolic process:GO:0005975;;beta-glucosidase activity:GO:0008422	01.05.02.07 sugar, glucoside, polyol and carboxylate catabolism N.crassa	01.05.03 polysaccharide metabolism
estExt_fgenesh2_kg.C_70088	estExt_fgenesh2_kg.C_70088	estExt_fgenesh2_kg.C_70088	scaffold_7:758701-759442	36.3397	236.997	2.70525	7.01e-12	yes
gm1.2221_g	gm1.2221_g	gm1.2221_g	scaffold_3:1749833-1750526	23.0728	144.18	2.6436	1.01e-09	yes	6665	-	-	-	KOG0118:FOG: RRM domain	-
e_gw1.2.947.1	e_gw1.2.947.1	e_gw1.2.947.1	scaffold_2:516919-517303	3.71686	22.8549	2.62034	0.00438597	yes
e_gw1.11.496.1	e_gw1.11.496.1	e_gw1.11.496.1	scaffold_11:458907-459243	5.43482	33.3001	2.61522	0.00318894	yes	81414	IPR002110:Ankyrin	sp|Q8UVC1|INVS_DANRE Inversin OS=Danio rerio GN=invs PE=2 SV=1:69.3218	-	KOG0504:FOG: Ankyrin repeat	-
estExt_Genewise1Plus.C_210374	estExt_Genewise1Plus.C_210374	estExt_Genewise1Plus.C_210374	scaffold_21:479708-480822	70.9157	433.526	2.61194	6.07e-11	yes	102903	IPR007466:Peptidyl-arginine deiminase, Porphyromonas-type	sp|Q8GWW7|AGUA_ARATH Agmatine deiminase OS=Arabidopsis thaliana GN=AIH PE=1 SV=2:201.06	-	-	-	01.02.02.09 catabolism of nitrogenous compounds
e_gw1.18.334.1	e_gw1.18.334.1	e_gw1.18.334.1	scaffold_18:228035-229500	5.79893	35.0214	2.59438	2.2e-08	yes	86058	IPR000832:GPCR, family 2, secretin-like	sp|Q54U75|CRLA_DICDI Cyclic AMP receptor-like protein A OS=Dictyostelium discoideum GN=crlA PE=2 SV=1:64.6994	-	KOG4193:G protein-coupled receptors	G-protein coupled receptor activity:GO:0004930;;membrane:GO:0016020	30.05.02.24 G-protein coupled receptor signalling pathway N.crassa
e_gw1.7.224.1	e_gw1.7.224.1	e_gw1.7.224.1	scaffold_7:138103-139165	1.44212	8.68239	2.5899	0.000260858	yes	77674	IPR006913:Glutathione-dependent formaldehyde-activating, GFA	-	-	KOG4192:Uncharacterized conserved protein	metabolic process:GO:0008152;;carbon-sulfur lyase activity:GO:0016846
estExt_fgenesh1_pm.C_180132	estExt_fgenesh1_pm.C_180132	estExt_fgenesh1_pm.C_180132	scaffold_18:484381-486336	4.26259	25.5583	2.58399	1.25e-08	yes	138416	IPR004843:Metallophosphoesterase;;IPR006179:5'-Nucleotidase and apyrase;;IPR008334:5'-Nucleotidase, C-terminal	sp|P21589|5NTD_HUMAN 5&apos;-nucleotidase OS=Homo sapiens GN=NT5E PE=1 SV=1:242.276	3.1.3.5:5'-nucleotidase.	KOG4419:5' nucleotidase	IMP-GMP specific 5'-nucleotidase activity:GO:0017175;;5'-nucleotidase activity:GO:0008253;;hydrolase activity:GO:0016787;;nucleotide catabolic process:GO:0009166	01.03.01 purin nucleotide/nucleoside/nucleobase metabolism N.crassa	01.03.04 pyrimidine nucleotide/nucleoside/nucleobase metabolism N.crassa
e_gw1.33.108.1	e_gw1.33.108.1	e_gw1.33.108.1	scaffold_33:137782-138304	2.28004	13.5526	2.57144	0.00163767	yes	91480	IPR000194:ATPase, F1/V1/A1 complex, alpha/beta subunit, nucleotide-binding	-	-	-	proton-transporting two-sector ATPase complex:GO:0016469;;hydrogen ion transmembrane transporter activity:GO:0015078
estExt_Genewise1Plus.C_19_t20059	estExt_Genewise1Plus.C_19_t20059	estExt_Genewise1Plus.C_19_t20059	scaffold_19:641551-643289	1.78606	10.3764	2.53846	8.04e-06	yes	102517	IPR015289:Alpha-L-arabinofuranosidase B, catalytic;;IPR007934:Alpha-L-arabinofuranosidase B;;IPR008985:Concanavalin A-like lectin/glucanase	sp|Q92455|ABF1_TRIRE Alpha-N-arabinofuranosidase OS=Trichoderma reesei GN=abf1 PE=2 SV=1:1010.36	-	-	alpha-N-arabinofuranosidase activity:GO:0046556;;L-arabinose metabolic process:GO:0046373	01.05 C-compound and carbohydrate metabolism
estExt_fgenesh1_pg.C_250006	estExt_fgenesh1_pg.C_250006	estExt_fgenesh1_pg.C_250006	scaffold_25:20201-20978	53.0452	305.433	2.52556	3.6e-11	yes
e_gw1.47.48.1	e_gw1.47.48.1	e_gw1.47.48.1	scaffold_47:54169-54868	3.73351	20.9827	2.4906	3.82e-05	yes	93138	IPR011051:Cupin, RmlC-type	-	-	-	-
estExt_Genemark1.C_100031	estExt_Genemark1.C_100031	estExt_Genemark1.C_100031	scaffold_10:95265-100101	9.11447	51.0358	2.48528	7.09e-10	yes	25104	IPR011050:Pectin lyase fold/virulence factor	sp|P49426|EXG1_COCCA Glucan 1,3-beta-glucosidase OS=Cochliobolus carbonum GN=EXG1 PE=1 SV=1:548.51	-	-	-	01.05.03 polysaccharide metabolism	01.25.01 extracellular polysaccharide degradation N.crassa	32.05.05 virulence, disease factors	32.10.07 degradation / modification of foreign (exogenous) polysaccharides N.crassa	42.27 extracellular / secretion proteins
estExt_fgenesh2_kg.C_440017	estExt_fgenesh2_kg.C_440017	estExt_fgenesh2_kg.C_440017	scaffold_44:78392-79133	2219.22	12242.8	2.46381	6.26e-06	yes	125486	IPR010636:Hydrophobin 2	sp|P79073|HYP2_TRIRE Hydrophobin-2 OS=Trichoderma reesei GN=hfb2 PE=1 SV=1:169.474	-	-	cell communication:GO:0007154;;cell wall:GO:0005618;;extracellular region:GO:0005576
e_gw1.1.2325.1	e_gw1.1.2325.1	e_gw1.1.2325.1	scaffold_1:2750746-2752665	2.80498	15.3502	2.45219	1.03e-06	yes	70100	IPR005198:Glycoside hydrolase, family 76;;IPR008928:Six-hairpin glycosidase-like	sp|P36091|DCW1_YEAST Mannan endo-1,6-alpha-mannosidase DCW1 OS=Saccharomyces cerevisiae (strain ATCC 204508 / S288c) GN=DCW1 PE=1 SV=1:55.4546	-	-	catalytic activity:GO:0003824
e_gw1.1.1853.1	e_gw1.1.1853.1	e_gw1.1.1853.1	scaffold_1:2713418-2714511	11.5551	63.208	2.45157	2.5e-07	yes
estExt_fgenesh2_kg.C_20308	estExt_fgenesh2_kg.C_20308	estExt_fgenesh2_kg.C_20308	scaffold_2:1842909-1843744	10.6178	57.5435	2.43817	1.86e-07	yes	122177	-	-	-	KOG4443:Putative transcription factor HALR/MLL3, involved in embryonic development	-
fgenesh1_pm.20_#_84	fgenesh1_pm.20_#_84	fgenesh1_pm.20_#_84	scaffold_20:284458-285838	5.4455	29.0062	2.41323	3.61e-07	yes	132831	IPR003817:Phosphatidylserine decarboxylase-related	sp|O14111|YEJF_SCHPO C2 domain-containing protein C31G5.15 OS=Schizosaccharomyces pombe (strain ATCC 38366 / 972) GN=SPAC31G5.15 PE=2 SV=1:77.411	-	KOG2419:Phosphatidylserine decarboxylase	phosphatidylserine decarboxylase activity:GO:0004609;;phospholipid biosynthetic process:GO:0008654	01.06 lipid, fatty acid and isoprenoid metabolism N.crassa
e_gw1.2.1974.1	e_gw1.2.1974.1	e_gw1.2.1974.1	scaffold_2:2031716-2033080	5.63414	29.4576	2.38637	1.14e-06	yes	71162	-	-	-	KOG3049:Succinate dehydrogenase, Fe-S protein subunit	-
gw1.19.460.1	gw1.19.460.1	gw1.19.460.1	scaffold_19:128762-129683	2.82992	14.7842	2.38522	8.65e-05	yes
estExt_Genewise1.C_6_t30020	estExt_Genewise1.C_6_t30020	estExt_Genewise1.C_6_t30020	scaffold_6:1130944-1131769	106.896	554.051	2.37381	2.8e-08	yes
estExt_Genemark1.C_270046	estExt_Genemark1.C_270046	estExt_Genemark1.C_270046	scaffold_27:175052-177159	10.488	54.3427	2.37334	4.17e-09	yes	26554	IPR000209:Peptidase S8 and S53, subtilisin, kexin, sedolisin;;IPR009020:Proteinase inhibitor, propeptide;;IPR015366:Peptidase S53, propeptide	sp|Q70GH4|SED3_ASPFU Tripeptidyl-peptidase sed3 OS=Neosartorya fumigata (strain ATCC MYA-4609 / Af293 / CBS 101355 / FGSC A1100) GN=sed3 PE=1 SV=1:347.436	3.4.14.9:Tripeptidyl-peptidase I.	-	serine-type peptidase activity:GO:0008236;;proteolysis:GO:0006508;;tripeptidyl-peptidase I activity:GO:0019131;;subtilase activity:GO:0004289	01.06 lipid, fatty acid and isoprenoid metabolism	14.07.11 protein processing (proteolytic)	14.13 protein/peptide degradation	14.13.04 lysosomal and vacuolar protein degradation	42.25 vacuole or lysosome	16.01 protein binding
gm1.3438_g	gm1.3438_g	gm1.3438_g	scaffold_6:1294845-1296273	11.622	60.0682	2.36975	3.49e-08	yes	7882	IPR016084:Haem oxygenase-like, multi-helical	-	-	-	-
estExt_fgenesh2_kg.C_50002	estExt_fgenesh2_kg.C_50002	estExt_fgenesh2_kg.C_50002	scaffold_5:11116-13451	6.13	30.1011	2.29586	6.23e-08	yes	122639	IPR001764:Glycoside hydrolase, family 3, N-terminal;;IPR002772:Glycoside hydrolase, family 3, C-terminal;;IPR017853:Glycoside hydrolase, catalytic core;;IPR011658:PA14	sp|Q5B6C7|BGLH_EMENI Probable beta-glucosidase H OS=Emericella nidulans GN=bglH PE=3 SV=2:1036.56	3.2.1.21:Beta-glucosidase.	-	hydrolase activity, hydrolyzing O-glycosyl compounds:GO:0004553;;carbohydrate metabolic process:GO:0005975;;beta-glucosidase activity:GO:0008422	01.05.03 polysaccharide metabolism
gm1.6888_g	gm1.6888_g	gm1.6888_g	scaffold_21:72534-74685	2.9679	14.4238	2.28094	2.42e-06	yes	11332	-	sp|Q2GMW8|PRM1_CHAGB Plasma membrane fusion protein PRM1 OS=Chaetomium globosum GN=PRM1 PE=3 SV=1:602.823	-	-	-
e_gw1.3.637.1	e_gw1.3.637.1	e_gw1.3.637.1	scaffold_3:1393043-1393748	17.9855	86.8214	2.27122	1.52e-06	yes	73633	IPR016181:Acyl-CoA N-acyltransferase;;IPR000182:GCN5-related N-acetyltransferase	-	-	-	metabolic process:GO:0008152;;N-acetyltransferase activity:GO:0008080
estExt_fgenesh2_kg.C_180072	estExt_fgenesh2_kg.C_180072	estExt_fgenesh2_kg.C_180072	scaffold_18:526659-527796	19.9387	95.7557	2.26379	2.48e-08	yes	124397	IPR007577:Glycosyltransferase sugar-binding region containing DXD motif	sp|Q9UTR6|OCH1_SCHPO Initiation-specific alpha-1,6-mannosyltransferase OS=Schizosaccharomyces pombe (strain ATCC 38366 / 972) GN=och1 PE=1 SV=2:144.05	-	-	glycolipid 6-alpha-mannosyltransferase activity:GO:0033164
estExt_Genewise1Plus.C_8_t10207	estExt_Genewise1Plus.C_8_t10207	estExt_Genewise1Plus.C_8_t10207	scaffold_8:254350-257159	2.96741	14.2405	2.26272	1.06e-06	yes	98815	IPR010730:Heterokaryon incompatibility	-	-	-	-
fgenesh1_pm.13_#_78	fgenesh1_pm.13_#_78	fgenesh1_pm.13_#_78	scaffold_13:267176-269672	37.7709	177.366	2.23138	1.44e-09	yes	131271	IPR003593:AAA+ ATPase, core;;IPR003959:AAA ATPase, core;;IPR016084:Haem oxygenase-like, multi-helical	sp|Q5T9A4|ATD3B_HUMAN ATPase family AAA domain-containing protein 3B OS=Homo sapiens GN=ATAD3B PE=1 SV=1:74.7146	-	KOG0742:AAA+-type ATPase	ATP binding:GO:0005524;;nucleoside-triphosphatase activity:GO:0017111;;nucleotide binding:GO:0000166
gm1.4129_g	gm1.4129_g	gm1.4129_g	scaffold_8:967529-969925	13.8045	64.5899	2.22617	9.92e-09	yes	8573	IPR002018:Carboxylesterase, type B	sp|P32948|LIP4_CANRU Lipase 4 OS=Candida rugosa GN=LIP4 PE=3 SV=1:398.282	3.1.1.1:Carboxylesterase.	KOG4389:Acetylcholinesterase/Butyrylcholinesterase	carboxylesterase activity:GO:0004091	01.06 lipid, fatty acid and isoprenoid metabolism N.crassa
estExt_fgenesh1_pg.C_1_t20011	estExt_fgenesh1_pg.C_1_t20011	estExt_fgenesh1_pg.C_1_t20011	scaffold_1:1988508-1989560	12.5246	58.4842	2.22329	3.38e-07	yes	139818	IPR007828:Protein of unknown function DUF706	sp|Q8L799|MIOX1_ARATH Inositol oxygenase 1 OS=Arabidopsis thaliana GN=MIOX1 PE=2 SV=1:263.462	1.13.99.1:Myo-inositol oxygenase.	KOG1573:Aldehyde reductase	inositol oxygenase activity:GO:0050113	01.05.02 sugar, glucoside, polyol and carboxylate metabolism	01.05.02.07 sugar, glucoside, polyol and carboxylate catabolism	30.01.09.11 polyphosphoinositol mediated signal transduction	34.11.03.13 osmosensing	42.02 eukaryotic plasma membrane	16.21.07 NAD/NADP binding
estExt_Genewise1Plus.C_14_t10298	estExt_Genewise1Plus.C_14_t10298	estExt_Genewise1Plus.C_14_t10298	scaffold_14:372947-375737	15.3286	69.0354	2.17111	2.02e-08	yes	101105	IPR001382:Glycoside hydrolase, family 47	sp|Q8H116|MNS2_ARATH Mannosyl-oligosaccharide 1,2-alpha-mannosidase MNS2 OS=Arabidopsis thaliana GN=MNS2 PE=1 SV=1:241.891	3.2.1.113:Mannosyl-oligosaccharide 1,2-alpha-mannosidase.	KOG2204:Mannosyl-oligosaccharide alpha-1,2-mannosidase and related glycosyl hydrolases	calcium ion binding:GO:0005509;;membrane:GO:0016020;;mannosyl-oligosaccharide 1,2-alpha-mannosidase activity:GO:0004571	01.05 C-compound and carbohydrate metabolism	01.05.03 polysaccharide metabolism	14.07.02 modification with sugar residues (e.g. glycosylation, deglycosylation) N.crassa
estExt_fgenesh2_kg.C_230016	estExt_fgenesh2_kg.C_230016	estExt_fgenesh2_kg.C_230016	scaffold_23:227169-227910	470.418	2108.35	2.1641	5.45e-07	yes
e_gw1.7.830.1	e_gw1.7.830.1	e_gw1.7.830.1	scaffold_7:571646-572451	6.92341	30.8034	2.15354	8.71e-05	yes	77893	IPR000791:GPR1/FUN34/yaaH	sp|P32907|ATO2_YEAST Ammonia transport outward protein 2 OS=Saccharomyces cerevisiae (strain ATCC 204508 / S288c) GN=ATO2 PE=1 SV=1:120.553	-	-	membrane:GO:0016020	01.02 nitrogen, sulfur and selenium metabolism S.cerevisiae	01.03.16.03 DNA degradation	01.05.25 regulation of C-compound and carbohydrate metabolism S.cerevisiae	10.01 DNA processing	10.03.02 meiosis	20.01.01.01 cation transport (H+, Na+, K+, Ca2+ , NH4+, etc.) S.cerevisiae	20.01.03 C-compound and carbohydrate transport	20.03 transport facilities	20.03.02.03.01 proton driven antiporter
estExt_fgenesh1_pm.C_180153	estExt_fgenesh1_pm.C_180153	estExt_fgenesh1_pm.C_180153	scaffold_18:566685-568179	3.80598	16.7728	2.13978	5.17e-05	yes	138427	-	-	-	KOG1216:von Willebrand factor and related coagulation proteins	-
gw1.3.1434.1	gw1.3.1434.1	gw1.3.1434.1	scaffold_3:824341-825046	3.22462	14.205	2.13919	0.000841354	yes	63472	IPR010730:Heterokaryon incompatibility	sp|Q00808|HETE1_PODAN Vegetative incompatibility protein HET-E-1 OS=Podospora anserina GN=HET-E1 PE=4 SV=1:203.371	-	-	-
fgenesh1_pm.7_#_187	fgenesh1_pm.7_#_187	fgenesh1_pm.7_#_187	scaffold_7:604696-605715	19.1442	83.3752	2.12271	4.42e-06	yes	129514	IPR000425:Major intrinsic protein	sp|P0CD92|AQY1_YEASX Aquaporin-1 OS=Saccharomyces cerevisiae GN=AQY1 PE=2 SV=1:164.466	-	KOG0223:Aquaporin (major intrinsic protein family)	transporter activity:GO:0005215;;transport:GO:0006810;;membrane:GO:0016020	20.09.18.07 non-vesicular cellular import	20.03 transport facilities	20.03.01 channel / pore class transport	20.03.01.01 ion channels
gm1.4837_g	gm1.4837_g	gm1.4837_g	scaffold_11:334413-336249	2.54805	10.9416	2.10235	7.08e-05	yes	9281	-	sp|Q01870|WETA_PENCW Regulatory protein wetA OS=Penicillium chrysogenum (strain ATCC 28089 / DSM 1075 / Wisconsin 54-1255) GN=wetA PE=4 SV=2:87.8113	3.2.1.18:Exo-alpha-sialidase.	KOG1878:Nuclear receptor coregulator SMRT/SMRTER, contains Myb-like domains	exo-alpha-sialidase activity:GO:0004308
estExt_fgenesh1_pm.C_300095	estExt_fgenesh1_pm.C_300095	estExt_fgenesh1_pm.C_300095	scaffold_30:293324-293947	3.70637	15.898	2.10076	0.00272591	yes
e_gw1.3.649.1	e_gw1.3.649.1	e_gw1.3.649.1	scaffold_3:1887027-1888228	9.6884	41.3332	2.09297	5.62e-06	yes	72628	IPR001568:Ribonuclease T2	sp|Q4WXZ5|RNY1_ASPFU Ribonuclease T2-like OS=Neosartorya fumigata (strain ATCC MYA-4609 / Af293 / CBS 101355 / FGSC A1100) GN=rny1 PE=3 SV=2:318.161	3.1.27.1:Ribonuclease T2.	KOG1642:Ribonuclease, T2 family	endoribonuclease activity:GO:0004521;;RNA binding:GO:0003723;;ribonuclease T2 activity:GO:0033897
estExt_Genewise1.C_15_t10236	estExt_Genewise1.C_15_t10236	estExt_Genewise1.C_15_t10236	scaffold_15:331253-332446	135.142	576.228	2.09216	1.25e-08	yes	113012	IPR001424:Superoxide dismutase, copper/zinc binding	sp|Q96VL0|SODC_CLAPU Superoxide dismutase [Cu-Zn] OS=Claviceps purpurea GN=SOD1 PE=3 SV=3:270.781	1.15.1.1:Superoxide dismutase.	KOG0441:Cu2+/Zn2+ superoxide dismutase SOD1	metal ion binding:GO:0046872;;superoxide metabolic process:GO:0006801;;superoxide dismutase activity:GO:0004784	30.01.05.01.03 MAPKKK cascade	32.01.01 oxidative stress response	32.07.07 oxygen and radical detoxification	32.07.07.07 superoxide metabolism	34.01.01.01 homeostasis of metal ions (Na, K, Ca etc.) S.cerevisiae	40.10.02.02.03 disassembly of cell structures	16.17 metal binding	16.17.09 heavy metal binding (Cu, Fe, Zn)	18.02.01.01.05 kinase activator
estExt_fgenesh1_pg.C_210030	estExt_fgenesh1_pg.C_210030	estExt_fgenesh1_pg.C_210030	scaffold_21:131658-133320	5.75427	24.292	2.07778	1.43e-05	yes	142573	-	sp|P53933|APP1_YEAST Actin patch protein 1 OS=Saccharomyces cerevisiae (strain ATCC 204508 / S288c) GN=APP1 PE=1 SV=1:76.2554	-	-	-
fgenesh1_pg.48_#_15	fgenesh1_pg.48_#_15	fgenesh1_pg.48_#_15	scaffold_48:56123-56940	17.4127	72.7074	2.06196	2.13e-05	yes	39912	-	-	-	KOG4157:beta-1,6-N-acetylglucosaminyltransferase, contains WSC domain	-
estExt_Genewise1Plus.C_3_t30487	estExt_Genewise1Plus.C_3_t30487	estExt_Genewise1Plus.C_3_t30487	scaffold_3:1746812-1747566	52.2879	214.167	2.03419	6.66e-07	yes
e_gw1.23.192.1	e_gw1.23.192.1	e_gw1.23.192.1	scaffold_23:427165-428418	46.9037	190.914	2.02515	1.03e-07	yes	88510	IPR002345:Lipocalin;;IPR001395:Aldo/keto reductase	sp|Q09923|YAKC_SCHPO Aldo-keto reductase yakc [NADP+] OS=Schizosaccharomyces pombe (strain ATCC 38366 / 972) GN=yakc PE=1 SV=1:304.679	1.1.1.65:Pyridoxine 4-dehydrogenase.	KOG1575:Voltage-gated shaker-like K+ channel, subunit beta/KCNAB	pyridoxine 4-dehydrogenase activity:GO:0050236;;transporter activity:GO:0005215;;transport:GO:0006810;;binding:GO:0005488;;oxidoreductase activity:GO:0016491	01.05 C-compound and carbohydrate metabolism	01.05.02.07 sugar, glucoside, polyol and carboxylate catabolism B.subtilis	01.07.01 biosynthesis of vitamins, cofactors, and prosthetic groups N.crassa	01.07.03 catabolism of vitamins, cofactors, and prosthetic groups N.crassa	20.01.01.01 cation transport (H+, Na+, K+, Ca2+ , NH4+, etc.)	20.09.18 cellular import	34.01.01 homeostasis of cations	34.01.01.01 homeostasis of metal ions (Na, K, Ca etc.) N.crassa	16.19.03 ATP binding	16.21.07 NAD/NADP binding	18.02 regulation of protein activity	20.03.01 channel / pore class transport	20.03.01.01 ion channels	20.03.25 ABC transporters
gw1.6.545.1	gw1.6.545.1	gw1.6.545.1	scaffold_6:777790-779663	2.23896	8.87252	1.98652	0.000382715	yes	50927	IPR003593:AAA+ ATPase, core;;IPR003959:AAA ATPase, core;;IPR003960:AAA ATPase, conserved site;;IPR014851:BCS1 N terminal	sp|Q54DY9|BCS1B_DICDI Probable mitochondrial chaperone BCS1-B OS=Dictyostelium discoideum GN=bcsl1b PE=3 SV=1:176.407	-	KOG0743:AAA+-type ATPase	ATP binding:GO:0005524;;nucleoside-triphosphatase activity:GO:0017111;;nucleotide binding:GO:0000166
estExt_fgenesh1_pm.C_60404	estExt_fgenesh1_pm.C_60404	estExt_fgenesh1_pm.C_60404	scaffold_6:1236838-1238931	25.2954	99.9602	1.98248	9.9e-07	yes	136860	IPR016161:Aldehyde/histidinol dehydrogenase;;IPR016160:Aldehyde dehydrogenase, conserved site;;IPR001998:Xylose isomerase;;IPR015590:Aldehyde dehydrogenase	sp|P33008|ALDH_PSESP Probable aldehyde dehydrogenase OS=Pseudomonas sp. GN=terPE PE=3 SV=1:308.145	1.2.1.3:Aldehyde dehydrogenase (NAD+).	KOG2450:Aldehyde dehydrogenase	metabolic process:GO:0008152;;carbohydrate metabolic process:GO:0005975;;aldehyde dehydrogenase (NAD) activity:GO:0004029;;oxidoreductase activity:GO:0016491;;xylose isomerase activity:GO:0009045	01.01 amino acid metabolism	01.01.03.02 metabolism of glutamate	01.01.05.01.02 degradation of polyamines	01.05 C-compound and carbohydrate metabolism	01.05.06.07 C-2 compound and organic acid catabolism S.cerevisiae	01.06 lipid, fatty acid and isoprenoid metabolism	01.06.06 isoprenoid metabolism	01.07 metabolism of vitamins, cofactors, and prosthetic groups N.crassa	01.07.01 biosynthesis of vitamins, cofactors, and prosthetic groups	01.20.05 metabolism of acetic acid derivatives	01.20.17.01 metabolism of nonprotein amino acids	01.20.31 metabolism of secondary products derived from L-lysine, L-arginine and L-histidine	02.11 electron transport and membrane-associated energy conservation S.cerevisiae	02.13 respiration	02.16 fermentation	02.16.01 alcohol fermentation	02.45 energy conversion and regeneration	20.01.15 electron transport	32.01 stress response	32.01.03 osmotic and salt stress response	32.05.01 resistance proteins	32.05.03 defense related proteins	32.07.03 detoxification by modification	32.07.09 detoxification by degradation	42.16 mitochondrion	16.13 C-compound binding	16.21.07 NAD/NADP binding
estExt_fgenesh2_kg.C_250024	estExt_fgenesh2_kg.C_250024	estExt_fgenesh2_kg.C_250024	scaffold_25:90271-91673	51.3274	202.615	1.98094	2.73e-07	yes	124851	IPR016040:NAD(P)-binding;;IPR013149:Alcohol dehydrogenase, zinc-binding;;IPR011032:GroES-like	sp|O34812|YFMJ_BACSU Putative NADP-dependent oxidoreductase yfmJ OS=Bacillus subtilis GN=yfmJ PE=2 SV=1:263.077	-	KOG1196:Predicted NAD-dependent oxidoreductase	metabolic process:GO:0008152;;catalytic activity:GO:0003824;;2-alkenal reductase activity:GO:0032440;;binding:GO:0005488	01.05 C-compound and carbohydrate metabolism	01.05.03 polysaccharide metabolism	01.06 lipid, fatty acid and isoprenoid metabolism N.crassa	32.07 detoxification	42.01 cell wall	16.17.09 heavy metal binding (Cu, Fe, Zn)	16.21.07 NAD/NADP binding
estExt_Genewise1.C_1_t60138	estExt_Genewise1.C_1_t60138	estExt_Genewise1.C_1_t60138	scaffold_1:3251524-3252191	13.0647	51.5386	1.97998	0.00012089	yes	106512	IPR007219:Fungal specific transcription factor	-	-	-	nucleus:GO:0005634;;zinc ion binding:GO:0008270;;transcription:GO:0006350;;DNA binding:GO:0003677
fgenesh1_pm.27_#_13	fgenesh1_pm.27_#_13	fgenesh1_pm.27_#_13	scaffold_27:55661-56966	6.95947	26.9422	1.95282	8.63e-05	yes	133809	IPR002328:Alcohol dehydrogenase, zinc-containing, conserved site;;IPR016040:NAD(P)-binding;;IPR013154:Alcohol dehydrogenase GroES-like;;IPR013149:Alcohol dehydrogenase, zinc-binding;;IPR011032:GroES-like	sp|O94038|ADH2_CANAL Alcohol dehydrogenase 2 OS=Candida albicans GN=ADH2 PE=1 SV=1:262.692	1.1.1.1:Alcohol dehydrogenase.	KOG0023:Alcohol dehydrogenase, class V	alcohol dehydrogenase activity, iron-dependent:GO:0004025;;alcohol dehydrogenase activity, metal ion-independent:GO:0004023;;alcohol dehydrogenase activity:GO:0004022;;zinc ion binding:GO:0008270;;metabolic process:GO:0008152;;catalytic activity:GO:0003824;;oxidoreductase activity:GO:0016491;;binding:GO:0005488;;alcohol dehydrogenase activity, zinc-dependent:GO:0004024	01.05 C-compound and carbohydrate metabolism	01.05.06.07 C-2 compound and organic acid catabolism S.cerevisiae	01.06 lipid, fatty acid and isoprenoid metabolism N.crassa	02.01 glycolysis and gluconeogenesis	02.16 fermentation	02.16.01 alcohol fermentation	32.07 detoxification	16.17.09 heavy metal binding (Cu, Fe, Zn)
fgenesh1_pm.2_#_347	fgenesh1_pm.2_#_347	fgenesh1_pm.2_#_347	scaffold_2:1217872-1218271	99.7594	383.416	1.94238	6.33e-06	yes	127022	IPR004360:Glyoxalase/bleomycin resistance protein/dioxygenase	sp|P37479|YYCE_BACSU Uncharacterized protein yycE OS=Bacillus subtilis GN=yycE PE=1 SV=1:120.939	-	-	-
fgenesh1_pg.45_#_14	fgenesh1_pg.45_#_14	fgenesh1_pg.45_#_14	scaffold_45:50016-50490	4.5805	17.5426	1.93728	0.00513064	yes
e_gw1.33.64.1	e_gw1.33.64.1	e_gw1.33.64.1	scaffold_33:11939-12719	2.1814	8.33915	1.93465	0.00627338	yes	91584	IPR005834:Haloacid dehalogenase-like hydrolase	-	-	-	metabolic process:GO:0008152;;catalytic activity:GO:0003824
estExt_Genemark1.C_70138	estExt_Genemark1.C_70138	estExt_Genemark1.C_70138	scaffold_7:500776-501903	74.3411	282.935	1.92824	1.26e-07	yes	24672	IPR011013:Glycoside hydrolase-type carbohydrate-binding;;IPR008183:Aldose 1-epimerase	sp|P04397|GAL10_YEAST Bifunctional protein GAL10 OS=Saccharomyces cerevisiae (strain ATCC 204508 / S288c) GN=GAL10 PE=1 SV=2:201.445	5.1.3.3:Aldose 1-epimerase.	KOG1604:Predicted mutarotase	carbohydrate binding:GO:0030246;;carbohydrate metabolic process:GO:0005975;;aldose 1-epimerase activity:GO:0004034;;catalytic activity:GO:0003824;;isomerase activity:GO:0016853	01.05 C-compound and carbohydrate metabolism	01.05.02 sugar, glucoside, polyol and carboxylate metabolism	16.01 protein binding
gm1.3368_g	gm1.3368_g	gm1.3368_g	scaffold_6:1052830-1055358	9.55708	36.2331	1.92267	4.04e-06	yes	7812	IPR016624:Uncharacterised conserved protein UCP014753	-	-	-	-
e_gw1.11.309.1	e_gw1.11.309.1	e_gw1.11.309.1	scaffold_11:494282-496235	18.4074	69.3553	1.91372	3.48e-06	yes	81383	IPR004147:ABC-1;;IPR011009:Protein kinase-like	sp|O60111|YG62_SCHPO ABC1 family protein C15C4.02 OS=Schizosaccharomyces pombe (strain ATCC 38366 / 972) GN=SPBC15C4.02 PE=2 SV=1:452.981	-	KOG1235:Predicted unusual protein kinase	-	01.04 phosphate metabolism	14.07.03 modification by phosphorylation, dephosphorylation, autophosphorylation &nbsp;
estExt_Genemark1.C_1_t20460	estExt_Genemark1.C_1_t20460	estExt_Genemark1.C_1_t20460	scaffold_1:3404286-3407818	62.3529	234.694	1.91225	1.54e-06	yes	23525	IPR011701:Major facilitator superfamily MFS-1;;IPR016196:MFS general substrate transporter	sp|P39980|SIT1_YEAST Siderophore iron transporter 1 OS=Saccharomyces cerevisiae (strain ATCC 204508 / S288c) GN=SIT1 PE=2 SV=1:374.785	-	KOG0254:Predicted transporter (major facilitator superfamily)	-
e_gw1.8.229.1	e_gw1.8.229.1	e_gw1.8.229.1	scaffold_8:1081645-1082775	132.968	496.01	1.89929	6.62e-07	yes	79514	IPR007087:Zinc finger, C2H2-type;;IPR015880:Zinc finger, C2H2-like	sp|P10069|BRLA_EMENI Regulatory protein brlA OS=Emericella nidulans GN=brlA PE=4 SV=1:59.3066	-	KOG1721:FOG: Zn-finger	nucleic acid binding:GO:0003676;;zinc ion binding:GO:0008270;;intracellular:GO:0005622	11.02.03.04 transcriptional control
estExt_fgenesh1_pg.C_230055	estExt_fgenesh1_pg.C_230055	estExt_fgenesh1_pg.C_230055	scaffold_23:277112-279428	6.3664	23.7057	1.89669	2.03e-05	yes	142712	IPR016137:Regulator of G protein signalling superfamily	-	-	-	-
estExt_fgenesh1_pm.C_400037	estExt_fgenesh1_pm.C_400037	estExt_fgenesh1_pm.C_400037	scaffold_40:106843-109333	22.8252	84.8858	1.89489	7.63e-07	yes	139450	IPR002293:Amino acid/polyamine transporter I;;IPR004841:Amino acid permease-associated region	sp|P53388|DIP5_YEAST Dicarboxylic amino acid permease OS=Saccharomyces cerevisiae (strain ATCC 204508 / S288c) GN=DIP5 PE=1 SV=1:550.821	-	KOG1286:Amino acid transporters	amino acid transmembrane transporter activity:GO:0015171;;transport:GO:0006810;;membrane:GO:0016020;;amino acid transport:GO:0006865	20.01.07 amino acid/amino acid derivatives transport S.cerevisiae	20.09.18.07 non-vesicular cellular import
estExt_Genemark1.C_100013	estExt_Genemark1.C_100013	estExt_Genemark1.C_100013	scaffold_10:38894-42171	21.2884	79.1524	1.89456	2.45e-07	yes	25095	IPR001764:Glycoside hydrolase, family 3, N-terminal;;IPR002772:Glycoside hydrolase, family 3, C-terminal;;IPR017853:Glycoside hydrolase, catalytic core	sp|Q0CTD7|BGLA_ASPTN Probable beta-glucosidase A OS=Aspergillus terreus (strain NIH 2624 / FGSC A1156) GN=bglA PE=3 SV=1:996.112	3.2.1.21:Beta-glucosidase.	-	hydrolase activity, hydrolyzing O-glycosyl compounds:GO:0004553;;carbohydrate metabolic process:GO:0005975;;beta-glucosidase activity:GO:0008422	01.05.02.07 sugar, glucoside, polyol and carboxylate catabolism N.crassa	01.05.03 polysaccharide metabolism
fgenesh2_kg.14_#_101_#_gi|30121662|gb|CB907004.1|CB907004	fgenesh2_kg.14_#_101_#_gi|30121662|gb|CB907004.1|CB907004	fgenesh2_kg.14_#_101_#_gi|30121662|gb|CB907004.1|CB907004	scaffold_14:705227-705823	21.8936	81.2766	1.89233	9.73e-05	yes
fgenesh1_pm.5_#_329	fgenesh1_pm.5_#_329	fgenesh1_pm.5_#_329	scaffold_5:1190078-1191292	3.38678	12.5618	1.89106	0.000980729	yes	128791	IPR013094:Alpha/beta hydrolase fold-3	sp|Q5UQ83|YR526_MIMIV Putative alpha/beta hydrolase R526 OS=Acanthamoeba polyphaga mimivirus GN=MIMI_R526 PE=1 SV=1:56.6102	-	-	metabolic process:GO:0008152;;hydrolase activity:GO:0016787	01.06 lipid, fatty acid and isoprenoid metabolism N.crassa
estExt_Genewise1.C_3_t40101	estExt_Genewise1.C_3_t40101	estExt_Genewise1.C_3_t40101	scaffold_3:1864460-1864977	429.578	1590.26	1.88827	1.73e-06	yes
e_gw1.4.1179.1	e_gw1.4.1179.1	e_gw1.4.1179.1	scaffold_4:1503765-1504701	12.1353	44.9122	1.88789	0.000113662	yes	74816	IPR009906:Protein of unknown function DUF1445	sp|Q09674|YA01_SCHPO UPF0317 protein C5H10.01 OS=Schizosaccharomyces pombe (strain ATCC 38366 / 972) GN=SPAC5H10.01 PE=2 SV=1:243.817	-	-	-
estExt_fgenesh1_pm.C_290060	estExt_fgenesh1_pm.C_290060	estExt_fgenesh1_pm.C_290060	scaffold_29:221452-222719	114.274	422.78	1.88741	1.2e-06	yes	139147	IPR011009:Protein kinase-like	-	-	-	-
e_gw1.30.357.1	e_gw1.30.357.1	e_gw1.30.357.1	scaffold_30:179042-180524	4.13636	15.0953	1.86767	0.000404568	yes	90737	-	sp|Q5UQ60|YL662_MIMIV Uncharacterized protein L662 OS=Acanthamoeba polyphaga mimivirus GN=MIMI_L662 PE=4 SV=1:70.8626	-	-	-
e_gw1.10.15.1	e_gw1.10.15.1	e_gw1.10.15.1	scaffold_10:934569-936077	19.7307	71.9334	1.86622	4.36e-06	yes
estExt_Genemark1.C_110150	estExt_Genemark1.C_110150	estExt_Genemark1.C_110150	scaffold_11:534526-535504	12.7697	46.4899	1.86419	9.94e-05	yes
e_gw1.7.78.1	e_gw1.7.78.1	e_gw1.7.78.1	scaffold_7:197478-198017	25.8057	93.0539	1.85038	0.000294219	yes
estExt_Genewise1Plus.C_210115	estExt_Genewise1Plus.C_210115	estExt_Genewise1Plus.C_210115	scaffold_21:146645-148714	90.8997	324.066	1.83394	2.52e-06	yes	102793	IPR007114:Major facilitator superfamily;;IPR011701:Major facilitator superfamily MFS-1;;IPR016196:MFS general substrate transporter	sp|Q9C101|YKT8_SCHPO Uncharacterized MFS-type transporter PB1E7.08c OS=Schizosaccharomyces pombe (strain ATCC 38366 / 972) GN=SPAPB1E7.08c PE=1 SV=1:365.54	-	KOG0253:Synaptic vesicle transporter SV2 (major facilitator superfamily)	transporter activity:GO:0005215;;integral to membrane:GO:0016021;;transport:GO:0006810
e_gw1.3.170.1	e_gw1.3.170.1	e_gw1.3.170.1	scaffold_3:1378760-1379273	8.46033	30.0595	1.82904	0.00930972	yes
estExt_fgenesh2_kg.C_110140	estExt_fgenesh2_kg.C_110140	estExt_fgenesh2_kg.C_110140	scaffold_11:837718-838560	3.02375	10.6759	1.81995	0.00583628	yes
estExt_Genemark1.C_200159	estExt_Genemark1.C_200159	estExt_Genemark1.C_200159	scaffold_20:589338-591355	25.2409	88.3368	1.80725	1.87e-06	yes	26187	IPR000577:Carbohydrate kinase, FGGY	sp|A1DEK3|XKS1_NEOFI Probable D-xylulose kinase A OS=Neosartorya fischeri (strain ATCC 1020 / DSM 3700 / FGSC A1164 / NRRL 181) GN=xkiA PE=2 SV=1:686.797	2.7.1.17:Xylulokinase.	KOG2531:Sugar (pentulose and hexulose) kinases	xylulokinase activity:GO:0004856;;carbohydrate metabolic process:GO:0005975	01.04 phosphate metabolism	01.05 C-compound and carbohydrate metabolism	01.05.02.07 sugar, glucoside, polyol and carboxylate catabolism S.cerevisiae	16.19.03 ATP binding
estExt_Genewise1.C_13_t10204	estExt_Genewise1.C_13_t10204	estExt_Genewise1.C_13_t10204	scaffold_13:238840-242743	87.553	305.732	1.80404	4.37e-05	yes	112350	IPR008973:C2 calcium/lipid-binding region, CaLB;;IPR000008:C2 calcium-dependent membrane targeting;;IPR006035:Ureohydrolase	sp|Q9USG8|MU190_SCHPO Meiotically up-regulated gene 190 protein OS=Schizosaccharomyces pombe (strain ATCC 38366 / 972) GN=mug190 PE=1 SV=1:443.351	-	KOG1012:Ca2+-dependent lipid-binding protein CLB1/vesicle protein vp115/Granuphilin A, contains C2 domain	metal ion binding:GO:0046872;;hydrolase activity, acting on carbon-nitrogen (but not peptide) bonds, in linear amidines:GO:0016813
estExt_Genewise1.C_14_t10433	estExt_Genewise1.C_14_t10433	estExt_Genewise1.C_14_t10433	scaffold_14:584406-585686	33.1968	114.603	1.78753	7.83e-06	yes	112810	IPR016040:NAD(P)-binding;;IPR002347:Glucose/ribitol dehydrogenase;;IPR002198:Short-chain dehydrogenase/reductase SDR	sp|Q9ERI6|RDH14_MOUSE Retinol dehydrogenase 14 OS=Mus musculus GN=Rdh14 PE=1 SV=1:87.8113	1.1.-.-:Acting on the CH-OH group of donors.	KOG1208:Dehydrogenases with different specificities (related to short-chain alcohol dehydrogenases)	ketoreductase activity:GO:0045703;;hydroxymethylmethylsilanediol oxidase activity:GO:0018448;;1-phenylethanol dehydrogenase activity:GO:0018449;;metabolic process:GO:0008152;;catalytic activity:GO:0003824;;myrtenol dehydrogenase activity:GO:0018450;;oxidoreductase activity:GO:0016491;;binding:GO:0005488;;pinocarveol dehydrogenase activity:GO:0018446;;chloral hydrate dehydrogenase activity:GO:0018…	01.07 metabolism of vitamins, cofactors, and prosthetic groups	34.11.01 photoperception and response
e_gw1.2.1449.1	e_gw1.2.1449.1	e_gw1.2.1449.1	scaffold_2:434884-435611	8.45014	28.8387	1.77096	0.00379785	yes	72228	IPR008278:4'-phosphopantetheinyl transferase;;IPR004568:Phosphopantethiene-protein transferase	-	-	-	macromolecule biosynthetic process:GO:0009059;;fatty acid biosynthetic process:GO:0006633;;magnesium ion binding:GO:0000287;;phosphopantetheinyltransferase activity:GO:0008897
fgenesh1_pg.14_#_164	fgenesh1_pg.14_#_164	fgenesh1_pg.14_#_164	scaffold_14:646556-648479	3.63727	12.4024	1.76969	0.000780168	yes	36885	IPR011707:Multicopper oxidase, type 3;;IPR011706:Multicopper oxidase, type 2;;IPR001117:Multicopper oxidase, type 1;;IPR002355:Multicopper oxidase, copper-binding site;;IPR008972:Cupredoxin	sp|Q96WM9|LAC2_BOTFU Laccase-2 OS=Botryotinia fuckeliana GN=lcc2 PE=2 SV=1:339.732	1.10.3.2:Laccase.	KOG1263:Multicopper oxidases	copper ion binding:GO:0005507;;oxidoreductase activity:GO:0016491;;laccase activity:GO:0008471	01.05.11.04 aromate anabolism	01.05.11.07.01 aerobic aromate catabolism	01.25.09 extracellular lignin degradation	32.07.09 detoxification by degradation
estExt_fgenesh1_pm.C_110262	estExt_fgenesh1_pm.C_110262	estExt_fgenesh1_pm.C_110262	scaffold_11:917010-918231	24.3323	82.8137	1.767	1.31e-05	yes	137683	-	sp|Q5A360|SIL1_CANAL Nucleotide exchange factor SIL1 OS=Candida albicans GN=SIL1 PE=3 SV=1:93.9745	-	KOG2160:Armadillo/beta-catenin-like repeat-containing protein	-	14.04 protein targeting, sorting and translocation N.crassa
e_gw1.16.253.1	e_gw1.16.253.1	e_gw1.16.253.1	scaffold_16:501059-501590	19.9238	67.5218	1.76086	0.00985212	yes
e_gw1.28.98.1	e_gw1.28.98.1	e_gw1.28.98.1	scaffold_28:215790-217281	3.12603	10.5613	1.75639	0.00258004	yes	90399	-	-	-	KOG1187:Serine/threonine protein kinase	-
estExt_Genewise1Plus.C_260159	estExt_Genewise1Plus.C_260159	estExt_Genewise1Plus.C_260159	scaffold_26:207913-208816	63.0066	209.592	1.73401	8.56e-06	yes	103634	IPR006620:Prolyl 4-hydroxylase, alpha subunit;;IPR005123:2OG-Fe(II) oxygenase	-	-	-	protein metabolic process:GO:0019538;;oxidoreductase activity, acting on paired donors, with incorporation or reduction of molecular oxygen, 2-oxoglutarate as one donor, and incorporation of one atom each of oxygen into both donors:GO:0016706
estExt_Genewise1Plus.C_11_t10108	estExt_Genewise1Plus.C_11_t10108	estExt_Genewise1Plus.C_11_t10108	scaffold_11:148967-150389	141.802	468.644	1.72462	1.07e-05	yes	99979	-	-	-	KOG4597:Serine proteinase inhibitor (KU family) with thrombospondin repeats	-
estExt_Genewise1Plus.C_5_t10307	estExt_Genewise1Plus.C_5_t10307	estExt_Genewise1Plus.C_5_t10307	scaffold_5:355367-357447	39.352	128.527	1.70756	2.97e-06	yes	97308	IPR013027:FAD-dependent pyridine nucleotide-disulphide oxidoreductase;;IPR002938:Monooxygenase, FAD-binding;;IPR001327:Pyridine nucleotide-disulphide oxidoreductase, NAD-binding region;;IPR001100:Pyridine nucleotide-disulphide oxidoreductase, class I	sp|Q9FVQ0|YUC10_ARATH Flavin-containing monooxygenase YUCCA10 OS=Arabidopsis thaliana GN=YUC10 PE=2 SV=1:132.494	-	KOG1399:Flavin-containing monooxygenase	aromatic compound metabolic process:GO:0006725;;FAD binding:GO:0050660;;electron transport:GO:0006118;;monooxygenase activity:GO:0004497;;oxidoreductase activity:GO:0016491
estExt_fgenesh1_pm.C_380039	estExt_fgenesh1_pm.C_380039	estExt_fgenesh1_pm.C_380039	scaffold_38:107802-109836	3.16656	10.3185	1.70425	0.00142362	yes	139407	IPR007312:Phosphoesterase	sp|Q9RGS8|PHLN_BURPS Non-hemolytic phospholipase C OS=Burkholderia pseudomallei GN=plcN PE=1 SV=2:253.832	-	-	hydrolase activity, acting on ester bonds:GO:0016788
gm1.6630_g	gm1.6630_g	gm1.6630_g	scaffold_19:442059-442677	14.2175	45.7439	1.68591	0.00227219	yes
estExt_Genewise1.C_16_t10169	estExt_Genewise1.C_16_t10169	estExt_Genewise1.C_16_t10169	scaffold_16:213632-214517	42.9663	137.699	1.68024	6.08e-05	yes	113236	-	-	-	KOG2806:Chitinase	-
estExt_Genemark1.C_80189	estExt_Genemark1.C_80189	estExt_Genemark1.C_80189	scaffold_8:740895-743854	5.33206	17.0577	1.67766	0.000294167	yes	24911	IPR000504:RNA recognition motif, RNP-1;;IPR006569:Regulation of nuclear pre-mRNA protein;;IPR008942:ENTH/VHS	sp|Q9UTE3|SEB1_SCHPO Rpb7-binding protein seb1 OS=Schizosaccharomyces pombe (strain ATCC 38366 / 972) GN=seb1 PE=1 SV=3:296.204	-	KOG0132:RNA polymerase II C-terminal domain-binding protein RA4, contains RPR and RRM domains	nucleic acid binding:GO:0003676	11.02.03.01 general transcription activities
fgenesh1_pm.2_#_590	fgenesh1_pm.2_#_590	fgenesh1_pm.2_#_590	scaffold_2:2033224-2033500	70.2101	223.028	1.66747	0.00374312	yes
e_gw1.13.570.1	e_gw1.13.570.1	e_gw1.13.570.1	scaffold_13:594763-595047	5943.38	18876.2	1.66721	1.35e-05	yes	83227	-	sp|P22151|GRG1_NEUCR Glucose-repressible gene protein OS=Neurospora crassa GN=grg-1 PE=2 SV=1:72.7886	-	-	-
estExt_Genewise1Plus.C_19_t10415	estExt_Genewise1Plus.C_19_t10415	estExt_Genewise1Plus.C_19_t10415	scaffold_19:497791-499362	33.8387	106.939	1.66004	1.59e-05	yes
gm1.4076_g	gm1.4076_g	gm1.4076_g	scaffold_8:762898-763468	30.8145	97.3541	1.65963	0.000980729	yes
estExt_fgenesh2_kg.C_30017	estExt_fgenesh2_kg.C_30017	estExt_fgenesh2_kg.C_30017	scaffold_3:68192-70550	9.98787	31.5182	1.65794	0.000127653	yes	122299	IPR001382:Glycoside hydrolase, family 47	sp|Q12563|MNS1B_ASPSA Mannosyl-oligosaccharide alpha-1,2-mannosidase 1B OS=Aspergillus saitoi GN=mns1B PE=2 SV=1:527.709	3.2.1.113:Mannosyl-oligosaccharide 1,2-alpha-mannosidase.	KOG2431:1, 2-alpha-mannosidase	calcium ion binding:GO:0005509;;membrane:GO:0016020;;mannosyl-oligosaccharide 1,2-alpha-mannosidase activity:GO:0004571	01.05 C-compound and carbohydrate metabolism	14.07.02 modification with sugar residues (e.g. glycosylation, deglycosylation) N.crassa	14.07.02.02 N-directed glycosylation, deglycosylation S.cerevisiae
fgenesh2_kg.4_#_70_#_gi|30111154|gb|CB896496.1|CB896496	fgenesh2_kg.4_#_70_#_gi|30111154|gb|CB896496.1|CB896496	fgenesh2_kg.4_#_70_#_gi|30111154|gb|CB896496.1|CB896496	scaffold_4:883632-884137	564.109	1767.76	1.64788	3.88e-05	yes
gw1.7.312.1	gw1.7.312.1	gw1.7.312.1	scaffold_7:989963-990572	8.41946	26.2535	1.64071	0.00543547	yes
estExt_Genewise1.C_350065	estExt_Genewise1.C_350065	estExt_Genewise1.C_350065	scaffold_35:83599-84968	41.2394	128.41	1.63866	3.31e-05	yes	116206	IPR003042:Aromatic-ring hydroxylase;;IPR006076:FAD dependent oxidoreductase	sp|Q11058|Y1260_MYCTU Uncharacterized protein Rv1260/MT1298 OS=Mycobacterium tuberculosis GN=Rv1260 PE=4 SV=1:140.584	-	KOG2614:Kynurenine 3-monooxygenase and related flavoprotein monooxygenases	metabolic process:GO:0008152;;oxidoreductase activity:GO:0016491
e_gw1.4.199.1	e_gw1.4.199.1	e_gw1.4.199.1	scaffold_4:752849-753224	65.8046	204.508	1.6359	0.00415172	yes
e_gw1.25.184.1	e_gw1.25.184.1	e_gw1.25.184.1	scaffold_25:46245-47273	244.959	753.202	1.6205	0.000175829	yes	89116	-	-	-	KOG0439:VAMP-associated protein involved in inositol metabolism	-
fgenesh1_pm.11_#_44	fgenesh1_pm.11_#_44	fgenesh1_pm.11_#_44	scaffold_11:151967-152582	16.0552	49.2012	1.61565	0.00397696	yes
estExt_Genemark1.C_90201	estExt_Genemark1.C_90201	estExt_Genemark1.C_90201	scaffold_9:785820-787148	3.34483	10.2152	1.61072	0.00525661	yes	25062	IPR011059:Metal-dependent hydrolase, composite;;IPR006680:Amidohydrolase 1	sp|P40896|YJV3_YEAST Uncharacterized protein YJL213W OS=Saccharomyces cerevisiae (strain ATCC 204508 / S288c) GN=YJL213W PE=2 SV=1:342.428	-	-	hydrolase activity, acting on carbon-nitrogen (but not peptide) bonds:GO:0016810;;hydrolase activity:GO:0016787
estExt_fgenesh2_kg.C_350004	estExt_fgenesh2_kg.C_350004	estExt_fgenesh2_kg.C_350004	scaffold_35:38710-41696	76.3187	232.277	1.60574	2.27e-05	yes
e_gw1.5.616.1	e_gw1.5.616.1	e_gw1.5.616.1	scaffold_5:106018-106594	52.8423	159.489	1.59369	0.000640383	yes	75852	IPR001763:Rhodanese-like	sp|Q06597|ARR2_YEAST Arsenical-resistance protein 2 OS=Saccharomyces cerevisiae (strain ATCC 204508 / S288c) GN=ARR2 PE=1 SV=1:53.1434	-	KOG3772:M-phase inducer phosphatase	-
e_gw1.24.90.1	e_gw1.24.90.1	e_gw1.24.90.1	scaffold_24:394895-396035	12.9526	39.0773	1.59309	0.000808426	yes	88640	-	sp|Q5UQ60|YL662_MIMIV Uncharacterized protein L662 OS=Acanthamoeba polyphaga mimivirus GN=MIMI_L662 PE=4 SV=1:84.3445	-	-	-
e_gw1.3.119.1	e_gw1.3.119.1	e_gw1.3.119.1	scaffold_3:1740919-1745376	3.92055	11.7854	1.58787	0.000917272	yes	73644	-	-	6.3.2.19:Ubiquitin--protein ligase.	KOG2748:Uncharacterized conserved protein, contains chromo domain	negative regulation of ubiquitin-protein ligase activity:GO:0051444;;regulation of ubiquitin-protein ligase activity during meiotic cell cycle:GO:0051440;;regulation of ubiquitin-protein ligase activity:GO:0051438;;ubiquitin-protein ligase activity:GO:0004842;;positive regulation of ubiquitin-protein ligase activity:GO:0051443
estExt_Genewise1Plus.C_13_t10407	estExt_Genewise1Plus.C_13_t10407	estExt_Genewise1Plus.C_13_t10407	scaffold_13:545031-547841	5.06406	15.1528	1.58122	0.00101452	yes	100837	IPR005200:Glycoside hydrolase, family 81	sp|Q09850|ENG2_SCHPO Putative endo-1,3(4)-beta-glucanase 2 OS=Schizosaccharomyces pombe (strain ATCC 38366 / 972) GN=eng2 PE=2 SV=1:521.546	-	KOG2254:Predicted endo-1,3-beta-glucanase	-	01.05 C-compound and carbohydrate metabolism	01.05.03 polysaccharide metabolism	14.10 assembly of protein complexes	40.01 cell growth / morphogenesis	42.04.03 actin cytoskeleton	43.01.03.05 budding, cell polarity and filament formation S.cerevisiae
e_gw1.14.499.1	e_gw1.14.499.1	e_gw1.14.499.1	scaffold_14:111970-113745	13.1662	39.3937	1.58112	0.000185121	yes	83445	IPR001382:Glycoside hydrolase, family 47	sp|Q9UKM7|MA1B1_HUMAN Endoplasmic reticulum mannosyl-oligosaccharide 1,2-alpha-mannosidase OS=Homo sapiens GN=MAN1B1 PE=1 SV=2:248.054	3.2.1.113:Mannosyl-oligosaccharide 1,2-alpha-mannosidase.	KOG2431:1, 2-alpha-mannosidase	calcium ion binding:GO:0005509;;membrane:GO:0016020;;mannosyl-oligosaccharide 1,2-alpha-mannosidase activity:GO:0004571	01.05 C-compound and carbohydrate metabolism	01.05.03 polysaccharide metabolism	14.07.02 modification with sugar residues (e.g. glycosylation, deglycosylation) N.crassa
estExt_Genewise1Plus.C_8_t10238	estExt_Genewise1Plus.C_8_t10238	estExt_Genewise1Plus.C_8_t10238	scaffold_8:284908-287926	15.2024	45.4705	1.58063	3.43e-05	yes	98836	IPR009007:Peptidase aspartic, catalytic	-	-	KOG1187:Serine/threonine protein kinase	aspartic-type endopeptidase activity:GO:0004190;;proteolysis:GO:0006508
fgenesh1_pg.6_#_331	fgenesh1_pg.6_#_331	fgenesh1_pg.6_#_331	scaffold_6:1149229-1149675	566.697	1681.26	1.56889	5.21e-05	yes
estExt_fgenesh1_pm.C_290071	estExt_fgenesh1_pm.C_290071	estExt_fgenesh1_pm.C_290071	scaffold_29:262285-262915	833.332	2467.99	1.56637	0.000628757	yes
gm1.3179_g	gm1.3179_g	gm1.3179_g	scaffold_6:420973-422808	2.63682	7.80751	1.56607	0.00888763	yes	7623	IPR005828:General substrate transporter;;IPR007114:Major facilitator superfamily;;IPR003663:Sugar transporter;;IPR016196:MFS general substrate transporter;;IPR005829:Sugar transporter, conserved site	sp|P53387|KHT2_KLULA Hexose transporter 2 OS=Kluyveromyces lactis (strain ATCC 8585 / CBS 2359 / DSM 70799 / NBRC 1267 / NRRL Y-1140 / WM37) GN=KHT2 PE=3 SV=1:410.609	5.3.1.4:L-arabinose isomerase.	KOG0254:Predicted transporter (major facilitator superfamily)	sugar:hydrogen symporter activity:GO:0005351;;L-arabinose isomerase activity:GO:0008733;;carbohydrate transport:GO:0008643;;transporter activity:GO:0005215;;integral to membrane:GO:0016021;;transport:GO:0006810;;membrane:GO:0016020	01.05 C-compound and carbohydrate metabolism	01.05.25 regulation of C-compound and carbohydrate metabolism N.crassa	20.01.03 C-compound and carbohydrate transport	20.01.03.01 sugar transport	20.09.16 cellular export and secretion	20.09.18 cellular import	20.09.18.07 non-vesicular cellular import	34.11.12 perception of nutrients and nutritional adaptation N.crassa	20.03 transport facilities
fgenesh1_pg.55_#_1	fgenesh1_pg.55_#_1	fgenesh1_pg.55_#_1	scaffold_55:925-2380	15.4877	45.6911	1.56079	0.000417174	yes	40002	IPR000560:Histidine acid phosphatase	sp|Q54PR9|CF60_DICDI Counting factor 60 OS=Dictyostelium discoideum GN=cf60 PE=1 SV=1:88.9669	3.1.3.2:Acid phosphatase.	KOG3672:Histidine acid phosphatase	acid phosphatase activity:GO:0003993
e_gw1.7.911.1	e_gw1.7.911.1	e_gw1.7.911.1	scaffold_7:973867-975598	132.399	388.592	1.55336	8.98e-05	yes	77989	IPR017853:Glycoside hydrolase, catalytic core;;IPR001360:Glycoside hydrolase, family 1	sp|Q25BW4|BGL1B_PHACH Beta-glucosidase 1B OS=Phanerochaete chrysosporium GN=BGL1B PE=1 SV=1:495.738	3.2.1.-:Glycosidases, i.e. enzymes hydrolyzing O- and S-glycosyl	KOG0626:Beta-glucosidase, lactase phlorizinhydrolase, and related proteins	hydrolase activity, hydrolyzing O-glycosyl compounds:GO:0004553;;carbohydrate metabolic process:GO:0005975;;glucosidase activity:GO:0015926;;mannosyl-oligosaccharide mannosidase activity:GO:0015924;;galactosidase activity:GO:0015925;;lytic transglycosylase activity:GO:0008933;;amylase activity:GO:0016160;;hexosaminidase activity:GO:0015929;;fucosidase activity:GO:0015928;;trehalase activity:GO:00…	01.05 C-compound and carbohydrate metabolism	01.05.02.04 sugar, glucoside, polyol and carboxylate anabolism L.innocua	01.05.02.07 sugar, glucoside, polyol and carboxylate catabolism N.crassa	01.05.03 polysaccharide metabolism	01.20.01.07 metabolism of glycosides	02.01 glycolysis and gluconeogenesis	32.05.03 defense related proteins
fgenesh1_pg.34_#_25	fgenesh1_pg.34_#_25	fgenesh1_pg.34_#_25	scaffold_34:67959-69513	4.01733	11.789	1.55313	0.00556469	yes	39427	IPR003042:Aromatic-ring hydroxylase;;IPR002938:Monooxygenase, FAD-binding	sp|Q53552|NHG2_PSEPU Salicylate hydroxylase OS=Pseudomonas putida GN=nahG PE=4 SV=1:209.534	1.14.13.1:Salicylate 1-monooxygenase.	KOG2614:Kynurenine 3-monooxygenase and related flavoprotein monooxygenases	metabolic process:GO:0008152;;aromatic compound metabolic process:GO:0006725;;salicylate 1-monooxygenase activity:GO:0018658;;electron transport:GO:0006118;;oxidoreductase activity:GO:0016491;;monooxygenase activity:GO:0004497	01.20 secondary metabolism
estExt_Genewise1Plus.C_1_t40106	estExt_Genewise1Plus.C_1_t40106	estExt_Genewise1Plus.C_1_t40106	scaffold_1:2067717-2068267	548.89	1608.78	1.55138	8.44e-05	yes
gm1.3544_g	gm1.3544_g	gm1.3544_g	scaffold_7:222987-224261	6.43608	18.8571	1.55086	0.00337738	yes	7988	IPR002629:Methionine synthase, vitamin-B12 independent	sp|P42319|YXJH_BACSU Uncharacterized protein yxjH OS=Bacillus subtilis GN=yxjH PE=4 SV=4:239.965	-	-	methionine biosynthetic process:GO:0009086;;5-methyltetrahydropteroyltriglutamate-homocysteine S-methyltransferase activity:GO:0003871	01.01.06.05.01 biosynthesis of methionine	14.07.09 posttranslational modification of amino acids (e.g. hydroxylation, methylation) L.innocua
estExt_fgenesh2_kg.C_300033	estExt_fgenesh2_kg.C_300033	estExt_fgenesh2_kg.C_300033	scaffold_30:175421-177095	301.924	882.693	1.54773	0.00374888	yes	125145	IPR013118:Mannitol dehydrogenase, C-terminal;;IPR016040:NAD(P)-binding;;IPR013131:Mannitol dehydrogenase, N-terminal;;IPR008927:6-phosphogluconate dehydrogenase, C-terminal-like;;IPR000669:Mannitol dehydrogenase, core	sp|Q7SA44|MTLD_NEUCR Mannitol-1-phosphate 5-dehydrogenase OS=Neurospora crassa GN=NCU07318 PE=3 SV=1:611.683	-	-	metabolic process:GO:0008152;;coenzyme binding:GO:0050662;;catalytic activity:GO:0003824;;binding:GO:0005488;;oxidoreductase activity:GO:0016491	01.05 C-compound and carbohydrate metabolism	20.03.09 phosphotransferase system
estExt_fgenesh1_pm.C_3_t10439	estExt_fgenesh1_pm.C_3_t10439	estExt_fgenesh1_pm.C_3_t10439	scaffold_3:1454035-1455623	77.614	226.864	1.54744	2.93e-05	yes	136288	IPR002657:Bile acid:sodium symporter;;IPR004706:Arsenical-resistance protein ACR3	sp|P45946|ARSB_BACSU Arsenite resistance protein ArsB OS=Bacillus subtilis GN=arsB PE=3 SV=2:285.804	-	-	bile acid:sodium symporter activity:GO:0008508;;integral to membrane:GO:0016021;;sodium ion transport:GO:0006814;;membrane:GO:0016020
e_gw1.4.1166.1	e_gw1.4.1166.1	e_gw1.4.1166.1	scaffold_4:891062-891617	317.705	926.741	1.54448	0.000120106	yes
estExt_Genemark1.C_130024	estExt_Genemark1.C_130024	estExt_Genemark1.C_130024	scaffold_13:98267-99713	22.6306	65.9935	1.54405	0.000141941	yes	25477	IPR007484:Peptidase M28	sp|Q90YA8|QPCT_GLOBL Glutaminyl-peptide cyclotransferase OS=Gloydius blomhoffii GN=QPCT PE=2 SV=1:216.853	2.3.2.5:Glutaminyl-peptide cyclotransferase.	KOG3946:Glutaminyl cyclase	peptidase activity:GO:0008233;;glutaminyl-peptide cyclotransferase activity:GO:0016603;;proteolysis:GO:0006508	14.07 protein modification	14.07.09 posttranslational modification of amino acids (e.g. hydroxylation, methylation) N.crassa	14.13 protein/peptide degradation
estExt_Genewise1Plus.C_1_t30008	estExt_Genewise1Plus.C_1_t30008	estExt_Genewise1Plus.C_1_t30008	scaffold_1:1335926-1337460	14.1437	41.1429	1.54049	0.000594895	yes	94181	IPR013657:UAA transporter	sp|Q5B5W2|HUT1_EMENI UDP-galactose transporter homolog 1 OS=Emericella nidulans GN=hut1 PE=3 SV=1:414.075	-	KOG1581:UDP-galactose transporter related protein	-	20.01.03 C-compound and carbohydrate transport	20.01.03.01 sugar transport
gm1.3367_g	gm1.3367_g	gm1.3367_g	scaffold_6:1047668-1050084	40.805	118.196	1.53436	3.69e-05	yes	7811	IPR005828:General substrate transporter;;IPR007114:Major facilitator superfamily;;IPR003663:Sugar transporter;;IPR016196:MFS general substrate transporter;;IPR005829:Sugar transporter, conserved site	sp|A2QQV6|QUTD_ASPNC Probable quinate permease OS=Aspergillus niger (strain CBS 513.88 / FGSC A1513) GN=qutD PE=3 SV=1:309.686	5.3.1.4:L-arabinose isomerase.	KOG0254:Predicted transporter (major facilitator superfamily)	sugar:hydrogen symporter activity:GO:0005351;;L-arabinose isomerase activity:GO:0008733;;carbohydrate transport:GO:0008643;;transporter activity:GO:0005215;;integral to membrane:GO:0016021;;transport:GO:0006810;;membrane:GO:0016020	01.05.25 regulation of C-compound and carbohydrate metabolism N.crassa	20.01.03 C-compound and carbohydrate transport	20.09.18 cellular import	20.09.18.07 non-vesicular cellular import	34.11.12 perception of nutrients and nutritional adaptation N.crassa	20.03 transport facilities
estExt_fgenesh2_kg.C_1_t10088	estExt_fgenesh2_kg.C_1_t10088	estExt_fgenesh2_kg.C_1_t10088	scaffold_1:621975-624907	123.759	357.06	1.52863	0.000419897	yes	121479	IPR003042:Aromatic-ring hydroxylase;;IPR013027:FAD-dependent pyridine nucleotide-disulphide oxidoreductase;;IPR012941:Phenol hydroxylase, C-terminal dimerisation;;IPR002938:Monooxygenase, FAD-binding;;IPR012336:Thioredoxin-like fold	sp|P15245|PH2M_TRICU Phenol 2-monooxygenase OS=Trichosporon cutaneum PE=1 SV=3:64.3142;;sp|P15245|PH2M_TRICU Phenol 2-monooxygenase OS=Trichosporon cutaneum PE=1 SV=3:219.164	1.14.13.7:Phenol 2-monooxygenase.	KOG3855:Monooxygenase involved in coenzyme Q (ubiquinone) biosynthesis	metabolic process:GO:0008152;;aromatic compound metabolic process:GO:0006725;;electron transport:GO:0006118;;oxidoreductase activity:GO:0016491;;monooxygenase activity:GO:0004497;;phenol 2-monooxygenase activity:GO:0018662	01.05.11.07.01 aerobic aromate catabolism	01.05.11.07.02 anaerobic aromate catabolism
fgenesh1_pg.30_#_89	fgenesh1_pg.30_#_89	fgenesh1_pg.30_#_89	scaffold_30:297888-300349	5.8846	16.6687	1.50213	0.00182147	yes
e_gw1.10.53.1	e_gw1.10.53.1	e_gw1.10.53.1	scaffold_10:993333-994596	27.7532	78.1343	1.4933	0.000421164	yes
estExt_fgenesh2_kg.C_300034	estExt_fgenesh2_kg.C_300034	estExt_fgenesh2_kg.C_300034	scaffold_30:236788-237601	793.67	2228.33	1.48935	0.00126535	yes	125146	IPR010636:Hydrophobin 2	sp|Q9UVI4|THYD_CLAFS Trihydrophobin OS=Claviceps fusiformis GN=TH1 PE=1 SV=1:67.0106;;sp|Q9UVI4|THYD_CLAFS Trihydrophobin OS=Claviceps fusiformis GN=TH1 PE=1 SV=1:74.3294;;sp|Q9UVI4|THYD_CLAFS Trihydrophobin OS=Claviceps fusiformis GN=TH1 PE=1 SV=1:78.5666	-	-	cell communication:GO:0007154;;cell wall:GO:0005618;;extracellular region:GO:0005576	34.11 cellular sensing and response to external stimulus N.crassa
estExt_Genewise1Plus.C_14_t10166	estExt_Genewise1Plus.C_14_t10166	estExt_Genewise1Plus.C_14_t10166	scaffold_14:203757-204672	40.7645	114.322	1.48771	0.000230762	yes	101041	-	-	-	KOG4157:beta-1,6-N-acetylglucosaminyltransferase, contains WSC domain	-
gm1.5176_g	gm1.5176_g	gm1.5176_g	scaffold_12:667246-668465	14.7485	41.2095	1.48241	0.00152536	yes	9620	IPR007822:Lanthionine synthetase C-like	sp|Q9Y0Y7|LANC3_DROME LanC-like protein 3 homolog OS=Drosophila melanogaster GN=CG2061 PE=1 SV=1:92.0485	-	KOG2787:Lanthionine synthetase C-like protein 1	-
estExt_Genewise1Plus.C_4_t20104	estExt_Genewise1Plus.C_4_t20104	estExt_Genewise1Plus.C_4_t20104	scaffold_4:754618-756711	53.6752	149.921	1.48188	7.46e-05	yes
e_gw1.4.1167.1	e_gw1.4.1167.1	e_gw1.4.1167.1	scaffold_4:506308-507211	28.2607	78.819	1.47975	0.000836409	yes	74283	IPR008547:Protein of unknown function DUF829, eukaryotic	-	-	-	-
estExt_fgenesh2_kg.C_510002	estExt_fgenesh2_kg.C_510002	estExt_fgenesh2_kg.C_510002	scaffold_51:1565-2185	257.668	717.942	1.47835	0.000102909	yes
e_gw1.8.444.1	e_gw1.8.444.1	e_gw1.8.444.1	scaffold_8:1069198-1070357	180.467	502.519	1.47744	0.000416794	yes	79175	IPR000791:GPR1/FUN34/yaaH	sp|Q24JP1|ALCS_ASPFU Protein alcS OS=Neosartorya fumigata (strain ATCC MYA-4609 / Af293 / CBS 101355 / FGSC A1100) GN=alcS PE=3 SV=1:214.542	-	-	membrane:GO:0016020
estExt_Genewise1.C_10_t10050	estExt_Genewise1.C_10_t10050	estExt_Genewise1.C_10_t10050	scaffold_10:50091-50737	54.7191	152.242	1.47625	0.00104887	yes
estExt_fgenesh2_kg.C_100085	estExt_fgenesh2_kg.C_100085	estExt_fgenesh2_kg.C_100085	scaffold_10:731313-732840	84.1577	234.029	1.47552	0.000228936	yes	123550	IPR004360:Glyoxalase/bleomycin resistance protein/dioxygenase;;IPR005956:4-hydroxyphenylpyruvate dioxygenase	sp|Q872T7|HPPD_NEUCR 4-hydroxyphenylpyruvate dioxygenase OS=Neurospora crassa GN=B23G1.170 PE=3 SV=1:688.337	1.13.11.27:4-hydroxyphenylpyruvate dioxygenase.	KOG0638:4-hydroxyphenylpyruvate dioxygenase	aromatic amino acid family metabolic process:GO:0009072;;4-hydroxyphenylpyruvate dioxygenase activity:GO:0003868	01.01.09 metabolism of the cysteine - aromatic group	01.01.09.01.01 biosynthesis of glycine	01.01.09.04 metabolism of phenylalanine	01.01.09.04.01 biosynthesis of phenylalanine	01.01.09.04.02 degradation of phenylalanine	01.01.09.05 metabolism of tyrosine	01.01.09.05.02 degradation of tyrosine	01.07 metabolism of vitamins, cofactors, and prosthetic groups	16.17 metal binding	16.17.09 heavy metal binding (Cu, Fe, Zn)
estExt_fgenesh1_pg.C_260010	estExt_fgenesh1_pg.C_260010	estExt_fgenesh1_pg.C_260010	scaffold_26:22559-24643	26.3687	72.9308	1.4677	0.000124648	yes	142825	IPR000209:Peptidase S8 and S53, subtilisin, kexin, sedolisin;;IPR009020:Proteinase inhibitor, propeptide;;IPR015366:Peptidase S53, propeptide	sp|Q70J59|SED2_ASPFU Tripeptidyl-peptidase sed2 OS=Neosartorya fumigata (strain ATCC MYA-4609 / Af293 / CBS 101355 / FGSC A1100) GN=sed2 PE=1 SV=1:408.297	3.4.14.9:Tripeptidyl-peptidase I.	-	serine-type peptidase activity:GO:0008236;;proteolysis:GO:0006508;;tripeptidyl-peptidase I activity:GO:0019131;;subtilase activity:GO:0004289	01.06 lipid, fatty acid and isoprenoid metabolism	14.07.11 protein processing (proteolytic)	14.13 protein/peptide degradation	14.13.04 lysosomal and vacuolar protein degradation	42.25 vacuole or lysosome	16.01 protein binding
e_gw1.3.843.1	e_gw1.3.843.1	e_gw1.3.843.1	scaffold_3:983495-985211	4.27794	11.8178	1.46597	0.00598091	yes	73547	IPR002110:Ankyrin	sp|Q12955|ANK3_HUMAN Ankyrin-3 OS=Homo sapiens GN=ANK3 PE=1 SV=3:84.3445;;sp|Q12955|ANK3_HUMAN Ankyrin-3 OS=Homo sapiens GN=ANK3 PE=1 SV=3:61.6178;;sp|Q12955|ANK3_HUMAN Ankyrin-3 OS=Homo sapiens GN=ANK3 PE=1 SV=3:85.8853;;sp|Q12955|ANK3_HUMAN Ankyrin-3 OS=Homo sapiens GN=ANK3 PE=1 SV=3:90.5077;;sp|Q12955|ANK3_HUMAN Ankyrin-3 OS=Homo sapiens GN=ANK3 PE=1 SV=3:62.003	2.4.2.30:NAD(+) ADP-ribosyltransferase.	KOG4177:Ankyrin	NAD+ ADP-ribosyltransferase activity:GO:0003950
e_gw1.47.56.1	e_gw1.47.56.1	e_gw1.47.56.1	scaffold_47:44729-45988	69.1577	190.959	1.4653	0.000138931	yes	93182	IPR008262:Lipase, active site	sp|Q5HZX7|CB043_RAT UPF0554 protein C2orf43 homolog OS=Rattus norvegicus PE=2 SV=1:63.929	-	KOG3975:Uncharacterized conserved protein	catalytic activity:GO:0003824
e_gw1.12.372.1	e_gw1.12.372.1	e_gw1.12.372.1	scaffold_12:630718-631874	32.4739	89.6654	1.46527	0.000595625	yes	82587	IPR006603:Cystinosin/ERS1p repeat	sp|P38279|RTC2_YEAST Protein RTC2 OS=Saccharomyces cerevisiae (strain ATCC 204508 / S288c) GN=RTC2 PE=1 SV=1:181.03	-	KOG2913:Predicted membrane protein	-
gm1.7448_g	gm1.7448_g	gm1.7448_g	scaffold_25:76844-78185	11.8603	32.7346	1.46468	0.00165184	yes	11892	IPR005338:Protein of unknown function UPF0075	sp|Q8RD30|ANMK_THETN Anhydro-N-acetylmuramic acid kinase OS=Thermoanaerobacter tengcongensis GN=anmK PE=3 SV=1:251.906	-	-	-
estExt_Genewise1Plus.C_3_t30131	estExt_Genewise1Plus.C_3_t30131	estExt_Genewise1Plus.C_3_t30131	scaffold_3:1386777-1388307	7.79883	21.4861	1.46207	0.00271838	yes	96560	IPR010730:Heterokaryon incompatibility	-	-	-	-
gm1.3925_g	gm1.3925_g	gm1.3925_g	scaffold_8:151035-151842	25.1075	68.7339	1.4529	0.00816085	yes	8369	IPR016543:Tetratricopeptide repeat 11 Fission 1 protein	sp|Q4IBU4|FIS1_GIBZE Mitochondria fission 1 protein OS=Gibberella zeae (strain PH-1 / FGSC 9075 / NRRL 31084) GN=FIS1 PE=3 SV=1:264.618	-	KOG3364:Membrane protein involved in organellar division	-	40.10.02.02.01 apoptotic mitochondrial changes	42.16 mitochondrion
estExt_Genewise1Plus.C_4_t30114	estExt_Genewise1Plus.C_4_t30114	estExt_Genewise1Plus.C_4_t30114	scaffold_4:1383977-1385160	150.468	409.156	1.4432	0.000520865	yes	97186	IPR006379:HAD-superfamily hydrolase, subfamily IIB;;IPR005002:Eukaryotic phosphomannomutase	sp|Q9UTJ2|PMM_SCHPO Phosphomannomutase OS=Schizosaccharomyces pombe (strain ATCC 38366 / 972) GN=pmm1 PE=2 SV=1:367.851	5.4.2.8:Phosphomannomutase.	KOG3189:Phosphomannomutase	cytoplasm:GO:0005737;;metabolic process:GO:0008152;;catalytic activity:GO:0003824;;mannose biosynthetic process:GO:0019307;;phosphomannomutase activity:GO:0004615	01.05 C-compound and carbohydrate metabolism	01.05.02 sugar, glucoside, polyol and carboxylate metabolism	01.05.02.01 nucleotide-sugar metabolism	01.05.02.04 sugar, glucoside, polyol and carboxylate anabolism S.cerevisiae	01.05.02.07 sugar, glucoside, polyol and carboxylate catabolism S.cerevisiae	14.04 protein targeting, sorting and translocation S.cerevisiae	14.07 protein modification	14.07.02.02 N-directed glycosylation, deglycosylation	20.01.10 protein transport
e_gw1.6.169.1	e_gw1.6.169.1	e_gw1.6.169.1	scaffold_6:954777-956581	20.3618	55.1938	1.43864	0.0006083	yes
estExt_Genewise1Plus.C_2_t30014	estExt_Genewise1Plus.C_2_t30014	estExt_Genewise1Plus.C_2_t30014	scaffold_2:1285639-1288913	47.9801	129.677	1.43442	0.000155648	yes	95552	IPR016181:Acyl-CoA N-acyltransferase;;IPR000182:GCN5-related N-acetyltransferase	sp|O59806|YJV8_SCHPO Uncharacterized N-acetyltransferase C550.08 OS=Schizosaccharomyces pombe (strain ATCC 38366 / 972) GN=SPCC550.08 PE=2 SV=1:162.155	-	-	metabolic process:GO:0008152;;N-acetyltransferase activity:GO:0008080
e_gw1.19.112.1	e_gw1.19.112.1	e_gw1.19.112.1	scaffold_19:539865-540791	13.9587	37.6743	1.43242	0.00511726	yes	86440	IPR001917:Aminotransferase, class-II, pyridoxal-phosphate binding site;;IPR015797:NUDIX;;IPR000086:NUDIX hydrolase, core	sp|Q9SZ63|NUD14_ARATH Nudix hydrolase 14, chloroplastic OS=Arabidopsis thaliana GN=NUDT14 PE=1 SV=2:142.124	-	KOG3041:Nucleoside diphosphate-sugar hydrolase of the MutT (NUDIX) family	metabolic process:GO:0008152;;transferase activity:GO:0016740;;hydrolase activity:GO:0016787
gm1.1076_g	gm1.1076_g	gm1.1076_g	scaffold_2:161099-162066	20.7073	55.5019	1.4224	0.00328995	yes	5520	IPR005301:Mob1/phocein	sp|Q9P601|MOB1_NEUCR Probable maintenance of ploidy protein mob1 OS=Neurospora crassa GN=B2O8.160 PE=3 SV=2:417.927	-	KOG0440:Cell cycle-associated protein Mob1-1	protein binding:GO:0005515	01.04 phosphate metabolism	10.03.01 mitotic cell cycle and cell cycle control N.crassa	11.02.03.04 transcriptional control	14.07.03 modification by phosphorylation, dephosphorylation, autophosphorylation	16.01 protein binding	16.17 metal binding	16.17.09 heavy metal binding (Cu, Fe, Zn)	18.02.01 enzymatic activity regulation / enzyme regulator S.cerevisiae	18.02.01.01.05 kinase activator
estExt_Genemark1.C_60029	estExt_Genemark1.C_60029	estExt_Genemark1.C_60029	scaffold_6:105768-107402	8.85171	23.7061	1.42123	0.00449479	yes	24454	IPR013057:Amino acid transporter, transmembrane	sp|P38680|MTR_NEUCR N amino acid transport system protein OS=Neurospora crassa GN=mtr PE=3 SV=2:540.806	-	KOG1303:Amino acid transporters	-	20.01.07 amino acid/amino acid derivatives transport N.crassa	34.11.12 perception of nutrients and nutritional adaptation N.crassa
gm1.8819_g	gm1.8819_g	gm1.8819_g	scaffold_48:36055-36442	61.1909	163.723	1.41987	0.00485569	yes	13263	IPR013055:Tachykinin/Neurokinin like, conserved site	-	-	-	-
e_gw1.5.301.1	e_gw1.5.301.1	e_gw1.5.301.1	scaffold_5:1287481-1289352	20.1451	53.6987	1.41446	0.00109051	yes	76109	IPR001012:UBX	sp|P34631|UBXN4_CAEEL UBX domain-containing protein 4 OS=Caenorhabditis elegans GN=ubxn-4 PE=2 SV=1:102.834	-	KOG2507:Ubiquitin regulatory protein UBXD2, contains UAS and UBX domains	-
gw1.25.201.1	gw1.25.201.1	gw1.25.201.1	scaffold_25:381018-382605	5.8796	15.6643	1.41369	0.00614417	yes	56216	-	-	-	KOG1029:Endocytic adaptor protein intersectin	-
e_gw1.9.807.1	e_gw1.9.807.1	e_gw1.9.807.1	scaffold_9:817176-818208	9.03477	23.936	1.40562	0.00886814	yes	80332	IPR001279:Beta-lactamase-like	sp|Q8VPD5|AHLLM_RHIRD N-acyl homoserine lactonase AttM OS=Rhizobium radiobacter GN=attM PE=1 SV=1:59.6918	-	-	hydrolase activity:GO:0016787
estExt_Genewise1Plus.C_7_t10493	estExt_Genewise1Plus.C_7_t10493	estExt_Genewise1Plus.C_7_t10493	scaffold_7:602725-604343	14.4407	38.1579	1.40184	0.00155627	yes
fgenesh2_kg.7_#_20_#_gi|18498033|gb|BM076851.1|BM076851	fgenesh2_kg.7_#_20_#_gi|18498033|gb|BM076851.1|BM076851	fgenesh2_kg.7_#_20_#_gi|18498033|gb|BM076851.1|BM076851	scaffold_7:94790-95385	79.2922	208.92	1.3977	0.0016981	yes
estExt_Genewise1Plus.C_3_t30098	estExt_Genewise1Plus.C_3_t30098	estExt_Genewise1Plus.C_3_t30098	scaffold_3:1339864-1341294	81.7086	211.639	1.37305	0.000205342	yes	96554	IPR004827:Basic-leucine zipper (bZIP) transcription factor;;IPR011616:bZIP transcription factor, bZIP-1	sp|P78962|ATF21_SCHPO Transcription factor atf21 OS=Schizosaccharomyces pombe (strain ATCC 38366 / 972) GN=atf21 PE=2 SV=1:57.3806	-	KOG1414:Transcriptional activator FOSB/c-Fos and related bZIP transcription factors	regulation of transcription, DNA-dependent:GO:0006355;;nucleus:GO:0005634;;transcription factor activity:GO:0003700;;protein dimerization activity:GO:0046983;;sequence-specific DNA binding:GO:0043565
e_gw1.17.218.1	e_gw1.17.218.1	e_gw1.17.218.1	scaffold_17:432430-433363	11.896	30.7227	1.36883	0.00839261	yes
fgenesh1_pg.7_#_6	fgenesh1_pg.7_#_6	fgenesh1_pg.7_#_6	scaffold_7:27358-28436	184.493	475.075	1.36459	0.000433251	yes	34838	IPR001993:Mitochondrial substrate carrier;;IPR002067:Mitochondrial carrier protein;;IPR002113:Adenine nucleotide translocator 1	sp|P0C582|M2OM_NEUCR Putative mitochondrial 2-oxoglutarate/malate carrier protein OS=Neurospora crassa GN=NCU10732 PE=3 SV=1:515.383	-	KOG0759:Mitochondrial oxoglutarate/malate carrier proteins	mitochondrial inner membrane:GO:0005743;;transporter activity:GO:0005215;;transport:GO:0006810;;binding:GO:0005488;;membrane:GO:0016020	20.01.01 ion transport	20.01.03 C-compound and carbohydrate transport	20.09.04 mitochondrial transport	16.13 C-compound binding	20.03 transport facilities
fgenesh1_pg.6_#_330	fgenesh1_pg.6_#_330	fgenesh1_pg.6_#_330	scaffold_6:1147508-1148639	44.5725	114.283	1.35839	0.000723182	yes	34755	IPR003495:Cobalamin (vitamin B12) biosynthesis CobW-like	sp|P24203|YJIA_ECOLI Uncharacterized GTP-binding protein YjiA OS=Escherichia coli (strain K12) GN=yjiA PE=1 SV=3:104.375	-	KOG2743:Cobalamin synthesis protein	-
e_gw1.23.209.1	e_gw1.23.209.1	e_gw1.23.209.1	scaffold_23:76297-77325	11.3832	29.1332	1.35576	0.00973408	yes
gm1.6293_g	gm1.6293_g	gm1.6293_g	scaffold_17:644299-644971	38.1835	97.3574	1.35034	0.00286568	yes	10737	-	-	-	KOG0672:Halotolerance protein HAL3 (contains flavoprotein domain)	-
e_gw1.1.2948.1	e_gw1.1.2948.1	e_gw1.1.2948.1	scaffold_1:758838-759486	171.936	438.337	1.35017	0.00081093	yes
fgenesh1_pg.31_#_24	fgenesh1_pg.31_#_24	fgenesh1_pg.31_#_24	scaffold_31:77514-79093	8.34792	21.2416	1.34741	0.00683951	yes	39240	IPR016161:Aldehyde/histidinol dehydrogenase;;IPR016160:Aldehyde dehydrogenase, conserved site;;IPR015590:Aldehyde dehydrogenase	sp|Q9URW9|YLX7_SCHPO Putative aldehyde dehydrogenase-like protein C922.07c OS=Schizosaccharomyces pombe (strain ATCC 38366 / 972) GN=SPAC922.07c PE=2 SV=1:305.064	1.2.1.3:Aldehyde dehydrogenase (NAD+).	KOG2450:Aldehyde dehydrogenase	metabolic process:GO:0008152;;aldehyde dehydrogenase (NAD) activity:GO:0004029;;oxidoreductase activity:GO:0016491	01.01 amino acid metabolism	01.01.03.02 metabolism of glutamate	01.01.03.02.02 degradation of glutamate	01.01.03.03.01 biosynthesis of proline	01.01.05.01.02 degradation of polyamines	01.01.09.04.01 biosynthesis of phenylalanine	01.01.09.05 metabolism of tyrosine	01.01.11 metabolism of the pyruvate family (alanine, isoleucine, leucine, valine) and D-alanine B.subtilis	01.02 nitrogen, sulfur and selenium metabolism B.subtilis	01.05 C-compound and carbohydrate metabolism	01.05.06.07 C-2 compound and organic acid catabolism S.cerevisiae	01.05.11.07.01 aerobic aromate catabolism	01.06 lipid, fatty acid and isoprenoid metabolism	01.06.06 isoprenoid metabolism	01.07 metabolism of vitamins, cofactors, and prosthetic groups N.crassa	01.07.01 biosynthesis of vitamins, cofactors, and prosthetic groups	01.20 secondary metabolism	01.20.05 metabolism of acetic acid derivatives	01.20.17.01 metabolism of nonprotein amino acids	01.20.29 metabolism of secondary products derived from L-glutamic acid, L-proline and L-ornithine	01.20.31 metabolism of secondary products derived from L-lysine, L-arginine and L-histidine	02.11 electron transport and membrane-associated energy conservation S.cerevisiae	02.13 respiration	02.16 fermentation	02.16.01 alcohol fermentation	02.45 energy conversion and regeneration	20.01.15 electron transport	32.01 stress response	32.01.01 oxidative stress response	32.01.03 osmotic and salt stress response	32.05.01 resistance proteins	32.05.03 defense related proteins	32.07.03 detoxification by modification	32.07.09 detoxification by degradation	42.16 mitochondrion
e_gw1.21.212.1	e_gw1.21.212.1	e_gw1.21.212.1	scaffold_21:44857-47663	6.27846	15.9281	1.34309	0.00384723	yes	87529	IPR006650:Adenosine/AMP deaminase active site;;IPR006329:AMP deaminase;;IPR001365:Adenosine/AMP deaminase	sp|P50998|AMPD_SCHPO AMP deaminase OS=Schizosaccharomyces pombe (strain ATCC 38366 / 972) GN=ada1 PE=1 SV=2:842.417	3.5.4.6:AMP deaminase.	KOG1096:Adenosine monophosphate deaminase	purine ribonucleoside monophosphate biosynthetic process:GO:0009168;;AMP deaminase activity:GO:0003876;;deaminase activity:GO:0019239	01.03.01 purin nucleotide/nucleoside/nucleobase metabolism N.crassa	01.04 phosphate metabolism	02.45 energy conversion and regeneration
estExt_Genewise1Plus.C_2_t40198	estExt_Genewise1Plus.C_2_t40198	estExt_Genewise1Plus.C_2_t40198	scaffold_2:2127444-2128769	34.0182	86.1234	1.3401	0.000917272	yes	95915	IPR001932:Protein phosphatase 2C-related	sp|Q9LVQ8|P2C80_ARATH Probable protein phosphatase 2C 80 OS=Arabidopsis thaliana GN=At5g66720 PE=2 SV=1:113.235	-	KOG1379:Serine/threonine protein phosphatase	catalytic activity:GO:0003824
gw1.17.351.1	gw1.17.351.1	gw1.17.351.1	scaffold_17:430402-431583	168.749	426.399	1.33732	0.00185435	yes	56580	IPR006769:Protein of unknown function DUF607	-	-	KOG2966:Uncharacterized conserved protein	-
estExt_fgenesh2_kg.C_100063	estExt_fgenesh2_kg.C_100063	estExt_fgenesh2_kg.C_100063	scaffold_10:629111-629697	86.6119	217.849	1.33069	0.00107267	yes
estExt_fgenesh1_pm.C_160183	estExt_fgenesh1_pm.C_160183	estExt_fgenesh1_pm.C_160183	scaffold_16:594802-596182	118.69	293.479	1.30606	0.000588508	yes	138245	IPR007599:Der1-like	sp|Q8VZU9|DERL1_ARATH Derlin-1 OS=Arabidopsis thaliana GN=DER1 PE=2 SV=1:70.8626	-	KOG0858:Predicted membrane protein	-
estExt_Genewise1.C_2_t20229	estExt_Genewise1.C_2_t20229	estExt_Genewise1.C_2_t20229	scaffold_2:871834-873889	178.483	440.682	1.30395	0.00404409	yes	107015	IPR015876:Fatty acid desaturase, type 1, core;;IPR009160:Delta-9 acyl-CoA desaturase with haem/steroid binding region;;IPR010257:Fatty acid desaturase, type 1, N-terminal;;IPR001199:Cytochrome b5;;IPR005804:Fatty acid desaturase, type 1;;IPR001522:Fatty acid desaturase, type 1, C-terminal	sp|Q12618|ACO1_AJECA Acyl-CoA desaturase OS=Ajellomyces capsulata GN=OLE1 PE=3 SV=1:766.918	-	KOG1600:Fatty acid desaturase	stearoyl-CoA 9-desaturase activity:GO:0004768;;transition metal ion binding:GO:0046914;;membrane:GO:0016020;;iron ion binding:GO:0005506;;oxidoreductase activity, acting on paired donors, with oxidation of a pair of donors resulting in the reduction of molecular oxygen to two molecules of water:GO:0016717;;endoplasmic reticulum:GO:0005783;;fatty acid biosynthetic process:GO:0006633;;lipid metabol…	01.06 lipid, fatty acid and isoprenoid metabolism N.crassa	01.06.05 fatty acid metabolism
estExt_Genemark1.C_1_t10393	estExt_Genemark1.C_1_t10393	estExt_Genemark1.C_1_t10393	scaffold_1:1490520-1491348	82.5562	203.443	1.30117	0.00206379	yes	23266	IPR011107:Protein phosphatase inhibitor	sp|Q2GNY7|YPI1_CHAGB Type 1 phosphatases regulator YPI1 OS=Chaetomium globosum GN=YPI1 PE=3 SV=1:127.102	-	KOG4102:Uncharacterized conserved protein	-
estExt_fgenesh1_pg.C_1_t20079	estExt_fgenesh1_pg.C_1_t20079	estExt_fgenesh1_pg.C_1_t20079	scaffold_1:2260612-2261790	23.2723	57.2475	1.2986	0.00390841	yes	139847	IPR004254:Hly-III related proteins	sp|Q09749|ADRL_SCHPO ADIPOR-like receptor spbc12c2.09c OS=Schizosaccharomyces pombe (strain ATCC 38366 / 972) GN=SPBC12C2.09c PE=2 SV=1:251.906	-	KOG0748:Predicted membrane proteins, contain hemolysin III domain	integral to membrane:GO:0016021	01.04 phosphate metabolism	01.04.04 regulation of phosphate metabolism	01.06 lipid, fatty acid and isoprenoid metabolism S.cerevisiae	01.06.10 regulation of lipid, fatty acid and isoprenoid metabolism N.crassa	02.25 oxidation of fatty acids	11.02.03.04.01 transcription activation	34.01.01.01 homeostasis of metal ions (Na, K, Ca etc.) S.cerevisiae	34.11.03 chemoperception and response	34.11.12 perception of nutrients and nutritional adaptation &nbsp;	16.01 protein binding	16.17 metal binding
fgenesh1_pg.1_#_696	fgenesh1_pg.1_#_696	fgenesh1_pg.1_#_696	scaffold_1:2693182-2694525	67.417	165.153	1.29262	0.00116335	yes	32207	IPR006026:Peptidase, metallopeptidases;;IPR006025:Peptidase M, neutral zinc metallopeptidases, zinc-binding site;;IPR001818:Peptidase M10A and M12B, matrixin and adamalysin	-	-	-	metallopeptidase activity:GO:0008237;;zinc ion binding:GO:0008270;;proteinaceous extracellular matrix:GO:0005578;;proteolysis:GO:0006508;;metalloendopeptidase activity:GO:0004222
estExt_fgenesh1_pm.C_70285	estExt_fgenesh1_pm.C_70285	estExt_fgenesh1_pm.C_70285	scaffold_7:970812-972631	11.5678	28.2823	1.28978	0.00451181	yes	137001	IPR005828:General substrate transporter;;IPR007114:Major facilitator superfamily;;IPR016196:MFS general substrate transporter	sp|P07921|LACP_KLULA Lactose permease OS=Kluyveromyces lactis (strain ATCC 8585 / CBS 2359 / DSM 70799 / NBRC 1267 / NRRL Y-1140 / WM37) GN=LAC12 PE=3 SV=1:180.644	5.3.1.4:L-arabinose isomerase.	KOG0254:Predicted transporter (major facilitator superfamily)	L-arabinose isomerase activity:GO:0008733;;transporter activity:GO:0005215;;integral to membrane:GO:0016021;;transport:GO:0006810	20.01.03 C-compound and carbohydrate transport	20.09.18 cellular import	20.09.18.07 non-vesicular cellular import	20.03 transport facilities
estExt_Genewise1Plus.C_4_t30257	estExt_Genewise1Plus.C_4_t30257	estExt_Genewise1Plus.C_4_t30257	scaffold_4:1569785-1571248	30.4737	74.2138	1.28412	0.00165302	yes	97249	IPR002492:Transposase, Tc1/Tc3;;IPR009057:Homeodomain-like	sp|P35072|TCB1_CAEBR Transposable element Tcb1 transposase OS=Caenorhabditis briggsae PE=3 SV=1:58.5362	-	-	nucleus:GO:0005634;;transposase activity:GO:0004803;;transposition, DNA-mediated:GO:0006313;;DNA integration:GO:0015074;;DNA binding:GO:0003677
estExt_fgenesh1_pm.C_100213	estExt_fgenesh1_pm.C_100213	estExt_fgenesh1_pm.C_100213	scaffold_10:733839-734715	112.627	274.193	1.28364	0.00133195	yes	137505	-	sp|A8E7I5|TTC36_DANRE Tetratricopeptide repeat protein 36 OS=Danio rerio GN=ttc36 PE=2 SV=1:53.1434	-	-	-
gw1.12.601.1	gw1.12.601.1	gw1.12.601.1	scaffold_12:696288-697440	20.3367	49.4274	1.28123	0.00538232	yes	64269	-	-	-	KOG2888:Putative RNA binding protein	-
estExt_fgenesh1_pg.C_2_t20130	estExt_fgenesh1_pg.C_2_t20130	estExt_fgenesh1_pg.C_2_t20130	scaffold_2:2434905-2436598	63.9661	155.232	1.27905	0.00128463	yes	140345	IPR012936:Protein of unknown function DUF1692	sp|Q09895|YAI8_SCHPO Uncharacterized protein C24B11.08c OS=Schizosaccharomyces pombe (strain ATCC 38366 / 972) GN=SPAC24B11.08c PE=2 SV=1:345.51	-	KOG2667:COPII vesicle protein	-	20.09.07.03 ER to Golgi transport	16.01 protein binding
estExt_Genewise1Plus.C_250006	estExt_Genewise1Plus.C_250006	estExt_Genewise1Plus.C_250006	scaffold_25:11707-13599	64.7671	156.91	1.2766	0.000808563	yes	103410	IPR001849:Pleckstrin-like	sp|O94447|YFED_SCHPO Uncharacterized PH domain-containing protein C637.13c OS=Schizosaccharomyces pombe (strain ATCC 38366 / 972) GN=SPAC637.13c PE=1 SV=1:176.022	-	-	-
estExt_fgenesh1_pg.C_90073	estExt_fgenesh1_pg.C_90073	estExt_fgenesh1_pg.C_90073	scaffold_9:261926-262866	131.436	317.046	1.27034	0.00191926	yes
estExt_Genewise1Plus.C_8_t20049	estExt_Genewise1Plus.C_8_t20049	estExt_Genewise1Plus.C_8_t20049	scaffold_8:749859-751508	84.9395	204.861	1.27014	0.00109663	yes	98998	IPR001993:Mitochondrial substrate carrier	sp|Q04013|YHM2_YEAST Mitochondrial DNA replication protein YHM2 OS=Saccharomyces cerevisiae (strain ATCC 204508 / S288c) GN=YHM2 PE=1 SV=1:456.447	-	KOG0756:Mitochondrial tricarboxylate/dicarboxylate carrier proteins	transport:GO:0006810;;binding:GO:0005488;;membrane:GO:0016020	10.01.03 DNA synthesis and replication	20.01.03 C-compound and carbohydrate transport	20.09.04 mitochondrial transport	42.16 mitochondrion
e_gw1.10.800.1	e_gw1.10.800.1	e_gw1.10.800.1	scaffold_10:709034-709691	48.4936	116.768	1.26778	0.00670946	yes	80647	IPR000804:Clathrin adaptor, sigma subunit/coatomer, zeta subunit;;IPR011012:Longin-like;;IPR016635:Adaptor protein complex, sigma subunit	sp|Q09905|AP3S_SCHPO AP-3 complex subunit sigma OS=Schizosaccharomyces pombe (strain ATCC 38366 / 972) GN=aps3 PE=2 SV=1:156.762	-	KOG0936:Clathrin adaptor complex, small subunit	intracellular protein transport:GO:0006886;;protein binding:GO:0005515;;protein complex assembly:GO:0006461;;transport:GO:0006810;;vesicle-mediated transport:GO:0016192;;membrane coat:GO:0030117	14.04 protein targeting, sorting and translocation	20.09.07 vesicular transport (Golgi network, etc.) N.crassa	20.09.07.06 post Golgi transport	20.09.18 cellular import	20.09.18.09.01 endocytosis
e_gw1.4.234.1	e_gw1.4.234.1	e_gw1.4.234.1	scaffold_4:1308642-1309284	39.9703	96.2282	1.26753	0.0062943	yes
estExt_Genemark1.C_1_t20301	estExt_Genemark1.C_1_t20301	estExt_Genemark1.C_1_t20301	scaffold_1:2930977-2932025	236.787	569.897	1.26711	0.00155108	yes	23456	IPR016482:Preprotein translocase Sec, Sec61-beta subunit, eukarya;;IPR005609:Preprotein translocase Sec, Sec61-beta subunit	sp|Q9HFC7|SC61B_YARLI Protein transport protein Sec61 subunit beta OS=Yarrowia lipolytica (strain CLIB 122 / E 150) GN=SBH1 PE=3 SV=1:119.013	-	KOG3457:Sec61 protein translocation complex, beta subunit	-	14.04 protein targeting, sorting and translocation N.crassa	20.01.10 protein transport	20.09.05 non-vesicular ER transport	20.03 transport facilities
estExt_Genewise1Plus.C_1_t60435	estExt_Genewise1Plus.C_1_t60435	estExt_Genewise1Plus.C_1_t60435	scaffold_1:3570857-3573106	110.934	266.845	1.2663	0.00296018	yes	95062	IPR005828:General substrate transporter;;IPR007114:Major facilitator superfamily;;IPR003663:Sugar transporter;;IPR016196:MFS general substrate transporter;;IPR005829:Sugar transporter, conserved site	sp|P53387|KHT2_KLULA Hexose transporter 2 OS=Kluyveromyces lactis (strain ATCC 8585 / CBS 2359 / DSM 70799 / NBRC 1267 / NRRL Y-1140 / WM37) GN=KHT2 PE=3 SV=1:435.647	5.3.1.4:L-arabinose isomerase.	KOG0254:Predicted transporter (major facilitator superfamily)	sugar:hydrogen symporter activity:GO:0005351;;L-arabinose isomerase activity:GO:0008733;;carbohydrate transport:GO:0008643;;transporter activity:GO:0005215;;integral to membrane:GO:0016021;;transport:GO:0006810;;membrane:GO:0016020	01.05 C-compound and carbohydrate metabolism	01.05.25 regulation of C-compound and carbohydrate metabolism N.crassa	20.01.03 C-compound and carbohydrate transport	20.01.03.01 sugar transport	20.01.13 lipid/fatty acid transport	20.09.16 cellular export and secretion	20.09.18 cellular import	20.09.18.07 non-vesicular cellular import	34.11.12 perception of nutrients and nutritional adaptation N.crassa	20.03 transport facilities
estExt_Genewise1Plus.C_6_t10338	estExt_Genewise1Plus.C_6_t10338	estExt_Genewise1Plus.C_6_t10338	scaffold_6:357584-359118	49.6397	119.145	1.26316	0.00125337	yes	97768	-	-	-	KOG2510:SWI-SNF chromatin-remodeling complex protein	-
estExt_Genewise1Plus.C_5_t10370	estExt_Genewise1Plus.C_5_t10370	estExt_Genewise1Plus.C_5_t10370	scaffold_5:456168-458522	57.8073	138.653	1.26215	0.00123898	yes	97355	IPR002110:Ankyrin	sp|Q99NH0|ANR17_MOUSE Ankyrin repeat domain-containing protein 17 OS=Mus musculus GN=Ankrd17 PE=1 SV=2:106.686;;sp|Q99NH0|ANR17_MOUSE Ankyrin repeat domain-containing protein 17 OS=Mus musculus GN=Ankrd17 PE=1 SV=2:140.969;;sp|Q99NH0|ANR17_MOUSE Ankyrin repeat domain-containing protein 17 OS=Mus musculus GN=Ankrd17 PE=1 SV=2:60.8474;;sp|Q99NH0|ANR17_MOUSE Ankyrin repeat domain-containing protein …	-	KOG4177:Ankyrin	-
fgenesh1_pg.38_#_14	fgenesh1_pg.38_#_14	fgenesh1_pg.38_#_14	scaffold_38:36243-37140	93.7053	223.247	1.25244	0.00205073	yes	39605	IPR016181:Acyl-CoA N-acyltransferase;;IPR000182:GCN5-related N-acetyltransferase	-	-	KOG0672:Halotolerance protein HAL3 (contains flavoprotein domain)	metabolic process:GO:0008152;;N-acetyltransferase activity:GO:0008080
estExt_Genemark1.C_110141	estExt_Genemark1.C_110141	estExt_Genemark1.C_110141	scaffold_11:502313-503909	39.7331	94.5567	1.25084	0.00142323	yes	25290	IPR006073:GTP1/OBG;;IPR002917:GTP-binding protein, HSR1-related;;IPR013646:GTPase of unknown function C-terminal	sp|O94362|YHOF_SCHPO Uncharacterized GTP-binding protein C428.15 OS=Schizosaccharomyces pombe (strain ATCC 38366 / 972) GN=SPBC428.15 PE=2 SV=1:538.11	-	KOG1491:Predicted GTP-binding protein (ODN superfamily)	GTP binding:GO:0005525;;intracellular:GO:0005622
gm1.8508_g	gm1.8508_g	gm1.8508_g	scaffold_38:34506-35430	209.308	495.719	1.2439	0.00146556	yes
fgenesh1_pm.5_#_202	fgenesh1_pm.5_#_202	fgenesh1_pm.5_#_202	scaffold_5:678890-679784	222.259	519.619	1.22522	0.00272591	yes
fgenesh1_pm.1_#_569	fgenesh1_pm.1_#_569	fgenesh1_pm.1_#_569	scaffold_1:1965673-1966255	59.5218	138.672	1.22018	0.00735402	yes
estExt_fgenesh1_pg.C_3_t10167	estExt_fgenesh1_pg.C_3_t10167	estExt_fgenesh1_pg.C_3_t10167	scaffold_3:604982-609552	20.0746	46.6242	1.21571	0.00131666	yes	140438	IPR004582:Checkpoint protein Rad24;;IPR003593:AAA+ ATPase, core	sp|Q6NXW6|RAD17_MOUSE Cell cycle checkpoint protein RAD17 OS=Mus musculus GN=Rad17 PE=1 SV=2:160.614	-	KOG1970:Checkpoint RAD17-RFC complex, RAD17/RAD24 component	DNA repair:GO:0006281;;nucleus:GO:0005634;;cell cycle:GO:0007049;;nucleoside-triphosphatase activity:GO:0017111;;nucleotide binding:GO:0000166	10.03.01.03 cell cycle checkpoints (checkpoints of morphogenesis, DNA-damage,-replication, mitotic phase and spindle) N.crassa
fgenesh1_pm.4_#_263	fgenesh1_pm.4_#_263	fgenesh1_pm.4_#_263	scaffold_4:887107-888837	14.9302	34.5291	1.20958	0.00819596	yes	128266	IPR001138:Fungal transcriptional regulatory protein, N-terminal	-	-	-	regulation of transcription, DNA-dependent:GO:0006355;;nucleus:GO:0005634;;zinc ion binding:GO:0008270;;transcription factor activity:GO:0003700
estExt_fgenesh1_pg.C_2_t10315	estExt_fgenesh1_pg.C_2_t10315	estExt_fgenesh1_pg.C_2_t10315	scaffold_2:1228653-1230439	12.8337	29.5695	1.20418	0.00872082	yes	140178	IPR011333:BTB/POZ fold;;IPR001487:Bromodomain;;IPR000210:BTB/POZ-like	sp|Q54BA2|Y3800_DICDI Ankyrin repeat, bromo and BTB domain-containing protein DDB_G0293800 OS=Dictyostelium discoideum GN=DDB_G0293800 PE=4 SV=1:92.8189	-	KOG1474:Transcription initiation factor TFIID, subunit BDF1 and related bromodomain proteins	protein binding:GO:0005515	14.07.03 modification by phosphorylation, dephosphorylation, autophosphorylation N.crassa	18.02.01.01 enzyme activator
fgenesh1_pm.1_#_195	fgenesh1_pm.1_#_195	fgenesh1_pm.1_#_195	scaffold_1:675015-676468	80.1516	184.452	1.20245	0.00362314	yes	125781	IPR006671:Cyclin, N-terminal;;IPR011028:Cyclin-like;;IPR006670:Cyclin	sp|O74627|CG1C_SCHPO Cyclin pch1 OS=Schizosaccharomyces pombe (strain ATCC 38366 / 972) GN=pch1 PE=1 SV=1:196.052	-	KOG0834:CDK9 kinase-activating protein cyclin T	-	10.03.01 mitotic cell cycle and cell cycle control N.crassa
gm1.8205_g	gm1.8205_g	gm1.8205_g	scaffold_32:68722-70402	41.1132	93.3781	1.18348	0.0023083	yes
e_gw1.1.2060.1	e_gw1.1.2060.1	e_gw1.1.2060.1	scaffold_1:2169658-2170315	74.899	169.957	1.18215	0.009013	yes	69745	IPR000223:Peptidase S26A, signal peptidase I;;IPR001733:Peptidase S26B, eukaryotic signal peptidase;;IPR011056:Peptidase S24, S26A and S26B, C-terminal;;IPR015927:Peptidase S24, S26A, S26B and S26C	sp|Q5RC30|SC11C_PONAB Signal peptidase complex catalytic subunit SEC11C OS=Pongo abelii GN=SEC11C PE=2 SV=3:174.866	3.4.21.89:Signal peptidase I.	KOG3342:Signal peptidase I	signal peptidase I activity:GO:0009004;;serine-type peptidase activity:GO:0008236;;peptidase activity:GO:0008233;;membrane:GO:0016020;;proteolysis:GO:0006508;;signal peptide processing:GO:0006465	14.07.11 protein processing (proteolytic)	16.01 protein binding
fgenesh1_pm.17_#_12	fgenesh1_pm.17_#_12	fgenesh1_pm.17_#_12	scaffold_17:58786-61365	16.4072	36.7193	1.16221	0.00612302	yes	132144	-	-	3.2.1.18:Exo-alpha-sialidase.	KOG1869:Splicing coactivator SRm160/300, subunit SRm300	exo-alpha-sialidase activity:GO:0004308
e_gw1.2.1106.1	e_gw1.2.1106.1	e_gw1.2.1106.1	scaffold_2:2507198-2508508	22.2864	49.8593	1.1617	0.00964322	yes	71346	IPR012904:8-oxoguanine DNA glycosylase, N-terminal;;IPR003265:HhH-GPD;;IPR012294:Transcription factor TFIID, C-terminal/DNA glycosylase, N-terminal;;IPR011257:DNA glycosylase	sp|O15527|OGG1_HUMAN N-glycosylase/DNA lyase OS=Homo sapiens GN=OGG1 PE=1 SV=2:245.743	-	KOG2875:8-oxoguanine DNA glycosylase	oxidized purine base lesion DNA N-glycosylase activity:GO:0008534;;nucleotide-excision repair:GO:0006289;;damaged DNA binding:GO:0003684;;DNA repair:GO:0006281;;base-excision repair:GO:0006284;;catalytic activity:GO:0003824;;DNA binding:GO:0003677	10.01.05.01 DNA repair	32.01.09 DNA damage response	16.03.01 DNA binding
e_gw1.3.656.1	e_gw1.3.656.1	e_gw1.3.656.1	scaffold_3:446170-446996	69.9677	156.005	1.15683	0.00724253	yes	73870	IPR005632:Outer membrane chaperone Skp (OmpH);;IPR007705:Vesicle transport v-SNARE	sp|P38736|GOS1_YEAST Protein transport protein GOS1 OS=Saccharomyces cerevisiae (strain ATCC 204508 / S288c) GN=GOS1 PE=1 SV=1:132.88	-	KOG3208:SNARE protein GS28	intracellular protein transport:GO:0006886;;protein binding:GO:0005515;;membrane:GO:0016020	14.04 protein targeting, sorting and translocation N.crassa	20.09.07 vesicular transport (Golgi network, etc.) N.crassa	20.09.07.05 intra Golgi transport	20.09.07.27 vesicle fusion
e_gw1.11.769.1	e_gw1.11.769.1	e_gw1.11.769.1	scaffold_11:965128-967181	113.784	252.191	1.14821	0.00514644	yes	81353	IPR000504:RNA recognition motif, RNP-1;;IPR007275:YT521-B-like protein	sp|Q5R746|YTDC2_PONAB YTH domain-containing protein 2 OS=Pongo abelii GN=YTHDC2 PE=2 SV=1:69.3218;;sp|Q5R746|YTDC2_PONAB YTH domain-containing protein 2 OS=Pongo abelii GN=YTHDC2 PE=2 SV=1:64.6994	-	KOG1902:Putative signal transduction protein involved in RNA splicing	nucleic acid binding:GO:0003676
estExt_Genewise1Plus.C_220173	estExt_Genewise1Plus.C_220173	estExt_Genewise1Plus.C_220173	scaffold_22:212908-214674	26.277	57.9851	1.14188	0.00958481	yes	103027	IPR001547:Glycoside hydrolase, family 5	sp|P28776|I23O1_MOUSE Indoleamine 2,3-dioxygenase 1 OS=Mus musculus GN=Ido1 PE=1 SV=1:89.7373	-	-	hydrolase activity, hydrolyzing O-glycosyl compounds:GO:0004553;;carbohydrate metabolic process:GO:0005975	01.01.09.06.02 degradation of tryptophan
gm1.3489_g	gm1.3489_g	gm1.3489_g	scaffold_7:39683-41603	30.2031	66.5576	1.13991	0.00541468	yes
estExt_Genemark1.C_320025	estExt_Genemark1.C_320025	estExt_Genemark1.C_320025	scaffold_32:83297-84337	49.0177	107.864	1.13784	0.00779046	yes
estExt_Genewise1Plus.C_210161	estExt_Genewise1Plus.C_210161	estExt_Genewise1Plus.C_210161	scaffold_21:190036-191029	58.469	127.755	1.12764	0.00824973	yes	102813	IPR010920:Like-Sm ribonucleoprotein-related, core;;IPR001163:Like-Sm ribonucleoprotein, core;;IPR006649:Like-Sm ribonucleoprotein, eukaryotic and archaea-type, core	sp|P87173|LSM1_SCHPO U6 snRNA-associated Sm-like protein LSm1 OS=Schizosaccharomyces pombe (strain ATCC 38366 / 972) GN=lsm1 PE=2 SV=1:106.301	-	KOG1782:Small Nuclear ribonucleoprotein splicing factor	mRNA metabolic process:GO:0016071;;ribonucleoprotein complex:GO:0030529	11.02.03 mRNA synthesis	11.04.03 mRNA processing (splicing, 5'-, 3'-end processing) N.crassa
estExt_fgenesh1_pg.C_80072	estExt_fgenesh1_pg.C_80072	estExt_fgenesh1_pg.C_80072	scaffold_8:274996-276344	27.2349	59.4634	1.12655	0.00980981	yes	141264	IPR001164:Arf GTPase activating protein	sp|P35197|GCS1_YEAST ADP-ribosylation factor GTPase-activating protein GCS1 OS=Saccharomyces cerevisiae (strain ATCC 204508 / S288c) GN=GCS1 PE=1 SV=1:246.514	-	KOG0704:ADP-ribosylation factor GTPase activator	ARF GTPase activator activity:GO:0008060;;zinc ion binding:GO:0008270;;regulation of ARF GTPase activity:GO:0032312	10.03.01 mitotic cell cycle and cell cycle control N.crassa	10.03.05.03 cell cycle dependent actin filament reorganization S.cerevisiae	20.09.07.03 ER to Golgi transport	20.09.16 cellular export and secretion	20.09.18 cellular import	42.04.03 actin cytoskeleton	16.01 protein binding	18.02.01.01.01 GTPase activator (GAP)
e_gw1.48.31.1	e_gw1.48.31.1	e_gw1.48.31.1	scaffold_48:33426-35562	24.5166	53.4747	1.1251	0.0062943	yes	93233	IPR001138:Fungal transcriptional regulatory protein, N-terminal	-	-	KOG1869:Splicing coactivator SRm160/300, subunit SRm300	regulation of transcription, DNA-dependent:GO:0006355;;nucleus:GO:0005634;;zinc ion binding:GO:0008270;;transcription factor activity:GO:0003700
e_gw1.38.59.1	e_gw1.38.59.1	e_gw1.38.59.1	scaffold_38:92448-93587	63.782	138.978	1.12363	0.00485915	yes	92240	IPR012269:Aquaporin;;IPR000425:Major intrinsic protein	sp|P43549|YFF4_YEAST Uncharacterized membrane protein YFL054C OS=Saccharomyces cerevisiae (strain ATCC 204508 / S288c) GN=YFL054C PE=1 SV=1:204.912	-	KOG0224:Aquaporin (major intrinsic protein family)	transporter activity:GO:0005215;;integral to membrane:GO:0016021;;transport:GO:0006810;;membrane:GO:0016020	20.01.03 C-compound and carbohydrate transport	20.01.11 amine / polyamine transport	20.09.18 cellular import	20.03 transport facilities	20.03.01 channel / pore class transport
estExt_Genemark1.C_190155	estExt_Genemark1.C_190155	estExt_Genemark1.C_190155	scaffold_19:541317-542521	56.706	123.528	1.12327	0.00536053	yes
estExt_Genewise1Plus.C_11_t20002	estExt_Genewise1Plus.C_11_t20002	estExt_Genewise1Plus.C_11_t20002	scaffold_11:629366-631644	17.6151	37.9125	1.10586	0.00888763	yes	100172	IPR002867:Zinc finger, C6HC-type	sp|Q6T486|RBRA_DICDI Probable E3 ubiquitin-protein ligase rbrA OS=Dictyostelium discoideum GN=rbrA PE=3 SV=1:57.7658	-	KOG1812:Predicted E3 ubiquitin ligase	zinc ion binding:GO:0008270
estExt_fgenesh2_kg.C_40131	estExt_fgenesh2_kg.C_40131	estExt_fgenesh2_kg.C_40131	scaffold_4:1210505-1211357	75.1218	160.805	1.09801	0.00844654	yes
estExt_Genewise1Plus.C_13_t10159	estExt_Genewise1Plus.C_13_t10159	estExt_Genewise1Plus.C_13_t10159	scaffold_13:189920-191112	51.8903	111.039	1.09753	0.00690545	yes	100700	IPR016817:Mannose-P-dolichol utilization defect 1 protein;;IPR006603:Cystinosin/ERS1p repeat	sp|Q9R0Q9|MPU1_MOUSE Mannose-P-dolichol utilization defect 1 protein OS=Mus musculus GN=Mpdu1 PE=2 SV=1:163.31	-	KOG3211:Predicted endoplasmic reticulum membrane protein Lec35/MPDU1 involved in monosaccharide-P-dolichol utilization	-
e_gw1.4.1135.1	e_gw1.4.1135.1	e_gw1.4.1135.1	scaffold_4:131898-134523	35.2541	74.2541	1.07468	0.00486683	yes	74305	IPR001764:Glycoside hydrolase, family 3, N-terminal;;IPR002772:Glycoside hydrolase, family 3, C-terminal;;IPR017853:Glycoside hydrolase, catalytic core	sp|A5ABF5|BGLM_ASPNC Probable beta-glucosidase M OS=Aspergillus niger (strain CBS 513.88 / FGSC A1513) GN=bglM PE=3 SV=1:780.4	3.2.1.21:Beta-glucosidase.	-	hydrolase activity, hydrolyzing O-glycosyl compounds:GO:0004553;;carbohydrate metabolic process:GO:0005975;;beta-glucosidase activity:GO:0008422	01.05.02.07 sugar, glucoside, polyol and carboxylate catabolism N.crassa	01.05.03 polysaccharide metabolism
gm1.6242_g	gm1.6242_g	gm1.6242_g	scaffold_17:427473-429160	28.086	59.0416	1.07188	0.00930972	yes	10686	IPR016181:Acyl-CoA N-acyltransferase	sp|Q9UUE3|YNZ6_SCHPO Putative lysine N-acyltransferase C17G9.06c OS=Schizosaccharomyces pombe (strain ATCC 38366 / 972) GN=SPBC17G9.06c PE=2 SV=1:127.487	-	KOG0672:Halotolerance protein HAL3 (contains flavoprotein domain)	-	01.05 C-compound and carbohydrate metabolism	01.20 secondary metabolism
estExt_Genemark1.C_380027	estExt_Genemark1.C_380027	estExt_Genemark1.C_380027	scaffold_38:71608-73839	65.2631	136.798	1.06771	0.0099525	yes	26906	IPR007114:Major facilitator superfamily;;IPR011701:Major facilitator superfamily MFS-1;;IPR016196:MFS general substrate transporter	sp|O59814|YCT4_SCHPO Uncharacterized transporter C794.04c OS=Schizosaccharomyces pombe (strain ATCC 38366 / 972) GN=SPCC794.04c PE=2 SV=1:184.496	-	KOG0255:Synaptic vesicle transporter SVOP and related transporters (major facilitator superfamily)	transporter activity:GO:0005215;;integral to membrane:GO:0016021;;transport:GO:0006810
e_gw1.14.329.1	e_gw1.14.329.1	e_gw1.14.329.1	scaffold_14:20975-22301	145.201	303.352	1.06295	0.00676363	yes	83637	IPR016040:NAD(P)-binding;;IPR002347:Glucose/ribitol dehydrogenase;;IPR002198:Short-chain dehydrogenase/reductase SDR	sp|P50167|ARDH_PICST D-arabinitol 2-dehydrogenase [ribulose-forming] OS=Scheffersomyces stipitis (strain ATCC 58785 / CBS 6054 / NBRC 10063 / NRRL Y-11545) GN=ARDH PE=2 SV=1:213.001	1.1.1.250:D-arabinitol 2-dehydrogenase.	KOG0725:Reductases with broad range of substrate specificities	metabolic process:GO:0008152;;catalytic activity:GO:0003824;;binding:GO:0005488;;oxidoreductase activity:GO:0016491;;D-arabinitol 2-dehydrogenase activity:GO:0047038	01.05 C-compound and carbohydrate metabolism
estExt_Genewise1Plus.C_1_t10431	estExt_Genewise1Plus.C_1_t10431	estExt_Genewise1Plus.C_1_t10431	scaffold_1:580453-582983	67.1105	140.009	1.06091	0.00962629	yes	93893	IPR016035:Acyl transferase/acyl hydrolase/lysophospholipase;;IPR002641:Patatin	sp|Q9Y7P3|YCKG_SCHPO Uncharacterized protein C1450.16c OS=Schizosaccharomyces pombe (strain ATCC 38366 / 972) GN=SPCC1450.16c PE=2 SV=1:310.071	-	KOG2214:Predicted esterase of the alpha-beta hydrolase superfamily	metabolic process:GO:0008152;;lipid metabolic process:GO:0006629
estExt_fgenesh1_pm.C_120044	estExt_fgenesh1_pm.C_120044	estExt_fgenesh1_pm.C_120044	scaffold_12:208828-212480	57.2716	29.1595	-0.973852	0.00979969	yes	137718	IPR001138:Fungal transcriptional regulatory protein, N-terminal	sp|P08638|LEUR_YEAST Regulatory protein LEU3 OS=Saccharomyces cerevisiae (strain ATCC 204508 / S288c) GN=LEU3 PE=1 SV=1:156.762	-	-	regulation of transcription, DNA-dependent:GO:0006355;;nucleus:GO:0005634;;zinc ion binding:GO:0008270;;transcription factor activity:GO:0003700	01.01.13 regulation of amino acid metabolism	11.02.03.04 transcriptional control
estExt_fgenesh1_pg.C_2_t20137	estExt_fgenesh1_pg.C_2_t20137	estExt_fgenesh1_pg.C_2_t20137	scaffold_2:2458697-2461647	68.7035	34.8993	-0.977184	0.00962541	yes	140348	IPR017442:Serine/threonine protein kinase-related;;IPR000719:Protein kinase, core;;IPR002290:Serine/threonine protein kinase;;IPR011009:Protein kinase-like;;IPR008271:Serine/threonine protein kinase, active site;;IPR017441:Protein kinase ATP binding, conserved site;;IPR001245:Tyrosine protein kinase	sp|O75011|NAK1_SCHPO Serine/threonine-protein kinase nak1 OS=Schizosaccharomyces pombe (strain ATCC 38366 / 972) GN=nak1 PE=1 SV=1:216.083	-	KOG0201:Serine/threonine protein kinase	casein kinase I activity:GO:0004681;;MP kinase activity:GO:0008339;;transmembrane receptor protein serine/threonine kinase activity:GO:0004675;;NF-kappaB-inducing kinase activity:GO:0004704;;JUN kinase activity:GO:0004705;;AMP-activated protein kinase activity:GO:0004679;;galactosyltransferase-associated kinase activity:GO:0004695;;MAP kinase kinase kinase kinase activity:GO:0008349;;ATP binding:…	14.07.03 modification by phosphorylation, dephosphorylation, autophosphorylation N.crassa	30.01 cellular signalling
estExt_fgenesh1_pm.C_360052	estExt_fgenesh1_pm.C_360052	estExt_fgenesh1_pm.C_360052	scaffold_36:161339-162852	86.995	43.7099	-0.992974	0.0097584	yes	139366	IPR006088:Sterol desaturase	sp|P38992|SUR2_YEAST Sphingolipid C4-hydroxylase SUR2 OS=Saccharomyces cerevisiae (strain ATCC 204508 / S288c) GN=SUR2 PE=1 SV=1:266.929	1.14.-.-:Acting on paired donors, with incorporation or reduction of	KOG0874:Sphingolipid hydroxylase	hydroxymethylsilanetriol oxidase activity:GO:0018598;;fluorene oxygenase activity:GO:0018585;;tert-butyl alcohol 2-monooxygenase activity:GO:0018594;;4-chlorophenoxyacetate monooxygenase activity:GO:0018593;;di-n-butyltin dioxygenase activity:GO:0018589;;mono-butyltin dioxygenase activity:GO:0018586;;metabolic process:GO:0008152;;catalytic activity:GO:0003824;;2-hydroxyisobutyrate 3-monooxygenase…	01.06 lipid, fatty acid and isoprenoid metabolism N.crassa
e_gw1.8.581.1	e_gw1.8.581.1	e_gw1.8.581.1	scaffold_8:48786-50461	116.123	58.296	-0.994184	0.00936665	yes	79497	-	-	-	KOG1187:Serine/threonine protein kinase	-
estExt_fgenesh1_pm.C_2_t10114	estExt_fgenesh1_pm.C_2_t10114	estExt_fgenesh1_pm.C_2_t10114	scaffold_2:371163-373514	52.8161	26.3892	-1.00103	0.00928235	yes	135784	IPR004621:Eukaryotic-type methylenetetrahydrofolate reductase;;IPR003171:Methylenetetrahydrofolate reductase	sp|Q10258|MTHR1_SCHPO Methylenetetrahydrofolate reductase 1 OS=Schizosaccharomyces pombe (strain ATCC 38366 / 972) GN=met9 PE=1 SV=1:619.387	1.5.1.20:Methylenetetrahydrofolate reductase (NADPH).	KOG0564:5,10-methylenetetrahydrofolate reductase	methionine metabolic process:GO:0006555;;methylenetetrahydrofolate reductase (NADPH) activity:GO:0004489	01.01 amino acid metabolism	01.01.06.05 metabolism of methionine	01.01.06.05.01 biosynthesis of methionine	01.02 nitrogen, sulfur and selenium metabolism N.crassa	01.05 C-compound and carbohydrate metabolism	01.05.13.03 tetrahydrofolate-dependent C-1-transfer N.crassa	01.07 metabolism of vitamins, cofactors, and prosthetic groups	01.07.01 biosynthesis of vitamins, cofactors, and prosthetic groups N.crassa	12.01.01 ribosomal proteins	34.11.13.07 circulation (e.g. blood pressure)	16.01 protein binding	16.21.07 NAD/NADP binding
estExt_Genewise1.C_210277	estExt_Genewise1.C_210277	estExt_Genewise1.C_210277	scaffold_21:342232-343403	359.306	179.17	-1.00388	0.00899213	yes	114486	IPR017447:CS;;IPR008978:HSP20-like chaperone;;IPR007052:CS domain	sp|Q11118|WOS2_SCHPO Protein wos2 OS=Schizosaccharomyces pombe (strain ATCC 38366 / 972) GN=wos2 PE=2 SV=1:128.642	-	KOG3158:HSP90 co-chaperone p23	-	14.01 protein folding and stabilization	32.01 stress response
estExt_Genemark1.C_120080	estExt_Genemark1.C_120080	estExt_Genemark1.C_120080	scaffold_12:338380-341216	39.5679	19.6665	-1.00859	0.00962541	yes	25397	IPR001917:Aminotransferase, class-II, pyridoxal-phosphate binding site;;IPR013724:Spa2 homology (SHD) of GIT	sp|P23201|SPA2_YEAST Protein SPA2 OS=Saccharomyces cerevisiae (strain ATCC 204508 / S288c) GN=SPA2 PE=1 SV=1:91.6633	-	KOG0161:Myosin class II heavy chain	metabolic process:GO:0008152;;transferase activity:GO:0016740	34.11.03.07 pheromone response, mating-type determination, sex-specific proteins N.crassa	40.01.03 directional cell growth (morphogenesis) N.crassa	43.01.03.05 budding, cell polarity and filament formation N.crassa
fgenesh1_pm.19_#_59	fgenesh1_pm.19_#_59	fgenesh1_pm.19_#_59	scaffold_19:184282-185289	210.775	104.439	-1.01305	0.00979969	yes	132597	IPR000243:Peptidase T1A, proteasome beta-subunit;;IPR016050:Proteasome, beta-type subunit, conserved site;;IPR001353:20S proteasome, A and B subunits	sp|P38624|PSB6_YEAST Proteasome component PRE3 OS=Saccharomyces cerevisiae (strain ATCC 204508 / S288c) GN=PRE3 PE=1 SV=2:305.449	3.4.25.1:Proteasome endopeptidase complex.	KOG0174:20S proteasome, regulatory subunit beta type PSMB6/PSMB9/PRE3	proteasome core complex:GO:0005839;;ubiquitin-dependent protein catabolic process:GO:0006511;;endopeptidase activity:GO:0004175;;threonine endopeptidase activity:GO:0004298;;proteasome endopeptidase activity:GO:0004299	14.07.11 protein processing (proteolytic)	14.13.01.01 proteasomal degradation (ubiquitin/proteasomal pathway) N.crassa	32.01 stress response	43.01.03.09 development of asco- basidio- or zygospore S.cerevisiae	16.01 protein binding
estExt_Genewise1Plus.C_10_t20066	estExt_Genewise1Plus.C_10_t20066	estExt_Genewise1Plus.C_10_t20066	scaffold_10:704218-707757	65.4788	32.3915	-1.01541	0.00768159	yes	99794	IPR001412:Aminoacyl-tRNA synthetase, class I, conserved site;;IPR004493:Leucyl-tRNA synthetase, class Ia, archaeal/eukaryotic cytosolic;;IPR013155:Valyl/Leucyl/Isoleucyl-tRNA synthetase, class I, anticodon-binding;;IPR009008:Valyl/Leucyl/Isoleucyl-tRNA synthetase, class Ia, editing;;IPR015413:Aminoacyl-tRNA synthetase, class I (M);;IPR009080:Aminoacyl-tRNA synthetase, class 1a, anticodon-binding	sp|P10857|SYLC_NEUCR Leucyl-tRNA synthetase, cytoplasmic OS=Neurospora crassa GN=leu-6 PE=3 SV=2:1653.65	6.1.1.4:Leucine--tRNA ligase.	KOG0437:Leucyl-tRNA synthetase	cytoplasm:GO:0005737;;tRNA aminoacylation for protein translation:GO:0006418;;translation:GO:0006412;;aminoacyl-tRNA ligase activity:GO:0004812;;leucyl-tRNA aminoacylation:GO:0006429;;nucleotide binding:GO:0000166;;ATP binding:GO:0005524;;leucine-tRNA ligase activity:GO:0004823	12.10 aminoacyl-tRNA-synthetases
fgenesh1_pm.29_#_62	fgenesh1_pm.29_#_62	fgenesh1_pm.29_#_62	scaffold_29:226971-230720	49.9466	24.6629	-1.01805	0.00770707	yes	134121	IPR007034:Protein of unknown function DUF663;;IPR012948:AARP2CN	sp|O94653|BMS1_SCHPO Ribosome biogenesis protein BMS1 homolog OS=Schizosaccharomyces pombe (strain ATCC 38366 / 972) GN=SPBC31E1.06 PE=1 SV=2:1035.02	-	KOG1951:GTP-binding protein AARP2 involved in 40S ribosome biogenesis	nucleus:GO:0005634;;ribosome biogenesis and assembly:GO:0042254	11.04.01 rRNA processing	12.01 ribosome biogenesis	16.19.05 GTP binding
estExt_Genewise1Plus.C_9_t10311	estExt_Genewise1Plus.C_9_t10311	estExt_Genewise1Plus.C_9_t10311	scaffold_9:384708-386932	199.798	98.4566	-1.02099	0.00888763	yes	99296	IPR016040:NAD(P)-binding;;IPR001282:Glucose-6-phosphate dehydrogenase	sp|P48826|G6PD_ASPNG Glucose-6-phosphate 1-dehydrogenase OS=Aspergillus niger GN=gsdA PE=2 SV=1:911.753	1.1.1.49:Glucose-6-phosphate 1-dehydrogenase.	KOG0563:Glucose-6-phosphate 1-dehydrogenase	metabolic process:GO:0008152;;catalytic activity:GO:0003824;;binding:GO:0005488;;glucose metabolic process:GO:0006006;;glucose-6-phosphate dehydrogenase activity:GO:0004345	01.01.03.01.01 biosynthesis of glutamine	01.05 C-compound and carbohydrate metabolism	01.05.02 sugar, glucoside, polyol and carboxylate metabolism	01.05.02.01 nucleotide-sugar metabolism	01.05.02.07 sugar, glucoside, polyol and carboxylate catabolism S.cerevisiae	01.07 metabolism of vitamins, cofactors, and prosthetic groups	01.20.37.01 metabolism of thioredoxin, glutaredoxin, glutathion	02.01 glycolysis and gluconeogenesis	02.07 pentose-phosphate pathway	02.07.01 pentose-phosphate pathway oxidative branch L.innocua	32.01 stress response	32.07 detoxification	16.21.07 NAD/NADP binding
estExt_Genewise1Plus.C_1_t30003	estExt_Genewise1Plus.C_1_t30003	estExt_Genewise1Plus.C_1_t30003	scaffold_1:1331709-1334636	56.975	28.0744	-1.02107	0.00617098	yes	94176	IPR000340:Protein-tyrosine phosphatase, dual specificity;;IPR000387:Protein-tyrosine phosphatase;;IPR010916:TonB box, conserved site;;IPR016130:Protein-tyrosine phosphatase, active site	sp|O13453|PMP1_SCHPO Tyrosine-protein phosphatase pmp1 OS=Schizosaccharomyces pombe (strain ATCC 38366 / 972) GN=pmp1 PE=2 SV=1:124.02	-	KOG1716:Dual specificity phosphatase	dephosphorylation:GO:0016311;;protein tyrosine/serine/threonine phosphatase activity:GO:0008138;;protein amino acid dephosphorylation:GO:0006470;;phosphoric monoester hydrolase activity:GO:0016791;;protein tyrosine phosphatase activity:GO:0004725	14.07.03 modification by phosphorylation, dephosphorylation, autophosphorylation N.crassa	30.01.05.01 protein kinase	34.01.03.05 homeostasis of chloride
gm1.3403_g	gm1.3403_g	gm1.3403_g	scaffold_6:1159580-1161204	146.633	72.1105	-1.02392	0.00621424	yes	7847	IPR009100:Acyl-CoA dehydrogenase/oxidase, middle and N-terminal;;IPR006091:Acyl-CoA dehydrogenase/oxidase, central region;;IPR009075:Acyl-CoA dehydrogenase/oxidase C-terminal;;IPR006090:Acyl-CoA oxidase/dehydrogenase, type 1	sp|Q5ZHT1|ACD11_CHICK Acyl-CoA dehydrogenase family member 11 OS=Gallus gallus GN=ACAD11 PE=2 SV=1:411.764	1.3.99.3:Acyl-CoA dehydrogenase.	KOG1469:Predicted acyl-CoA dehydrogenase	metabolic process:GO:0008152;;acyl-CoA dehydrogenase activity:GO:0003995;;electron transport:GO:0006118;;oxidoreductase activity, acting on the CH-CH group of donors:GO:0016627	01.04 phosphate metabolism	01.06 lipid, fatty acid and isoprenoid metabolism	01.06.05 fatty acid metabolism	02.25 oxidation of fatty acids	14.07.03 modification by phosphorylation, dephosphorylation, autophosphorylation	20.01.15 electron transport	16.21.05 FAD/FMN binding	18.01.01 regulation by modification	18.02 regulation of protein activity
estExt_fgenesh1_pm.C_280129	estExt_fgenesh1_pm.C_280129	estExt_fgenesh1_pm.C_280129	scaffold_28:414182-416880	52.2404	25.6604	-1.02562	0.00680199	yes	139115	IPR000917:Sulphatase;;IPR017850:Alkaline-phosphatase-like, core domain	-	-	KOG3867:Sulfatase	metabolic process:GO:0008152;;sulfuric ester hydrolase activity:GO:0008484
fgenesh1_pm.17_#_97	fgenesh1_pm.17_#_97	fgenesh1_pm.17_#_97	scaffold_17:345463-349056	29.6248	14.5502	-1.02576	0.00789818	yes	132229	IPR013951:Histone deacetylation protein Rxt3;;IPR004043:LCCL	-	-	KOG1878:Nuclear receptor coregulator SMRT/SMRTER, contains Myb-like domains	-
estExt_fgenesh1_pm.C_1_t10327	estExt_fgenesh1_pm.C_1_t10327	estExt_fgenesh1_pm.C_1_t10327	scaffold_1:1174268-1176705	42.1612	20.533	-1.03797	0.00978701	yes	135365	IPR017442:Serine/threonine protein kinase-related;;IPR000719:Protein kinase, core;;IPR002290:Serine/threonine protein kinase;;IPR011009:Protein kinase-like;;IPR008271:Serine/threonine protein kinase, active site;;IPR017441:Protein kinase ATP binding, conserved site;;IPR001245:Tyrosine protein kinase	sp|O88831|KKCC2_RAT Calcium/calmodulin-dependent protein kinase kinase 2 OS=Rattus norvegicus GN=Camkk2 PE=1 SV=1:265.388	-	KOG0585:Ca2+/calmodulin-dependent protein kinase kinase beta and related serine/threonine protein kinases	calmodulin-dependent protein kinase activity:GO:0004683;;protein-tyrosine kinase activity:GO:0004713;;ATP binding:GO:0005524;;protein kinase activity:GO:0004672;;protein serine/threonine kinase activity:GO:0004674;;protein amino acid phosphorylation:GO:0006468	10.03.03 cytokinesis (cell division) /septum formation and hydrolysis N.crassa	14.07.03 modification by phosphorylation, dephosphorylation, autophosphorylation N.crassa	30.01.05 enzyme mediated signal transduction
fgenesh1_pg.1_#_712	fgenesh1_pg.1_#_712	fgenesh1_pg.1_#_712	scaffold_1:2749110-2749704	500.872	243.783	-1.03885	0.00789818	yes
e_gw1.3.207.1	e_gw1.3.207.1	e_gw1.3.207.1	scaffold_3:1038680-1040435	123.963	60.2806	-1.04015	0.0055393	yes	73108	IPR007114:Major facilitator superfamily;;IPR011701:Major facilitator superfamily MFS-1;;IPR016196:MFS general substrate transporter	sp|Q9P6J0|YHDC_SCHPO Uncharacterized transporter C1683.12 OS=Schizosaccharomyces pombe (strain ATCC 38366 / 972) GN=SPBC1683.12 PE=2 SV=1:279.256	-	KOG2533:Permease of the major facilitator superfamily	transporter activity:GO:0005215;;integral to membrane:GO:0016021;;transport:GO:0006810	20.01.03 C-compound and carbohydrate transport	20.01.23 allantoin and allantoate transport	20.01.25 vitamine/cofactor transport	20.09.18 cellular import	20.09.18.07 non-vesicular cellular import	20.03 transport facilities
estExt_Genewise1Plus.C_270319	estExt_Genewise1Plus.C_270319	estExt_Genewise1Plus.C_270319	scaffold_27:349969-352452	58.681	28.5081	-1.04152	0.00575686	yes	103857	IPR017442:Serine/threonine protein kinase-related;;IPR000719:Protein kinase, core;;IPR002290:Serine/threonine protein kinase;;IPR011009:Protein kinase-like;;IPR008271:Serine/threonine protein kinase, active site;;IPR001245:Tyrosine protein kinase	sp|A1A5Q6|SMK_RAT Sperm motility kinase OS=Rattus norvegicus GN=Smok PE=2 SV=1:72.4034	-	KOG0197:Tyrosine kinases	casein kinase I activity:GO:0004681;;MP kinase activity:GO:0008339;;transmembrane receptor protein serine/threonine kinase activity:GO:0004675;;NF-kappaB-inducing kinase activity:GO:0004704;;JUN kinase activity:GO:0004705;;AMP-activated protein kinase activity:GO:0004679;;galactosyltransferase-associated kinase activity:GO:0004695;;MAP kinase kinase kinase kinase activity:GO:0008349;;ATP binding:…
estExt_Genewise1Plus.C_5_t20436	estExt_Genewise1Plus.C_5_t20436	estExt_Genewise1Plus.C_5_t20436	scaffold_5:1255874-1257173	314.807	152.335	-1.04722	0.00774326	yes	97596	IPR001452:Src homology-3	sp|Q06449|PIN3_YEAST [PSI+] inducibility protein 3 OS=Saccharomyces cerevisiae (strain ATCC 204508 / S288c) GN=PIN3 PE=1 SV=1:79.337	-	KOG3601:Adaptor protein GRB2, contains SH2 and SH3 domains	-	42.04.03 actin cytoskeleton
e_gw1.15.296.1	e_gw1.15.296.1	e_gw1.15.296.1	scaffold_15:201454-203967	139.319	67.4125	-1.0473	0.00744667	yes	84016	-	-	-	KOG1869:Splicing coactivator SRm160/300, subunit SRm300	-
e_gw1.10.496.1	e_gw1.10.496.1	e_gw1.10.496.1	scaffold_10:147976-150153	201.092	97.2948	-1.04742	0.00631443	yes	80933	IPR011563:Cyclic-AMP phosphodiesterase/lactamase;;IPR000396:Cyclic-AMP phosphodiesterase, class-II	sp|P36599|PDE1_SCHPO 3&apos;,5&apos;-cyclic-nucleotide phosphodiesterase OS=Schizosaccharomyces pombe (strain ATCC 38366 / 972) GN=cgs2 PE=2 SV=1:127.872	3.1.4.17:3',5'-cyclic-nucleotide phosphodiesterase.	-	regulation of cyclic-nucleotide phosphodiesterase activity:GO:0051342;;3',5'-cyclic-nucleotide phosphodiesterase activity:GO:0004114;;cAMP catabolic process:GO:0006198;;3',5'-cyclic-AMP phosphodiesterase activity:GO:0004115	01.03.13 regulation of nucleotide/nucleoside/nucleobase metabolism N.crassa
estExt_Genewise1Plus.C_4_t10218	estExt_Genewise1Plus.C_4_t10218	estExt_Genewise1Plus.C_4_t10218	scaffold_4:228887-230001	190.168	91.9167	-1.04887	0.00492605	yes	96780	IPR002935:O-methyltransferase, family 3	sp|Q00719|MDMC_STRMY O-methyltransferase mdmC OS=Streptomyces mycarofaciens GN=mdmC PE=3 SV=1:98.5969	2.1.1.-:Methyltransferases.	KOG1663:O-methyltransferase	monomethylamine methyltransferase activity:GO:0043852;;protein methyltransferase activity:GO:0008276;;site-specific DNA-methyltransferase (cytosine-specific) activity:GO:0008326;;hydroxyneurosporene-O-methyltransferase activity:GO:0043803;;rRNA (adenine) methyltransferase activity:GO:0016433;;protein-arginine N-methyltransferase activity:GO:0016274;;2-polyprenyl-6-methoxy-1,4-benzoquinone methylt…	42.01 cell wall
estExt_Genewise1Plus.C_12_t10264	estExt_Genewise1Plus.C_12_t10264	estExt_Genewise1Plus.C_12_t10264	scaffold_12:381268-382718	108.552	52.1579	-1.05743	0.00583628	yes	100447	IPR016040:NAD(P)-binding;;IPR001509:NAD-dependent epimerase/dehydratase	sp|Q12177|YL056_YEAST Uncharacterized protein YLL056C OS=Saccharomyces cerevisiae (strain ATCC 204508 / S288c) GN=YLL056C PE=2 SV=1:65.4698	-	KOG1502:Flavonol reductase/cinnamoyl-CoA reductase	metabolic process:GO:0008152;;coenzyme binding:GO:0050662;;cellular metabolic process:GO:0044237;;catalytic activity:GO:0003824;;binding:GO:0005488
estExt_Genemark1.C_100210	estExt_Genemark1.C_100210	estExt_Genemark1.C_100210	scaffold_10:743892-746040	205.38	98.6264	-1.05825	0.00920178	yes	25190	IPR002937:Amine oxidase	-	-	-	electron transport:GO:0006118;;oxidoreductase activity:GO:0016491
e_gw1.5.435.1	e_gw1.5.435.1	e_gw1.5.435.1	scaffold_5:875103-877388	77.3347	37.1197	-1.05893	0.00436068	yes	75242	IPR007087:Zinc finger, C2H2-type;;IPR015880:Zinc finger, C2H2-like	sp|Q2QGD7|ZXDC_HUMAN Zinc finger protein ZXDC OS=Homo sapiens GN=ZXDC PE=1 SV=2:55.4546;;sp|Q2QGD7|ZXDC_HUMAN Zinc finger protein ZXDC OS=Homo sapiens GN=ZXDC PE=1 SV=2:68.9366	-	KOG1721:FOG: Zn-finger	nucleic acid binding:GO:0003676;;zinc ion binding:GO:0008270;;intracellular:GO:0005622
estExt_Genewise1Plus.C_1_t60186	estExt_Genewise1Plus.C_1_t60186	estExt_Genewise1Plus.C_1_t60186	scaffold_1:3321392-3323398	112.089	53.7744	-1.05966	0.00536053	yes	94961	IPR001697:Pyruvate kinase;;IPR015793:Pyruvate kinase, barrel;;IPR015795:Pyruvate kinase, C-terminal-like;;IPR015813:Pyruvate/Phosphoenolpyruvate kinase, catalytic core;;IPR015794:Pyruvate kinase, alpha/beta;;IPR011037:Pyruvate kinase, beta-barrel-like	sp|P31865|KPYK_TRIRE Pyruvate kinase OS=Trichoderma reesei GN=pki1 PE=3 SV=1:1118.22	2.7.1.40:Pyruvate kinase.	KOG2323:Pyruvate kinase	pyruvate kinase activity:GO:0004743;;potassium ion binding:GO:0030955;;magnesium ion binding:GO:0000287;;catalytic activity:GO:0003824;;glycolysis:GO:0006096	01.03 nucleotide/nucleoside/nucleobase metabolism S.cerevisiae	01.04 phosphate metabolism	01.05 C-compound and carbohydrate metabolism	01.05.02.04 sugar, glucoside, polyol and carboxylate anabolism	01.05.02.07 sugar, glucoside, polyol and carboxylate catabolism S.cerevisiae	02.01 glycolysis and gluconeogenesis	02.01.03 regulation of glycolysis and gluconeogenesis	30.01.05 enzyme mediated signal transduction	16.17.07 magnesium binding	20.03.09 phosphotransferase system
estExt_Genewise1Plus.C_2_t40297	estExt_Genewise1Plus.C_2_t40297	estExt_Genewise1Plus.C_2_t40297	scaffold_2:2264639-2266729	115.724	55.4763	-1.06074	0.0057287	yes	95980	IPR008280:Tubulin/FtsZ, C-terminal;;IPR002452:Alpha tubulin;;IPR003008:Tubulin/FtsZ, GTPase;;IPR000217:Tubulin	sp|Q9C413|TBA_GLOLA Tubulin alpha chain OS=Glomerella lagenarium GN=TUB1 PE=3 SV=1:753.821	-	KOG1376:Alpha tubulin	protein complex:GO:0043234;;microtubule-based process:GO:0007017;;protein polymerization:GO:0051258;;GTPase activity:GO:0003924;;microtubule-based movement:GO:0007018;;microtubule:GO:0005874;;GTP binding:GO:0005525;;structural molecule activity:GO:0005198	01.03.01 purin nucleotide/nucleoside/nucleobase metabolism	01.04 phosphate metabolism	10.03.01 mitotic cell cycle and cell cycle control N.crassa	10.03.01.01.11 M phase	10.03.02 meiosis	10.03.04.05 chromosome segregation/division	10.03.04.09 nuclear migration	10.03.05.01 spindle pole body/centrosome and microtubule cycle N.crassa	14.10 assembly of protein complexes	20.09.14.01 tubulin dependent transport	30.01.09 second messenger mediated signal transduction	30.05.02.24 G-protein coupled receptor signalling pathway	32.05.01.07 electromagnetic waves resistance (e.g. UV)	34.05 cell motility	34.11.01 photoperception and response	41.01.01 mating (fertilization)	42.04 cytoskeleton/structural proteins	42.04.05 microtubule cytoskeleton	42.10 nucleus	16.01 protein binding	16.07 structural protein binding	16.19 nucleotide/nucleoside/nucleobase binding	16.19.05 GTP binding
e_gw1.26.377.1	e_gw1.26.377.1	e_gw1.26.377.1	scaffold_26:40964-42365	98.3824	47.1364	-1.06156	0.00601234	yes	89404	IPR004790:Isocitrate dehydrogenase NADP-dependent, eukaryotic;;IPR001804:Isocitrate/isopropylmalate dehydrogenase	sp|P79089|IDHP_ASPNG Isocitrate dehydrogenase [NADP], mitochondrial OS=Aspergillus niger GN=icdA PE=2 SV=1:707.212	1.1.1.42:Isocitrate dehydrogenase (NADP+).	KOG1526:NADP-dependent isocitrate dehydrogenase	oxidoreductase activity, acting on the CH-OH group of donors, NAD or NADP as acceptor:GO:0016616;;metabolic process:GO:0008152;;isocitrate dehydrogenase activity:GO:0004448;;isocitrate dehydrogenase (NADP+) activity:GO:0004450	01.01.03.02.01 biosynthesis of glutamate	01.05 C-compound and carbohydrate metabolism	01.05.02.04 sugar, glucoside, polyol and carboxylate anabolism	01.05.02.07 sugar, glucoside, polyol and carboxylate catabolism	01.06 lipid, fatty acid and isoprenoid metabolism	01.06.05 fatty acid metabolism	01.07 metabolism of vitamins, cofactors, and prosthetic groups S.cerevisiae	02.10 tricarboxylic-acid pathway (citrate cycle, Krebs cycle, TCA cycle) N.crassa	02.45 energy conversion and regeneration	20.01.15 electron transport	32.01.01 oxidative stress response	32.07.07.03 glutathione conjugation reaction	16.21.07 NAD/NADP binding
e_gw1.10.787.1	e_gw1.10.787.1	e_gw1.10.787.1	scaffold_10:82470-84471	65.7086	31.4191	-1.06444	0.00497526	yes	81057	IPR011046:WD40 repeat-like;;IPR001810:Cyclin-like F-box;;IPR001680:WD40 repeat	sp|Q01277|SCONB_NEUCR Probable E3 ubiquitin ligase complex SCF subunit scon-2 OS=Neurospora crassa GN=scon-2 PE=1 SV=1:799.275	-	KOG0274:Cdc4 and related F-box and WD-40 proteins	-	01.01.13 regulation of amino acid metabolism	01.02.07.03 regulation of sulphur metabolism	10.03.01 mitotic cell cycle and cell cycle control S.cerevisiae	11.02.03.04 transcriptional control	11.02.03.04.03 transcription repression	14.07.05 modification by ubiquitination, deubiquitination S.cerevisiae	14.13.01.01 proteasomal degradation (ubiquitin/proteasomal pathway) S.cerevisiae	16.01 protein binding
fgenesh1_pm.17_#_22	fgenesh1_pm.17_#_22	fgenesh1_pm.17_#_22	scaffold_17:87247-88973	52.2318	24.9405	-1.06644	0.00839261	yes	132154	IPR011046:WD40 repeat-like;;IPR012952:BING4, C-terminal;;IPR001680:WD40 repeat	sp|Q9P4X3|UTP7_SCHPO Probable U3 small nucleolar RNA-associated protein 7 OS=Schizosaccharomyces pombe (strain ATCC 38366 / 972) GN=utp7 PE=2 SV=1:540.806	-	KOG1272:WD40-repeat-containing subunit of the 18S rRNA processing complex	-	11.04.01 rRNA processing	16.03.03 RNA binding
estExt_fgenesh1_pm.C_1_t20323	estExt_fgenesh1_pm.C_1_t20323	estExt_fgenesh1_pm.C_1_t20323	scaffold_1:2828722-2829868	78.1651	37.2831	-1.068	0.00999053	yes	135607	IPR002737:Protein of unknown function DUF52	sp|Q6GNT9|MEMO1_XENLA Protein MEMO1 OS=Xenopus laevis GN=memo1 PE=2 SV=1:214.927	-	KOG3086:Predicted dioxygenase	-
estExt_Genewise1Plus.C_9_t10395	estExt_Genewise1Plus.C_9_t10395	estExt_Genewise1Plus.C_9_t10395	scaffold_9:517891-519880	213.756	101.924	-1.06848	0.0064868	yes	99336	IPR000679:Zinc finger, GATA-type	sp|Q54TE3|GTAJ_DICDI GATA zinc finger domain-containing protein 10 OS=Dictyostelium discoideum GN=gtaJ PE=4 SV=1:73.1738	-	KOG1187:Serine/threonine protein kinase	regulation of transcription, DNA-dependent:GO:0006355;;nucleus:GO:0005634;;zinc ion binding:GO:0008270;;transcription factor activity:GO:0003700;;sequence-specific DNA binding:GO:0043565
estExt_Genemark1.C_3_t10449	estExt_Genemark1.C_3_t10449	estExt_Genemark1.C_3_t10449	scaffold_3:1564525-1565772	95.3455	45.3789	-1.07114	0.00619033	yes	24088	IPR013886:PI31 proteasome regulator	-	-	KOG3544:Collagens (type IV and type XIII), and related proteins	-
fgenesh1_pg.1_#_157	fgenesh1_pg.1_#_157	fgenesh1_pg.1_#_157	scaffold_1:617054-618896	164.51	78.2804	-1.07145	0.00556469	yes	31668	IPR010061:Methylmalonate-semialdehyde dehydrogenase;;IPR016161:Aldehyde/histidinol dehydrogenase;;IPR016160:Aldehyde dehydrogenase, conserved site;;IPR015590:Aldehyde dehydrogenase	sp|Q9EQ20|MMSA_MOUSE Methylmalonate-semialdehyde dehydrogenase [acylating], mitochondrial OS=Mus musculus GN=Aldh6a1 PE=1 SV=1:634.795	1.2.1.27:Methylmalonate-semialdehyde dehydrogenase (acylating).	KOG2449:Methylmalonate semialdehyde dehydrogenase	metabolic process:GO:0008152;;methylmalonate-semialdehyde dehydrogenase (acylating) activity:GO:0004491;;oxidoreductase activity:GO:0016491;;valine metabolic process:GO:0006573	01.01 amino acid metabolism	01.01.11 metabolism of the pyruvate family (alanine, isoleucine, leucine, valine) and D-alanine B.subtilis	01.05 C-compound and carbohydrate metabolism	20.01.15 electron transport	16.21.07 NAD/NADP binding
fgenesh1_pg.3_#_116	fgenesh1_pg.3_#_116	fgenesh1_pg.3_#_116	scaffold_3:421866-423769	136.069	64.5997	-1.07474	0.00451181	yes	33238	IPR001199:Cytochrome b5;;IPR000262:FMN-dependent alpha-hydroxy acid dehydrogenase	sp|P09437|CYB2_HANAN Cytochrome b2, mitochondrial OS=Hansenula anomala GN=CYB2 PE=1 SV=2:312.768	1.1.2.3:L-lactate dehydrogenase (cytochrome).	KOG0538:Glycolate oxidase	electron transport:GO:0006118;;L-lactate dehydrogenase (cytochrome) activity:GO:0004460;;transition metal ion binding:GO:0046914;;heme binding:GO:0020037;;oxidoreductase activity:GO:0016491	01.05 C-compound and carbohydrate metabolism	02.11 electron transport and membrane-associated energy conservation S.cerevisiae	02.13 respiration	02.16.03 lactate fermentation	20.01.15 electron transport	42.16 mitochondrion
estExt_fgenesh1_pm.C_1_t20448	estExt_fgenesh1_pm.C_1_t20448	estExt_fgenesh1_pm.C_1_t20448	scaffold_1:3193850-3196336	133.316	63.2527	-1.07565	0.00916097	yes	135659	IPR016035:Acyl transferase/acyl hydrolase/lysophospholipase;;IPR002641:Patatin	sp|P36165|TGL4_YEAST Lipase 4 OS=Saccharomyces cerevisiae (strain ATCC 204508 / S288c) GN=TGL4 PE=1 SV=1:418.698	-	KOG2214:Predicted esterase of the alpha-beta hydrolase superfamily	metabolic process:GO:0008152;;lipid metabolic process:GO:0006629	01.06 lipid, fatty acid and isoprenoid metabolism S.cerevisiae
e_gw1.3.424.1	e_gw1.3.424.1	e_gw1.3.424.1	scaffold_3:962115-967168	15.9738	7.55909	-1.07943	0.00907842	yes	73176	IPR014808:DNA replication factor Dna2	sp|P38859|DNA2_YEAST DNA replication ATP-dependent helicase DNA2 OS=Saccharomyces cerevisiae (strain ATCC 204508 / S288c) GN=DNA2 PE=1 SV=1:584.334	-	KOG1805:DNA replication helicase	-	10.01.03 DNA synthesis and replication
estExt_fgenesh1_pm.C_110055	estExt_fgenesh1_pm.C_110055	estExt_fgenesh1_pm.C_110055	scaffold_11:190831-197067	34.6226	16.3654	-1.08106	0.00347838	yes	137572	IPR001030:Aconitase/3-isopropylmalate dehydratase large subunit, alpha/beta/alpha;;IPR006248:Aconitase, mitochondrial-like;;IPR015928:Aconitase/3-isopropylmalate dehydratase, swivel;;IPR000573:Aconitase A/isopropylmalate dehydratase small subunit, swivel	sp|Q9P7D4|ACON2_SCHPO Probable aconitate hydratase 2 OS=Schizosaccharomyces pombe (strain ATCC 38366 / 972) GN=SPBP4H10.15 PE=2 SV=2:954.896	4.2.1.3:Aconitate hydratase.	KOG0453:Aconitase/homoaconitase (aconitase superfamily)	metabolic process:GO:0008152;;4 iron, 4 sulfur cluster binding:GO:0051539;;tricarboxylic acid cycle:GO:0006099;;aconitate hydratase activity:GO:0003994
e_gw1.17.182.1	e_gw1.17.182.1	e_gw1.17.182.1	scaffold_17:422545-426960	40.6757	19.1795	-1.0846	0.00329739	yes	85265	IPR016188:PurM, N-terminal-like;;IPR016129:Peptidase C14, ICE, catalytic subunit p20, active site;;IPR010073:Phosphoribosylformylglycinamidine synthase, eukaryotes and proteobacteria;;IPR010918:AIR synthase related protein, C-terminal;;IPR000728:AIR synthase related protein	sp|P38972|PUR4_YEAST Phosphoribosylformylglycinamidine synthase OS=Saccharomyces cerevisiae (strain ATCC 204508 / S288c) GN=ADE6 PE=1 SV=2:1292.72	6.3.5.3:Phosphoribosylformylglycinamidine synthase.	KOG1907:Phosphoribosylformylglycinamidine synthase	phosphoribosylformylglycinamidine synthase activity:GO:0004642;;caspase activity:GO:0030693;;catalytic activity:GO:0003824;;proteolysis:GO:0006508;;'de novo' IMP biosynthetic process:GO:0006189	01.03.01.03 purine nucleotide/nucleoside/nucleobase anabolism S.cerevisiae
fgenesh1_pm.1_#_345	fgenesh1_pm.1_#_345	fgenesh1_pm.1_#_345	scaffold_1:1226726-1231278	19.8284	9.3151	-1.08992	0.00576313	yes	125931	IPR016024:Armadillo-type fold;;IPR000357:HEAT	sp|Q9HFF5|PDS5_SCHPO Sister chromatid cohesion protein pds5 OS=Schizosaccharomyces pombe (strain ATCC 38366 / 972) GN=pds5 PE=1 SV=1:465.307	-	KOG1525:Sister chromatid cohesion complex Cohesin, subunit PDS5	binding:GO:0005488	10.03.01.01 mitotic cell cycle	10.03.02 meiosis
e_gw1.10.341.1	e_gw1.10.341.1	e_gw1.10.341.1	scaffold_10:918361-919518	71.8783	33.6731	-1.09396	0.00973136	yes	80565	IPR006016:UspA	sp|O74782|YGBA_SCHPO Universal stress protein A family protein C25B2.10 OS=Schizosaccharomyces pombe (strain ATCC 38366 / 972) GN=SPBC25B2.10 PE=1 SV=1:160.614	-	-	response to stress:GO:0006950
estExt_fgenesh1_pm.C_3_t20025	estExt_fgenesh1_pm.C_3_t20025	estExt_fgenesh1_pm.C_3_t20025	scaffold_3:1705403-1708150	41.2889	19.335	-1.09454	0.00430529	yes	136321	IPR006650:Adenosine/AMP deaminase active site;;IPR006329:AMP deaminase;;IPR001365:Adenosine/AMP deaminase	sp|P50998|AMPD_SCHPO AMP deaminase OS=Schizosaccharomyces pombe (strain ATCC 38366 / 972) GN=ada1 PE=1 SV=2:830.091	3.5.4.6:AMP deaminase.	KOG1096:Adenosine monophosphate deaminase	purine ribonucleoside monophosphate biosynthetic process:GO:0009168;;AMP deaminase activity:GO:0003876;;deaminase activity:GO:0019239	01.03.01 purin nucleotide/nucleoside/nucleobase metabolism N.crassa	02.45 energy conversion and regeneration
estExt_fgenesh1_pm.C_160169	estExt_fgenesh1_pm.C_160169	estExt_fgenesh1_pm.C_160169	scaffold_16:550798-555295	21.3063	9.94689	-1.09897	0.00495225	yes	138235	IPR001119:S-layer homology region;;IPR003593:AAA+ ATPase, core;;IPR011527:ABC transporter, transmembrane region, type 1;;IPR001140:ABC transporter, transmembrane region;;IPR003439:ABC transporter-like	sp|P53049|YOR1_YEAST Oligomycin resistance ATP-dependent permease YOR1 OS=Saccharomyces cerevisiae (strain ATCC 204508 / S288c) GN=YOR1 PE=1 SV=1:868.996	-	KOG0054:Multidrug resistance-associated protein/mitoxantrone resistance protein, ABC superfamily	nucleoside-triphosphatase activity:GO:0017111;;ATP binding:GO:0005524;;integral to membrane:GO:0016021;;ATPase activity:GO:0016887;;transport:GO:0006810;;nucleotide binding:GO:0000166;;ATPase activity, coupled to transmembrane movement of substances:GO:0042626	01.04 phosphate metabolism	20.01.01.07.08 organic anion transport	20.01.03 C-compound and carbohydrate transport	20.01.27 drug/toxin transport	20.09.13 vacuolar/lysosomal transport	32.05.01.03 chemical agent resistance	32.07.05 detoxification by export	34.11.03 chemoperception and response	16.01 protein binding	16.19 nucleotide/nucleoside/nucleobase binding	16.19.03 ATP binding	20.03 transport facilities	20.03.22 transport ATPases	20.03.25 ABC transporters
fgenesh1_pm.22_#_120	fgenesh1_pm.22_#_120	fgenesh1_pm.22_#_120	scaffold_22:401029-402541	87.843	40.9784	-1.10006	0.00356288	yes	133200	IPR006710:Glycoside hydrolase, family 43	sp|Q45071|XYND_BACSU Arabinoxylan arabinofuranohydrolase OS=Bacillus subtilis GN=xynD PE=1 SV=2:91.6633	-	-	hydrolase activity, hydrolyzing O-glycosyl compounds:GO:0004553;;carbohydrate metabolic process:GO:0005975
e_gw1.1.658.1	e_gw1.1.658.1	e_gw1.1.658.1	scaffold_1:602080-603330	515.221	240.18	-1.10108	0.00486683	yes	69022	IPR008162:Inorganic pyrophosphatase	sp|Q6MVH7|IPYR_NEUCR Inorganic pyrophosphatase OS=Neurospora crassa GN=ipp-1 PE=3 SV=1:517.694	3.6.1.1:Inorganic pyrophosphatase.	KOG1626:Inorganic pyrophosphatase/Nucleosome remodeling factor, subunit NURF38	phosphate metabolic process:GO:0006796;;cytoplasm:GO:0005737;;magnesium ion binding:GO:0000287;;inorganic diphosphatase activity:GO:0004427
estExt_Genewise1Plus.C_1_t50047	estExt_Genewise1Plus.C_1_t50047	estExt_Genewise1Plus.C_1_t50047	scaffold_1:2586136-2587784	76.9864	35.8837	-1.10128	0.00438597	yes	94665	IPR011051:Cupin, RmlC-type;;IPR017774:Bicupin, oxalate decarboxylase/oxidase;;IPR006045:Cupin 1	sp|O34714|OXDC_BACSU Oxalate decarboxylase oxdC OS=Bacillus subtilis GN=oxdC PE=1 SV=1:437.187	-	-	nutrient reservoir activity:GO:0045735	01.05 C-compound and carbohydrate metabolism	01.05.02.07 sugar, glucoside, polyol and carboxylate catabolism B.subtilis	01.05.06.07 C-2 compound and organic acid catabolism B.subtilis	02.13 respiration	02.45 energy conversion and regeneration	32.05 disease, virulence and defense
estExt_fgenesh2_kg.C_180071	estExt_fgenesh2_kg.C_180071	estExt_fgenesh2_kg.C_180071	scaffold_18:516788-518139	169.184	78.673	-1.10465	0.00979969	yes	124396	IPR005828:General substrate transporter;;IPR007114:Major facilitator superfamily;;IPR003663:Sugar transporter;;IPR016196:MFS general substrate transporter;;IPR005829:Sugar transporter, conserved site	sp|P49374|HGT1_KLULA High-affinity glucose transporter OS=Kluyveromyces lactis (strain ATCC 8585 / CBS 2359 / DSM 70799 / NBRC 1267 / NRRL Y-1140 / WM37) GN=HGT1 PE=3 SV=1:341.658	5.3.1.4:L-arabinose isomerase.	KOG0254:Predicted transporter (major facilitator superfamily)	sugar:hydrogen symporter activity:GO:0005351;;L-arabinose isomerase activity:GO:0008733;;carbohydrate transport:GO:0008643;;transporter activity:GO:0005215;;integral to membrane:GO:0016021;;transport:GO:0006810;;membrane:GO:0016020	20.01.03 C-compound and carbohydrate transport	20.09.18.07 non-vesicular cellular import
estExt_fgenesh1_pm.C_130181	estExt_fgenesh1_pm.C_130181	estExt_fgenesh1_pm.C_130181	scaffold_13:633759-635726	71.0919	32.9047	-1.11139	0.00427731	yes	137900	IPR001046:Natural resistance-associated macrophage protein	sp|P38925|SMF1_YEAST Manganese transporter SMF1 OS=Saccharomyces cerevisiae (strain ATCC 204508 / S288c) GN=SMF1 PE=1 SV=2:506.908	-	KOG1291:Mn2+ and Fe2+ transporters of the NRAMP family	transporter activity:GO:0005215;;transport:GO:0006810;;membrane:GO:0016020	10.03.01 mitotic cell cycle and cell cycle control N.crassa	14.04 protein targeting, sorting and translocation S.cerevisiae	20.01.01.01.01 heavy metal ion transport (Cu+, Fe3+, etc.) N.crassa	20.09.04 mitochondrial transport	20.09.18 cellular import	20.09.18.07 non-vesicular cellular import	34.01.01.01 homeostasis of metal ions (Na, K, Ca etc.) N.crassa
e_gw1.2.1869.1	e_gw1.2.1869.1	e_gw1.2.1869.1	scaffold_2:1017219-1020822	22.2717	10.2969	-1.113	0.00569376	yes	70929	-	-	-	KOG2992:Nucleolar GTPase/ATPase p130	-
e_gw1.10.796.1	e_gw1.10.796.1	e_gw1.10.796.1	scaffold_10:181584-183591	53.4108	24.6639	-1.11473	0.0042167	yes	80563	-	sp|Q1LX49|LCHN_DANRE Protein LCHN OS=Danio rerio GN=lchn PE=3 SV=1:108.227	-	KOG4704:Uncharacterized conserved protein	-
fgenesh1_pm.7_#_121	fgenesh1_pm.7_#_121	fgenesh1_pm.7_#_121	scaffold_7:403771-406508	73.9761	34.1594	-1.11478	0.00245772	yes
estExt_Genewise1.C_3_t20036	estExt_Genewise1.C_3_t20036	estExt_Genewise1.C_3_t20036	scaffold_3:640922-645599	72.8278	33.6005	-1.11601	0.00435312	yes	107939	IPR002860:BNR repeat;;IPR000253:Forkhead-associated;;IPR006581:VPS10	sp|C7YGZ0|VPS10_NECH7 Vacuolar protein sorting/targeting protein 10 OS=Nectria haematococca (strain 77-13-4 / FGSC 9596 / MPVI) GN=VPS10 PE=3 SV=1:2010.73	-	KOG3511:Sortilin and related receptors	integral to membrane:GO:0016021	14.04 protein targeting, sorting and translocation N.crassa	20.09.07 vesicular transport (Golgi network, etc.) N.crassa	20.09.13 vacuolar/lysosomal transport
estExt_Genewise1Plus.C_270143	estExt_Genewise1Plus.C_270143	estExt_Genewise1Plus.C_270143	scaffold_27:168574-170302	189.011	87.1536	-1.11684	0.00332679	yes	103773	IPR015424:Pyridoxal phosphate-dependent transferase, major region;;IPR000192:Aminotransferase, class V/Cysteine desulphurase	sp|O94431|YHKC_SCHPO Uncharacterized aminotransferase C660.12c OS=Schizosaccharomyces pombe (strain ATCC 38366 / 972) GN=SPBC660.12c PE=2 SV=1:199.519	-	KOG1549:Cysteine desulfurase NFS1	metabolic process:GO:0008152	01.20 secondary metabolism
estExt_fgenesh1_pg.C_1_t10430	estExt_fgenesh1_pg.C_1_t10430	estExt_fgenesh1_pg.C_1_t10430	scaffold_1:1725001-1728259	130.609	60.1451	-1.11874	0.00479897	yes	139792	IPR013346:Ribonucleoside-diphosphate reductase, alpha subunit;;IPR005144:ATP-cone;;IPR013509:Ribonucleotide reductase large subunit, N-terminal;;IPR008926:Ribonucleotide reductase R1 subunit, N-terminal;;IPR000788:Ribonucleotide reductase large subunit, C-terminal	sp|Q9UW15|RIR1_NEUCR Ribonucleoside-diphosphate reductase large chain OS=Neurospora crassa GN=rnr-1 PE=1 SV=2:1493.79	1.17.4.1:Ribonucleoside-diphosphate reductase.	KOG1112:Ribonucleotide reductase, alpha subunit	DNA replication:GO:0006260;;protein binding:GO:0005515;;ribonucleoside-diphosphate reductase activity:GO:0004748;;ribonucleoside-diphosphate reductase complex:GO:0005971	01.03.07 deoxyribonucleotide metabolism	10.01.03 DNA synthesis and replication	10.01.05.01 DNA repair	16.01 protein binding	16.19 nucleotide/nucleoside/nucleobase binding	16.19.03 ATP binding
estExt_Genewise1Plus.C_1_t30045	estExt_Genewise1Plus.C_1_t30045	estExt_Genewise1Plus.C_1_t30045	scaffold_1:1378495-1380426	116.586	53.6441	-1.11991	0.00310191	yes	94212	IPR007114:Major facilitator superfamily;;IPR011701:Major facilitator superfamily MFS-1;;IPR016196:MFS general substrate transporter	sp|O74829|YN2F_SCHPO Uncharacterized MFS-type transporter C530.15c OS=Schizosaccharomyces pombe (strain ATCC 38366 / 972) GN=SPBC530.15c PE=1 SV=2:320.472	-	KOG0255:Synaptic vesicle transporter SVOP and related transporters (major facilitator superfamily)	transporter activity:GO:0005215;;integral to membrane:GO:0016021;;transport:GO:0006810	20.01.27 drug/toxin transport	32.05.01 resistance proteins	32.07.05 detoxification by export	20.03 transport facilities	20.03.02.03.01 proton driven antiporter
e_gw1.1.1103.1	e_gw1.1.1103.1	e_gw1.1.1103.1	scaffold_1:1157191-1158604	119.937	55.1633	-1.12049	0.00258004	yes	70036	-	-	2.3.1.48:Histone acetyltransferase.	KOG1778:CREB binding protein/P300 and related TAZ Zn-finger proteins	histone acetyltransferase activity:GO:0004402
estExt_fgenesh1_pg.C_110202	estExt_fgenesh1_pg.C_110202	estExt_fgenesh1_pg.C_110202	scaffold_11:773465-774623	175.092	80.5169	-1.12075	0.00255851	yes	141729	IPR009071:High mobility group box, HMG;;IPR000910:High mobility group box, HMG1/HMG2	sp|P40630|TFAM_MOUSE Transcription factor A, mitochondrial OS=Mus musculus GN=Tfam PE=1 SV=2:55.0694	-	KOG4012:Histone H1	regulation of transcription, DNA-dependent:GO:0006355;;DNA binding:GO:0003677
e_gw1.44.9.1	e_gw1.44.9.1	e_gw1.44.9.1	scaffold_44:85853-91911	29.7367	13.6695	-1.12128	0.00221823	yes	92930	IPR000209:Peptidase S8 and S53, subtilisin, kexin, sedolisin;;IPR001849:Pleckstrin-like	sp|Q00083|APSA_EMENI Anucleate primary sterigmata protein A OS=Emericella nidulans GN=apsA PE=1 SV=2:406.757;;sp|Q00083|APSA_EMENI Anucleate primary sterigmata protein A OS=Emericella nidulans GN=apsA PE=1 SV=2:396.356	-	KOG0391:SNF2 family DNA-dependent ATPase	proteolysis:GO:0006508;;subtilase activity:GO:0004289	10.03.04.09 nuclear migration
fgenesh1_pm.11_#_275	fgenesh1_pm.11_#_275	fgenesh1_pm.11_#_275	scaffold_11:938969-941980	141.519	64.8752	-1.12526	0.00432662	yes	130942	-	-	-	KOG2806:Chitinase	-
estExt_Genewise1Plus.C_3_t10471	estExt_Genewise1Plus.C_3_t10471	estExt_Genewise1Plus.C_3_t10471	scaffold_3:543248-545211	92.7578	42.4756	-1.12684	0.00225998	yes	96303	-	-	-	KOG1187:Serine/threonine protein kinase	-
estExt_Genewise1Plus.C_5_t20207	estExt_Genewise1Plus.C_5_t20207	estExt_Genewise1Plus.C_5_t20207	scaffold_5:870923-873032	137.238	62.6256	-1.13186	0.00378892	yes	97499	IPR001023:Heat shock protein Hsp70;;IPR013126:Heat shock protein 70	sp|P38788|SSZ1_YEAST Ribosome-associated complex subunit SSZ1 OS=Saccharomyces cerevisiae (strain ATCC 204508 / S288c) GN=SSZ1 PE=1 SV=2:458.759	-	KOG0101:Molecular chaperones HSP70/HSC70, HSP70 superfamily	ATP binding:GO:0005524	32.01.07 unfolded protein response (e.g. ER quality control) S.cerevisiae	16.01 protein binding
estExt_Genewise1Plus.C_2_t40099	estExt_Genewise1Plus.C_2_t40099	estExt_Genewise1Plus.C_2_t40099	scaffold_2:2021660-2023941	348.083	158.737	-1.13279	0.00785526	yes	95874	IPR008280:Tubulin/FtsZ, C-terminal;;IPR002452:Alpha tubulin;;IPR003008:Tubulin/FtsZ, GTPase;;IPR000217:Tubulin	sp|Q5I2J3|TBA_GIBZE Tubulin alpha chain OS=Gibberella zeae (strain PH-1 / FGSC 9075 / NRRL 31084) GN=TUB1 PE=3 SV=2:890.567	-	KOG1376:Alpha tubulin	protein complex:GO:0043234;;microtubule-based process:GO:0007017;;protein polymerization:GO:0051258;;GTPase activity:GO:0003924;;microtubule-based movement:GO:0007018;;microtubule:GO:0005874;;GTP binding:GO:0005525;;structural molecule activity:GO:0005198	01.03.01 purin nucleotide/nucleoside/nucleobase metabolism	01.04 phosphate metabolism	10.03.01 mitotic cell cycle and cell cycle control N.crassa	10.03.01.01.11 M phase	10.03.02 meiosis	10.03.04.05 chromosome segregation/division	10.03.04.09 nuclear migration	10.03.05.01 spindle pole body/centrosome and microtubule cycle N.crassa	14.10 assembly of protein complexes	20.09.14.01 tubulin dependent transport	30.01.09 second messenger mediated signal transduction	30.05.02.24 G-protein coupled receptor signalling pathway	32.05.01.07 electromagnetic waves resistance (e.g. UV)	34.05 cell motility	34.11.01 photoperception and response	41.01.01 mating (fertilization)	42.04 cytoskeleton/structural proteins	42.04.05 microtubule cytoskeleton	42.10 nucleus	16.01 protein binding	16.07 structural protein binding	16.19 nucleotide/nucleoside/nucleobase binding	16.19.05 GTP binding
e_gw1.2.240.1	e_gw1.2.240.1	e_gw1.2.240.1	scaffold_2:695151-701237	11.5341	5.25522	-1.13408	0.00589779	yes	70471	IPR014021:Helicase, superfamily 1 and 2, ATP-binding;;IPR003593:AAA+ ATPase, core;;IPR014001:DEAD-like helicase, N-terminal;;IPR011545:DNA/RNA helicase, DEAD/DEAH box type, N-terminal;;IPR004179:Sec63;;IPR001650:DNA/RNA helicase, C-terminal	sp|O60072|MUG81_SCHPO Putative helicase mug81 OS=Schizosaccharomyces pombe (strain ATCC 38366 / 972) GN=mug81 PE=1 SV=1:1991.08	3.6.1.-:In phosphorous-containing anhydrides.	KOG0952:DNA/RNA helicase MER3/SLH1, DEAD-box superfamily	nucleoside-triphosphatase activity:GO:0017111;;thiamin-pyrophosphatase activity:GO:0004787;;helicase activity:GO:0004386;;diacylglycerol pyrophosphate phosphatase activity:GO:0000810;;pyrophosphatase activity:GO:0016462;;dihydroneopterin triphosphate pyrophosphohydrolase activity:GO:0019177;;nucleotide binding:GO:0000166;;UDP-2,3-diacylglucosamine hydrolase activity:GO:0008758;;nucleic acid bindi…	10.01.02 DNA topology	10.01.05.01 DNA repair	10.01.05.03 DNA recombination	11.02 RNA synthesis	11.02.03 mRNA synthesis	11.04 RNA processing	11.04.01 rRNA processing	11.04.03.01 splicing	12.01 ribosome biogenesis	12.07 translational control	32.07 detoxification	16.19 nucleotide/nucleoside/nucleobase binding	16.19.03 ATP binding
e_gw1.1.2634.1	e_gw1.1.2634.1	e_gw1.1.2634.1	scaffold_1:3183563-3184983	270.393	123.072	-1.13555	0.00355223	yes	69061	IPR000782:Beta-Ig-H3/fasciclin	sp|Q8CFM6|STAB2_RAT Stabilin-2 (Fragment) OS=Rattus norvegicus GN=Stab2 PE=1 SV=1:64.6994	-	KOG1218:Proteins containing Ca2+-binding EGF-like domains	-
estExt_Genewise1Plus.C_16_t10357	estExt_Genewise1Plus.C_16_t10357	estExt_Genewise1Plus.C_16_t10357	scaffold_16:436196-438515	30.5824	13.8753	-1.14019	0.00671649	yes
e_gw1.1.2010.1	e_gw1.1.2010.1	e_gw1.1.2010.1	scaffold_1:1247005-1249926	31.5691	14.311	-1.14139	0.00394713	yes	67399	IPR000504:RNA recognition motif, RNP-1;;IPR016024:Armadillo-type fold;;IPR001313:Pumilio RNA-binding region	sp|O60059|YG58_SCHPO Pumilio domain-containing protein C56F2.08c OS=Schizosaccharomyces pombe (strain ATCC 38366 / 972) GN=SPBC56F2.08c PE=1 SV=1:404.06	-	KOG4574:RNA-binding protein (contains RRM and Pumilio-like repeats)	RNA binding:GO:0003723;;nucleic acid binding:GO:0003676;;binding:GO:0005488	11.04.03.11 control of mRNA stability	16.03.03 RNA binding
fgenesh1_pm.11_#_70	fgenesh1_pm.11_#_70	fgenesh1_pm.11_#_70	scaffold_11:225642-227733	137.673	62.3864	-1.14194	0.00215509	yes	130737	IPR016024:Armadillo-type fold;;IPR012777:Leukotriene A-4 hydrolase/aminopeptidase;;IPR006025:Peptidase M, neutral zinc metallopeptidases, zinc-binding site;;IPR015211:Peptidase M1, leukotriene A4 hydrolase, aminopeptidase C-terminal;;IPR014782:Peptidase M1, membrane alanine aminopeptidase, N-terminal	sp|Q7S785|LKHA4_NEUCR Leukotriene A-4 hydrolase OS=Neurospora crassa GN=NCU06732 PE=3 SV=1:885.174	3.3.2.6:Leukotriene-A4 hydrolase.	KOG1047:Bifunctional leukotriene A4 hydrolase/aminopeptidase LTA4H	metallopeptidase activity:GO:0008237;;zinc ion binding:GO:0008270;;leukotriene biosynthetic process:GO:0019370;;leukotriene-A4 hydrolase activity:GO:0004463;;binding:GO:0005488;;proteolysis:GO:0006508	01.05 C-compound and carbohydrate metabolism	01.06 lipid, fatty acid and isoprenoid metabolism N.crassa	01.20 secondary metabolism	01.20.05.09 metabolism of eicosanoids	14.07.11 protein processing (proteolytic)	14.13 protein/peptide degradation	16.17 metal binding	16.17.09 heavy metal binding (Cu, Fe, Zn)
gm1.6570_g	gm1.6570_g	gm1.6570_g	scaffold_19:240128-242963	65.9717	29.8499	-1.14412	0.001872	yes	11014	IPR002345:Lipocalin;;IPR002469:Peptidase S9B, dipeptidylpeptidase IV N-terminal;;IPR001375:Peptidase S9, prolyl oligopeptidase active site region	sp|P18962|DAP2_YEAST Dipeptidyl aminopeptidase B OS=Saccharomyces cerevisiae (strain ATCC 204508 / S288c) GN=DAP2 PE=1 SV=2:578.17	3.4.14.-:Dipeptidyl-peptidases and tripeptidyl-peptidases.	KOG2100:Dipeptidyl aminopeptidase	dipeptidyl-peptidase IV activity:GO:0004274;;transporter activity:GO:0005215;;serine-type peptidase activity:GO:0008236;;tripeptidyl-peptidase activity:GO:0008240;;transport:GO:0006810;;binding:GO:0005488;;membrane:GO:0016020;;proteolysis:GO:0006508	14.07.11 protein processing (proteolytic)	14.13.04 lysosomal and vacuolar protein degradation S.cerevisiae
estExt_Genewise1Plus.C_6_t20451	estExt_Genewise1Plus.C_6_t20451	estExt_Genewise1Plus.C_6_t20451	scaffold_6:1058100-1059994	64.6521	29.2061	-1.14643	0.00269959	yes	98018	IPR015424:Pyridoxal phosphate-dependent transferase, major region;;IPR003248:Phosphoserine aminotransferase;;IPR000192:Aminotransferase, class V/Cysteine desulphurase	sp|P33330|SERC_YEAST Phosphoserine aminotransferase OS=Saccharomyces cerevisiae (strain ATCC 204508 / S288c) GN=SER1 PE=1 SV=1:317.005	2.6.1.52:Phosphoserine aminotransferase.	KOG2790:Phosphoserine aminotransferase	L-serine biosynthetic process:GO:0006564;;metabolic process:GO:0008152;;phosphoserine transaminase activity:GO:0004648	01.01 amino acid metabolism	01.01.09.01.01 biosynthesis of glycine	01.01.09.02.01 biosynthesis of serine	01.02.02 nitrogen metabolism	01.03.01.03 purine nucleotide/nucleoside/nucleobase anabolism S.cerevisiae	01.07.01 biosynthesis of vitamins, cofactors, and prosthetic groups S.cerevisiae	02.19 metabolism of energy reserves (e.g. glycogen, trehalose) B.subtilis
fgenesh2_kg.22_#_76_#_gi|38125968|gb|CF871286.1|CF871286	fgenesh2_kg.22_#_76_#_gi|38125968|gb|CF871286.1|CF871286	fgenesh2_kg.22_#_76_#_gi|38125968|gb|CF871286.1|CF871286	scaffold_22:388143-388692	374.856	169.06	-1.1488	0.00201938	yes	120407	IPR009009:Barwin-related endoglucanase	sp|O42799|ALL7_ASPFU Allergen Asp f 7 OS=Neosartorya fumigata (strain ATCC MYA-4609 / Af293 / CBS 101355 / FGSC A1100) GN=AFUA_4G06670 PE=1 SV=2:53.9138	-	-	-
estExt_fgenesh1_pg.C_50110	estExt_fgenesh1_pg.C_50110	estExt_fgenesh1_pg.C_50110	scaffold_5:385288-387779	44.0201	19.8498	-1.14904	0.00258456	yes	140763	IPR007087:Zinc finger, C2H2-type;;IPR015880:Zinc finger, C2H2-like	-	-	KOG1721:FOG: Zn-finger	nucleic acid binding:GO:0003676;;zinc ion binding:GO:0008270;;intracellular:GO:0005622
e_gw1.5.274.1	e_gw1.5.274.1	e_gw1.5.274.1	scaffold_5:736998-739351	34.8242	15.6983	-1.14949	0.00538232	yes	75497	IPR007219:Fungal specific transcription factor	sp|P87000|ACU15_NEUCR Transcriptional activator protein acu-15 OS=Neurospora crassa GN=acu-15 PE=1 SV=2:70.4774	-	-	nucleus:GO:0005634;;zinc ion binding:GO:0008270;;transcription:GO:0006350;;DNA binding:GO:0003677
fgenesh1_pg.9_#_137	fgenesh1_pg.9_#_137	fgenesh1_pg.9_#_137	scaffold_9:568818-570595	164.645	73.9174	-1.15538	0.0016981	yes	35616	IPR008280:Tubulin/FtsZ, C-terminal;;IPR013838:Beta tubulin, autoregulation binding site;;IPR003008:Tubulin/FtsZ, GTPase;;IPR002453:Beta tubulin;;IPR000217:Tubulin	sp|Q875L3|TBB1_HYPVI Tubulin beta-1 chain OS=Hypocrea virens PE=2 SV=1:924.08	-	KOG1375:Beta tubulin	protein complex:GO:0043234;;microtubule-based process:GO:0007017;;protein polymerization:GO:0051258;;GTPase activity:GO:0003924;;microtubule-based movement:GO:0007018;;microtubule:GO:0005874;;GTP binding:GO:0005525;;structural molecule activity:GO:0005198	01.03.01 purin nucleotide/nucleoside/nucleobase metabolism	01.04 phosphate metabolism	10.03.01 mitotic cell cycle and cell cycle control N.crassa	10.03.01.01.11 M phase	10.03.02 meiosis	10.03.04.05 chromosome segregation/division	10.03.04.09 nuclear migration	10.03.05.01 spindle pole body/centrosome and microtubule cycle N.crassa	14.10 assembly of protein complexes	20.09.14.01 tubulin dependent transport	30.01.09 second messenger mediated signal transduction	30.05.02.24 G-protein coupled receptor signalling pathway	32.05.01.07 electromagnetic waves resistance (e.g. UV)	34.05 cell motility	34.11.01 photoperception and response	41.01.01 mating (fertilization)	42.04 cytoskeleton/structural proteins	42.04.05 microtubule cytoskeleton	42.05 centrosome	42.10 nucleus	16.01 protein binding	16.07 structural protein binding	16.19 nucleotide/nucleoside/nucleobase binding	16.19.05 GTP binding
estExt_fgenesh2_kg.C_130051	estExt_fgenesh2_kg.C_130051	estExt_fgenesh2_kg.C_130051	scaffold_13:446320-446730	280.617	125.707	-1.15854	0.00886345	yes
e_gw1.3.87.1	e_gw1.3.87.1	e_gw1.3.87.1	scaffold_3:1516473-1518374	199.284	89.2608	-1.15873	0.00322726	yes	72395	IPR008521:Protein of unknown function DUF803	sp|Q3SWX0|NIPA2_BOVIN Magnesium transporter NIPA2 OS=Bos taurus GN=NIPA2 PE=2 SV=1:258.07	-	KOG2922:Uncharacterized conserved protein	-
estExt_Genewise1Plus.C_1_t50302	estExt_Genewise1Plus.C_1_t50302	estExt_Genewise1Plus.C_1_t50302	scaffold_1:2933580-2935110	53.7915	24.082	-1.15942	0.00570795	yes	94802	IPR011948:Dullard-like phosphatase domain;;IPR004274:NLI interacting factor	sp|Q07949|PSR2_YEAST Probable phosphatase PSR2 OS=Saccharomyces cerevisiae (strain ATCC 204508 / S288c) GN=PSR2 PE=1 SV=1:291.582	3.1.3.16:Serine/threonine specific protein phosphatase.	KOG1605:TFIIF-interacting CTD phosphatase, including NLI-interacting factor (involved in RNA polymerase II regulation)	myosin phosphatase complex:GO:0017023;;myosin phosphatase regulator activity:GO:0017020;;phosphoric monoester hydrolase activity:GO:0016791;;phosphoprotein phosphatase activity:GO:0004721;;calcium-dependent protein serine/threonine phosphatase activity:GO:0004723;;CTD phosphatase activity:GO:0008420;;calcium-dependent protein serine/threonine phosphatase regulator activity:GO:0008597;;magnesium-d…	14.07.03 modification by phosphorylation, dephosphorylation, autophosphorylation N.crassa	32.01.03 osmotic and salt stress response
gm1.7978_g	gm1.7978_g	gm1.7978_g	scaffold_29:318087-321159	52.5692	23.4967	-1.16176	0.00195024	yes	12422	IPR007114:Major facilitator superfamily;;IPR011701:Major facilitator superfamily MFS-1;;IPR016196:MFS general substrate transporter	sp|O94343|YHMA_SCHPO Uncharacterized MFS-type transporter C1271.10c OS=Schizosaccharomyces pombe (strain ATCC 38366 / 972) GN=SPBC1271.10c PE=1 SV=1:114.39;;sp|O94343|YHMA_SCHPO Uncharacterized MFS-type transporter C1271.10c OS=Schizosaccharomyces pombe (strain ATCC 38366 / 972) GN=SPBC1271.10c PE=1 SV=1:88.9669	-	KOG0255:Synaptic vesicle transporter SVOP and related transporters (major facilitator superfamily)	transporter activity:GO:0005215;;integral to membrane:GO:0016021;;transport:GO:0006810	20.01.27 drug/toxin transport	20.03 transport facilities
estExt_Genewise1.C_470014	estExt_Genewise1.C_470014	estExt_Genewise1.C_470014	scaffold_47:19382-22068	258.396	115.477	-1.16198	0.00711339	yes	116820	IPR016035:Acyl transferase/acyl hydrolase/lysophospholipase;;IPR002642:Lysophospholipase, catalytic region	sp|P0C957|PLB1_ASPFU Lysophospholipase 1 OS=Neosartorya fumigata (strain ATCC MYA-4609 / Af293 / CBS 101355 / FGSC A1100) GN=plb1 PE=2 SV=1:660.218	3.1.1.5:Lysophospholipase.	KOG1325:Lysophospholipase	metabolic process:GO:0008152;;phospholipase activity:GO:0004620;;lysophospholipase activity:GO:0004622;;phospholipid catabolic process:GO:0009395	01.06 lipid, fatty acid and isoprenoid metabolism N.crassa	01.06.02.01 phospholipid metabolism
estExt_Genewise1Plus.C_1_t40487	estExt_Genewise1Plus.C_1_t40487	estExt_Genewise1Plus.C_1_t40487	scaffold_1:2501829-2503891	56.4258	25.1952	-1.1632	0.00245772	yes	94624	IPR013595:Peptidase S33, tripeptidyl-peptidase C-terminal	sp|P65824|Y2248_MYCBO Putative hydrolase Mb2248c OS=Mycobacterium bovis GN=Mb2248c PE=3 SV=1:99.7525	-	-	-
estExt_Genemark1.C_80158	estExt_Genemark1.C_80158	estExt_Genemark1.C_80158	scaffold_8:592318-593749	403.497	180.063	-1.16406	0.00621424	yes	24894	IPR006931:Calcipressin	sp|Q4R4P5|RCAN2_MACFA Calcipressin-2 OS=Macaca fascicularis GN=RCAN2 PE=2 SV=1:62.3882	-	KOG4019:Calcineurin-mediated signaling pathway inhibitor DSCR1	calcium-mediated signaling:GO:0019722
estExt_Genewise1Plus.C_15_t10081	estExt_Genewise1Plus.C_15_t10081	estExt_Genewise1Plus.C_15_t10081	scaffold_15:128045-129833	38.8191	17.275	-1.16808	0.00571798	yes	101325	IPR004134:Peptidase C1B, bleomycin hydrolase;;IPR000169:Peptidase, cysteine peptidase active site	sp|C7GPC1|BLH1_YEAS2 Cysteine proteinase 1, mitochondrial OS=Saccharomyces cerevisiae (strain JAY291) GN=LAP3 PE=3 SV=2:368.622	3.4.22.40:Bleomycin hydrolase.	KOG4128:Bleomycin hydrolases and aminopeptidases of cysteine protease family	bleomycin hydrolase activity:GO:0008423;;cysteine-type endopeptidase activity:GO:0004197;;proteolysis:GO:0006508	11.02.03.04 transcriptional control	14.07.11 protein processing (proteolytic)	14.13 protein/peptide degradation	14.13.01 cytoplasmic and nuclear protein degradation	32.05.01.01 antibiotic resistance	32.07 detoxification	34.11.03 chemoperception and response	16.19 nucleotide/nucleoside/nucleobase binding S.cerevisiae
e_gw1.12.125.1	e_gw1.12.125.1	e_gw1.12.125.1	scaffold_12:302802-307051	18.0749	8.04196	-1.16837	0.00427162	yes	82487	IPR013253:Kinetochore Spc7	sp|O59757|SPC7_SCHPO Kinetochore protein spc7 OS=Schizosaccharomyces pombe (strain ATCC 38366 / 972) GN=spc7 PE=1 SV=1:153.68	-	KOG2992:Nucleolar GTPase/ATPase p130	-	42.05 centrosome
gm1.5626_g	gm1.5626_g	gm1.5626_g	scaffold_14:572692-578333	41.9595	18.6502	-1.16981	0.00166751	yes	10070	IPR002110:Ankyrin	sp|Q9ULJ7|ANR50_HUMAN Ankyrin repeat domain-containing protein 50 OS=Homo sapiens GN=ANKRD50 PE=1 SV=4:63.929	-	KOG4177:Ankyrin	-
estExt_Genewise1Plus.C_5_t10332	estExt_Genewise1Plus.C_5_t10332	estExt_Genewise1Plus.C_5_t10332	scaffold_5:399141-402704	22.4048	9.95164	-1.1708	0.00618935	yes	97324	IPR007219:Fungal specific transcription factor;;IPR001138:Fungal transcriptional regulatory protein, N-terminal;;IPR016160:Aldehyde dehydrogenase, conserved site	sp|P28349|NIT4_NEUCR Nitrogen assimilation transcription factor nit-4 OS=Neurospora crassa GN=nit-4 PE=4 SV=2:261.151	-	KOG1283:Serine carboxypeptidases	regulation of transcription, DNA-dependent:GO:0006355;;nucleus:GO:0005634;;metabolic process:GO:0008152;;zinc ion binding:GO:0008270;;transcription:GO:0006350;;oxidoreductase activity:GO:0016491;;DNA binding:GO:0003677;;transcription factor activity:GO:0003700	01.02.07.01 regulation of nitrogen metabolism	11.02.03.04.01 transcription activation
gm1.3863_g	gm1.3863_g	gm1.3863_g	scaffold_7:1358339-1359115	743.017	329.993	-1.17096	0.00153407	yes	8307	IPR011146:Histidine triad-like motif;;IPR001310:Histidine triad (HIT) protein	sp|O94586|HNT1_SCHPO Hit family protein 1 OS=Schizosaccharomyces pombe (strain ATCC 38366 / 972) GN=hnt1 PE=2 SV=1:168.703	3.6.1.17:Bis(5'-nucleosyl)-tetraphosphatase (asymmetrical).	KOG3275:Zinc-binding protein of the histidine triad (HIT) family	catalytic activity:GO:0003824;;bis(5'-nucleosyl)-tetraphosphatase (asymmetrical) activity:GO:0004081	01.03 nucleotide/nucleoside/nucleobase metabolism S.cerevisiae	10.03.01 mitotic cell cycle and cell cycle control B.subtilis	16.19 nucleotide/nucleoside/nucleobase binding N.crassa
fgenesh1_pm.4_#_191	fgenesh1_pm.4_#_191	fgenesh1_pm.4_#_191	scaffold_4:631916-635188	33.9405	15.0691	-1.17141	0.002167	yes	128194	IPR001138:Fungal transcriptional regulatory protein, N-terminal	sp|Q04052|ARO80_YEAST Transcriptional activator ARO80 OS=Saccharomyces cerevisiae (strain ATCC 204508 / S288c) GN=ARO80 PE=1 SV=1:90.1225;;sp|Q04052|ARO80_YEAST Transcriptional activator ARO80 OS=Saccharomyces cerevisiae (strain ATCC 204508 / S288c) GN=ARO80 PE=1 SV=1:78.5666	-	KOG3802:Transcription factor OCT-1, contains POU and HOX domains	regulation of transcription, DNA-dependent:GO:0006355;;nucleus:GO:0005634;;zinc ion binding:GO:0008270;;cAMP-dependent protein kinase activity:GO:0004691;;transcription factor activity:GO:0003700;;cAMP-dependent protein kinase complex:GO:0005952	11.02.03.04 transcriptional control
e_gw1.23.42.1	e_gw1.23.42.1	e_gw1.23.42.1	scaffold_23:262427-263983	91.8472	40.7587	-1.17213	0.00781597	yes	88423	IPR001753:Crotonase, core	sp|P34559|ECHM_CAEEL Probable enoyl-CoA hydratase, mitochondrial OS=Caenorhabditis elegans GN=ech-6 PE=1 SV=1:161.77	4.2.1.17:Enoyl-CoA hydratase.	KOG1680:Enoyl-CoA hydratase	metabolic process:GO:0008152;;enoyl-CoA hydratase activity:GO:0004300;;catalytic activity:GO:0003824	01.05 C-compound and carbohydrate metabolism	01.06 lipid, fatty acid and isoprenoid metabolism N.crassa	01.06.05 fatty acid metabolism	02.25 oxidation of fatty acids
estExt_Genemark1.C_90031	estExt_Genemark1.C_90031	estExt_Genemark1.C_90031	scaffold_9:87329-89288	184.834	82.0082	-1.17239	0.00380308	yes	24974	IPR008162:Inorganic pyrophosphatase;;IPR007087:Zinc finger, C2H2-type;;IPR015880:Zinc finger, C2H2-like	sp|Q09838|PRZ1_SCHPO Transcriptional regulator prz1 OS=Schizosaccharomyces pombe (strain ATCC 38366 / 972) GN=prz1 PE=1 SV=1:94.7449	-	KOG1721:FOG: Zn-finger	phosphate metabolic process:GO:0006796;;cytoplasm:GO:0005737;;nucleic acid binding:GO:0003676;;zinc ion binding:GO:0008270;;magnesium ion binding:GO:0000287;;inorganic diphosphatase activity:GO:0004427;;intracellular:GO:0005622	11.02.03.04 transcriptional control	16.17.09 heavy metal binding (Cu, Fe, Zn)
estExt_Genemark1.C_110133	estExt_Genemark1.C_110133	estExt_Genemark1.C_110133	scaffold_11:479257-481230	336.39	149.233	-1.17256	0.00651561	yes	25284	IPR001382:Glycoside hydrolase, family 47	sp|Q2ULB2|MNS1B_ASPOR Mannosyl-oligosaccharide alpha-1,2-mannosidase 1B OS=Aspergillus oryzae (strain ATCC 42149 / RIB 40) GN=mns1B PE=1 SV=1:252.677	3.2.1.113:Mannosyl-oligosaccharide 1,2-alpha-mannosidase.	KOG2204:Mannosyl-oligosaccharide alpha-1,2-mannosidase and related glycosyl hydrolases	calcium ion binding:GO:0005509;;membrane:GO:0016020;;mannosyl-oligosaccharide 1,2-alpha-mannosidase activity:GO:0004571	01.05 C-compound and carbohydrate metabolism	01.05.02 sugar, glucoside, polyol and carboxylate metabolism	01.05.03 polysaccharide metabolism	14.07.02 modification with sugar residues (e.g. glycosylation, deglycosylation) N.crassa	14.07.02.02 N-directed glycosylation, deglycosylation S.cerevisiae	16.17.01 calcium binding
estExt_Genewise1.C_13_t20129	estExt_Genewise1.C_13_t20129	estExt_Genewise1.C_13_t20129	scaffold_13:809095-810772	93.554	41.4738	-1.1736	0.00154267	yes	112574	IPR000717:Proteasome component region PCI	sp|Q10335|RPN7_SCHPO Probable 26S proteasome regulatory subunit rpn7 OS=Schizosaccharomyces pombe (strain ATCC 38366 / 972) GN=rpn7 PE=2 SV=1:307.375	3.4.25.1:Proteasome endopeptidase complex.	KOG0687:26S proteasome regulatory complex, subunit RPN7/PSMD6	threonine endopeptidase activity:GO:0004298;;proteasome endopeptidase activity:GO:0004299	12.04 translation	14.13.01.01 proteasomal degradation (ubiquitin/proteasomal pathway) N.crassa	16.07 structural protein binding
estExt_Genewise1.C_6_t10320	estExt_Genewise1.C_6_t10320	estExt_Genewise1.C_6_t10320	scaffold_6:333506-335226	45.8454	20.3005	-1.17526	0.00407773	yes	109375	IPR006094:FAD linked oxidase, N-terminal;;IPR016166:FAD-binding, type 2	sp|Q15392|DHC24_HUMAN Delta(24)-sterol reductase OS=Homo sapiens GN=DHCR24 PE=1 SV=2:181.03	1.3.1.-:With NAD(+) or NADP(+) as acceptor.	KOG1262:FAD-binding protein DIMINUTO	cis-2,3-dihydrodiol DDT dehydrogenase activity:GO:0018499;;FAD binding:GO:0050660;;2,5-dichloro-2,5-cyclohexadiene-1,4-diol dehydrogenase activity:GO:0018502;;trans-1,2-dihydrodiolphenanthrene dehydrogenase activity:GO:0018503;;catalytic activity:GO:0003824;;oxidoreductase activity:GO:0016491;;enoyl-[acyl-carrier-protein] reductase activity:GO:0016631;;cinnamate reductase activity:GO:0043786;;tra…	01.06.06.11 tetracyclic and pentacyclic triterpenes (cholesterin, steroids and hopanoids) metabolism N.crassa
estExt_Genewise1.C_11_t20052	estExt_Genewise1.C_11_t20052	estExt_Genewise1.C_11_t20052	scaffold_11:684016-685318	63.1581	27.9464	-1.17631	0.00785994	yes	111819	IPR001698:F-actin capping protein, beta subunit	sp|Q4INI2|CAPZB_GIBZE F-actin-capping protein subunit beta OS=Gibberella zeae (strain PH-1 / FGSC 9075 / NRRL 31084) GN=CAP2 PE=3 SV=1:484.182	-	KOG3174:F-actin capping protein, beta subunit	actin cytoskeleton organization and biogenesis:GO:0030036;;actin binding:GO:0003779;;F-actin capping protein complex:GO:0008290	20.09.18.09.01 endocytosis	32.01.03 osmotic and salt stress response	34.05 cell motility	34.11.03.07 pheromone response, mating-type determination, sex-specific proteins S.cerevisiae	40.01 cell growth / morphogenesis	42.01 cell wall	42.04.03 actin cytoskeleton	43.01.03.05 budding, cell polarity and filament formation S.cerevisiae	16.01 protein binding
estExt_Genewise1Plus.C_210423	estExt_Genewise1Plus.C_210423	estExt_Genewise1Plus.C_210423	scaffold_21:548144-550066	127.894	56.5707	-1.17682	0.00141361	yes	102919	IPR016066:Alpha-D-phosphohexomutase, conserved site;;IPR016055:Alpha-D-phosphohexomutase, alpha/beta/alpha I, II and III;;IPR005845:Alpha-D-phosphohexomutase, alpha/beta/alpha domain II;;IPR016657:Phosphoacetylglucosamine mutase;;IPR005843:Alpha-D-phosphohexomutase, C-terminal;;IPR005844:Alpha-D-phosphohexomutase, alpha/beta/alpha domain I	sp|Q9P4V2|AGM1_CANAL Phosphoacetylglucosamine mutase OS=Candida albicans GN=AGM1 PE=1 SV=1:509.22	5.4.2.3:Phosphoacetylglucosamine mutase.	KOG2537:Phosphoglucomutase/phosphomannomutase	carbohydrate metabolic process:GO:0005975;;intramolecular transferase activity, phosphotransferases:GO:0016868;;phosphoacetylglucosamine mutase activity:GO:0004610	01.04 phosphate metabolism	01.05 C-compound and carbohydrate metabolism	01.05.02 sugar, glucoside, polyol and carboxylate metabolism	01.05.09 aminosaccharide metabolism	01.05.09.04 aminosaccharide anabolism	01.05.09.07 aminosaccharide catabolism	16.17 metal binding	16.17.07 magnesium binding
estExt_Genewise1Plus.C_11_t20054	estExt_Genewise1Plus.C_11_t20054	estExt_Genewise1Plus.C_11_t20054	scaffold_11:695090-696253	86.3297	38.172	-1.17734	0.00491038	yes	100202	IPR017447:CS;;IPR008978:HSP20-like chaperone;;IPR007052:CS domain;;IPR007051:CHORD	sp|Q9VCC0|CHRD1_DROME Cysteine and histidine-rich domain-containing protein OS=Drosophila melanogaster GN=CHORD PE=1 SV=1:166.007	-	KOG1667:Zn2+-binding protein Melusin/RAR1, contains CHORD domain	-	30.01 cellular signalling	16.17.01 calcium binding	16.17.09 heavy metal binding (Cu, Fe, Zn)
estExt_Genewise1Plus.C_470007	estExt_Genewise1Plus.C_470007	estExt_Genewise1Plus.C_470007	scaffold_47:7873-10282	84.0065	37.1063	-1.17884	0.0013719	yes	105194	IPR001138:Fungal transcriptional regulatory protein, N-terminal	sp|Q9UT46|MOC3_SCHPO Transcriptional regulatory protein moc3 OS=Schizosaccharomyces pombe (strain ATCC 38366 / 972) GN=moc3 PE=1 SV=3:53.5286	-	-	regulation of transcription, DNA-dependent:GO:0006355;;nucleus:GO:0005634;;zinc ion binding:GO:0008270;;transcription factor activity:GO:0003700
estExt_Genemark1.C_270089	estExt_Genemark1.C_270089	estExt_Genemark1.C_270089	scaffold_27:295867-297156	163.291	72.1209	-1.17896	0.00142347	yes	26573	IPR016040:NAD(P)-binding;;IPR002347:Glucose/ribitol dehydrogenase;;IPR002198:Short-chain dehydrogenase/reductase SDR	sp|Q09851|YAEB_SCHPO Uncharacterized oxidoreductase C23D3.11 OS=Schizosaccharomyces pombe (strain ATCC 38366 / 972) GN=SPAC23D3.11 PE=2 SV=2:181.03	1.1.1.101:Acylglycerone-phosphate reductase.	KOG1209:1-Acyl dihydroxyacetone phosphate reductase and related dehydrogenases	metabolic process:GO:0008152;;catalytic activity:GO:0003824;;binding:GO:0005488;;oxidoreductase activity:GO:0016491;;acylglycerone-phosphate reductase activity:GO:0000140	01.05 C-compound and carbohydrate metabolism	01.06 lipid, fatty acid and isoprenoid metabolism N.crassa	01.06.02.01 phospholipid metabolism	43.01.03.09 development of asco- basidio- or zygospore S.cerevisiae	16.21.07 NAD/NADP binding
gm1.1688_g	gm1.1688_g	gm1.1688_g	scaffold_2:2444674-2445588	190.923	84.3135	-1.17916	0.00170968	yes	6132	IPR000243:Peptidase T1A, proteasome beta-subunit;;IPR001353:20S proteasome, A and B subunits	sp|Q09841|PSB7_SCHPO Probable proteasome subunit beta type-7 OS=Schizosaccharomyces pombe (strain ATCC 38366 / 972) GN=SPAC23D3.07 PE=2 SV=1:343.199	3.4.25.1:Proteasome endopeptidase complex.	KOG0173:20S proteasome, regulatory subunit beta type PSMB7/PSMB10/PUP1	proteasome core complex:GO:0005839;;ubiquitin-dependent protein catabolic process:GO:0006511;;endopeptidase activity:GO:0004175;;threonine endopeptidase activity:GO:0004298;;proteasome endopeptidase activity:GO:0004299	14.07.11 protein processing (proteolytic)	14.13 protein/peptide degradation	14.13.01.01 proteasomal degradation (ubiquitin/proteasomal pathway) S.cerevisiae	32.01 stress response	16.01 protein binding
estExt_fgenesh1_pg.C_60090	estExt_fgenesh1_pg.C_60090	estExt_fgenesh1_pg.C_60090	scaffold_6:283689-284810	65.471	28.8949	-1.18004	0.00982276	yes	140903	IPR000062:Thymidylate kinase	sp|P36590|KTHY_SCHPO Thymidylate kinase OS=Schizosaccharomyces pombe (strain ATCC 38366 / 972) GN=tmp1 PE=2 SV=2:173.326	2.7.4.9:Thymidylate kinase.	KOG3327:Thymidylate kinase/adenylate kinase	dTDP biosynthetic process:GO:0006233;;ATP binding:GO:0005524;;thymidylate kinase activity:GO:0004798;;dTTP biosynthetic process:GO:0006235	01.03.04 pyrimidine nucleotide/nucleoside/nucleobase metabolism N.crassa	01.03.04.03 pyrimidine nucleotide/nucleoside/nucleobase anabolism S.cerevisiae	01.03.07 deoxyribonucleotide metabolism	01.04 phosphate metabolism	10.01.03 DNA synthesis and replication	10.01.05.01 DNA repair	30.01 cellular signalling	16.19.03 ATP binding
estExt_Genewise1Plus.C_3_t10112	estExt_Genewise1Plus.C_3_t10112	estExt_Genewise1Plus.C_3_t10112	scaffold_3:93622-95258	61.4044	27.0419	-1.18314	0.00368434	yes	96123	IPR000590:Hydroxymethylglutaryl-coenzyme A synthase, active site;;IPR013528:Hydroxymethylglutaryl-coenzyme A synthase, N-terminal;;IPR013746:Hydroxymethylglutaryl-coenzyme A synthase C-terminal;;IPR016039:Thiolase-like;;IPR010122:Hydroxymethylglutaryl-CoA synthase, eukaryotic	sp|P54874|HMCS_SCHPO Hydroxymethylglutaryl-CoA synthase OS=Schizosaccharomyces pombe (strain ATCC 38366 / 972) GN=hcs1 PE=1 SV=1:577.015	-	KOG1393:Hydroxymethylglutaryl-CoA synthase	metabolic process:GO:0008152;;hydroxymethylglutaryl-CoA synthase activity:GO:0004421;;catalytic activity:GO:0003824;;isoprenoid biosynthetic process:GO:0008299	01.06 lipid, fatty acid and isoprenoid metabolism	01.06.06 isoprenoid metabolism	01.06.06.11 tetracyclic and pentacyclic triterpenes (cholesterin, steroids and hopanoids) metabolism S.cerevisiae
fgenesh1_pg.9_#_84	fgenesh1_pg.9_#_84	fgenesh1_pg.9_#_84	scaffold_9:313236-319162	19.852	8.7412	-1.18338	0.00154267	yes	35563	IPR011006:CheY-like;;IPR017442:Serine/threonine protein kinase-related;;IPR011009:Protein kinase-like;;IPR001789:Signal transduction response regulator, receiver region;;IPR000719:Protein kinase, core;;IPR002290:Serine/threonine protein kinase;;IPR001245:Tyrosine protein kinase;;IPR008271:Serine/threonine protein kinase, active site;;IPR000408:Regulator of chromosome condensation, RCC1;;IPR000014…	sp|P43565|RIM15_YEAST Serine/threonine-protein kinase RIM15 OS=Saccharomyces cerevisiae (strain ATCC 204508 / S288c) GN=RIM15 PE=1 SV=1:421.394;;sp|P43565|RIM15_YEAST Serine/threonine-protein kinase RIM15 OS=Saccharomyces cerevisiae (strain ATCC 204508 / S288c) GN=RIM15 PE=1 SV=1:123.25	-	KOG0605:NDR and related serine/threonine kinases	casein kinase I activity:GO:0004681;;MP kinase activity:GO:0008339;;transmembrane receptor protein serine/threonine kinase activity:GO:0004675;;NF-kappaB-inducing kinase activity:GO:0004704;;JUN kinase activity:GO:0004705;;AMP-activated protein kinase activity:GO:0004679;;galactosyltransferase-associated kinase activity:GO:0004695;;two-component response regulator activity:GO:0000156;;MAP kinase …	14.07.03 modification by phosphorylation, dephosphorylation, autophosphorylation N.crassa	30.01 cellular signalling
gm1.1308_g	gm1.1308_g	gm1.1308_g	scaffold_2:1063133-1066203	29.7946	13.1152	-1.18382	0.00325415	yes	5752	IPR001452:Src homology-3	-	3.1.4.4:Phospholipase D.	KOG1474:Transcription initiation factor TFIID, subunit BDF1 and related bromodomain proteins	phospholipase D activity:GO:0004630
estExt_Genewise1Plus.C_10_t10287	estExt_Genewise1Plus.C_10_t10287	estExt_Genewise1Plus.C_10_t10287	scaffold_10:394495-395625	165.861	72.6734	-1.19048	0.00155532	yes	99653	IPR007269:Isoprenylcysteine carboxyl methyltransferase	sp|O12947|ICMT_XENLA Protein-S-isoprenylcysteine O-methyltransferase OS=Xenopus laevis GN=icmt PE=2 SV=1:177.178	2.1.1.100:Protein-S isoprenylcysteine O-methyltransferase.	KOG2628:Farnesyl cysteine-carboxyl methyltransferase	integral to membrane:GO:0016021;;protein-S-isoprenylcysteine O-methyltransferase activity:GO:0004671;;C-terminal protein amino acid methylation:GO:0006481	01.05.13.01 S-adenosyl-methionine - homocysteine cycle	01.06 lipid, fatty acid and isoprenoid metabolism N.crassa	14.04 protein targeting, sorting and translocation	14.07.01 modification with fatty acids (e.g. myristylation, palmitylation, farnesylation) N.crassa	14.07.09 posttranslational modification of amino acids (e.g. hydroxylation, methylation)	14.07.11 protein processing (proteolytic)
estExt_Genewise1Plus.C_13_t10395	estExt_Genewise1Plus.C_13_t10395	estExt_Genewise1Plus.C_13_t10395	scaffold_13:530996-533620	87.4471	38.2933	-1.19132	0.00117824	yes	100832	-	-	-	KOG1649:SWI-SNF chromatin remodeling complex, Snf5 subunit	-
e_gw1.2.789.1	e_gw1.2.789.1	e_gw1.2.789.1	scaffold_2:720625-722023	53.793	23.5299	-1.19292	0.00408781	yes	71146	IPR011059:Metal-dependent hydrolase, composite;;IPR006680:Amidohydrolase 1	sp|P40896|YJV3_YEAST Uncharacterized protein YJL213W OS=Saccharomyces cerevisiae (strain ATCC 204508 / S288c) GN=YJL213W PE=2 SV=1:173.326	-	-	hydrolase activity, acting on carbon-nitrogen (but not peptide) bonds:GO:0016810;;hydrolase activity:GO:0016787	14.13 protein/peptide degradation
estExt_fgenesh1_pg.C_160192	estExt_fgenesh1_pg.C_160192	estExt_fgenesh1_pg.C_160192	scaffold_16:747160-750202	18.7504	8.19616	-1.1939	0.00624083	yes	142266	IPR001433:Oxidoreductase FAD/NAD(P)-binding;;IPR013130:Ferric reductase-like transmembrane component, N-terminal;;IPR013112:FAD-binding 8	sp|Q12333|FRE7_YEAST Ferric/cupric reductase transmembrane component 7 OS=Saccharomyces cerevisiae (strain ATCC 204508 / S288c) GN=FRE7 PE=1 SV=2:182.185	-	KOG0039:Ferric reductase, NADH/NADPH oxidase and related proteins	FAD binding:GO:0050660;;electron transport:GO:0006118;;ferric-chelate reductase activity:GO:0000293;;integral to membrane:GO:0016021;;oxidoreductase activity:GO:0016491;;iron ion binding:GO:0005506
e_gw1.26.384.1	e_gw1.26.384.1	e_gw1.26.384.1	scaffold_26:202873-206293	140.466	61.2899	-1.1965	0.0025375	yes	89464	IPR016040:NAD(P)-binding	-	-	KOG4297:C-type lectin	metabolic process:GO:0008152;;catalytic activity:GO:0003824;;binding:GO:0005488
e_gw1.1.867.1	e_gw1.1.867.1	e_gw1.1.867.1	scaffold_1:1431857-1435785	16.9638	7.39974	-1.19692	0.00497687	yes	68623	IPR011006:CheY-like;;IPR005467:Signal transduction histidine kinase, core;;IPR003594:ATP-binding region, ATPase-like;;IPR001789:Signal transduction response regulator, receiver region;;IPR009082:Signal transduction histidine kinase, homodimeric;;IPR003661:Signal transduction histidine kinase, subgroup 1, dimerisation and phosphoacceptor region;;IPR004358:Signal transduction histidine kinase-relat…	sp|O14002|MAK2_SCHPO Peroxide stress-activated histidine kinase mak2 OS=Schizosaccharomyces pombe (strain ATCC 38366 / 972) GN=mak2 PE=2 SV=1:111.694	2.7.3.-:Phosphotransferases with a nitrogenous group as acceptor.	KOG0519:Sensory transduction histidine kinase	protein histidine kinase activity:GO:0004673;;signal transduction:GO:0007165;;regulation of transcription, DNA-dependent:GO:0006355;;two-component signal transduction system (phosphorelay):GO:0000160;;histone arginine kinase activity:GO:0018110;;peptidyl-histidine phosphorylation:GO:0018106;;membrane:GO:0016020;;two-component response regulator activity:GO:0000156;;signal transducer activity:GO:0…
estExt_fgenesh1_pm.C_50244	estExt_fgenesh1_pm.C_50244	estExt_fgenesh1_pm.C_50244	scaffold_5:824103-825158	64.7041	28.1914	-1.1986	0.0074187	yes
estExt_Genewise1Plus.C_5_t20262	estExt_Genewise1Plus.C_5_t20262	estExt_Genewise1Plus.C_5_t20262	scaffold_5:943214-946269	114.054	49.6421	-1.20008	0.00170968	yes	97509	IPR017442:Serine/threonine protein kinase-related;;IPR000719:Protein kinase, core;;IPR002290:Serine/threonine protein kinase;;IPR011009:Protein kinase-like;;IPR008271:Serine/threonine protein kinase, active site;;IPR017441:Protein kinase ATP binding, conserved site;;IPR001245:Tyrosine protein kinase	sp|O59763|OCA2_SCHPO Serine/threonine-protein kinase oca2 OS=Schizosaccharomyces pombe (strain ATCC 38366 / 972) GN=oca2 PE=1 SV=1:424.861	2.7.1.-:Phosphotransferases with an alcohol group as acceptor.	KOG0590:Checkpoint kinase and related serine/threonine protein kinases	LPPG:FO 2-phospho-L-lactate transferase activity:GO:0043743;;(S)-lactate 2-kinase activity:GO:0043841;;cytidine kinase activity:GO:0043771;;phosphatidylinositol phosphate kinase activity:GO:0016307;;glycerate 2-kinase activity:GO:0043798;;eukaryotic elongation factor-2 kinase regulator activity:GO:0042556;;inositol tetrakisphosphate 2-kinase activity:GO:0032942;;eukaryotic elongation factor-2 kin…	14.07.03 modification by phosphorylation, dephosphorylation, autophosphorylation N.crassa	30.01 cellular signalling
estExt_Genewise1Plus.C_7_t20167	estExt_Genewise1Plus.C_7_t20167	estExt_Genewise1Plus.C_7_t20167	scaffold_7:832780-835898	116.917	50.8688	-1.20064	0.00154267	yes	98413	IPR006153:Sodium/hydrogen exchanger	sp|Q9P7I1|KHA1_SCHPO K(+)/H(+) antiporter 1 OS=Schizosaccharomyces pombe (strain ATCC 38366 / 972) GN=kha1 PE=2 SV=1:447.588	-	KOG1650:Predicted K+/H+-antiporter	solute:hydrogen antiporter activity:GO:0015299;;regulation of pH:GO:0006885;;integral to membrane:GO:0016021	20.01.01.01 cation transport (H+, Na+, K+, Ca2+ , NH4+, etc.) N.crassa	34.01.01.01 homeostasis of metal ions (Na, K, Ca etc.) N.crassa	34.01.01.03 homeostasis of protons
e_gw1.9.47.1	e_gw1.9.47.1	e_gw1.9.47.1	scaffold_9:344764-347551	66.1886	28.7839	-1.20132	0.000987199	yes	80145	IPR007219:Fungal specific transcription factor;;IPR001138:Fungal transcriptional regulatory protein, N-terminal	sp|Q9UTN0|YII3_SCHPO Uncharacterized transcriptional regulatory protein C139.03 OS=Schizosaccharomyces pombe (strain ATCC 38366 / 972) GN=SPAC139.03 PE=2 SV=1:105.531	-	-	regulation of transcription, DNA-dependent:GO:0006355;;nucleus:GO:0005634;;zinc ion binding:GO:0008270;;transcription:GO:0006350;;DNA binding:GO:0003677;;transcription factor activity:GO:0003700
estExt_fgenesh1_pg.C_300039	estExt_fgenesh1_pg.C_300039	estExt_fgenesh1_pg.C_300039	scaffold_30:113891-114721	84.0292	36.4965	-1.20313	0.00640208	yes	143047	IPR013217:Methyltransferase type 12	sp|Q1QJC0|TAM_NITHX Trans-aconitate 2-methyltransferase OS=Nitrobacter hamburgensis (strain X14 / DSM 10229) GN=tam PE=3 SV=1:285.034	-	KOG1331:Predicted methyltransferase	-
fgenesh2_kg.12_#_50_#_gi|38140149|gb|CF885467.1|CF885467	fgenesh2_kg.12_#_50_#_gi|38140149|gb|CF885467.1|CF885467	fgenesh2_kg.12_#_50_#_gi|38140149|gb|CF885467.1|CF885467	scaffold_12:414955-415664	702.219	304.933	-1.20343	0.00379545	yes
estExt_Genewise1Plus.C_16_t10311	estExt_Genewise1Plus.C_16_t10311	estExt_Genewise1Plus.C_16_t10311	scaffold_16:368777-370470	52.6695	22.8358	-1.20567	0.00277169	yes	101673	-	-	-	KOG4701:Chitinase	-
estExt_Genewise1Plus.C_1_t50345	estExt_Genewise1Plus.C_1_t50345	estExt_Genewise1Plus.C_1_t50345	scaffold_1:2982691-2984193	91.8572	39.8043	-1.20647	0.00208338	yes	94824	IPR011013:Glycoside hydrolase-type carbohydrate-binding;;IPR008183:Aldose 1-epimerase	sp|Q03161|YMY9_YEAST Glucose-6-phosphate 1-epimerase OS=Saccharomyces cerevisiae (strain ATCC 204508 / S288c) GN=YMR099C PE=1 SV=1:213.772	-	KOG1594:Uncharacterized enzymes related to aldose 1-epimerase	carbohydrate binding:GO:0030246;;carbohydrate metabolic process:GO:0005975;;catalytic activity:GO:0003824;;isomerase activity:GO:0016853
estExt_Genewise1Plus.C_1_t40294	estExt_Genewise1Plus.C_1_t40294	estExt_Genewise1Plus.C_1_t40294	scaffold_1:2281554-2283763	466.056	201.607	-1.20896	0.00892063	yes	94542	IPR017442:Serine/threonine protein kinase-related;;IPR000719:Protein kinase, core;;IPR002290:Serine/threonine protein kinase;;IPR011009:Protein kinase-like;;IPR008271:Serine/threonine protein kinase, active site;;IPR017441:Protein kinase ATP binding, conserved site;;IPR001245:Tyrosine protein kinase	sp|P08092|RAN1_SCHPO Negative regulator of sexual conjugation and meiosis OS=Schizosaccharomyces pombe (strain ATCC 38366 / 972) GN=ran1 PE=1 SV=2:306.22	-	KOG0583:Serine/threonine protein kinase	casein kinase I activity:GO:0004681;;MP kinase activity:GO:0008339;;transmembrane receptor protein serine/threonine kinase activity:GO:0004675;;NF-kappaB-inducing kinase activity:GO:0004704;;JUN kinase activity:GO:0004705;;AMP-activated protein kinase activity:GO:0004679;;galactosyltransferase-associated kinase activity:GO:0004695;;MAP kinase kinase kinase kinase activity:GO:0008349;;ATP binding:…
gm1.2494_g	gm1.2494_g	gm1.2494_g	scaffold_4:866229-867588	216.274	93.3664	-1.21189	0.00081959	yes	6938	IPR001412:Aminoacyl-tRNA synthetase, class I, conserved site	sp|Q54GD8|PX24C_DICDI PXMP2/4 family protein 3 OS=Dictyostelium discoideum GN=DDB_G0290223 PE=3 SV=1:67.3958	-	KOG1944:Peroxisomal membrane protein MPV17 and related proteins	cytoplasm:GO:0005737;;ATP binding:GO:0005524;;tRNA aminoacylation for protein translation:GO:0006418;;translation:GO:0006412;;aminoacyl-tRNA ligase activity:GO:0004812;;nucleotide binding:GO:0000166
estExt_Genemark1.C_130014	estExt_Genemark1.C_130014	estExt_Genemark1.C_130014	scaffold_13:54864-56201	74.7651	32.2697	-1.21219	0.00589779	yes	25470	IPR002744:Protein of unknown function DUF59	sp|P38829|YHS2_YEAST MIP18 family protein YHR122W OS=Saccharomyces cerevisiae (strain ATCC 204508 / S288c) GN=YHR122W PE=1 SV=1:171.014	-	KOG3381:Uncharacterized conserved protein	-
e_gw1.6.523.1	e_gw1.6.523.1	e_gw1.6.523.1	scaffold_6:429402-431217	64.8153	27.8643	-1.21792	0.00227584	yes	76443	IPR016715:PAF acetylhydrolase;;IPR005065:Platelet-activating factor acetylhydrolase, plasma/intracellular isoform II	sp|Q9URV1|PLG7_SCHPO Putative phospholipase A2 OS=Schizosaccharomyces pombe (strain ATCC 38366 / 972) GN=plg7 PE=2 SV=1:101.293	3.1.1.47:2-acetyl-1-alkylglycerophosphocholine esterase.	KOG3847:Phospholipase A2 (platelet-activating factor acetylhydrolase in humans)	lipid catabolic process:GO:0016042;;1-alkyl-2-acetylglycerophosphocholine esterase activity:GO:0003847;;2-acetyl-1-alkylglycerophosphocholine esterase complex:GO:0008247	14.07.04 modification by acetylation, deacetylation N.crassa
e_gw1.30.206.1	e_gw1.30.206.1	e_gw1.30.206.1	scaffold_30:272633-275128	26.5893	11.4262	-1.2185	0.00856654	yes	90749	IPR000253:Forkhead-associated	sp|Q04383|PLM2_YEAST Protein PLM2 OS=Saccharomyces cerevisiae (strain ATCC 204508 / S288c) GN=PLM2 PE=1 SV=1:105.145	5.99.1.2:DNA topoisomerase.	KOG2992:Nucleolar GTPase/ATPase p130	DNA topoisomerase type I activity:GO:0003917	10.03.01 mitotic cell cycle and cell cycle control N.crassa	11.02.03.04 transcriptional control
estExt_Genewise1Plus.C_410097	estExt_Genewise1Plus.C_410097	estExt_Genewise1Plus.C_410097	scaffold_41:91366-95832	48.7137	20.9176	-1.21961	0.000942914	yes	105000	IPR013026:Tetratricopeptide region	sp|A7ENU3|TIF31_SCLS1 Protein TIF31 homolog OS=Sclerotinia sclerotiorum (strain ATCC 18683 / 1980 / Ss-1) GN=tif31 PE=3 SV=1:1605.11	-	KOG1839:Uncharacterized protein CLU1/cluA/TIF31 involved in mitochondrial morphology/distribution, also found associated with eIF-3	-	10.03.03 cytokinesis (cell division) /septum formation and hydrolysis N.crassa	12.04.01 translation initiation	42.16 mitochondrion
estExt_fgenesh1_pg.C_2_t10055	estExt_fgenesh1_pg.C_2_t10055	estExt_fgenesh1_pg.C_2_t10055	scaffold_2:149020-154162	155.003	66.5533	-1.21972	0.00588781	yes	140064	IPR009014:Transketolase, C-terminal/Pyruvate-ferredoxin oxidoreductase, domain II;;IPR006067:Nitrite and sulphite reductase 4Fe-4S region;;IPR008254:Flavodoxin/nitric oxide synthase;;IPR001094:Flavodoxin-like;;IPR002880:Pyruvate flavodoxin/ferredoxin oxidoreductase, N-terminal;;IPR005117:Nitrite/sulphite reductase, hemoprotein beta-component, ferrodoxin-like;;IPR011786:Sulphite reductase (NADPH) …	sp|P47169|ECM17_YEAST Sulfite reductase [NADPH] subunit beta OS=Saccharomyces cerevisiae (strain ATCC 204508 / S288c) GN=ECM17 PE=1 SV=1:1309.66	1.2.1.51:Pyruvate dehydrogenase (NADP+).	KOG0560:Sulfite reductase (ferredoxin)	sulfite reductase (NADPH) activity:GO:0004783;;FMN binding:GO:0010181;;iron ion binding:GO:0005506;;pyruvate dehydrogenase (NADP+) activity:GO:0050243;;metabolic process:GO:0008152;;amino acid biosynthetic process:GO:0008652;;electron transport:GO:0006118;;electron carrier activity:GO:0009055;;catalytic activity:GO:0003824;;4 iron, 4 sulfur cluster binding:GO:0051539;;NADP binding:GO:0050661;;sul…	01.01 amino acid metabolism	01.01.06.05.01.01 biosynthesis of homocysteine	01.02 nitrogen, sulfur and selenium metabolism N.crassa	01.02.03.01 sulfate assimilation	42.01 cell wall	16.21.07 NAD/NADP binding
fgenesh1_pm.45_#_1	fgenesh1_pm.45_#_1	fgenesh1_pm.45_#_1	scaffold_45:1822-3972	44.9402	19.2925	-1.21997	0.00196876	yes	134979	IPR007258:Vps52/Sac2	sp|Q9UST3|VPS52_SCHPO Vacuolar protein sorting-associated protein 52 OS=Schizosaccharomyces pombe (strain ATCC 38366 / 972) GN=vps52 PE=2 SV=1:233.802	-	KOG1961:Vacuolar sorting protein VPS52/suppressor of actin Sac2	-	20.09.07 vesicular transport (Golgi network, etc.) N.crassa
estExt_Genewise1Plus.C_12_t10402	estExt_Genewise1Plus.C_12_t10402	estExt_Genewise1Plus.C_12_t10402	scaffold_12:579385-580500	92.3942	39.6447	-1.22067	0.0024747	yes	100508	IPR007087:Zinc finger, C2H2-type;;IPR015880:Zinc finger, C2H2-like	sp|Q9QZ48|ZBT7A_RAT Zinc finger and BTB domain-containing protein 7A OS=Rattus norvegicus GN=Zbtb7a PE=2 SV=1:66.6254	-	KOG1721:FOG: Zn-finger	nucleic acid binding:GO:0003676;;zinc ion binding:GO:0008270;;intracellular:GO:0005622
estExt_Genewise1Plus.C_1_t40499	estExt_Genewise1Plus.C_1_t40499	estExt_Genewise1Plus.C_1_t40499	scaffold_1:2513241-2515330	159.358	68.3151	-1.222	0.00108975	yes	94633	-	sp|Q10260|YD2C_SCHPO Uncharacterized protein C56F8.12 OS=Schizosaccharomyces pombe (strain ATCC 38366 / 972) GN=SPAC56F8.12 PE=2 SV=1:108.227	-	-	-
estExt_Genewise1Plus.C_4_t20387	estExt_Genewise1Plus.C_4_t20387	estExt_Genewise1Plus.C_4_t20387	scaffold_4:1078501-1083504	58.9565	25.2285	-1.2246	0.00083149	yes	97054	IPR006118:Recombinase, conserved site;;IPR003593:AAA+ ATPase, core;;IPR011527:ABC transporter, transmembrane region, type 1;;IPR001140:ABC transporter, transmembrane region;;IPR003439:ABC transporter-like	sp|P36619|PMD1_SCHPO Leptomycin B resistance protein pmd1 OS=Schizosaccharomyces pombe (strain ATCC 38366 / 972) GN=pmd1 PE=2 SV=2:776.163	-	KOG0055:Multidrug/pheromone exporter, ABC superfamily	nucleoside-triphosphatase activity:GO:0017111;;recombinase activity:GO:0000150;;integral to membrane:GO:0016021;;nucleotide binding:GO:0000166;;ATPase activity, coupled to transmembrane movement of substances:GO:0042626;;ATP binding:GO:0005524;;DNA recombination:GO:0006310;;transport:GO:0006810;;ATPase activity:GO:0016887	01.04 phosphate metabolism	20.01.01.01 cation transport (H+, Na+, K+, Ca2+ , NH4+, etc.)	20.01.03 C-compound and carbohydrate transport	20.01.09 peptide transport	20.01.27 drug/toxin transport	20.09.16 cellular export and secretion	20.09.16.01 Type I protein secretion system (ABC-type transport systems) N.crassa	32.05.01 resistance proteins	32.07.05 detoxification by export	34.11.03 chemoperception and response	34.11.03.07 pheromone response, mating-type determination, sex-specific proteins S.cerevisiae	16.19 nucleotide/nucleoside/nucleobase binding	16.19.03 ATP binding	20.03 transport facilities	20.03.22 transport ATPases	20.03.25 ABC transporters
estExt_Genewise1.C_1_t50148	estExt_Genewise1.C_1_t50148	estExt_Genewise1.C_1_t50148	scaffold_1:2706916-2707937	56.0609	23.9703	-1.22575	0.0093239	yes	106309	IPR016040:NAD(P)-binding;;IPR002347:Glucose/ribitol dehydrogenase;;IPR002198:Short-chain dehydrogenase/reductase SDR	sp|O18404|HCD2_DROME 3-hydroxyacyl-CoA dehydrogenase type-2 OS=Drosophila melanogaster GN=scu PE=1 SV=1:174.096	-	KOG1199:Short-chain alcohol dehydrogenase/3-hydroxyacyl-CoA dehydrogenase	metabolic process:GO:0008152;;catalytic activity:GO:0003824;;binding:GO:0005488;;oxidoreductase activity:GO:0016491	01.06 lipid, fatty acid and isoprenoid metabolism N.crassa	02.25 oxidation of fatty acids
e_gw1.9.72.1	e_gw1.9.72.1	e_gw1.9.72.1	scaffold_9:991910-993575	220.195	94.1417	-1.22588	0.00115788	yes	79570	IPR007865:Peptidase M24B, X-Pro dipeptidase/aminopeptidase P N-terminal;;IPR000994:Peptidase M24, catalytic core	sp|P43590|YFH6_YEAST Uncharacterized peptidase YFR006W OS=Saccharomyces cerevisiae (strain ATCC 204508 / S288c) GN=YFR006W PE=1 SV=1:365.155	3.4.13.9:Xaa-Pro dipeptidase.	KOG2737:Putative metallopeptidase	X-Pro dipeptidase activity:GO:0004251;;metalloexopeptidase activity:GO:0008235;;manganese ion binding:GO:0030145;;X-Pro aminopeptidase activity:GO:0008451;;proteolysis:GO:0006508	14.13 protein/peptide degradation
estExt_Genemark1.C_50315	estExt_Genemark1.C_50315	estExt_Genemark1.C_50315	scaffold_5:1261850-1263869	66.0849	28.209	-1.22817	0.00156157	yes	24422	IPR007114:Major facilitator superfamily;;IPR011701:Major facilitator superfamily MFS-1;;IPR016196:MFS general substrate transporter	sp|Q9US44|YIZG_SCHPO Uncharacterized transporter C1002.16c OS=Schizosaccharomyces pombe (strain ATCC 38366 / 972) GN=SPAC1002.16c PE=2 SV=1:305.064	-	KOG2533:Permease of the major facilitator superfamily	transporter activity:GO:0005215;;integral to membrane:GO:0016021;;transport:GO:0006810	20.01.03 C-compound and carbohydrate transport	20.01.23 allantoin and allantoate transport	20.01.25 vitamine/cofactor transport	20.09.18 cellular import	20.09.18.07 non-vesicular cellular import	20.03 transport facilities
e_gw1.23.97.1	e_gw1.23.97.1	e_gw1.23.97.1	scaffold_23:296312-298842	136.076	58.0069	-1.23011	0.000683743	yes	88293	IPR016040:NAD(P)-binding;;IPR005097:Saccharopine dehydrogenase	sp|Q9P4R4|LYS9_MAGO7 Saccharopine dehydrogenase [NADP+, L-glutamate-forming] OS=Magnaporthe oryzae (strain 70-15 / FGSC 8958) GN=LYS3 PE=1 SV=2:732.635	1.5.1.10:Saccharopine dehydrogenase (NADP+, L-glutamate forming).	KOG0172:Lysine-ketoglutarate reductase/saccharopine dehydrogenase	saccharopine dehydrogenase (NADP+, L-glutamate-forming) activity:GO:0004755;;metabolic process:GO:0008152;;catalytic activity:GO:0003824;;binding:GO:0005488	01.01.06.06.01 biosynthesis of lysine	01.01.06.06.01.03 aminoadipic acid pathway	01.01.06.06.02 degradation of lysine	16.21.07 NAD/NADP binding
estExt_Genewise1Plus.C_260077	estExt_Genewise1Plus.C_260077	estExt_Genewise1Plus.C_260077	scaffold_26:85531-87454	242.513	103.359	-1.2304	0.0016052	yes	103593	IPR011011:Zinc finger, FYVE/PHD-type	-	-	-	zinc ion binding:GO:0008270
gm1.7236_g	gm1.7236_g	gm1.7236_g	scaffold_23:321264-323050	156.461	66.609	-1.23201	0.00124742	yes	11680	IPR005178:Protein of unknown function DUF300	sp|Q54PI4|T1841_DICDI Transmembrane protein 184 homolog DDB_G0284525 OS=Dictyostelium discoideum GN=tmem184A PE=3 SV=1:152.14	-	KOG2641:Predicted seven transmembrane receptor - rhodopsin family	-
estExt_Genewise1.C_7_t20368	estExt_Genewise1.C_7_t20368	estExt_Genewise1.C_7_t20368	scaffold_7:1072894-1075121	82.0804	34.9352	-1.23236	0.000742679	yes	110113	IPR008950:GroEL-like chaperone, ATPase;;IPR002423:Chaperonin Cpn60/TCP-1;;IPR002194:Chaperonin TCP-1, conserved site;;IPR012720:T-complex protein 1, eta subunit;;IPR001844:Chaperonin Cpn60;;IPR017441:Protein kinase ATP binding, conserved site	sp|P87153|TCPH_SCHPO Probable T-complex protein 1 subunit eta OS=Schizosaccharomyces pombe (strain ATCC 38366 / 972) GN=cct7 PE=1 SV=1:821.231	-	KOG0361:Chaperonin complex component, TCP-1 eta subunit (CCT7)	unfolded protein binding:GO:0051082;;ATP binding:GO:0005524;;protein folding:GO:0006457;;protein kinase activity:GO:0004672;;protein binding:GO:0005515;;cellular protein metabolic process:GO:0044267;;protein amino acid phosphorylation:GO:0006468	14.01 protein folding and stabilization	14.07.05 modification by ubiquitination, deubiquitination	14.13.01 cytoplasmic and nuclear protein degradation T.acidophilum	32.01 stress response	32.01.07 unfolded protein response (e.g. ER quality control) S.cerevisiae	42.04 cytoskeleton/structural proteins	16.01 protein binding	16.19.03 ATP binding	20.03 transport facilities
fgenesh1_pm.13_#_80	fgenesh1_pm.13_#_80	fgenesh1_pm.13_#_80	scaffold_13:279668-282047	24.8698	10.5842	-1.23249	0.00583303	yes	131273	IPR011046:WD40 repeat-like;;IPR001680:WD40 repeat	sp|O13985|YEG3_SCHPO Uncharacterized WD repeat-containing protein C26H5.03 OS=Schizosaccharomyces pombe (strain ATCC 38366 / 972) GN=SPAC26H5.03 PE=1 SV=2:289.656;;sp|O13985|YEG3_SCHPO Uncharacterized WD repeat-containing protein C26H5.03 OS=Schizosaccharomyces pombe (strain ATCC 38366 / 972) GN=SPAC26H5.03 PE=1 SV=2:96.2857	-	KOG1009:Chromatin assembly complex 1 subunit B/CAC2 (contains WD40 repeats)	-	10.01.03 DNA synthesis and replication	10.01.09.05 DNA conformation modification (e.g. chromatin) N.crassa	14.10 assembly of protein complexes
estExt_fgenesh1_pm.C_1_t20316	estExt_fgenesh1_pm.C_1_t20316	estExt_fgenesh1_pm.C_1_t20316	scaffold_1:2805214-2806871	64.5761	27.3987	-1.23689	0.00130224	yes
e_gw1.47.37.1	e_gw1.47.37.1	e_gw1.47.37.1	scaffold_47:48758-51935	52.6636	22.3432	-1.23697	0.000653506	yes	93139	IPR007484:Peptidase M28	sp|P38244|YBS4_YEAST Uncharacterized zinc metalloprotease YBR074W OS=Saccharomyces cerevisiae (strain ATCC 204508 / S288c) GN=YBR074W/YBR075W PE=1 SV=2:266.929	-	KOG2194:Aminopeptidases of the M20 family	peptidase activity:GO:0008233;;proteolysis:GO:0006508
estExt_Genewise1Plus.C_13_t10377	estExt_Genewise1Plus.C_13_t10377	estExt_Genewise1Plus.C_13_t10377	scaffold_13:491212-493427	175.758	74.5315	-1.23767	0.00117824	yes	100822	IPR008930:Terpenoid cylases/protein prenyltransferase alpha-alpha toroid;;IPR001330:Prenyltransferase/squalene oxidase	sp|Q8K2I1|FNTB_MOUSE Protein farnesyltransferase subunit beta OS=Mus musculus GN=Fntb PE=2 SV=1:262.692	-	KOG0365:Beta subunit of farnesyltransferase	catalytic activity:GO:0003824;;protein farnesyltransferase activity:GO:0004660	01.06 lipid, fatty acid and isoprenoid metabolism N.crassa	01.06.06 isoprenoid metabolism	14.07.01 modification with fatty acids (e.g. myristylation, palmitylation, farnesylation)	30.01 cellular signalling	16.17 metal binding	16.17.09 heavy metal binding (Cu, Fe, Zn)
estExt_Genewise1Plus.C_13_t10430	estExt_Genewise1Plus.C_13_t10430	estExt_Genewise1Plus.C_13_t10430	scaffold_13:569936-573276	19.2717	8.17083	-1.23793	0.00376576	yes	100846	IPR012337:Polynucleotidyl transferase, Ribonuclease H fold;;IPR014811:Region of unknown function DUF1785;;IPR003165:Stem cell self-renewal protein Piwi;;IPR003100:Argonaute and Dicer protein, PAZ	sp|Q8CJG0|AGO2_MOUSE Protein argonaute-2 OS=Mus musculus GN=Eif2c2 PE=1 SV=2:292.352	-	KOG1041:Translation initiation factor 2C (eIF-2C) and related proteins	nucleic acid binding:GO:0003676	12.07 translational control	32.05.03 defense related proteins
estExt_Genewise1Plus.C_15_t10238	estExt_Genewise1Plus.C_15_t10238	estExt_Genewise1Plus.C_15_t10238	scaffold_15:333552-336215	116.413	49.3261	-1.23883	0.00105632	yes	101389	IPR006022:Staphylococcus nuclease subtype;;IPR002999:Tudor;;IPR016071:Staphylococcal nuclease (SNase-like), OB-fold;;IPR008191:Maternal tudor protein;;IPR016685:RNA-induced silencing complex, nuclease component Tudor-SN;;IPR006021:Staphylococcal nuclease (SNase-like)	sp|Q9Y7U7|SND1_SCHPO Staphylococcal nuclease domain-containing protein 1 OS=Schizosaccharomyces pombe (strain ATCC 38366 / 972) GN=snd1 PE=1 SV=1:520.39	-	KOG2039:Transcriptional coactivator p100	nucleic acid binding:GO:0003676;;RNA interference:GO:0016246;;protein binding:GO:0005515;;nuclease activity:GO:0004518;;RNA-induced silencing complex:GO:0016442	01.03.16 polynucleotide degradation	10.01.09.05 DNA conformation modification (e.g. chromatin)	11.02 RNA synthesis	11.02.03.04 transcriptional control	42.10.03 organization of chromosome structure	18.02.09 regulator of transcription factor
fgenesh2_kg.7_#_87_#_gi|30120319|gb|CB905661.1|CB905661	fgenesh2_kg.7_#_87_#_gi|30120319|gb|CB905661.1|CB905661	fgenesh2_kg.7_#_87_#_gi|30120319|gb|CB905661.1|CB905661	scaffold_7:748300-749424	1008.84	427.26	-1.23951	0.00192215	yes	118698	IPR005818:Histone H1/H5;;IPR005819:Histone H5	sp|Q8J0U2|H1_NEUCR Histone H1 OS=Neurospora crassa GN=hh1 PE=3 SV=1:123.25	-	KOG4012:Histone H1	nucleus:GO:0005634;;nucleosome assembly:GO:0006334;;nucleosome:GO:0000786;;DNA binding:GO:0003677
fgenesh1_pm.41_#_35	fgenesh1_pm.41_#_35	fgenesh1_pm.41_#_35	scaffold_41:98937-101714	75.4452	31.8395	-1.24461	0.000591554	yes	134881	IPR001300:Peptidase C2, calpain	sp|Q7RZP7|PALB_NEUCR Calpain-like protease palB/rim-13 OS=Neurospora crassa GN=rim-13 PE=3 SV=2:622.468	3.4.22.-:Cysteine endopeptidases.	KOG0045:Cytosolic Ca2+-dependent cysteine protease (calpain), large subunit (EF-Hand protein superfamily)	calcium-dependent cysteine-type endopeptidase activity:GO:0004198;;cysteine-type endopeptidase activity:GO:0004197;;proteolysis:GO:0006508;;intracellular:GO:0005622	14.13 protein/peptide degradation	34.11.03.11 pH response
estExt_fgenesh1_pm.C_2_t20235	estExt_fgenesh1_pm.C_2_t20235	estExt_fgenesh1_pm.C_2_t20235	scaffold_2:2520618-2521721	112.134	47.2974	-1.24539	0.00110916	yes	136094	-	-	-	KOG1216:von Willebrand factor and related coagulation proteins	-
fgenesh1_pm.7_#_344	fgenesh1_pm.7_#_344	fgenesh1_pm.7_#_344	scaffold_7:1142020-1144509	49.4364	20.8464	-1.24578	0.00102132	yes	129671	IPR007604:CP2 transcription factor	sp|Q5M7R9|GRHL2_XENTR Grainyhead-like protein 2 homolog OS=Xenopus tropicalis GN=grhl2 PE=2 SV=1:95.5153	-	KOG4091:Transcription factor	-	11.02.03.04 transcriptional control
estExt_Genewise1Plus.C_6_t20263	estExt_Genewise1Plus.C_6_t20263	estExt_Genewise1Plus.C_6_t20263	scaffold_6:855225-857060	297.235	125.125	-1.24823	0.00425224	yes	97943	IPR009006:Alanine racemase/group IV decarboxylase, C-terminal;;IPR000183:Orn/DAP/Arg decarboxylase 2;;IPR002433:Ornithine decarboxylase	sp|P27121|DCOR_NEUCR Ornithine decarboxylase OS=Neurospora crassa GN=spe-1 PE=2 SV=1:628.246	4.1.1.17:Ornithine decarboxylase.	KOG0622:Ornithine decarboxylase	ornithine decarboxylase activity:GO:0004586;;polyamine biosynthetic process:GO:0006596;;catalytic activity:GO:0003824	01.01.05.01 metabolism of polyamines	01.01.05.01.01 biosynthesis of polyamines	01.07.01 biosynthesis of vitamins, cofactors, and prosthetic groups S.cerevisiae	01.20.17.03 metabolism of amines	01.20.31 metabolism of secondary products derived from L-lysine, L-arginine and L-histidine	42.01 cell wall
estExt_fgenesh1_pm.C_50302	estExt_fgenesh1_pm.C_50302	estExt_fgenesh1_pm.C_50302	scaffold_5:1091402-1093006	64.2847	27.06	-1.24831	0.00144087	yes	136656	IPR001138:Fungal transcriptional regulatory protein, N-terminal	-	6.3.2.-:Acid--D-amino-acid ligases (peptide synthases).	KOG2510:SWI-SNF chromatin-remodeling complex protein	regulation of transcription, DNA-dependent:GO:0006355;;nucleus:GO:0005634;;coenzyme F420-0 gamma-glutamyl ligase activity:GO:0043773;;transcription factor activity:GO:0003700;;UDP-N-acetylmuramoylalanyl-D-glutamyl-2,6-diaminopimelate-D-alanyl-D-alanine ligase activity:GO:0008766;;zinc ion binding:GO:0008270;;ribosomal S6-glutamic acid ligase activity:GO:0018169;;coenzyme F420-2 alpha-glutamyl lig…
e_gw1.33.29.1	e_gw1.33.29.1	e_gw1.33.29.1	scaffold_33:59613-61306	117.439	49.3473	-1.25086	0.000530197	yes	91527	IPR008758:Peptidase S28	sp|Q1PF50|EDA2_ARATH Probable serine protease EDA2 OS=Arabidopsis thaliana GN=EDA2 PE=2 SV=2:105.531	3.4.-.-:Acting on peptide bonds (peptide hydrolases).	KOG2182:Hydrolytic enzymes of the alpha/beta hydrolase fold	cysteine-type peptidase activity:GO:0008234;;serine-type peptidase activity:GO:0008236;;proteolysis:GO:0006508	14.07.11 protein processing (proteolytic)
estExt_Genewise1.C_1_t10041	estExt_Genewise1.C_1_t10041	estExt_Genewise1.C_1_t10041	scaffold_1:45848-47553	201.551	84.5573	-1.25314	0.00114492	yes	105323	-	sp|P14248|RPB1_PLAFD DNA-directed RNA polymerase II subunit RPB1 OS=Plasmodium falciparum (isolate CDC / Honduras) GN=RPII PE=3 SV=1:58.151	2.7.7.6:DNA-directed RNA polymerase.	KOG0260:RNA polymerase II, large subunit	RNA polymerase activity:GO:0034062;;DNA-directed RNA polymerase III activity:GO:0003902;;DNA-directed RNA polymerase I activity:GO:0003900;;DNA-directed RNA polymerase II activity:GO:0003901;;DNA-directed RNA polymerase activity:GO:0003899
estExt_Genewise1.C_270382	estExt_Genewise1.C_270382	estExt_Genewise1.C_270382	scaffold_27:417060-418212	92.6236	38.7639	-1.25667	0.0030173	yes	115504	IPR002925:Dienelactone hydrolase	sp|P39721|AIM2_YEAST Protein AIM2 OS=Saccharomyces cerevisiae (strain ATCC 204508 / S288c) GN=AIM2 PE=1 SV=1:170.244	-	KOG3043:Predicted hydrolase related to dienelactone hydrolase	hydrolase activity:GO:0016787
estExt_Genemark1.C_290032	estExt_Genemark1.C_290032	estExt_Genemark1.C_290032	scaffold_29:135558-137801	452.032	188.945	-1.25846	0.00276267	yes	26662	IPR000806:Rab GDI protein;;IPR002005:Rab GTPase activator	sp|P39958|GDI1_YEAST Rab GDP-dissociation inhibitor OS=Saccharomyces cerevisiae (strain ATCC 204508 / S288c) GN=GDI1 PE=1 SV=1:541.191	-	KOG1439:RAB proteins geranylgeranyltransferase component A (RAB escort protein)	protein transport:GO:0015031;;Rab GDP-dissociation inhibitor activity:GO:0005093;;regulation of GTPase activity:GO:0043087	20.09.13 vacuolar/lysosomal transport	20.09.16 cellular export and secretion	30.01 cellular signalling	18.01.07 regulation by binding / dissociation	18.02.01.01.01 GTPase activator (GAP)	18.02.01.02.01 GTPase inhibitor (GIP)	18.02.05 regulator of G-protein signalling
e_gw1.5.340.1	e_gw1.5.340.1	e_gw1.5.340.1	scaffold_5:1137148-1138786	34.021	14.2107	-1.25944	0.00447524	yes	75910	IPR000504:RNA recognition motif, RNP-1	sp|O74452|SCW1_SCHPO Cell wall integrity protein scw1 OS=Schizosaccharomyces pombe (strain ATCC 38366 / 972) GN=scw1 PE=1 SV=1:148.673	-	KOG0118:FOG: RRM domain	nucleic acid binding:GO:0003676	40.01 cell growth / morphogenesis	43.01.03.05 budding, cell polarity and filament formation N.crassa
e_gw1.3.399.1	e_gw1.3.399.1	e_gw1.3.399.1	scaffold_3:257317-259772	89.0031	37.1005	-1.26242	0.000472931	yes	73038	IPR001375:Peptidase S9, prolyl oligopeptidase active site region	sp|A7UKV4|DPP5_TRIEQ Dipeptidyl-peptidase 5 OS=Trichophyton equinum GN=DPP5 PE=3 SV=1:561.222	3.4.14.-:Dipeptidyl-peptidases and tripeptidyl-peptidases.	KOG2100:Dipeptidyl aminopeptidase	serine-type peptidase activity:GO:0008236;;tripeptidyl-peptidase activity:GO:0008240;;proteolysis:GO:0006508	14.13 protein/peptide degradation
estExt_fgenesh1_pm.C_1_t30012	estExt_fgenesh1_pm.C_1_t30012	estExt_fgenesh1_pm.C_1_t30012	scaffold_1:3369988-3372898	216.453	90.0452	-1.26533	0.00245772	yes	135691	IPR003593:AAA+ ATPase, core;;IPR003959:AAA ATPase, core;;IPR000454:ATPase, F0 complex, subunit C	sp|P46468|CDAT_PLAF7 Putative cell division cycle ATPase OS=Plasmodium falciparum (isolate 3D7) GN=PF07_0047 PE=3 SV=2:60.8474	-	KOG0742:AAA+-type ATPase	nucleoside-triphosphatase activity:GO:0017111;;proton-transporting two-sector ATPase complex:GO:0016469;;hydrogen ion transporting ATP synthase activity, rotational mechanism:GO:0046933;;nucleotide binding:GO:0000166;;membrane:GO:0016020;;ATP binding:GO:0005524;;ATP synthesis coupled proton transport:GO:0015986;;hydrogen ion transporting ATPase activity, rotational mechanism:GO:0046961
gm1.5341_g	gm1.5341_g	gm1.5341_g	scaffold_13:358090-359133	46.0957	19.1627	-1.26633	0.00778878	yes	9785	IPR002661:Ribosome recycling factor	-	-	KOG4797:Transcriptional regulator	translation:GO:0006412
estExt_fgenesh1_pm.C_60154	estExt_fgenesh1_pm.C_60154	estExt_fgenesh1_pm.C_60154	scaffold_6:438902-443525	114.538	47.4896	-1.27014	0.00126258	yes	136748	IPR008930:Terpenoid cylases/protein prenyltransferase alpha-alpha toroid;;IPR002365:Terpene synthase;;IPR001330:Prenyltransferase/squalene oxidase;;IPR007699:SGS;;IPR017447:CS;;IPR008978:HSP20-like chaperone;;IPR007052:CS domain	sp|Q96WJ0|ERG7_PNECA Lanosterol synthase OS=Pneumocystis carinii GN=ERG7 PE=2 SV=1:804.668	5.4.99.7:Lanosterol synthase.	KOG0497:Oxidosqualene-lanosterol cyclase and related proteins	lyase activity:GO:0016829;;metabolic process:GO:0008152;;catalytic activity:GO:0003824;;lanosterol synthase activity:GO:0000250	01.06 lipid, fatty acid and isoprenoid metabolism N.crassa	01.06.06.11 tetracyclic and pentacyclic triterpenes (cholesterin, steroids and hopanoids) metabolism	01.20 secondary metabolism
estExt_Genewise1.C_3_t20058	estExt_Genewise1.C_3_t20058	estExt_Genewise1.C_3_t20058	scaffold_3:671645-672363	240.23	99.6015	-1.27018	0.00282862	yes	107951	IPR006056:YjgF-like protein;;IPR006175:Endoribonuclease L-PSP;;IPR013813:Endoribonuclease L-PSP/chorismate mutase-like	sp|P37552|YABJ_BACSU RutC family protein yabJ OS=Bacillus subtilis GN=yabJ PE=1 SV=3:128.257	-	KOG2317:Putative translation initiation inhibitor UK114/IBM1	-	01.01.11.02.01 biosynthesis of isoleucine	01.03.01 purin nucleotide/nucleoside/nucleobase metabolism B.subtilis	11.02.03.04 transcriptional control	32.01 stress response	32.01.05 heat shock response	34.11.03.07 pheromone response, mating-type determination, sex-specific proteins N.crassa	42.16 mitochondrion
estExt_fgenesh1_pm.C_2_t10367	estExt_fgenesh1_pm.C_2_t10367	estExt_fgenesh1_pm.C_2_t10367	scaffold_2:1289038-1292363	62.0453	25.6343	-1.27524	0.000442181	yes	135899	IPR003111:Peptidase S16, lon N-terminal;;IPR003593:AAA+ ATPase, core;;IPR003959:AAA ATPase, core;;IPR008269:Peptidase S16, lon C-terminal;;IPR001984:Peptidase S16, Lon protease;;IPR004815:Peptidase S16, ATP-dependent protease La	sp|Q7SA85|LONP2_NEUCR Lon protease homolog 2, peroxisomal OS=Neurospora crassa GN=NCU08303 PE=3 SV=1:1266.14	3.4.21.53:Endopeptidase La.	KOG2004:Mitochondrial ATP-dependent protease PIM1/LON	nucleoside-triphosphatase activity:GO:0017111;;serine-type endopeptidase activity:GO:0004252;;ATP-dependent proteolysis:GO:0006510;;nucleotide binding:GO:0000166;;proteolysis:GO:0006508;;ATP binding:GO:0005524;;ATP-dependent peptidase activity:GO:0004176;;endopeptidase La activity:GO:0008846	14.13 protein/peptide degradation	32.01.05 heat shock response
estExt_Genewise1.C_3_t10144	estExt_Genewise1.C_3_t10144	estExt_Genewise1.C_3_t10144	scaffold_3:139140-141622	502.855	207.308	-1.27837	0.00339949	yes	107747	IPR016040:NAD(P)-binding;;IPR006184:6-phosphogluconate-binding site;;IPR006113:6-phosphogluconate dehydrogenase, decarboxylating;;IPR008927:6-phosphogluconate dehydrogenase, C-terminal-like;;IPR006114:6-phosphogluconate dehydrogenase, C-terminal;;IPR006115:6-phosphogluconate dehydrogenase, NAD-binding;;IPR006183:6-phosphogluconate dehydrogenase	sp|P53319|6PGD2_YEAST 6-phosphogluconate dehydrogenase, decarboxylating 2 OS=Saccharomyces cerevisiae (strain ATCC 204508 / S288c) GN=GND2 PE=1 SV=1:733.406	1.1.1.44:Phosphogluconate dehydrogenase (decarboxylating).	KOG2653:6-phosphogluconate dehydrogenase	metabolic process:GO:0008152;;pentose-phosphate shunt:GO:0006098;;phosphogluconate dehydrogenase (decarboxylating) activity:GO:0004616;;catalytic activity:GO:0003824;;binding:GO:0005488;;oxidoreductase activity:GO:0016491;;NADP binding:GO:0050661	01.05 C-compound and carbohydrate metabolism	02.07 pentose-phosphate pathway	02.07.01 pentose-phosphate pathway oxidative branch B.subtilis	16.21.07 NAD/NADP binding
e_gw1.1.1142.1	e_gw1.1.1142.1	e_gw1.1.1142.1	scaffold_1:280572-282451	21.4045	8.81066	-1.28059	0.00866531	yes	67933	IPR000751:M-phase inducer phosphatase;;IPR001763:Rhodanese-like	sp|P30303|MPIP_EMENI M-phase inducer phosphatase OS=Emericella nidulans GN=nimT PE=2 SV=2:353.984	3.1.3.48:Protein-tyrosine-phosphatase.	KOG3772:M-phase inducer phosphatase	M phase of mitotic cell cycle:GO:0000087;;protein amino acid dephosphorylation:GO:0006470;;prenylated protein tyrosine phosphatase activity:GO:0004727;;protein tyrosine phosphatase activity:GO:0004725;;intracellular:GO:0005622	10.03.01.01.11 M phase	30.01.05.01 protein kinase
gw1.3.812.1	gw1.3.812.1	gw1.3.812.1	scaffold_3:764783-765699	55.82	22.9378	-1.28306	0.0093239	yes	53472	IPR001138:Fungal transcriptional regulatory protein, N-terminal	sp|Q12180|HAL9_YEAST Halotolerance protein 9 OS=Saccharomyces cerevisiae (strain ATCC 204508 / S288c) GN=HAL9 PE=1 SV=1:52.7582	-	KOG2510:SWI-SNF chromatin-remodeling complex protein	regulation of transcription, DNA-dependent:GO:0006355;;nucleus:GO:0005634;;zinc ion binding:GO:0008270;;transcription factor activity:GO:0003700
estExt_fgenesh1_pg.C_120082	estExt_fgenesh1_pg.C_120082	estExt_fgenesh1_pg.C_120082	scaffold_12:361964-364330	48.3678	19.8682	-1.28358	0.00105051	yes	141796	IPR007114:Major facilitator superfamily;;IPR011701:Major facilitator superfamily MFS-1;;IPR016196:MFS general substrate transporter;;IPR001958:Tetracycline resistance protein, TetA	sp|P25351|YCR3_YEAST Uncharacterized membrane protein YCR023C OS=Saccharomyces cerevisiae (strain ATCC 204508 / S288c) GN=YCR023C PE=1 SV=2:224.172	-	KOG2615:Permease of the major facilitator superfamily	tetracycline:hydrogen antiporter activity:GO:0015520;;transporter activity:GO:0005215;;integral to membrane:GO:0016021;;transport:GO:0006810;;response to antibiotic:GO:0046677;;tetracycline transport:GO:0015904	32.07 detoxification	20.03 transport facilities
estExt_fgenesh1_pm.C_50253	estExt_fgenesh1_pm.C_50253	estExt_fgenesh1_pm.C_50253	scaffold_5:868928-870523	116.72	47.8746	-1.28572	0.000485014	yes	136634	-	sp|O60082|YQK8_SCHPO Uncharacterized protein C1494.08c OS=Schizosaccharomyces pombe (strain ATCC 38366 / 972) GN=SPCC1494.08c PE=2 SV=1:107.457	-	-	-
fgenesh1_pm.7_#_56	fgenesh1_pm.7_#_56	fgenesh1_pm.7_#_56	scaffold_7:174619-179638	42.4927	17.4238	-1.28615	0.000371082	yes	129383	IPR017442:Serine/threonine protein kinase-related;;IPR011009:Protein kinase-like;;IPR010993:Sterile alpha motif homology;;IPR017441:Protein kinase ATP binding, conserved site;;IPR000719:Protein kinase, core;;IPR002290:Serine/threonine protein kinase;;IPR001245:Tyrosine protein kinase;;IPR008271:Serine/threonine protein kinase, active site	sp|Q10407|MKH1_SCHPO MAP kinase kinase kinase mkh1 OS=Schizosaccharomyces pombe (strain ATCC 38366 / 972) GN=mkh1 PE=2 SV=1:405.216;;sp|Q10407|MKH1_SCHPO MAP kinase kinase kinase mkh1 OS=Schizosaccharomyces pombe (strain ATCC 38366 / 972) GN=mkh1 PE=2 SV=1:65.4698	2.7.1.-:Phosphotransferases with an alcohol group as acceptor.	KOG0198:MEKK and related serine/threonine protein kinases	LPPG:FO 2-phospho-L-lactate transferase activity:GO:0043743;;(S)-lactate 2-kinase activity:GO:0043841;;cytidine kinase activity:GO:0043771;;phosphatidylinositol phosphate kinase activity:GO:0016307;;glycerate 2-kinase activity:GO:0043798;;eukaryotic elongation factor-2 kinase regulator activity:GO:0042556;;inositol tetrakisphosphate 2-kinase activity:GO:0032942;;eukaryotic elongation factor-2 kin…
e_gw1.4.38.1	e_gw1.4.38.1	e_gw1.4.38.1	scaffold_4:716115-717888	170.41	69.7892	-1.28794	0.000582891	yes	74971	IPR013027:FAD-dependent pyridine nucleotide-disulphide oxidoreductase;;IPR001327:Pyridine nucleotide-disulphide oxidoreductase, NAD-binding region	sp|O14121|NDH1_SCHPO Probable NADH-ubiquinone oxidoreductase C3A11.07, mitochondrial OS=Schizosaccharomyces pombe (strain ATCC 38366 / 972) GN=SPAC3A11.07 PE=2 SV=1:508.834	1.6.99.3:NADH dehydrogenase.	KOG2495:NADH-dehydrogenase (ubiquinone)	FAD binding:GO:0050660;;oxidoreductase activity:GO:0016491;;NADH dehydrogenase activity:GO:0003954	02.11 electron transport and membrane-associated energy conservation S.cerevisiae	02.13 respiration	02.13.03 aerobic respiration	02.16.01 alcohol fermentation	20.01.15 electron transport	42.16 mitochondrion
estExt_Genewise1Plus.C_4_t10221	estExt_Genewise1Plus.C_4_t10221	estExt_Genewise1Plus.C_4_t10221	scaffold_4:243944-246330	104.354	42.7291	-1.28819	0.000377694	yes	96783	IPR013922:Cyclin-related 2;;IPR011028:Cyclin-like	sp|O14336|MUG80_SCHPO Meiotically up-regulated gene 80 protein OS=Schizosaccharomyces pombe (strain ATCC 38366 / 972) GN=mug80 PE=1 SV=1:69.3218	-	KOG1674:Cyclin	-
estExt_Genewise1Plus.C_510048	estExt_Genewise1Plus.C_510048	estExt_Genewise1Plus.C_510048	scaffold_51:38139-39769	33.7239	13.8042	-1.28867	0.00355223	yes
estExt_fgenesh1_pg.C_140111	estExt_fgenesh1_pg.C_140111	estExt_fgenesh1_pg.C_140111	scaffold_14:422915-424890	121.72	49.7858	-1.28976	0.000395856	yes	142027	IPR000757:Glycoside hydrolase, family 16;;IPR008985:Concanavalin A-like lectin/glucanase	sp|Q8N0N3|BGBP_PENMO Beta-1,3-glucan-binding protein OS=Penaeus monodon PE=2 SV=1:195.282	-	-	hydrolase activity, hydrolyzing O-glycosyl compounds:GO:0004553;;carbohydrate metabolic process:GO:0005975	01.05.03 polysaccharide metabolism	42.01 cell wall	16.05 polysaccharide binding
gm1.1196_g	gm1.1196_g	gm1.1196_g	scaffold_2:644894-651715	22.5272	9.20906	-1.29054	0.000364147	yes	5640	IPR005480:Carbamoyl phosphate synthetase, large subunit, oligomerisation;;IPR005479:Carbamoyl phosphate synthetase, large subunit, ATP-binding;;IPR006274:Carbamoyl phosphate synthase, small subunit;;IPR016185:PreATP-grasp-like fold;;IPR002082:Aspartate carbamoyltransferase, eukaryotic;;IPR002474:Carbamoyl phosphate synthase, small subunit, N-terminal;;IPR005483:Carbamoyl phosphate synthase, large…	sp|O93937|PYR1_EMENI Protein pyrABCN OS=Emericella nidulans GN=pyrABCN PE=3 SV=2:3506.46	-	KOG0370:Multifunctional pyrimidine synthesis protein CAD (includes carbamoyl-phophate synthetase, aspartate transcarbamylase, and glutamine amidotransferase)	carboxyl- or carbamoyltransferase activity:GO:0016743;;amino acid binding:GO:0016597;;amino acid metabolic process:GO:0006520;;carbamoyl-phosphate synthase activity:GO:0004086;;'de novo' pyrimidine base biosynthetic process:GO:0006207;;aspartate carbamoyltransferase activity:GO:0004070;;ATP binding:GO:0005524;;metabolic process:GO:0008152;;hydrolase activity, acting on carbon-nitrogen (but not pe…
gm1.8589_g	gm1.8589_g	gm1.8589_g	scaffold_40:25842-27594	202.898	82.9181	-1.291	0.000492266	yes	13033	IPR009100:Acyl-CoA dehydrogenase/oxidase, middle and N-terminal;;IPR006091:Acyl-CoA dehydrogenase/oxidase, central region;;IPR001199:Cytochrome b5;;IPR009075:Acyl-CoA dehydrogenase/oxidase C-terminal;;IPR006089:Acyl-CoA dehydrogenase, conserved site;;IPR006090:Acyl-CoA oxidase/dehydrogenase, type 1	sp|Q8HXY7|ACADV_MACFA Very long-chain specific acyl-CoA dehydrogenase, mitochondrial OS=Macaca fascicularis GN=ACADVL PE=2 SV=1:125.561	1.3.99.10:Isovaleryl-CoA dehydrogenase.	KOG0137:Very-long-chain acyl-CoA dehydrogenase	metabolic process:GO:0008152;;electron transport:GO:0006118;;acyl-CoA dehydrogenase activity:GO:0003995;;oxidoreductase activity, acting on the CH-CH group of donors:GO:0016627;;transition metal ion binding:GO:0046914;;heme binding:GO:0020037;;isovaleryl-CoA dehydrogenase activity:GO:0008470	01.06 lipid, fatty acid and isoprenoid metabolism N.crassa	02.25 oxidation of fatty acids
fgenesh1_pg.2_#_32	fgenesh1_pg.2_#_32	fgenesh1_pg.2_#_32	scaffold_2:87397-88797	80.9041	33.0428	-1.29188	0.00325833	yes	32504	IPR016040:NAD(P)-binding;;IPR002347:Glucose/ribitol dehydrogenase;;IPR002198:Short-chain dehydrogenase/reductase SDR	sp|Q9P7B4|YI13_SCHPO Uncharacterized oxidoreductase C521.03 OS=Schizosaccharomyces pombe (strain ATCC 38366 / 972) GN=SPAC521.03 PE=1 SV=1:298.13	1.-.-.-:Oxidoreductases.	KOG1205:Predicted dehydrogenase	F420H2 dehydrogenase activity:GO:0043738;;metabolic process:GO:0008152;;regulation of oxidoreductase activity:GO:0051341;;catalytic activity:GO:0003824;;sulfur oxygenase reductase activity:GO:0043826;;binding:GO:0005488;;oxidoreductase activity:GO:0016491;;malolactic enzyme activity:GO:0043883	01.01.09.02 metabolism of serine	01.05 C-compound and carbohydrate metabolism	01.06 lipid, fatty acid and isoprenoid metabolism B.subtilis	16.21.07 NAD/NADP binding
e_gw1.25.129.1	e_gw1.25.129.1	e_gw1.25.129.1	scaffold_25:307953-310037	42.9074	17.522	-1.29205	0.00169038	yes
e_gw1.2.1912.1	e_gw1.2.1912.1	e_gw1.2.1912.1	scaffold_2:2100172-2101507	143.56	58.6089	-1.29246	0.00177413	yes	70273	IPR002048:Calcium-binding EF-hand	sp|P12815|PDCD6_MOUSE Programmed cell death protein 6 OS=Mus musculus GN=Pdcd6 PE=1 SV=2:158.303	-	KOG0037:Ca2+-binding protein, EF-Hand protein superfamily	calcium ion binding:GO:0005509	30.01 cellular signalling	40.10.02 apoptosis (type I programmed cell death) N.crassa	16.17.01 calcium binding
e_gw1.2.1320.1	e_gw1.2.1320.1	e_gw1.2.1320.1	scaffold_2:1181192-1182665	78.3618	31.97	-1.29343	0.00085548	yes	70417	IPR000073:Alpha/beta hydrolase fold-1	sp|O14249|CLD1_SCHPO probable cardiolipin-specific deacylase, mitochondrial OS=Schizosaccharomyces pombe (strain ATCC 38366 / 972) GN=SPAC6G10.03c PE=2 SV=1:287.73	-	KOG4409:Predicted hydrolase/acyltransferase (alpha/beta hydrolase superfamily)	-
e_gw1.25.241.1	e_gw1.25.241.1	e_gw1.25.241.1	scaffold_25:374441-376310	32.0202	13.0611	-1.29371	0.00505841	yes	89022	IPR001128:Cytochrome P450;;IPR002401:Cytochrome P450, E-class, group I	sp|Q64459|CP3AB_MOUSE Cytochrome P450 3A11 OS=Mus musculus GN=Cyp3a11 PE=1 SV=1:102.064	1.14.14.1:Unspecific monooxygenase.	KOG0158:Cytochrome P450 CYP3/CYP5/CYP6/CYP9 subfamilies	electron transport:GO:0006118;;unspecific monooxygenase activity:GO:0050381;;heme binding:GO:0020037;;monooxygenase activity:GO:0004497;;iron ion binding:GO:0005506	01.05 C-compound and carbohydrate metabolism	01.20 secondary metabolism	20.01.15 electron transport	32.05.05.01 toxins
e_gw1.2.605.1	e_gw1.2.605.1	e_gw1.2.605.1	scaffold_2:2090273-2092239	249.946	101.923	-1.29413	0.00046354	yes
estExt_Genewise1Plus.C_18_t10152	estExt_Genewise1Plus.C_18_t10152	estExt_Genewise1Plus.C_18_t10152	scaffold_18:138489-140683	99.514	40.5714	-1.29444	0.00033119	yes	102117	IPR002495:Glycosyl transferase, family 8	sp|O15488|GLYG2_HUMAN Glycogenin-2 OS=Homo sapiens GN=GYG2 PE=1 SV=2:178.333	-	KOG1950:Glycosyl transferase, family 8 - glycogenin	transferase activity, transferring hexosyl groups:GO:0016758;;carbohydrate biosynthetic process:GO:0016051	01.05.02.07 sugar, glucoside, polyol and carboxylate catabolism N.crassa
estExt_fgenesh1_pg.C_150161	estExt_fgenesh1_pg.C_150161	estExt_fgenesh1_pg.C_150161	scaffold_15:621709-623135	43.2235	17.6205	-1.29456	0.00318614	yes	142149	IPR015375:NADH pyrophosphatase-like, N-terminal;;IPR015797:NUDIX;;IPR015376:Zinc ribbon, NADH pyrophosphatase;;IPR000086:NUDIX hydrolase, core	sp|Q4R7L8|NUD12_MACFA Peroxisomal NADH pyrophosphatase NUDT12 OS=Macaca fascicularis GN=NUDT12 PE=2 SV=1:212.231	3.6.1.22:NAD+ pyrophosphatase.	KOG3084:NADH pyrophosphatase I of the Nudix family of hydrolases	hydrolase activity:GO:0016787;;NAD+ diphosphatase activity:GO:0000210	01.03 nucleotide/nucleoside/nucleobase metabolism S.cerevisiae	01.04 phosphate metabolism	01.06.06 isoprenoid metabolism	01.07 metabolism of vitamins, cofactors, and prosthetic groups S.cerevisiae	01.07.07 regulation of the metabolism of vitamins, cofactors, and prosthetic groups &nbsp;
estExt_Genewise1Plus.C_1_t60290	estExt_Genewise1Plus.C_1_t60290	estExt_Genewise1Plus.C_1_t60290	scaffold_1:3427658-3428620	35.1432	14.3113	-1.29609	0.0097584	yes	95009	IPR016040:NAD(P)-binding;;IPR008030:NmrA-like	sp|Q15GI3|IGS1_PETHY Isoeugenol synthase 1 OS=Petunia hybrida GN=IGS1 PE=1 SV=1:53.9138	-	-	metabolic process:GO:0008152;;regulation of nitrogen utilization:GO:0006808;;catalytic activity:GO:0003824;;binding:GO:0005488;;transcription repressor activity:GO:0016564	01.05 C-compound and carbohydrate metabolism
fgenesh1_pm.27_#_12	fgenesh1_pm.27_#_12	fgenesh1_pm.27_#_12	scaffold_27:52788-54616	23.8802	9.71435	-1.29763	0.00615819	yes	133808	IPR001138:Fungal transcriptional regulatory protein, N-terminal	sp|P33181|SUC1_CANAL Probable sucrose utilization protein SUC1 OS=Candida albicans GN=SUC1 PE=3 SV=2:135.576	-	-	regulation of transcription, DNA-dependent:GO:0006355;;nucleus:GO:0005634;;zinc ion binding:GO:0008270;;transcription factor activity:GO:0003700
e_gw1.32.124.1	e_gw1.32.124.1	e_gw1.32.124.1	scaffold_32:117562-122600	50.8026	20.6436	-1.29921	0.000315655	yes	91439	IPR011046:WD40 repeat-like;;IPR001680:WD40 repeat	sp|O13892|YE38_SCHPO Uncharacterized protein C20G4.08 OS=Schizosaccharomyces pombe (strain ATCC 38366 / 972) GN=SPAC20G4.08 PE=1 SV=2:55.8398	-	KOG1472:Histone acetyltransferase SAGA/ADA, catalytic subunit PCAF/GCN5 and related proteins	-
estExt_Genewise1Plus.C_5_t10280	estExt_Genewise1Plus.C_5_t10280	estExt_Genewise1Plus.C_5_t10280	scaffold_5:324878-328417	11.5369	4.68758	-1.29934	0.00610765	yes	97301	IPR006587:Vault protein inter-alpha-trypsin, metazoa;;IPR013694:Vault protein inter-alpha-trypsin;;IPR002035:von Willebrand factor, type A	sp|O00534|VMA5A_HUMAN von Willebrand factor A domain-containing protein 5A OS=Homo sapiens GN=VWA5A PE=2 SV=2:144.05	-	KOG1472:Histone acetyltransferase SAGA/ADA, catalytic subunit PCAF/GCN5 and related proteins	-
e_gw1.22.86.1	e_gw1.22.86.1	e_gw1.22.86.1	scaffold_22:398825-400016	146.682	59.5485	-1.30055	0.000865551	yes	88178	IPR002023:NADH dehydrogenase (ubiquinone), 24 kDa subunit;;IPR012336:Thioredoxin-like fold	sp|P40915|NDUV2_NEUCR NADH-ubiquinone oxidoreductase 24 kDa subunit, mitochondrial OS=Neurospora crassa GN=nuo-24 PE=2 SV=1:414.075	-	KOG3196:NADH:ubiquinone oxidoreductase, NDUFV2/24 kD subunit	NAD binding:GO:0051287;;electron transport:GO:0006118;;oxidoreductase activity:GO:0016491	02.11 electron transport and membrane-associated energy conservation N.crassa	02.11.05 accessory proteins of electron transport and membrane-associated energy conservation	02.13.03 aerobic respiration	20.01.15 electron transport	16.21.05 FAD/FMN binding	16.21.07 NAD/NADP binding	16.21.08 Fe/S binding	20.03 transport facilities
estExt_Genewise1Plus.C_5_t30025	estExt_Genewise1Plus.C_5_t30025	estExt_Genewise1Plus.C_5_t30025	scaffold_5:1359016-1359833	58.8602	23.8876	-1.30103	0.00948477	yes	97635	IPR002786:Protein of unknown function DUF84	sp|Q9KU27|Y702_VIBCH UPF0244 protein VC_0702 OS=Vibrio cholerae GN=VC_0702 PE=1 SV=1:157.147	-	-	-
estExt_Genewise1Plus.C_2_t10302	estExt_Genewise1Plus.C_2_t10302	estExt_Genewise1Plus.C_2_t10302	scaffold_2:317664-319961	66.0358	26.7236	-1.30513	0.000328054	yes	95233	IPR002931:Transglutaminase-like	sp|Q8C8H8|KY_MOUSE Kyphoscoliosis peptidase OS=Mus musculus GN=Ky PE=1 SV=1:85.5001	-	KOG3671:Actin regulatory protein (Wiskott-Aldrich syndrome protein)	-
e_gw1.4.857.1	e_gw1.4.857.1	e_gw1.4.857.1	scaffold_4:1285211-1286762	31.1068	12.5826	-1.3058	0.00583419	yes	74103	IPR017442:Serine/threonine protein kinase-related;;IPR000719:Protein kinase, core;;IPR002290:Serine/threonine protein kinase;;IPR011009:Protein kinase-like;;IPR008271:Serine/threonine protein kinase, active site;;IPR017441:Protein kinase ATP binding, conserved site;;IPR001245:Tyrosine protein kinase	sp|Q10078|PPK13_SCHPO Serine/threonine-protein kinase ppk13 OS=Schizosaccharomyces pombe (strain ATCC 38366 / 972) GN=ppk13 PE=2 SV=2:209.534	2.7.1.37:Protein kinase.	KOG2345:Serine/threonine protein kinase/TGF-beta stimulated factor	protein-tyrosine kinase activity:GO:0004713;;ATP binding:GO:0005524;;protein kinase activity:GO:0004672;;protein serine/threonine kinase activity:GO:0004674;;protein amino acid phosphorylation:GO:0006468	14.07.03 modification by phosphorylation, dephosphorylation, autophosphorylation N.crassa	16.19.03 ATP binding
estExt_Genewise1Plus.C_8_t10031	estExt_Genewise1Plus.C_8_t10031	estExt_Genewise1Plus.C_8_t10031	scaffold_8:42781-46599	14.5966	5.88996	-1.30931	0.00263312	yes	98705	IPR016024:Armadillo-type fold	sp|O74415|YJL2_SCHPO Uncharacterized protein C14G10.02 OS=Schizosaccharomyces pombe (strain ATCC 38366 / 972) GN=SPCC14G10.02 PE=4 SV=1:187.193	-	KOG1791:Uncharacterized conserved protein	binding:GO:0005488
e_gw1.11.317.1	e_gw1.11.317.1	e_gw1.11.317.1	scaffold_11:926411-930313	49.535	19.9782	-1.31002	0.000401068	yes	81881	IPR010308:Protein of unknown function DUF907, fungi	sp|O94543|YCD3_SCHPO Uncharacterized membrane protein C1322.03 OS=Schizosaccharomyces pombe (strain ATCC 38366 / 972) GN=SPCC1322.03 PE=2 SV=1:189.119	-	KOG2992:Nucleolar GTPase/ATPase p130	-
estExt_Genewise1Plus.C_8_t20018	estExt_Genewise1Plus.C_8_t20018	estExt_Genewise1Plus.C_8_t20018	scaffold_8:696358-699342	45.5334	18.3534	-1.31087	0.000391201	yes	98974	IPR001288:Initiation factor 3;;IPR004331:SPX, N-terminal;;IPR003807:Protein of unknown function DUF202	sp|Q02725|VTC3_YEAST Vacuolar transporter chaperone 3 OS=Saccharomyces cerevisiae (strain ATCC 204508 / S288c) GN=VTC3 PE=1 SV=1:450.669	-	KOG1161:Protein involved in vacuolar polyphosphate accumulation, contains SPX domain	translational initiation:GO:0006413;;translation initiation factor activity:GO:0003743	01.04 phosphate metabolism	14.04 protein targeting, sorting and translocation S.cerevisiae	20.09.13 vacuolar/lysosomal transport	42.25 vacuole or lysosome
e_gw1.12.6.1	e_gw1.12.6.1	e_gw1.12.6.1	scaffold_12:134694-136548	16.8417	6.78304	-1.31203	0.00793499	yes	82104	IPR001411:Tetracycline resistance protein, TetB;;IPR007114:Major facilitator superfamily;;IPR011701:Major facilitator superfamily MFS-1;;IPR016196:MFS general substrate transporter	sp|Q10072|YAN6_SCHPO Uncharacterized transporter C3H1.06c OS=Schizosaccharomyces pombe (strain ATCC 38366 / 972) GN=SPAC3H1.06c PE=2 SV=1:301.597	-	KOG0254:Predicted transporter (major facilitator superfamily)	tetracycline:hydrogen antiporter activity:GO:0015520;;transporter activity:GO:0005215;;integral to membrane:GO:0016021;;transport:GO:0006810;;response to antibiotic:GO:0046677;;tetracycline transport:GO:0015904	20.01.27 drug/toxin transport	20.09.16 cellular export and secretion	32.05.01 resistance proteins	32.07.05 detoxification by export
e_gw1.13.272.1	e_gw1.13.272.1	e_gw1.13.272.1	scaffold_13:444733-446182	284.938	114.716	-1.31258	0.00044888	yes	83103	IPR001841:Zinc finger, RING-type	sp|Q91XF4|RN167_MOUSE E3 ubiquitin-protein ligase RNF167 OS=Mus musculus GN=Rnf167 PE=2 SV=1:69.3218	-	KOG4628:Predicted E3 ubiquitin ligase	zinc ion binding:GO:0008270;;protein binding:GO:0005515
e_gw1.2.1149.1	e_gw1.2.1149.1	e_gw1.2.1149.1	scaffold_2:1945279-1946419	48.0515	19.3454	-1.31259	0.0033825	yes	72091	IPR006992:Amidohydrolase 2	sp|Q54LN9|ACMSD_DICDI 2-amino-3-carboxymuconate-6-semialdehyde decarboxylase OS=Dictyostelium discoideum GN=acmsd PE=3 SV=1:114.775	4.1.1.45:Aminocarboxymuconate-semialdehyde decarboxylase.	KOG4245:Predicted metal-dependent hydrolase of the TIM-barrel fold	metabolic process:GO:0008152;;catalytic activity:GO:0003824;;aminocarboxymuconate-semialdehyde decarboxylase activity:GO:0001760	01.05 C-compound and carbohydrate metabolism	01.07 metabolism of vitamins, cofactors, and prosthetic groups N.crassa
estExt_Genemark1.C_270056	estExt_Genemark1.C_270056	estExt_Genemark1.C_270056	scaffold_27:210836-213341	40.6502	16.3637	-1.31277	0.00083149	yes	26559	IPR004843:Metallophosphoesterase;;IPR006179:5'-Nucleotidase and apyrase;;IPR008334:5'-Nucleotidase, C-terminal	sp|O34313|NTPES_BACSU Trifunctional nucleotide phosphoesterase protein YfkN OS=Bacillus subtilis GN=yfkN PE=1 SV=1:82.0333;;sp|O34313|NTPES_BACSU Trifunctional nucleotide phosphoesterase protein YfkN OS=Bacillus subtilis GN=yfkN PE=1 SV=1:133.65	3.1.3.5:5'-nucleotidase.	KOG4419:5' nucleotidase	IMP-GMP specific 5'-nucleotidase activity:GO:0017175;;5'-nucleotidase activity:GO:0008253;;hydrolase activity:GO:0016787;;nucleotide catabolic process:GO:0009166	01.03 nucleotide/nucleoside/nucleobase metabolism N.crassa
estExt_fgenesh2_kg.C_90129	estExt_fgenesh2_kg.C_90129	estExt_fgenesh2_kg.C_90129	scaffold_9:847451-849355	641.393	257.76	-1.31518	0.0064363	yes	123443	-	-	-	KOG4297:C-type lectin	-
e_gw1.10.239.1	e_gw1.10.239.1	e_gw1.10.239.1	scaffold_10:894715-903736	11.3922	4.57754	-1.3154	0.00047007	yes	81091	-	sp|Q6LA55|YF49_SCHPO UPF0648 protein C3H5.09c OS=Schizosaccharomyces pombe (strain ATCC 38366 / 972) GN=SPAC3H5.09c PE=2 SV=1:78.5666;;sp|Q6LA55|YF49_SCHPO UPF0648 protein C3H5.09c OS=Schizosaccharomyces pombe (strain ATCC 38366 / 972) GN=SPAC3H5.09c PE=2 SV=1:132.109;;sp|Q6LA55|YF49_SCHPO UPF0648 protein C3H5.09c OS=Schizosaccharomyces pombe (strain ATCC 38366 / 972) GN=SPAC3H5.09c PE=2 SV=1:920…	-	KOG1910:Uncharacterized conserved protein	-
estExt_fgenesh1_pg.C_110229	estExt_fgenesh1_pg.C_110229	estExt_fgenesh1_pg.C_110229	scaffold_11:908286-910393	20.8476	8.36228	-1.31791	0.00532005	yes	141745	IPR002409:Aflatoxin biosynthesis regulatory protein;;IPR001138:Fungal transcriptional regulatory protein, N-terminal	-	-	KOG1721:FOG: Zn-finger	regulation of transcription, DNA-dependent:GO:0006355;;nucleus:GO:0005634;;zinc ion binding:GO:0008270;;transcription factor activity:GO:0003700
gm1.1349_g	gm1.1349_g	gm1.1349_g	scaffold_2:1238251-1240791	24.3035	9.72945	-1.32074	0.00404779	yes	5793	IPR003593:AAA+ ATPase, core;;IPR003439:ABC transporter-like	sp|Q66H39|ABCF3_RAT ATP-binding cassette sub-family F member 3 OS=Rattus norvegicus GN=Abcf3 PE=2 SV=1:54.6842;;sp|Q66H39|ABCF3_RAT ATP-binding cassette sub-family F member 3 OS=Rattus norvegicus GN=Abcf3 PE=2 SV=1:67.3958;;sp|Q66H39|ABCF3_RAT ATP-binding cassette sub-family F member 3 OS=Rattus norvegicus GN=Abcf3 PE=2 SV=1:248.054	-	KOG0062:ATPase component of ABC transporters with duplicated ATPase domains/Translation elongation factor EF-3b	nucleoside-triphosphatase activity:GO:0017111;;ATP binding:GO:0005524;;ATPase activity:GO:0016887;;nucleotide binding:GO:0000166	12.07 translational control	32.01.11 nutrient starvation response	16.19.03 ATP binding	18.02.01.01 enzyme activator	20.03.25 ABC transporters
estExt_fgenesh1_pg.C_1_t10411	estExt_fgenesh1_pg.C_1_t10411	estExt_fgenesh1_pg.C_1_t10411	scaffold_1:1663494-1665007	166.384	66.5461	-1.32209	0.000348475	yes	139783	IPR001754:Orotidine 5'-phosphate decarboxylase, core;;IPR011060:Ribulose-phosphate binding barrel;;IPR014732:Orotidine 5'-phosphate decarboxylase, subfamily 1, core	sp|P21594|PYRF_TRIRE Orotidine 5&apos;-phosphate decarboxylase OS=Trichoderma reesei GN=ura3 PE=3 SV=1:783.867	-	KOG1377:Uridine 5'- monophosphate synthase/orotate phosphoribosyltransferase	metabolic process:GO:0008152;;orotidine-5'-phosphate decarboxylase activity:GO:0004590;;catalytic activity:GO:0003824;;'de novo' pyrimidine base biosynthetic process:GO:0006207	01.03.04 pyrimidine nucleotide/nucleoside/nucleobase metabolism N.crassa
estExt_Genewise1.C_14_t20050	estExt_Genewise1.C_14_t20050	estExt_Genewise1.C_14_t20050	scaffold_14:707870-709401	23.0468	9.21308	-1.32281	0.00651186	yes	112877	IPR011717:Tetratricopeptide TPR-4	-	-	-	-
e_gw1.1.571.1	e_gw1.1.571.1	e_gw1.1.571.1	scaffold_1:3187234-3189139	19.113	7.63935	-1.32303	0.00648836	yes	69224	IPR000073:Alpha/beta hydrolase fold-1;;IPR002529:Fumarylacetoacetase, C-terminal-like;;IPR011234:Fumarylacetoacetase, C-terminal-related	sp|O06724|YISK_BACSU Uncharacterized protein yisK OS=Bacillus subtilis GN=yisK PE=2 SV=1:234.187	-	KOG1535:Predicted fumarylacetoacetate hydralase	metabolic process:GO:0008152;;catalytic activity:GO:0003824
estExt_Genemark1.C_1_t20246	estExt_Genemark1.C_1_t20246	estExt_Genemark1.C_1_t20246	scaffold_1:2716171-2718797	169.679	67.7136	-1.32529	0.00038582	yes	23425	IPR007219:Fungal specific transcription factor;;IPR001138:Fungal transcriptional regulatory protein, N-terminal	sp|Q9P6I9|YHDD_SCHPO Uncharacterized transcriptional regulatory protein C1683.13c OS=Schizosaccharomyces pombe (strain ATCC 38366 / 972) GN=SPBC1683.13c PE=1 SV=1:133.265	-	-	regulation of transcription, DNA-dependent:GO:0006355;;nucleus:GO:0005634;;zinc ion binding:GO:0008270;;transcription:GO:0006350;;DNA binding:GO:0003677;;transcription factor activity:GO:0003700
estExt_fgenesh1_pm.C_90091	estExt_fgenesh1_pm.C_90091	estExt_fgenesh1_pm.C_90091	scaffold_9:297102-300588	12.3567	4.92494	-1.32711	0.00461383	yes	137297	IPR007087:Zinc finger, C2H2-type;;IPR015880:Zinc finger, C2H2-like	sp|P21192|ACE2_YEAST Metallothionein expression activator OS=Saccharomyces cerevisiae (strain ATCC 204508 / S288c) GN=ACE2 PE=1 SV=1:58.5362	-	KOG1721:FOG: Zn-finger	nucleic acid binding:GO:0003676;;zinc ion binding:GO:0008270;;intracellular:GO:0005622
e_gw1.26.148.1	e_gw1.26.148.1	e_gw1.26.148.1	scaffold_26:26715-27873	61.9059	24.647	-1.32867	0.00438554	yes	89482	IPR002848:Translin	sp|P79769|TSN_CHICK Translin OS=Gallus gallus GN=TSN PE=2 SV=1:139.428	-	KOG3067:Translin family protein	sequence-specific DNA binding:GO:0043565	10.01.05.03 DNA recombination	10.03.01.01 mitotic cell cycle	10.03.03 cytokinesis (cell division) /septum formation and hydrolysis	10.03.04.05 chromosome segregation/division	10.03.05.01 spindle pole body/centrosome and microtubule cycle	16.01 protein binding	16.03.01 DNA binding	16.03.03 RNA binding
fgenesh1_pg.17_#_71	fgenesh1_pg.17_#_71	fgenesh1_pg.17_#_71	scaffold_17:296927-301333	15.9644	6.35514	-1.32886	0.00133982	yes	37395	-	-	-	KOG4246:Predicted DNA-binding protein, contains SAP domain	-
estExt_Genemark1.C_270100	estExt_Genemark1.C_270100	estExt_Genemark1.C_270100	scaffold_27:334643-336275	64.8137	25.7971	-1.32909	0.000561067	yes
estExt_fgenesh1_pg.C_90040	estExt_fgenesh1_pg.C_90040	estExt_fgenesh1_pg.C_90040	scaffold_9:119061-121632	243.819	97.0313	-1.32929	0.00136371	yes	141391	IPR007087:Zinc finger, C2H2-type;;IPR001220:Legume lectin, beta domain;;IPR015880:Zinc finger, C2H2-like	sp|P53968|CRZ1_YEAST Transcriptional regulator CRZ1 OS=Saccharomyces cerevisiae (strain ATCC 204508 / S288c) GN=CRZ1 PE=1 SV=1:188.734	-	KOG1721:FOG: Zn-finger	nucleic acid binding:GO:0003676;;zinc ion binding:GO:0008270;;sugar binding:GO:0005529;;intracellular:GO:0005622
e_gw1.2.1750.1	e_gw1.2.1750.1	e_gw1.2.1750.1	scaffold_2:154899-157939	38.0274	15.1204	-1.33054	0.0004007	yes	71660	IPR013616:Chitin synthase N-terminal;;IPR004834:Chitin synthase	sp|P30589|CHS2_NEUCR Chitin synthase 2 OS=Neurospora crassa GN=chs-2 PE=3 SV=3:1447.57	2.4.1.16:Chitin synthase.	KOG2571:Chitin synthase/hyaluronan synthase (glycosyltransferases)	chitin biosynthetic process:GO:0006031;;chitin synthase activity:GO:0004100	01.05.03 polysaccharide metabolism	10.03.03 cytokinesis (cell division) /septum formation and hydrolysis S.cerevisiae	32.01.03 osmotic and salt stress response	42.01 cell wall	43.01.03.05 budding, cell polarity and filament formation S.cerevisiae
estExt_Genewise1.C_13_t20004	estExt_Genewise1.C_13_t20004	estExt_Genewise1.C_13_t20004	scaffold_13:659268-660630	218.34	86.7609	-1.33146	0.000257226	yes	112519	IPR002189:F-actin capping protein, alpha subunit	sp|Q4I2D7|CAPZA_GIBZE F-actin-capping protein subunit alpha OS=Gibberella zeae (strain PH-1 / FGSC 9075 / NRRL 31084) GN=CAP1 PE=3 SV=1:444.506	-	KOG0836:F-actin capping protein, alpha subunit	actin cytoskeleton organization and biogenesis:GO:0030036;;actin binding:GO:0003779;;F-actin capping protein complex:GO:0008290	20.09.14.02 actin dependent transport	20.09.18.09.01 endocytosis	32.01.03 osmotic and salt stress response	34.05 cell motility	34.11.03.07 pheromone response, mating-type determination, sex-specific proteins S.cerevisiae	40.01 cell growth / morphogenesis	42.01 cell wall	42.04.03 actin cytoskeleton	43.01.03.05 budding, cell polarity and filament formation S.cerevisiae	16.01 protein binding
estExt_fgenesh1_pm.C_50175	estExt_fgenesh1_pm.C_50175	estExt_fgenesh1_pm.C_50175	scaffold_5:608783-610572	28.7304	11.3805	-1.33601	0.00744667	yes
estExt_Genewise1Plus.C_4_t20303	estExt_Genewise1Plus.C_4_t20303	estExt_Genewise1Plus.C_4_t20303	scaffold_4:963230-966302	50.4113	19.962	-1.33649	0.000213378	yes	97005	IPR011059:Metal-dependent hydrolase, composite;;IPR013108:Amidohydrolase 3	-	-	-	hydrolase activity, acting on carbon-nitrogen (but not peptide) bonds:GO:0016810
estExt_fgenesh1_pg.C_1_t20291	estExt_fgenesh1_pg.C_1_t20291	estExt_fgenesh1_pg.C_1_t20291	scaffold_1:3062246-3064484	36.642	14.478	-1.33963	0.00152015	yes	139957	IPR003042:Aromatic-ring hydroxylase;;IPR006076:FAD dependent oxidoreductase	sp|Q2GQG8|KMO_CHAGB Kynurenine 3-monooxygenase OS=Chaetomium globosum GN=BNA4 PE=3 SV=1:644.04	1.14.13.9:Kynurenine 3-monooxygenase.	KOG2614:Kynurenine 3-monooxygenase and related flavoprotein monooxygenases	metabolic process:GO:0008152;;kynurenine 3-monooxygenase activity:GO:0004502;;oxidoreductase activity:GO:0016491	01.01.09.06 metabolism of tryptophan	01.05 C-compound and carbohydrate metabolism	01.07.01 biosynthesis of vitamins, cofactors, and prosthetic groups S.cerevisiae	01.20 secondary metabolism	01.20.17 metabolism of secondary products derived from primary amino acids S.cerevisiae	01.20.33 metabolism of secondary products derived from L-tryptophan	20.01.15 electron transport	16.21.05 FAD/FMN binding	16.21.07 NAD/NADP binding
estExt_Genemark1.C_220082	estExt_Genemark1.C_220082	estExt_Genemark1.C_220082	scaffold_22:313652-317137	97.5344	38.3377	-1.34715	0.000462329	yes	26310	IPR000348:emp24/gp25L/p24;;IPR001849:Pleckstrin-like;;IPR009038:GOLD;;IPR000648:Oxysterol-binding protein	sp|P38713|OSH3_YEAST Oxysterol-binding protein homolog 3 OS=Saccharomyces cerevisiae (strain ATCC 204508 / S288c) GN=OSH3 PE=1 SV=1:439.499	-	KOG1737:Oxysterol-binding protein	integral to membrane:GO:0016021;;transport:GO:0006810;;steroid metabolic process:GO:0008202	01.06 lipid, fatty acid and isoprenoid metabolism N.crassa	01.06.06.11 tetracyclic and pentacyclic triterpenes (cholesterin, steroids and hopanoids) metabolism S.cerevisiae
fgenesh1_pm.10_#_196	fgenesh1_pm.10_#_196	fgenesh1_pm.10_#_196	scaffold_10:675265-681426	12.321	4.82984	-1.35108	0.000782	yes	130570	IPR001452:Src homology-3;;IPR016024:Armadillo-type fold;;IPR001005:SANT, DNA-binding	sp|Q8BUR4|DOCK1_MOUSE Dedicator of cytokinesis protein 1 OS=Mus musculus GN=Dock1 PE=1 SV=3:338.191	-	KOG1998:Signaling protein DOCK180	binding:GO:0005488;;DNA binding:GO:0003677	30.01 cellular signalling
estExt_Genewise1Plus.C_19_t10325	estExt_Genewise1Plus.C_19_t10325	estExt_Genewise1Plus.C_19_t10325	scaffold_19:419441-420969	147.909	57.7814	-1.35604	0.00016436	yes	102433	IPR008333:Oxidoreductase FAD-binding region;;IPR001433:Oxidoreductase FAD/NAD(P)-binding;;IPR009050:Globin-like;;IPR000971:Globin, subset	sp|Q7TTP0|HMP_BORPE Flavohemoprotein OS=Bordetella pertussis GN=hmp PE=3 SV=1:317.775	-	KOG3378:Globins and related hemoproteins	nitric oxide dioxygenase activity:GO:0008941;;electron transport:GO:0006118;;oxidoreductase activity:GO:0016491;;heme binding:GO:0020037;;iron ion binding:GO:0005506	01.02 nitrogen, sulfur and selenium metabolism N.crassa	02.13.01 anaerobic respiration	20.01.15 electron transport	32.01 stress response	32.05.01.03 chemical agent resistance
estExt_Genewise1.C_1_t20498	estExt_Genewise1.C_1_t20498	estExt_Genewise1.C_1_t20498	scaffold_1:1313685-1314839	54.1402	21.1168	-1.35831	0.00401163	yes
estExt_Genewise1Plus.C_2_t10206	estExt_Genewise1Plus.C_2_t10206	estExt_Genewise1Plus.C_2_t10206	scaffold_2:197018-198643	37.323	14.5396	-1.36008	0.00152249	yes	95198	IPR008960:Carbohydrate-binding family 9/cellobiose dehydrogenase, cytochrome;;IPR006593:Cytochrome b561 / ferric reductase transmembrane	-	-	-	carbohydrate binding:GO:0030246;;catalytic activity:GO:0003824;;carbohydrate catabolic process:GO:0016052
estExt_Genemark1.C_50340	estExt_Genemark1.C_50340	estExt_Genemark1.C_50340	scaffold_5:1338557-1340725	153.558	59.7821	-1.361	0.000205412	yes	24431	IPR015947:PUA-like;;IPR002650:ATP-sulphurylase;;IPR002891:Adenylylsulphate kinase, C-terminal	sp|Q4I1N3|MET3_GIBZE Sulfate adenylyltransferase OS=Gibberella zeae (strain PH-1 / FGSC 9075 / NRRL 31084) GN=MET3 PE=3 SV=2:993.801	2.7.7.4:Sulfate adenylyltransferase.	KOG0636:ATP sulfurylase (sulfate adenylyltransferase)	ATP binding:GO:0005524;;transferase activity, transferring phosphorus-containing groups:GO:0016772;;kinase activity:GO:0016301;;sulfate adenylyltransferase complex (ATP):GO:0009336;;sulfate assimilation:GO:0000103;;sulfate adenylyltransferase (ATP) activity:GO:0004781	01.01 amino acid metabolism	01.01.06.05 metabolism of methionine	01.02 nitrogen, sulfur and selenium metabolism N.crassa	01.02.03.01 sulfate assimilation	01.02.03.04 conjunction of sulfate	01.03.10 metabolism of cyclic and unusual nucleotides S.cerevisiae
estExt_fgenesh1_pm.C_90129	estExt_fgenesh1_pm.C_90129	estExt_fgenesh1_pm.C_90129	scaffold_9:455512-456522	203.394	79.1005	-1.36252	0.000274488	yes	137317	IPR016050:Proteasome, beta-type subunit, conserved site;;IPR001353:20S proteasome, A and B subunits	sp|P25451|PSB3_YEAST Proteasome component PUP3 OS=Saccharomyces cerevisiae (strain ATCC 204508 / S288c) GN=PUP3 PE=1 SV=1:328.176	3.4.25.1:Proteasome endopeptidase complex.	KOG0180:20S proteasome, regulatory subunit beta type PSMB3/PUP3	proteasome core complex:GO:0005839;;ubiquitin-dependent protein catabolic process:GO:0006511;;threonine endopeptidase activity:GO:0004298;;proteasome endopeptidase activity:GO:0004299	14.07.11 protein processing (proteolytic)	14.13.01.01 proteasomal degradation (ubiquitin/proteasomal pathway) N.crassa	32.01 stress response	16.01 protein binding
estExt_fgenesh1_pm.C_470015	estExt_fgenesh1_pm.C_470015	estExt_fgenesh1_pm.C_470015	scaffold_47:42395-44499	16.4634	6.40078	-1.36294	0.00578914	yes	139546	IPR000120:Amidase signature enzyme	sp|Q9URY4|YI01_SCHPO Putative amidase C869.01 OS=Schizosaccharomyces pombe (strain ATCC 38366 / 972) GN=SPAC869.01 PE=2 SV=1:305.834	-	KOG1211:Amidases	carbon-nitrogen ligase activity, with glutamine as amido-N-donor:GO:0016884
estExt_fgenesh2_kg.C_250065	estExt_fgenesh2_kg.C_250065	estExt_fgenesh2_kg.C_250065	scaffold_25:321198-322774	68.7391	26.7216	-1.36312	0.000513052	yes	124889	IPR010044:Methylthioadenosine phosphorylase;;IPR001369:Purine phosphorylase, family 2	sp|Q09816|YAC2_SCHPO Uncharacterized protein C16C9.02c OS=Schizosaccharomyces pombe (strain ATCC 38366 / 972) GN=SPAC16C9.02c PE=2 SV=1:310.457	2.4.2.28:5'-methylthioadenosine phosphorylase.	KOG3985:Methylthioadenosine phosphorylase MTAP	transferase activity, transferring pentosyl groups:GO:0016763;;S-methyl-5-thioadenosine phosphorylase activity:GO:0017061	01.01.03.02.01 biosynthesis of glutamate	01.03.01 purin nucleotide/nucleoside/nucleobase metabolism S.cerevisiae	01.04 phosphate metabolism	01.05 C-compound and carbohydrate metabolism	01.05.03 polysaccharide metabolism
e_gw1.1.1225.1	e_gw1.1.1225.1	e_gw1.1.1225.1	scaffold_1:3380874-3383314	28.3544	11.009	-1.36489	0.00161793	yes	67847	IPR007219:Fungal specific transcription factor;;IPR001138:Fungal transcriptional regulatory protein, N-terminal	sp|O94490|YC79_SCHPO Uncharacterized transcriptional regulatory protein C417.09c OS=Schizosaccharomyces pombe (strain ATCC 38366 / 972) GN=SPCC417.09c PE=2 SV=1:70.8626	-	-	regulation of transcription, DNA-dependent:GO:0006355;;nucleus:GO:0005634;;zinc ion binding:GO:0008270;;transcription:GO:0006350;;DNA binding:GO:0003677;;transcription factor activity:GO:0003700
e_gw1.6.72.1	e_gw1.6.72.1	e_gw1.6.72.1	scaffold_6:724919-726104	33.5286	12.9847	-1.36858	0.00409829	yes	76728	IPR016040:NAD(P)-binding;;IPR013154:Alcohol dehydrogenase GroES-like;;IPR002364:Quinone oxidoreductase/zeta-crystallin, conserved site;;IPR013149:Alcohol dehydrogenase, zinc-binding;;IPR011032:GroES-like	sp|O42909|YBI2_SCHPO Zinc-type alcohol dehydrogenase-like protein C16A3.02c OS=Schizosaccharomyces pombe (strain ATCC 38366 / 972) GN=SPBC16A3.02c PE=2 SV=1:98.2117	1.1.1.1:Alcohol dehydrogenase.	KOG1198:Zinc-binding oxidoreductase	alcohol dehydrogenase activity, iron-dependent:GO:0004025;;alcohol dehydrogenase activity, metal ion-independent:GO:0004023;;alcohol dehydrogenase activity:GO:0004022;;zinc ion binding:GO:0008270;;metabolic process:GO:0008152;;catalytic activity:GO:0003824;;oxidoreductase activity:GO:0016491;;binding:GO:0005488;;alcohol dehydrogenase activity, zinc-dependent:GO:0004024	20.01.15 electron transport	16.01 protein binding	16.17.09 heavy metal binding (Cu, Fe, Zn)
estExt_Genemark1.C_110124	estExt_Genemark1.C_110124	estExt_Genemark1.C_110124	scaffold_11:449467-451744	288.558	111.596	-1.37058	0.000776658	yes	25279	IPR002587:Myo-inositol-1-phosphate synthase;;IPR016040:NAD(P)-binding;;IPR013021:Myo-inositol-1-phosphate synthase, GAPDH-like	sp|Q9LW96|INO1_TOBAC Inositol-3-phosphate synthase OS=Nicotiana tabacum PE=2 SV=1:660.603	5.5.1.4:Myo-inositol-1-phosphate synthase.	KOG0693:Myo-inositol-1-phosphate synthase	inositol-3-phosphate synthase activity:GO:0004512;;metabolic process:GO:0008152;;inositol biosynthetic process:GO:0006021;;phospholipid biosynthetic process:GO:0008654;;catalytic activity:GO:0003824;;binding:GO:0005488	01.05 C-compound and carbohydrate metabolism	01.05.02.04 sugar, glucoside, polyol and carboxylate anabolism S.cerevisiae	01.20.01.01 metabolism of secondary monosaccharides S.cerevisiae	16.21.07 NAD/NADP binding
estExt_Genewise1.C_370038	estExt_Genewise1.C_370038	estExt_Genewise1.C_370038	scaffold_37:48985-51215	64.7835	25.0486	-1.3709	0.000257226	yes	116350	IPR007114:Major facilitator superfamily;;IPR011701:Major facilitator superfamily MFS-1;;IPR016196:MFS general substrate transporter	sp|Q07904|THI73_YEAST Thiamine pathway transporter THI73 OS=Saccharomyces cerevisiae (strain ATCC 204508 / S288c) GN=THI73 PE=1 SV=1:304.679	-	KOG2533:Permease of the major facilitator superfamily	transporter activity:GO:0005215;;integral to membrane:GO:0016021;;transport:GO:0006810	20.01.23 allantoin and allantoate transport	20.09.18 cellular import	20.09.18.07 non-vesicular cellular import	20.03 transport facilities
gw1.7.728.1	gw1.7.728.1	gw1.7.728.1	scaffold_7:450952-452842	86.9845	33.6191	-1.37148	0.0001732	yes	55662	IPR013027:FAD-dependent pyridine nucleotide-disulphide oxidoreductase;;IPR017046:Prenylcysteine oxidase	sp|P57681|PCYOX_ARATH Probable prenylcysteine oxidase OS=Arabidopsis thaliana GN=At5g63910 PE=2 SV=1:125.561	-	KOG2415:Electron transfer flavoprotein ubiquinone oxidoreductase	prenylcysteine oxidase activity:GO:0001735	14.07 protein modification	14.13 protein/peptide degradation
fgenesh1_pm.40_#_1	fgenesh1_pm.40_#_1	fgenesh1_pm.40_#_1	scaffold_40:1059-2317	25.427	9.81718	-1.37298	0.00970634	yes	134804	IPR016040:NAD(P)-binding;;IPR008030:NmrA-like	sp|Q5ZID0|NMRL1_CHICK NmrA-like family domain-containing protein 1 OS=Gallus gallus GN=NMRAL1 PE=2 SV=1:63.5438	-	-	metabolic process:GO:0008152;;regulation of nitrogen utilization:GO:0006808;;catalytic activity:GO:0003824;;binding:GO:0005488;;transcription repressor activity:GO:0016564
estExt_Genewise1.C_18_t10388	estExt_Genewise1.C_18_t10388	estExt_Genewise1.C_18_t10388	scaffold_18:504747-506396	34.4957	13.3116	-1.37373	0.00177279	yes	113860	IPR001412:Aminoacyl-tRNA synthetase, class I, conserved site;;IPR011059:Metal-dependent hydrolase, composite;;IPR006680:Amidohydrolase 1	sp|O14057|GUAD_SCHPO Probable guanine deaminase OS=Schizosaccharomyces pombe (strain ATCC 38366 / 972) GN=SPCC1672.03c PE=2 SV=1:333.183	3.5.4.3:Guanine deaminase.	KOG3968:Atrazine chlorohydrolase/guanine deaminase	cytoplasm:GO:0005737;;hydrolase activity:GO:0016787;;tRNA aminoacylation for protein translation:GO:0006418;;translation:GO:0006412;;aminoacyl-tRNA ligase activity:GO:0004812;;nucleotide binding:GO:0000166;;guanine deaminase activity:GO:0008892;;ATP binding:GO:0005524;;hydrolase activity, acting on carbon-nitrogen (but not peptide) bonds:GO:0016810	01.02 nitrogen, sulfur and selenium metabolism N.crassa	01.03 nucleotide/nucleoside/nucleobase metabolism	01.03.01 purin nucleotide/nucleoside/nucleobase metabolism N.crassa	16.17.09 heavy metal binding (Cu, Fe, Zn)
estExt_Genewise1.C_400087	estExt_Genewise1.C_400087	estExt_Genewise1.C_400087	scaffold_40:81318-83232	162.305	62.5893	-1.37472	0.000125673	yes	116578	IPR017442:Serine/threonine protein kinase-related;;IPR011009:Protein kinase-like;;IPR017441:Protein kinase ATP binding, conserved site;;IPR003527:MAP kinase, conserved site;;IPR000719:Protein kinase, core;;IPR008351:JNK MAP kinase;;IPR002290:Serine/threonine protein kinase;;IPR001245:Tyrosine protein kinase;;IPR008271:Serine/threonine protein kinase, active site	sp|Q92398|SPM1_SCHPO Mitogen-activated protein kinase spm1 OS=Schizosaccharomyces pombe (strain ATCC 38366 / 972) GN=spm1 PE=1 SV=1:530.406	-	KOG0660:Mitogen-activated protein kinase	protein-tyrosine kinase activity:GO:0004713;;ATP binding:GO:0005524;;protein kinase activity:GO:0004672;;MAP kinase activity:GO:0004707;;protein serine/threonine kinase activity:GO:0004674;;protein amino acid phosphorylation:GO:0006468	01.04 phosphate metabolism	01.05.02 sugar, glucoside, polyol and carboxylate metabolism	01.05.25 regulation of C-compound and carbohydrate metabolism S.cerevisiae	01.06.05 fatty acid metabolism	02.25 oxidation of fatty acids	10.03 cell cycle	10.03.01 mitotic cell cycle and cell cycle control N.crassa	10.03.01.01 mitotic cell cycle	10.03.01.02 cell cycle arrest	10.03.01.03 cell cycle checkpoints (checkpoints of morphogenesis, DNA-damage,-replication, mitotic phase and spindle)	10.03.02 meiosis	11.02.03.04 transcriptional control	14.07.03 modification by phosphorylation, dephosphorylation, autophosphorylation S.cerevisiae	30.01 cellular signalling	30.01.05 enzyme mediated signal transduction	30.01.05.01 protein kinase	30.01.05.01.02 JNK cascade	30.01.05.01.03 MAPKKK cascade	30.01.05.01.06 serine/threonine kinase	30.05 transmembrane signal transduction	30.05.01 receptor enzyme mediated signalling	30.05.01.18 transmembrane receptor protein serine/threonine kinase signalling pathways	32.01 stress response	32.01.03 osmotic and salt stress response	32.01.09 DNA damage response	34.05 cell motility	34.11.03.03 chemotaxis	34.11.03.07 pheromone response, mating-type determination, sex-specific proteins S.cerevisiae	34.11.03.13 osmosensing	40.01 cell growth / morphogenesis	40.01.03 directional cell growth (morphogenesis) S.cerevisiae	42.01 cell wall	43.01.03.05 budding, cell polarity and filament formation S.cerevisiae	43.01.03.09 development of asco- basidio- or zygospore S.cerevisiae	16.01 protein binding
estExt_Genewise1Plus.C_560011	estExt_Genewise1Plus.C_560011	estExt_Genewise1Plus.C_560011	scaffold_56:8607-9647	244.647	94.3371	-1.37481	0.000126806	yes	105286	-	-	-	KOG4157:beta-1,6-N-acetylglucosaminyltransferase, contains WSC domain	-
e_gw1.8.298.1	e_gw1.8.298.1	e_gw1.8.298.1	scaffold_8:759412-761333	65.126	25.0233	-1.37996	0.000589585	yes	79168	IPR000277:Cys/Met metabolism, pyridoxal phosphate-dependent enzyme;;IPR015424:Pyridoxal phosphate-dependent transferase, major region;;IPR006235:O-acetylhomoserine/O-acetylserine sulfhydrylase	sp|P50125|CYSD_EMENI O-acetylhomoserine (thiol)-lyase OS=Emericella nidulans GN=cysD PE=2 SV=2:716.842	-	KOG0053:Cystathionine beta-lyases/cystathionine gamma-synthases	pyridoxal phosphate binding:GO:0030170;;O-acetylhomoserine aminocarboxypropyltransferase activity:GO:0003961;;transferase activity, transferring alkyl or aryl (other than methyl) groups:GO:0016765;;amino acid metabolic process:GO:0006520	01.01 amino acid metabolism	01.01.06.05 metabolism of methionine	01.01.06.05.01 biosynthesis of methionine	01.01.06.05.01.01 biosynthesis of homocysteine	01.01.09.03.01 biosynthesis of cysteine	01.01.09.03.02 degradation of cysteine	01.02 nitrogen, sulfur and selenium metabolism S.cerevisiae	01.02.03.01 sulfate assimilation	16.21.17 pyridoxal phosphate binding
estExt_Genemark1.C_290082	estExt_Genemark1.C_290082	estExt_Genemark1.C_290082	scaffold_29:335997-338838	664.43	255.071	-1.38122	0.00700791	yes	26687	IPR004813:Oligopeptide transporter OPT superfamily;;IPR004648:Tetrapeptide transporter, OPT1/isp4	sp|P40900|ISP4_SCHPO Sexual differentiation process protein isp4 OS=Schizosaccharomyces pombe (strain ATCC 38366 / 972) GN=isp4 PE=2 SV=2:643.269	-	KOG2262:Sexual differentiation process protein ISP4	-	01.02 nitrogen, sulfur and selenium metabolism S.cerevisiae	20.01.09 peptide transport	34.11.03.07 pheromone response, mating-type determination, sex-specific proteins N.crassa	43.01.03.09 development of asco- basidio- or zygospore N.crassa	20.03 transport facilities
e_gw1.2.497.1	e_gw1.2.497.1	e_gw1.2.497.1	scaffold_2:947125-949712	33.7869	12.9595	-1.38246	0.000444367	yes	71664	IPR004813:Oligopeptide transporter OPT superfamily;;IPR004648:Tetrapeptide transporter, OPT1/isp4	sp|O14031|OPT_SCHPO Uncharacterized oligopeptide transporter C29B12.10c OS=Schizosaccharomyces pombe (strain ATCC 38366 / 972) GN=SPAC29B12.10c PE=1 SV=1:589.341	-	KOG2262:Sexual differentiation process protein ISP4	-	34.11.03.07 pheromone response, mating-type determination, sex-specific proteins N.crassa
e_gw1.2.438.1	e_gw1.2.438.1	e_gw1.2.438.1	scaffold_2:2171723-2172826	84.1863	32.2634	-1.38369	0.000844441	yes	70775	IPR002539:MaoC-like dehydratase	sp|Q01373|FOX2_NEUCR Peroxisomal hydratase-dehydrogenase-epimerase OS=Neurospora crassa GN=fox-2 PE=1 SV=1:114.39	-	KOG1206:Peroxisomal multifunctional beta-oxidation protein and related enzymes	metabolic process:GO:0008152;;oxidoreductase activity:GO:0016491	01.06 lipid, fatty acid and isoprenoid metabolism N.crassa	02.25 oxidation of fatty acids	42.01 cell wall
estExt_fgenesh2_kg.C_40003	estExt_fgenesh2_kg.C_40003	estExt_fgenesh2_kg.C_40003	scaffold_4:82602-83833	60.9023	23.3202	-1.38491	0.000980729	yes	122472	IPR001279:Beta-lactamase-like	sp|Q54EJ5|GLOB2_DICDI Glyoxylase B2 OS=Dictyostelium discoideum GN=gloB2 PE=3 SV=1:247.669	3.1.2.6:Hydroxyacylglutathione hydrolase.	KOG0814:Glyoxylase	hydrolase activity:GO:0016787;;hydroxyacylglutathione hydrolase activity:GO:0004416
fgenesh1_pm.14_#_188	fgenesh1_pm.14_#_188	fgenesh1_pm.14_#_188	scaffold_14:640615-641574	66.5936	25.4867	-1.38564	0.00317235	yes	131628	IPR016040:NAD(P)-binding;;IPR002347:Glucose/ribitol dehydrogenase;;IPR002198:Short-chain dehydrogenase/reductase SDR	sp|P40579|YIV5_YEAST Uncharacterized oxidoreductase YIR035C OS=Saccharomyces cerevisiae (strain ATCC 204508 / S288c) GN=YIR035C PE=1 SV=1:166.007	1.-.-.-:Oxidoreductases.	KOG1204:Predicted dehydrogenase	F420H2 dehydrogenase activity:GO:0043738;;metabolic process:GO:0008152;;regulation of oxidoreductase activity:GO:0051341;;catalytic activity:GO:0003824;;sulfur oxygenase reductase activity:GO:0043826;;binding:GO:0005488;;oxidoreductase activity:GO:0016491;;malolactic enzyme activity:GO:0043883	01.05 C-compound and carbohydrate metabolism	01.06 lipid, fatty acid and isoprenoid metabolism S.cerevisiae	01.06.05 fatty acid metabolism	01.07.01 biosynthesis of vitamins, cofactors, and prosthetic groups B.subtilis	16.21.07 NAD/NADP binding
estExt_Genewise1Plus.C_10_t10397	estExt_Genewise1Plus.C_10_t10397	estExt_Genewise1Plus.C_10_t10397	scaffold_10:524156-525572	976.871	373.609	-1.38664	0.00310628	yes	99701	IPR001107:Band 7 protein;;IPR001972:Stomatin	sp|Q5UP73|YR614_MIMIV Putative band 7 family protein R614 OS=Acanthamoeba polyphaga mimivirus GN=MIMI_R614 PE=3 SV=1:203.756	-	KOG2621:Prohibitins and stomatins of the PID superfamily	membrane:GO:0016020
estExt_Genewise1Plus.C_220224	estExt_Genewise1Plus.C_220224	estExt_Genewise1Plus.C_220224	scaffold_22:295560-300696	54.7827	20.9477	-1.38692	0.000134373	yes	103059	-	-	-	KOG1869:Splicing coactivator SRm160/300, subunit SRm300	-
fgenesh1_pm.27_#_119	fgenesh1_pm.27_#_119	fgenesh1_pm.27_#_119	scaffold_27:379849-381598	11.6311	4.44582	-1.38747	0.00979969	yes
estExt_Genewise1Plus.C_18_t10186	estExt_Genewise1Plus.C_18_t10186	estExt_Genewise1Plus.C_18_t10186	scaffold_18:202943-206217	157.17	59.9795	-1.38979	0.000251552	yes	102140	IPR007087:Zinc finger, C2H2-type;;IPR015880:Zinc finger, C2H2-like	sp|Q5E9U0|SP2_BOVIN Transcription factor Sp2 OS=Bos taurus GN=SP2 PE=2 SV=1:60.077	-	KOG1721:FOG: Zn-finger	nucleic acid binding:GO:0003676;;zinc ion binding:GO:0008270;;intracellular:GO:0005622
e_gw1.14.248.1	e_gw1.14.248.1	e_gw1.14.248.1	scaffold_14:98494-100962	78.2624	29.8406	-1.39104	0.00011109	yes	83535	IPR008928:Six-hairpin glycosidase-like;;IPR011613:Glycoside hydrolase 15-related	sp|Q10211|YAY3_SCHPO Uncharacterized protein C4H3.03c OS=Schizosaccharomyces pombe (strain ATCC 38366 / 972) GN=SPAC4H3.03c PE=2 SV=1:556.984	-	-	glucan 1,4-alpha-glucosidase activity:GO:0004339;;catalytic activity:GO:0003824;;polysaccharide metabolic process:GO:0005976
fgenesh1_pg.9_#_212	fgenesh1_pg.9_#_212	fgenesh1_pg.9_#_212	scaffold_9:831924-832966	36.7005	13.9873	-1.39169	0.00603521	yes	35691	IPR011333:BTB/POZ fold;;IPR000210:BTB/POZ-like;;IPR013069:BTB/POZ	-	-	-	protein binding:GO:0005515
gm1.8551_g	gm1.8551_g	gm1.8551_g	scaffold_39:20464-22831	24.8379	9.46413	-1.392	0.00321736	yes	12995	IPR008313:Uncharacterised conserved protein UCP028846;;IPR008928:Six-hairpin glycosidase-like	sp|Q10449|MU157_SCHPO Meiotically up-regulated gene 157 protein OS=Schizosaccharomyces pombe (strain ATCC 38366 / 972) GN=mug157 PE=1 SV=1:397.127	-	-	catalytic activity:GO:0003824
gw1.10.668.1	gw1.10.668.1	gw1.10.668.1	scaffold_10:278090-279825	13.3214	5.07473	-1.39234	0.00856908	yes	62627	IPR016024:Armadillo-type fold	sp|P87243|YC0I_SCHPO Uncharacterized protein C4G3.18 OS=Schizosaccharomyces pombe (strain ATCC 38366 / 972) GN=SPCC4G3.18 PE=2 SV=1:96.2857	-	-	binding:GO:0005488
estExt_Genewise1.C_10_t20279	estExt_Genewise1.C_10_t20279	estExt_Genewise1.C_10_t20279	scaffold_10:980167-982908	41.71	15.8698	-1.39411	0.000224385	yes	111521	IPR002048:Calcium-binding EF-hand;;IPR007145:MAP65/ASE1	sp|Q9HDY1|ASE1_SCHPO Anaphase spindle elongation protein 1 OS=Schizosaccharomyces pombe (strain ATCC 38366 / 972) GN=ase1 PE=1 SV=1:231.491	-	KOG4302:Microtubule-associated protein essential for anaphase spindle elongation	calcium ion binding:GO:0005509	10.03.01 mitotic cell cycle and cell cycle control N.crassa
e_gw1.11.447.1	e_gw1.11.447.1	e_gw1.11.447.1	scaffold_11:261204-263266	17.1482	6.52445	-1.39413	0.00560317	yes	81350	IPR000209:Peptidase S8 and S53, subtilisin, kexin, sedolisin	sp|P29139|ISP_PAEPO Intracellular serine protease OS=Paenibacillus polymyxa GN=isp PE=1 SV=1:65.4698	-	-	proteolysis:GO:0006508;;subtilase activity:GO:0004289
gm1.5046_g	gm1.5046_g	gm1.5046_g	scaffold_12:154589-155718	216.542	82.3082	-1.39554	0.000333515	yes
estExt_Genewise1Plus.C_15_t20027	estExt_Genewise1Plus.C_15_t20027	estExt_Genewise1Plus.C_15_t20027	scaffold_15:695060-696794	34.2846	13.0237	-1.39642	0.00145783	yes	101519	IPR000560:Histidine acid phosphatase	sp|Q9USS6|PPA4_SCHPO Probable acid phosphatase SPBC4.06 OS=Schizosaccharomyces pombe (strain ATCC 38366 / 972) GN=SPBC4.06 PE=2 SV=1:243.047	3.1.3.2:Acid phosphatase.	KOG3720:Lysosomal & prostatic acid phosphatases	acid phosphatase activity:GO:0003993	01.06 lipid, fatty acid and isoprenoid metabolism N.crassa
gm1.3647_g	gm1.3647_g	gm1.3647_g	scaffold_7:592382-595619	113.285	42.9571	-1.399	0.0001732	yes	8091	IPR001606:AT-rich interaction region	sp|O74365|SOL1_SCHPO SWI/SNF chromatin-remodeling complex subunit sol1 OS=Schizosaccharomyces pombe (strain ATCC 38366 / 972) GN=sol1 PE=1 SV=1:123.25	2.3.1.48:Histone acetyltransferase.	KOG2744:DNA-binding proteins Bright/BRCAA1/RBP1 and related proteins containing BRIGHT domain	histone acetyltransferase activity:GO:0004402;;DNA binding:GO:0003677;;intracellular:GO:0005622
estExt_Genewise1Plus.C_8_t10387	estExt_Genewise1Plus.C_8_t10387	estExt_Genewise1Plus.C_8_t10387	scaffold_8:493754-498121	30.9207	11.7025	-1.40176	0.000293532	yes
fgenesh1_pg.4_#_108	fgenesh1_pg.4_#_108	fgenesh1_pg.4_#_108	scaffold_4:376392-377355	35.5388	13.4324	-1.40368	0.00733355	yes	33761	IPR016040:NAD(P)-binding;;IPR013154:Alcohol dehydrogenase GroES-like;;IPR013149:Alcohol dehydrogenase, zinc-binding;;IPR011032:GroES-like	sp|Q9ZUC1|QORL_ARATH Quinone oxidoreductase-like protein At1g23740, chloroplastic OS=Arabidopsis thaliana GN=At1g23740 PE=1 SV=2:121.709	1.-.-.-:Oxidoreductases.	KOG1198:Zinc-binding oxidoreductase	F420H2 dehydrogenase activity:GO:0043738;;metabolic process:GO:0008152;;regulation of oxidoreductase activity:GO:0051341;;catalytic activity:GO:0003824;;sulfur oxygenase reductase activity:GO:0043826;;binding:GO:0005488;;malolactic enzyme activity:GO:0043883	01.05 C-compound and carbohydrate metabolism	02.11.07 regulation of electron transport and membrane-associated energy conservation	20.01.15 electron transport	16.17.09 heavy metal binding (Cu, Fe, Zn)	16.21.07 NAD/NADP binding
estExt_Genewise1Plus.C_4_t20373	estExt_Genewise1Plus.C_4_t20373	estExt_Genewise1Plus.C_4_t20373	scaffold_4:1055414-1056547	137.804	51.9481	-1.40747	0.000155648	yes	97043	IPR000243:Peptidase T1A, proteasome beta-subunit;;IPR016050:Proteasome, beta-type subunit, conserved site;;IPR001353:20S proteasome, A and B subunits	sp|P30656|PSB5_YEAST Proteasome component PRE2 OS=Saccharomyces cerevisiae (strain ATCC 204508 / S288c) GN=PRE2 PE=1 SV=3:389.808	3.4.25.1:Proteasome endopeptidase complex.	KOG0175:20S proteasome, regulatory subunit beta type PSMB5/PSMB8/PRE2	proteasome core complex:GO:0005839;;ubiquitin-dependent protein catabolic process:GO:0006511;;endopeptidase activity:GO:0004175;;threonine endopeptidase activity:GO:0004298;;proteasome endopeptidase activity:GO:0004299	10.03.01 mitotic cell cycle and cell cycle control S.cerevisiae	10.03.02 meiosis	14.07.11 protein processing (proteolytic)	14.13 protein/peptide degradation	14.13.01.01 proteasomal degradation (ubiquitin/proteasomal pathway) N.crassa	32.01 stress response	43.01.03.09 development of asco- basidio- or zygospore S.cerevisiae	16.01 protein binding	16.19.03 ATP binding
estExt_Genewise1Plus.C_260382	estExt_Genewise1Plus.C_260382	estExt_Genewise1Plus.C_260382	scaffold_26:420400-422153	76.9997	28.9983	-1.40888	0.000145986	yes	103705	IPR001138:Fungal transcriptional regulatory protein, N-terminal	sp|Q9P326|PRO1_NEUCR Transcriptional regulatory protein pro-1 OS=Neurospora crassa GN=pro-1 PE=2 SV=1:57.3806	-	-	regulation of transcription, DNA-dependent:GO:0006355;;nucleus:GO:0005634;;zinc ion binding:GO:0008270;;transcription factor activity:GO:0003700
e_gw1.34.124.1	e_gw1.34.124.1	e_gw1.34.124.1	scaffold_34:77509-78058	74.9018	28.207	-1.40895	0.0062943	yes	91769	IPR016181:Acyl-CoA N-acyltransferase;;IPR000182:GCN5-related N-acetyltransferase	-	-	-	metabolic process:GO:0008152;;N-acetyltransferase activity:GO:0008080
estExt_Genewise1Plus.C_9_t10403	estExt_Genewise1Plus.C_9_t10403	estExt_Genewise1Plus.C_9_t10403	scaffold_9:556996-558607	235.371	88.5599	-1.41021	7.84e-05	yes	99341	IPR001045:Spermine synthase	sp|Q9Y8H7|SPEE_NEUCR Spermidine synthase OS=Neurospora crassa GN=spe-3 PE=3 SV=1:556.214	2.5.1.16:Spermidine synthase.	KOG1562:Spermidine synthase	catalytic activity:GO:0003824;;spermidine synthase activity:GO:0004766	01.01.05.01.01 biosynthesis of polyamines	01.07.01 biosynthesis of vitamins, cofactors, and prosthetic groups S.cerevisiae	01.20.17.03 metabolism of amines	42.01 cell wall
e_gw1.7.9.1	e_gw1.7.9.1	e_gw1.7.9.1	scaffold_7:255302-259783	18.9498	7.12025	-1.41218	0.000321694	yes	78645	IPR003593:AAA+ ATPase, core;;IPR010929:CDR ABC transporter;;IPR013525:ABC-2 type transporter;;IPR003439:ABC transporter-like	sp|Q55DQ2|ABCGB_DICDI ABC transporter G family member 11 OS=Dictyostelium discoideum GN=abcG11 PE=3 SV=1:993.416	-	KOG0065:Pleiotropic drug resistance proteins (PDR1-15), ABC superfamily	nucleoside-triphosphatase activity:GO:0017111;;ATP binding:GO:0005524;;integral to membrane:GO:0016021;;transport:GO:0006810;;ATPase activity:GO:0016887;;ATPase activity, coupled to transmembrane movement of substances:GO:0042626;;nucleotide binding:GO:0000166	01.04 phosphate metabolism	01.05 C-compound and carbohydrate metabolism	20.01.01.01 cation transport (H+, Na+, K+, Ca2+ , NH4+, etc.) S.cerevisiae	20.01.03 C-compound and carbohydrate transport	20.01.13 lipid/fatty acid transport	20.01.27 drug/toxin transport	20.09.16.01 Type I protein secretion system (ABC-type transport systems) N.crassa	32.01.01 oxidative stress response	32.05.01.03 chemical agent resistance	32.07 detoxification	32.07.05 detoxification by export	34.01.01.01 homeostasis of metal ions (Na, K, Ca etc.) S.cerevisiae	16.19.03 ATP binding	20.03.22 transport ATPases	20.03.25 ABC transporters
e_gw1.43.15.1	e_gw1.43.15.1	e_gw1.43.15.1	scaffold_43:62176-63784	167.186	62.7787	-1.41311	8.51e-05	yes	92850	IPR011046:WD40 repeat-like	-	-	-	-
e_gw1.22.228.1	e_gw1.22.228.1	e_gw1.22.228.1	scaffold_22:169625-170619	66.43	24.9244	-1.41428	0.00296367	yes	88138	IPR005225:Small GTP-binding protein;;IPR002041:Ran GTPase;;IPR003578:Ras small GTPase, Rho type;;IPR003577:Ras small GTPase, Ras type;;IPR003579:Ras small GTPase, Rab type;;IPR001806:Ras GTPase;;IPR013753:Ras	sp|Q01387|RAS2_NEUCR Protein ras-2 OS=Neurospora crassa GN=ras-2 PE=3 SV=2:347.436	-	KOG0395:Ras-related GTPase	signal transduction:GO:0007165;;intracellular protein transport:GO:0006886;;protein transport:GO:0015031;;nucleocytoplasmic transport:GO:0006913;;protein binding:GO:0005515;;GTP binding:GO:0005525;;GTPase activity:GO:0003924;;small GTPase mediated signal transduction:GO:0007264;;intracellular:GO:0005622	01.03.01 purin nucleotide/nucleoside/nucleobase metabolism	01.03.13 regulation of nucleotide/nucleoside/nucleobase metabolism S.cerevisiae	01.04 phosphate metabolism	01.05.13 transfer of activated C-1 groups	01.05.25 regulation of C-compound and carbohydrate metabolism S.cerevisiae	10.03 cell cycle	10.03.01 mitotic cell cycle and cell cycle control	10.03.03 cytokinesis (cell division) /septum formation and hydrolysis S.cerevisiae	12.01 ribosome biogenesis	12.04 translation	20.09.18.09.01 endocytosis	30.01.05 enzyme mediated signal transduction	30.01.05.01 protein kinase	30.01.05.05 G-protein mediated signal transduction	30.01.05.05.01 small GTPase mediated signal transduction	30.01.09.07 cAMP/cGMP mediated signal transduction	32.01 stress response	34.11.03.03 chemotaxis	34.11.12 perception of nutrients and nutritional adaptation S.cerevisiae	40.01.03 directional cell growth (morphogenesis) N.crassa	40.01.03.01 regulation of directional cell growth	40.10 cell death	40.20 cell aging	42.01 cell wall	42.04.03 actin cytoskeleton	43.01.03 fungal and other eukaryotic cell type differentiation N.crassa	43.01.03.05 budding, cell polarity and filament formation S.cerevisiae	43.01.03.06 hyphae formation	43.01.03.09 development of asco- basidio- or zygospore N.crassa	16.01 protein binding	16.01.01 receptor binding	16.03 nucleic acid binding	16.19 nucleotide/nucleoside/nucleobase binding	16.19.05 GTP binding	18.01.07 regulation by binding / dissociation
e_gw1.1.2417.1	e_gw1.1.2417.1	e_gw1.1.2417.1	scaffold_1:254374-257405	51.9332	19.4775	-1.41485	0.00010218	yes	67874	IPR001138:Fungal transcriptional regulatory protein, N-terminal;;IPR007219:Fungal specific transcription factor	sp|P49413|UAY_EMENI Positive regulator of purine utilization OS=Emericella nidulans GN=uaY PE=4 SV=2:106.686	2.3.1.48:Histone acetyltransferase.	KOG0384:Chromodomain-helicase DNA-binding protein	regulation of transcription, DNA-dependent:GO:0006355;;nucleus:GO:0005634;;zinc ion binding:GO:0008270;;histone acetyltransferase activity:GO:0004402;;transcription:GO:0006350;;DNA binding:GO:0003677;;transcription factor activity:GO:0003700	01.03.13 regulation of nucleotide/nucleoside/nucleobase metabolism N.crassa	11.02.03.04.01 transcription activation
estExt_fgenesh1_pg.C_370029	estExt_fgenesh1_pg.C_370029	estExt_fgenesh1_pg.C_370029	scaffold_37:132337-133317	42.9682	16.1119	-1.41514	0.00322822	yes	143221	IPR003719:Phenazine biosynthesis PhzC/PhzF protein	sp|Q98KN6|Y1393_RHILO Uncharacterized isomerase mll1393 OS=Rhizobium loti GN=mll1393 PE=3 SV=1:94.7449	-	KOG3033:Predicted PhzC/PhzF-type epimerase	biosynthetic process:GO:0009058;;catalytic activity:GO:0003824	01.20 secondary metabolism
e_gw1.3.682.1	e_gw1.3.682.1	e_gw1.3.682.1	scaffold_3:1286425-1288260	29.0755	10.8803	-1.41809	0.001471	yes	72409	IPR001261:ArgE/DapE/ACY1/CPG2/YscS, conserved site;;IPR011650:Peptidase M20, dimerisation;;IPR017141:Peptidase M20, carboxypeptidase S;;IPR002933:Peptidase M20	sp|O13968|YE48_SCHPO Uncharacterized carboxypeptidase C24C9.08 OS=Schizosaccharomyces pombe (strain ATCC 38366 / 972) GN=SPAC24C9.08 PE=2 SV=1:353.599	3.4.17.4:Gly-X carboxypeptidase.	KOG2275:Aminoacylase ACY1 and related metalloexopeptidases	metallopeptidase activity:GO:0008237;;Gly-X carboxypeptidase activity:GO:0004226;;hydrolase activity:GO:0016787;;proteolysis:GO:0006508;;protein dimerization activity:GO:0046983	01.02 nitrogen, sulfur and selenium metabolism S.cerevisiae	14.07.11 protein processing (proteolytic)	14.13.01 cytoplasmic and nuclear protein degradation S.cerevisiae	14.13.04 lysosomal and vacuolar protein degradation S.cerevisiae
estExt_Genewise1Plus.C_230059	estExt_Genewise1Plus.C_230059	estExt_Genewise1Plus.C_230059	scaffold_23:72142-75945	80.6511	30.1531	-1.41939	0.000117729	yes	103180	IPR003437:Glycine cleavage system P-protein;;IPR015424:Pyridoxal phosphate-dependent transferase, major region;;IPR003439:ABC transporter-like	sp|Q09785|GCSP_SCHPO Putative glycine dehydrogenase [decarboxylating], mitochondrial OS=Schizosaccharomyces pombe (strain ATCC 38366 / 972) GN=SPAC13G6.06c PE=2 SV=1:986.867	1.4.4.2:Glycine dehydrogenase (decarboxylating).	KOG2040:Glycine dehydrogenase (decarboxylating)	glycine dehydrogenase (decarboxylating) activity:GO:0004375;;ATP binding:GO:0005524;;glycine cleavage system:GO:0004374;;glycine metabolic process:GO:0006544;;ATPase activity:GO:0016887	01.01.09.01.01 biosynthesis of glycine	01.01.09.01.02 degradation of glycine	01.01.09.02.01 biosynthesis of serine	01.01.09.02.02 degradation of serine	01.02 nitrogen, sulfur and selenium metabolism N.crassa	01.05.05.07 C-1 compound catabolism	01.07 metabolism of vitamins, cofactors, and prosthetic groups N.crassa	16.21.17 pyridoxal phosphate binding
estExt_Genewise1Plus.C_1_t20371	estExt_Genewise1Plus.C_1_t20371	estExt_Genewise1Plus.C_1_t20371	scaffold_1:1135064-1136797	182.931	68.274	-1.42189	7.03e-05	yes	94118	IPR002173:Carbohydrate/puine kinase, PfkB, conserved site;;IPR001805:Adenosine kinase;;IPR011611:Carbohydrate/purine kinase	sp|P78825|ADK_SCHPO Adenosine kinase OS=Schizosaccharomyces pombe (strain ATCC 38366 / 972) GN=ado1 PE=2 SV=2:318.546	2.7.1.20:Adenosine kinase.	KOG2854:Possible pfkB family carbohydrate kinase	purine ribonucleoside salvage:GO:0006166;;adenosine kinase activity:GO:0004001	01.03 nucleotide/nucleoside/nucleobase metabolism	01.03.01 purin nucleotide/nucleoside/nucleobase metabolism N.crassa	01.04 phosphate metabolism	16.17 metal binding	16.17.07 magnesium binding
estExt_Genemark1.C_40209	estExt_Genemark1.C_40209	estExt_Genemark1.C_40209	scaffold_4:790489-791193	44.6113	16.6449	-1.42233	0.00826476	yes
estExt_Genemark1.C_290023	estExt_Genemark1.C_290023	estExt_Genemark1.C_290023	scaffold_29:104099-105833	249.128	92.5978	-1.42784	8.61e-05	yes	26658	IPR000426:Proteasome alpha-subunit, conserved site;;IPR001353:20S proteasome, A and B subunits	sp|P32379|PSA5_YEAST Proteasome component PUP2 OS=Saccharomyces cerevisiae (strain ATCC 204508 / S288c) GN=PUP2 PE=1 SV=2:357.451	3.4.25.1:Proteasome endopeptidase complex.	KOG0176:20S proteasome, regulatory subunit alpha type PSMA5/PUP2	proteasome core complex:GO:0005839;;ubiquitin-dependent protein catabolic process:GO:0006511;;endopeptidase activity:GO:0004175;;threonine endopeptidase activity:GO:0004298;;proteasome endopeptidase activity:GO:0004299	10.03.02 meiosis	14.07.11 protein processing (proteolytic)	14.13 protein/peptide degradation	14.13.01 cytoplasmic and nuclear protein degradation T.acidophilum	14.13.01.01 proteasomal degradation (ubiquitin/proteasomal pathway) N.crassa	32.01 stress response	43.01.03.09 development of asco- basidio- or zygospore S.cerevisiae	16.01 protein binding
estExt_Genewise1Plus.C_8_t10493	estExt_Genewise1Plus.C_8_t10493	estExt_Genewise1Plus.C_8_t10493	scaffold_8:641918-644151	214.813	79.7763	-1.42905	0.000183397	yes	98965	-	-	-	KOG1187:Serine/threonine protein kinase	-	34.11.03.07 pheromone response, mating-type determination, sex-specific proteins N.crassa	43.01.03 fungal and other eukaryotic cell type differentiation N.crassa
estExt_fgenesh1_pm.C_230110	estExt_fgenesh1_pm.C_230110	estExt_fgenesh1_pm.C_230110	scaffold_23:396050-397228	82.961	30.7964	-1.42967	0.000365994	yes	138813	IPR001804:Isocitrate/isopropylmalate dehydrogenase	sp|O14104|LYS12_SCHPO Probable homoisocitrate dehydrogenase OS=Schizosaccharomyces pombe (strain ATCC 38366 / 972) GN=lys12 PE=1 SV=1:477.248	1.1.1.87:3-carboxy-2-hydroxyadipate dehydrogenase.	KOG0785:Isocitrate dehydrogenase, alpha subunit	oxidoreductase activity, acting on the CH-OH group of donors, NAD or NADP as acceptor:GO:0016616;;metabolic process:GO:0008152;;homoisocitrate dehydrogenase activity:GO:0047046	01.01.03.02.01 biosynthesis of glutamate	01.01.06.06.01.03 aminoadipic acid pathway	01.01.11 metabolism of the pyruvate family (alanine, isoleucine, leucine, valine) and D-alanine B.subtilis	01.01.11.02.01 biosynthesis of isoleucine	01.01.11.03.01 biosynthesis of valine	01.01.11.04.01 biosynthesis of leucine	01.05 C-compound and carbohydrate metabolism	01.05.02.04 sugar, glucoside, polyol and carboxylate anabolism	01.05.02.07 sugar, glucoside, polyol and carboxylate catabolism	02.01 glycolysis and gluconeogenesis	02.10 tricarboxylic-acid pathway (citrate cycle, Krebs cycle, TCA cycle) A.thaliana	20.01.15 electron transport	16.21.07 NAD/NADP binding
estExt_Genewise1Plus.C_6_t10170	estExt_Genewise1Plus.C_6_t10170	estExt_Genewise1Plus.C_6_t10170	scaffold_6:177295-178679	504.406	186.837	-1.43281	0.000175057	yes	97721	IPR002594:Glycoside hydrolase, family 12;;IPR008985:Concanavalin A-like lectin/glucanase	sp|A1CRJ0|XGEA_ASPCL Probable xyloglucan-specific endo-beta-1,4-glucanase A OS=Aspergillus clavatus (strain ATCC 1007 / CBS 513.65 / DSM 816 / NCTC 3887 / NRRL 1) GN=xgeA PE=3 SV=1:66.6254	-	-	polysaccharide catabolic process:GO:0000272;;cellulase activity:GO:0008810
estExt_fgenesh1_pm.C_100164	estExt_fgenesh1_pm.C_100164	estExt_fgenesh1_pm.C_100164	scaffold_10:575818-577245	101.65	37.5949	-1.435	0.000132079	yes	137478	IPR015424:Pyridoxal phosphate-dependent transferase, major region;;IPR000192:Aminotransferase, class V/Cysteine desulphurase	sp|P43567|AGX1_YEAST Alanine--glyoxylate aminotransferase 1 OS=Saccharomyces cerevisiae (strain ATCC 204508 / S288c) GN=AGX1 PE=1 SV=1:323.553	2.6.1.44:Alanine--glyoxylate aminotransferase.	KOG2862:Alanine-glyoxylate aminotransferase AGT1	metabolic process:GO:0008152;;alanine-glyoxylate transaminase activity:GO:0008453	01.01 amino acid metabolism	01.01.09.01.01 biosynthesis of glycine	01.01.11.01 metabolism of alanine
estExt_Genewise1Plus.C_17_t10304	estExt_Genewise1Plus.C_17_t10304	estExt_Genewise1Plus.C_17_t10304	scaffold_17:395790-397769	55.2845	20.4284	-1.4363	0.000182998	yes	101946	IPR001128:Cytochrome P450;;IPR002401:Cytochrome P450, E-class, group I	sp|P17549|CP53_ASPNG Benzoate 4-monooxygenase OS=Aspergillus niger GN=bphA PE=1 SV=1:629.017	1.14.14.1:Unspecific monooxygenase.	KOG0158:Cytochrome P450 CYP3/CYP5/CYP6/CYP9 subfamilies	electron transport:GO:0006118;;unspecific monooxygenase activity:GO:0050381;;heme binding:GO:0020037;;monooxygenase activity:GO:0004497;;iron ion binding:GO:0005506	01.01.09.04.01 biosynthesis of phenylalanine	01.01.09.04.02 degradation of phenylalanine
e_gw1.7.38.1	e_gw1.7.38.1	e_gw1.7.38.1	scaffold_7:1290944-1292136	28.9682	10.7026	-1.43651	0.00494902	yes	77750	IPR003754:Tetrapyrrole biosynthesis, uroporphyrinogen III synthase	sp|P87214|HEM4_SCHPO Uroporphyrinogen-III synthase OS=Schizosaccharomyces pombe (strain ATCC 38366 / 972) GN=ups1 PE=2 SV=1:118.242	4.2.1.75:Uroporphyrinogen-III synthase.	KOG4132:Uroporphyrinogen III synthase UROS/HEM4	tetrapyrrole biosynthetic process:GO:0033014;;uroporphyrinogen-III synthase activity:GO:0004852	01.07.01 biosynthesis of vitamins, cofactors, and prosthetic groups N.crassa	01.20.19.01 metabolism of porphyrins
estExt_Genewise1.C_3_t30457	estExt_Genewise1.C_3_t30457	estExt_Genewise1.C_3_t30457	scaffold_3:1709032-1712112	101.158	37.3131	-1.43886	7.08e-05	yes	108286	IPR006025:Peptidase M, neutral zinc metallopeptidases, zinc-binding site;;IPR014782:Peptidase M1, membrane alanine aminopeptidase, N-terminal	sp|P32454|APE2_YEAST Aminopeptidase 2, mitochondrial OS=Saccharomyces cerevisiae (strain ATCC 204508 / S288c) GN=APE2 PE=1 SV=3:959.903	-	KOG1046:Puromycin-sensitive aminopeptidase and related aminopeptidases	metallopeptidase activity:GO:0008237;;zinc ion binding:GO:0008270;;proteolysis:GO:0006508	01.01 amino acid metabolism	01.05.25 regulation of C-compound and carbohydrate metabolism S.cerevisiae	02.19 metabolism of energy reserves (e.g. glycogen, trehalose) S.cerevisiae	14.07 protein modification	14.07.11 protein processing (proteolytic)	14.13 protein/peptide degradation	14.13.01 cytoplasmic and nuclear protein degradation S.cerevisiae	16.17 metal binding	16.17.09 heavy metal binding (Cu, Fe, Zn)
e_gw1.16.556.1	e_gw1.16.556.1	e_gw1.16.556.1	scaffold_16:375869-378977	35.4472	13.0664	-1.43981	0.000181953	yes	84791	IPR007219:Fungal specific transcription factor;;IPR001138:Fungal transcriptional regulatory protein, N-terminal	sp|O59741|YN25_SCHPO Uncharacterized transcriptional regulatory protein C530.05 OS=Schizosaccharomyces pombe (strain ATCC 38366 / 972) GN=SPBC530.05 PE=2 SV=1:162.54	-	-	regulation of transcription, DNA-dependent:GO:0006355;;nucleus:GO:0005634;;zinc ion binding:GO:0008270;;transcription:GO:0006350;;DNA binding:GO:0003677;;transcription factor activity:GO:0003700	11.02.03.04.01 transcription activation
e_gw1.25.191.1	e_gw1.25.191.1	e_gw1.25.191.1	scaffold_25:57057-59145	20.7171	7.62786	-1.44147	0.00224809	yes	89214	IPR001138:Fungal transcriptional regulatory protein, N-terminal	sp|Q9UT46|MOC3_SCHPO Transcriptional regulatory protein moc3 OS=Schizosaccharomyces pombe (strain ATCC 38366 / 972) GN=moc3 PE=1 SV=3:59.3066	-	-	regulation of transcription, DNA-dependent:GO:0006355;;nucleus:GO:0005634;;zinc ion binding:GO:0008270;;transcription factor activity:GO:0003700
gm1.8550_g	gm1.8550_g	gm1.8550_g	scaffold_39:18216-19236	19.215	7.07335	-1.44177	0.00881628	yes	12994	IPR016040:NAD(P)-binding;;IPR001509:NAD-dependent epimerase/dehydratase	sp|Q59745|EXOB_RHILT UDP-glucose 4-epimerase OS=Rhizobium leguminosarum bv. trifolii GN=exoB PE=3 SV=1:66.6254	-	KOG0747:Putative NAD+-dependent epimerases	metabolic process:GO:0008152;;coenzyme binding:GO:0050662;;cellular metabolic process:GO:0044237;;catalytic activity:GO:0003824;;binding:GO:0005488
e_gw1.16.628.1	e_gw1.16.628.1	e_gw1.16.628.1	scaffold_16:185806-187060	33.5682	12.3532	-1.44222	0.00205442	yes	84543	IPR001347:Sugar isomerase (SIS)	sp|O67500|Y1546_AQUAE Uncharacterized phosphosugar isomerase aq_1546 OS=Aquifex aeolicus GN=aq_1546 PE=3 SV=1:113.62	-	-	carbohydrate metabolic process:GO:0005975;;sugar binding:GO:0005529	01.05 C-compound and carbohydrate metabolism
estExt_Genewise1.C_3_t20019	estExt_Genewise1.C_3_t20019	estExt_Genewise1.C_3_t20019	scaffold_3:610105-611561	22.2743	8.1891	-1.4436	0.00397663	yes	107938	IPR000717:Proteasome component region PCI	sp|Q7S0P8|CSN4_NEUCR COP9 signalosome complex subunit 4 OS=Neurospora crassa GN=csn-4 PE=1 SV=1:465.692	-	KOG1497:COP9 signalosome, subunit CSN4	-	14.07.03 modification by phosphorylation, dephosphorylation, autophosphorylation	14.07.07 modification by ubiquitin-related proteins	14.13.01 cytoplasmic and nuclear protein degradation A.thaliana	14.13.01.01 proteasomal degradation (ubiquitin/proteasomal pathway)	30.01.05 enzyme mediated signal transduction	41.01.03 tissue pattern formation	16.01 protein binding	18.01.01 regulation by modification	18.02.01 enzymatic activity regulation / enzyme regulator	18.02.09 regulator of transcription factor
fgenesh1_pg.9_#_211	fgenesh1_pg.9_#_211	fgenesh1_pg.9_#_211	scaffold_9:830634-831453	84.3324	30.9769	-1.44489	0.000850338	yes
estExt_Genewise1.C_8_t10121	estExt_Genewise1.C_8_t10121	estExt_Genewise1.C_8_t10121	scaffold_8:142996-145270	35.4173	12.9968	-1.44629	0.000506382	yes
estExt_Genewise1Plus.C_390082	estExt_Genewise1Plus.C_390082	estExt_Genewise1Plus.C_390082	scaffold_39:83896-88507	23.2459	8.52965	-1.44642	0.00011875	yes	104881	IPR003593:AAA+ ATPase, core;;IPR010929:CDR ABC transporter;;IPR013525:ABC-2 type transporter;;IPR003439:ABC transporter-like	sp|P41820|BFR1_SCHPO Brefeldin A resistance protein OS=Schizosaccharomyces pombe (strain ATCC 38366 / 972) GN=bfr1 PE=1 SV=1:1140.95	-	KOG0065:Pleiotropic drug resistance proteins (PDR1-15), ABC superfamily	nucleoside-triphosphatase activity:GO:0017111;;ATP binding:GO:0005524;;integral to membrane:GO:0016021;;transport:GO:0006810;;ATPase activity:GO:0016887;;ATPase activity, coupled to transmembrane movement of substances:GO:0042626;;nucleotide binding:GO:0000166	01.04 phosphate metabolism	01.05 C-compound and carbohydrate metabolism	20.01.01.01 cation transport (H+, Na+, K+, Ca2+ , NH4+, etc.) S.cerevisiae	20.01.03 C-compound and carbohydrate transport	20.01.13 lipid/fatty acid transport	20.01.27 drug/toxin transport	20.09.16.01 Type I protein secretion system (ABC-type transport systems) N.crassa	32.01.01 oxidative stress response	32.05.01.03 chemical agent resistance	32.07 detoxification	32.07.05 detoxification by export	34.01.01.01 homeostasis of metal ions (Na, K, Ca etc.) S.cerevisiae	16.19.03 ATP binding	20.03.22 transport ATPases	20.03.25 ABC transporters
e_gw1.27.288.1	e_gw1.27.288.1	e_gw1.27.288.1	scaffold_27:290091-295758	11.0573	4.05319	-1.44787	0.000908648	yes
e_gw1.12.440.1	e_gw1.12.440.1	e_gw1.12.440.1	scaffold_12:613433-618187	98.4166	36.0747	-1.44792	0.000172087	yes	82343	IPR001757:ATPase, P-type, K/Mg/Cd/Cu/Zn/Na/Ca/Na/H-transporter;;IPR005834:Haloacid dehalogenase-like hydrolase;;IPR006539:Phospholipid-translocating P-type ATPase, flippase	sp|P32660|ATC5_YEAST Phospholipid-transporting ATPase DNF1 OS=Saccharomyces cerevisiae (strain ATCC 204508 / S288c) GN=DNF1 PE=1 SV=2:1446.8	3.6.3.1:Magnesium-ATPase.	KOG0206:P-type ATPase	integral to membrane:GO:0016021;;ATPase activity, coupled to transmembrane movement of ions, phosphorylative mechanism:GO:0015662;;phospholipid transport:GO:0015914;;membrane:GO:0016020;;ATP binding:GO:0005524;;metabolic process:GO:0008152;;magnesium ion binding:GO:0000287;;phospholipid-translocating ATPase activity:GO:0004012;;catalytic activity:GO:0003824;;transport:GO:0006810	20.01.09 peptide transport	20.01.10 protein transport	20.01.13 lipid/fatty acid transport	20.03.22 transport ATPases
e_gw1.17.185.1	e_gw1.17.185.1	e_gw1.17.185.1	scaffold_17:628040-629699	32.4279	11.8855	-1.44804	0.00319764	yes	85666	IPR001585:Transaldolase	sp|Q602L8|TAL_METCA Transaldolase OS=Methylococcus capsulatus GN=tal PE=3 SV=1:94.3597	2.2.1.2:Transaldolase.	KOG2772:Transaldolase	carbohydrate metabolic process:GO:0005975;;transaldolase activity:GO:0004801
fgenesh1_pm.20_#_81	fgenesh1_pm.20_#_81	fgenesh1_pm.20_#_81	scaffold_20:271225-272755	62.7225	22.9624	-1.44971	0.00018977	yes	132828	-	sp|P40549|MNT3_YEAST Alpha-1,3-mannosyltransferase MNT3 OS=Saccharomyces cerevisiae (strain ATCC 204508 / S288c) GN=MNT3 PE=1 SV=1:87.4261	-	-	-
e_gw1.12.485.1	e_gw1.12.485.1	e_gw1.12.485.1	scaffold_12:682367-683615	147.067	53.6871	-1.45383	0.000100155	yes	81999	IPR001138:Fungal transcriptional regulatory protein, N-terminal	sp|O93870|FCR1_CANAL Fluconazole resistance protein 1 OS=Candida albicans GN=FCR1 PE=4 SV=1:77.411	-	-	regulation of transcription, DNA-dependent:GO:0006355;;nucleus:GO:0005634;;zinc ion binding:GO:0008270;;transcription factor activity:GO:0003700	11.02.03.04 transcriptional control	32.05.01.03 chemical agent resistance
gm1.4775_g	gm1.4775_g	gm1.4775_g	scaffold_11:121199-125268	116.948	42.6896	-1.4539	0.000149299	yes	9219	IPR001138:Fungal transcriptional regulatory protein, N-terminal	-	6.3.2.-:Acid--D-amino-acid ligases (peptide synthases).	KOG2510:SWI-SNF chromatin-remodeling complex protein	regulation of transcription, DNA-dependent:GO:0006355;;nucleus:GO:0005634;;coenzyme F420-0 gamma-glutamyl ligase activity:GO:0043773;;transcription factor activity:GO:0003700;;UDP-N-acetylmuramoylalanyl-D-glutamyl-2,6-diaminopimelate-D-alanyl-D-alanine ligase activity:GO:0008766;;zinc ion binding:GO:0008270;;ribosomal S6-glutamic acid ligase activity:GO:0018169;;coenzyme F420-2 alpha-glutamyl lig…
estExt_fgenesh1_pg.C_160026	estExt_fgenesh1_pg.C_160026	estExt_fgenesh1_pg.C_160026	scaffold_16:83399-84958	42.9016	15.6604	-1.45391	0.000672459	yes	142173	IPR006992:Amidohydrolase 2	-	-	-	metabolic process:GO:0008152;;catalytic activity:GO:0003824
estExt_Genewise1Plus.C_310224	estExt_Genewise1Plus.C_310224	estExt_Genewise1Plus.C_310224	scaffold_31:228911-230442	11.4982	4.19203	-1.45569	0.00837724	yes	104381	IPR001932:Protein phosphatase 2C-related;;IPR014045:Protein phosphatase 2C, N-terminal	sp|O14189|PP2C5_SCHPO Protein phosphatase 2C homolog C10F6.17c OS=Schizosaccharomyces pombe (strain ATCC 38366 / 972) GN=SPAC10F6.17c PE=2 SV=4:226.098	3.1.3.16:Serine/threonine specific protein phosphatase.	KOG0700:Protein phosphatase 2C/pyruvate dehydrogenase (lipoamide) phosphatase	myosin phosphatase complex:GO:0017023;;myosin phosphatase regulator activity:GO:0017020;;phosphoprotein phosphatase activity:GO:0004721;;calcium-dependent protein serine/threonine phosphatase activity:GO:0004723;;catalytic activity:GO:0003824;;CTD phosphatase activity:GO:0008420;;calcium-dependent protein serine/threonine phosphatase regulator activity:GO:0008597;;magnesium-dependent protein seri…	01.04 phosphate metabolism	10.03.01 mitotic cell cycle and cell cycle control N.crassa	14.07.03 modification by phosphorylation, dephosphorylation, autophosphorylation S.cerevisiae
gm1.1334_g	gm1.1334_g	gm1.1334_g	scaffold_2:1180343-1180855	139.063	50.5552	-1.45981	0.00948477	yes	5778	IPR007361:Protein of unknown function DUF427	-	-	-	-
fgenesh2_kg.2_#_203_#_gi|30121670|gb|CB907012.1|CB907012	fgenesh2_kg.2_#_203_#_gi|30121670|gb|CB907012.1|CB907012	fgenesh2_kg.2_#_203_#_gi|30121670|gb|CB907012.1|CB907012	scaffold_2:1354579-1355051	571.498	207.715	-1.46014	5.09e-05	yes
estExt_fgenesh1_pg.C_110091	estExt_fgenesh1_pg.C_110091	estExt_fgenesh1_pg.C_110091	scaffold_11:348458-350493	217.691	79.0679	-1.46112	7.31e-05	yes	141666	IPR002838:Protein of unknown function DUF124;;IPR016031:Tryptophan RNA-binding attenuator protein-like	sp|Q5XDZ5|Y233_STRP6 Uncharacterized protein M6_Spy0233 OS=Streptococcus pyogenes serotype M6 GN=M6_Spy0233 PE=1 SV=1:92.0485	-	KOG2510:SWI-SNF chromatin-remodeling complex protein	-
estExt_Genewise1Plus.C_3_t20174	estExt_Genewise1Plus.C_3_t20174	estExt_Genewise1Plus.C_3_t20174	scaffold_3:806236-807608	125.801	45.6753	-1.46166	7.55e-05	yes	96384	IPR004360:Glyoxalase/bleomycin resistance protein/dioxygenase;;IPR004361:Glyoxalase I	sp|Q09751|LGUL_SCHPO Lactoylglutathione lyase OS=Schizosaccharomyces pombe (strain ATCC 38366 / 972) GN=glo1 PE=1 SV=1:163.696;;sp|Q09751|LGUL_SCHPO Lactoylglutathione lyase OS=Schizosaccharomyces pombe (strain ATCC 38366 / 972) GN=glo1 PE=1 SV=1:318.546;;sp|Q09751|LGUL_SCHPO Lactoylglutathione lyase OS=Schizosaccharomyces pombe (strain ATCC 38366 / 972) GN=glo1 PE=1 SV=1:146.362	4.4.1.5:Lactoylglutathione lyase.	KOG2944:Glyoxalase	carbohydrate metabolic process:GO:0005975;;lactoylglutathione lyase activity:GO:0004462	01.01 amino acid metabolism	01.05 C-compound and carbohydrate metabolism	01.07 metabolism of vitamins, cofactors, and prosthetic groups S.cerevisiae	16.17.09 heavy metal binding (Cu, Fe, Zn)
fgenesh1_pm.5_#_145	fgenesh1_pm.5_#_145	fgenesh1_pm.5_#_145	scaffold_5:511779-513720	12.2003	4.42429	-1.4634	0.00734014	yes	128607	IPR011046:WD40 repeat-like;;IPR001810:Cyclin-like F-box;;IPR011044:Quinoprotein amine dehydrogenase, beta chain-like;;IPR001680:WD40 repeat	-	-	-	-
e_gw1.16.259.1	e_gw1.16.259.1	e_gw1.16.259.1	scaffold_16:385851-387458	22.5685	8.18048	-1.46406	0.00394713	yes	85067	IPR001356:Homeobox;;IPR009057:Homeodomain-like	sp|Q9FX31|HDG11_ARATH Homeobox-leucine zipper protein HDG11 OS=Arabidopsis thaliana GN=HDG11 PE=2 SV=1:66.2402	-	KOG0490:Transcription factor, contains HOX domain	regulation of transcription, DNA-dependent:GO:0006355;;nucleus:GO:0005634;;transcription factor activity:GO:0003700;;sequence-specific DNA binding:GO:0043565
estExt_Genemark1.C_120122	estExt_Genemark1.C_120122	estExt_Genemark1.C_120122	scaffold_12:482925-484320	48.3849	17.5211	-1.46546	0.000641709	yes	25418	IPR005123:2OG-Fe(II) oxygenase	sp|Q54RA4|Y3291_DICDI Probable iron/ascorbate oxidoreductase DDB_G0283291 OS=Dictyostelium discoideum GN=DDB_G0283291 PE=3 SV=1:116.316	1.14.11.9:Naringenin 3-dioxygenase.	KOG0143:Iron/ascorbate family oxidoreductases	naringenin 3-dioxygenase activity:GO:0045486	01.20 secondary metabolism
fgenesh1_pm.4_#_383	fgenesh1_pm.4_#_383	fgenesh1_pm.4_#_383	scaffold_4:1281329-1284686	54.4658	19.6991	-1.46722	3.85e-05	yes	128386	IPR011330:Glycoside hydrolase/deacetylase, beta/alpha-barrel;;IPR015341:Glycoside hydrolase, family 38, central region;;IPR000602:Glycoside hydrolase, family 38, core;;IPR011682:Glycosyl hydrolases 38, C-terminal	sp|Q9UT61|MAN1_SCHPO Alpha-mannosidase OS=Schizosaccharomyces pombe (strain ATCC 38366 / 972) GN=ams1 PE=2 SV=1:981.089	3.2.1.24:Alpha-mannosidase.	KOG4342:Alpha-mannosidase	carbohydrate metabolic process:GO:0005975;;mannosidase activity:GO:0015923;;mannose metabolic process:GO:0006013;;catalytic activity:GO:0003824;;alpha-mannosidase activity:GO:0004559	01.05.02 sugar, glucoside, polyol and carboxylate metabolism	01.05.02.07 sugar, glucoside, polyol and carboxylate catabolism S.cerevisiae	01.05.03 polysaccharide metabolism
estExt_fgenesh1_pm.C_250020	estExt_fgenesh1_pm.C_250020	estExt_fgenesh1_pm.C_250020	scaffold_25:64108-69659	52.5306	18.9944	-1.46758	6.31e-05	yes	138878	IPR016040:NAD(P)-binding;;IPR007114:Major facilitator superfamily;;IPR011701:Major facilitator superfamily MFS-1;;IPR001509:NAD-dependent epimerase/dehydratase;;IPR016196:MFS general substrate transporter	sp|O94491|YC7A_SCHPO Uncharacterized transporter C417.10 OS=Schizosaccharomyces pombe (strain ATCC 38366 / 972) GN=SPCC417.10 PE=2 SV=1:287.73	-	KOG2533:Permease of the major facilitator superfamily	metabolic process:GO:0008152;;coenzyme binding:GO:0050662;;transporter activity:GO:0005215;;integral to membrane:GO:0016021;;cellular metabolic process:GO:0044237;;catalytic activity:GO:0003824;;binding:GO:0005488;;transport:GO:0006810	20.01.23 allantoin and allantoate transport	20.09.18 cellular import	20.09.18.07 non-vesicular cellular import	20.03 transport facilities
estExt_Genewise1Plus.C_10_t10093	estExt_Genewise1Plus.C_10_t10093	estExt_Genewise1Plus.C_10_t10093	scaffold_10:104977-107106	87.6153	31.6772	-1.46774	5.27e-05	yes	99567	IPR011046:WD40 repeat-like;;IPR001810:Cyclin-like F-box;;IPR001680:WD40 repeat	sp|Q91854|TRCB_XENLA Beta-TrCP OS=Xenopus laevis GN=fbxw1 PE=2 SV=1:56.9954;;sp|Q91854|TRCB_XENLA Beta-TrCP OS=Xenopus laevis GN=fbxw1 PE=2 SV=1:230.72	-	KOG0281:Beta-TrCP (transducin repeats containing)/Slimb proteins	-	10.03.01 mitotic cell cycle and cell cycle control N.crassa	14.07.05 modification by ubiquitination, deubiquitination N.crassa	16.01 protein binding
estExt_fgenesh2_kg.C_60126	estExt_fgenesh2_kg.C_60126	estExt_fgenesh2_kg.C_60126	scaffold_6:980804-981939	38.0341	13.7447	-1.46842	0.00165302	yes	122916	IPR017853:Glycoside hydrolase, catalytic core;;IPR001223:Glycoside hydrolase, family 18, catalytic domain;;IPR001579:Glycoside hydrolase, chitinase active site	sp|P29027|CHI2_RHIOL Chitinase 2 OS=Rhizopus oligosporus GN=CHI2 PE=1 SV=1:67.781	-	-	hydrolase activity, hydrolyzing O-glycosyl compounds:GO:0004553;;carbohydrate metabolic process:GO:0005975	01.05 C-compound and carbohydrate metabolism	42.01 cell wall
e_gw1.3.216.1	e_gw1.3.216.1	e_gw1.3.216.1	scaffold_3:1443593-1444488	25.6732	9.26885	-1.4698	0.0074187	yes	72828	IPR016040:NAD(P)-binding	sp|Q9Y7K0|YGL3_SCHPO UPF0659 protein C216.03 OS=Schizosaccharomyces pombe (strain ATCC 38366 / 972) GN=SPBC216.03 PE=2 SV=1:71.2478	-	KOG1203:Predicted dehydrogenase	metabolic process:GO:0008152;;catalytic activity:GO:0003824;;binding:GO:0005488
e_gw1.4.947.1	e_gw1.4.947.1	e_gw1.4.947.1	scaffold_4:1414654-1418453	24.2011	8.73116	-1.47083	0.000141298	yes	73961	IPR003593:AAA+ ATPase, core;;IPR003959:AAA ATPase, core;;IPR003960:AAA ATPase, conserved site;;IPR015342:Peroxisome biogenesis factor 1, N-terminal;;IPR009010:Aspartate decarboxylase-like fold	sp|P46463|PEX1_PICPA Peroxisome biosynthesis protein PAS1 OS=Pichia pastoris GN=PEX1 PE=3 SV=1:559.296	3.6.1.3:Adenosinetriphosphatase.	KOG0735:AAA+-type ATPase	nucleoside-triphosphatase activity:GO:0017111;;ATPase activity, uncoupled:GO:0042624;;peroxisome organization and biogenesis:GO:0007031;;ATPase activity:GO:0016887;;binding:GO:0005488;;ATPase activity, coupled:GO:0042623;;single-stranded DNA-dependent ATP-dependent DNA helicase activity:GO:0017116;;protein-transmembrane transporting ATPase activity:GO:0015462;;protein binding:GO:0005515;;ATPase a…	42.19 peroxisome
estExt_Genewise1.C_11_t10462	estExt_Genewise1.C_11_t10462	estExt_Genewise1.C_11_t10462	scaffold_11:560321-561510	124.203	44.8086	-1.47085	8.64e-05	yes	111772	IPR010255:Haem peroxidase;;IPR002016:Haem peroxidase, plant/fungal/bacterial;;IPR002207:Plant ascorbate peroxidase	sp|Q4ING3|CCPR_GIBZE Cytochrome c peroxidase, mitochondrial OS=Gibberella zeae (strain PH-1 / FGSC 9075 / NRRL 31084) GN=CCP1 PE=3 SV=1:558.91	1.11.1.5:Cytochrome-c peroxidase.	-	response to oxidative stress:GO:0006979;;electron transport:GO:0006118;;peroxidase activity:GO:0004601;;cytochrome-c peroxidase activity:GO:0004130;;heme binding:GO:0020037	20.01.15 electron transport	32.01.01 oxidative stress response	32.07.03 detoxification by modification	32.07.07 oxygen and radical detoxification	32.07.07.05 peroxidase reaction	42.16 mitochondrion
estExt_Genewise1Plus.C_16_t10086	estExt_Genewise1Plus.C_16_t10086	estExt_Genewise1Plus.C_16_t10086	scaffold_16:89609-91623	114.981	41.474	-1.47112	3.9e-05	yes	101572	IPR003163:DNA-binding, yeast;;IPR016144:Mlu1-box-binding protein, DNA-binding	sp|P36011|STUA_EMENI Cell pattern formation-associated protein stuA OS=Emericella nidulans GN=stuA PE=2 SV=2:340.117	-	KOG2510:SWI-SNF chromatin-remodeling complex protein	regulation of transcription, DNA-dependent:GO:0006355;;transcription factor activity:GO:0003700;;DNA binding:GO:0003677	10.03.01 mitotic cell cycle and cell cycle control N.crassa	11.02.03.04 transcriptional control	43.01.03 fungal and other eukaryotic cell type differentiation N.crassa	43.01.03.09 development of asco- basidio- or zygospore N.crassa
fgenesh1_pg.36_#_16	fgenesh1_pg.36_#_16	fgenesh1_pg.36_#_16	scaffold_36:59953-61614	911.127	328.566	-1.47147	0.000397705	yes	39524	IPR015955:Lactate dehydrogenase/glycoside hydrolase, family 4, C-terminal;;IPR001236:Lactate/malate dehydrogenase;;IPR016040:NAD(P)-binding;;IPR001252:Malate dehydrogenase, active site;;IPR001557:L-lactate/malate dehydrogenase;;IPR010097:Malate dehydrogenase, NAD-dependent, eukaryotes and gamma proteobacteria	sp|P04636|MDHM_RAT Malate dehydrogenase, mitochondrial OS=Rattus norvegicus GN=Mdh2 PE=1 SV=2:327.405	1.1.1.37:Malate dehydrogenase.	KOG1494:NAD-dependent malate dehydrogenase	oxidoreductase activity, acting on the CH-OH group of donors, NAD or NADP as acceptor:GO:0016616;;carbohydrate metabolic process:GO:0005975;;cellular carbohydrate metabolic process:GO:0044262;;glycolysis:GO:0006096;;L-malate dehydrogenase activity:GO:0030060;;metabolic process:GO:0008152;;malate metabolic process:GO:0006108;;tricarboxylic acid cycle intermediate metabolic process:GO:0006100;;cata…	01.05 C-compound and carbohydrate metabolism	01.05.02.04 sugar, glucoside, polyol and carboxylate anabolism	01.05.02.07 sugar, glucoside, polyol and carboxylate catabolism	01.06 lipid, fatty acid and isoprenoid metabolism S.cerevisiae	01.06.05 fatty acid metabolism	01.07 metabolism of vitamins, cofactors, and prosthetic groups S.cerevisiae	02.01 glycolysis and gluconeogenesis	02.10 tricarboxylic-acid pathway (citrate cycle, Krebs cycle, TCA cycle) N.crassa	20.01.15 electron transport	42.16 mitochondrion	16.21.07 NAD/NADP binding
gm1.6421_g	gm1.6421_g	gm1.6421_g	scaffold_18:419490-420665	270.926	97.533	-1.47394	5.17e-05	yes	10865	IPR012336:Thioredoxin-like fold;;IPR004046:Glutathione S-transferase, C-terminal;;IPR010987:Glutathione S-transferase, C-terminal-like;;IPR004045:Glutathione S-transferase, N-terminal	sp|P77526|YFCG_ECOLI Probable disulfide bond reductase yfcG OS=Escherichia coli (strain K12) GN=yfcG PE=1 SV=1:160.229	2.5.1.18:Glutathione transferase.	KOG0867:Glutathione S-transferase	glutathione transferase activity:GO:0004364	01.02.07 regulation of nitrogen, sulfur and selenium metabolism N.crassa	01.20.37.01 metabolism of thioredoxin, glutaredoxin, glutathion N.crassa	32.07.07.03 glutathione conjugation reaction
estExt_fgenesh1_pm.C_140196	estExt_fgenesh1_pm.C_140196	estExt_fgenesh1_pm.C_140196	scaffold_14:670306-671705	51.2254	18.4312	-1.47471	0.000459686	yes
estExt_fgenesh1_pm.C_50125	estExt_fgenesh1_pm.C_50125	estExt_fgenesh1_pm.C_50125	scaffold_5:428407-430512	35.8862	12.8972	-1.47637	0.000645573	yes	136571	IPR000120:Amidase signature enzyme;;IPR015830:Amidase, fungi type	sp|O59805|YJV7_SCHPO Putative amidase C550.07 OS=Schizosaccharomyces pombe (strain ATCC 38366 / 972) GN=SPCC550.07 PE=2 SV=1:434.876	3.5.1.4:Amidase.	KOG1212:Amidases	amidase activity:GO:0004040;;carbon-nitrogen ligase activity, with glutamine as amido-N-donor:GO:0016884	01.02 nitrogen, sulfur and selenium metabolism N.crassa
fgenesh1_pg.1_#_898	fgenesh1_pg.1_#_898	fgenesh1_pg.1_#_898	scaffold_1:3378819-3379923	136.793	49.1287	-1.47736	8.47e-05	yes	32409	IPR006992:Amidohydrolase 2	sp|P80402|DBD23_ASPOR 2,3-dihydroxybenzoate decarboxylase OS=Aspergillus oryzae (strain ATCC 42149 / RIB 40) GN=AO090005000447 PE=1 SV=2:531.561	4.1.1.45:Aminocarboxymuconate-semialdehyde decarboxylase.	KOG4245:Predicted metal-dependent hydrolase of the TIM-barrel fold	metabolic process:GO:0008152;;catalytic activity:GO:0003824;;aminocarboxymuconate-semialdehyde decarboxylase activity:GO:0001760	01.05.11.07.01.03 meta-cleavage
e_gw1.1.1485.1	e_gw1.1.1485.1	e_gw1.1.1485.1	scaffold_1:2639668-2640828	82.5945	29.5423	-1.48326	0.000198344	yes	69746	IPR015797:NUDIX;;IPR000086:NUDIX hydrolase, core	sp|P91148|NDX7_CAEEL Putative nudix hydrolase 7 OS=Caenorhabditis elegans GN=ndx-7 PE=2 SV=2:65.0846	-	KOG3904:Predicted hydrolase RP2 (NUDIX/MutT superfamily)	hydrolase activity:GO:0016787
estExt_Genewise1Plus.C_290276	estExt_Genewise1Plus.C_290276	estExt_Genewise1Plus.C_290276	scaffold_29:384806-386295	178.954	64.0006	-1.48343	5.2e-05	yes	104197	IPR004827:Basic-leucine zipper (bZIP) transcription factor;;IPR011616:bZIP transcription factor, bZIP-1	sp|Q8X229|FCR3_CANAL Fluconazole resistance protein 3 OS=Candida albicans GN=FCR3 PE=3 SV=1:108.612	-	-	regulation of transcription, DNA-dependent:GO:0006355;;nucleus:GO:0005634;;transcription factor activity:GO:0003700;;protein dimerization activity:GO:0046983;;sequence-specific DNA binding:GO:0043565
gm1.891_g	gm1.891_g	gm1.891_g	scaffold_1:3191607-3192114	89.1063	31.7178	-1.49024	0.00451181	yes
estExt_Genemark1.C_770001	estExt_Genemark1.C_770001	estExt_Genemark1.C_770001	scaffold_77:340-2313	17.7399	6.31369	-1.49044	0.00244634	yes	27066	IPR000120:Amidase signature enzyme	sp|Q9URY4|YI01_SCHPO Putative amidase C869.01 OS=Schizosaccharomyces pombe (strain ATCC 38366 / 972) GN=SPAC869.01 PE=2 SV=1:305.449	-	KOG1211:Amidases	carbon-nitrogen ligase activity, with glutamine as amido-N-donor:GO:0016884
e_gw1.19.125.1	e_gw1.19.125.1	e_gw1.19.125.1	scaffold_19:33381-36160	19.4476	6.91899	-1.49096	0.000659688	yes	86548	IPR006593:Cytochrome b561 / ferric reductase transmembrane	-	-	KOG2146:Splicing coactivator SRm160/300, subunit SRm160 (contains PWI domain)	-
estExt_Genewise1Plus.C_1_t50244	estExt_Genewise1Plus.C_1_t50244	estExt_Genewise1Plus.C_1_t50244	scaffold_1:2871682-2872918	156.822	55.7144	-1.493	3e-05	yes	94780	IPR001763:Rhodanese-like	sp|Q08686|THTR_YEAST Thiosulfate sulfurtransferase TUM1 OS=Saccharomyces cerevisiae (strain ATCC 204508 / S288c) GN=TUM1 PE=1 SV=1:220.32	2.8.1.1:Thiosulfate sulfurtransferase.	KOG1529:Mercaptopyruvate sulfurtransferase/thiosulfate sulfurtransferase	thiosulfate sulfurtransferase activity:GO:0004792	01.02.02.09.05 cyanate catabolism	20.01.01.07.05 sulfate/sulfite transport	32.07.03 detoxification by modification
e_gw1.8.493.1	e_gw1.8.493.1	e_gw1.8.493.1	scaffold_8:555544-556667	82.4207	29.2673	-1.49372	0.000376991	yes	79323	IPR016040:NAD(P)-binding;;IPR002347:Glucose/ribitol dehydrogenase;;IPR002198:Short-chain dehydrogenase/reductase SDR	sp|Q9X248|FABG_THEMA 3-oxoacyl-[acyl-carrier-protein] reductase FabG OS=Thermotoga maritima GN=fabG PE=3 SV=1:169.088	1.1.1.100:3-oxoacyl-[acyl-carrier protein] reductase.	KOG0725:Reductases with broad range of substrate specificities	metabolic process:GO:0008152;;3-oxoacyl-[acyl-carrier-protein] reductase activity:GO:0004316;;catalytic activity:GO:0003824;;binding:GO:0005488;;oxidoreductase activity:GO:0016491	01.05 C-compound and carbohydrate metabolism	01.20 secondary metabolism
estExt_fgenesh1_pg.C_190040	estExt_fgenesh1_pg.C_190040	estExt_fgenesh1_pg.C_190040	scaffold_19:160013-161908	634.895	225.055	-1.49624	0.000926258	yes	142425	IPR016040:NAD(P)-binding;;IPR015878:S-adenosyl-L-homocysteine hydrolase, NAD binding;;IPR000043:S-adenosyl-L-homocysteine hydrolase	sp|P83783|SAHH_CANAL Adenosylhomocysteinase OS=Candida albicans GN=SAH1 PE=1 SV=2:760.37	3.3.1.1:Adenosylhomocysteinase.	KOG1370:S-adenosylhomocysteine hydrolase	metabolic process:GO:0008152;;catalytic activity:GO:0003824;;one-carbon compound metabolic process:GO:0006730;;adenosylhomocysteinase activity:GO:0004013;;binding:GO:0005488	01.01 amino acid metabolism	01.01.06 metabolism of the aspartate family	01.01.06.05 metabolism of methionine	01.05.05.04 C-1 compound anabolism	01.05.05.07 C-1 compound catabolism	01.05.13.01 S-adenosyl-methionine - homocysteine cycle S.cerevisiae	01.07.01 biosynthesis of vitamins, cofactors, and prosthetic groups N.crassa	16.01 protein binding	16.17.09 heavy metal binding (Cu, Fe, Zn)	16.21.07 NAD/NADP binding
gm1.2857_g	gm1.2857_g	gm1.2857_g	scaffold_5:651290-653687	19.5785	6.93475	-1.49735	0.00116015	yes	7301	IPR007219:Fungal specific transcription factor;;IPR001138:Fungal transcriptional regulatory protein, N-terminal	-	-	-	regulation of transcription, DNA-dependent:GO:0006355;;nucleus:GO:0005634;;zinc ion binding:GO:0008270;;transcription:GO:0006350;;DNA binding:GO:0003677;;transcription factor activity:GO:0003700
fgenesh1_pg.4_#_320	fgenesh1_pg.4_#_320	fgenesh1_pg.4_#_320	scaffold_4:1178524-1180422	17.3997	6.15731	-1.49869	0.00217229	yes
estExt_Genewise1Plus.C_19_t10255	estExt_Genewise1Plus.C_19_t10255	estExt_Genewise1Plus.C_19_t10255	scaffold_19:316765-317896	401.52	141.667	-1.50297	4.42e-05	yes	102402	IPR000425:Major intrinsic protein	sp|P47862|AQP3_RAT Aquaporin-3 OS=Rattus norvegicus GN=Aqp3 PE=2 SV=1:105.145	-	KOG0224:Aquaporin (major intrinsic protein family)	transporter activity:GO:0005215;;transport:GO:0006810;;membrane:GO:0016020
estExt_Genewise1Plus.C_7_t20161	estExt_Genewise1Plus.C_7_t20161	estExt_Genewise1Plus.C_7_t20161	scaffold_7:822494-824456	34.3991	12.129	-1.50391	0.000836781	yes	98410	IPR005828:General substrate transporter;;IPR007114:Major facilitator superfamily;;IPR004738:Phosphate permease;;IPR016196:MFS general substrate transporter;;IPR005829:Sugar transporter, conserved site	sp|P25297|PHO84_YEAST Inorganic phosphate transporter PHO84 OS=Saccharomyces cerevisiae (strain ATCC 204508 / S288c) GN=PHO84 PE=1 SV=2:594.349	-	KOG0252:Inorganic phosphate transporter	phosphate transport:GO:0006817;;transporter activity:GO:0005215;;inorganic phosphate transmembrane transporter activity:GO:0005315;;integral to membrane:GO:0016021;;transport:GO:0006810;;membrane:GO:0016020	01.04 phosphate metabolism	20.01.01.01.01 heavy metal ion transport (Cu+, Fe3+, etc.) S.cerevisiae	20.01.01.07 anion transport	20.01.01.07.07 phosphate transport	20.01.03 C-compound and carbohydrate transport	20.09.18 cellular import	34.01.01.03 homeostasis of protons	34.01.03.03 homeostasis of phosphate	20.03 transport facilities
e_gw1.43.43.1	e_gw1.43.43.1	e_gw1.43.43.1	scaffold_43:55101-56345	105.825	37.3057	-1.50421	7.86e-05	yes	92897	IPR008220:Homoserine acetyltransferase	sp|O27848|METX_METTH Putative homoserine O-acetyltransferase OS=Methanobacterium thermoautotrophicum (strain Delta H) GN=MTH_1820 PE=3 SV=1:90.1225	-	-	cytoplasm:GO:0005737;;O-acetyltransferase activity:GO:0016413
gm1.6389_g	gm1.6389_g	gm1.6389_g	scaffold_18:247524-248474	72.5652	25.5762	-1.50447	0.000597865	yes	10833	IPR016040:NAD(P)-binding;;IPR002347:Glucose/ribitol dehydrogenase;;IPR002198:Short-chain dehydrogenase/reductase SDR	sp|Q9RPT1|RHLG_PSEAE Rhamnolipids biosynthesis 3-oxoacyl-[acyl-carrier-protein] reductase OS=Pseudomonas aeruginosa GN=rhlG PE=1 SV=1:179.104	1.1.1.100:3-oxoacyl-[acyl-carrier protein] reductase.	KOG0725:Reductases with broad range of substrate specificities	metabolic process:GO:0008152;;3-oxoacyl-[acyl-carrier-protein] reductase activity:GO:0004316;;catalytic activity:GO:0003824;;binding:GO:0005488;;oxidoreductase activity:GO:0016491	01.05 C-compound and carbohydrate metabolism	01.06.02.02 glycolipid metabolism	01.06.05 fatty acid metabolism	01.20.01.05 metabolism of sugar alcohols	01.20.35.01.01 metabolism of melanins
fgenesh1_pm.10_#_4	fgenesh1_pm.10_#_4	fgenesh1_pm.10_#_4	scaffold_10:6639-7923	83.0458	29.2535	-1.5053	8.87e-05	yes	130378	IPR007913:Protein of unknown function UPF0187	sp|Q8YSU5|Y2987_NOSS1 UPF0187 protein alr2987 OS=Nostoc sp. (strain PCC 7120 / UTEX 2576) GN=alr2987 PE=3 SV=1:137.887	-	-	-
gm1.986_g	gm1.986_g	gm1.986_g	scaffold_1:3489606-3490198	39.6915	13.9689	-1.50661	0.00916755	yes	5430	IPR016181:Acyl-CoA N-acyltransferase;;IPR000182:GCN5-related N-acetyltransferase	sp|O93806|GNA1_CANAL Glucosamine 6-phosphate N-acetyltransferase OS=Candida albicans GN=GNA1 PE=3 SV=1:121.709	2.3.1.4:Glucosamine-phosphate N-acetyltransferase.	KOG3396:Glucosamine-phosphate N-acetyltransferase	metabolic process:GO:0008152;;glucosamine 6-phosphate N-acetyltransferase activity:GO:0004343;;N-acetyltransferase activity:GO:0008080	01.03.04 pyrimidine nucleotide/nucleoside/nucleobase metabolism S.cerevisiae	01.05 C-compound and carbohydrate metabolism	01.05.09 aminosaccharide metabolism	01.05.09.04 aminosaccharide anabolism	01.05.09.07 aminosaccharide catabolism	01.06 lipid, fatty acid and isoprenoid metabolism	01.07 metabolism of vitamins, cofactors, and prosthetic groups	01.20.01 metabolism of primary metabolic sugar derivatives A.thaliana	10.03.01 mitotic cell cycle and cell cycle control S.cerevisiae	14.07 protein modification	42.01 cell wall
estExt_Genewise1Plus.C_16_t10182	estExt_Genewise1Plus.C_16_t10182	estExt_Genewise1Plus.C_16_t10182	scaffold_16:223789-225802	63.205	22.2382	-1.507	5.04e-05	yes	101618	IPR016161:Aldehyde/histidinol dehydrogenase;;IPR012394:Aldehyde dehydrogenase NAD(P)-dependent;;IPR015590:Aldehyde dehydrogenase	sp|Q5RF60|AL3A2_PONAB Fatty aldehyde dehydrogenase OS=Pongo abelii GN=ALDH3A2 PE=2 SV=1:331.257	1.2.1.5:Aldehyde dehydrogenase (NAD(P)+).	KOG2456:Aldehyde dehydrogenase	metabolic process:GO:0008152;;aldehyde metabolic process:GO:0006081;;oxidoreductase activity:GO:0016491;;aldehyde dehydrogenase [NAD(P)+] activity:GO:0004030	01.05 C-compound and carbohydrate metabolism	01.05.02.07 sugar, glucoside, polyol and carboxylate catabolism B.subtilis	01.06 lipid, fatty acid and isoprenoid metabolism	01.06.06 isoprenoid metabolism	01.07 metabolism of vitamins, cofactors, and prosthetic groups	02.01 glycolysis and gluconeogenesis	20.01.15 electron transport	32.01.13 electromagnetic waves stress response (e.g. UV, X-ray)	32.07 detoxification	32.07.09 detoxification by degradation	16.21.07 NAD/NADP binding
fgenesh1_pg.19_#_46	fgenesh1_pg.19_#_46	fgenesh1_pg.19_#_46	scaffold_19:173185-176011	63.7228	22.4039	-1.50806	2.08e-05	yes	37721	-	sp|P32334|MSB2_YEAST Protein MSB2 OS=Saccharomyces cerevisiae (strain ATCC 204508 / S288c) GN=MSB2 PE=1 SV=1:63.929	3.2.1.18:Exo-alpha-sialidase.	KOG4701:Chitinase	exo-alpha-sialidase activity:GO:0004308
estExt_fgenesh1_pm.C_40361	estExt_fgenesh1_pm.C_40361	estExt_fgenesh1_pm.C_40361	scaffold_4:1196868-1198790	48.1339	16.9154	-1.50872	0.000158482	yes	136493	IPR007087:Zinc finger, C2H2-type;;IPR015880:Zinc finger, C2H2-like	sp|P39959|YEW0_YEAST Zinc finger protein YER130C OS=Saccharomyces cerevisiae (strain ATCC 204508 / S288c) GN=YER130C PE=2 SV=2:103.219	-	KOG1721:FOG: Zn-finger	nucleic acid binding:GO:0003676;;zinc ion binding:GO:0008270;;intracellular:GO:0005622	11.02.03.04 transcriptional control
estExt_Genewise1Plus.C_2_t30486	estExt_Genewise1Plus.C_2_t30486	estExt_Genewise1Plus.C_2_t30486	scaffold_2:1867993-1871214	49.6867	17.4208	-1.51205	2.94e-05	yes	95812	IPR000559:Formate-tetrahydrofolate ligase, FTHFS;;IPR016040:NAD(P)-binding;;IPR000672:Tetrahydrofolate dehydrogenase/cyclohydrolase	sp|P09440|C1TM_YEAST C-1-tetrahydrofolate synthase, mitochondrial OS=Saccharomyces cerevisiae (strain ATCC 204508 / S288c) GN=MIS1 PE=1 SV=1:1206.82	-	KOG4230:C1-tetrahydrofolate synthase	formate-tetrahydrofolate ligase activity:GO:0004329;;metabolic process:GO:0008152;;ATP binding:GO:0005524;;catalytic activity:GO:0003824;;folic acid and derivative biosynthetic process:GO:0009396;;binding:GO:0005488	01.01 amino acid metabolism	01.03.01 purin nucleotide/nucleoside/nucleobase metabolism N.crassa	01.03.01.03 purine nucleotide/nucleoside/nucleobase anabolism S.cerevisiae	01.05.05.04 C-1 compound anabolism	01.05.05.07 C-1 compound catabolism	01.05.06.07 C-2 compound and organic acid catabolism S.cerevisiae	01.05.09.07 aminosaccharide catabolism	01.05.13.03 tetrahydrofolate-dependent C-1-transfer S.cerevisiae	01.07.01 biosynthesis of vitamins, cofactors, and prosthetic groups N.crassa	11.06.02 tRNA modification	16.19.03 ATP binding	16.21.07 NAD/NADP binding
gm1.1868_g	gm1.1868_g	gm1.1868_g	scaffold_3:540306-541338	33.1164	11.6068	-1.51258	0.00203994	yes	6312	IPR008262:Lipase, active site;;IPR000073:Alpha/beta hydrolase fold-1;;IPR003089:Alpha/beta hydrolase;;IPR000639:Epoxide hydrolase-like	sp|Q2VLB9|BPHD_BURCE 2-hydroxy-6-oxo-6-phenylhexa-2,4-dienoate hydrolase OS=Burkholderia cepacia GN=bphD PE=3 SV=1:88.5817	-	KOG4178:Soluble epoxide hydrolase	hydrolase activity:GO:0016787;;catalytic activity:GO:0003824	01.05.11.07.01 aerobic aromate catabolism	01.20 secondary metabolism
estExt_fgenesh1_pg.C_110155	estExt_fgenesh1_pg.C_110155	estExt_fgenesh1_pg.C_110155	scaffold_11:590494-592463	144.348	50.5125	-1.51484	3.88e-05	yes	141702	IPR017853:Glycoside hydrolase, catalytic core	sp|Q4WC60|BTGE_ASPFU Probable beta-glucosidase btgE OS=Neosartorya fumigata (strain ATCC MYA-4609 / Af293 / CBS 101355 / FGSC A1100) GN=btgE PE=3 SV=2:397.897	3.2.1.58:Glucan 1,3-beta-glucosidase.	KOG1216:von Willebrand factor and related coagulation proteins	glucan 1,3-beta-glucosidase activity:GO:0004338	01.05.03 polysaccharide metabolism	42.01 cell wall
e_gw1.37.50.1	e_gw1.37.50.1	e_gw1.37.50.1	scaffold_37:112025-114006	38.0993	13.3243	-1.5157	0.000272911	yes	92119	IPR001466:Beta-lactamase;;IPR012338:Beta-lactamase-type transpeptidase fold	sp|Q8NUZ4|FLP_STAAW Protein flp OS=Staphylococcus aureus (strain MW2) GN=flp PE=3 SV=1:63.1586	-	-	beta-lactamase activity:GO:0008800;;response to antibiotic:GO:0046677;;beta-lactam antibiotic catabolic process:GO:0030655
e_gw1.41.34.1	e_gw1.41.34.1	e_gw1.41.34.1	scaffold_41:21226-22021	32.0288	11.1756	-1.51901	0.00398766	yes	92619	IPR007396:Negative transcriptional regulator	sp|Q4WVZ0|YA800_ASPFU Uncharacterized protein AFUA_5G13800 OS=Neosartorya fumigata (strain ATCC MYA-4609 / Af293 / CBS 101355 / FGSC A1100) GN=AFUA_5G13800 PE=3 SV=1:305.834	-	-	-
estExt_fgenesh1_pg.C_50190	estExt_fgenesh1_pg.C_50190	estExt_fgenesh1_pg.C_50190	scaffold_5:694285-697474	344.215	120.083	-1.51928	0.000472931	yes	140798	IPR001138:Fungal transcriptional regulatory protein, N-terminal	-	3.2.1.18:Exo-alpha-sialidase.	KOG3599:Ca2+-modulated nonselective cation channel polycystin	regulation of transcription, DNA-dependent:GO:0006355;;nucleus:GO:0005634;;zinc ion binding:GO:0008270;;exo-alpha-sialidase activity:GO:0004308;;transcription factor activity:GO:0003700
gm1.6923_g	gm1.6923_g	gm1.6923_g	scaffold_21:196859-199757	11.3527	3.95981	-1.51954	0.00155627	yes
e_gw1.17.209.1	e_gw1.17.209.1	e_gw1.17.209.1	scaffold_17:738359-739562	13.1397	4.5825	-1.51972	0.00790177	yes	85470	IPR009078:Ferritin/ribonucleotide reductase-like	-	-	-	transition metal ion binding:GO:0046914;;oxidoreductase activity:GO:0016491
fgenesh1_pg.47_#_6	fgenesh1_pg.47_#_6	fgenesh1_pg.47_#_6	scaffold_47:22224-23399	114.839	39.9621	-1.52291	5.08e-05	yes	39886	IPR000683:Oxidoreductase, N-terminal;;IPR016040:NAD(P)-binding;;IPR004104:Oxidoreductase, C-terminal	sp|O42896|YBQ3_SCHPO Uncharacterized oxidoreductase C115.03 OS=Schizosaccharomyces pombe (strain ATCC 38366 / 972) GN=SPBC115.03 PE=2 SV=1:239.195	1.3.1.20:Trans-1,2-dihydrobenzene-1,2-diol dehydrogenase.	KOG2742:Predicted oxidoreductase	metabolic process:GO:0008152;;trans-1,2-dihydrobenzene-1,2-diol dehydrogenase activity:GO:0047115;;electron transport:GO:0006118;;catalytic activity:GO:0003824;;binding:GO:0005488;;oxidoreductase activity:GO:0016491	01.05.11.07.01 aerobic aromate catabolism
e_gw1.5.95.1	e_gw1.5.95.1	e_gw1.5.95.1	scaffold_5:933980-935164	23.3698	8.12569	-1.52409	0.00319043	yes	76172	IPR016040:NAD(P)-binding;;IPR013154:Alcohol dehydrogenase GroES-like;;IPR013149:Alcohol dehydrogenase, zinc-binding;;IPR011032:GroES-like	sp|O35017|YOGA_BACSU Uncharacterized zinc-type alcohol dehydrogenase-like protein YogA OS=Bacillus subtilis GN=yogA PE=3 SV=1:148.288	1.1.1.1:Alcohol dehydrogenase.	KOG1198:Zinc-binding oxidoreductase	metabolic process:GO:0008152;;alcohol dehydrogenase activity, iron-dependent:GO:0004025;;alcohol dehydrogenase activity, metal ion-independent:GO:0004023;;catalytic activity:GO:0003824;;alcohol dehydrogenase activity, zinc-dependent:GO:0004024;;binding:GO:0005488;;alcohol dehydrogenase activity:GO:0004022	01.05 C-compound and carbohydrate metabolism	02.16.01 alcohol fermentation
e_gw1.14.613.1	e_gw1.14.613.1	e_gw1.14.613.1	scaffold_14:231822-232839	55.1121	19.1394	-1.52583	0.000613525	yes	83358	IPR000923:Blue (type 1) copper domain	-	-	KOG2806:Chitinase	electron transport:GO:0006118;;copper ion binding:GO:0005507;;electron carrier activity:GO:0009055
fgenesh1_pg.4_#_323	fgenesh1_pg.4_#_323	fgenesh1_pg.4_#_323	scaffold_4:1190292-1192770	11.332	3.92629	-1.52916	0.00192215	yes	33976	IPR002761:Protein of unknown function DUF71, ATP-binding region;;IPR002048:Calcium-binding EF-hand;;IPR006175:Endoribonuclease L-PSP;;IPR013813:Endoribonuclease L-PSP/chorismate mutase-like	sp|Q9USQ7|MUG71_SCHPO Meiotically up-regulated gene 71 protein OS=Schizosaccharomyces pombe (strain ATCC 38366 / 972) GN=mug71 PE=1 SV=1:282.722	-	KOG2316:Predicted ATPase (PP-loop superfamily)	calcium ion binding:GO:0005509
estExt_Genewise1Plus.C_240238	estExt_Genewise1Plus.C_240238	estExt_Genewise1Plus.C_240238	scaffold_24:257130-258475	435.157	150.689	-1.52997	8.11e-05	yes	103366	IPR013027:FAD-dependent pyridine nucleotide-disulphide oxidoreductase;;IPR000103:Pyridine nucleotide-disulphide oxidoreductase, class-II;;IPR003953:Fumarate reductase/succinate dehydrogenase flavoprotein, N-terminal	-	-	-	electron transport:GO:0006118;;oxidoreductase activity:GO:0016491
estExt_Genewise1Plus.C_530030	estExt_Genewise1Plus.C_530030	estExt_Genewise1Plus.C_530030	scaffold_53:35628-37525	41.4816	14.347	-1.53173	0.000251675	yes	105266	IPR001214:SET;;IPR002893:Zinc finger, MYND-type	sp|Q9CWR2|SMYD3_MOUSE SET and MYND domain-containing protein 3 OS=Mus musculus GN=Smyd3 PE=2 SV=1:103.99	-	KOG2084:Predicted histone tail methylase containing SET domain	nucleus:GO:0005634;;zinc ion binding:GO:0008270
e_gw1.6.1154.1	e_gw1.6.1154.1	e_gw1.6.1154.1	scaffold_6:1268779-1271303	14.8714	5.13848	-1.53313	0.00155532	yes	77001	IPR001138:Fungal transcriptional regulatory protein, N-terminal	-	-	-	regulation of transcription, DNA-dependent:GO:0006355;;nucleus:GO:0005634;;zinc ion binding:GO:0008270;;transcription factor activity:GO:0003700
estExt_fgenesh2_kg.C_420032	estExt_fgenesh2_kg.C_420032	estExt_fgenesh2_kg.C_420032	scaffold_42:93161-93584	206.799	71.4151	-1.53393	0.000772145	yes
gm1.845_g	gm1.845_g	gm1.845_g	scaffold_1:3066266-3068618	21.3161	7.3507	-1.53599	0.000808706	yes	5289	-	-	-	KOG2992:Nucleolar GTPase/ATPase p130	-
e_gw1.3.1644.1	e_gw1.3.1644.1	e_gw1.3.1644.1	scaffold_3:62141-63555	12.0208	4.14477	-1.53617	0.00610765	yes	73300	IPR013342:Mandelate racemase/muconate lactonizing enzyme, C-terminal;;IPR001354:Mandelate racemase/muconate lactonizing enzyme	sp|Q2KIA9|ENOF1_BOVIN Mitochondrial enolase superfamily member 1 OS=Bos taurus GN=ENOSF1 PE=2 SV=1:474.167	4.2.1.6:Galactonate dehydratase.	-	metabolic process:GO:0008152;;galactonate dehydratase activity:GO:0008869;;catalytic activity:GO:0003824
e_gw1.46.10.1	e_gw1.46.10.1	e_gw1.46.10.1	scaffold_46:26608-27709	15.9143	5.47807	-1.53858	0.00720794	yes	93099	IPR000246:Peptidase T2, asparaginase 2	sp|Q56W64|ASPG3_ARATH Probable isoaspartyl peptidase/L-asparaginase 3 OS=Arabidopsis thaliana GN=At5g61540 PE=2 SV=1:306.605	3.5.1.26:N(4)-(beta-N-acetylglucosaminyl)-L-asparaginase.	KOG1593:Asparaginase	asparaginase activity:GO:0004067;;glycoprotein catabolic process:GO:0006516;;N4-(beta-N-acetylglucosaminyl)-L-asparaginase activity:GO:0003948	01.01.06.01 metabolism of aspartate	01.01.06.02 metabolism of asparagine	01.02.02 nitrogen metabolism	01.05.02.07 sugar, glucoside, polyol and carboxylate catabolism N.crassa	01.05.03 polysaccharide metabolism	01.05.09 aminosaccharide metabolism	01.20.01.07 metabolism of glycosides	14.07.02 modification with sugar residues (e.g. glycosylation, deglycosylation) N.crassa	14.13 protein/peptide degradation
e_gw1.32.81.1	e_gw1.32.81.1	e_gw1.32.81.1	scaffold_32:66447-68324	56.0713	19.2978	-1.53882	0.00032772	yes	91438	IPR002629:Methionine synthase, vitamin-B12 independent	sp|Q975N4|METE_SULTO Probable methylcobalamin:homocysteine methyltransferase OS=Sulfolobus tokodaii (strain DSM 16993 / JCM 10545 / NBRC 100140 / 7) GN=metE PE=3 SV=1:74.3294	-	-	methionine biosynthetic process:GO:0009086;;5-methyltetrahydropteroyltriglutamate-homocysteine S-methyltransferase activity:GO:0003871
e_gw1.2.884.1	e_gw1.2.884.1	e_gw1.2.884.1	scaffold_2:1759240-1761837	113.237	38.9418	-1.53996	1.31e-05	yes	71415	-	sp|P53858|BNI4_YEAST Protein BNI4 OS=Saccharomyces cerevisiae (strain ATCC 204508 / S288c) GN=BNI4 PE=1 SV=1:88.5817	-	KOG2806:Chitinase	cyclic nucleotide-dependent protein kinase activity:GO:0004690;;SAP kinase activity:GO:0016909;;transmembrane receptor protein kinase activity:GO:0019199;;casein kinase I activity:GO:0004681;;MP kinase activity:GO:0008339;;JUN kinase kinase kinase activity:GO:0004706;;transmembrane receptor protein serine/threonine kinase activity:GO:0004675;;3-phosphoinositide-dependent protein kinase activity:G…
gw1.1.728.1	gw1.1.728.1	gw1.1.728.1	scaffold_1:3027666-3028929	45.3054	15.548	-1.54295	0.000408495	yes
estExt_fgenesh1_pg.C_130115	estExt_fgenesh1_pg.C_130115	estExt_fgenesh1_pg.C_130115	scaffold_13:435267-436550	77.6664	26.6495	-1.54318	0.000219914	yes	141920	IPR013027:FAD-dependent pyridine nucleotide-disulphide oxidoreductase;;IPR000103:Pyridine nucleotide-disulphide oxidoreductase, class-II;;IPR001327:Pyridine nucleotide-disulphide oxidoreductase, NAD-binding region;;IPR008255:Pyridine nucleotide-disulphide oxidoreductase, class-II, active site;;IPR005982:Thioredoxin reductase;;IPR000759:Adrenodoxin reductase	sp|P51978|TRXB_NEUCR Thioredoxin reductase OS=Neurospora crassa GN=cys-9 PE=3 SV=1:555.058	-	KOG0404:Thioredoxin reductase	cytoplasm:GO:0005737;;thioredoxin-disulfide reductase activity:GO:0004791;;removal of superoxide radicals:GO:0019430;;FAD binding:GO:0050660;;electron transport:GO:0006118;;oxidoreductase activity:GO:0016491	01.02 nitrogen, sulfur and selenium metabolism N.crassa	01.03.04 pyrimidine nucleotide/nucleoside/nucleobase metabolism T.acidophilum	01.03.07 deoxyribonucleotide metabolism	01.20.37.01 metabolism of thioredoxin, glutaredoxin, glutathion B.subtilis	20.01.15 electron transport	32.01.01 oxidative stress response	32.07.07 oxygen and radical detoxification	34.11.11 rhythm (e.g. circadian, ultradian)	16.21.05 FAD/FMN binding	16.21.07 NAD/NADP binding
estExt_Genemark1.C_150135	estExt_Genemark1.C_150135	estExt_Genemark1.C_150135	scaffold_15:488314-489591	68.1671	23.3456	-1.54592	0.000296015	yes	25753	IPR007905:Emopamil-binding	sp|Q60490|EBP_CAVPO 3-beta-hydroxysteroid-Delta(8),Delta(7)-isomerase OS=Cavia porcellus GN=EBP PE=1 SV=3:153.295	5.3.3.5:Cholestenol delta-isomerase.	KOG4826:C-8,7 sterol isomerase	endoplasmic reticulum:GO:0005783;;cholestenol delta-isomerase activity:GO:0047750;;sterol metabolic process:GO:0016125;;integral to membrane:GO:0016021	01.06 lipid, fatty acid and isoprenoid metabolism	01.06.06.11 tetracyclic and pentacyclic triterpenes (cholesterin, steroids and hopanoids) metabolism	20.01.27 drug/toxin transport	30.05.01 receptor enzyme mediated signalling	16.13 C-compound binding
estExt_fgenesh1_pg.C_140046	estExt_fgenesh1_pg.C_140046	estExt_fgenesh1_pg.C_140046	scaffold_14:189842-191022	83.1909	28.4885	-1.54605	9.23e-05	yes	141993	IPR016040:NAD(P)-binding;;IPR005106:Aspartate/homoserine dehydrogenase, NAD-binding;;IPR001342:Homoserine dehydrogenase, catalytic	sp|Q5B998|DHOM_EMENI Homoserine dehydrogenase OS=Emericella nidulans GN=AN2882 PE=1 SV=1:401.749	1.1.1.3:Homoserine dehydrogenase.	KOG0455:Homoserine dehydrogenase	metabolic process:GO:0008152;;homoserine dehydrogenase activity:GO:0004412;;amino acid biosynthetic process:GO:0008652;;catalytic activity:GO:0003824;;binding:GO:0005488	01.01 amino acid metabolism	01.01.06.04.01 biosynthesis of threonine	01.01.06.05 metabolism of methionine	01.01.06.06.01 biosynthesis of lysine	01.01.09.02 metabolism of serine
estExt_Genemark1.C_110157	estExt_Genemark1.C_110157	estExt_Genemark1.C_110157	scaffold_11:564719-566287	46.7606	15.999	-1.54731	0.000196857	yes	25303	IPR001155:NADH:flavin oxidoreductase/NADH oxidase, N-terminal	sp|O94467|OYEC_SCHPO Putative NADPH dehydrogenase C23G7.10c OS=Schizosaccharomyces pombe (strain ATCC 38366 / 972) GN=SPBC23G7.10c PE=2 SV=1:366.311	1.3.1.42:12-oxophytodienoate reductase.	KOG0134:NADH:flavin oxidoreductase/12-oxophytodienoate reductase	12-oxophytodienoate reductase activity:GO:0016629;;oxidoreductase activity:GO:0016491;;FMN binding:GO:0010181	01.02.02.09 catabolism of nitrogenous compounds	02.11 electron transport and membrane-associated energy conservation B.subtilis	02.45 energy conversion and regeneration	20.01.15 electron transport
e_gw1.7.1129.1	e_gw1.7.1129.1	e_gw1.7.1129.1	scaffold_7:865900-867070	14.5026	4.95422	-1.54959	0.00507982	yes	77600	IPR001395:Aldo/keto reductase	sp|Q04212|ARA2_YEAST D-arabinose 1-dehydrogenase OS=Saccharomyces cerevisiae (strain ATCC 204508 / S288c) GN=ARA2 PE=1 SV=1:217.624	-	KOG1576:Predicted oxidoreductase	oxidoreductase activity:GO:0016491
e_gw1.1.1838.1	e_gw1.1.1838.1	e_gw1.1.1838.1	scaffold_1:3374927-3376682	26.1912	8.94529	-1.54988	0.000718677	yes	68698	IPR007114:Major facilitator superfamily;;IPR011701:Major facilitator superfamily MFS-1;;IPR016196:MFS general substrate transporter	sp|O43081|YHS6_SCHPO Uncharacterized MFS-type transporter C947.06c OS=Schizosaccharomyces pombe (strain ATCC 38366 / 972) GN=SPBC947.06c PE=2 SV=1:402.905	-	KOG0255:Synaptic vesicle transporter SVOP and related transporters (major facilitator superfamily)	transporter activity:GO:0005215;;integral to membrane:GO:0016021;;transport:GO:0006810	20.01.11 amine / polyamine transport	20.01.27 drug/toxin transport	20.09.16 cellular export and secretion	32.05.01 resistance proteins	32.07 detoxification	32.07.05 detoxification by export	20.03 transport facilities
estExt_fgenesh1_pm.C_250016	estExt_fgenesh1_pm.C_250016	estExt_fgenesh1_pm.C_250016	scaffold_25:48036-49430	22.9675	7.807	-1.55675	0.0025375	yes	138876	IPR003042:Aromatic-ring hydroxylase;;IPR006076:FAD dependent oxidoreductase	sp|Q01911|TETX_BACFR Tetracycline resistance protein from transposon Tn4351/Tn4400 OS=Bacteroides fragilis GN=tetX PE=4 SV=1:60.8474	-	KOG2614:Kynurenine 3-monooxygenase and related flavoprotein monooxygenases	metabolic process:GO:0008152;;oxidoreductase activity:GO:0016491	01.05.11.07.01 aerobic aromate catabolism
gm1.3042_g	gm1.3042_g	gm1.3042_g	scaffold_5:1410620-1412150	57.3404	19.4515	-1.55967	0.00354447	yes
fgenesh1_pg.1_#_268	fgenesh1_pg.1_#_268	fgenesh1_pg.1_#_268	scaffold_1:1076877-1079810	48.6604	16.5004	-1.56024	2.54e-05	yes	31779	IPR002073:3'5'-cyclic nucleotide phosphodiesterase;;IPR003607:Metal-dependent phosphohydrolase, HD region	sp|Q23917|PDE2_DICDI 3&apos;,5&apos;-cyclic-nucleotide phosphodiesterase regA OS=Dictyostelium discoideum GN=regA PE=1 SV=1:141.354	-	KOG3689:Cyclic nucleotide phosphodiesterase	signal transduction:GO:0007165;;3',5'-cyclic-nucleotide phosphodiesterase activity:GO:0004114;;catalytic activity:GO:0003824	30.01.09.07 cAMP/cGMP mediated signal transduction
e_gw1.1.1740.1	e_gw1.1.1740.1	e_gw1.1.1740.1	scaffold_1:1754896-1756415	118.374	40.0802	-1.56239	1.31e-05	yes	68234	IPR013027:FAD-dependent pyridine nucleotide-disulphide oxidoreductase;;IPR012999:Pyridine nucleotide-disulphide oxidoreductase, class I, active site;;IPR004099:Pyridine nucleotide-disulphide oxidoreductase, dimerisation;;IPR000815:Mercuric reductase;;IPR001327:Pyridine nucleotide-disulphide oxidoreductase, NAD-binding region;;IPR016156:FAD/NAD-linked reductase, dimerisation;;IPR006322:Glutathione…	sp|Q873E8|GSHR_NEUCR Glutathione reductase OS=Neurospora crassa GN=glr-1 PE=3 SV=1:746.888	-	KOG0405:Pyridine nucleotide-disulphide oxidoreductase	cytoplasm:GO:0005737;;FAD binding:GO:0050660;;glutathione metabolic process:GO:0006749;;electron transport:GO:0006118;;oxidoreductase activity:GO:0016491;;NADP binding:GO:0050661;;cell redox homeostasis:GO:0045454;;glutathione-disulfide reductase activity:GO:0004362	01.05 C-compound and carbohydrate metabolism	01.20.37.01 metabolism of thioredoxin, glutaredoxin, glutathion	02.01 glycolysis and gluconeogenesis	02.10 tricarboxylic-acid pathway (citrate cycle, Krebs cycle, TCA cycle) B.subtilis	20.01.15 electron transport	32.01 stress response	32.01.01 oxidative stress response	32.07 detoxification	32.07.07 oxygen and radical detoxification	32.07.07.03 glutathione conjugation reaction	34.01 homeostasis	16.14 selen binding	16.21.05 FAD/FMN binding	16.21.07 NAD/NADP binding
fgenesh1_pg.4_#_68	fgenesh1_pg.4_#_68	fgenesh1_pg.4_#_68	scaffold_4:197517-198385	16.658	5.63118	-1.56471	0.00899148	yes
e_gw1.22.92.1	e_gw1.22.92.1	e_gw1.22.92.1	scaffold_22:23095-25116	35.3405	11.9199	-1.56795	0.0001732	yes	88074	IPR002100:Transcription factor, MADS-box	sp|Q12224|RLM1_YEAST Transcription factor RLM1 OS=Saccharomyces cerevisiae (strain ATCC 204508 / S288c) GN=RLM1 PE=1 SV=1:120.168	6.3.2.-:Acid--D-amino-acid ligases (peptide synthases).	KOG0014:MADS box transcription factor	regulation of transcription, DNA-dependent:GO:0006355;;nucleus:GO:0005634;;coenzyme F420-0 gamma-glutamyl ligase activity:GO:0043773;;transcription factor activity:GO:0003700;;UDP-N-acetylmuramoylalanyl-D-glutamyl-2,6-diaminopimelate-D-alanyl-D-alanine ligase activity:GO:0008766;;sequence-specific DNA binding:GO:0043565;;ribosomal S6-glutamic acid ligase activity:GO:0018169;;coenzyme F420-2 alpha…
estExt_Genewise1.C_6_t20173	estExt_Genewise1.C_6_t20173	estExt_Genewise1.C_6_t20173	scaffold_6:705905-707879	753.757	253.921	-1.56972	0.00142347	yes	109514	IPR004631:4-aminobutyrate aminotransferase, eukaryotic;;IPR015424:Pyridoxal phosphate-dependent transferase, major region;;IPR005814:Aminotransferase class-III	sp|P14010|GATA_EMENI 4-aminobutyrate aminotransferase OS=Emericella nidulans GN=gatA PE=3 SV=1:602.053	2.6.1.19:4-aminobutyrate aminotransferase.	KOG1405:4-aminobutyrate aminotransferase	pyridoxal phosphate binding:GO:0030170;;transaminase activity:GO:0008483;;gamma-aminobutyric acid metabolic process:GO:0009448;;4-aminobutyrate transaminase activity:GO:0003867	01.01 amino acid metabolism	01.02 nitrogen, sulfur and selenium metabolism S.cerevisiae	01.02.07 regulation of nitrogen, sulfur and selenium metabolism S.cerevisiae	01.05 C-compound and carbohydrate metabolism	01.20.17 metabolism of secondary products derived from primary amino acids	16.21.17 pyridoxal phosphate binding
estExt_fgenesh1_pm.C_90176	estExt_fgenesh1_pm.C_90176	estExt_fgenesh1_pm.C_90176	scaffold_9:617730-618778	11.7267	3.94142	-1.573	0.00927546	yes	137346	IPR001395:Aldo/keto reductase	sp|O94246|GSH0_SCHPO Putative glutamate--cysteine ligase regulatory subunit OS=Schizosaccharomyces pombe (strain ATCC 38366 / 972) GN=SPCC737.06c PE=2 SV=1:86.2705	6.3.2.2:Glutamate--cysteine ligase.	KOG3023:Glutamate-cysteine ligase regulatory subunit	glutamate-cysteine ligase complex:GO:0017109;;glutamate-cysteine ligase activity:GO:0004357;;oxidoreductase activity:GO:0016491	01.20.37.01 metabolism of thioredoxin, glutaredoxin, glutathion N.crassa
estExt_fgenesh1_pm.C_50297	estExt_fgenesh1_pm.C_50297	estExt_fgenesh1_pm.C_50297	scaffold_5:1053219-1054829	32.0906	10.7498	-1.57784	0.000678137	yes	136652	IPR001251:Cellular retinaldehyde-binding/triple function, C-terminal;;IPR011074:Phosphatidylinositol transfer protein-like, N-terminal	sp|Q4WEP0|SFH5_ASPFU Phosphatidylinositol transfer protein sfh5 OS=Neosartorya fumigata (strain ATCC MYA-4609 / Af293 / CBS 101355 / FGSC A1100) GN=sfh5 PE=3 SV=1:317.39	-	KOG1471:Phosphatidylinositol transfer protein SEC14 and related proteins	-	20.01.13 lipid/fatty acid transport
estExt_Genewise1.C_9_t10402	estExt_Genewise1.C_9_t10402	estExt_Genewise1.C_9_t10402	scaffold_9:545223-547327	99.8743	33.4517	-1.57803	1.17e-05	yes	110957	IPR001019:Guanine nucleotide binding protein (G-protein), alpha subunit;;IPR002975:Fungal G-protein, alpha subunit;;IPR011025:G protein alpha subunit, helical insertion	sp|Q05424|GPA2_NEUCR Guanine nucleotide-binding protein alpha-2 subunit OS=Neurospora crassa GN=gna-2 PE=2 SV=1:586.26	-	KOG0082:G-protein alpha subunit (small G protein superfamily)	signal transduction:GO:0007165;;G-protein coupled receptor protein signaling pathway:GO:0007186;;signal transducer activity:GO:0004871;;guanyl nucleotide binding:GO:0019001;;GTP binding:GO:0005525	01.03.01 purin nucleotide/nucleoside/nucleobase metabolism	01.04 phosphate metabolism	14.07.03 modification by phosphorylation, dephosphorylation, autophosphorylation	14.07.09 posttranslational modification of amino acids (e.g. hydroxylation, methylation)	30.01 cellular signalling	30.01.05.01 protein kinase	30.01.05.05 G-protein mediated signal transduction	30.01.05.05.01 small GTPase mediated signal transduction	30.01.05.05.03 trimeric G-protein mediated signal transduction	30.01.09 second messenger mediated signal transduction	30.01.09.07 cAMP/cGMP mediated signal transduction	30.05 transmembrane signal transduction	30.05.02.24 G-protein coupled receptor signalling pathway	34.01.01.01 homeostasis of metal ions (Na, K, Ca etc.)	34.11.03.07 pheromone response, mating-type determination, sex-specific proteins S.cerevisiae	34.11.12 perception of nutrients and nutritional adaptation S.cerevisiae	36.25.01.13 olfaction	40.01 cell growth / morphogenesis	40.01.03.01 regulation of directional cell growth	43.01.03.05 budding, cell polarity and filament formation S.cerevisiae	43.01.03.07 development of conidia	43.01.03.09 development of asco- basidio- or zygospore S.cerevisiae	43.03 animal cell type differentiation	16.01 protein binding	16.19 nucleotide/nucleoside/nucleobase binding	16.19.05 GTP binding	18.01.01 regulation by modification	18.01.07 regulation by binding / dissociation	18.02.01 enzymatic activity regulation / enzyme regulator	18.02.01.01 enzyme activator	18.02.03 guanyl-nucleotide exchange factor (GEF)
e_gw1.17.386.1	e_gw1.17.386.1	e_gw1.17.386.1	scaffold_17:614687-616176	31.1404	10.4181	-1.57969	0.000818313	yes	85478	IPR000340:Protein-tyrosine phosphatase, dual specificity	sp|Q02256|PVH1_YEAST Tyrosine-protein phosphatase YVH1 OS=Saccharomyces cerevisiae (strain ATCC 204508 / S288c) GN=YVH1 PE=1 SV=1:145.206	3.1.3.48:Protein-tyrosine-phosphatase.	KOG1716:Dual specificity phosphatase	protein tyrosine/serine/threonine phosphatase activity:GO:0008138;;protein amino acid dephosphorylation:GO:0006470;;prenylated protein tyrosine phosphatase activity:GO:0004727;;protein tyrosine phosphatase activity:GO:0004725	14.07.03 modification by phosphorylation, dephosphorylation, autophosphorylation N.crassa	32.01.11 nutrient starvation response
gm1.1449_g	gm1.1449_g	gm1.1449_g	scaffold_2:1555807-1557881	25.9909	8.69513	-1.57973	0.000719816	yes	5893	IPR003733:Thiamine monophosphate synthase;;IPR000417:Hydroxyethylthiazole kinase	sp|P40386|THI4_SCHPO Probable thiamine biosynthetic bifunctional enzyme OS=Schizosaccharomyces pombe (strain ATCC 38366 / 972) GN=thi4 PE=2 SV=1:352.443	-	KOG2598:Phosphomethylpyrimidine kinase	thiamin-phosphate diphosphorylase activity:GO:0004789;;hydroxyethylthiazole kinase activity:GO:0004417;;thiamin biosynthetic process:GO:0009228	01.04 phosphate metabolism	01.07.01 biosynthesis of vitamins, cofactors, and prosthetic groups S.cerevisiae
gw1.3.800.1	gw1.3.800.1	gw1.3.800.1	scaffold_3:384604-386565	53.4696	17.8849	-1.57998	0.000118003	yes	53248	IPR001138:Fungal transcriptional regulatory protein, N-terminal	-	-	-	regulation of transcription, DNA-dependent:GO:0006355;;nucleus:GO:0005634;;zinc ion binding:GO:0008270;;transcription factor activity:GO:0003700
e_gw1.12.177.1	e_gw1.12.177.1	e_gw1.12.177.1	scaffold_12:248447-252164	37.4769	12.5144	-1.58241	1.37e-05	yes	82249	IPR009078:Ferritin/ribonucleotide reductase-like	-	-	KOG2992:Nucleolar GTPase/ATPase p130	transition metal ion binding:GO:0046914;;oxidoreductase activity:GO:0016491
estExt_Genewise1.C_2_t40018	estExt_Genewise1.C_2_t40018	estExt_Genewise1.C_2_t40018	scaffold_2:1893213-1893911	736.87	245.924	-1.5832	1.59e-05	yes
e_gw1.25.208.1	e_gw1.25.208.1	e_gw1.25.208.1	scaffold_25:175283-176540	17.0503	5.68724	-1.584	0.00279964	yes	89263	IPR002213:UDP-glucuronosyl/UDP-glucosyltransferase	sp|O31853|YOJK_BACSU Uncharacterized UDP-glucosyltransferase yojK OS=Bacillus subtilis GN=yojK PE=3 SV=2:67.0106	2.4.1.17:UDP-glucuronosyltransferase.	KOG1192:UDP-glucuronosyl and UDP-glucosyl transferase	glucuronosyltransferase activity:GO:0015020;;transferase activity, transferring hexosyl groups:GO:0016758;;metabolic process:GO:0008152
estExt_Genewise1Plus.C_15_t10074	estExt_Genewise1Plus.C_15_t10074	estExt_Genewise1Plus.C_15_t10074	scaffold_15:96057-99650	108.422	36.1457	-1.58476	6.66e-06	yes	101321	-	-	-	KOG2510:SWI-SNF chromatin-remodeling complex protein	-
gm1.1448_g	gm1.1448_g	gm1.1448_g	scaffold_2:1552898-1555566	13.2004	4.38487	-1.58997	0.00152878	yes	5892	IPR001138:Fungal transcriptional regulatory protein, N-terminal	sp|P49412|PRIB_LENED Protein priB OS=Lentinula edodes GN=priB PE=2 SV=1:64.6994	-	-	regulation of transcription, DNA-dependent:GO:0006355;;nucleus:GO:0005634;;zinc ion binding:GO:0008270;;transcription factor activity:GO:0003700
fgenesh1_pg.20_#_28	fgenesh1_pg.20_#_28	fgenesh1_pg.20_#_28	scaffold_20:99609-101611	52.9096	17.4597	-1.5995	4.42e-05	yes	37895	IPR011701:Major facilitator superfamily MFS-1;;IPR016196:MFS general substrate transporter	sp|Q870L2|MIRB_EMENI Siderophore iron transporter mirB OS=Emericella nidulans GN=mirB PE=3 SV=1:485.337	-	KOG0254:Predicted transporter (major facilitator superfamily)	-	20.01.01.01.01.01 siderophore-iron transport	20.09.18.07 non-vesicular cellular import	34.01.01.01 homeostasis of metal ions (Na, K, Ca etc.) N.crassa
estExt_Genewise1.C_300320	estExt_Genewise1.C_300320	estExt_Genewise1.C_300320	scaffold_30:352401-355020	12.5227	4.12688	-1.60142	0.00189463	yes	115940	IPR002110:Ankyrin	sp|Q9ULJ7|ANR50_HUMAN Ankyrin repeat domain-containing protein 50 OS=Homo sapiens GN=ANKRD50 PE=1 SV=4:54.6842;;sp|Q9ULJ7|ANR50_HUMAN Ankyrin repeat domain-containing protein 50 OS=Homo sapiens GN=ANKRD50 PE=1 SV=4:72.4034;;sp|Q9ULJ7|ANR50_HUMAN Ankyrin repeat domain-containing protein 50 OS=Homo sapiens GN=ANKRD50 PE=1 SV=4:55.0694;;sp|Q9ULJ7|ANR50_HUMAN Ankyrin repeat domain-containing protein …	-	KOG0504:FOG: Ankyrin repeat	-
estExt_Genewise1.C_280038	estExt_Genewise1.C_280038	estExt_Genewise1.C_280038	scaffold_28:39591-41002	16.8443	5.51826	-1.60997	0.00221448	yes	115513	-	sp|Q9UUE3|YNZ6_SCHPO Putative lysine N-acyltransferase C17G9.06c OS=Schizosaccharomyces pombe (strain ATCC 38366 / 972) GN=SPBC17G9.06c PE=2 SV=1:154.066	-	-	-
e_gw1.1.1587.1	e_gw1.1.1587.1	e_gw1.1.1587.1	scaffold_1:1440429-1441938	29.391	9.61109	-1.6126	0.000546747	yes	69643	-	-	-	KOG1216:von Willebrand factor and related coagulation proteins	-
estExt_Genemark1.C_130146	estExt_Genemark1.C_130146	estExt_Genemark1.C_130146	scaffold_13:553711-556858	51.6772	16.8418	-1.61749	5.95e-06	yes
e_gw1.15.119.1	e_gw1.15.119.1	e_gw1.15.119.1	scaffold_15:722578-724310	49.0109	15.9694	-1.61779	8.98e-05	yes	84399	IPR007114:Major facilitator superfamily;;IPR011701:Major facilitator superfamily MFS-1;;IPR016196:MFS general substrate transporter	sp|O74923|YJ7D_SCHPO Uncharacterized transporter C757.13 OS=Schizosaccharomyces pombe (strain ATCC 38366 / 972) GN=SPCC757.13 PE=2 SV=1:318.161	-	KOG2533:Permease of the major facilitator superfamily	transporter activity:GO:0005215;;integral to membrane:GO:0016021;;transport:GO:0006810
estExt_Genewise1Plus.C_1_t50056	estExt_Genewise1Plus.C_1_t50056	estExt_Genewise1Plus.C_1_t50056	scaffold_1:2610188-2611900	94.1273	30.6547	-1.6185	1.43e-05	yes
e_gw1.2.1431.1	e_gw1.2.1431.1	e_gw1.2.1431.1	scaffold_2:1311659-1313765	20.2814	6.59283	-1.62119	0.000404316	yes	70891	IPR016024:Armadillo-type fold;;IPR002048:Calcium-binding EF-hand	sp|Q9P7W7|YGQ3_SCHPO Uncharacterized ARM-like repeat-containing protein C1703.03c OS=Schizosaccharomyces pombe (strain ATCC 38366 / 972) GN=SPBC1703.03c PE=2 SV=1:119.783	-	KOG1815:Predicted E3 ubiquitin ligase	calcium ion binding:GO:0005509;;binding:GO:0005488
e_gw1.3.445.1	e_gw1.3.445.1	e_gw1.3.445.1	scaffold_3:1309106-1310138	27.1105	8.79141	-1.62468	0.0016919	yes	72641	IPR007065:HPP;;IPR000783:RNA polymerase, subunit H/Rpb5 C-terminal	sp|Q55EF8|Y9096_DICDI Transmembrane protein DDB_G0269096 OS=Dictyostelium discoideum GN=DDB_G0269096 PE=4 SV=1:103.99	-	-	transcription:GO:0006350;;DNA binding:GO:0003677;;DNA-directed RNA polymerase activity:GO:0003899
e_gw1.24.267.1	e_gw1.24.267.1	e_gw1.24.267.1	scaffold_24:312697-314396	342.707	111.081	-1.62536	3.25e-05	yes	88726	IPR002974:Cytochrome P450, E-class, CYP52;;IPR001128:Cytochrome P450;;IPR002401:Cytochrome P450, E-class, group I	sp|Q9Y757|CP52L_DEBHA Cytochrome P450 52A12 OS=Debaryomyces hansenii (strain ATCC 36239 / CBS 767 / JCM 1990 / NBRC 0083 / IGC 2968) GN=CYP52A12 PE=2 SV=2:374.4	1.14.14.1:Unspecific monooxygenase.	KOG0157:Cytochrome P450 CYP4/CYP19/CYP26 subfamilies	oxidoreductase activity, acting on paired donors, with incorporation or reduction of molecular oxygen, reduced flavin or flavoprotein as one donor, and incorporation of one atom of oxygen:GO:0016712;;electron transport:GO:0006118;;unspecific monooxygenase activity:GO:0050381;;heme binding:GO:0020037;;monooxygenase activity:GO:0004497;;iron ion binding:GO:0005506	01.06 lipid, fatty acid and isoprenoid metabolism N.crassa	01.20.05.03 metabolism of alkanes, alkenes, alkanals, alkanols N.crassa	02.45 energy conversion and regeneration
e_gw1.26.119.1	e_gw1.26.119.1	e_gw1.26.119.1	scaffold_26:215063-216783	22.1205	7.16979	-1.62538	0.000734766	yes
fgenesh1_pg.6_#_63	fgenesh1_pg.6_#_63	fgenesh1_pg.6_#_63	scaffold_6:203368-205402	23.4731	7.59772	-1.62737	0.000456929	yes	34488	IPR000873:AMP-dependent synthetase and ligase	sp|Q3URE1|ACSF3_MOUSE Acyl-CoA synthetase family member 3, mitochondrial OS=Mus musculus GN=Acsf3 PE=2 SV=2:120.553	6.2.1.12:4-coumarate--CoA ligase.	KOG1176:Acyl-CoA synthetase	4-coumarate-CoA ligase activity:GO:0016207;;metabolic process:GO:0008152;;catalytic activity:GO:0003824
estExt_Genewise1Plus.C_1_t10080	estExt_Genewise1Plus.C_1_t10080	estExt_Genewise1Plus.C_1_t10080	scaffold_1:111507-114566	96.7273	31.2255	-1.6312	4.02e-06	yes	93737	IPR010255:Haem peroxidase;;IPR002016:Haem peroxidase, plant/fungal/bacterial;;IPR002889:Carbohydrate-binding WSC;;IPR013994:Carbohydrate-binding WSC, subgroup	sp|P84675|PFM_CHAGB Putative fungistatic metabolite OS=Chaetomium globosum GN=CHGG_05463 PE=1 SV=2:117.472;;sp|P84675|PFM_CHAGB Putative fungistatic metabolite OS=Chaetomium globosum GN=CHGG_05463 PE=1 SV=2:133.65	-	KOG4157:beta-1,6-N-acetylglucosaminyltransferase, contains WSC domain	response to oxidative stress:GO:0006979;;electron transport:GO:0006118;;peroxidase activity:GO:0004601;;heme binding:GO:0020037	32.10.07 degradation / modification of foreign (exogenous) polysaccharides N.crassa
fgenesh2_kg.7_#_109_#_gi|30121351|gb|CB906693.1|CB906693	fgenesh2_kg.7_#_109_#_gi|30121351|gb|CB906693.1|CB906693	fgenesh2_kg.7_#_109_#_gi|30121351|gb|CB906693.1|CB906693	scaffold_7:922099-922449	141.285	45.6069	-1.63129	0.00272591	yes
e_gw1.14.396.1	e_gw1.14.396.1	e_gw1.14.396.1	scaffold_14:726223-728275	78.7276	25.4008	-1.63199	6.1e-06	yes	83320	IPR000873:AMP-dependent synthetase and ligase	sp|O31826|YNGI_BACSU Putative acyl-CoA synthetase YngI OS=Bacillus subtilis GN=yngI PE=3 SV=1:365.155	6.2.1.3:Long-chain-fatty-acid--CoA ligase.	KOG1177:Long chain fatty acid acyl-CoA ligase	medium-chain-fatty-acid-CoA ligase activity:GO:0031956;;metabolic process:GO:0008152;;short-chain-fatty-acid-CoA ligase activity:GO:0031955;;long-chain-fatty-acid-CoA ligase activity:GO:0004467;;catalytic activity:GO:0003824;;very-long-chain-fatty-acid-CoA ligase activity:GO:0031957;;fatty-acid ligase activity:GO:0015645	01.06 lipid, fatty acid and isoprenoid metabolism N.crassa	01.06.02.01 phospholipid metabolism	16.19 nucleotide/nucleoside/nucleobase binding B.subtilis
fgenesh1_pg.8_#_195	fgenesh1_pg.8_#_195	fgenesh1_pg.8_#_195	scaffold_8:811930-814240	26.0454	8.38223	-1.63562	0.000152575	yes	35405	-	-	3.6.1.-:In phosphorous-containing anhydrides.	KOG2510:SWI-SNF chromatin-remodeling complex protein	thiamin-pyrophosphatase activity:GO:0004787;;diacylglycerol pyrophosphate phosphatase activity:GO:0000810;;pyrophosphatase activity:GO:0016462;;dihydroneopterin triphosphate pyrophosphohydrolase activity:GO:0019177;;UDP-2,3-diacylglucosamine hydrolase activity:GO:0008758;;bis(5'-nucleosyl)-tetraphosphatase activity:GO:0008796;;ATP-dependent 5'-3' DNA helicase activity:GO:0043141;;dATP pyrophospho…
fgenesh1_pm.22_#_70	fgenesh1_pm.22_#_70	fgenesh1_pm.22_#_70	scaffold_22:221770-223143	88.352	28.4315	-1.63577	5.03e-05	yes	133150	IPR000092:Polyprenyl synthetase;;IPR008949:Terpenoid synthase	sp|Q92236|GGPPS_GIBFU Geranylgeranyl pyrophosphate synthase OS=Gibberella fujikuroi GN=GGS PE=3 SV=1:523.472	-	KOG0777:Geranylgeranyl pyrophosphate synthase/Polyprenyl synthetase	isoprenoid biosynthetic process:GO:0008299	01.06.06 isoprenoid metabolism	01.06.06.11 tetracyclic and pentacyclic triterpenes (cholesterin, steroids and hopanoids) metabolism &nbsp;
estExt_Genewise1Plus.C_10_t10343	estExt_Genewise1Plus.C_10_t10343	estExt_Genewise1Plus.C_10_t10343	scaffold_10:454636-456450	94.4551	30.3087	-1.6399	5.62e-06	yes	99681	IPR001849:Pleckstrin-like	sp|P53907|YNO4_YEAST Uncharacterized protein YNL144C OS=Saccharomyces cerevisiae (strain ATCC 204508 / S288c) GN=YNL144C PE=1 SV=1:55.4546	-	KOG0517:Beta-spectrin	-
estExt_Genewise1Plus.C_3_t30066	estExt_Genewise1Plus.C_3_t30066	estExt_Genewise1Plus.C_3_t30066	scaffold_3:1305686-1308297	41.1147	13.1901	-1.6402	2.45e-05	yes	96543	-	sp|Q5UNY4|YL728_MIMIV Uncharacterized protein L728 OS=Acanthamoeba polyphaga mimivirus GN=MIMI_L728 PE=4 SV=1:174.481	-	KOG1809:Vacuolar protein sorting-associated protein	-
fgenesh1_pm.8_#_141	fgenesh1_pm.8_#_141	fgenesh1_pm.8_#_141	scaffold_8:548482-549714	52.6515	16.884	-1.64082	0.000229573	yes	129898	IPR016040:NAD(P)-binding;;IPR001509:NAD-dependent epimerase/dehydratase	sp|P53111|ARI1_YEAST NADPH-dependent aldehyde reductase ARI1 OS=Saccharomyces cerevisiae (strain ATCC 204508 / S288c) GN=ARI1 PE=1 SV=1:233.417	1.1.1.195:Cinnamyl-alcohol dehydrogenase.	KOG1502:Flavonol reductase/cinnamoyl-CoA reductase	cinnamyl-alcohol dehydrogenase activity:GO:0045551;;metabolic process:GO:0008152;;coenzyme binding:GO:0050662;;cellular metabolic process:GO:0044237;;catalytic activity:GO:0003824;;binding:GO:0005488	01.05 C-compound and carbohydrate metabolism	01.07 metabolism of vitamins, cofactors, and prosthetic groups S.cerevisiae	01.07.01 biosynthesis of vitamins, cofactors, and prosthetic groups S.cerevisiae	01.20.35.01 metabolism of phenylpropanoids	02.01.01 glycolysis methylglyoxal bypass	32.01.01 oxidative stress response	32.01.03 osmotic and salt stress response	32.01.04 pH stress response	32.01.05 heat shock response	32.07.03 detoxification by modification	42.01 cell wall
e_gw1.3.605.1	e_gw1.3.605.1	e_gw1.3.605.1	scaffold_3:1398342-1398834	61.1746	19.5787	-1.64365	0.00407899	yes
e_gw1.35.113.1	e_gw1.35.113.1	e_gw1.35.113.1	scaffold_35:56039-57182	560.264	179.285	-1.64385	4.47e-05	yes	91910	IPR003689:Zinc/iron permease;;IPR004698:Zinc/iron permease, fungal and plant	sp|P32804|ZRT1_YEAST Zinc-regulated transporter 1 OS=Saccharomyces cerevisiae (strain ATCC 204508 / S288c) GN=ZRT1 PE=2 SV=1:406.371	-	KOG1558:Fe2+/Zn2+ regulated transporter	integral to membrane:GO:0016021;;metal ion transmembrane transporter activity:GO:0046873;;zinc ion transport:GO:0006829;;membrane:GO:0016020;;zinc ion transmembrane transporter activity:GO:0005385;;metal ion transport:GO:0030001	20.01.01.01.01 heavy metal ion transport (Cu+, Fe3+, etc.) N.crassa	20.09.18.07 non-vesicular cellular import	34.01.01.01 homeostasis of metal ions (Na, K, Ca etc.) N.crassa
estExt_fgenesh1_pm.C_220159	estExt_fgenesh1_pm.C_220159	estExt_fgenesh1_pm.C_220159	scaffold_22:505633-506672	211.905	67.7156	-1.64585	1.07e-05	yes
e_gw1.2.168.1	e_gw1.2.168.1	e_gw1.2.168.1	scaffold_2:2287549-2288249	32.965	10.4954	-1.65118	0.00341619	yes	72115	IPR012337:Polynucleotidyl transferase, Ribonuclease H fold;;IPR013520:Exonuclease, RNase T and DNA polymerase III;;IPR006055:Exonuclease	sp|P54964|ORN_YEAST Oligoribonuclease, mitochondrial OS=Saccharomyces cerevisiae (strain ATCC 204508 / S288c) GN=REX2 PE=1 SV=1:160.999	3.1.-.-:Acting on ester bonds.	KOG3242:Oligoribonuclease (3'->5' exoribonuclease)	nucleic acid binding:GO:0003676;;phosphoric ester hydrolase activity:GO:0042578;;exonuclease activity:GO:0004527;;T/G mismatch-specific endonuclease activity:GO:0043765;;nuclease activity:GO:0004518;;intracellular:GO:0005622	01.03.01 purin nucleotide/nucleoside/nucleobase metabolism	01.03.04 pyrimidine nucleotide/nucleoside/nucleobase metabolism	01.03.16 polynucleotide degradation	01.03.16.01 RNA degradation	01.03.16.03 DNA degradation	11.04.01 rRNA processing	32.10.03 degradation / modification of foreign (exogenous) polynucleotides &nbsp;	16.03.01 DNA binding	16.03.03 RNA binding	16.17.09 heavy metal binding (Cu, Fe, Zn)
fgenesh1_pg.11_#_218	fgenesh1_pg.11_#_218	fgenesh1_pg.11_#_218	scaffold_11:828234-830009	16.848	5.36376	-1.65126	0.000818313	yes	36248	IPR005289:GTP-binding;;IPR014813:GNL3L/Grn1 putative GTPase;;IPR006073:GTP1/OBG;;IPR002917:GTP-binding protein, HSR1-related	sp|P40010|NUG1_YEAST Nuclear GTP-binding protein NUG1 OS=Saccharomyces cerevisiae (strain ATCC 204508 / S288c) GN=NUG1 PE=1 SV=1:447.973	-	KOG2484:GTPase	GTP binding:GO:0005525;;intracellular:GO:0005622	11.04.01 rRNA processing	12.01 ribosome biogenesis	20.09.01 nuclear transport	16.19.05 GTP binding	20.03 transport facilities
fgenesh1_pg.5_#_1	fgenesh1_pg.5_#_1	fgenesh1_pg.5_#_1	scaffold_5:199-1829	29.7317	9.41524	-1.65893	0.00038582	yes	34062	-	sp|Q06466|VP62L_YEAST Putative vacuolar protein sorting-associated protein YPR157W OS=Saccharomyces cerevisiae (strain ATCC 204508 / S288c) GN=YPR157W PE=2 SV=1:160.229	-	-	-
e_gw1.30.209.1	e_gw1.30.209.1	e_gw1.30.209.1	scaffold_30:19326-21006	33.615	10.6284	-1.66118	0.000229669	yes	90719	IPR007114:Major facilitator superfamily;;IPR011701:Major facilitator superfamily MFS-1;;IPR016196:MFS general substrate transporter	sp|Q9US44|YIZG_SCHPO Uncharacterized transporter C1002.16c OS=Schizosaccharomyces pombe (strain ATCC 38366 / 972) GN=SPAC1002.16c PE=2 SV=1:217.238	-	KOG2533:Permease of the major facilitator superfamily	transporter activity:GO:0005215;;integral to membrane:GO:0016021;;transport:GO:0006810	20.01.03 C-compound and carbohydrate transport	20.01.23 allantoin and allantoate transport	20.01.25 vitamine/cofactor transport	20.09.18 cellular import	20.09.18.07 non-vesicular cellular import	20.03 transport facilities
estExt_fgenesh1_pm.C_280105	estExt_fgenesh1_pm.C_280105	estExt_fgenesh1_pm.C_280105	scaffold_28:315518-317456	52.0898	16.4664	-1.66147	4.24e-05	yes
estExt_fgenesh1_pg.C_2_t20092	estExt_fgenesh1_pg.C_2_t20092	estExt_fgenesh1_pg.C_2_t20092	scaffold_2:2283207-2285084	275.41	86.9692	-1.663	6.57e-06	yes
[truncated: 341 more rows]
[truncated: 10 more columns]
