# Supplementary material for: RNA Sequencing Reveals Xyr1 as a Transcription Factor Regulating Gene Expression beyond Carbohydrate Metabolism
Source: Hindawi journal article supplement (doi:10.1155/2016/4841756), 2016-01-01
Supplement: f1 [file 4841756.f1.zip › addition files/Table S8. intersection Δxyr1 (lignocellulose)-Rut-C30 (lignocellulose) and Rut-C30 (lignocellulose)-Rut-30 (glucose).xlsx]

## Sheet: Sheet1
Model	gene_id	gene	locus	log2(fold_change(Rut-C30_lignocellulose/Δxyr1_lignocellulose))	log2(fold_change(Rut-C30_lignocellulose/Rut-C30_glucose))	FDR_value	significant	Protein ID a	IPRScan	SPROT	KEGG	KOG	GO	Funcat2
carbonhydrate metabolism genes
e_gw1.24.392.1	e_gw1.24.392.1	e_gw1.24.392.1	scaffold_24:488054-488824	1.79769e+308	10.8293	6.24e-12	yes	88887	IPR008262:Lipase, active site;;IPR000675:Cutinase	sp|Q99034|AXE1_TRIRE Acetylxylan esterase OS=Trichoderma reesei GN=axe1 PE=1 SV=1:312.768	-	-	metabolic process:GO:0008152;;hydrolase activity:GO:0016787;;catalytic activity:GO:0003824	01.05.03 polysaccharide metabolism	16.05 polysaccharide binding
estExt_fgenesh2_kg.C_30102	estExt_fgenesh2_kg.C_30102	estExt_fgenesh2_kg.C_30102	scaffold_3:818061-819609	1.79769e+308	10.7179	1.64e-11	yes	122377	IPR017853:Glycoside hydrolase, catalytic core;;IPR001547:Glycoside hydrolase, family 5;;IPR000254:Cellulose-binding region, fungal	sp|Q2TXJ2|MANA_ASPOR Probable mannan endo-1,4-beta-mannosidase A OS=Aspergillus oryzae (strain ATCC 42149 / RIB 40) GN=manA PE=3 SV=1:444.891	-	-	cellulose binding:GO:0030248;;hydrolase activity, hydrolyzing O-glycosyl compounds:GO:0004553;;carbohydrate metabolic process:GO:0005975;;extracellular region:GO:0005576
estExt_fgenesh1_pg.C_1_t10122	estExt_fgenesh1_pg.C_1_t10122	estExt_fgenesh1_pg.C_1_t10122	scaffold_1:516918-518027	10.4907	10.597	0	yes	139631	IPR008262:Lipase, active site;;IPR000254:Cellulose-binding region, fungal;;IPR000675:Cutinase	sp|Q99034|AXE1_TRIRE Acetylxylan esterase OS=Trichoderma reesei GN=axe1 PE=1 SV=1:610.527	-	-	metabolic process:GO:0008152;;cellulose binding:GO:0030248;;hydrolase activity, hydrolyzing O-glycosyl compounds:GO:0004553;;carbohydrate metabolic process:GO:0005975;;hydrolase activity:GO:0016787;;catalytic activity:GO:0003824;;extracellular region:GO:0005576	01.05.03 polysaccharide metabolism	16.05 polysaccharide binding
estExt_fgenesh2_kg.C_540002	estExt_fgenesh2_kg.C_540002	estExt_fgenesh2_kg.C_540002	scaffold_54:22710-24150	11.0829	10.5864	0	yes	125575	IPR000254:Cellulose-binding region, fungal	sp|P49075|GUX3_AGABI Exoglucanase 3 OS=Agaricus bisporus GN=cel3 PE=1 SV=1:77.411	-	-	cellulose binding:GO:0030248;;hydrolase activity, hydrolyzing O-glycosyl compounds:GO:0004553;;carbohydrate metabolic process:GO:0005975;;extracellular region:GO:0005576
estExt_Genemark1.C_2_t10124	estExt_Genemark1.C_2_t10124	estExt_Genemark1.C_2_t10124	scaffold_2:415654-417264	10.5316	10.2073	0	yes	23616	IPR017853:Glycoside hydrolase, catalytic core;;IPR001000:Glycoside hydrolase, family 10	sp|P23360|XYNA_THEAU Endo-1,4-beta-xylanase OS=Thermoascus aurantiacus GN=XYNA PE=1 SV=4:420.239	-	-	hydrolase activity, hydrolyzing O-glycosyl compounds:GO:0004553;;carbohydrate metabolic process:GO:0005975	01.05.03 polysaccharide metabolism	16.05 polysaccharide binding
estExt_fgenesh2_kg.C_40049	estExt_fgenesh2_kg.C_40049	estExt_fgenesh2_kg.C_40049	scaffold_4:810379-811560	10.063	10.0312	0	yes	122518	IPR008957:Fibronectin, type III-like fold;;IPR005103:Glycoside hydrolase, family 61	sp|Q7Z9M7|GUN7_TRIRE Endoglucanase-7 OS=Trichoderma reesei GN=cel61b PE=1 SV=1:509.99	-	-	-	01.05.02.07 sugar, glucoside, polyol and carboxylate catabolism N.crassa	01.05.03 polysaccharide metabolism	01.25.01 extracellular polysaccharide degradation N.crassa
estExt_fgenesh2_kg.C_1_t10058	estExt_fgenesh2_kg.C_1_t10058	estExt_fgenesh2_kg.C_1_t10058	scaffold_1:519729-520907	10.417	9.2667	0	yes	121449	IPR000254:Cellulose-binding region, fungal	sp|P19355|GUX1_TRIVI Exoglucanase 1 OS=Trichoderma viride GN=cbh1 PE=3 SV=2:85.8853	-	-	cellulose binding:GO:0030248;;hydrolase activity, hydrolyzing O-glycosyl compounds:GO:0004553;;carbohydrate metabolic process:GO:0005975;;extracellular region:GO:0005576
estExt_fgenesh2_kg.C_260030	estExt_fgenesh2_kg.C_260030	estExt_fgenesh2_kg.C_260030	scaffold_26:300331-301211	10.536	9.16533	0	yes	124931	IPR001137:Glycoside hydrolase, family 11;;IPR008985:Concanavalin A-like lectin/glucanase	sp|P36217|XYN2_TRIRE Endo-1,4-beta-xylanase 2 OS=Trichoderma reesei GN=xyn2 PE=1 SV=1:422.55	-	-	hydrolase activity, hydrolyzing O-glycosyl compounds:GO:0004553;;carbohydrate metabolic process:GO:0005975	01.05 C-compound and carbohydrate metabolism	01.05.02.07 sugar, glucoside, polyol and carboxylate catabolism N.crassa	32.10.07 degradation / modification of foreign (exogenous) polysaccharides N.crassa
e_gw1.54.21.1	e_gw1.54.21.1	e_gw1.54.21.1	scaffold_54:26168-27626	10.5903	9.09382	0	yes	93498	IPR017853:Glycoside hydrolase, catalytic core;;IPR001139:Glycoside hydrolase, family 30	sp|Q45070|XYNC1_BACSU Glucuronoxylanase xynC OS=Bacillus subtilis GN=xynC PE=1 SV=1:63.5438	3.2.1.45:Glucosylceramidase.	KOG2566:Beta-glucocerebrosidase	lysosome:GO:0005764;;lysosome organization and biogenesis:GO:0007040;;sphingolipid metabolic process:GO:0006665;;glucosylceramidase activity:GO:0004348
estExt_fgenesh1_pg.C_50028	estExt_fgenesh1_pg.C_50028	estExt_fgenesh1_pg.C_50028	scaffold_5:98718-101150	11.148	9.06561	0	yes	140746	IPR001764:Glycoside hydrolase, family 3, N-terminal;;IPR002772:Glycoside hydrolase, family 3, C-terminal;;IPR017853:Glycoside hydrolase, catalytic core	sp|Q4WRB0|XYND_ASPFU Probable exo-1,4-beta-xylosidase xlnD OS=Neosartorya fumigata (strain ATCC MYA-4609 / Af293 / CBS 101355 / FGSC A1100) GN=xlnD PE=2 SV=1:1124	3.2.1.21:Beta-glucosidase.	-	hydrolase activity, hydrolyzing O-glycosyl compounds:GO:0004553;;carbohydrate metabolic process:GO:0005975;;beta-glucosidase activity:GO:0008422	01.05 C-compound and carbohydrate metabolism	01.05.03 polysaccharide metabolism	42.01 cell wall
fgenesh2_kg.4_#_2_#_AAP57750.1	fgenesh2_kg.4_#_2_#_AAP57750.1	fgenesh2_kg.4_#_2_#_AAP57750.1	scaffold_4:59251-60220	1.79769e+308	8.89707	3.55e-08	yes	118070	IPR005193:Glycoside hydrolase, family 62	sp|Q2U7D2|AXHA_ASPOR Probable alpha-L-arabinofuranosidase axhA OS=Aspergillus oryzae (strain ATCC 42149 / RIB 40) GN=axhA PE=3 SV=1:480.715	-	-	-
e_gw1.3.1006.1	e_gw1.3.1006.1	e_gw1.3.1006.1	scaffold_3:1861288-1862724	10.4187	8.77394	0	yes	72489	IPR017853:Glycoside hydrolase, catalytic core;;IPR001547:Glycoside hydrolase, family 5;;IPR000254:Cellulose-binding region, fungal	sp|P07982|GUN2_TRIRE Endoglucanase EG-II OS=Trichoderma reesei GN=egl2 PE=1 SV=1:845.884	-	-	cellulose binding:GO:0030248;;hydrolase activity, hydrolyzing O-glycosyl compounds:GO:0004553;;carbohydrate metabolic process:GO:0005975;;extracellular region:GO:0005576
gm1.860_g	gm1.860_g	gm1.860_g	scaffold_1:3108857-3110364	9.64332	8.59431	0	yes	5304	IPR001722:Glycoside hydrolase, family 7;;IPR000254:Cellulose-binding region, fungal;;IPR008985:Concanavalin A-like lectin/glucanase	sp|P07981|GUN1_TRIRE Endoglucanase EG-1 OS=Trichoderma reesei GN=egl1 PE=1 SV=1:934.48	-	-	cellulose binding:GO:0030248;;hydrolase activity, hydrolyzing O-glycosyl compounds:GO:0004553;;carbohydrate metabolic process:GO:0005975;;extracellular region:GO:0005576	01.05.03 polysaccharide metabolism
fgenesh1_pm.33_#_16	fgenesh1_pm.33_#_16	fgenesh1_pm.33_#_16	scaffold_33:37305-39735	1.79769e+308	8.4361	0	yes	134448	IPR017853:Glycoside hydrolase, catalytic core;;IPR000322:Glycoside hydrolase, family 31	sp|P31434|XYLS_ECOLI Alpha-xylosidase OS=Escherichia coli (strain K12) GN=yicI PE=1 SV=2:665.996	3.2.1.20:Alpha-glucosidase.	KOG1065:Maltase glucoamylase and related hydrolases, glycosyl hydrolase family 31	hydrolase activity, hydrolyzing O-glycosyl compounds:GO:0004553;;carbohydrate metabolic process:GO:0005975;;alpha-glucosidase activity:GO:0004558
estExt_fgenesh2_kg.C_190032	estExt_fgenesh2_kg.C_190032	estExt_fgenesh2_kg.C_190032	scaffold_19:256723-257402	1.79769e+308	7.71931	0	yes	124438	IPR002594:Glycoside hydrolase, family 12;;IPR008985:Concanavalin A-like lectin/glucanase	sp|P22669|GUN_ASPAC Endoglucanase-1 OS=Aspergillus aculeatus PE=1 SV=1:214.927	-	-	polysaccharide catabolic process:GO:0000272;;cellulase activity:GO:0008810
estExt_fgenesh2_kg.C_30202	estExt_fgenesh2_kg.C_30202	estExt_fgenesh2_kg.C_30202	scaffold_3:1882163-1884078	10.6842	7.59476	0	yes	122470	IPR001524:Glycoside hydrolase, family 6;;IPR016288:1, 4-beta cellobiohydrolase;;IPR000254:Cellulose-binding region, fungal	sp|P07987|GUX2_TRIRE Exoglucanase 2 OS=Trichoderma reesei GN=cbh2 PE=1 SV=1:959.518	-	-	cellulose binding:GO:0030248;;hydrolase activity, hydrolyzing O-glycosyl compounds:GO:0004553;;carbohydrate metabolic process:GO:0005975;;extracellular region:GO:0005576	01.05 C-compound and carbohydrate metabolism	01.05.02.07 sugar, glucoside, polyol and carboxylate catabolism N.crassa	01.05.03 polysaccharide metabolism
e_gw1.30.20.1	e_gw1.30.20.1	e_gw1.30.20.1	scaffold_30:31290-32879	10.4524	7.56059	0	yes	90847	IPR017853:Glycoside hydrolase, catalytic core;;IPR001139:Glycoside hydrolase, family 30	sp|Q45070|XYNC1_BACSU Glucuronoxylanase xynC OS=Bacillus subtilis GN=xynC PE=1 SV=1:68.5514	3.2.1.45:Glucosylceramidase.	KOG2566:Beta-glucocerebrosidase	lysosome:GO:0005764;;lysosome organization and biogenesis:GO:0007040;;sphingolipid metabolic process:GO:0006665;;glucosylceramidase activity:GO:0004348
e_gw1.28.118.1	e_gw1.28.118.1	e_gw1.28.118.1	scaffold_28:174334-176878	1.79769e+308	7.45097	0	yes	90302	IPR005154:Glycoside hydrolase family 67;;IPR017853:Glycoside hydrolase, catalytic core;;IPR011100:Glycosyl hydrolase 67 middle;;IPR011395:Alpha-glucuronidase;;IPR011099:Glycosyl hydrolase 67, C-terminal	sp|Q99024|AGUA_TRIRE Alpha-glucuronidase OS=Trichoderma reesei PE=1 SV=1:1746.1	-	-	alpha-glucuronidase activity:GO:0046559;;xylan catabolic process:GO:0045493;;extracellular region:GO:0005576	01.05.03 polysaccharide metabolism	01.25.01 extracellular polysaccharide degradation N.crassa
estExt_fgenesh2_kg.C_300009	estExt_fgenesh2_kg.C_300009	estExt_fgenesh2_kg.C_300009	scaffold_30:45338-47357	10.8384	7.42565	0	yes	125125	IPR001722:Glycoside hydrolase, family 7;;IPR000254:Cellulose-binding region, fungal;;IPR008985:Concanavalin A-like lectin/glucanase	sp|P62694|GUX1_TRIRE Exoglucanase 1 OS=Trichoderma reesei GN=cbh1 PE=1 SV=1:991.875	-	KOG4562:Uncharacterized conserved protein (tumor-rejection antigen MAGE in humans)	cellulose binding:GO:0030248;;hydrolase activity, hydrolyzing O-glycosyl compounds:GO:0004553;;carbohydrate metabolic process:GO:0005975;;extracellular region:GO:0005576	01.05.03 polysaccharide metabolism
estExt_fgenesh1_pg.C_1_t10124	estExt_fgenesh1_pg.C_1_t10124	estExt_fgenesh1_pg.C_1_t10124	scaffold_1:521457-522808	10.1565	7.06242	0	yes	139633	IPR000254:Cellulose-binding region, fungal;;IPR005103:Glycoside hydrolase, family 61	sp|O14405|GUN4_TRIRE Endoglucanase-4 OS=Trichoderma reesei GN=cel61a PE=1 SV=1:691.804	-	KOG4157:beta-1,6-N-acetylglucosaminyltransferase, contains WSC domain	cellulose binding:GO:0030248;;hydrolase activity, hydrolyzing O-glycosyl compounds:GO:0004553;;carbohydrate metabolic process:GO:0005975;;extracellular region:GO:0005576	01.05.03 polysaccharide metabolism	01.25.01 extracellular polysaccharide degradation N.crassa
estExt_Genewise1.C_11_t20268	estExt_Genewise1.C_11_t20268	estExt_Genewise1.C_11_t20268	scaffold_11:969946-972791	6.34823	6.99009	0	yes	111943	IPR002860:BNR repeat;;IPR000254:Cellulose-binding region, fungal	sp|Q7Z9M8|XG74_TRIRE Xyloglucanase OS=Trichoderma reesei GN=cel74a PE=1 SV=1:1662.51	-	KOG3599:Ca2+-modulated nonselective cation channel polycystin	cellulose binding:GO:0030248;;hydrolase activity, hydrolyzing O-glycosyl compounds:GO:0004553;;carbohydrate metabolic process:GO:0005975;;extracellular region:GO:0005576	01.05.03 polysaccharide metabolism	01.25.01 extracellular polysaccharide degradation N.crassa	32.10.07 degradation / modification of foreign (exogenous) polysaccharides N.crassa	16.05 polysaccharide binding
e_gw1.34.52.1	e_gw1.34.52.1	e_gw1.34.52.1	scaffold_34:81952-83373	1.79769e+308	6.49452	0	yes	91667	IPR011050:Pectin lyase fold/virulence factor;;IPR000743:Glycoside hydrolase, family 28	sp|Q0CGP0|PGLRX_ASPTN Probable exopolygalacturonase X OS=Aspergillus terreus (strain NIH 2624 / FGSC A1156) GN=pgaX PE=3 SV=1:456.062	-	-	carbohydrate metabolic process:GO:0005975;;polygalacturonase activity:GO:0004650	01.05.03 polysaccharide metabolism
fgenesh1_pm.24_#_4	fgenesh1_pm.24_#_4	fgenesh1_pm.24_#_4	scaffold_24:9242-10623	3.07815	6.34477	0.000212701	yes	133383	IPR011050:Pectin lyase fold/virulence factor;;IPR006626:Parallel beta-helix repeat;;IPR000743:Glycoside hydrolase, family 28	sp|A1D145|PGLR_NEOFI Probable endopolygalacturonase NFIA_008150 OS=Neosartorya fischeri (strain ATCC 1020 / DSM 3700 / FGSC A1164 / NRRL 181) GN=NFIA_008150 PE=3 SV=1:543.117	3.2.1.15:Polygalacturonase.	-	carbohydrate metabolic process:GO:0005975;;polygalacturonase activity:GO:0004650	01.05.02.04 sugar, glucoside, polyol and carboxylate anabolism S.cerevisiae	01.05.02.07 sugar, glucoside, polyol and carboxylate catabolism S.cerevisiae	01.05.03 polysaccharide metabolism	32.10.07 degradation / modification of foreign (exogenous) polysaccharides N.crassa	43.01.03.05 budding, cell polarity and filament formation S.cerevisiae
estExt_fgenesh1_pm.C_50031	estExt_fgenesh1_pm.C_50031	estExt_fgenesh1_pm.C_50031	scaffold_5:102432-104802	5.89937	6.21643	0	yes	136547	IPR001764:Glycoside hydrolase, family 3, N-terminal;;IPR002772:Glycoside hydrolase, family 3, C-terminal;;IPR017853:Glycoside hydrolase, catalytic core	sp|B0YB65|BGLL_ASPFC Probable beta-glucosidase L OS=Neosartorya fumigata (strain CEA10 / CBS 144.89 / FGSC A1163) GN=bglL PE=3 SV=1:879.782	3.2.1.21:Beta-glucosidase.	-	hydrolase activity, hydrolyzing O-glycosyl compounds:GO:0004553;;carbohydrate metabolic process:GO:0005975;;beta-glucosidase activity:GO:0008422	01.05.02.07 sugar, glucoside, polyol and carboxylate catabolism N.crassa	01.05.03 polysaccharide metabolism
fgenesh1_pg.24_#_2	fgenesh1_pg.24_#_2	fgenesh1_pg.24_#_2	scaffold_24:3260-4012	1.79769e+308	5.86484	0.000723824	yes	38418	IPR001137:Glycoside hydrolase, family 11;;IPR008985:Concanavalin A-like lectin/glucanase	sp|P36218|XYN1_TRIRE Endo-1,4-beta-xylanase 1 OS=Trichoderma reesei GN=xyn1 PE=1 SV=1:464.922	-	-	hydrolase activity, hydrolyzing O-glycosyl compounds:GO:0004553;;carbohydrate metabolic process:GO:0005975	01.05 C-compound and carbohydrate metabolism	01.05.02.07 sugar, glucoside, polyol and carboxylate catabolism N.crassa	32.10.07 degradation / modification of foreign (exogenous) polysaccharides N.crassa
estExt_Genemark1.C_170165	estExt_Genemark1.C_170165	estExt_Genemark1.C_170165	scaffold_17:633215-634193	9.22161	5.42953	0	yes	25940	IPR000254:Cellulose-binding region, fungal;;IPR009009:Barwin-related endoglucanase;;IPR007112:Expansin 45, endoglucanase-like;;IPR000334:Glycoside hydrolase, family 45	sp|P43317|GUN5_TRIRE Endoglucanase-5 OS=Trichoderma reesei GN=egl5 PE=3 SV=1:478.789	-	-	cellulose binding:GO:0030248;;hydrolase activity, hydrolyzing O-glycosyl compounds:GO:0004553;;carbohydrate metabolic process:GO:0005975;;cellulase activity:GO:0008810;;extracellular region:GO:0005576
estExt_Genewise1Plus.C_300040	estExt_Genewise1Plus.C_300040	estExt_Genewise1Plus.C_300040	scaffold_30:34984-36773	8.73037	5.28584	0	yes	104220	IPR007117:Pollen allergen/expansin, C-terminal;;IPR000254:Cellulose-binding region, fungal;;IPR009009:Barwin-related endoglucanase;;IPR007112:Expansin 45, endoglucanase-like	sp|Q40638|EXPB1_ORYSJ Expansin-B1 OS=Oryza sativa subsp. japonica GN=EXPB1a PE=1 SV=2:64.6994	-	KOG4157:beta-1,6-N-acetylglucosaminyltransferase, contains WSC domain	cellulose binding:GO:0030248;;hydrolase activity, hydrolyzing O-glycosyl compounds:GO:0004553;;carbohydrate metabolic process:GO:0005975;;extracellular region:GO:0005576
e_gw1.1.629.1	e_gw1.1.629.1	e_gw1.1.629.1	scaffold_1:2701281-2703846	5.82358	4.66577	0	yes	67432	IPR017853:Glycoside hydrolase, catalytic core;;IPR006102:Glycoside hydrolase family 2, immunoglobulin-like beta-sandwich;;IPR008979:Galactose-binding like;;IPR006104:Glycoside hydrolase family 2, carbohydrate-binding	sp|Q0CCA0|MANBB_ASPTN Probable beta-mannosidase B OS=Aspergillus terreus (strain NIH 2624 / FGSC A1156) GN=mndB PE=3 SV=2:790.801	3.2.1.25:Beta-mannosidase.	KOG2230:Predicted beta-mannosidase	hydrolase activity, hydrolyzing O-glycosyl compounds:GO:0004553;;carbohydrate metabolic process:GO:0005975;;beta-mannosidase activity:GO:0004567	01.05.03 polysaccharide metabolism
e_gw1.7.292.1	e_gw1.7.292.1	e_gw1.7.292.1	scaffold_7:766335-767997	1.79769e+308	3.47955	5.75e-12	yes	77521	IPR006710:Glycoside hydrolase, family 43	sp|P94489|XYNB_BACSU Beta-xylosidase OS=Bacillus subtilis GN=xynB PE=1 SV=2:446.047	-	-	hydrolase activity, hydrolyzing O-glycosyl compounds:GO:0004553;;carbohydrate metabolic process:GO:0005975	01.05.02.07 sugar, glucoside, polyol and carboxylate catabolism B.subtilis	01.05.03 polysaccharide metabolism
gm1.7136_g	gm1.7136_g	gm1.7136_g	scaffold_22:428207-429647	4.68839	3.09729	6.72e-08	yes	11580	IPR017853:Glycoside hydrolase, catalytic core;;IPR001680:WD40 repeat	sp|Q76FP5|6GAL_TRIVI Endo-beta-1,6-galactanase OS=Trichoderma viride GN=6GAL PE=1 SV=1:896.73	-	-	-
estExt_Genewise1Plus.C_15_t10124	estExt_Genewise1Plus.C_15_t10124	estExt_Genewise1Plus.C_15_t10124	scaffold_15:197136-200659	2.59714	2.85427	2.35e-13	yes	101346	IPR001944:Glycoside hydrolase, family 35;;IPR017853:Glycoside hydrolase, catalytic core	sp|A1D1Z9|BGALA_NEOFI Probable beta-galactosidase A OS=Neosartorya fischeri (strain ATCC 1020 / DSM 3700 / FGSC A1164 / NRRL 181) GN=lacA PE=3 SV=1:1201.04	3.2.1.23:Beta-galactosidase.	KOG0496:Beta-galactosidase	beta-galactosidase activity:GO:0004565;;carbohydrate metabolic process:GO:0005975;;beta-galactosidase complex:GO:0009341	01.05 C-compound and carbohydrate metabolism
estExt_Genewise1Plus.C_19_t20059	estExt_Genewise1Plus.C_19_t20059	estExt_Genewise1Plus.C_19_t20059	scaffold_19:641551-643289	3.19423	2.53846	8.04e-06	yes	102517	IPR015289:Alpha-L-arabinofuranosidase B, catalytic;;IPR007934:Alpha-L-arabinofuranosidase B;;IPR008985:Concanavalin A-like lectin/glucanase	sp|Q92455|ABF1_TRIRE Alpha-N-arabinofuranosidase OS=Trichoderma reesei GN=abf1 PE=2 SV=1:1010.36	-	-	alpha-N-arabinofuranosidase activity:GO:0046556;;L-arabinose metabolic process:GO:0046373	01.05 C-compound and carbohydrate metabolism
estExt_fgenesh2_kg.C_50002	estExt_fgenesh2_kg.C_50002	estExt_fgenesh2_kg.C_50002	scaffold_5:11116-13451	4.9912	2.29586	6.23e-08	yes	122639	IPR001764:Glycoside hydrolase, family 3, N-terminal;;IPR002772:Glycoside hydrolase, family 3, C-terminal;;IPR017853:Glycoside hydrolase, catalytic core;;IPR011658:PA14	sp|Q5B6C7|BGLH_EMENI Probable beta-glucosidase H OS=Emericella nidulans GN=bglH PE=3 SV=2:1036.56	3.2.1.21:Beta-glucosidase.	-	hydrolase activity, hydrolyzing O-glycosyl compounds:GO:0004553;;carbohydrate metabolic process:GO:0005975;;beta-glucosidase activity:GO:0008422	01.05.03 polysaccharide metabolism
e_gw1.7.911.1	e_gw1.7.911.1	e_gw1.7.911.1	scaffold_7:973867-975598	2.52453	1.55336	8.98e-05	yes	77989	IPR017853:Glycoside hydrolase, catalytic core;;IPR001360:Glycoside hydrolase, family 1	sp|Q25BW4|BGL1B_PHACH Beta-glucosidase 1B OS=Phanerochaete chrysosporium GN=BGL1B PE=1 SV=1:495.738	3.2.1.-:Glycosidases, i.e. enzymes hydrolyzing O- and S-glycosyl	KOG0626:Beta-glucosidase, lactase phlorizinhydrolase, and related proteins	hydrolase activity, hydrolyzing O-glycosyl compounds:GO:0004553;;carbohydrate metabolic process:GO:0005975;;glucosidase activity:GO:0015926;;mannosyl-oligosaccharide mannosidase activity:GO:0015924;;galactosidase activity:GO:0015925;;lytic transglycosylase activity:GO:0008933;;amylase activity:GO:0016160;;hexosaminidase activity:GO:0015929;;fucosidase activity:GO:0015928;;trehalase activity:GO:00…	01.05 C-compound and carbohydrate metabolism	01.05.02.04 sugar, glucoside, polyol and carboxylate anabolism L.innocua	01.05.02.07 sugar, glucoside, polyol and carboxylate catabolism N.crassa	01.05.03 polysaccharide metabolism	01.20.01.07 metabolism of glycosides	02.01 glycolysis and gluconeogenesis	32.05.03 defense related proteins
e_gw1.4.1135.1	e_gw1.4.1135.1	e_gw1.4.1135.1	scaffold_4:131898-134523	1.24505	1.07468	0.00486683	yes	74305	IPR001764:Glycoside hydrolase, family 3, N-terminal;;IPR002772:Glycoside hydrolase, family 3, C-terminal;;IPR017853:Glycoside hydrolase, catalytic core	sp|A5ABF5|BGLM_ASPNC Probable beta-glucosidase M OS=Aspergillus niger (strain CBS 513.88 / FGSC A1513) GN=bglM PE=3 SV=1:780.4	3.2.1.21:Beta-glucosidase.	-	hydrolase activity, hydrolyzing O-glycosyl compounds:GO:0004553;;carbohydrate metabolic process:GO:0005975;;beta-glucosidase activity:GO:0008422	01.05.02.07 sugar, glucoside, polyol and carboxylate catabolism N.crassa	01.05.03 polysaccharide metabolism
estExt_Genewise1.C_6_t20284	estExt_Genewise1.C_6_t20284	estExt_Genewise1.C_6_t20284	scaffold_6:869248-872363	-1.18554	2.78877	6.48e-12	yes	109567	IPR001764:Glycoside hydrolase, family 3, N-terminal;;IPR002772:Glycoside hydrolase, family 3, C-terminal;;IPR017853:Glycoside hydrolase, catalytic core	sp|Q4WMU3|BGLF_ASPFU Probable beta-glucosidase F OS=Neosartorya fumigata (strain ATCC MYA-4609 / Af293 / CBS 101355 / FGSC A1100) GN=bglF PE=3 SV=2:1031.17	3.2.1.21:Beta-glucosidase.	-	hydrolase activity, hydrolyzing O-glycosyl compounds:GO:0004553;;carbohydrate metabolic process:GO:0005975;;beta-glucosidase activity:GO:0008422	01.05.02.07 sugar, glucoside, polyol and carboxylate catabolism N.crassa	01.05.03 polysaccharide metabolism
estExt_fgenesh2_kg.C_410009	estExt_fgenesh2_kg.C_410009	estExt_fgenesh2_kg.C_410009	scaffold_41:41159-42459	-1.71506	3.3609	1.79e-07	yes	125426	-	sp|P22222|E13B_CELCE Glucan endo-1,3-beta-glucosidase OS=Cellulosimicrobium cellulans PE=1 SV=1:84.3445	-	-	-	01.05 C-compound and carbohydrate metabolism
estExt_Genemark1.C_100031	estExt_Genemark1.C_100031	estExt_Genemark1.C_100031	scaffold_10:95265-100101	-2.27709	2.48528	7.09e-10	yes	25104	IPR011050:Pectin lyase fold/virulence factor	sp|P49426|EXG1_COCCA Glucan 1,3-beta-glucosidase OS=Cochliobolus carbonum GN=EXG1 PE=1 SV=1:548.51	-	-	-	01.05.03 polysaccharide metabolism	01.25.01 extracellular polysaccharide degradation N.crassa	32.05.05 virulence, disease factors	32.10.07 degradation / modification of foreign (exogenous) polysaccharides N.crassa	42.27 extracellular / secretion proteins
estExt_Genewise1Plus.C_13_t10407	estExt_Genewise1Plus.C_13_t10407	estExt_Genewise1Plus.C_13_t10407	scaffold_13:545031-547841	-1.52054	1.58122	0.00101452	yes	100837	IPR005200:Glycoside hydrolase, family 81	sp|Q09850|ENG2_SCHPO Putative endo-1,3(4)-beta-glucanase 2 OS=Schizosaccharomyces pombe (strain ATCC 38366 / 972) GN=eng2 PE=2 SV=1:521.546	-	KOG2254:Predicted endo-1,3-beta-glucanase	-	01.05 C-compound and carbohydrate metabolism	01.05.03 polysaccharide metabolism	14.10 assembly of protein complexes	40.01 cell growth / morphogenesis	42.04.03 actin cytoskeleton	43.01.03.05 budding, cell polarity and filament formation S.cerevisiae
estExt_fgenesh2_kg.C_30017	estExt_fgenesh2_kg.C_30017	estExt_fgenesh2_kg.C_30017	scaffold_3:68192-70550	-1.59948	1.65794	0.000127653	yes	122299	IPR001382:Glycoside hydrolase, family 47	sp|Q12563|MNS1B_ASPSA Mannosyl-oligosaccharide alpha-1,2-mannosidase 1B OS=Aspergillus saitoi GN=mns1B PE=2 SV=1:527.709	3.2.1.113:Mannosyl-oligosaccharide 1,2-alpha-mannosidase.	KOG2431:1, 2-alpha-mannosidase	calcium ion binding:GO:0005509;;membrane:GO:0016020;;mannosyl-oligosaccharide 1,2-alpha-mannosidase activity:GO:0004571	01.05 C-compound and carbohydrate metabolism	14.07.02 modification with sugar residues (e.g. glycosylation, deglycosylation) N.crassa	14.07.02.02 N-directed glycosylation, deglycosylation S.cerevisiae
Chitinase
estExt_Genewise1Plus.C_1_t20271	estExt_Genewise1Plus.C_1_t20271	estExt_Genewise1Plus.C_1_t20271	scaffold_1:977340-978712	-1.583	4.45124	1.6e-05	yes	94061	IPR017853:Glycoside hydrolase, catalytic core;;IPR001223:Glycoside hydrolase, family 18, catalytic domain;;IPR001579:Glycoside hydrolase, chitinase active site	sp|P29025|CHI1_RHINI Chitinase 1 OS=Rhizopus niveus GN=CHI1 PE=3 SV=1:206.453	3.2.1.14:Chitinase.	KOG4701:Chitinase	endochitinase activity:GO:0008843;;hydrolase activity, hydrolyzing O-glycosyl compounds:GO:0004553;;carbohydrate metabolic process:GO:0005975;;chitinase activity:GO:0004568	01.05.03 polysaccharide metabolism
estExt_fgenesh1_pg.C_170090	estExt_fgenesh1_pg.C_170090	estExt_fgenesh1_pg.C_170090	scaffold_17:362689-363901	-1.60663	3.51735	1.03e-13	yes	142298	IPR017853:Glycoside hydrolase, catalytic core	sp|P29026|CHI1_RHIOL Chitinase 1 OS=Rhizopus oligosporus GN=CHI1 PE=1 SV=1:52.373	-	-	-	01.05 C-compound and carbohydrate metabolism	42.01 cell wall
estExt_fgenesh2_kg.C_210002	estExt_fgenesh2_kg.C_210002	estExt_fgenesh2_kg.C_210002	scaffold_21:33761-35454	-1.52294	2.93857	1.47e-11	yes	124526	IPR015821:Glycoside hydrolase, family 18, N-terminal;;IPR017853:Glycoside hydrolase, catalytic core;;IPR001223:Glycoside hydrolase, family 18, catalytic domain;;IPR001579:Glycoside hydrolase, chitinase active site;;IPR011583:Chitinase II	sp|P48827|CHI4_TRIHA 42 kDa endochitinase OS=Trichoderma harzianum GN=chit42 PE=1 SV=1:707.597	3.2.1.14:Chitinase.	KOG2806:Chitinase	endochitinase activity:GO:0008843;;hydrolase activity, hydrolyzing O-glycosyl compounds:GO:0004553;;carbohydrate metabolic process:GO:0005975;;chitin catabolic process:GO:0006032;;chitinase activity:GO:0004568	01.05.03 polysaccharide metabolism	01.05.09.07 aminosaccharide catabolism
Transporters
e_gw1.33.40.1	e_gw1.33.40.1	e_gw1.33.40.1	scaffold_33:41673-43456	11.1939	10.2772	3.02137e-12	yes	91594	IPR005828:General substrate transporter;;IPR007114:Major facilitator superfamily;;IPR003663:Sugar transporter;;IPR016196:MFS general substrate transporter;;IPR005829:Sugar transporter, conserved site	sp|P38156|MAL31_YEAST Maltose permease MAL31 OS=Saccharomyces cerevisiae (strain ATCC 204508 / S288c) GN=MAL31 PE=1 SV=1:380.178	5.3.1.4:L-arabinose isomerase.	KOG0254:Predicted transporter (major facilitator superfamily)	sugar:hydrogen symporter activity:GO:0005351;;L-arabinose isomerase activity:GO:0008733;;carbohydrate transport:GO:0008643;;transporter activity:GO:0005215;;integral to membrane:GO:0016021;;transport:GO:0006810;;membrane:GO:0016020	01.05 C-compound and carbohydrate metabolism	20.01.03 C-compound and carbohydrate transport	20.01.03.01 sugar transport	20.09.18 cellular import	20.09.18.07 non-vesicular cellular import	20.03 transport facilities	20.03.02.02.01 proton driven symporter
estExt_fgenesh1_pm.C_190177	estExt_fgenesh1_pm.C_190177	estExt_fgenesh1_pm.C_190177	scaffold_19:569288-571762	10.2131	6.99187	0	yes	138519	IPR005828:General substrate transporter;;IPR007114:Major facilitator superfamily;;IPR003663:Sugar transporter;;IPR016196:MFS general substrate transporter;;IPR005829:Sugar transporter, conserved site	sp|Q4U3U6|QAY_NEUAF Quinate permease OS=Neurospora africana GN=qa-y PE=3 SV=1:270.396	5.3.1.4:L-arabinose isomerase.	KOG0254:Predicted transporter (major facilitator superfamily)	sugar:hydrogen symporter activity:GO:0005351;;L-arabinose isomerase activity:GO:0008733;;carbohydrate transport:GO:0008643;;transporter activity:GO:0005215;;integral to membrane:GO:0016021;;transport:GO:0006810;;membrane:GO:0016020	20.01.03 C-compound and carbohydrate transport	20.09.18.07 non-vesicular cellular import
estExt_Genewise1Plus.C_5_t10017	estExt_Genewise1Plus.C_5_t10017	estExt_Genewise1Plus.C_5_t10017	scaffold_5:14664-16575	6.24267	4.32426	0	yes	97259	IPR005828:General substrate transporter;;IPR007114:Major facilitator superfamily;;IPR003663:Sugar transporter;;IPR016196:MFS general substrate transporter	sp|P49374|HGT1_KLULA High-affinity glucose transporter OS=Kluyveromyces lactis (strain ATCC 8585 / CBS 2359 / DSM 70799 / NBRC 1267 / NRRL Y-1140 / WM37) GN=HGT1 PE=3 SV=1:176.022	5.3.1.4:L-arabinose isomerase.	KOG0254:Predicted transporter (major facilitator superfamily)	sugar:hydrogen symporter activity:GO:0005351;;L-arabinose isomerase activity:GO:0008733;;carbohydrate transport:GO:0008643;;transporter activity:GO:0005215;;integral to membrane:GO:0016021;;transport:GO:0006810;;membrane:GO:0016020	20.01.03 C-compound and carbohydrate transport	20.09.18 cellular import	20.09.18.07 non-vesicular cellular import	20.03 transport facilities
fgenesh1_pm.3_#_569	fgenesh1_pm.3_#_569	fgenesh1_pm.3_#_569	scaffold_3:1831840-1833598	5.67591	5.02427	0	yes	127980	IPR005828:General substrate transporter;;IPR007114:Major facilitator superfamily;;IPR003663:Sugar transporter;;IPR016196:MFS general substrate transporter	sp|P07921|LACP_KLULA Lactose permease OS=Kluyveromyces lactis (strain ATCC 8585 / CBS 2359 / DSM 70799 / NBRC 1267 / NRRL Y-1140 / WM37) GN=LAC12 PE=3 SV=1:299.671	-	KOG0254:Predicted transporter (major facilitator superfamily)	sugar:hydrogen symporter activity:GO:0005351;;carbohydrate transport:GO:0008643;;transporter activity:GO:0005215;;integral to membrane:GO:0016021;;transport:GO:0006810;;membrane:GO:0016020
fgenesh1_pg.3_#_508	fgenesh1_pg.3_#_508	fgenesh1_pg.3_#_508	scaffold_3:1826016-1828000	3.89831	7.72711	0	yes	33630	IPR005828:General substrate transporter;;IPR007114:Major facilitator superfamily;;IPR003663:Sugar transporter;;IPR016196:MFS general substrate transporter;;IPR005829:Sugar transporter, conserved site	sp|P49374|HGT1_KLULA High-affinity glucose transporter OS=Kluyveromyces lactis (strain ATCC 8585 / CBS 2359 / DSM 70799 / NBRC 1267 / NRRL Y-1140 / WM37) GN=HGT1 PE=3 SV=1:480.33	5.3.1.4:L-arabinose isomerase.	KOG0254:Predicted transporter (major facilitator superfamily)	sugar:hydrogen symporter activity:GO:0005351;;L-arabinose isomerase activity:GO:0008733;;carbohydrate transport:GO:0008643;;transporter activity:GO:0005215;;integral to membrane:GO:0016021;;transport:GO:0006810;;membrane:GO:0016020	20.01.03 C-compound and carbohydrate transport	20.09.18.07 non-vesicular cellular import
estExt_Genemark1.C_390038	estExt_Genemark1.C_390038	estExt_Genemark1.C_390038	scaffold_39:127091-128961	3.00978	5.03385	1.07705e-10	yes	26932	IPR005828:General substrate transporter;;IPR007114:Major facilitator superfamily;;IPR003663:Sugar transporter;;IPR016196:MFS general substrate transporter	sp|P39932|STL1_YEAST Sugar transporter STL1 OS=Saccharomyces cerevisiae (strain ATCC 204508 / S288c) GN=STL1 PE=1 SV=2:208.379	5.3.1.4:L-arabinose isomerase.	KOG0254:Predicted transporter (major facilitator superfamily)	sugar:hydrogen symporter activity:GO:0005351;;L-arabinose isomerase activity:GO:0008733;;carbohydrate transport:GO:0008643;;transporter activity:GO:0005215;;integral to membrane:GO:0016021;;transport:GO:0006810;;membrane:GO:0016020	01.05 C-compound and carbohydrate metabolism	01.05.25 regulation of C-compound and carbohydrate metabolism N.crassa	20.01.03 C-compound and carbohydrate transport	20.09.18 cellular import	20.09.18.07 non-vesicular cellular import	34.11.12 perception of nutrients and nutritional adaptation N.crassa	20.03 transport facilities
fgenesh1_pg.34_#_48	fgenesh1_pg.34_#_48	fgenesh1_pg.34_#_48	scaffold_34:162879-164184	2.93174	1.89489	4.25195e-06	yes	39450	IPR007114:Major facilitator superfamily;;IPR011701:Major facilitator superfamily MFS-1;;IPR016196:MFS general substrate transporter	sp|Q08777|MCH5_YEAST Riboflavin transporter MCH5 OS=Saccharomyces cerevisiae (strain ATCC 204508 / S288c) GN=MCH5 PE=1 SV=1:144.821	-	KOG2504:Monocarboxylate transporter	transporter activity:GO:0005215;;integral to membrane:GO:0016021;;transport:GO:0006810	20.01.03 C-compound and carbohydrate transport	20.09.18.07 non-vesicular cellular import	20.03 transport facilities
estExt_Genewise1Plus.C_14_t20043	estExt_Genewise1Plus.C_14_t20043	estExt_Genewise1Plus.C_14_t20043	scaffold_14:698569-700828	2.06382	3.96122	9.47192e-08	yes	101246	IPR005828:General substrate transporter;;IPR007114:Major facilitator superfamily;;IPR003663:Sugar transporter;;IPR016196:MFS general substrate transporter;;IPR005829:Sugar transporter, conserved site	sp|Q9XIH7|PLT1_ARATH Putative polyol transporter 1 OS=Arabidopsis thaliana GN=PLT1 PE=2 SV=1:187.963	5.3.1.4:L-arabinose isomerase.	KOG0254:Predicted transporter (major facilitator superfamily)	sugar:hydrogen symporter activity:GO:0005351;;L-arabinose isomerase activity:GO:0008733;;carbohydrate transport:GO:0008643;;transporter activity:GO:0005215;;integral to membrane:GO:0016021;;transport:GO:0006810;;membrane:GO:0016020	01.05 C-compound and carbohydrate metabolism	01.06 lipid, fatty acid and isoprenoid metabolism N.crassa	20.01.03 C-compound and carbohydrate transport	20.01.13 lipid/fatty acid transport	20.09.16 cellular export and secretion	20.09.18 cellular import	20.09.18.07 non-vesicular cellular import	20.03 transport facilities
fgenesh1_pm.7_#_187	fgenesh1_pm.7_#_187	fgenesh1_pm.7_#_187	scaffold_7:604696-605715	2.04517	2.12271	2.91613e-05	yes	129514	IPR000425:Major intrinsic protein	sp|P0CD92|AQY1_YEASX Aquaporin-1 OS=Saccharomyces cerevisiae GN=AQY1 PE=2 SV=1:164.466	-	KOG0223:Aquaporin (major intrinsic protein family)	transporter activity:GO:0005215;;transport:GO:0006810;;membrane:GO:0016020	20.09.18.07 non-vesicular cellular import	20.03 transport facilities	20.03.01 channel / pore class transport	20.03.01.01 ion channels
estExt_Genewise1Plus.C_7_t20161	estExt_Genewise1Plus.C_7_t20161	estExt_Genewise1Plus.C_7_t20161	scaffold_7:822494-824456	1.9745	-1.50391	0.00060038	yes	98410	IPR005828:General substrate transporter;;IPR007114:Major facilitator superfamily;;IPR004738:Phosphate permease;;IPR016196:MFS general substrate transporter;;IPR005829:Sugar transporter, conserved site	sp|P25297|PHO84_YEAST Inorganic phosphate transporter PHO84 OS=Saccharomyces cerevisiae (strain ATCC 204508 / S288c) GN=PHO84 PE=1 SV=2:594.349	-	KOG0252:Inorganic phosphate transporter	phosphate transport:GO:0006817;;transporter activity:GO:0005215;;inorganic phosphate transmembrane transporter activity:GO:0005315;;integral to membrane:GO:0016021;;transport:GO:0006810;;membrane:GO:0016020	01.04 phosphate metabolism	20.01.01.01.01 heavy metal ion transport (Cu+, Fe3+, etc.) S.cerevisiae	20.01.01.07 anion transport	20.01.01.07.07 phosphate transport	20.01.03 C-compound and carbohydrate transport	20.09.18 cellular import	34.01.01.03 homeostasis of protons	34.01.03.03 homeostasis of phosphate	20.03 transport facilities
gm1.3367_g	gm1.3367_g	gm1.3367_g	scaffold_6:1047668-1050084	1.48462	1.53436	0.000164876	yes	7811	IPR005828:General substrate transporter;;IPR007114:Major facilitator superfamily;;IPR003663:Sugar transporter;;IPR016196:MFS general substrate transporter;;IPR005829:Sugar transporter, conserved site	sp|A2QQV6|QUTD_ASPNC Probable quinate permease OS=Aspergillus niger (strain CBS 513.88 / FGSC A1513) GN=qutD PE=3 SV=1:309.686	5.3.1.4:L-arabinose isomerase.	KOG0254:Predicted transporter (major facilitator superfamily)	sugar:hydrogen symporter activity:GO:0005351;;L-arabinose isomerase activity:GO:0008733;;carbohydrate transport:GO:0008643;;transporter activity:GO:0005215;;integral to membrane:GO:0016021;;transport:GO:0006810;;membrane:GO:0016020	01.05.25 regulation of C-compound and carbohydrate metabolism N.crassa	20.01.03 C-compound and carbohydrate transport	20.09.18 cellular import	20.09.18.07 non-vesicular cellular import	34.11.12 perception of nutrients and nutritional adaptation N.crassa	20.03 transport facilities
estExt_Genewise1Plus.C_1_t60435	estExt_Genewise1Plus.C_1_t60435	estExt_Genewise1Plus.C_1_t60435	scaffold_1:3570857-3573106	1.41017	1.2663	0.00145748	yes	95062	IPR005828:General substrate transporter;;IPR007114:Major facilitator superfamily;;IPR003663:Sugar transporter;;IPR016196:MFS general substrate transporter;;IPR005829:Sugar transporter, conserved site	sp|P53387|KHT2_KLULA Hexose transporter 2 OS=Kluyveromyces lactis (strain ATCC 8585 / CBS 2359 / DSM 70799 / NBRC 1267 / NRRL Y-1140 / WM37) GN=KHT2 PE=3 SV=1:435.647	5.3.1.4:L-arabinose isomerase.	KOG0254:Predicted transporter (major facilitator superfamily)	sugar:hydrogen symporter activity:GO:0005351;;L-arabinose isomerase activity:GO:0008733;;carbohydrate transport:GO:0008643;;transporter activity:GO:0005215;;integral to membrane:GO:0016021;;transport:GO:0006810;;membrane:GO:0016020	01.05 C-compound and carbohydrate metabolism	01.05.25 regulation of C-compound and carbohydrate metabolism N.crassa	20.01.03 C-compound and carbohydrate transport	20.01.03.01 sugar transport	20.01.13 lipid/fatty acid transport	20.09.16 cellular export and secretion	20.09.18 cellular import	20.09.18.07 non-vesicular cellular import	34.11.12 perception of nutrients and nutritional adaptation N.crassa	20.03 transport facilities
estExt_fgenesh1_pm.C_130181	estExt_fgenesh1_pm.C_130181	estExt_fgenesh1_pm.C_130181	scaffold_13:633759-635726	-1.14033	-1.11139	0.00646488	yes	137900	IPR001046:Natural resistance-associated macrophage protein	sp|P38925|SMF1_YEAST Manganese transporter SMF1 OS=Saccharomyces cerevisiae (strain ATCC 204508 / S288c) GN=SMF1 PE=1 SV=2:506.908	-	KOG1291:Mn2+ and Fe2+ transporters of the NRAMP family	transporter activity:GO:0005215;;transport:GO:0006810;;membrane:GO:0016020	10.03.01 mitotic cell cycle and cell cycle control N.crassa	14.04 protein targeting, sorting and translocation S.cerevisiae	20.01.01.01.01 heavy metal ion transport (Cu+, Fe3+, etc.) N.crassa	20.09.04 mitochondrial transport	20.09.18 cellular import	20.09.18.07 non-vesicular cellular import	34.01.01.01 homeostasis of metal ions (Na, K, Ca etc.) N.crassa
estExt_fgenesh1_pm.C_400037	estExt_fgenesh1_pm.C_400037	estExt_fgenesh1_pm.C_400037	scaffold_40:106843-109333	-1.27225	1.89489	0.00185129	yes	139450	IPR002293:Amino acid/polyamine transporter I;;IPR004841:Amino acid permease-associated region	sp|P53388|DIP5_YEAST Dicarboxylic amino acid permease OS=Saccharomyces cerevisiae (strain ATCC 204508 / S288c) GN=DIP5 PE=1 SV=1:550.821	-	KOG1286:Amino acid transporters	amino acid transmembrane transporter activity:GO:0015171;;transport:GO:0006810;;membrane:GO:0016020;;amino acid transport:GO:0006865	20.01.07 amino acid/amino acid derivatives transport S.cerevisiae	20.09.18.07 non-vesicular cellular import
estExt_Genewise1.C_7_t10106	estExt_Genewise1.C_7_t10106	estExt_Genewise1.C_7_t10106	scaffold_7:115889-120654	-1.58907	-2.75357	0.000254576	yes	109810	IPR003593:AAA+ ATPase, core;;IPR010929:CDR ABC transporter;;IPR013525:ABC-2 type transporter;;IPR003439:ABC transporter-like	sp|O74676|CDR4_CANAL ABC transporter CDR4 OS=Candida albicans GN=CDR4 PE=3 SV=1:1495.72	-	KOG0065:Pleiotropic drug resistance proteins (PDR1-15), ABC superfamily	nucleoside-triphosphatase activity:GO:0017111;;ATP binding:GO:0005524;;integral to membrane:GO:0016021;;transport:GO:0006810;;ATPase activity:GO:0016887;;ATPase activity, coupled to transmembrane movement of substances:GO:0042626;;nucleotide binding:GO:0000166	01.04 phosphate metabolism	01.05 C-compound and carbohydrate metabolism	20.01.01.01 cation transport (H+, Na+, K+, Ca2+ , NH4+, etc.) S.cerevisiae	20.01.03 C-compound and carbohydrate transport	20.01.13 lipid/fatty acid transport	20.01.27 drug/toxin transport	20.09.16.01 Type I protein secretion system (ABC-type transport systems) N.crassa	32.01.01 oxidative stress response	32.05.01.03 chemical agent resistance	32.07 detoxification	32.07.05 detoxification by export	34.01.01.01 homeostasis of metal ions (Na, K, Ca etc.) S.cerevisiae	16.19.03 ATP binding	20.03.22 transport ATPases	20.03.25 ABC transporters
gm1.7978_g	gm1.7978_g	gm1.7978_g	scaffold_29:318087-321159	-1.72474	-2.75357	2.4766e-06	yes	12422	IPR007114:Major facilitator superfamily;;IPR011701:Major facilitator superfamily MFS-1;;IPR016196:MFS general substrate transporter	sp|O94343|YHMA_SCHPO Uncharacterized MFS-type transporter C1271.10c OS=Schizosaccharomyces pombe (strain ATCC 38366 / 972) GN=SPBC1271.10c PE=1 SV=1:114.39;;sp|O94343|YHMA_SCHPO Uncharacterized MFS-type transporter C1271.10c OS=Schizosaccharomyces pombe (strain ATCC 38366 / 972) GN=SPBC1271.10c PE=1 SV=1:88.9669	-	KOG0255:Synaptic vesicle transporter SVOP and related transporters (major facilitator superfamily)	transporter activity:GO:0005215;;integral to membrane:GO:0016021;;transport:GO:0006810	20.01.27 drug/toxin transport	20.03 transport facilities
e_gw1.7.830.1	e_gw1.7.830.1	e_gw1.7.830.1	scaffold_7:571646-572451	-1.80201	2.15354	9.16172e-05	yes	77893	IPR000791:GPR1/FUN34/yaaH	sp|P32907|ATO2_YEAST Ammonia transport outward protein 2 OS=Saccharomyces cerevisiae (strain ATCC 204508 / S288c) GN=ATO2 PE=1 SV=1:120.553	-	-	membrane:GO:0016020	01.02 nitrogen, sulfur and selenium metabolism S.cerevisiae	01.03.16.03 DNA degradation	01.05.25 regulation of C-compound and carbohydrate metabolism S.cerevisiae	10.01 DNA processing	10.03.02 meiosis	20.01.01.01 cation transport (H+, Na+, K+, Ca2+ , NH4+, etc.) S.cerevisiae	20.01.03 C-compound and carbohydrate transport	20.03 transport facilities	20.03.02.03.01 proton driven antiporter
estExt_Genewise1Plus.C_7_t20167	estExt_Genewise1Plus.C_7_t20167	estExt_Genewise1Plus.C_7_t20167	scaffold_7:832780-835898	-1.89006	-1.20064	7.93961e-07	yes	98413	IPR006153:Sodium/hydrogen exchanger	sp|Q9P7I1|KHA1_SCHPO K(+)/H(+) antiporter 1 OS=Schizosaccharomyces pombe (strain ATCC 38366 / 972) GN=kha1 PE=2 SV=1:447.588	-	KOG1650:Predicted K+/H+-antiporter	solute:hydrogen antiporter activity:GO:0015299;;regulation of pH:GO:0006885;;integral to membrane:GO:0016021	20.01.01.01 cation transport (H+, Na+, K+, Ca2+ , NH4+, etc.) N.crassa	34.01.01.01 homeostasis of metal ions (Na, K, Ca etc.) N.crassa	34.01.01.03 homeostasis of protons
estExt_Genewise1Plus.C_390082	estExt_Genewise1Plus.C_390082	estExt_Genewise1Plus.C_390082	scaffold_39:83896-88507	-2.01926	-1.44642	4.09183e-08	yes	104881	IPR003593:AAA+ ATPase, core;;IPR010929:CDR ABC transporter;;IPR013525:ABC-2 type transporter;;IPR003439:ABC transporter-like	sp|P41820|BFR1_SCHPO Brefeldin A resistance protein OS=Schizosaccharomyces pombe (strain ATCC 38366 / 972) GN=bfr1 PE=1 SV=1:1140.95	-	KOG0065:Pleiotropic drug resistance proteins (PDR1-15), ABC superfamily	nucleoside-triphosphatase activity:GO:0017111;;ATP binding:GO:0005524;;integral to membrane:GO:0016021;;transport:GO:0006810;;ATPase activity:GO:0016887;;ATPase activity, coupled to transmembrane movement of substances:GO:0042626;;nucleotide binding:GO:0000166	01.04 phosphate metabolism	01.05 C-compound and carbohydrate metabolism	20.01.01.01 cation transport (H+, Na+, K+, Ca2+ , NH4+, etc.) S.cerevisiae	20.01.03 C-compound and carbohydrate transport	20.01.13 lipid/fatty acid transport	20.01.27 drug/toxin transport	20.09.16.01 Type I protein secretion system (ABC-type transport systems) N.crassa	32.01.01 oxidative stress response	32.05.01.03 chemical agent resistance	32.07 detoxification	32.07.05 detoxification by export	34.01.01.01 homeostasis of metal ions (Na, K, Ca etc.) S.cerevisiae	16.19.03 ATP binding	20.03.22 transport ATPases	20.03.25 ABC transporters
e_gw1.4.746.1	e_gw1.4.746.1	e_gw1.4.746.1	scaffold_4:124855-126950	-2.06817	4.38766	5.47934e-09	yes	74437	IPR005828:General substrate transporter;;IPR007114:Major facilitator superfamily;;IPR003663:Sugar transporter;;IPR016196:MFS general substrate transporter;;IPR005829:Sugar transporter, conserved site	sp|Q9XIH7|PLT1_ARATH Putative polyol transporter 1 OS=Arabidopsis thaliana GN=PLT1 PE=2 SV=1:196.052	5.3.1.4:L-arabinose isomerase.	KOG0254:Predicted transporter (major facilitator superfamily)	sugar:hydrogen symporter activity:GO:0005351;;L-arabinose isomerase activity:GO:0008733;;carbohydrate transport:GO:0008643;;transporter activity:GO:0005215;;integral to membrane:GO:0016021;;transport:GO:0006810;;membrane:GO:0016020	01.05 C-compound and carbohydrate metabolism	01.06 lipid, fatty acid and isoprenoid metabolism N.crassa	20.01.03 C-compound and carbohydrate transport	20.01.13 lipid/fatty acid transport	20.09.16 cellular export and secretion	20.09.18 cellular import	20.09.18.07 non-vesicular cellular import	20.03 transport facilities
estExt_Genewise1.C_330194	estExt_Genewise1.C_330194	estExt_Genewise1.C_330194	scaffold_33:212851-217715	-2.20183	-2.85009	3.11383e-09	yes	116127	IPR004827:Basic-leucine zipper (bZIP) transcription factor;;IPR003593:AAA+ ATPase, core;;IPR010929:CDR ABC transporter;;IPR013525:ABC-2 type transporter;;IPR003439:ABC transporter-like	sp|O74208|PDH1_CANGA ATP-binding cassette transporter CGR1 OS=Candida glabrata (strain ATCC 2001 / CBS 138 / JCM 3761 / NBRC 0622 / NRRL Y-65) GN=PDH1 PE=3 SV=3:1317.75	-	KOG0065:Pleiotropic drug resistance proteins (PDR1-15), ABC superfamily	regulation of transcription, DNA-dependent:GO:0006355;;nucleus:GO:0005634;;nucleoside-triphosphatase activity:GO:0017111;;integral to membrane:GO:0016021;;ATPase activity, coupled to transmembrane movement of substances:GO:0042626;;transcription factor activity:GO:0003700;;nucleotide binding:GO:0000166;;sequence-specific DNA binding:GO:0043565;;ATP binding:GO:0005524;;transport:GO:0006810;;ATPase…	01.04 phosphate metabolism	01.05 C-compound and carbohydrate metabolism	20.01.01.01 cation transport (H+, Na+, K+, Ca2+ , NH4+, etc.) S.cerevisiae	20.01.03 C-compound and carbohydrate transport	20.01.13 lipid/fatty acid transport	20.01.27 drug/toxin transport	20.09.16.01 Type I protein secretion system (ABC-type transport systems) N.crassa	32.01.01 oxidative stress response	32.05.01.03 chemical agent resistance	32.07 detoxification	32.07.05 detoxification by export	34.01.01.01 homeostasis of metal ions (Na, K, Ca etc.) S.cerevisiae	16.19.03 ATP binding	20.03.22 transport ATPases	20.03.25 ABC transporters
peptidase
estExt_Genewise1Plus.C_350017	estExt_Genewise1Plus.C_350017	estExt_Genewise1Plus.C_350017	scaffold_35:23877-25343	-1.24009	8.45458	5.35e-14	yes	104564	IPR001969:Peptidase aspartic, active site;;IPR001461:Peptidase A1;;IPR009007:Peptidase aspartic, catalytic	sp|O13340|CARP_PODAN Podosporapepsin OS=Podospora anserina GN=PAPA PE=2 SV=1:297.36	3.4.23.18:Aspergillopepsin I.	KOG1339:Aspartyl protease	aspartic-type endopeptidase activity:GO:0004190;;pepsin A activity:GO:0004194;;proteolysis:GO:0006508	01.25.03 extracellular protein degradation	14.13 protein/peptide degradation	14.13.04 lysosomal and vacuolar protein degradation N.crassa	42.27 extracellular / secretion proteins
estExt_Genewise1.C_1_t20224	estExt_Genewise1.C_1_t20224	estExt_Genewise1.C_1_t20224	scaffold_1:921400-924287	-1.32862	-1.74066	1.78e-06	yes	105633	IPR001762:Blood coagulation inhibitor, Disintegrin;;IPR006586:ADAM, cysteine-rich;;IPR001590:Peptidase M12B, ADAM/reprolysin	sp|Q4WQ08|ADMB_ASPFU Disintegrin and metalloproteinase domain-containing protein B OS=Neosartorya fumigata (strain ATCC MYA-4609 / Af293 / CBS 101355 / FGSC A1100) GN=ADM-B PE=3 SV=2:674.855	3.4.24.-:Metalloendopeptidases.	KOG3607:Meltrins, fertilins and related Zn-dependent metalloproteinases of the ADAMs family	collagenase activity:GO:0008133;;prenyl protein specific endopeptidase activity:GO:0008319;;stromelysin 3 activity:GO:0004249;;proteolysis:GO:0006508;;matrilysin-2 activity:GO:0030402;;metalloendopeptidase activity:GO:0004222
e_gw1.18.76.1	e_gw1.18.76.1	e_gw1.18.76.1	scaffold_18:94012-95563	-1.39165	-1.67815	4.89e-06	yes	86187	IPR000834:Peptidase M14, carboxypeptidase A;;IPR009020:Proteinase inhibitor, propeptide	sp|C5FPR9|Y4493_ARTOC Putative metallocarboxypeptidase MCYG_04493 OS=Arthroderma otae (strain CBS 113480) GN=MCYG_04493 PE=3 SV=1:436.417	-	KOG2650:Zinc carboxypeptidase	zinc ion binding:GO:0008270;;carboxypeptidase A activity:GO:0004182;;proteolysis:GO:0006508	42.01 cell wall
estExt_Genewise1Plus.C_2_t10302	estExt_Genewise1Plus.C_2_t10302	estExt_Genewise1Plus.C_2_t10302	scaffold_2:317664-319961	-1.46008	-1.30513	0.000328054	yes	95233	IPR002931:Transglutaminase-like	sp|Q8C8H8|KY_MOUSE Kyphoscoliosis peptidase OS=Mus musculus GN=Ky PE=1 SV=1:85.5001	-	KOG3671:Actin regulatory protein (Wiskott-Aldrich syndrome protein)	-
fgenesh1_pg.7_#_46	fgenesh1_pg.7_#_46	fgenesh1_pg.7_#_46	scaffold_7:170975-172666	-1.73219	-1.71872	0.000530197	yes	34878	IPR001563:Peptidase S10, serine carboxypeptidase	sp|C5P212|CBPYA_COCP7 Carboxypeptidase Y homolog A OS=Coccidioides posadasii (strain C735) GN=cpyA PE=3 SV=1:210.69	3.4.16.-:Serine-type carboxypeptidases.	KOG1282:Serine carboxypeptidases (lysosomal cathepsin A)	proteolysis:GO:0006508;;serine carboxypeptidase activity:GO:0004185	14.13.01 cytoplasmic and nuclear protein degradation S.cerevisiae	14.13.04.02 vacuolar protein degradation
Alcohol dehydrogenase
fgenesh1_pm.27_#_13	fgenesh1_pm.27_#_13	fgenesh1_pm.27_#_13	scaffold_27:55661-56966	-1.86486	1.95282	8.63e-05	yes	133809	IPR002328:Alcohol dehydrogenase, zinc-containing, conserved site;;IPR016040:NAD(P)-binding;;IPR013154:Alcohol dehydrogenase GroES-like;;IPR013149:Alcohol dehydrogenase, zinc-binding;;IPR011032:GroES-like	sp|O94038|ADH2_CANAL Alcohol dehydrogenase 2 OS=Candida albicans GN=ADH2 PE=1 SV=1:262.692	1.1.1.1:Alcohol dehydrogenase.	KOG0023:Alcohol dehydrogenase, class V	alcohol dehydrogenase activity, iron-dependent:GO:0004025;;alcohol dehydrogenase activity, metal ion-independent:GO:0004023;;alcohol dehydrogenase activity:GO:0004022;;zinc ion binding:GO:0008270;;metabolic process:GO:0008152;;catalytic activity:GO:0003824;;oxidoreductase activity:GO:0016491;;binding:GO:0005488;;alcohol dehydrogenase activity, zinc-dependent:GO:0004024	01.05 C-compound and carbohydrate metabolism	01.05.06.07 C-2 compound and organic acid catabolism S.cerevisiae	01.06 lipid, fatty acid and isoprenoid metabolism N.crassa	02.01 glycolysis and gluconeogenesis	02.16 fermentation	02.16.01 alcohol fermentation	32.07 detoxification	16.17.09 heavy metal binding (Cu, Fe, Zn)
Heatshock protein
None
