# Supplementary material for: RNA Sequencing Reveals Xyr1 as a Transcription Factor Regulating Gene Expression beyond Carbohydrate Metabolism
Source: Hindawi journal article supplement (doi:10.1155/2016/4841756), 2016-01-01
Supplement: f1 [file 4841756.f1.zip › addition files/Table S9. Δxyr1 (lignocellulose)-and-Δxyr1 (glucose)-DE.tbl-Funcation.xlsx]

## Sheet: C11-and-G11-DE.tbl-Funcation
Model	gene_id	gene	locus	FPKM_Δxyr1 (lignocellulose)	FPKM_Δxyr1(glucose)	log2(fold_change(Δxyr1_glucose/Δxyr1_lignocellulose))	FPR_value	significant	Protein ID	IPRScan	SPROT	KEGG	KOG	GO	Funcat2
fgenesh1_pm.27_#_13	fgenesh1_pm.27_#_13	fgenesh1_pm.27_#_13	scaffold_27:55661-56966	98.1322	0	-1.79769e+308	0.00695304	yes	133809	IPR002328:Alcohol dehydrogenase, zinc-containing, conserved site;;IPR016040:NAD(P)-binding;;IPR013154:Alcohol dehydrogenase GroES-like;;IPR013149:Alcohol dehydrogenase, zinc-binding;;IPR011032:GroES-like	sp|O94038|ADH2_CANAL Alcohol dehydrogenase 2 OS=Candida albicans GN=ADH2 PE=1 SV=1:262.692	1.1.1.1:Alcohol dehydrogenase.	KOG0023:Alcohol dehydrogenase, class V	alcohol dehydrogenase activity, iron-dependent:GO:0004025;;alcohol dehydrogenase activity, metal ion-independent:GO:0004023;;alcohol dehydrogenase activity:GO:0004022;;zinc ion binding:GO:0008270;;metabolic process:GO:0008152;;catalytic activity:GO:0003824;;oxidoreductase activity:GO:0016491;;binding:GO:0005488;;alcohol dehydrogenase activity, zinc-dependent:GO:0004024	01.05 C-compound and carbohydrate metabolism	01.05.06.07 C-2 compound and organic acid catabolism S.cerevisiae	01.06 lipid, fatty acid and isoprenoid metabolism N.crassa	02.01 glycolysis and gluconeogenesis	02.16 fermentation	02.16.01 alcohol fermentation	32.07 detoxification	16.17.09 heavy metal binding (Cu, Fe, Zn)
gm1.8554_g	gm1.8554_g	gm1.8554_g	scaffold_39:33320-34130	287.554	0	-1.79769e+308	0.00678538	yes	12998	-	-	-	KOG3158:HSP90 co-chaperone p23	-
estExt_fgenesh1_pm.C_300010	estExt_fgenesh1_pm.C_300010	estExt_fgenesh1_pm.C_300010	scaffold_30:25666-26620	0.716557	1410.43	10.9428	0	yes	139174	IPR007274:Ctr copper transporter	sp|O94722|CTR4_SCHPO Copper transport protein ctr4 OS=Schizosaccharomyces pombe (strain ATCC 38366 / 972) GN=ctr4 PE=1 SV=1:101.679	-	KOG3386:Copper transporter	copper ion transport:GO:0006825;;integral to membrane:GO:0016021;;copper ion transmembrane transporter activity:GO:0005375
estExt_Genewise1Plus.C_18_t10477	estExt_Genewise1Plus.C_18_t10477	estExt_Genewise1Plus.C_18_t10477	scaffold_18:614295-615118	2.82114	1395.75	8.95054	0	yes
e_gw1.30.193.1	e_gw1.30.193.1	e_gw1.30.193.1	scaffold_30:27158-29114	0.592556	162.749	8.10149	0	yes	90882	IPR013121:Ferric reductase, NAD binding;;IPR013130:Ferric reductase-like transmembrane component, N-terminal;;IPR013112:FAD-binding 8	sp|Q08905|FRE3_YEAST Ferric reductase transmembrane component 3 OS=Saccharomyces cerevisiae (strain ATCC 204508 / S288c) GN=FRE3 PE=1 SV=1:143.665	-	KOG0039:Ferric reductase, NADH/NADPH oxidase and related proteins	FAD binding:GO:0050660;;electron transport:GO:0006118;;ferric-chelate reductase activity:GO:0000293;;integral to membrane:GO:0016021;;oxidoreductase activity:GO:0016491;;iron ion binding:GO:0005506
estExt_Genemark1.C_270027	estExt_Genemark1.C_270027	estExt_Genemark1.C_270027	scaffold_27:99023-101058	0.657618	161.11	7.93659	0	yes	26543	IPR013057:Amino acid transporter, transmembrane	sp|P38680|MTR_NEUCR N amino acid transport system protein OS=Neurospora crassa GN=mtr PE=3 SV=2:63.1586	-	KOG1303:Amino acid transporters	-
gm1.8088_g	gm1.8088_g	gm1.8088_g	scaffold_30:320022-321990	2.36305	464.42	7.61864	0	yes	12532	IPR013130:Ferric reductase-like transmembrane component, N-terminal;;IPR013112:FAD-binding 8	sp|P53746|FRE4_YEAST Ferric reductase transmembrane component 4 OS=Saccharomyces cerevisiae (strain ATCC 204508 / S288c) GN=FRE4 PE=1 SV=1:158.303	-	KOG0039:Ferric reductase, NADH/NADPH oxidase and related proteins	FAD binding:GO:0050660;;electron transport:GO:0006118;;ferric-chelate reductase activity:GO:0000293;;integral to membrane:GO:0016021;;oxidoreductase activity:GO:0016491;;iron ion binding:GO:0005506
e_gw1.30.282.1	e_gw1.30.282.1	e_gw1.30.282.1	scaffold_30:334956-340867	0.104533	18.3955	7.45925	2.39918e-12	yes	90904	IPR014031:Beta-ketoacyl synthase, C-terminal;;IPR016035:Acyl transferase/acyl hydrolase/lysophospholipase;;IPR016036:Malonyl-CoA ACP transacylase, ACP-binding;;IPR016039:Thiolase-like;;IPR006162:Phosphopantetheine attachment site;;IPR006163:Phosphopantetheine-binding;;IPR009081:Acyl carrier protein-like;;IPR014043:Acyl transferase;;IPR014030:Beta-ketoacyl synthase, N-terminal	sp|Q03149|WA_EMENI Conidial yellow pigment biosynthesis polyketide synthase OS=Emericella nidulans GN=wA PE=1 SV=2:1044.65	-	KOG1202:Animal-type fatty acid synthase and related proteins	phosphopantetheine binding:GO:0031177;;metabolic process:GO:0008152;;cofactor binding:GO:0048037;;catalytic activity:GO:0003824;;binding:GO:0005488
estExt_fgenesh1_pm.C_210043	estExt_fgenesh1_pm.C_210043	estExt_fgenesh1_pm.C_210043	scaffold_21:153332-155343	1.8894	239.119	6.98366	0	yes	138633	IPR000109:TGF-beta receptor, type I/II extracellular region;;IPR016196:MFS general substrate transporter	sp|P32901|PTR2_YEAST Peptide transporter PTR2 OS=Saccharomyces cerevisiae (strain ATCC 204508 / S288c) GN=PTR2 PE=1 SV=2:461.07	-	KOG1237:H+/oligopeptide symporter	oligopeptide transport:GO:0006857;;transporter activity:GO:0005215;;membrane:GO:0016020	20.01.09 peptide transport	20.09 transport routes	20.09.18 cellular import	20.03 transport facilities
fgenesh1_pm.12_#_10	fgenesh1_pm.12_#_10	fgenesh1_pm.12_#_10	scaffold_12:25473-28282	6.87996	816.661	6.89119	5.95542e-14	yes	130968	IPR013216:Methyltransferase type 11;;IPR001395:Aldo/keto reductase	-	-	-	metabolic process:GO:0008152;;methyltransferase activity:GO:0008168;;oxidoreductase activity:GO:0016491	01.06 lipid, fatty acid and isoprenoid metabolism N.crassa
gm1.698_g	gm1.698_g	gm1.698_g	scaffold_1:2530252-2531954	0.501962	49.9181	6.63584	4.71954e-07	yes	5142	-	-	-	KOG1474:Transcription initiation factor TFIID, subunit BDF1 and related bromodomain proteins	-
fgenesh1_pm.3_#_75	fgenesh1_pm.3_#_75	fgenesh1_pm.3_#_75	scaffold_3:222538-223687	0.523072	42.8042	6.3546	2.30078e-08	yes
e_gw1.28.246.1	e_gw1.28.246.1	e_gw1.28.246.1	scaffold_28:407802-409392	1.98356	161.773	6.34974	1.16462e-12	yes	90357	IPR007114:Major facilitator superfamily;;IPR011701:Major facilitator superfamily MFS-1;;IPR016196:MFS general substrate transporter	sp|Q08777|MCH5_YEAST Riboflavin transporter MCH5 OS=Saccharomyces cerevisiae (strain ATCC 204508 / S288c) GN=MCH5 PE=1 SV=1:159.458	-	KOG2504:Monocarboxylate transporter	transporter activity:GO:0005215;;integral to membrane:GO:0016021;;transport:GO:0006810	20.01.03 C-compound and carbohydrate transport	20.09.18.07 non-vesicular cellular import	20.03 transport facilities
fgenesh2_kg.2_#_203_#_gi|30121670|gb|CB907012.1|CB907012	fgenesh2_kg.2_#_203_#_gi|30121670|gb|CB907012.1|CB907012	fgenesh2_kg.2_#_203_#_gi|30121670|gb|CB907012.1|CB907012	scaffold_2:1354579-1355051	54.5722	4249.98	6.28314	2.28688e-13	yes
e_gw1.1.484.1	e_gw1.1.484.1	e_gw1.1.484.1	scaffold_1:2533205-2533889	35.4345	2102.62	5.89089	2.46431e-12	yes	70056	IPR007274:Ctr copper transporter	sp|O94722|CTR4_SCHPO Copper transport protein ctr4 OS=Schizosaccharomyces pombe (strain ATCC 38366 / 972) GN=ctr4 PE=1 SV=1:125.946	-	KOG3386:Copper transporter	copper ion transport:GO:0006825;;integral to membrane:GO:0016021;;copper ion transmembrane transporter activity:GO:0005375	20.01.01.01.01 heavy metal ion transport (Cu+, Fe3+, etc.) N.crassa	20.09.18 cellular import	34.01.01.01 homeostasis of metal ions (Na, K, Ca etc.) N.crassa
e_gw1.9.100.1	e_gw1.9.100.1	e_gw1.9.100.1	scaffold_9:931503-933482	6.30187	363.411	5.84968	2.81096e-12	yes	80217	IPR013121:Ferric reductase, NAD binding;;IPR013130:Ferric reductase-like transmembrane component, N-terminal;;IPR013112:FAD-binding 8	sp|Q12333|FRE7_YEAST Ferric/cupric reductase transmembrane component 7 OS=Saccharomyces cerevisiae (strain ATCC 204508 / S288c) GN=FRE7 PE=1 SV=2:109.383	-	KOG0039:Ferric reductase, NADH/NADPH oxidase and related proteins	FAD binding:GO:0050660;;electron transport:GO:0006118;;ferric-chelate reductase activity:GO:0000293;;integral to membrane:GO:0016021;;oxidoreductase activity:GO:0016491;;iron ion binding:GO:0005506	34.01.01.01 homeostasis of metal ions (Na, K, Ca etc.) N.crassa	34.11 cellular sensing and response to external stimulus N.crassa
estExt_fgenesh2_kg.C_70091	estExt_fgenesh2_kg.C_70091	estExt_fgenesh2_kg.C_70091	scaffold_7:814102-815794	38.8822	2179.85	5.80898	1.11082e-10	yes	123057	IPR015168:NMT1/THI5 like	sp|P42882|NMT1_ASPPA Protein NMT1 homolog OS=Aspergillus parasiticus GN=nmt1 PE=2 SV=1:577.4	-	-	-	01.03.04 pyrimidine nucleotide/nucleoside/nucleobase metabolism N.crassa	01.07.01 biosynthesis of vitamins, cofactors, and prosthetic groups S.cerevisiae	16.01 protein binding
e_gw1.1.1844.1	e_gw1.1.1844.1	e_gw1.1.1844.1	scaffold_1:3568742-3569257	0.588482	31.8927	5.76008	0.00476255	yes	69372	IPR006461:Protein of unknown function Cys-rich;;IPR004825:Insulin/IGF/relaxin	sp|Q9LS44|PCR4_ARATH Protein PLANT CADMIUM RESISTANCE 4 OS=Arabidopsis thaliana GN=PCR4 PE=3 SV=1:63.1586	-	-	hormone activity:GO:0005179;;extracellular region:GO:0005576
fgenesh1_pg.20_#_27	fgenesh1_pg.20_#_27	fgenesh1_pg.20_#_27	scaffold_20:95039-96479	1.81643	84.9506	5.54744	1.06949e-09	yes	37894	-	sp|Q9UUE3|YNZ6_SCHPO Putative lysine N-acyltransferase C17G9.06c OS=Schizosaccharomyces pombe (strain ATCC 38366 / 972) GN=SPBC17G9.06c PE=2 SV=1:188.734	-	-	-
e_gw1.15.113.1	e_gw1.15.113.1	e_gw1.15.113.1	scaffold_15:291009-292285	0.692885	30.2461	5.44799	3.44937e-06	yes	83936	IPR016040:NAD(P)-binding;;IPR006140:D-isomer specific 2-hydroxyacid dehydrogenase, NAD-binding	sp|P0C1E9|YPRB2_CORML Uncharacterized protein in proB 3&apos;region OS=Corynebacterium melassecola PE=3 SV=1:117.087	-	KOG0069:Glyoxylate/hydroxypyruvate reductase (D-isomer-specific 2-hydroxy acid dehydrogenase superfamily)	metabolic process:GO:0008152;;oxidoreductase activity, acting on the CH-OH group of donors, NAD or NADP as acceptor:GO:0016616;;cofactor binding:GO:0048037;;catalytic activity:GO:0003824;;binding:GO:0005488	01.01.09.02.01 biosynthesis of serine	01.05 C-compound and carbohydrate metabolism
e_gw1.18.194.1	e_gw1.18.194.1	e_gw1.18.194.1	scaffold_18:612929-613717	16.0458	696.92	5.44073	7.06e-11	yes	85783	IPR001189:Manganese and iron superoxide dismutase	sp|Q9Y783|SODM_NEUCR Superoxide dismutase [Mn], mitochondrial OS=Neurospora crassa GN=sod-2 PE=3 SV=1:341.273	1.15.1.1:Superoxide dismutase.	KOG0876:Manganese superoxide dismutase	metal ion binding:GO:0046872;;superoxide metabolic process:GO:0006801;;superoxide dismutase activity:GO:0004784	32.01 stress response	32.01.01 oxidative stress response	32.07 detoxification	32.07.03 detoxification by modification	32.07.07.07 superoxide metabolism	16.17.09 heavy metal binding (Cu, Fe, Zn)
estExt_Genewise1.C_9_t20219	estExt_Genewise1.C_9_t20219	estExt_Genewise1.C_9_t20219	scaffold_9:928754-929783	39.9643	1570.26	5.29614	3.43552e-10	yes	111096	-	sp|Q4WCX9|YA280_ASPFU Uncharacterized protein AFUA_6G02800 OS=Neosartorya fumigata (strain ATCC MYA-4609 / Af293 / CBS 101355 / FGSC A1100) GN=AFUA_6G02800 PE=1 SV=1:54.6842	-	KOG4157:beta-1,6-N-acetylglucosaminyltransferase, contains WSC domain	-
estExt_Genewise1Plus.C_1_t10132	estExt_Genewise1Plus.C_1_t10132	estExt_Genewise1Plus.C_1_t10132	scaffold_1:177274-179343	2.2752	70.8394	4.96048	2.30078e-08	yes	93755	IPR006096:Glutamate/phenylalanine/leucine/valine dehydrogenase, C-terminal;;IPR006095:Glutamate/phenylalanine/leucine/valine dehydrogenase;;IPR016040:NAD(P)-binding;;IPR014362:Glutamate dehydrogenase;;IPR006097:Glutamate/phenylalanine/leucine/valine dehydrogenase, dimerisation region	sp|Q96VJ7|DHE4_GIBFU NADP-specific glutamate dehydrogenase OS=Gibberella fujikuroi GN=GDH2 PE=3 SV=1:743.036	1.4.1.4:Glutamate dehydrogenase (NADP+).	KOG2250:Glutamate/leucine/phenylalanine/valine dehydrogenases	metabolic process:GO:0008152;;glutamate dehydrogenase (NADP+) activity:GO:0004354;;amino acid metabolic process:GO:0006520;;catalytic activity:GO:0003824;;binding:GO:0005488;;oxidoreductase activity:GO:0016491	01.01.03 assimilation of ammonia, metabolism of the glutamate group T.acidophilum	01.01.03.01.02 degradation of glutamine	01.01.03.02.01 biosynthesis of glutamate	01.01.03.02.02 degradation of glutamate	01.01.03.03.02 degradation of proline	01.01.03.05.02 degradation of arginine	01.02 nitrogen, sulfur and selenium metabolism N.crassa	02.10 tricarboxylic-acid pathway (citrate cycle, Krebs cycle, TCA cycle) S.cerevisiae	42.01 cell wall	16.21.07 NAD/NADP binding
e_gw1.19.218.1	e_gw1.19.218.1	e_gw1.19.218.1	scaffold_19:165439-166141	7.66447	223.927	4.8687	6.33157e-08	yes	86288	-	sp|Q9HDU7|YHE8_SCHPO UPF0643 protein PB2B2.08 OS=Schizosaccharomyces pombe (strain ATCC 38366 / 972) GN=SPBPB2B2.08 PE=3 SV=1:139.043	-	-	-
e_gw1.25.147.1	e_gw1.25.147.1	e_gw1.25.147.1	scaffold_25:99230-100263	1.36297	39.7203	4.86505	6.11263e-06	yes	89098	IPR007568:RTA1 like protein	sp|C8ZI10|RSB1_YEAS8 Sphingoid long-chain base transporter RSB1 OS=Saccharomyces cerevisiae (strain Lalvin EC1118 / Prise de mousse) GN=RSB1 PE=2 SV=1:107.842	-	-	integral to membrane:GO:0016021;;response to stress:GO:0006950
e_gw1.31.94.1	e_gw1.31.94.1	e_gw1.31.94.1	scaffold_31:232481-233438	1.44702	41.1889	4.8311	7.03557e-06	yes
fgenesh1_pm.16_#_83	fgenesh1_pm.16_#_83	fgenesh1_pm.16_#_83	scaffold_16:268135-270097	0.475202	13.5107	4.82942	1.73352e-05	yes
e_gw1.8.122.1	e_gw1.8.122.1	e_gw1.8.122.1	scaffold_8:196198-197059	1.11986	28.2369	4.65619	9.42808e-05	yes	79361	-	-	-	KOG0266:WD40 repeat-containing protein	-
estExt_fgenesh2_kg.C_1_t10367	estExt_fgenesh2_kg.C_1_t10367	estExt_fgenesh2_kg.C_1_t10367	scaffold_1:2635453-2636438	116.23	2695.02	4.53524	2.83439e-07	yes	121745	-	sp|Q4WCX9|YA280_ASPFU Uncharacterized protein AFUA_6G02800 OS=Neosartorya fumigata (strain ATCC MYA-4609 / Af293 / CBS 101355 / FGSC A1100) GN=AFUA_6G02800 PE=1 SV=1:73.1738	-	-	-
fgenesh1_pg.15_#_86	fgenesh1_pg.15_#_86	fgenesh1_pg.15_#_86	scaffold_15:364166-365796	8.6764	200.856	4.53292	2.23868e-08	yes	37010	-	sp|Q6U1Z4|CMT1_CRYNE Alpha-1,3-mannosyltransferase CMT1 OS=Cryptococcus neoformans GN=CMT1 PE=1 SV=1:172.555	-	KOG2133:Transcriptional corepressor Atrophin-1/DRPLA	-	01.05 C-compound and carbohydrate metabolism	14.07.02.01 O-directed glycosylation, deglycosylation N.crassa
gw1.4.642.1	gw1.4.642.1	gw1.4.642.1	scaffold_4:207940-209448	1.12536	25.1363	4.48132	2.99917e-05	yes	53261	IPR001138:Fungal transcriptional regulatory protein, N-terminal	sp|Q12151|UPC2_YEAST Sterol uptake control protein 2 OS=Saccharomyces cerevisiae (strain ATCC 204508 / S288c) GN=UPC2 PE=1 SV=1:63.5438	-	-	regulation of transcription, DNA-dependent:GO:0006355;;nucleus:GO:0005634;;zinc ion binding:GO:0008270;;transcription factor activity:GO:0003700
estExt_Genewise1.C_18_t10296	estExt_Genewise1.C_18_t10296	estExt_Genewise1.C_18_t10296	scaffold_18:407048-409532	16.8483	367.009	4.44514	3.51699e-08	yes	113813	IPR004165:Coenzyme A transferase;;IPR004164:Coenzyme A transferase active site;;IPR014388:3-oxoacid CoA-transferase;;IPR012792:3-oxoacid CoA-transferase, subunit A;;IPR012791:3-oxoacid CoA-transferase, subunit B	sp|Q29551|SCOT1_PIG Succinyl-CoA:3-ketoacid-coenzyme A transferase 1, mitochondrial OS=Sus scrofa GN=OXCT1 PE=1 SV=1:495.738	2.8.3.5:3-oxoacid CoA-transferase.	KOG3822:Succinyl-CoA:alpha-ketoacid-CoA transferase	3-oxoacid CoA-transferase activity:GO:0008260;;CoA-transferase activity:GO:0008410;;metabolic process:GO:0008152	01.05 C-compound and carbohydrate metabolism	02.19 metabolism of energy reserves (e.g. glycogen, trehalose) &nbsp;
gw1.12.186.1	gw1.12.186.1	gw1.12.186.1	scaffold_12:789920-791390	0.925831	18.55	4.32452	0.000113981	yes	46613	IPR007219:Fungal specific transcription factor;;IPR001138:Fungal transcriptional regulatory protein, N-terminal	sp|O59741|YN25_SCHPO Uncharacterized transcriptional regulatory protein C530.05 OS=Schizosaccharomyces pombe (strain ATCC 38366 / 972) GN=SPBC530.05 PE=2 SV=1:89.7373	-	-	regulation of transcription, DNA-dependent:GO:0006355;;nucleus:GO:0005634;;zinc ion binding:GO:0008270;;transcription:GO:0006350;;DNA binding:GO:0003677;;transcription factor activity:GO:0003700
e_gw1.6.860.1	e_gw1.6.860.1	e_gw1.6.860.1	scaffold_6:269239-270318	6.95437	138.996	4.32098	5.83002e-07	yes	77007	IPR012336:Thioredoxin-like fold;;IPR004046:Glutathione S-transferase, C-terminal;;IPR010987:Glutathione S-transferase, C-terminal-like	-	-	-	-
fgenesh1_pg.2_#_496	fgenesh1_pg.2_#_496	fgenesh1_pg.2_#_496	scaffold_2:1930984-1932731	50.6984	1004.05	4.30774	5.21315e-07	yes	32968	IPR002293:Amino acid/polyamine transporter I;;IPR004841:Amino acid permease-associated region	sp|P19807|HNM1_YEAST Choline transport protein OS=Saccharomyces cerevisiae (strain ATCC 204508 / S288c) GN=HNM1 PE=1 SV=1:254.603	-	KOG1289:Amino acid transporters	amino acid transmembrane transporter activity:GO:0015171;;transport:GO:0006810;;membrane:GO:0016020;;amino acid transport:GO:0006865	20.01.03 C-compound and carbohydrate transport	20.01.07 amino acid/amino acid derivatives transport S.cerevisiae	20.01.11 amine / polyamine transport	20.01.26 neurotransmitter transport	20.09.18 cellular import	20.03 transport facilities
estExt_Genemark1.C_190168	estExt_Genemark1.C_190168	estExt_Genemark1.C_190168	scaffold_19:576399-580782	1.51948	28.4852	4.22857	3.56764e-06	yes	26117	IPR004276:Glycosyl transferase, family 28	sp|Q9Y751|ATG26_PICPG Sterol 3-beta-glucosyltransferase OS=Pichia pastoris (strain GS115) GN=ATG26 PE=3 SV=1:268.855	-	KOG1192:UDP-glucuronosyl and UDP-glucosyl transferase	transferase activity, transferring hexosyl groups:GO:0016758;;carbohydrate metabolic process:GO:0005975;;lipid glycosylation:GO:0030259
estExt_Genewise1Plus.C_18_t10484	estExt_Genewise1Plus.C_18_t10484	estExt_Genewise1Plus.C_18_t10484	scaffold_18:617856-618801	2.12699	37.6231	4.14474	8.56064e-05	yes	102278	IPR016040:NAD(P)-binding;;IPR002347:Glucose/ribitol dehydrogenase;;IPR013149:Alcohol dehydrogenase, zinc-binding	sp|O31680|YKVO_BACSU Uncharacterized oxidoreductase ykvO OS=Bacillus subtilis GN=ykvO PE=3 SV=1:85.1149	1.1.1.184:Carbonyl reductase (NADPH).	KOG0725:Reductases with broad range of substrate specificities	metabolic process:GO:0008152;;carbonyl reductase (NADPH) activity:GO:0004090;;catalytic activity:GO:0003824;;binding:GO:0005488;;oxidoreductase activity:GO:0016491	01.05 C-compound and carbohydrate metabolism	32.05.05.01 toxins
fgenesh1_pg.4_#_68	fgenesh1_pg.4_#_68	fgenesh1_pg.4_#_68	scaffold_4:197517-198385	4.96695	81.9655	4.04459	2.99917e-05	yes
e_gw1.17.317.1	e_gw1.17.317.1	e_gw1.17.317.1	scaffold_17:684537-685548	2.21482	36.4997	4.04262	0.000149149	yes	85303	IPR004081:Arylamine N-acetyltransferase;;IPR001447:N-acetyltransferase	sp|P11246|ARY2_RABIT Arylamine N-acetyltransferase 2 OS=Oryctolagus cuniculus GN=NAT2 PE=1 SV=1:82.4185	2.3.1.5:Arylamine N-acetyltransferase.	-	metabolic process:GO:0008152;;arylamine N-acetyltransferase activity:GO:0004060;;acetyltransferase activity:GO:0016407
e_gw1.12.517.1	e_gw1.12.517.1	e_gw1.12.517.1	scaffold_12:589466-590069	8.29752	131.192	3.98285	8.15222e-05	yes	82554	IPR007274:Ctr copper transporter	-	-	KOG3386:Copper transporter	copper ion transport:GO:0006825;;integral to membrane:GO:0016021;;copper ion transmembrane transporter activity:GO:0005375
e_gw1.1.2909.1	e_gw1.1.2909.1	e_gw1.1.2909.1	scaffold_1:1961195-1962837	2.83014	44.3976	3.97154	1.79412e-05	yes	69350	IPR002293:Amino acid/polyamine transporter I;;IPR004841:Amino acid permease-associated region	sp|P50276|MUP1_YEAST High-affinity methionine permease OS=Saccharomyces cerevisiae (strain ATCC 204508 / S288c) GN=MUP1 PE=1 SV=1:516.924	-	KOG1287:Amino acid transporters	amino acid transmembrane transporter activity:GO:0015171;;transport:GO:0006810;;membrane:GO:0016020;;amino acid transport:GO:0006865	01.01 amino acid metabolism	20.01.07 amino acid/amino acid derivatives transport S.cerevisiae	20.09.18 cellular import	20.09.18.07 non-vesicular cellular import
e_gw1.15.527.1	e_gw1.15.527.1	e_gw1.15.527.1	scaffold_15:280375-280942	13.2359	204.55	3.94993	1.64291e-05	yes
e_gw1.12.360.1	e_gw1.12.360.1	e_gw1.12.360.1	scaffold_12:586106-587947	2.89988	42.7924	3.88329	2.42968e-05	yes	82106	IPR001128:Cytochrome P450;;IPR002401:Cytochrome P450, E-class, group I	sp|O00061|CP67_UROFA Cytochrome P450 67 (Fragment) OS=Uromyces fabae GN=CYP67 PE=2 SV=1:201.445	1.14.-.-:Acting on paired donors, with incorporation or reduction of	KOG0157:Cytochrome P450 CYP4/CYP19/CYP26 subfamilies	hydroxymethylsilanetriol oxidase activity:GO:0018598;;fluorene oxygenase activity:GO:0018585;;tert-butyl alcohol 2-monooxygenase activity:GO:0018594;;4-chlorophenoxyacetate monooxygenase activity:GO:0018593;;di-n-butyltin dioxygenase activity:GO:0018589;;mono-butyltin dioxygenase activity:GO:0018586;;electron transport:GO:0006118;;monooxygenase activity:GO:0004497;;heme binding:GO:0020037;;2-hydr…
e_gw1.1.1078.1	e_gw1.1.1078.1	e_gw1.1.1078.1	scaffold_1:2622522-2624701	2.25052	32.3083	3.84358	3.58707e-05	yes	69459	IPR001375:Peptidase S9, prolyl oligopeptidase active site region	sp|P34422|DPF6_CAEEL Dipeptidyl peptidase family member 6 OS=Caenorhabditis elegans GN=dpf-6 PE=2 SV=2:103.219	-	KOG2100:Dipeptidyl aminopeptidase	serine-type peptidase activity:GO:0008236;;proteolysis:GO:0006508
gm1.6951_g	gm1.6951_g	gm1.6951_g	scaffold_21:288614-289381	11.4521	158.546	3.79122	4.03662e-05	yes	11395	IPR001214:SET;;IPR003616:Post-SET zinc-binding region	-	-	-	nucleus:GO:0005634
e_gw1.6.650.1	e_gw1.6.650.1	e_gw1.6.650.1	scaffold_6:250173-251602	1.80661	24.7263	3.77468	0.000279296	yes	76562	IPR005828:General substrate transporter;;IPR007114:Major facilitator superfamily;;IPR003663:Sugar transporter;;IPR016196:MFS general substrate transporter;;IPR000585:Hemopexin	sp|P49374|HGT1_KLULA High-affinity glucose transporter OS=Kluyveromyces lactis (strain ATCC 8585 / CBS 2359 / DSM 70799 / NBRC 1267 / NRRL Y-1140 / WM37) GN=HGT1 PE=3 SV=1:172.94	5.3.1.4:L-arabinose isomerase.	KOG0254:Predicted transporter (major facilitator superfamily)	metal ion binding:GO:0046872;;L-arabinose isomerase activity:GO:0008733;;integral to membrane:GO:0016021;;membrane:GO:0016020;;sugar:hydrogen symporter activity:GO:0005351;;carbohydrate transport:GO:0008643;;transporter activity:GO:0005215;;catalytic activity:GO:0003824;;transport:GO:0006810	01.05 C-compound and carbohydrate metabolism	20.01.03 C-compound and carbohydrate transport	20.01.03.01 sugar transport	20.09.18 cellular import	20.09.18.07 non-vesicular cellular import	34.01.01.03 homeostasis of protons	20.03 transport facilities	20.03.02.02.01 proton driven symporter
e_gw1.9.708.1	e_gw1.9.708.1	e_gw1.9.708.1	scaffold_9:1017863-1019445	1.2965	17.0832	3.71989	0.000658347	yes	80105	-	sp|Q5B288|Y5342_EMENI Uncharacterized protein AN5342 OS=Emericella nidulans GN=AN5342 PE=1 SV=1:61.6178	-	-	-
estExt_Genewise1.C_11_t10350	estExt_Genewise1.C_11_t10350	estExt_Genewise1.C_11_t10350	scaffold_11:426954-428237	7.28519	94.6043	3.69887	2.44621e-05	yes	111701	IPR001589:Actinin-type, actin-binding, conserved site;;IPR008985:Concanavalin A-like lectin/glucanase	sp|A1C7B5|EGLX_ASPCL Probable endo-1,3(4)-beta-glucanase ACLA_073210 OS=Aspergillus clavatus (strain ATCC 1007 / CBS 513.65 / DSM 816 / NCTC 3887 / NRRL 1) GN=ACLA_073210 PE=3 SV=1:210.69	-	-	actin binding:GO:0003779
estExt_Genemark1.C_2_t10497	estExt_Genemark1.C_2_t10497	estExt_Genemark1.C_2_t10497	scaffold_2:1818551-1819220	3.30173	42.5904	3.68923	0.00111369	yes
e_gw1.4.494.1	e_gw1.4.494.1	e_gw1.4.494.1	scaffold_4:303950-304996	8.03042	102.774	3.67785	4.28379e-05	yes	74229	-	-	-	KOG4797:Transcriptional regulator	-
e_gw1.23.103.1	e_gw1.23.103.1	e_gw1.23.103.1	scaffold_23:254346-255415	268.065	3378.34	3.65566	0.000122363	yes	88458	IPR013216:Methyltransferase type 11	sp|P67055|UBIE_LISMO Demethylmenaquinone methyltransferase OS=Listeria monocytogenes GN=ubiE PE=3 SV=1:55.0694	-	-	metabolic process:GO:0008152;;methyltransferase activity:GO:0008168
estExt_Genewise1Plus.C_1_t30478	estExt_Genewise1Plus.C_1_t30478	estExt_Genewise1Plus.C_1_t30478	scaffold_1:1896074-1897958	8.41114	105.413	3.64761	1.10914e-05	yes	94416	IPR007114:Major facilitator superfamily;;IPR011701:Major facilitator superfamily MFS-1;;IPR016196:MFS general substrate transporter	sp|P36035|JEN1_YEAST Carboxylic acid transporter protein homolog OS=Saccharomyces cerevisiae (strain ATCC 204508 / S288c) GN=JEN1 PE=1 SV=1:338.961	-	KOG0253:Synaptic vesicle transporter SV2 (major facilitator superfamily)	transporter activity:GO:0005215;;integral to membrane:GO:0016021;;transport:GO:0006810	01.05 C-compound and carbohydrate metabolism	20.01.03 C-compound and carbohydrate transport	20.01.03.03 C4-dicarboxylate transport (e.g. malate, succinate, fumarate) S.cerevisiae	20.03 transport facilities
e_gw1.20.201.1	e_gw1.20.201.1	e_gw1.20.201.1	scaffold_20:105172-109435	3.81719	47.1169	3.62566	7.64503e-06	yes	86938	IPR003593:AAA+ ATPase, core;;IPR011527:ABC transporter, transmembrane region, type 1;;IPR001140:ABC transporter, transmembrane region;;IPR003439:ABC transporter-like	sp|P36619|PMD1_SCHPO Leptomycin B resistance protein pmd1 OS=Schizosaccharomyces pombe (strain ATCC 38366 / 972) GN=pmd1 PE=2 SV=2:792.727;;sp|P36619|PMD1_SCHPO Leptomycin B resistance protein pmd1 OS=Schizosaccharomyces pombe (strain ATCC 38366 / 972) GN=pmd1 PE=2 SV=2:231.106	-	KOG0055:Multidrug/pheromone exporter, ABC superfamily	nucleoside-triphosphatase activity:GO:0017111;;ATP binding:GO:0005524;;integral to membrane:GO:0016021;;ATPase activity:GO:0016887;;transport:GO:0006810;;nucleotide binding:GO:0000166;;ATPase activity, coupled to transmembrane movement of substances:GO:0042626	01.04 phosphate metabolism	20.01.01.07.07 phosphate transport	32.05.01 resistance proteins	34.01.03.03 homeostasis of phosphate	20.03 transport facilities	20.03.25 ABC transporters
fgenesh1_pg.2_#_208	fgenesh1_pg.2_#_208	fgenesh1_pg.2_#_208	scaffold_2:756137-757297	9.86508	120.435	3.60979	2.99917e-05	yes
fgenesh1_pg.5_#_1	fgenesh1_pg.5_#_1	fgenesh1_pg.5_#_1	scaffold_5:199-1829	3.00824	35.6716	3.56779	0.000293851	yes	34062	-	sp|Q06466|VP62L_YEAST Putative vacuolar protein sorting-associated protein YPR157W OS=Saccharomyces cerevisiae (strain ATCC 204508 / S288c) GN=YPR157W PE=2 SV=1:160.229	-	-	-
e_gw1.27.305.1	e_gw1.27.305.1	e_gw1.27.305.1	scaffold_27:143766-144803	60.1761	712.352	3.56533	7.03557e-06	yes	89757	IPR002922:Thiamine biosynthesis Thi4 protein	sp|P23618|THI4_FUSOX Thiazole biosynthetic enzyme, mitochondrial OS=Fusarium oxysporum GN=STI35 PE=2 SV=2:576.63	-	KOG2960:Protein involved in thiamine biosynthesis and DNA damage tolerance	thiamin biosynthetic process:GO:0009228	01.07.01 biosynthesis of vitamins, cofactors, and prosthetic groups S.cerevisiae	10.01.05.01 DNA repair	16.01 protein binding
fgenesh2_kg.29_#_38_#_gi|38139474|gb|CF884792.1|CF884792	fgenesh2_kg.29_#_38_#_gi|38139474|gb|CF884792.1|CF884792	fgenesh2_kg.29_#_38_#_gi|38139474|gb|CF884792.1|CF884792	scaffold_29:223950-224370	12.0797	141.911	3.55433	0.000971771	yes
e_gw1.14.541.1	e_gw1.14.541.1	e_gw1.14.541.1	scaffold_14:140132-141178	41.3659	481.438	3.54084	7.36671e-06	yes	83454	IPR004827:Basic-leucine zipper (bZIP) transcription factor	-	-	-	regulation of transcription, DNA-dependent:GO:0006355;;nucleus:GO:0005634;;transcription factor activity:GO:0003700;;protein dimerization activity:GO:0046983;;sequence-specific DNA binding:GO:0043565
e_gw1.3.595.1	e_gw1.3.595.1	e_gw1.3.595.1	scaffold_3:1283572-1284352	3.67122	42.2316	3.52399	0.00111369	yes	73635	-	sp|P38256|YBU6_YEAST Uncharacterized protein YBR096W OS=Saccharomyces cerevisiae (strain ATCC 204508 / S288c) GN=YBR096W PE=1 SV=1:56.6102	-	KOG4366:Predicted thioesterase	-
gm1.8372_g	gm1.8372_g	gm1.8372_g	scaffold_35:60376-61944	12.3482	139.315	3.49598	1.69906e-05	yes	12816	IPR013027:FAD-dependent pyridine nucleotide-disulphide oxidoreductase;;IPR001327:Pyridine nucleotide-disulphide oxidoreductase, NAD-binding region	sp|Q55CD9|NDH_DICDI Probable NADH dehydrogenase OS=Dictyostelium discoideum GN=DDB_G0270104 PE=3 SV=2:265.774	1.6.99.3:NADH dehydrogenase.	KOG2495:NADH-dehydrogenase (ubiquinone)	FAD binding:GO:0050660;;oxidoreductase activity:GO:0016491;;NADH dehydrogenase activity:GO:0003954	02.13 respiration
e_gw1.4.635.1	e_gw1.4.635.1	e_gw1.4.635.1	scaffold_4:723553-726015	4.6315	51.2184	3.46711	0.000113981	yes	74942	IPR004399:Phosphomethylpyrimidine kinase type-2;;IPR004305:TENA/THI-4 protein/Coenzyme PQQ biosynthesis protein C;;IPR016084:Haem oxygenase-like, multi-helical;;IPR010916:TonB box, conserved site;;IPR013749:Phosphomethylpyrimidine kinase type-1	sp|O94266|THI22_SCHPO Putative hydroxymethylpyrimidine/phosphomethylpyrimidine kinase 2 OS=Schizosaccharomyces pombe (strain ATCC 38366 / 972) GN=SPBP8B7.18c PE=2 SV=1:387.882	2.7.4.7:Phosphomethylpyrimidine kinase.	KOG2598:Phosphomethylpyrimidine kinase	thiamin biosynthetic process:GO:0009228;;phosphomethylpyrimidine kinase activity:GO:0008972	01.04 phosphate metabolism	01.07.01 biosynthesis of vitamins, cofactors, and prosthetic groups N.crassa	11.02.03.04 transcriptional control
estExt_fgenesh1_pg.C_180044	estExt_fgenesh1_pg.C_180044	estExt_fgenesh1_pg.C_180044	scaffold_18:149410-150302	7.31883	80.4659	3.45869	0.000449202	yes	142356	IPR000415:Nitroreductase	sp|Q96VH4|HBN1_YEAST Putative nitroreductase HBN1 OS=Saccharomyces cerevisiae (strain ATCC 204508 / S288c) GN=HBN1 PE=1 SV=1:128.642	-	-	electron transport:GO:0006118;;oxidoreductase activity:GO:0016491	01.06.10 regulation of lipid, fatty acid and isoprenoid metabolism S.cerevisiae
estExt_Genewise1Plus.C_2_t30349	estExt_Genewise1Plus.C_2_t30349	estExt_Genewise1Plus.C_2_t30349	scaffold_2:1703033-1705190	6.89804	74.6123	3.43515	3.58707e-05	yes	95741	IPR007114:Major facilitator superfamily;;IPR011701:Major facilitator superfamily MFS-1;;IPR016196:MFS general substrate transporter	sp|Q7Z9I0|YHA8_SCHPO Uncharacterized MFS-type transporter C409.08 OS=Schizosaccharomyces pombe (strain ATCC 38366 / 972) GN=SPBC409.08 PE=2 SV=1:417.927	-	KOG0255:Synaptic vesicle transporter SVOP and related transporters (major facilitator superfamily)	transporter activity:GO:0005215;;integral to membrane:GO:0016021;;transport:GO:0006810	20.01.11 amine / polyamine transport	20.01.27 drug/toxin transport	32.07 detoxification	32.07.05 detoxification by export	20.03.02.03.01 proton driven antiporter
gm1.2280_g	gm1.2280_g	gm1.2280_g	scaffold_4:80794-81712	27.5752	292.474	3.40686	2.54898e-05	yes	6724	IPR013217:Methyltransferase type 12	sp|O94628|YGE9_SCHPO Uncharacterized methyltransferase C1347.09 OS=Schizosaccharomyces pombe (strain ATCC 38366 / 972) GN=SPBC1347.09 PE=2 SV=1:71.2478	-	KOG1270:Methyltransferases	-
estExt_Genewise1Plus.C_7_t20161	estExt_Genewise1Plus.C_7_t20161	estExt_Genewise1Plus.C_7_t20161	scaffold_7:822494-824456	3.08634	31.8712	3.36829	0.000380426	yes	98410	IPR005828:General substrate transporter;;IPR007114:Major facilitator superfamily;;IPR004738:Phosphate permease;;IPR016196:MFS general substrate transporter;;IPR005829:Sugar transporter, conserved site	sp|P25297|PHO84_YEAST Inorganic phosphate transporter PHO84 OS=Saccharomyces cerevisiae (strain ATCC 204508 / S288c) GN=PHO84 PE=1 SV=2:594.349	-	KOG0252:Inorganic phosphate transporter	phosphate transport:GO:0006817;;transporter activity:GO:0005215;;inorganic phosphate transmembrane transporter activity:GO:0005315;;integral to membrane:GO:0016021;;transport:GO:0006810;;membrane:GO:0016020	01.04 phosphate metabolism	20.01.01.01.01 heavy metal ion transport (Cu+, Fe3+, etc.) S.cerevisiae	20.01.01.07 anion transport	20.01.01.07.07 phosphate transport	20.01.03 C-compound and carbohydrate transport	20.09.18 cellular import	34.01.01.03 homeostasis of protons	34.01.03.03 homeostasis of phosphate	20.03 transport facilities
estExt_Genewise1.C_8_t10244	estExt_Genewise1.C_8_t10244	estExt_Genewise1.C_8_t10244	scaffold_8:302117-303685	34.0456	349.184	3.35844	1.97236e-05	yes	110457	IPR001804:Isocitrate/isopropylmalate dehydrogenase;;IPR004429:3-isopropylmalate dehydrogenase	sp|Q6TWC4|LEU3_SORMA 3-isopropylmalate dehydrogenase OS=Sordaria macrospora GN=LEU1 PE=3 SV=1:527.324	1.1.1.85:3-isopropylmalate dehydrogenase.	KOG0786:3-isopropylmalate dehydrogenase	cytoplasm:GO:0005737;;oxidoreductase activity, acting on the CH-OH group of donors, NAD or NADP as acceptor:GO:0016616;;metabolic process:GO:0008152;;3-isopropylmalate dehydrogenase activity:GO:0003862;;leucine biosynthetic process:GO:0009098	01.01.06.06.01.03 aminoadipic acid pathway	01.01.11 metabolism of the pyruvate family (alanine, isoleucine, leucine, valine) and D-alanine B.subtilis	01.01.11.02.01 biosynthesis of isoleucine	01.01.11.03.01 biosynthesis of valine	01.01.11.04.01 biosynthesis of leucine	01.05 C-compound and carbohydrate metabolism	02.10 tricarboxylic-acid pathway (citrate cycle, Krebs cycle, TCA cycle) A.thaliana	16.21.07 NAD/NADP binding
fgenesh1_pm.31_#_69	fgenesh1_pm.31_#_69	fgenesh1_pm.31_#_69	scaffold_31:193146-193920	1.96646	19.7575	3.32873	0.00890993	yes
e_gw1.20.35.1	e_gw1.20.35.1	e_gw1.20.35.1	scaffold_20:102115-103652	14.9639	147.4	3.30018	5.52086e-05	yes	87111	IPR013027:FAD-dependent pyridine nucleotide-disulphide oxidoreductase;;IPR001327:Pyridine nucleotide-disulphide oxidoreductase, NAD-binding region;;IPR001100:Pyridine nucleotide-disulphide oxidoreductase, class I	sp|Q54NS9|AIFA_DICDI Apoptosis-inducing factor homolog A OS=Dictyostelium discoideum GN=aifA PE=3 SV=1:79.337	1.6.99.3:NADH dehydrogenase.	KOG1336:Monodehydroascorbate/ferredoxin reductase	FAD binding:GO:0050660;;electron transport:GO:0006118;;oxidoreductase activity:GO:0016491;;NADH dehydrogenase activity:GO:0003954
e_gw1.28.73.1	e_gw1.28.73.1	e_gw1.28.73.1	scaffold_28:51401-52271	4.12705	40.561	3.29691	0.00229569	yes
estExt_Genewise1Plus.C_10_t10343	estExt_Genewise1Plus.C_10_t10343	estExt_Genewise1Plus.C_10_t10343	scaffold_10:454636-456450	16.8249	163.803	3.28329	3.5926e-05	yes	99681	IPR001849:Pleckstrin-like	sp|P53907|YNO4_YEAST Uncharacterized protein YNL144C OS=Saccharomyces cerevisiae (strain ATCC 204508 / S288c) GN=YNL144C PE=1 SV=1:55.4546	-	KOG0517:Beta-spectrin	-
fgenesh1_pg.2_#_143	fgenesh1_pg.2_#_143	fgenesh1_pg.2_#_143	scaffold_2:518050-518985	3.25355	30.5455	3.23087	0.00766406	yes	32615	-	-	-	KOG1187:Serine/threonine protein kinase	-
e_gw1.14.290.1	e_gw1.14.290.1	e_gw1.14.290.1	scaffold_14:607163-608470	2.30074	21.3972	3.21726	0.00621014	yes	83911	IPR004013:PHP, C-terminal;;IPR010140:Histidinol phosphate phosphatase, HisJ;;IPR016195:Polymerase and histidinol phosphatase-like	sp|O14059|HIS9_SCHPO Probable histidinol-phosphatase OS=Schizosaccharomyces pombe (strain ATCC 38366 / 972) GN=SPCC1672.01 PE=2 SV=1:214.542	3.1.3.15:Histidinol-phosphatase.	-	histidinol-phosphatase activity:GO:0004401;;catalytic activity:GO:0003824;;histidine biosynthetic process:GO:0000105	01.01.09.07.01 biosynthesis of histidine
fgenesh1_pg.1_#_549	fgenesh1_pg.1_#_549	fgenesh1_pg.1_#_549	scaffold_1:2145111-2145980	8.95693	80.977	3.17644	0.00161746	yes	32060	IPR000868:Isochorismatase hydrolase	sp|P53184|PNC1_YEAST Nicotinamidase OS=Saccharomyces cerevisiae (strain ATCC 204508 / S288c) GN=PNC1 PE=1 SV=1:134.806	3.5.1.19:Nicotinamidase.	KOG4003:Pyrazinamidase/nicotinamidase PNC1	metabolic process:GO:0008152;;nicotinamidase activity:GO:0008936;;catalytic activity:GO:0003824	01.02.02.09 catabolism of nitrogenous compounds	01.03.04 pyrimidine nucleotide/nucleoside/nucleobase metabolism S.cerevisiae	01.07 metabolism of vitamins, cofactors, and prosthetic groups S.cerevisiae	01.07.01 biosynthesis of vitamins, cofactors, and prosthetic groups L.monocytogenes	10.01.09.05 DNA conformation modification (e.g. chromatin) S.cerevisiae	40.20 cell aging
fgenesh1_pg.26_#_120	fgenesh1_pg.26_#_120	fgenesh1_pg.26_#_120	scaffold_26:395856-396525	7.42889	66.9277	3.17138	0.00253332	yes
e_gw1.14.467.1	e_gw1.14.467.1	e_gw1.14.467.1	scaffold_14:394034-394937	14.996	132.227	3.14037	0.000334817	yes	83724	IPR011800:Phosphoadenosine phosphosulphate reductase thioredoxin;;IPR001789:Signal transduction response regulator, receiver region;;IPR004511:Phosphoadenosine phosphosulphate reductase CysH-type;;IPR002500:Phosphoadenosine phosphosulphate reductase	sp|P56859|MET16_EMENI Phosphoadenosine phosphosulfate reductase OS=Emericella nidulans GN=sA PE=3 SV=2:339.347	-	KOG0189:Phosphoadenosine phosphosulfate reductase	regulation of transcription, DNA-dependent:GO:0006355;;two-component signal transduction system (phosphorelay):GO:0000160;;cysteine biosynthetic process:GO:0019344;;sulfate assimilation, phosphoadenylyl sulfate reduction by phosphoadenylyl-sulfate reductase (thioredoxin):GO:0019379;;two-component response regulator activity:GO:0000156;;metabolic process:GO:0008152;;transferase activity:GO:0016740…	01.01 amino acid metabolism	01.01.06.05 metabolism of methionine	01.02 nitrogen, sulfur and selenium metabolism N.crassa	01.02.03.01 sulfate assimilation	01.02.03.03 assimilatory reduction of sulfur
e_gw1.7.865.1	e_gw1.7.865.1	e_gw1.7.865.1	scaffold_7:967057-968978	3.71345	32.3122	3.12125	0.00120826	yes	77618	IPR005828:General substrate transporter;;IPR007114:Major facilitator superfamily;;IPR003663:Sugar transporter;;IPR016196:MFS general substrate transporter;;IPR005829:Sugar transporter, conserved site	sp|Q8VZR6|INT1_ARATH Probable inositol transporter 1 OS=Arabidopsis thaliana GN=INT1 PE=2 SV=1:208.764	5.3.1.4:L-arabinose isomerase.	KOG0254:Predicted transporter (major facilitator superfamily)	sugar:hydrogen symporter activity:GO:0005351;;L-arabinose isomerase activity:GO:0008733;;carbohydrate transport:GO:0008643;;transporter activity:GO:0005215;;integral to membrane:GO:0016021;;transport:GO:0006810;;membrane:GO:0016020	20.01.03 C-compound and carbohydrate transport	20.09.18 cellular import	34.01.01.03 homeostasis of protons	20.03 transport facilities	20.03.02.02.01 proton driven symporter
e_gw1.19.204.1	e_gw1.19.204.1	e_gw1.19.204.1	scaffold_19:437300-438504	7.67439	66.5787	3.11694	0.000831948	yes	86627	IPR001926:Pyridoxal phosphate-dependent enzyme, beta subunit;;IPR005965:1-aminocyclopropane-1-carboxylate deaminase	sp|Q5KMX3|1A1D_CRYNE Probable 1-aminocyclopropane-1-carboxylate deaminase OS=Cryptococcus neoformans GN=CNB00190 PE=3 SV=1:410.994	-	-	pyridoxal phosphate binding:GO:0030170;;metabolic process:GO:0008152;;L-vinylglycine deaminase activity:GO:0034100;;amine catabolic process:GO:0009310;;catalytic activity:GO:0003824;;1-aminocyclopropane-1-carboxylate deaminase activity:GO:0008660	01.05 C-compound and carbohydrate metabolism
estExt_fgenesh1_pm.C_2_t10096	estExt_fgenesh1_pm.C_2_t10096	estExt_fgenesh1_pm.C_2_t10096	scaffold_2:293620-296275	20.5815	177.134	3.10542	8.17805e-05	yes	135773	IPR001030:Aconitase/3-isopropylmalate dehydratase large subunit, alpha/beta/alpha;;IPR004430:3-isopropylmalate dehydratase, large subunit region;;IPR015928:Aconitase/3-isopropylmalate dehydratase, swivel;;IPR004431:3-isopropylmalate dehydratase, small subunit region;;IPR000573:Aconitase A/isopropylmalate dehydratase small subunit, swivel;;IPR012235:3-isopropylmalate dehydratase, fused small/large…	sp|P55251|LEUC_RHIPU 3-isopropylmalate dehydratase OS=Rhizomucor pusillus GN=LEUA PE=3 SV=1:1033.09	4.2.1.33:3-isopropylmalate dehydratase.	KOG0454:3-isopropylmalate dehydratase (aconitase superfamily)	metabolic process:GO:0008152;;3-isopropylmalate dehydratase activity:GO:0003861;;4 iron, 4 sulfur cluster binding:GO:0051539;;leucine biosynthetic process:GO:0009098;;3-isopropylmalate dehydratase complex:GO:0009316	01.01.11.04.01 biosynthesis of leucine	01.01.11.04.02 degradation of leucine
estExt_Genewise1Plus.C_3_t10177	estExt_Genewise1Plus.C_3_t10177	estExt_Genewise1Plus.C_3_t10177	scaffold_3:178542-181744	8.37645	71.8885	3.10135	0.000107155	yes	96150	IPR007219:Fungal specific transcription factor;;IPR001138:Fungal transcriptional regulatory protein, N-terminal	-	-	KOG1474:Transcription initiation factor TFIID, subunit BDF1 and related bromodomain proteins	regulation of transcription, DNA-dependent:GO:0006355;;nucleus:GO:0005634;;zinc ion binding:GO:0008270;;transcription:GO:0006350;;DNA binding:GO:0003677;;transcription factor activity:GO:0003700	32.05.01 resistance proteins
estExt_Genemark1.C_2_t10139	estExt_Genemark1.C_2_t10139	estExt_Genemark1.C_2_t10139	scaffold_2:484017-484991	10.9978	92.2657	3.06858	0.00121271	yes	23622	IPR008238:Chorismate mutase of the AroQ class, eukaryotic type;;IPR002701:Chorismate mutase	sp|P32178|CHMU_YEAST Chorismate mutase OS=Saccharomyces cerevisiae (strain ATCC 204508 / S288c) GN=ARO7 PE=1 SV=1:236.884	5.4.99.5:Chorismate mutase.	KOG0795:Chorismate mutase	chorismate mutase activity:GO:0004106;;aromatic amino acid family biosynthetic process:GO:0009073	01.01.09 metabolism of the cysteine - aromatic group N.crassa	01.01.09.04 metabolism of phenylalanine	01.01.09.05 metabolism of tyrosine	01.01.09.06 metabolism of tryptophan	01.20.15 metabolism of derivatives of dehydroquinic acid, shikimic acid and chorismic acid A.thaliana
fgenesh1_pg.4_#_108	fgenesh1_pg.4_#_108	fgenesh1_pg.4_#_108	scaffold_4:376392-377355	7.81059	63.9284	3.03295	0.00167805	yes	33761	IPR016040:NAD(P)-binding;;IPR013154:Alcohol dehydrogenase GroES-like;;IPR013149:Alcohol dehydrogenase, zinc-binding;;IPR011032:GroES-like	sp|Q9ZUC1|QORL_ARATH Quinone oxidoreductase-like protein At1g23740, chloroplastic OS=Arabidopsis thaliana GN=At1g23740 PE=1 SV=2:121.709	1.-.-.-:Oxidoreductases.	KOG1198:Zinc-binding oxidoreductase	F420H2 dehydrogenase activity:GO:0043738;;metabolic process:GO:0008152;;regulation of oxidoreductase activity:GO:0051341;;catalytic activity:GO:0003824;;sulfur oxygenase reductase activity:GO:0043826;;binding:GO:0005488;;malolactic enzyme activity:GO:0043883	01.05 C-compound and carbohydrate metabolism	02.11.07 regulation of electron transport and membrane-associated energy conservation	20.01.15 electron transport	16.17.09 heavy metal binding (Cu, Fe, Zn)	16.21.07 NAD/NADP binding
estExt_fgenesh1_pg.C_70216	estExt_fgenesh1_pg.C_70216	estExt_fgenesh1_pg.C_70216	scaffold_7:837928-839679	9.11885	73.9246	3.01913	0.000458552	yes	141126	IPR002213:UDP-glucuronosyl/UDP-glucosyltransferase	sp|Q6K1J1|UDB31_CANFA UDP-glucuronosyltransferase 2B31 OS=Canis familiaris GN=UGT2B31 PE=1 SV=1:61.6178	-	KOG1192:UDP-glucuronosyl and UDP-glucosyl transferase	transferase activity, transferring hexosyl groups:GO:0016758;;metabolic process:GO:0008152
fgenesh1_pg.20_#_28	fgenesh1_pg.20_#_28	fgenesh1_pg.20_#_28	scaffold_20:99609-101611	24.1334	191.779	2.99034	0.000154865	yes	37895	IPR011701:Major facilitator superfamily MFS-1;;IPR016196:MFS general substrate transporter	sp|Q870L2|MIRB_EMENI Siderophore iron transporter mirB OS=Emericella nidulans GN=mirB PE=3 SV=1:485.337	-	KOG0254:Predicted transporter (major facilitator superfamily)	-	20.01.01.01.01.01 siderophore-iron transport	20.09.18.07 non-vesicular cellular import	34.01.01.01 homeostasis of metal ions (Na, K, Ca etc.) N.crassa
fgenesh1_pm.26_#_116	fgenesh1_pm.26_#_116	fgenesh1_pm.26_#_116	scaffold_26:356654-360448	6.62136	52.5252	2.98781	0.000417817	yes	133770	IPR005139:PCRF;;IPR011701:Major facilitator superfamily MFS-1;;IPR016196:MFS general substrate transporter;;IPR000352:Class I peptide chain release factor	sp|Q09691|RF1M_SCHPO Putative peptide chain release factor 1, mitochondrial OS=Schizosaccharomyces pombe (strain ATCC 38366 / 972) GN=SPAC2F7.17 PE=2 SV=1:244.202	-	KOG2726:Mitochondrial polypeptide chain release factor	translational termination:GO:0006415;;translation release factor activity:GO:0003747	12.04.03 translation termination
fgenesh1_pm.10_#_279	fgenesh1_pm.10_#_279	fgenesh1_pm.10_#_279	scaffold_10:986977-987494	149.327	1145.35	2.93924	0.000263274	yes
estExt_Genewise1Plus.C_5_t20500	estExt_Genewise1Plus.C_5_t20500	estExt_Genewise1Plus.C_5_t20500	scaffold_5:1330479-1332057	4.34568	33.2346	2.93503	0.00332898	yes	97622	IPR011701:Major facilitator superfamily MFS-1;;IPR016196:MFS general substrate transporter	sp|P36032|MCH2_YEAST Probable transporter MCH2 OS=Saccharomyces cerevisiae (strain ATCC 204508 / S288c) GN=MCH2 PE=1 SV=1:77.7962	-	KOG2504:Monocarboxylate transporter	-	20.01.03 C-compound and carbohydrate transport	20.09.18 cellular import
e_gw1.6.1283.1	e_gw1.6.1283.1	e_gw1.6.1283.1	scaffold_6:312185-313112	56.276	423.141	2.91055	0.000250259	yes	77033	IPR004810:Formyltetrahydrofolate deformylase;;IPR002376:Formyl transferase, N-terminal;;IPR002912:Amino acid-binding ACT	sp|Q46339|PURU_CORS1 Formyltetrahydrofolate deformylase OS=Corynebacterium sp. (strain P-1) GN=purU PE=3 SV=1:311.227	3.5.1.10:Formyltetrahydrofolate deformylase.	KOG3076:5'-phosphoribosylglycinamide formyltransferase	amino acid binding:GO:0016597;;metabolic process:GO:0008152;;hydroxymethyl-, formyl- and related transferase activity:GO:0016742;;biosynthetic process:GO:0009058;;formyltetrahydrofolate deformylase activity:GO:0008864;;'de novo' IMP biosynthetic process:GO:0006189	01.03.01 purin nucleotide/nucleoside/nucleobase metabolism N.crassa	01.03.01.03 purine nucleotide/nucleoside/nucleobase anabolism B.subtilis
estExt_Genewise1Plus.C_340111	estExt_Genewise1Plus.C_340111	estExt_Genewise1Plus.C_340111	scaffold_34:114233-115796	2.74138	20.5817	2.90839	0.00913167	yes	104534	-	-	-	KOG1721:FOG: Zn-finger	-
e_gw1.1.1678.1	e_gw1.1.1678.1	e_gw1.1.1678.1	scaffold_1:861451-862382	30.7764	228.269	2.89084	0.000573558	yes
fgenesh2_kg.7_#_29_#_gi|30115885|gb|CB901227.1|CB901227	fgenesh2_kg.7_#_29_#_gi|30115885|gb|CB901227.1|CB901227	fgenesh2_kg.7_#_29_#_gi|30115885|gb|CB901227.1|CB901227	scaffold_7:247433-248046	77.8999	570.183	2.87173	0.000355625	yes
estExt_Genewise1Plus.C_15_t10070	estExt_Genewise1Plus.C_15_t10070	estExt_Genewise1Plus.C_15_t10070	scaffold_15:88829-90633	40.9552	298.314	2.86471	0.000306448	yes	101318	IPR009049:Argininosuccinate lyase;;IPR000362:Fumarate lyase;;IPR008948:L-Aspartase-like;;IPR003031:Delta crystallin	sp|P50514|ARLZ_SCHPO Probable argininosuccinate lyase OS=Schizosaccharomyces pombe (strain ATCC 38366 / 972) GN=argx PE=2 SV=1:568.54	4.3.2.1:Argininosuccinate lyase.	KOG1316:Argininosuccinate lyase	argininosuccinate lyase activity:GO:0004056;;catalytic activity:GO:0003824;;arginine biosynthetic process via ornithine:GO:0042450	01.01.03.05.01 biosynthesis of arginine	01.01.03.05.02 degradation of arginine	01.01.05.03 metabolism of urea (urea cycle)	01.01.06.01 metabolism of aspartate
fgenesh2_kg.16_#_60_#_gi|30110022|gb|CB895364.1|CB895364	fgenesh2_kg.16_#_60_#_gi|30110022|gb|CB895364.1|CB895364	fgenesh2_kg.16_#_60_#_gi|30110022|gb|CB895364.1|CB895364	scaffold_16:253927-254520	62.6499	452.953	2.85398	0.000499256	yes
fgenesh1_pm.3_#_257	fgenesh1_pm.3_#_257	fgenesh1_pm.3_#_257	scaffold_3:835412-840233	1.91317	13.7759	2.84811	0.00198412	yes	127668	IPR003593:AAA+ ATPase, core;;IPR011527:ABC transporter, transmembrane region, type 1;;IPR001140:ABC transporter, transmembrane region;;IPR003439:ABC transporter-like	sp|P32386|YBT1_YEAST ATP-dependent bile acid permease OS=Saccharomyces cerevisiae (strain ATCC 204508 / S288c) GN=YBT1 PE=1 SV=2:706.057	-	KOG0054:Multidrug resistance-associated protein/mitoxantrone resistance protein, ABC superfamily	nucleoside-triphosphatase activity:GO:0017111;;ATP binding:GO:0005524;;integral to membrane:GO:0016021;;ATPase activity:GO:0016887;;transport:GO:0006810;;nucleotide binding:GO:0000166;;ATPase activity, coupled to transmembrane movement of substances:GO:0042626	01.04 phosphate metabolism	20.01.01.01.01 heavy metal ion transport (Cu+, Fe3+, etc.) S.cerevisiae	20.01.01.07.08 organic anion transport	20.01.03 C-compound and carbohydrate transport	20.01.13 lipid/fatty acid transport	20.01.25 vitamine/cofactor transport	20.01.27 drug/toxin transport	20.09.13 vacuolar/lysosomal transport	20.09.16 cellular export and secretion	32.07 detoxification	32.07.05 detoxification by export	16.01 protein binding	16.19 nucleotide/nucleoside/nucleobase binding	16.19.03 ATP binding	20.03 transport facilities	20.03.25 ABC transporters
estExt_Genewise1Plus.C_12_t20038	estExt_Genewise1Plus.C_12_t20038	estExt_Genewise1Plus.C_12_t20038	scaffold_12:757758-759090	134.449	964.316	2.84245	0.00139032	yes	100583	IPR000757:Glycoside hydrolase, family 16;;IPR008985:Concanavalin A-like lectin/glucanase	sp|P23903|E13B_BACCI Glucan endo-1,3-beta-glucosidase A1 OS=Bacillus circulans GN=glcA PE=1 SV=1:92.4337	-	-	hydrolase activity, hydrolyzing O-glycosyl compounds:GO:0004553;;carbohydrate metabolic process:GO:0005975	01.05.03 polysaccharide metabolism
estExt_fgenesh2_kg.C_40008	estExt_fgenesh2_kg.C_40008	estExt_fgenesh2_kg.C_40008	scaffold_4:84415-85867	29.4458	211.034	2.84134	0.000358831	yes	122477	IPR013027:FAD-dependent pyridine nucleotide-disulphide oxidoreductase	sp|O94284|HMT2_SCHPO Sulfide:quinone oxidoreductase, mitochondrial OS=Schizosaccharomyces pombe (strain ATCC 38366 / 972) GN=hmt2 PE=2 SV=1:365.54	1.-.-.-:Oxidoreductases.	KOG3851:Sulfide:quinone oxidoreductase/flavo-binding protein	F420H2 dehydrogenase activity:GO:0043738;;regulation of oxidoreductase activity:GO:0051341;;sulfur oxygenase reductase activity:GO:0043826;;malolactic enzyme activity:GO:0043883	01.02 nitrogen, sulfur and selenium metabolism N.crassa	20.01.15 electron transport
e_gw1.23.42.1	e_gw1.23.42.1	e_gw1.23.42.1	scaffold_23:262427-263983	44.7917	311.066	2.79592	0.000615935	yes	88423	IPR001753:Crotonase, core	sp|P34559|ECHM_CAEEL Probable enoyl-CoA hydratase, mitochondrial OS=Caenorhabditis elegans GN=ech-6 PE=1 SV=1:161.77	4.2.1.17:Enoyl-CoA hydratase.	KOG1680:Enoyl-CoA hydratase	metabolic process:GO:0008152;;enoyl-CoA hydratase activity:GO:0004300;;catalytic activity:GO:0003824	01.05 C-compound and carbohydrate metabolism	01.06 lipid, fatty acid and isoprenoid metabolism N.crassa	01.06.05 fatty acid metabolism	02.25 oxidation of fatty acids
estExt_Genewise1Plus.C_230020	estExt_Genewise1Plus.C_230020	estExt_Genewise1Plus.C_230020	scaffold_23:32090-33171	64.1028	445.096	2.79566	0.000422013	yes	103154	IPR012336:Thioredoxin-like fold;;IPR003782:Copper chaperone SCO1/SenC;;IPR017276:Synthesis of cytochrome c oxidase, Sco1/Sco2	sp|P23833|SCO1_YEAST Protein SCO1, mitochondrial OS=Saccharomyces cerevisiae (strain ATCC 204508 / S288c) GN=SCO1 PE=1 SV=1:254.603	-	KOG2792:Putative cytochrome C oxidase assembly protein	copper ion transport:GO:0006825;;mitochondrial inner membrane:GO:0005743;;respiratory chain complex IV assembly:GO:0008535;;copper ion binding:GO:0005507;;electron transport:GO:0006118;;cellular copper ion homeostasis:GO:0006878	12.07 translational control	14.10 assembly of protein complexes	20.01.01.01.01 heavy metal ion transport (Cu+, Fe3+, etc.) S.cerevisiae	34.01.01.01 homeostasis of metal ions (Na, K, Ca etc.) S.cerevisiae	16.17.09 heavy metal binding (Cu, Fe, Zn)
gm1.3179_g	gm1.3179_g	gm1.3179_g	scaffold_6:420973-422808	8.87288	60.6056	2.77198	0.00172009	yes	7623	IPR005828:General substrate transporter;;IPR007114:Major facilitator superfamily;;IPR003663:Sugar transporter;;IPR016196:MFS general substrate transporter;;IPR005829:Sugar transporter, conserved site	sp|P53387|KHT2_KLULA Hexose transporter 2 OS=Kluyveromyces lactis (strain ATCC 8585 / CBS 2359 / DSM 70799 / NBRC 1267 / NRRL Y-1140 / WM37) GN=KHT2 PE=3 SV=1:410.609	5.3.1.4:L-arabinose isomerase.	KOG0254:Predicted transporter (major facilitator superfamily)	sugar:hydrogen symporter activity:GO:0005351;;L-arabinose isomerase activity:GO:0008733;;carbohydrate transport:GO:0008643;;transporter activity:GO:0005215;;integral to membrane:GO:0016021;;transport:GO:0006810;;membrane:GO:0016020	01.05 C-compound and carbohydrate metabolism	01.05.25 regulation of C-compound and carbohydrate metabolism N.crassa	20.01.03 C-compound and carbohydrate transport	20.01.03.01 sugar transport	20.09.16 cellular export and secretion	20.09.18 cellular import	20.09.18.07 non-vesicular cellular import	34.11.12 perception of nutrients and nutritional adaptation N.crassa	20.03 transport facilities
estExt_Genewise1Plus.C_350119	estExt_Genewise1Plus.C_350119	estExt_Genewise1Plus.C_350119	scaffold_35:136377-137565	29.622	201.053	2.76283	0.00143997	yes	104620	IPR007274:Ctr copper transporter	sp|P38865|CTR2_YEAST Copper transport protein CTR2 OS=Saccharomyces cerevisiae (strain ATCC 204508 / S288c) GN=CTR2 PE=1 SV=1:100.138	-	KOG3386:Copper transporter	copper ion transport:GO:0006825;;integral to membrane:GO:0016021;;copper ion transmembrane transporter activity:GO:0005375	20.01.01.01.01 heavy metal ion transport (Cu+, Fe3+, etc.) N.crassa	20.09.18.07 non-vesicular cellular import	34.01.01.01 homeostasis of metal ions (Na, K, Ca etc.) N.crassa
gw1.8.195.1	gw1.8.195.1	gw1.8.195.1	scaffold_8:1001196-1002258	29.7161	198.439	2.73938	0.00182133	yes	45199	-	-	2.7.7.6:DNA-directed RNA polymerase.	KOG1216:von Willebrand factor and related coagulation proteins	RNA polymerase activity:GO:0034062;;DNA-directed RNA polymerase III activity:GO:0003902;;DNA-directed RNA polymerase I activity:GO:0003900;;DNA-directed RNA polymerase II activity:GO:0003901;;DNA-directed RNA polymerase activity:GO:0003899
fgenesh1_pg.30_#_38	fgenesh1_pg.30_#_38	fgenesh1_pg.30_#_38	scaffold_30:109550-110741	8.60039	57.1447	2.73214	0.00462332	yes	39148	IPR001461:Peptidase A1;;IPR009007:Peptidase aspartic, catalytic	sp|Q00663|CARP_CANTR Candidapepsin OS=Candida tropicalis GN=SAPT1 PE=1 SV=1:112.464	3.4.23.24:Candidapepsin.	KOG1339:Aspartyl protease	aspartic-type endopeptidase activity:GO:0004190;;pepsin A activity:GO:0004194;;proteolysis:GO:0006508
estExt_fgenesh2_kg.C_160108	estExt_fgenesh2_kg.C_160108	estExt_fgenesh2_kg.C_160108	scaffold_16:596415-596926	28.8523	190.823	2.72548	0.00501525	yes
estExt_fgenesh2_kg.C_70070	estExt_fgenesh2_kg.C_70070	estExt_fgenesh2_kg.C_70070	scaffold_7:620321-621233	244.178	1597.17	2.70951	0.00158093	yes	123040	IPR002379:ATPase, F0/V0 complex, subunit C;;IPR000454:ATPase, F0 complex, subunit C	sp|P00842|ATP9_NEUCR ATP synthase subunit 9, mitochondrial OS=Neurospora crassa GN=atp-9 PE=1 SV=1:204.142	3.6.3.14:H(+)-transporting two-sector ATPase.	KOG3025:Mitochondrial F1F0-ATP synthase, subunit c/ATP9/proteolipid	proton-transporting two-sector ATPase complex:GO:0016469;;ATP synthesis coupled proton transport:GO:0015986;;hydrogen ion transporting ATPase activity, rotational mechanism:GO:0046961;;hydrogen ion transporting ATP synthase activity, rotational mechanism:GO:0046933;;hydrogen-transporting two-sector ATPase activity:GO:0003936;;membrane:GO:0016020;;proton-transporting ATP synthase complex:GO:0045259	02.11 electron transport and membrane-associated energy conservation N.crassa	02.13 respiration	02.45.15 energy generation (e.g. ATP synthase)	34.01.01.03 homeostasis of protons	20.03.22 transport ATPases
fgenesh1_pm.3_#_109	fgenesh1_pm.3_#_109	fgenesh1_pm.3_#_109	scaffold_3:345111-346074	158.932	1029.5	2.69546	0.00121852	yes
estExt_Genewise1Plus.C_6_t10162	estExt_Genewise1Plus.C_6_t10162	estExt_Genewise1Plus.C_6_t10162	scaffold_6:168583-169920	16.5054	104.977	2.66907	0.0019989	yes	97716	IPR003042:Aromatic-ring hydroxylase;;IPR013027:FAD-dependent pyridine nucleotide-disulphide oxidoreductase;;IPR000103:Pyridine nucleotide-disulphide oxidoreductase, class-II	sp|Q6GIM7|TRXB_STAAR Thioredoxin reductase OS=Staphylococcus aureus (strain MRSA252) GN=trxB PE=3 SV=1:70.0922	-	KOG4716:Thioredoxin reductase	metabolic process:GO:0008152;;electron transport:GO:0006118;;oxidoreductase activity:GO:0016491
e_gw1.21.378.1	e_gw1.21.378.1	e_gw1.21.378.1	scaffold_21:140173-141450	11.3983	72.0754	2.66069	0.00787094	yes	87673	IPR008901:Alkaline phytoceramidase	sp|P38298|YPC1_YEAST Alkaline ceramidase YPC1 OS=Saccharomyces cerevisiae (strain ATCC 204508 / S288c) GN=YPC1 PE=1 SV=1:119.398	3.5.1.-:In linear amides.	KOG2329:Alkaline ceramidase	endoplasmic reticulum membrane:GO:0005789;;O-succinylbenzoate synthase activity:GO:0043748;;N2-acetyl-L-lysine deacetylase activity:GO:0043747;;N-acetylgalactosamine-6-phosphate deacetylase activity:GO:0047419;;iprodione amidohydrolase activity:GO:0018748;;integral to membrane:GO:0016021;;protein N-terminal asparagine amidohydrolase activity:GO:0008418;;hydrolase activity, acting on carbon-nitrog…	01.06 lipid, fatty acid and isoprenoid metabolism &nbsp;
fgenesh1_pm.9_#_47	fgenesh1_pm.9_#_47	fgenesh1_pm.9_#_47	scaffold_9:113604-114693	64.3441	406.215	2.65837	0.000847959	yes	130101	IPR002680:Alternative oxidase	sp|Q9C206|AOX_PODAN Alternative oxidase, mitochondrial OS=Podospora anserina GN=AOX1 PE=3 SV=1:475.322	1.-.-.-:Oxidoreductases.	-	F420H2 dehydrogenase activity:GO:0043738;;regulation of oxidoreductase activity:GO:0051341;;sulfur oxygenase reductase activity:GO:0043826;;respiratory gaseous exchange:GO:0007585;;malolactic enzyme activity:GO:0043883;;mitochondrial envelope:GO:0005740	02.13 respiration	02.13.03 aerobic respiration
estExt_fgenesh2_kg.C_60065	estExt_fgenesh2_kg.C_60065	estExt_fgenesh2_kg.C_60065	scaffold_6:615096-616247	71.2618	438.749	2.62219	0.00103305	yes
estExt_Genewise1Plus.C_350032	estExt_Genewise1Plus.C_350032	estExt_Genewise1Plus.C_350032	scaffold_35:42836-46745	13.5689	83.5352	2.62209	0.00103305	yes	104576	IPR013120:Male sterility, NAD-binding;;IPR006163:Phosphopantetheine-binding;;IPR002198:Short-chain dehydrogenase/reductase SDR;;IPR016040:NAD(P)-binding;;IPR000873:AMP-dependent synthetase and ligase;;IPR002347:Glucose/ribitol dehydrogenase;;IPR010080:Thioester reductase;;IPR006162:Phosphopantetheine attachment site;;IPR009081:Acyl carrier protein-like	sp|Q70LM4|LGRD_BREPA Linear gramicidin synthase subunit D OS=Brevibacillus parabrevis GN=lgrD PE=1 SV=1:253.447;;sp|Q70LM4|LGRD_BREPA Linear gramicidin synthase subunit D OS=Brevibacillus parabrevis GN=lgrD PE=1 SV=1:224.172;;sp|Q70LM4|LGRD_BREPA Linear gramicidin synthase subunit D OS=Brevibacillus parabrevis GN=lgrD PE=1 SV=1:402.519;;sp|Q70LM4|LGRD_BREPA Linear gramicidin synthase subunit D OS…	1.2.1.31:Aminoadipate-semialdehyde dehydrogenase.	KOG1178:Non-ribosomal peptide synthetase/alpha-aminoadipate reductase and related enzymes	phosphopantetheine binding:GO:0031177;;L-aminoadipate-semialdehyde dehydrogenase activity:GO:0004043;;metabolic process:GO:0008152;;cofactor binding:GO:0048037;;catalytic activity:GO:0003824;;binding:GO:0005488;;oxidoreductase activity:GO:0016491;;aminoadipate-semialdehyde dehydrogenase complex:GO:0005949
estExt_fgenesh1_pg.C_370029	estExt_fgenesh1_pg.C_370029	estExt_fgenesh1_pg.C_370029	scaffold_37:132337-133317	39.9928	245.859	2.62002	0.00131725	yes	143221	IPR003719:Phenazine biosynthesis PhzC/PhzF protein	sp|Q98KN6|Y1393_RHILO Uncharacterized isomerase mll1393 OS=Rhizobium loti GN=mll1393 PE=3 SV=1:94.7449	-	KOG3033:Predicted PhzC/PhzF-type epimerase	biosynthetic process:GO:0009058;;catalytic activity:GO:0003824	01.20 secondary metabolism
estExt_Genemark1.C_60029	estExt_Genemark1.C_60029	estExt_Genemark1.C_60029	scaffold_6:105768-107402	54.2522	332.892	2.6173	0.00130251	yes	24454	IPR013057:Amino acid transporter, transmembrane	sp|P38680|MTR_NEUCR N amino acid transport system protein OS=Neurospora crassa GN=mtr PE=3 SV=2:540.806	-	KOG1303:Amino acid transporters	-	20.01.07 amino acid/amino acid derivatives transport N.crassa	34.11.12 perception of nutrients and nutritional adaptation N.crassa
estExt_fgenesh1_pm.C_2_t10381	estExt_fgenesh1_pm.C_2_t10381	estExt_fgenesh1_pm.C_2_t10381	scaffold_2:1347310-1349644	11.341	68.622	2.59713	0.00180689	yes	135905	IPR002198:Short-chain dehydrogenase/reductase SDR	-	-	-	metabolic process:GO:0008152;;oxidoreductase activity:GO:0016491
e_gw1.12.164.1	e_gw1.12.164.1	e_gw1.12.164.1	scaffold_12:520761-521701	23.9973	143.458	2.57968	0.00430255	yes	82033	IPR013078:Phosphoglycerate mutase	sp|Q09676|YA03_SCHPO Uncharacterized protein C5H10.03 OS=Schizosaccharomyces pombe (strain ATCC 38366 / 972) GN=SPAC5H10.03 PE=2 SV=1:68.9366	-	KOG4754:Predicted phosphoglycerate mutase	-
estExt_Genewise1Plus.C_16_t10311	estExt_Genewise1Plus.C_16_t10311	estExt_Genewise1Plus.C_16_t10311	scaffold_16:368777-370470	26.1077	154.877	2.56857	0.00147834	yes	101673	-	-	-	KOG4701:Chitinase	-
gm1.6718_g	gm1.6718_g	gm1.6718_g	scaffold_20:85394-90836	3.72164	21.9447	2.55986	0.00264817	yes	11162	IPR000873:AMP-dependent synthetase and ligase;;IPR006162:Phosphopantetheine attachment site;;IPR001242:Condensation domain;;IPR006163:Phosphopantetheine-binding;;IPR009081:Acyl carrier protein-like;;IPR010071:Amino acid adenylation	sp|Q01886|HTS1_COCCA HC-toxin synthetase OS=Cochliobolus carbonum GN=HTS1 PE=1 SV=2:77.411;;sp|Q01886|HTS1_COCCA HC-toxin synthetase OS=Cochliobolus carbonum GN=HTS1 PE=1 SV=2:88.5817;;sp|Q01886|HTS1_COCCA HC-toxin synthetase OS=Cochliobolus carbonum GN=HTS1 PE=1 SV=2:72.0182;;sp|Q01886|HTS1_COCCA HC-toxin synthetase OS=Cochliobolus carbonum GN=HTS1 PE=1 SV=2:89.7373;;sp|Q01886|HTS1_COCCA HC-toxi…	-	KOG1178:Non-ribosomal peptide synthetase/alpha-aminoadipate reductase and related enzymes	phosphopantetheine binding:GO:0031177;;ligase activity:GO:0016874;;metabolic process:GO:0008152;;cofactor binding:GO:0048037;;catalytic activity:GO:0003824	32.05.05.01 toxins
estExt_fgenesh1_pg.C_120082	estExt_fgenesh1_pg.C_120082	estExt_fgenesh1_pg.C_120082	scaffold_12:361964-364330	26.2281	154.538	2.55878	0.00143997	yes	141796	IPR007114:Major facilitator superfamily;;IPR011701:Major facilitator superfamily MFS-1;;IPR016196:MFS general substrate transporter;;IPR001958:Tetracycline resistance protein, TetA	sp|P25351|YCR3_YEAST Uncharacterized membrane protein YCR023C OS=Saccharomyces cerevisiae (strain ATCC 204508 / S288c) GN=YCR023C PE=1 SV=2:224.172	-	KOG2615:Permease of the major facilitator superfamily	tetracycline:hydrogen antiporter activity:GO:0015520;;transporter activity:GO:0005215;;integral to membrane:GO:0016021;;transport:GO:0006810;;response to antibiotic:GO:0046677;;tetracycline transport:GO:0015904	32.07 detoxification	20.03 transport facilities
estExt_Genewise1Plus.C_8_t10169	estExt_Genewise1Plus.C_8_t10169	estExt_Genewise1Plus.C_8_t10169	scaffold_8:199351-202301	3.98957	23.3092	2.54659	0.00700467	yes	98788	IPR007219:Fungal specific transcription factor;;IPR001138:Fungal transcriptional regulatory protein, N-terminal	sp|Q2UD93|XLNR_ASPOR Xylanolytic transcriptional activator xlnR OS=Aspergillus oryzae (strain ATCC 42149 / RIB 40) GN=xlnR PE=1 SV=2:784.252	-	-	regulation of transcription, DNA-dependent:GO:0006355;;nucleus:GO:0005634;;zinc ion binding:GO:0008270;;transcription:GO:0006350;;DNA binding:GO:0003677;;transcription factor activity:GO:0003700	01.05.25 regulation of C-compound and carbohydrate metabolism N.crassa	11.02.03.04 transcriptional control
fgenesh1_pm.4_#_186	fgenesh1_pm.4_#_186	fgenesh1_pm.4_#_186	scaffold_4:613699-614611	37.1423	215.433	2.5361	0.0025764	yes	128189	IPR012336:Thioredoxin-like fold;;IPR001200:Phosducin	sp|Q2HJA9|PHLP_BOVIN Phosducin-like protein OS=Bos taurus GN=PDCL PE=2 SV=1:75.0998	-	KOG3171:Conserved phosducin-like protein	-
estExt_Genewise1Plus.C_6_t30188	estExt_Genewise1Plus.C_6_t30188	estExt_Genewise1Plus.C_6_t30188	scaffold_6:1356220-1358038	60.0998	347.125	2.53003	0.00172009	yes	98127	-	-	-	KOG1216:von Willebrand factor and related coagulation proteins	-
estExt_Genewise1Plus.C_560018	estExt_Genewise1Plus.C_560018	estExt_Genewise1Plus.C_560018	scaffold_56:18294-19722	19.9491	113.505	2.50836	0.0032487	yes	105289	IPR013750:GHMP kinase, C-terminal;;IPR000870:Homoserine kinase;;IPR006203:GHMP kinase, ATP-binding, conserved site;;IPR006204:GHMP kinase	sp|P17423|KHSE_YEAST Homoserine kinase OS=Saccharomyces cerevisiae (strain ATCC 204508 / S288c) GN=THR1 PE=1 SV=4:412.149	2.7.1.39:Homoserine kinase.	KOG1537:Homoserine kinase	ATP binding:GO:0005524;;kinase activity:GO:0016301;;phosphorylation:GO:0016310;;threonine metabolic process:GO:0006566;;homoserine kinase activity:GO:0004413	01.01.06.04.01 biosynthesis of threonine	01.01.06.05 metabolism of methionine	01.01.09.02 metabolism of serine	01.01.11.02 metabolism of isoleucine	01.04 phosphate metabolism
estExt_Genewise1Plus.C_13_t10395	estExt_Genewise1Plus.C_13_t10395	estExt_Genewise1Plus.C_13_t10395	scaffold_13:530996-533620	14.4	81.9155	2.50807	0.0021416	yes	100832	-	-	-	KOG1649:SWI-SNF chromatin remodeling complex, Snf5 subunit	-
estExt_fgenesh1_pm.C_60043	estExt_fgenesh1_pm.C_60043	estExt_fgenesh1_pm.C_60043	scaffold_6:121526-123279	56.927	322.556	2.50237	0.00233083	yes	136711	IPR007114:Major facilitator superfamily;;IPR011701:Major facilitator superfamily MFS-1;;IPR016196:MFS general substrate transporter	sp|Q9P6J0|YHDC_SCHPO Uncharacterized transporter C1683.12 OS=Schizosaccharomyces pombe (strain ATCC 38366 / 972) GN=SPBC1683.12 PE=2 SV=1:172.555	-	KOG2533:Permease of the major facilitator superfamily	transporter activity:GO:0005215;;integral to membrane:GO:0016021;;transport:GO:0006810	20.01.03 C-compound and carbohydrate transport	20.01.23 allantoin and allantoate transport	20.01.25 vitamine/cofactor transport	20.09.18.07 non-vesicular cellular import	20.03 transport facilities
estExt_fgenesh1_pm.C_1_t20061	estExt_fgenesh1_pm.C_1_t20061	estExt_fgenesh1_pm.C_1_t20061	scaffold_1:1942755-1944057	57.9198	327.373	2.49881	0.00188325	yes	135482	IPR016040:NAD(P)-binding;;IPR007886:Alanine dehydrogenase/PNT, N-terminal;;IPR007698:Alanine dehydrogenase/PNT, C-terminal	sp|Q09694|LYS1_SCHPO Saccharopine dehydrogenase [NAD+, L-lysine-forming] OS=Schizosaccharomyces pombe (strain ATCC 38366 / 972) GN=lys3 PE=1 SV=2:398.667	1.5.1.7:Saccharopine dehydrogenase (NAD+, L-lysine forming).	KOG0172:Lysine-ketoglutarate reductase/saccharopine dehydrogenase	metabolic process:GO:0008152;;electron transport:GO:0006118;;catalytic activity:GO:0003824;;saccharopine dehydrogenase (NAD+, L-lysine-forming) activity:GO:0004754;;binding:GO:0005488;;oxidoreductase activity:GO:0016491	01.01.06.06.01 biosynthesis of lysine	01.01.06.06.01.03 aminoadipic acid pathway	01.01.06.06.02 degradation of lysine	16.21.07 NAD/NADP binding
estExt_fgenesh1_pg.C_140112	estExt_fgenesh1_pg.C_140112	estExt_fgenesh1_pg.C_140112	scaffold_14:430545-432388	6.85685	38.6282	2.49404	0.00983494	yes	142028	IPR000782:Beta-Ig-H3/fasciclin	sp|Q62009|POSTN_MOUSE Periostin OS=Mus musculus GN=Postn PE=1 SV=2:66.6254	-	KOG1218:Proteins containing Ca2+-binding EGF-like domains	-
estExt_fgenesh2_kg.C_180071	estExt_fgenesh2_kg.C_180071	estExt_fgenesh2_kg.C_180071	scaffold_18:516788-518139	157.689	882.142	2.48393	0.00661844	yes	124396	IPR005828:General substrate transporter;;IPR007114:Major facilitator superfamily;;IPR003663:Sugar transporter;;IPR016196:MFS general substrate transporter;;IPR005829:Sugar transporter, conserved site	sp|P49374|HGT1_KLULA High-affinity glucose transporter OS=Kluyveromyces lactis (strain ATCC 8585 / CBS 2359 / DSM 70799 / NBRC 1267 / NRRL Y-1140 / WM37) GN=HGT1 PE=3 SV=1:341.658	5.3.1.4:L-arabinose isomerase.	KOG0254:Predicted transporter (major facilitator superfamily)	sugar:hydrogen symporter activity:GO:0005351;;L-arabinose isomerase activity:GO:0008733;;carbohydrate transport:GO:0008643;;transporter activity:GO:0005215;;integral to membrane:GO:0016021;;transport:GO:0006810;;membrane:GO:0016020	20.01.03 C-compound and carbohydrate transport	20.09.18.07 non-vesicular cellular import
e_gw1.9.769.1	e_gw1.9.769.1	e_gw1.9.769.1	scaffold_9:1064182-1065889	16.3876	90.5927	2.46679	0.00359057	yes	79819	IPR013027:FAD-dependent pyridine nucleotide-disulphide oxidoreductase	-	-	-	-
estExt_fgenesh1_pm.C_100171	estExt_fgenesh1_pm.C_100171	estExt_fgenesh1_pm.C_100171	scaffold_10:610066-612933	72.2049	394.804	2.45097	0.00904785	yes	137482	IPR001623:Heat shock protein DnaJ, N-terminal;;IPR013215:Cobalamin (vitamin B12)-independent methionine synthase MetE, N-terminal;;IPR002629:Methionine synthase, vitamin-B12 independent;;IPR006276:5-methyltetrahydropteroyltriglutamate--homocysteine S-methyltransferase	sp|Q9UT19|METE_SCHPO Probable 5-methyltetrahydropteroyltriglutamate--homocysteine methyltransferase OS=Schizosaccharomyces pombe (strain ATCC 38366 / 972) GN=SPAC9.09 PE=1 SV=1:989.564	2.1.1.14:5-methyltetrahydropteroyltriglutamate--homocysteine S-methyltransferase.	KOG2263:Methionine synthase II (cobalamin-independent)	zinc ion binding:GO:0008270;;amino acid biosynthetic process:GO:0008652;;methionine biosynthetic process:GO:0009086;;heat shock protein binding:GO:0031072;;5-methyltetrahydropteroyltriglutamate-homocysteine S-methyltransferase activity:GO:0003871	01.01 amino acid metabolism	01.01.06 metabolism of the aspartate family	01.01.06.05.01 biosynthesis of methionine	01.01.06.05.02 degradation of methionine	14.07.09 posttranslational modification of amino acids (e.g. hydroxylation, methylation) L.innocua
estExt_fgenesh1_pg.C_300010	estExt_fgenesh1_pg.C_300010	estExt_fgenesh1_pg.C_300010	scaffold_30:29237-30495	26.1148	142.636	2.4494	0.00404052	yes	143037	IPR011009:Protein kinase-like	-	-	-	-
e_gw1.35.123.1	e_gw1.35.123.1	e_gw1.35.123.1	scaffold_35:48167-49706	25.2518	137.079	2.44055	0.00298849	yes	91864	IPR002293:Amino acid/polyamine transporter I;;IPR004841:Amino acid permease-associated region;;IPR004840:Amino acid permease, conserved site	sp|P04817|CAN1_YEAST Arginine permease OS=Saccharomyces cerevisiae (strain ATCC 204508 / S288c) GN=CAN1 PE=1 SV=2:444.121	-	KOG1286:Amino acid transporters	amino acid transmembrane transporter activity:GO:0015171;;integral to membrane:GO:0016021;;transport:GO:0006810;;membrane:GO:0016020;;amino acid transport:GO:0006865	01.06 lipid, fatty acid and isoprenoid metabolism S.cerevisiae	20.01.01.01.01 heavy metal ion transport (Cu+, Fe3+, etc.) S.cerevisiae	20.01.03 C-compound and carbohydrate transport	20.01.07 amino acid/amino acid derivatives transport N.crassa	20.01.13 lipid/fatty acid transport	20.01.25 vitamine/cofactor transport	20.09.04 mitochondrial transport	20.09.16 cellular export and secretion	20.09.18 cellular import	20.09.18.07 non-vesicular cellular import	32.01.03 osmotic and salt stress response	34.01.01.01 homeostasis of metal ions (Na, K, Ca etc.) S.cerevisiae	34.11.03.13 osmosensing	20.03 transport facilities
e_gw1.12.485.1	e_gw1.12.485.1	e_gw1.12.485.1	scaffold_12:682367-683615	132.106	714.168	2.43457	0.0048931	yes	81999	IPR001138:Fungal transcriptional regulatory protein, N-terminal	sp|O93870|FCR1_CANAL Fluconazole resistance protein 1 OS=Candida albicans GN=FCR1 PE=4 SV=1:77.411	-	-	regulation of transcription, DNA-dependent:GO:0006355;;nucleus:GO:0005634;;zinc ion binding:GO:0008270;;transcription factor activity:GO:0003700	11.02.03.04 transcriptional control	32.05.01.03 chemical agent resistance
estExt_fgenesh1_pm.C_2_t20235	estExt_fgenesh1_pm.C_2_t20235	estExt_fgenesh1_pm.C_2_t20235	scaffold_2:2520618-2521721	26.2933	139.187	2.40425	0.00511451	yes	136094	-	-	-	KOG1216:von Willebrand factor and related coagulation proteins	-
e_gw1.1.2032.1	e_gw1.1.2032.1	e_gw1.1.2032.1	scaffold_1:3165083-3168857	12.8146	66.2995	2.37121	0.00368784	yes	67857	IPR016040:NAD(P)-binding;;IPR000873:AMP-dependent synthetase and ligase;;IPR013120:Male sterility, NAD-binding;;IPR014397:L-aminoadipate-semialdehyde dehydrogenase, large subunit;;IPR010080:Thioester reductase;;IPR006163:Phosphopantetheine-binding;;IPR009081:Acyl carrier protein-like	sp|O74298|LYS2_PENCH L-aminoadipate-semialdehyde dehydrogenase large subunit OS=Penicillium chrysogenum GN=lys2 PE=3 SV=1:1191.79	1.2.1.31:Aminoadipate-semialdehyde dehydrogenase.	KOG1178:Non-ribosomal peptide synthetase/alpha-aminoadipate reductase and related enzymes	L-aminoadipate-semialdehyde dehydrogenase activity:GO:0004043;;metabolic process:GO:0008152;;cofactor binding:GO:0048037;;catalytic activity:GO:0003824;;binding:GO:0005488;;aminoadipate-semialdehyde dehydrogenase complex:GO:0005949	01.01 amino acid metabolism	01.01.06.06.01.03 aminoadipic acid pathway
estExt_fgenesh1_pm.C_70402	estExt_fgenesh1_pm.C_70402	estExt_fgenesh1_pm.C_70402	scaffold_7:1336720-1338998	48.267	237.873	2.30108	0.00619854	yes	137069	IPR008162:Inorganic pyrophosphatase	sp|O59714|YBH6_SCHPO Uncharacterized membrane protein C3B8.06 OS=Schizosaccharomyces pombe (strain ATCC 38366 / 972) GN=SPBC3B8.06 PE=1 SV=1:259.996	-	-	phosphate metabolic process:GO:0006796;;cytoplasm:GO:0005737;;magnesium ion binding:GO:0000287;;inorganic diphosphatase activity:GO:0004427
estExt_fgenesh1_pm.C_2_t10114	estExt_fgenesh1_pm.C_2_t10114	estExt_fgenesh1_pm.C_2_t10114	scaffold_2:371163-373514	19.0803	93.3271	2.29021	0.00590838	yes	135784	IPR004621:Eukaryotic-type methylenetetrahydrofolate reductase;;IPR003171:Methylenetetrahydrofolate reductase	sp|Q10258|MTHR1_SCHPO Methylenetetrahydrofolate reductase 1 OS=Schizosaccharomyces pombe (strain ATCC 38366 / 972) GN=met9 PE=1 SV=1:619.387	1.5.1.20:Methylenetetrahydrofolate reductase (NADPH).	KOG0564:5,10-methylenetetrahydrofolate reductase	methionine metabolic process:GO:0006555;;methylenetetrahydrofolate reductase (NADPH) activity:GO:0004489	01.01 amino acid metabolism	01.01.06.05 metabolism of methionine	01.01.06.05.01 biosynthesis of methionine	01.02 nitrogen, sulfur and selenium metabolism N.crassa	01.05 C-compound and carbohydrate metabolism	01.05.13.03 tetrahydrofolate-dependent C-1-transfer N.crassa	01.07 metabolism of vitamins, cofactors, and prosthetic groups	01.07.01 biosynthesis of vitamins, cofactors, and prosthetic groups N.crassa	12.01.01 ribosomal proteins	34.11.13.07 circulation (e.g. blood pressure)	16.01 protein binding	16.21.07 NAD/NADP binding
estExt_Genewise1Plus.C_6_t20403	estExt_Genewise1Plus.C_6_t20403	estExt_Genewise1Plus.C_6_t20403	scaffold_6:993078-993577	692.745	3385.73	2.28907	0.00621854	yes
estExt_Genewise1Plus.C_18_t10152	estExt_Genewise1Plus.C_18_t10152	estExt_Genewise1Plus.C_18_t10152	scaffold_18:138489-140683	16.4116	80.0279	2.28578	0.00834917	yes	102117	IPR002495:Glycosyl transferase, family 8	sp|O15488|GLYG2_HUMAN Glycogenin-2 OS=Homo sapiens GN=GYG2 PE=1 SV=2:178.333	-	KOG1950:Glycosyl transferase, family 8 - glycogenin	transferase activity, transferring hexosyl groups:GO:0016758;;carbohydrate biosynthetic process:GO:0016051	01.05.02.07 sugar, glucoside, polyol and carboxylate catabolism N.crassa
e_gw1.2.922.1	e_gw1.2.922.1	e_gw1.2.922.1	scaffold_2:1879599-1881970	19.8173	95.8544	2.27408	0.00657016	yes	71028	IPR002345:Lipocalin	-	-	-	transporter activity:GO:0005215;;transport:GO:0006810;;binding:GO:0005488
estExt_Genewise1Plus.C_12_t10438	estExt_Genewise1Plus.C_12_t10438	estExt_Genewise1Plus.C_12_t10438	scaffold_12:628619-630043	41.3225	198.432	2.26365	0.00652074	yes	100531	IPR000583:Glutamine amidotransferase, class-II;;IPR012280:Semialdehyde dehydrogenase, dimerisation region;;IPR000534:Semialdehyde dehydrogenase, NAD-binding;;IPR016040:NAD(P)-binding;;IPR005676:Aspartate-semialdehyde dehydrogenase, peptidoglycan lacking;;IPR000319:Aspartate-semialdehyde dehydrogenase, conserved site;;IPR012080:Aspartate-semialdehyde dehydrogenase	sp|P78780|DHAS_SCHPO Probable aspartate-semialdehyde dehydrogenase OS=Schizosaccharomyces pombe (strain ATCC 38366 / 972) GN=SPCC1827.06c PE=1 SV=2:419.853	1.2.1.11:Aspartate-semialdehyde dehydrogenase.	KOG4777:Aspartate-semialdehyde dehydrogenase	cytoplasm:GO:0005737;;NAD binding:GO:0051287;;amino acid metabolic process:GO:0006520;;threonine biosynthetic process:GO:0009088;;metabolic process:GO:0008152;;amino acid biosynthetic process:GO:0008652;;aspartate-semialdehyde dehydrogenase activity:GO:0004073;;methionine biosynthetic process:GO:0009086;;catalytic activity:GO:0003824;;oxidoreductase activity, acting on the aldehyde or oxo group o…	01.01.06 metabolism of the aspartate family	01.01.06.04 metabolism of threonine	01.01.06.05 metabolism of methionine	01.01.06.06.01 biosynthesis of lysine	01.01.06.06.01.01 diaminopimelic acid pathway	01.01.09.02 metabolism of serine
estExt_fgenesh2_kg.C_210029	estExt_fgenesh2_kg.C_210029	estExt_fgenesh2_kg.C_210029	scaffold_21:118695-119470	71.392	331.118	2.21351	0.00983494	yes
estExt_fgenesh1_pm.C_230110	estExt_fgenesh1_pm.C_230110	estExt_fgenesh1_pm.C_230110	scaffold_23:396050-397228	45.9746	208.47	2.18093	0.0098596	yes	138813	IPR001804:Isocitrate/isopropylmalate dehydrogenase	sp|O14104|LYS12_SCHPO Probable homoisocitrate dehydrogenase OS=Schizosaccharomyces pombe (strain ATCC 38366 / 972) GN=lys12 PE=1 SV=1:477.248	1.1.1.87:3-carboxy-2-hydroxyadipate dehydrogenase.	KOG0785:Isocitrate dehydrogenase, alpha subunit	oxidoreductase activity, acting on the CH-OH group of donors, NAD or NADP as acceptor:GO:0016616;;metabolic process:GO:0008152;;homoisocitrate dehydrogenase activity:GO:0047046	01.01.03.02.01 biosynthesis of glutamate	01.01.06.06.01.03 aminoadipic acid pathway	01.01.11 metabolism of the pyruvate family (alanine, isoleucine, leucine, valine) and D-alanine B.subtilis	01.01.11.02.01 biosynthesis of isoleucine	01.01.11.03.01 biosynthesis of valine	01.01.11.04.01 biosynthesis of leucine	01.05 C-compound and carbohydrate metabolism	01.05.02.04 sugar, glucoside, polyol and carboxylate anabolism	01.05.02.07 sugar, glucoside, polyol and carboxylate catabolism	02.01 glycolysis and gluconeogenesis	02.10 tricarboxylic-acid pathway (citrate cycle, Krebs cycle, TCA cycle) A.thaliana	20.01.15 electron transport	16.21.07 NAD/NADP binding
gw1.17.351.1	gw1.17.351.1	gw1.17.351.1	scaffold_17:430402-431583	308.911	63.8743	-2.27388	0.00605775	yes	56580	IPR006769:Protein of unknown function DUF607	-	-	KOG2966:Uncharacterized conserved protein	-
estExt_fgenesh1_pm.C_2_t20140	estExt_fgenesh1_pm.C_2_t20140	estExt_fgenesh1_pm.C_2_t20140	scaffold_2:2221603-2224335	61.3306	11.9873	-2.3551	0.00538511	yes	136048	-	-	3.2.1.3:Glucan 1,4-alpha-glucosidase.	KOG1216:von Willebrand factor and related coagulation proteins	glucan 1,4-alpha-glucosidase activity:GO:0004339
estExt_Genewise1Plus.C_7_t10493	estExt_Genewise1Plus.C_7_t10493	estExt_Genewise1Plus.C_7_t10493	scaffold_7:602725-604343	102.479	19.9019	-2.36435	0.00572904	yes
gw1.13.27.1	gw1.13.27.1	gw1.13.27.1	scaffold_13:164269-165162	523.104	99.7007	-2.39142	0.00345824	yes	40992	IPR000791:GPR1/FUN34/yaaH	sp|P32907|ATO2_YEAST Ammonia transport outward protein 2 OS=Saccharomyces cerevisiae (strain ATCC 204508 / S288c) GN=ATO2 PE=1 SV=1:199.519	-	-	membrane:GO:0016020	01.02 nitrogen, sulfur and selenium metabolism S.cerevisiae	01.03.16.03 DNA degradation	01.05.25 regulation of C-compound and carbohydrate metabolism S.cerevisiae	10.01 DNA processing	10.03.02 meiosis	20.01.01.01 cation transport (H+, Na+, K+, Ca2+ , NH4+, etc.) S.cerevisiae	20.01.03 C-compound and carbohydrate transport	20.09.16 cellular export and secretion	20.03 transport facilities	20.03.02.03.01 proton driven antiporter
estExt_fgenesh1_pm.C_190060	estExt_fgenesh1_pm.C_190060	estExt_fgenesh1_pm.C_190060	scaffold_19:193097-194474	216.098	40.9055	-2.40132	0.00343362	yes
estExt_Genemark1.C_200022	estExt_Genemark1.C_200022	estExt_Genemark1.C_200022	scaffold_20:81744-84799	321.482	60.6512	-2.40613	0.00501525	yes	26134	-	-	3.2.1.14:Chitinase.	KOG2992:Nucleolar GTPase/ATPase p130	endochitinase activity:GO:0008843;;chitinase activity:GO:0004568
gm1.6791_g	gm1.6791_g	gm1.6791_g	scaffold_20:346871-348104	479.446	90.191	-2.41031	0.00435336	yes
estExt_fgenesh1_pg.C_140152	estExt_fgenesh1_pg.C_140152	estExt_fgenesh1_pg.C_140152	scaffold_14:623065-627312	65.3127	12.0897	-2.43359	0.00288118	yes	142050	IPR001965:Zinc finger, PHD-type;;IPR007087:Zinc finger, C2H2-type;;IPR003822:Paired amphipathic helix;;IPR001841:Zinc finger, RING-type;;IPR015880:Zinc finger, C2H2-like;;IPR011011:Zinc finger, FYVE/PHD-type;;IPR002110:Ankyrin	sp|P38806|YNG2_YEAST Chromatin modification-related protein YNG2 OS=Saccharomyces cerevisiae (strain ATCC 204508 / S288c) GN=YNG2 PE=1 SV=1:60.4622	-	KOG1973:Chromatin remodeling protein, contains PHD Zn-finger	nucleic acid binding:GO:0003676;;regulation of transcription, DNA-dependent:GO:0006355;;nucleus:GO:0005634;;zinc ion binding:GO:0008270;;protein binding:GO:0005515;;intracellular:GO:0005622
estExt_Genewise1Plus.C_13_t10407	estExt_Genewise1Plus.C_13_t10407	estExt_Genewise1Plus.C_13_t10407	scaffold_13:545031-547841	43.4732	8.02924	-2.43679	0.00577485	yes	100837	IPR005200:Glycoside hydrolase, family 81	sp|Q09850|ENG2_SCHPO Putative endo-1,3(4)-beta-glucanase 2 OS=Schizosaccharomyces pombe (strain ATCC 38366 / 972) GN=eng2 PE=2 SV=1:521.546	-	KOG2254:Predicted endo-1,3-beta-glucanase	-	01.05 C-compound and carbohydrate metabolism	01.05.03 polysaccharide metabolism	14.10 assembly of protein complexes	40.01 cell growth / morphogenesis	42.04.03 actin cytoskeleton	43.01.03.05 budding, cell polarity and filament formation S.cerevisiae
estExt_Genewise1Plus.C_19_t10485	estExt_Genewise1Plus.C_19_t10485	estExt_Genewise1Plus.C_19_t10485	scaffold_19:563955-566095	53.6312	9.77372	-2.45609	0.00624403	yes	102495	IPR000120:Amidase signature enzyme;;IPR015830:Amidase, fungi type	sp|O59805|YJV7_SCHPO Putative amidase C550.07 OS=Schizosaccharomyces pombe (strain ATCC 38366 / 972) GN=SPCC550.07 PE=2 SV=1:427.943	3.5.1.4:Amidase.	KOG1212:Amidases	amidase activity:GO:0004040;;carbon-nitrogen ligase activity, with glutamine as amido-N-donor:GO:0016884	01.05 C-compound and carbohydrate metabolism	01.05.06.07 C-2 compound and organic acid catabolism S.cerevisiae	02.11 electron transport and membrane-associated energy conservation S.cerevisiae	02.16 fermentation	32.05.03 defense related proteins	42.16 mitochondrion
estExt_fgenesh2_kg.C_100085	estExt_fgenesh2_kg.C_100085	estExt_fgenesh2_kg.C_100085	scaffold_10:731313-732840	335.451	61.1039	-2.45676	0.00309486	yes	123550	IPR004360:Glyoxalase/bleomycin resistance protein/dioxygenase;;IPR005956:4-hydroxyphenylpyruvate dioxygenase	sp|Q872T7|HPPD_NEUCR 4-hydroxyphenylpyruvate dioxygenase OS=Neurospora crassa GN=B23G1.170 PE=3 SV=1:688.337	1.13.11.27:4-hydroxyphenylpyruvate dioxygenase.	KOG0638:4-hydroxyphenylpyruvate dioxygenase	aromatic amino acid family metabolic process:GO:0009072;;4-hydroxyphenylpyruvate dioxygenase activity:GO:0003868	01.01.09 metabolism of the cysteine - aromatic group	01.01.09.01.01 biosynthesis of glycine	01.01.09.04 metabolism of phenylalanine	01.01.09.04.01 biosynthesis of phenylalanine	01.01.09.04.02 degradation of phenylalanine	01.01.09.05 metabolism of tyrosine	01.01.09.05.02 degradation of tyrosine	01.07 metabolism of vitamins, cofactors, and prosthetic groups	16.17 metal binding	16.17.09 heavy metal binding (Cu, Fe, Zn)
estExt_Genemark1.C_270124	estExt_Genemark1.C_270124	estExt_Genemark1.C_270124	scaffold_27:420086-421733	121.853	21.7544	-2.48577	0.00498743	yes	26591	IPR000420:Yeast PIR protein repeat	sp|A6ZQH4|CIS3_YEAS7 Cell wall mannoprotein CIS3 OS=Saccharomyces cerevisiae (strain YJM789) GN=CIS3 PE=3 SV=1:104.375	-	KOG1216:von Willebrand factor and related coagulation proteins	-	42.01 cell wall
estExt_Genewise1Plus.C_1_t40106	estExt_Genewise1Plus.C_1_t40106	estExt_Genewise1Plus.C_1_t40106	scaffold_1:2067717-2068267	1095.66	194.227	-2.49598	0.00283955	yes
fgenesh1_pm.7_#_46	fgenesh1_pm.7_#_46	fgenesh1_pm.7_#_46	scaffold_7:143831-146154	114.204	20.1615	-2.50193	0.00206843	yes	129373	IPR005829:Sugar transporter, conserved site;;IPR002035:von Willebrand factor, type A	sp|Q9GLY5|ITIH3_RABIT Inter-alpha-trypsin inhibitor heavy chain H3 OS=Oryctolagus cuniculus GN=ITIH3 PE=2 SV=1:69.3218	-	-	transporter activity:GO:0005215;;transport:GO:0006810;;membrane:GO:0016020
estExt_Genewise1Plus.C_260159	estExt_Genewise1Plus.C_260159	estExt_Genewise1Plus.C_260159	scaffold_26:207913-208816	142.113	24.9882	-2.50772	0.00537462	yes	103634	IPR006620:Prolyl 4-hydroxylase, alpha subunit;;IPR005123:2OG-Fe(II) oxygenase	-	-	-	protein metabolic process:GO:0019538;;oxidoreductase activity, acting on paired donors, with incorporation or reduction of molecular oxygen, 2-oxoglutarate as one donor, and incorporation of one atom each of oxygen into both donors:GO:0016706
e_gw1.3.1655.1	e_gw1.3.1655.1	e_gw1.3.1655.1	scaffold_3:1411920-1412961	63.3801	10.9855	-2.52842	0.00983494	yes	73249	IPR016040:NAD(P)-binding;;IPR006140:D-isomer specific 2-hydroxyacid dehydrogenase, NAD-binding;;IPR006139:D-isomer specific 2-hydroxyacid dehydrogenase, catalytic region	sp|P52643|LDHD_ECOLI D-lactate dehydrogenase OS=Escherichia coli (strain K12) GN=ldhA PE=1 SV=1:354.369	1.1.1.28:D-lactate dehydrogenase.	KOG0068:D-3-phosphoglycerate dehydrogenase, D-isomer-specific 2-hydroxy acid dehydrogenase superfamily	oxidoreductase activity, acting on the CH-OH group of donors, NAD or NADP as acceptor:GO:0016616;;metabolic process:GO:0008152;;cofactor binding:GO:0048037;;NAD binding:GO:0051287;;D-lactate dehydrogenase activity:GO:0008720;;catalytic activity:GO:0003824;;binding:GO:0005488	02.45 energy conversion and regeneration
fgenesh1_pm.5_#_37	fgenesh1_pm.5_#_37	fgenesh1_pm.5_#_37	scaffold_5:116774-120701	37.1662	6.39777	-2.53835	0.00290106	yes	128499	IPR017442:Serine/threonine protein kinase-related;;IPR000719:Protein kinase, core;;IPR002290:Serine/threonine protein kinase;;IPR011009:Protein kinase-like;;IPR008271:Serine/threonine protein kinase, active site;;IPR001245:Tyrosine protein kinase;;IPR010730:Heterokaryon incompatibility	sp|O14408|KCC1_METAN Calcium/calmodulin-dependent protein kinase OS=Metarhizium anisopliae PE=2 SV=1:71.2478	-	KOG0592:3-phosphoinositide-dependent protein kinase (PDK1)	protein-tyrosine kinase activity:GO:0004713;;ATP binding:GO:0005524;;protein kinase activity:GO:0004672;;protein serine/threonine kinase activity:GO:0004674;;protein amino acid phosphorylation:GO:0006468
e_gw1.3.207.1	e_gw1.3.207.1	e_gw1.3.207.1	scaffold_3:1038680-1040435	41.7886	7.17219	-2.54262	0.00887067	yes	73108	IPR007114:Major facilitator superfamily;;IPR011701:Major facilitator superfamily MFS-1;;IPR016196:MFS general substrate transporter	sp|Q9P6J0|YHDC_SCHPO Uncharacterized transporter C1683.12 OS=Schizosaccharomyces pombe (strain ATCC 38366 / 972) GN=SPBC1683.12 PE=2 SV=1:279.256	-	KOG2533:Permease of the major facilitator superfamily	transporter activity:GO:0005215;;integral to membrane:GO:0016021;;transport:GO:0006810	20.01.03 C-compound and carbohydrate transport	20.01.23 allantoin and allantoate transport	20.01.25 vitamine/cofactor transport	20.09.18 cellular import	20.09.18.07 non-vesicular cellular import	20.03 transport facilities
fgenesh1_pm.15_#_147	fgenesh1_pm.15_#_147	fgenesh1_pm.15_#_147	scaffold_15:526817-528653	123.452	21.1689	-2.54393	0.00220023	yes	131826	IPR016196:MFS general substrate transporter	sp|Q9JHI9|S40A1_MOUSE Solute carrier family 40 member 1 OS=Mus musculus GN=Slc40a1 PE=1 SV=1:149.443	-	KOG2601:Iron transporter	-
e_gw1.43.43.1	e_gw1.43.43.1	e_gw1.43.43.1	scaffold_43:55101-56345	66.4301	11.387	-2.54445	0.00754353	yes	92897	IPR008220:Homoserine acetyltransferase	sp|O27848|METX_METTH Putative homoserine O-acetyltransferase OS=Methanobacterium thermoautotrophicum (strain Delta H) GN=MTH_1820 PE=3 SV=1:90.1225	-	-	cytoplasm:GO:0005737;;O-acetyltransferase activity:GO:0016413
estExt_Genewise1Plus.C_230296	estExt_Genewise1Plus.C_230296	estExt_Genewise1Plus.C_230296	scaffold_23:419824-423094	110.258	18.7731	-2.55414	0.00160281	yes	103267	IPR017805:SAM-dependent methyltransferase, EsaF-type, putative;;IPR005532:Sulphate-modifying factor-like	sp|O94632|MU158_SCHPO Meiotically up-regulated gene 158 protein OS=Schizosaccharomyces pombe (strain ATCC 38366 / 972) GN=mug158 PE=1 SV=4:440.269	-	-	-
estExt_fgenesh1_pg.C_230111	estExt_fgenesh1_pg.C_230111	estExt_fgenesh1_pg.C_230111	scaffold_23:483701-488047	295.786	50.3371	-2.55486	0.00620815	yes	142734	IPR008250:E1-E2 ATPase-associated region;;IPR000695:H+ transporting ATPase, proton pump;;IPR001757:ATPase, P-type, K/Mg/Cd/Cu/Zn/Na/Ca/Na/H-transporter;;IPR005834:Haloacid dehalogenase-like hydrolase;;IPR004014:ATPase, P-type cation-transporter, N-terminal;;IPR006068:ATPase, P-type cation-transporter, C-terminal;;IPR006414:Potassium/sodium efflux P-type ATPase, fungal-type	sp|P22189|ATC3_SCHPO Calcium-transporting ATPase 3 OS=Schizosaccharomyces pombe (strain ATCC 38366 / 972) GN=cta3 PE=1 SV=1:830.476	3.6.3.8:Calcium-transporting ATPase.	KOG0202:Ca2+ transporting ATPase	cation transport:GO:0006812;;integral to membrane:GO:0016021;;ATPase activity, coupled to transmembrane movement of ions, phosphorylative mechanism:GO:0015662;;membrane:GO:0016020;;proton transport:GO:0015992;;hydrolase activity, acting on acid anhydrides, catalyzing transmembrane movement of substances:GO:0016820;;calcium-transporting ATPase activity:GO:0005388;;ATP binding:GO:0005524;;metabolic…	20.01.01 ion transport	20.01.01.01 cation transport (H+, Na+, K+, Ca2+ , NH4+, etc.) N.crassa	20.09 transport routes	32.01.04 pH stress response	34.01.01 homeostasis of cations	34.01.01.01 homeostasis of metal ions (Na, K, Ca etc.) N.crassa	16.17 metal binding	16.17.01 calcium binding	16.17.07 magnesium binding	16.19 nucleotide/nucleoside/nucleobase binding	16.19.03 ATP binding	20.03.22 transport ATPases
fgenesh1_pg.12_#_70	fgenesh1_pg.12_#_70	fgenesh1_pg.12_#_70	scaffold_12:318533-320605	36.9176	6.26947	-2.55789	0.00705982	yes	36354	IPR012734:Dihydroxyacetone kinase;;IPR004007:Dak phosphatase;;IPR004006:Dak kinase	sp|O13902|DAK1_SCHPO Dihydroxyacetone kinase 1 OS=Schizosaccharomyces pombe (strain ATCC 38366 / 972) GN=dak1 PE=2 SV=1:525.783	2.7.1.29:Glycerone kinase.	KOG2426:Dihydroxyacetone kinase/glycerone kinase	ATP binding:GO:0005524;;glycerol metabolic process:GO:0006071;;glycerone kinase activity:GO:0004371	01.04 phosphate metabolism	01.05 C-compound and carbohydrate metabolism	01.05.07 C-3 compound metabolism	01.06 lipid, fatty acid and isoprenoid metabolism S.cerevisiae	32.01 stress response	16.19 nucleotide/nucleoside/nucleobase binding	16.19.03 ATP binding
gm1.3438_g	gm1.3438_g	gm1.3438_g	scaffold_6:1294845-1296273	180.223	30.0973	-2.58208	0.0015122	yes	7882	IPR016084:Haem oxygenase-like, multi-helical	-	-	-	-
e_gw1.16.368.1	e_gw1.16.368.1	e_gw1.16.368.1	scaffold_16:31069-34076	190.006	31.5654	-2.58963	0.00139721	yes
estExt_Genewise1.C_14_t20059	estExt_Genewise1.C_14_t20059	estExt_Genewise1.C_14_t20059	scaffold_14:713619-716195	197.493	32.384	-2.60845	0.00148036	yes	112880	IPR015800:Copper amine oxidase, N2-terminal;;IPR016182:Copper amine oxidase, N-terminal region;;IPR015798:Copper amine oxidase, C-terminal	sp|Q12556|AMO1_ASPNG Copper amine oxidase 1 OS=Aspergillus niger GN=AO-I PE=1 SV=2:711.064	1.4.3.6:Amine oxidase (copper-containing).	KOG1186:Copper amine oxidase	amine metabolic process:GO:0009308;;amine oxidase activity:GO:0008131;;copper ion binding:GO:0005507;;quinone binding:GO:0048038	01.20.17.03 metabolism of amines
estExt_fgenesh2_kg.C_150078	estExt_fgenesh2_kg.C_150078	estExt_fgenesh2_kg.C_150078	scaffold_15:478543-480215	1064.61	162.274	-2.71383	0.00574179	yes
estExt_fgenesh2_kg.C_30017	estExt_fgenesh2_kg.C_30017	estExt_fgenesh2_kg.C_30017	scaffold_3:68192-70550	95.5109	14.4965	-2.71996	0.000870682	yes	122299	IPR001382:Glycoside hydrolase, family 47	sp|Q12563|MNS1B_ASPSA Mannosyl-oligosaccharide alpha-1,2-mannosidase 1B OS=Aspergillus saitoi GN=mns1B PE=2 SV=1:527.709	3.2.1.113:Mannosyl-oligosaccharide 1,2-alpha-mannosidase.	KOG2431:1, 2-alpha-mannosidase	calcium ion binding:GO:0005509;;membrane:GO:0016020;;mannosyl-oligosaccharide 1,2-alpha-mannosidase activity:GO:0004571	01.05 C-compound and carbohydrate metabolism	14.07.02 modification with sugar residues (e.g. glycosylation, deglycosylation) N.crassa	14.07.02.02 N-directed glycosylation, deglycosylation S.cerevisiae
estExt_Genemark1.C_2_t10292	estExt_Genemark1.C_2_t10292	estExt_Genemark1.C_2_t10292	scaffold_2:1070109-1071457	175.746	26.614	-2.72323	0.000816801	yes	23689	IPR005198:Glycoside hydrolase, family 76;;IPR008928:Six-hairpin glycosidase-like;;IPR016130:Protein-tyrosine phosphatase, active site	sp|Q9P6I3|YHG7_SCHPO Putative mannan endo-1,6-alpha-mannosidase C1198.07c OS=Schizosaccharomyces pombe (strain ATCC 38366 / 972) GN=SPBC1198.07c PE=2 SV=1:78.5666	-	-	dephosphorylation:GO:0016311;;phosphoric monoester hydrolase activity:GO:0016791;;catalytic activity:GO:0003824;;protein tyrosine phosphatase activity:GO:0004725	01.05.03 polysaccharide metabolism
fgenesh1_pm.2_#_512	fgenesh1_pm.2_#_512	fgenesh1_pm.2_#_512	scaffold_2:1772063-1774896	33.6872	5.01123	-2.74896	0.00190647	yes	127187	IPR017853:Glycoside hydrolase, catalytic core;;IPR002016:Haem peroxidase, plant/fungal/bacterial;;IPR006102:Glycoside hydrolase family 2, immunoglobulin-like beta-sandwich;;IPR008979:Galactose-binding like	sp|B8NW36|MANBB_ASPFN Probable beta-mannosidase B OS=Aspergillus flavus (strain ATCC 200026 / FGSC A1120 / NRRL 3357 / JCM 12722 / SRRC 167) GN=mndB PE=3 SV=1:804.283	3.2.1.25:Beta-mannosidase.	KOG2230:Predicted beta-mannosidase	hydrolase activity, hydrolyzing O-glycosyl compounds:GO:0004553;;response to oxidative stress:GO:0006979;;carbohydrate metabolic process:GO:0005975;;electron transport:GO:0006118;;peroxidase activity:GO:0004601;;heme binding:GO:0020037;;beta-mannosidase activity:GO:0004567	01.05.03 polysaccharide metabolism
estExt_fgenesh1_pg.C_50139	estExt_fgenesh1_pg.C_50139	estExt_fgenesh1_pg.C_50139	scaffold_5:519975-522617	251.492	37.0542	-2.7628	0.00062554	yes	140778	IPR007219:Fungal specific transcription factor;;IPR001138:Fungal transcriptional regulatory protein, N-terminal	sp|Q10086|YAO7_SCHPO Uncharacterized transcriptional regulatory protein C11D3.07c OS=Schizosaccharomyces pombe (strain ATCC 38366 / 972) GN=SPAC11D3.07c PE=2 SV=3:98.9821	-	-	regulation of transcription, DNA-dependent:GO:0006355;;nucleus:GO:0005634;;zinc ion binding:GO:0008270;;transcription:GO:0006350;;DNA binding:GO:0003677;;transcription factor activity:GO:0003700
estExt_fgenesh2_kg.C_100063	estExt_fgenesh2_kg.C_100063	estExt_fgenesh2_kg.C_100063	scaffold_10:629111-629697	238.624	34.8957	-2.77362	0.00206843	yes
e_gw1.4.150.1	e_gw1.4.150.1	e_gw1.4.150.1	scaffold_4:103856-105707	28.2891	4.11785	-2.78028	0.00451438	yes
estExt_fgenesh1_pg.C_3_t10323	estExt_fgenesh1_pg.C_3_t10323	estExt_fgenesh1_pg.C_3_t10323	scaffold_3:1188449-1190916	87.9345	12.7594	-2.78487	0.000600302	yes	140500	IPR001401:Dynamin, GTPase region	sp|Q6PW23|MX_EPICO Interferon-induced GTP-binding protein Mx OS=Epinephelus coioides GN=mx PE=2 SV=1:151.369	-	KOG0446:Vacuolar sorting protein VPS1, dynamin, and related proteins	GTPase activity:GO:0003924;;GTP binding:GO:0005525;;dynamin GTPase activity:GO:0008549	32.05.01 resistance proteins
e_gw1.21.212.1	e_gw1.21.212.1	e_gw1.21.212.1	scaffold_21:44857-47663	33.1127	4.75924	-2.79858	0.0017532	yes	87529	IPR006650:Adenosine/AMP deaminase active site;;IPR006329:AMP deaminase;;IPR001365:Adenosine/AMP deaminase	sp|P50998|AMPD_SCHPO AMP deaminase OS=Schizosaccharomyces pombe (strain ATCC 38366 / 972) GN=ada1 PE=1 SV=2:842.417	3.5.4.6:AMP deaminase.	KOG1096:Adenosine monophosphate deaminase	purine ribonucleoside monophosphate biosynthetic process:GO:0009168;;AMP deaminase activity:GO:0003876;;deaminase activity:GO:0019239	01.03.01 purin nucleotide/nucleoside/nucleobase metabolism N.crassa	01.04 phosphate metabolism	02.45 energy conversion and regeneration
estExt_Genewise1Plus.C_11_t10108	estExt_Genewise1Plus.C_11_t10108	estExt_Genewise1Plus.C_11_t10108	scaffold_11:148967-150389	261.688	36.9316	-2.82492	0.000432676	yes	99979	-	-	-	KOG4597:Serine proteinase inhibitor (KU family) with thrombospondin repeats	-
e_gw1.9.136.1	e_gw1.9.136.1	e_gw1.9.136.1	scaffold_9:1061730-1063730	44.7704	6.23228	-2.84471	0.00201397	yes	79984	IPR005828:General substrate transporter;;IPR007114:Major facilitator superfamily;;IPR003663:Sugar transporter;;IPR016196:MFS general substrate transporter	sp|P07921|LACP_KLULA Lactose permease OS=Kluyveromyces lactis (strain ATCC 8585 / CBS 2359 / DSM 70799 / NBRC 1267 / NRRL Y-1140 / WM37) GN=LAC12 PE=3 SV=1:297.745	5.3.1.4:L-arabinose isomerase.	KOG0254:Predicted transporter (major facilitator superfamily)	sugar:hydrogen symporter activity:GO:0005351;;L-arabinose isomerase activity:GO:0008733;;carbohydrate transport:GO:0008643;;transporter activity:GO:0005215;;integral to membrane:GO:0016021;;transport:GO:0006810;;membrane:GO:0016020	20.01.03 C-compound and carbohydrate transport	20.01.03.01 sugar transport	20.09.18 cellular import	20.09.18.07 non-vesicular cellular import
estExt_Genewise1.C_3_t30356	estExt_Genewise1.C_3_t30356	estExt_Genewise1.C_3_t30356	scaffold_3:1605094-1607201	38.681	5.37809	-2.84646	0.00204443	yes	108243	-	-	-	KOG3417:Ras1 guanine nucleotide exchange factor	-
fgenesh2_kg.4_#_70_#_gi|30111154|gb|CB896496.1|CB896496	fgenesh2_kg.4_#_70_#_gi|30111154|gb|CB896496.1|CB896496	fgenesh2_kg.4_#_70_#_gi|30111154|gb|CB896496.1|CB896496	scaffold_4:883632-884137	1425.48	197.755	-2.84966	0.000385148	yes
fgenesh1_pg.18_#_137	fgenesh1_pg.18_#_137	fgenesh1_pg.18_#_137	scaffold_18:588186-591797	20.2824	2.77853	-2.86784	0.0017532	yes	37645	-	-	-	KOG3544:Collagens (type IV and type XIII), and related proteins	-
estExt_Genemark1.C_1_t20455	estExt_Genemark1.C_1_t20455	estExt_Genemark1.C_1_t20455	scaffold_1:3388062-3390134	21.1242	2.88307	-2.87322	0.00501399	yes	23523	IPR003673:CoA-transferase family III	sp|Q7TNE1|CG010_MOUSE CaiB/baiF CoA-transferase family protein C7orf10 homolog OS=Mus musculus PE=2 SV=1:90.8929	-	KOG3957:Predicted L-carnitine dehydratase/alpha-methylacyl-CoA racemase	metabolic process:GO:0008152;;catalytic activity:GO:0003824
e_gw1.4.1166.1	e_gw1.4.1166.1	e_gw1.4.1166.1	scaffold_4:891062-891617	945.319	126.947	-2.89657	0.000296121	yes
estExt_Genemark1.C_230075	estExt_Genemark1.C_230075	estExt_Genemark1.C_230075	scaffold_23:341786-345020	305.215	40.7924	-2.90345	0.000797063	yes	26373	IPR003864:Protein of unknown function DUF221	sp|Q03516|RSN1_YEAST Uncharacterized protein RSN1 OS=Saccharomyces cerevisiae (strain ATCC 204508 / S288c) GN=RSN1 PE=1 SV=1:536.184	-	KOG1134:Uncharacterized conserved protein	membrane:GO:0016020
estExt_Genewise1Plus.C_440032	estExt_Genewise1Plus.C_440032	estExt_Genewise1Plus.C_440032	scaffold_44:44316-47095	956.789	127.766	-2.9047	0.00633901	yes	105117	IPR001138:Fungal transcriptional regulatory protein, N-terminal	-	-	KOG4293:Predicted membrane protein, contains DoH and Cytochrome b-561/ferric reductase transmembrane domains	regulation of transcription, DNA-dependent:GO:0006355;;nucleus:GO:0005634;;zinc ion binding:GO:0008270;;transcription factor activity:GO:0003700
estExt_Genewise1.C_12_t10245	estExt_Genewise1.C_12_t10245	estExt_Genewise1.C_12_t10245	scaffold_12:355424-356618	44.869	5.95521	-2.91349	0.00537058	yes
gm1.6544_g	gm1.6544_g	gm1.6544_g	scaffold_19:137087-139061	42.28	5.59522	-2.91771	0.00119995	yes	10988	IPR001854:Ribosomal protein L29	-	-	-	ribosome:GO:0005840;;structural constituent of ribosome:GO:0003735;;translation:GO:0006412;;intracellular:GO:0005622
e_gw1.31.21.1	e_gw1.31.21.1	e_gw1.31.21.1	scaffold_31:173861-175804	266.055	34.7268	-2.9376	0.000250259	yes	91065	IPR001204:Phosphate transporter	sp|P15710|PHO4_NEUCR Phosphate-repressible phosphate permease OS=Neurospora crassa GN=pho-4 PE=3 SV=1:401.749	-	KOG2493:Na+/Pi symporter	phosphate transport:GO:0006817;;inorganic phosphate transmembrane transporter activity:GO:0005315;;membrane:GO:0016020	20.01.01.07.07 phosphate transport	34.01.01 homeostasis of cations	34.01.03.03 homeostasis of phosphate	20.03.02.02.02 sodium driven symporter
gw1.24.252.1	gw1.24.252.1	gw1.24.252.1	scaffold_24:318759-321380	21.025	2.73196	-2.94409	0.00220023	yes	55114	IPR003593:AAA+ ATPase, core;;IPR003959:AAA ATPase, core	sp|Q5T9A4|ATD3B_HUMAN ATPase family AAA domain-containing protein 3B OS=Homo sapiens GN=ATAD3B PE=1 SV=1:59.3066	-	KOG0742:AAA+-type ATPase	ATP binding:GO:0005524;;nucleoside-triphosphatase activity:GO:0017111;;nucleotide binding:GO:0000166
fgenesh1_pm.7_#_280	fgenesh1_pm.7_#_280	fgenesh1_pm.7_#_280	scaffold_7:956660-957425	231.178	29.7141	-2.95978	0.00498743	yes	129607	IPR006056:YjgF-like protein;;IPR006175:Endoribonuclease L-PSP;;IPR013813:Endoribonuclease L-PSP/chorismate mutase-like	sp|O58584|Y854_PYRHO RutC family protein PH0854 OS=Pyrococcus horikoshii (strain ATCC 700860 / DSM 12428 / JCM 9974 / NBRC 100139 / OT-3) GN=PH0854 PE=1 SV=2:142.895	-	KOG2317:Putative translation initiation inhibitor UK114/IBM1	-	01.01.11.02.01 biosynthesis of isoleucine	01.03.01 purin nucleotide/nucleoside/nucleobase metabolism L.innocua	11.02.03.04 transcriptional control	32.01 stress response	32.01.05 heat shock response	34.11.03.07 pheromone response, mating-type determination, sex-specific proteins N.crassa	42.16 mitochondrion
estExt_Genewise1.C_14_t10433	estExt_Genewise1.C_14_t10433	estExt_Genewise1.C_14_t10433	scaffold_14:584406-585686	134.793	17.165	-2.9732	0.000382386	yes	112810	IPR016040:NAD(P)-binding;;IPR002347:Glucose/ribitol dehydrogenase;;IPR002198:Short-chain dehydrogenase/reductase SDR	sp|Q9ERI6|RDH14_MOUSE Retinol dehydrogenase 14 OS=Mus musculus GN=Rdh14 PE=1 SV=1:87.8113	1.1.-.-:Acting on the CH-OH group of donors.	KOG1208:Dehydrogenases with different specificities (related to short-chain alcohol dehydrogenases)	ketoreductase activity:GO:0045703;;hydroxymethylmethylsilanediol oxidase activity:GO:0018448;;1-phenylethanol dehydrogenase activity:GO:0018449;;metabolic process:GO:0008152;;catalytic activity:GO:0003824;;myrtenol dehydrogenase activity:GO:0018450;;oxidoreductase activity:GO:0016491;;binding:GO:0005488;;pinocarveol dehydrogenase activity:GO:0018446;;chloral hydrate dehydrogenase activity:GO:0018…	01.07 metabolism of vitamins, cofactors, and prosthetic groups	34.11.01 photoperception and response
estExt_Genewise1Plus.C_1_t50475	estExt_Genewise1Plus.C_1_t50475	estExt_Genewise1Plus.C_1_t50475	scaffold_1:3115775-3117807	51.6254	6.46236	-2.99795	0.000730065	yes	94877	IPR005197:Glycoside hydrolase, family 71	sp|O13716|AGN1_SCHPO Glucan endo-1,3-alpha-glucosidase agn1 OS=Schizosaccharomyces pombe (strain ATCC 38366 / 972) GN=agn1 PE=1 SV=2:163.696	3.2.1.59:Glucan endo-1,3-alpha-glucosidase.	KOG4297:C-type lectin	glucan endo-1,3-alpha-glucosidase activity:GO:0051118
e_gw1.13.48.1	e_gw1.13.48.1	e_gw1.13.48.1	scaffold_13:2131-2758	54.3319	6.79372	-2.99953	0.00746891	yes	82984	IPR009009:Barwin-related endoglucanase	-	-	-	-
e_gw1.24.248.1	e_gw1.24.248.1	e_gw1.24.248.1	scaffold_24:63409-65381	17.2788	2.14374	-3.0108	0.00504588	yes	88629	IPR000873:AMP-dependent synthetase and ligase	sp|Q4G176|ACSF3_HUMAN Acyl-CoA synthetase family member 3, mitochondrial OS=Homo sapiens GN=ACSF3 PE=1 SV=3:137.502	6.2.1.12:4-coumarate--CoA ligase.	KOG1176:Acyl-CoA synthetase	4-coumarate-CoA ligase activity:GO:0016207;;metabolic process:GO:0008152;;catalytic activity:GO:0003824
estExt_fgenesh2_kg.C_50138	estExt_fgenesh2_kg.C_50138	estExt_fgenesh2_kg.C_50138	scaffold_5:1295302-1295958	258.528	31.9896	-3.01465	0.000484322	yes
e_gw1.30.357.1	e_gw1.30.357.1	e_gw1.30.357.1	scaffold_30:179042-180524	32.6535	4.02634	-3.01969	0.00219571	yes	90737	-	sp|Q5UQ60|YL662_MIMIV Uncharacterized protein L662 OS=Acanthamoeba polyphaga mimivirus GN=MIMI_L662 PE=4 SV=1:70.8626	-	-	-
fgenesh1_pg.6_#_331	fgenesh1_pg.6_#_331	fgenesh1_pg.6_#_331	scaffold_6:1149229-1149675	1155.16	142.235	-3.02175	0.000581713	yes
fgenesh1_pm.4_#_263	fgenesh1_pm.4_#_263	fgenesh1_pm.4_#_263	scaffold_4:887107-888837	59.8036	7.24356	-3.04546	0.000681311	yes	128266	IPR001138:Fungal transcriptional regulatory protein, N-terminal	-	-	-	regulation of transcription, DNA-dependent:GO:0006355;;nucleus:GO:0005634;;zinc ion binding:GO:0008270;;transcription factor activity:GO:0003700
estExt_fgenesh2_kg.C_180072	estExt_fgenesh2_kg.C_180072	estExt_fgenesh2_kg.C_180072	scaffold_18:526659-527796	47.381	5.7259	-3.04873	0.00226902	yes	124397	IPR007577:Glycosyltransferase sugar-binding region containing DXD motif	sp|Q9UTR6|OCH1_SCHPO Initiation-specific alpha-1,6-mannosyltransferase OS=Schizosaccharomyces pombe (strain ATCC 38366 / 972) GN=och1 PE=1 SV=2:144.05	-	-	glycolipid 6-alpha-mannosyltransferase activity:GO:0033164
e_gw1.30.209.1	e_gw1.30.209.1	e_gw1.30.209.1	scaffold_30:19326-21006	13.3307	1.59693	-3.06138	0.00917793	yes	90719	IPR007114:Major facilitator superfamily;;IPR011701:Major facilitator superfamily MFS-1;;IPR016196:MFS general substrate transporter	sp|Q9US44|YIZG_SCHPO Uncharacterized transporter C1002.16c OS=Schizosaccharomyces pombe (strain ATCC 38366 / 972) GN=SPAC1002.16c PE=2 SV=1:217.238	-	KOG2533:Permease of the major facilitator superfamily	transporter activity:GO:0005215;;integral to membrane:GO:0016021;;transport:GO:0006810	20.01.03 C-compound and carbohydrate transport	20.01.23 allantoin and allantoate transport	20.01.25 vitamine/cofactor transport	20.09.18 cellular import	20.09.18.07 non-vesicular cellular import	20.03 transport facilities
estExt_Genewise1.C_6_t30020	estExt_Genewise1.C_6_t30020	estExt_Genewise1.C_6_t30020	scaffold_6:1130944-1131769	1122.43	133.385	-3.07296	0.000192649	yes
estExt_Genewise1Plus.C_8_t10238	estExt_Genewise1Plus.C_8_t10238	estExt_Genewise1Plus.C_8_t10238	scaffold_8:284908-287926	92.9034	10.9962	-3.07873	0.000120493	yes	98836	IPR009007:Peptidase aspartic, catalytic	-	-	KOG1187:Serine/threonine protein kinase	aspartic-type endopeptidase activity:GO:0004190;;proteolysis:GO:0006508
gm1.7448_g	gm1.7448_g	gm1.7448_g	scaffold_25:76844-78185	14.689	1.73522	-3.08154	0.00846033	yes	11892	IPR005338:Protein of unknown function UPF0075	sp|Q8RD30|ANMK_THETN Anhydro-N-acetylmuramic acid kinase OS=Thermoanaerobacter tengcongensis GN=anmK PE=3 SV=1:251.906	-	-	-
fgenesh1_pg.31_#_24	fgenesh1_pg.31_#_24	fgenesh1_pg.31_#_24	scaffold_31:77514-79093	17.4481	2.05374	-3.08674	0.0052115	yes	39240	IPR016161:Aldehyde/histidinol dehydrogenase;;IPR016160:Aldehyde dehydrogenase, conserved site;;IPR015590:Aldehyde dehydrogenase	sp|Q9URW9|YLX7_SCHPO Putative aldehyde dehydrogenase-like protein C922.07c OS=Schizosaccharomyces pombe (strain ATCC 38366 / 972) GN=SPAC922.07c PE=2 SV=1:305.064	1.2.1.3:Aldehyde dehydrogenase (NAD+).	KOG2450:Aldehyde dehydrogenase	metabolic process:GO:0008152;;aldehyde dehydrogenase (NAD) activity:GO:0004029;;oxidoreductase activity:GO:0016491	01.01 amino acid metabolism	01.01.03.02 metabolism of glutamate	01.01.03.02.02 degradation of glutamate	01.01.03.03.01 biosynthesis of proline	01.01.05.01.02 degradation of polyamines	01.01.09.04.01 biosynthesis of phenylalanine	01.01.09.05 metabolism of tyrosine	01.01.11 metabolism of the pyruvate family (alanine, isoleucine, leucine, valine) and D-alanine B.subtilis	01.02 nitrogen, sulfur and selenium metabolism B.subtilis	01.05 C-compound and carbohydrate metabolism	01.05.06.07 C-2 compound and organic acid catabolism S.cerevisiae	01.05.11.07.01 aerobic aromate catabolism	01.06 lipid, fatty acid and isoprenoid metabolism	01.06.06 isoprenoid metabolism	01.07 metabolism of vitamins, cofactors, and prosthetic groups N.crassa	01.07.01 biosynthesis of vitamins, cofactors, and prosthetic groups	01.20 secondary metabolism	01.20.05 metabolism of acetic acid derivatives	01.20.17.01 metabolism of nonprotein amino acids	01.20.29 metabolism of secondary products derived from L-glutamic acid, L-proline and L-ornithine	01.20.31 metabolism of secondary products derived from L-lysine, L-arginine and L-histidine	02.11 electron transport and membrane-associated energy conservation S.cerevisiae	02.13 respiration	02.16 fermentation	02.16.01 alcohol fermentation	02.45 energy conversion and regeneration	20.01.15 electron transport	32.01 stress response	32.01.01 oxidative stress response	32.01.03 osmotic and salt stress response	32.05.01 resistance proteins	32.05.03 defense related proteins	32.07.03 detoxification by modification	32.07.09 detoxification by degradation	42.16 mitochondrion
e_gw1.17.226.1	e_gw1.17.226.1	e_gw1.17.226.1	scaffold_17:460453-462286	13.489	1.57962	-3.09413	0.00607786	yes	85254	IPR005828:General substrate transporter;;IPR007114:Major facilitator superfamily;;IPR003663:Sugar transporter;;IPR016196:MFS general substrate transporter;;IPR005829:Sugar transporter, conserved site	sp|Q4U3U4|QAY_NEUTR Quinate permease OS=Neurospora terricola GN=qa-y PE=3 SV=1:232.646	5.3.1.4:L-arabinose isomerase.	KOG0254:Predicted transporter (major facilitator superfamily)	sugar:hydrogen symporter activity:GO:0005351;;L-arabinose isomerase activity:GO:0008733;;carbohydrate transport:GO:0008643;;transporter activity:GO:0005215;;integral to membrane:GO:0016021;;transport:GO:0006810;;membrane:GO:0016020	20.01.03 C-compound and carbohydrate transport	20.09.18.07 non-vesicular cellular import
gw1.15.44.1	gw1.15.44.1	gw1.15.44.1	scaffold_15:572432-574577	91.5592	10.4196	-3.13541	0.000117442	yes	42804	IPR006693:AB-hydrolase associated lipase region	sp|Q07950|YEH2_YEAST Sterol esterase 2 OS=Saccharomyces cerevisiae (strain ATCC 204508 / S288c) GN=YEH2 PE=1 SV=1:259.61	-	KOG2624:Triglyceride lipase-cholesterol esterase	lipid metabolic process:GO:0006629	01.06 lipid, fatty acid and isoprenoid metabolism N.crassa
estExt_Genewise1Plus.C_9_t10299	estExt_Genewise1Plus.C_9_t10299	estExt_Genewise1Plus.C_9_t10299	scaffold_9:368043-370101	143.908	16.3215	-3.1403	8.94196e-05	yes	99285	IPR001540:Glycoside hydrolase, family 20;;IPR017853:Glycoside hydrolase, catalytic core;;IPR015882:Beta-N-acetylhexosaminidase-like;;IPR015883:Glycoside hydrolase, family 20, catalytic core	sp|P49010|HEXC_BOMMO Chitooligosaccharidolytic beta-N-acetylglucosaminidase OS=Bombyx mori PE=1 SV=1:251.521	3.2.1.52:Beta-N-acetylhexosaminidase.	KOG2499:Beta-N-acetylhexosaminidase	carbohydrate metabolic process:GO:0005975;;beta-N-acetylhexosaminidase activity:GO:0004563;;beta-N-acetylglucosaminidase activity:GO:0016231	01.05.03 polysaccharide metabolism
estExt_Genemark1.C_260001	estExt_Genemark1.C_260001	estExt_Genemark1.C_260001	scaffold_26:2454-3583	136.436	15.3755	-3.14952	0.000214241	yes	26479	IPR016040:NAD(P)-binding;;IPR013154:Alcohol dehydrogenase GroES-like;;IPR013149:Alcohol dehydrogenase, zinc-binding;;IPR011032:GroES-like	sp|O94564|YGD6_SCHPO Zinc-type alcohol dehydrogenase-like protein C1773.06c OS=Schizosaccharomyces pombe (strain ATCC 38366 / 972) GN=SPBC1773.06c PE=2 SV=1:289.271	1.1.1.1:Alcohol dehydrogenase.	KOG1198:Zinc-binding oxidoreductase	metabolic process:GO:0008152;;alcohol dehydrogenase activity, iron-dependent:GO:0004025;;alcohol dehydrogenase activity, metal ion-independent:GO:0004023;;catalytic activity:GO:0003824;;alcohol dehydrogenase activity, zinc-dependent:GO:0004024;;binding:GO:0005488;;alcohol dehydrogenase activity:GO:0004022
estExt_fgenesh1_pm.C_3_t10428	estExt_fgenesh1_pm.C_3_t10428	estExt_fgenesh1_pm.C_3_t10428	scaffold_3:1435435-1437628	451.17	50.8328	-3.14984	0.000218154	yes	136286	IPR008973:C2 calcium/lipid-binding region, CaLB;;IPR000008:C2 calcium-dependent membrane targeting	-	-	-	-
gm1.4076_g	gm1.4076_g	gm1.4076_g	scaffold_8:762898-763468	257.128	28.9546	-3.15063	0.000719538	yes
estExt_Genemark1.C_440012	estExt_Genemark1.C_440012	estExt_Genemark1.C_440012	scaffold_44:47189-48149	58.0927	6.51925	-3.15558	0.00206767	yes	27007	IPR000991:Glutamine amidotransferase class-I, C-terminal	sp|Q09686|YA14_SCHPO Putative glutamine amidotransferase-like protein C13C5.04 OS=Schizosaccharomyces pombe (strain ATCC 38366 / 972) GN=SPAC13C5.04 PE=2 SV=1:156.762	-	KOG3179:Predicted glutamine synthetase	catalytic activity:GO:0003824
e_gw1.6.351.1	e_gw1.6.351.1	e_gw1.6.351.1	scaffold_6:902542-904789	71.8395	8.03995	-3.15952	0.000168293	yes	76757	IPR011160:Sphingomyelin phosphodiesterase;;IPR011001:Saposin-like;;IPR004843:Metallophosphoesterase	sp|Q04519|ASM_MOUSE Sphingomyelin phosphodiesterase OS=Mus musculus GN=Smpd1 PE=2 SV=2:252.677	3.1.4.12:Sphingomyelin phosphodiesterase.	KOG3770:Acid sphingomyelinase and PHM5 phosphate metabolism protein	sphingomyelin phosphodiesterase activity:GO:0004767;;hydrolase activity:GO:0016787;;sphingomyelin catabolic process:GO:0006685	01.06 lipid, fatty acid and isoprenoid metabolism	01.06.02.01 phospholipid metabolism
e_gw1.5.454.1	e_gw1.5.454.1	e_gw1.5.454.1	scaffold_5:1230250-1230669	162.72	18.2097	-3.15961	0.00787094	yes
gm1.3489_g	gm1.3489_g	gm1.3489_g	scaffold_7:39683-41603	108.468	12.1381	-3.15964	0.0001213	yes
e_gw1.21.284.1	e_gw1.21.284.1	e_gw1.21.284.1	scaffold_21:254239-255622	23.3966	2.60924	-3.1646	0.0027297	yes	87321	IPR002155:Thiolase;;IPR016039:Thiolase-like;;IPR013751:3-Oxoacyl-[acyl-carrier-protein (ACP)] synthase III	sp|Q07598|NLTP_CHICK Non-specific lipid-transfer protein (Fragment) OS=Gallus gallus GN=SCP2 PE=2 SV=1:441.425	2.3.1.16:Acetyl-CoA C-acyltransferase.	KOG1406:Peroxisomal 3-ketoacyl-CoA-thiolase P-44/SCP2	metabolic process:GO:0008152;;catalytic activity:GO:0003824;;acetyl-CoA C-acyltransferase activity:GO:0003988	20.01.13 lipid/fatty acid transport	20.09 transport routes	16.09 lipid binding
e_gw1.1.2349.1	e_gw1.1.2349.1	e_gw1.1.2349.1	scaffold_1:164190-166273	24.8854	2.76164	-3.1717	0.00153468	yes	68277	IPR005828:General substrate transporter;;IPR007114:Major facilitator superfamily;;IPR003663:Sugar transporter;;IPR016196:MFS general substrate transporter;;IPR005829:Sugar transporter, conserved site	sp|P10870|SNF3_YEAST High-affinity glucose transporter SNF3 OS=Saccharomyces cerevisiae (strain ATCC 204508 / S288c) GN=SNF3 PE=1 SV=3:226.868	5.3.1.4:L-arabinose isomerase.	KOG0254:Predicted transporter (major facilitator superfamily)	sugar:hydrogen symporter activity:GO:0005351;;L-arabinose isomerase activity:GO:0008733;;carbohydrate transport:GO:0008643;;transporter activity:GO:0005215;;integral to membrane:GO:0016021;;transport:GO:0006810;;membrane:GO:0016020	01.05.25 regulation of C-compound and carbohydrate metabolism N.crassa	20.01.03 C-compound and carbohydrate transport	20.01.03.01 sugar transport	20.09.18 cellular import	20.09.18.07 non-vesicular cellular import	34.01.01.03 homeostasis of protons	34.11.12 perception of nutrients and nutritional adaptation N.crassa	20.03 transport facilities	20.03.02.02.01 proton driven symporter
estExt_Genewise1Plus.C_3_t30487	estExt_Genewise1Plus.C_3_t30487	estExt_Genewise1Plus.C_3_t30487	scaffold_3:1746812-1747566	82.2967	9.10322	-3.17639	0.00276939	yes
estExt_Genewise1Plus.C_5_t10307	estExt_Genewise1Plus.C_5_t10307	estExt_Genewise1Plus.C_5_t10307	scaffold_5:355367-357447	20.9649	2.31861	-3.17664	0.00150217	yes	97308	IPR013027:FAD-dependent pyridine nucleotide-disulphide oxidoreductase;;IPR002938:Monooxygenase, FAD-binding;;IPR001327:Pyridine nucleotide-disulphide oxidoreductase, NAD-binding region;;IPR001100:Pyridine nucleotide-disulphide oxidoreductase, class I	sp|Q9FVQ0|YUC10_ARATH Flavin-containing monooxygenase YUCCA10 OS=Arabidopsis thaliana GN=YUC10 PE=2 SV=1:132.494	-	KOG1399:Flavin-containing monooxygenase	aromatic compound metabolic process:GO:0006725;;FAD binding:GO:0050660;;electron transport:GO:0006118;;monooxygenase activity:GO:0004497;;oxidoreductase activity:GO:0016491
e_gw1.14.613.1	e_gw1.14.613.1	e_gw1.14.613.1	scaffold_14:231822-232839	28.2614	3.10605	-3.18568	0.00360155	yes	83358	IPR000923:Blue (type 1) copper domain	-	-	KOG2806:Chitinase	electron transport:GO:0006118;;copper ion binding:GO:0005507;;electron carrier activity:GO:0009055
estExt_fgenesh1_pg.C_210030	estExt_fgenesh1_pg.C_210030	estExt_fgenesh1_pg.C_210030	scaffold_21:131658-133320	39.5799	4.2373	-3.22355	0.000730065	yes	142573	-	sp|P53933|APP1_YEAST Actin patch protein 1 OS=Saccharomyces cerevisiae (strain ATCC 204508 / S288c) GN=APP1 PE=1 SV=1:76.2554	-	-	-
e_gw1.7.830.1	e_gw1.7.830.1	e_gw1.7.830.1	scaffold_7:571646-572451	107.413	11.4486	-3.22993	0.000618487	yes	77893	IPR000791:GPR1/FUN34/yaaH	sp|P32907|ATO2_YEAST Ammonia transport outward protein 2 OS=Saccharomyces cerevisiae (strain ATCC 204508 / S288c) GN=ATO2 PE=1 SV=1:120.553	-	-	membrane:GO:0016020	01.02 nitrogen, sulfur and selenium metabolism S.cerevisiae	01.03.16.03 DNA degradation	01.05.25 regulation of C-compound and carbohydrate metabolism S.cerevisiae	10.01 DNA processing	10.03.02 meiosis	20.01.01.01 cation transport (H+, Na+, K+, Ca2+ , NH4+, etc.) S.cerevisiae	20.01.03 C-compound and carbohydrate transport	20.03 transport facilities	20.03.02.03.01 proton driven antiporter
estExt_Genewise1Plus.C_270315	estExt_Genewise1Plus.C_270315	estExt_Genewise1Plus.C_270315	scaffold_27:345345-349094	20.458	2.17679	-3.23239	0.000360967	yes	103853	IPR002345:Lipocalin;;IPR002110:Ankyrin	sp|Q1RHT6|Y997_RICBR Putative ankyrin repeat protein RBE_0997 OS=Rickettsia bellii (strain RML369-C) GN=RBE_0997 PE=4 SV=1:73.9442	-	KOG4177:Ankyrin	transporter activity:GO:0005215;;transport:GO:0006810;;binding:GO:0005488
estExt_fgenesh1_pm.C_140179	estExt_fgenesh1_pm.C_140179	estExt_fgenesh1_pm.C_140179	scaffold_14:614168-618974	14.298	1.51401	-3.23937	0.000367992	yes	138024	IPR003593:AAA+ ATPase, core;;IPR003439:ABC transporter-like	sp|Q8R420|ABCA3_MOUSE ATP-binding cassette sub-family A member 3 OS=Mus musculus GN=Abca3 PE=2 SV=2:186.808;;sp|Q8R420|ABCA3_MOUSE ATP-binding cassette sub-family A member 3 OS=Mus musculus GN=Abca3 PE=2 SV=2:146.747;;sp|Q8R420|ABCA3_MOUSE ATP-binding cassette sub-family A member 3 OS=Mus musculus GN=Abca3 PE=2 SV=2:381.333	-	KOG0059:Lipid exporter ABCA1 and related proteins, ABC superfamily	nucleoside-triphosphatase activity:GO:0017111;;ATP binding:GO:0005524;;ATPase activity:GO:0016887;;nucleotide binding:GO:0000166	16.19.03 ATP binding	20.03.25 ABC transporters
estExt_Genewise1Plus.C_14_t20043	estExt_Genewise1Plus.C_14_t20043	estExt_Genewise1Plus.C_14_t20043	scaffold_14:698569-700828	55.509	5.86715	-3.24199	0.000168293	yes	101246	IPR005828:General substrate transporter;;IPR007114:Major facilitator superfamily;;IPR003663:Sugar transporter;;IPR016196:MFS general substrate transporter;;IPR005829:Sugar transporter, conserved site	sp|Q9XIH7|PLT1_ARATH Putative polyol transporter 1 OS=Arabidopsis thaliana GN=PLT1 PE=2 SV=1:187.963	5.3.1.4:L-arabinose isomerase.	KOG0254:Predicted transporter (major facilitator superfamily)	sugar:hydrogen symporter activity:GO:0005351;;L-arabinose isomerase activity:GO:0008733;;carbohydrate transport:GO:0008643;;transporter activity:GO:0005215;;integral to membrane:GO:0016021;;transport:GO:0006810;;membrane:GO:0016020	01.05 C-compound and carbohydrate metabolism	01.06 lipid, fatty acid and isoprenoid metabolism N.crassa	20.01.03 C-compound and carbohydrate transport	20.01.13 lipid/fatty acid transport	20.09.16 cellular export and secretion	20.09.18 cellular import	20.09.18.07 non-vesicular cellular import	20.03 transport facilities
estExt_fgenesh1_pg.C_1_t20011	estExt_fgenesh1_pg.C_1_t20011	estExt_fgenesh1_pg.C_1_t20011	scaffold_1:1988508-1989560	56.2738	5.93512	-3.24511	0.000750726	yes	139818	IPR007828:Protein of unknown function DUF706	sp|Q8L799|MIOX1_ARATH Inositol oxygenase 1 OS=Arabidopsis thaliana GN=MIOX1 PE=2 SV=1:263.462	1.13.99.1:Myo-inositol oxygenase.	KOG1573:Aldehyde reductase	inositol oxygenase activity:GO:0050113	01.05.02 sugar, glucoside, polyol and carboxylate metabolism	01.05.02.07 sugar, glucoside, polyol and carboxylate catabolism	30.01.09.11 polyphosphoinositol mediated signal transduction	34.11.03.13 osmosensing	42.02 eukaryotic plasma membrane	16.21.07 NAD/NADP binding
gm1.848_g	gm1.848_g	gm1.848_g	scaffold_1:3077505-3078778	15.6241	1.63874	-3.25312	0.00563564	yes	5292	IPR001176:1-aminocyclopropane-1-carboxylate synthase;;IPR015424:Pyridoxal phosphate-dependent transferase, major region;;IPR004839:Aminotransferase, class I and II;;IPR004838:Aminotransferases, class-I, pyridoxal-phosphate-binding site	sp|Q9X0Y2|AAT_THEMA Aspartate aminotransferase OS=Thermotoga maritima GN=aspC PE=1 SV=1:131.724	2.6.1.-:Transaminases (aminotransferases).	KOG0257:Kynurenine aminotransferase, glutamine transaminase K	acetyldiaminopimelate aminotransferase activity:GO:0043760;;6-aminohexanoate transaminase activity:GO:0018719;;aspartate-2-keto-4-methylthiobutyrate transaminase activity:GO:0046571;;N2-acetyl-L-lysine aminotransferase activity:GO:0043746;;1-aminocyclopropane-1-carboxylate synthase activity:GO:0016847;;pyridoxal phosphate binding:GO:0030170;;branched-chain amino acid:2-keto-4-methylthiobutyrate a…	01.01.03.05.01 biosynthesis of arginine
gm1.8819_g	gm1.8819_g	gm1.8819_g	scaffold_48:36055-36442	133.372	13.4193	-3.31307	0.00384279	yes	13263	IPR013055:Tachykinin/Neurokinin like, conserved site	-	-	-	-
estExt_Genewise1Plus.C_14_t10298	estExt_Genewise1Plus.C_14_t10298	estExt_Genewise1Plus.C_14_t10298	scaffold_14:372947-375737	59.3928	5.96013	-3.31687	9.58928e-05	yes	101105	IPR001382:Glycoside hydrolase, family 47	sp|Q8H116|MNS2_ARATH Mannosyl-oligosaccharide 1,2-alpha-mannosidase MNS2 OS=Arabidopsis thaliana GN=MNS2 PE=1 SV=1:241.891	3.2.1.113:Mannosyl-oligosaccharide 1,2-alpha-mannosidase.	KOG2204:Mannosyl-oligosaccharide alpha-1,2-mannosidase and related glycosyl hydrolases	calcium ion binding:GO:0005509;;membrane:GO:0016020;;mannosyl-oligosaccharide 1,2-alpha-mannosidase activity:GO:0004571	01.05 C-compound and carbohydrate metabolism	01.05.03 polysaccharide metabolism	14.07.02 modification with sugar residues (e.g. glycosylation, deglycosylation) N.crassa
estExt_Genewise1Plus.C_390082	estExt_Genewise1Plus.C_390082	estExt_Genewise1Plus.C_390082	scaffold_39:83896-88507	34.5771	3.38085	-3.35436	4.7257e-05	yes	104881	IPR003593:AAA+ ATPase, core;;IPR010929:CDR ABC transporter;;IPR013525:ABC-2 type transporter;;IPR003439:ABC transporter-like	sp|P41820|BFR1_SCHPO Brefeldin A resistance protein OS=Schizosaccharomyces pombe (strain ATCC 38366 / 972) GN=bfr1 PE=1 SV=1:1140.95	-	KOG0065:Pleiotropic drug resistance proteins (PDR1-15), ABC superfamily	nucleoside-triphosphatase activity:GO:0017111;;ATP binding:GO:0005524;;integral to membrane:GO:0016021;;transport:GO:0006810;;ATPase activity:GO:0016887;;ATPase activity, coupled to transmembrane movement of substances:GO:0042626;;nucleotide binding:GO:0000166	01.04 phosphate metabolism	01.05 C-compound and carbohydrate metabolism	20.01.01.01 cation transport (H+, Na+, K+, Ca2+ , NH4+, etc.) S.cerevisiae	20.01.03 C-compound and carbohydrate transport	20.01.13 lipid/fatty acid transport	20.01.27 drug/toxin transport	20.09.16.01 Type I protein secretion system (ABC-type transport systems) N.crassa	32.01.01 oxidative stress response	32.05.01.03 chemical agent resistance	32.07 detoxification	32.07.05 detoxification by export	34.01.01.01 homeostasis of metal ions (Na, K, Ca etc.) S.cerevisiae	16.19.03 ATP binding	20.03.22 transport ATPases	20.03.25 ABC transporters
estExt_fgenesh1_pm.C_180132	estExt_fgenesh1_pm.C_180132	estExt_fgenesh1_pm.C_180132	scaffold_18:484381-486336	50.6864	4.93059	-3.36177	0.000130782	yes	138416	IPR004843:Metallophosphoesterase;;IPR006179:5'-Nucleotidase and apyrase;;IPR008334:5'-Nucleotidase, C-terminal	sp|P21589|5NTD_HUMAN 5&apos;-nucleotidase OS=Homo sapiens GN=NT5E PE=1 SV=1:242.276	3.1.3.5:5'-nucleotidase.	KOG4419:5' nucleotidase	IMP-GMP specific 5'-nucleotidase activity:GO:0017175;;5'-nucleotidase activity:GO:0008253;;hydrolase activity:GO:0016787;;nucleotide catabolic process:GO:0009166	01.03.01 purin nucleotide/nucleoside/nucleobase metabolism N.crassa	01.03.04 pyrimidine nucleotide/nucleoside/nucleobase metabolism N.crassa
e_gw1.6.526.1	e_gw1.6.526.1	e_gw1.6.526.1	scaffold_6:338035-339013	51.1844	4.91464	-3.38055	0.000662469	yes	76606	IPR004136:2-nitropropane dioxygenase, NPD	sp|O06179|Y1533_MYCTU Putative monooxygenase Rv1533 OS=Mycobacterium tuberculosis GN=Rv1533 PE=3 SV=1:121.324	-	-	electron transport:GO:0006118;;oxidoreductase activity:GO:0016491	01.02 nitrogen, sulfur and selenium metabolism L.innocua	01.05 C-compound and carbohydrate metabolism	01.05.10.07 aliphatic hydrocarbon catabolism	01.06 lipid, fatty acid and isoprenoid metabolism N.crassa	20.01.15 electron transport	16.21.05 FAD/FMN binding
estExt_fgenesh1_pm.C_290060	estExt_fgenesh1_pm.C_290060	estExt_fgenesh1_pm.C_290060	scaffold_29:221452-222719	441.609	41.6077	-3.40785	1.83095e-05	yes	139147	IPR011009:Protein kinase-like	-	-	-	-
fgenesh1_pm.25_#_11	fgenesh1_pm.25_#_11	fgenesh1_pm.25_#_11	scaffold_25:32753-34793	3574.88	327.745	-3.44725	0.00727529	yes	133544	IPR005828:General substrate transporter;;IPR007114:Major facilitator superfamily;;IPR003663:Sugar transporter;;IPR016196:MFS general substrate transporter;;IPR005829:Sugar transporter, conserved site	sp|Q9XIH7|PLT1_ARATH Putative polyol transporter 1 OS=Arabidopsis thaliana GN=PLT1 PE=2 SV=1:179.104	5.3.1.4:L-arabinose isomerase.	KOG0254:Predicted transporter (major facilitator superfamily)	sugar:hydrogen symporter activity:GO:0005351;;L-arabinose isomerase activity:GO:0008733;;carbohydrate transport:GO:0008643;;transporter activity:GO:0005215;;integral to membrane:GO:0016021;;transport:GO:0006810;;membrane:GO:0016020	01.05 C-compound and carbohydrate metabolism	01.06 lipid, fatty acid and isoprenoid metabolism N.crassa	20.01.03 C-compound and carbohydrate transport	20.01.13 lipid/fatty acid transport	20.09.16 cellular export and secretion	20.09.18 cellular import	20.09.18.07 non-vesicular cellular import	20.03 transport facilities
e_gw1.38.59.1	e_gw1.38.59.1	e_gw1.38.59.1	scaffold_38:92448-93587	499.841	45.3539	-3.46217	1.34165e-05	yes	92240	IPR012269:Aquaporin;;IPR000425:Major intrinsic protein	sp|P43549|YFF4_YEAST Uncharacterized membrane protein YFL054C OS=Saccharomyces cerevisiae (strain ATCC 204508 / S288c) GN=YFL054C PE=1 SV=1:204.912	-	KOG0224:Aquaporin (major intrinsic protein family)	transporter activity:GO:0005215;;integral to membrane:GO:0016021;;transport:GO:0006810;;membrane:GO:0016020	20.01.03 C-compound and carbohydrate transport	20.01.11 amine / polyamine transport	20.09.18 cellular import	20.03 transport facilities	20.03.01 channel / pore class transport
e_gw1.14.447.1	e_gw1.14.447.1	e_gw1.14.447.1	scaffold_14:783175-789578	20.8841	1.89392	-3.46296	0.000153785	yes	83372	IPR008250:E1-E2 ATPase-associated region;;IPR001757:ATPase, P-type, K/Mg/Cd/Cu/Zn/Na/Ca/Na/H-transporter;;IPR005834:Haloacid dehalogenase-like hydrolase;;IPR004014:ATPase, P-type cation-transporter, N-terminal;;IPR006068:ATPase, P-type cation-transporter, C-terminal;;IPR006414:Potassium/sodium efflux P-type ATPase, fungal-type	sp|P22189|ATC3_SCHPO Calcium-transporting ATPase 3 OS=Schizosaccharomyces pombe (strain ATCC 38366 / 972) GN=cta3 PE=1 SV=1:875.544	3.6.3.8:Calcium-transporting ATPase.	KOG0202:Ca2+ transporting ATPase	cation transport:GO:0006812;;integral to membrane:GO:0016021;;ATPase activity, coupled to transmembrane movement of ions, phosphorylative mechanism:GO:0015662;;membrane:GO:0016020;;hydrolase activity, acting on acid anhydrides, catalyzing transmembrane movement of substances:GO:0016820;;calcium-transporting ATPase activity:GO:0005388;;ATP binding:GO:0005524;;metabolic process:GO:0008152;;catalyti…	20.01.01.01 cation transport (H+, Na+, K+, Ca2+ , NH4+, etc.) N.crassa	20.09 transport routes	32.01.04 pH stress response	34.01.01 homeostasis of cations	34.01.01.01 homeostasis of metal ions (Na, K, Ca etc.) N.crassa	20.03.22 transport ATPases
estExt_Genewise1Plus.C_4_t20104	estExt_Genewise1Plus.C_4_t20104	estExt_Genewise1Plus.C_4_t20104	scaffold_4:754618-756711	87.0126	7.43622	-3.54858	1.97236e-05	yes
e_gw1.23.192.1	e_gw1.23.192.1	e_gw1.23.192.1	scaffold_23:427165-428418	144.494	12.3328	-3.55044	2.98386e-05	yes	88510	IPR002345:Lipocalin;;IPR001395:Aldo/keto reductase	sp|Q09923|YAKC_SCHPO Aldo-keto reductase yakc [NADP+] OS=Schizosaccharomyces pombe (strain ATCC 38366 / 972) GN=yakc PE=1 SV=1:304.679	1.1.1.65:Pyridoxine 4-dehydrogenase.	KOG1575:Voltage-gated shaker-like K+ channel, subunit beta/KCNAB	pyridoxine 4-dehydrogenase activity:GO:0050236;;transporter activity:GO:0005215;;transport:GO:0006810;;binding:GO:0005488;;oxidoreductase activity:GO:0016491	01.05 C-compound and carbohydrate metabolism	01.05.02.07 sugar, glucoside, polyol and carboxylate catabolism B.subtilis	01.07.01 biosynthesis of vitamins, cofactors, and prosthetic groups N.crassa	01.07.03 catabolism of vitamins, cofactors, and prosthetic groups N.crassa	20.01.01.01 cation transport (H+, Na+, K+, Ca2+ , NH4+, etc.)	20.09.18 cellular import	34.01.01 homeostasis of cations	34.01.01.01 homeostasis of metal ions (Na, K, Ca etc.) N.crassa	16.19.03 ATP binding	16.21.07 NAD/NADP binding	18.02 regulation of protein activity	20.03.01 channel / pore class transport	20.03.01.01 ion channels	20.03.25 ABC transporters
e_gw1.15.85.1	e_gw1.15.85.1	e_gw1.15.85.1	scaffold_15:520909-522885	97.1423	8.11142	-3.58207	1.98375e-05	yes	84151	IPR001128:Cytochrome P450;;IPR002401:Cytochrome P450, E-class, group I	sp|P10615|CP52A_CANTR Cytochrome P450 52A1 OS=Candida tropicalis GN=CYP52A1 PE=1 SV=3:276.559	1.14.14.1:Unspecific monooxygenase.	KOG0157:Cytochrome P450 CYP4/CYP19/CYP26 subfamilies	electron transport:GO:0006118;;unspecific monooxygenase activity:GO:0050381;;heme binding:GO:0020037;;monooxygenase activity:GO:0004497;;iron ion binding:GO:0005506	01.06 lipid, fatty acid and isoprenoid metabolism N.crassa	01.20.05.03 metabolism of alkanes, alkenes, alkanals, alkanols N.crassa
estExt_Genemark1.C_270046	estExt_Genemark1.C_270046	estExt_Genemark1.C_270046	scaffold_27:175052-177159	84.9923	7.03137	-3.59545	1.77027e-05	yes	26554	IPR000209:Peptidase S8 and S53, subtilisin, kexin, sedolisin;;IPR009020:Proteinase inhibitor, propeptide;;IPR015366:Peptidase S53, propeptide	sp|Q70GH4|SED3_ASPFU Tripeptidyl-peptidase sed3 OS=Neosartorya fumigata (strain ATCC MYA-4609 / Af293 / CBS 101355 / FGSC A1100) GN=sed3 PE=1 SV=1:347.436	3.4.14.9:Tripeptidyl-peptidase I.	-	serine-type peptidase activity:GO:0008236;;proteolysis:GO:0006508;;tripeptidyl-peptidase I activity:GO:0019131;;subtilase activity:GO:0004289	01.06 lipid, fatty acid and isoprenoid metabolism	14.07.11 protein processing (proteolytic)	14.13 protein/peptide degradation	14.13.04 lysosomal and vacuolar protein degradation	42.25 vacuole or lysosome	16.01 protein binding
estExt_Genewise1Plus.C_19_t10255	estExt_Genewise1Plus.C_19_t10255	estExt_Genewise1Plus.C_19_t10255	scaffold_19:316765-317896	276.657	22.8386	-3.59856	8.31752e-06	yes	102402	IPR000425:Major intrinsic protein	sp|P47862|AQP3_RAT Aquaporin-3 OS=Rattus norvegicus GN=Aqp3 PE=2 SV=1:105.145	-	KOG0224:Aquaporin (major intrinsic protein family)	transporter activity:GO:0005215;;transport:GO:0006810;;membrane:GO:0016020
estExt_fgenesh2_kg.C_230016	estExt_fgenesh2_kg.C_230016	estExt_fgenesh2_kg.C_230016	scaffold_23:227169-227910	2439.74	200.738	-3.60334	1.83095e-05	yes
e_gw1.47.48.1	e_gw1.47.48.1	e_gw1.47.48.1	scaffold_47:54169-54868	69.9352	5.66197	-3.62664	0.000392255	yes	93138	IPR011051:Cupin, RmlC-type	-	-	-	-
gw1.25.201.1	gw1.25.201.1	gw1.25.201.1	scaffold_25:381018-382605	20.7146	1.67655	-3.62708	0.000505414	yes	56216	-	-	-	KOG1029:Endocytic adaptor protein intersectin	-
estExt_fgenesh1_pg.C_60145	estExt_fgenesh1_pg.C_60145	estExt_fgenesh1_pg.C_60145	scaffold_6:476173-478095	29.6616	2.39663	-3.62952	0.000168293	yes	140920	IPR007114:Major facilitator superfamily;;IPR011701:Major facilitator superfamily MFS-1;;IPR016196:MFS general substrate transporter	sp|P36035|JEN1_YEAST Carboxylic acid transporter protein homolog OS=Saccharomyces cerevisiae (strain ATCC 204508 / S288c) GN=JEN1 PE=1 SV=1:230.335	-	KOG0255:Synaptic vesicle transporter SVOP and related transporters (major facilitator superfamily)	transporter activity:GO:0005215;;integral to membrane:GO:0016021;;transport:GO:0006810	01.05 C-compound and carbohydrate metabolism	20.01.03 C-compound and carbohydrate transport	20.03 transport facilities
gm1.8551_g	gm1.8551_g	gm1.8551_g	scaffold_39:20464-22831	18.6093	1.49329	-3.63946	0.000582145	yes	12995	IPR008313:Uncharacterised conserved protein UCP028846;;IPR008928:Six-hairpin glycosidase-like	sp|Q10449|MU157_SCHPO Meiotically up-regulated gene 157 protein OS=Schizosaccharomyces pombe (strain ATCC 38366 / 972) GN=mug157 PE=1 SV=1:397.127	-	-	catalytic activity:GO:0003824
estExt_Genewise1Plus.C_8_t20171	estExt_Genewise1Plus.C_8_t20171	estExt_Genewise1Plus.C_8_t20171	scaffold_8:906509-907571	66.4576	5.31166	-3.6452	0.000186498	yes
fgenesh1_pg.4_#_233	fgenesh1_pg.4_#_233	fgenesh1_pg.4_#_233	scaffold_4:884997-886379	93.6143	7.46645	-3.64824	2.99917e-05	yes	33886	IPR017853:Glycoside hydrolase, catalytic core;;IPR001223:Glycoside hydrolase, family 18, catalytic domain;;IPR001579:Glycoside hydrolase, chitinase active site;;IPR011583:Chitinase II	sp|Q1E3R8|CHI1_COCIM Endochitinase 1 OS=Coccidioides immitis (strain RS) GN=CTS1 PE=3 SV=1:194.897	3.2.1.14:Chitinase.	KOG2806:Chitinase	endochitinase activity:GO:0008843;;hydrolase activity, hydrolyzing O-glycosyl compounds:GO:0004553;;carbohydrate metabolic process:GO:0005975;;chitin catabolic process:GO:0006032;;chitinase activity:GO:0004568
estExt_Genewise1.C_16_t10169	estExt_Genewise1.C_16_t10169	estExt_Genewise1.C_16_t10169	scaffold_16:213632-214517	225.79	17.9385	-3.65386	1.89265e-05	yes	113236	-	-	-	KOG2806:Chitinase	-
e_gw1.15.20.1	e_gw1.15.20.1	e_gw1.15.20.1	scaffold_15:706822-707563	82.7683	6.47043	-3.67715	0.000299949	yes
estExt_fgenesh2_kg.C_20308	estExt_fgenesh2_kg.C_20308	estExt_fgenesh2_kg.C_20308	scaffold_2:1842909-1843744	94.4504	7.38236	-3.6774	8.17805e-05	yes	122177	-	-	-	KOG4443:Putative transcription factor HALR/MLL3, involved in embryonic development	-
estExt_Genemark1.C_100013	estExt_Genemark1.C_100013	estExt_Genemark1.C_100013	scaffold_10:38894-42171	82.1342	6.39401	-3.68319	5.97321e-06	yes	25095	IPR001764:Glycoside hydrolase, family 3, N-terminal;;IPR002772:Glycoside hydrolase, family 3, C-terminal;;IPR017853:Glycoside hydrolase, catalytic core	sp|Q0CTD7|BGLA_ASPTN Probable beta-glucosidase A OS=Aspergillus terreus (strain NIH 2624 / FGSC A1156) GN=bglA PE=3 SV=1:996.112	3.2.1.21:Beta-glucosidase.	-	hydrolase activity, hydrolyzing O-glycosyl compounds:GO:0004553;;carbohydrate metabolic process:GO:0005975;;beta-glucosidase activity:GO:0008422	01.05.02.07 sugar, glucoside, polyol and carboxylate catabolism N.crassa	01.05.03 polysaccharide metabolism
estExt_Genewise1.C_13_t10204	estExt_Genewise1.C_13_t10204	estExt_Genewise1.C_13_t10204	scaffold_13:238840-242743	412.797	31.9158	-3.69309	3.53993e-05	yes	112350	IPR008973:C2 calcium/lipid-binding region, CaLB;;IPR000008:C2 calcium-dependent membrane targeting;;IPR006035:Ureohydrolase	sp|Q9USG8|MU190_SCHPO Meiotically up-regulated gene 190 protein OS=Schizosaccharomyces pombe (strain ATCC 38366 / 972) GN=mug190 PE=1 SV=1:443.351	-	KOG1012:Ca2+-dependent lipid-binding protein CLB1/vesicle protein vp115/Granuphilin A, contains C2 domain	metal ion binding:GO:0046872;;hydrolase activity, acting on carbon-nitrogen (but not peptide) bonds, in linear amidines:GO:0016813
estExt_Genewise1Plus.C_5_t10370	estExt_Genewise1Plus.C_5_t10370	estExt_Genewise1Plus.C_5_t10370	scaffold_5:456168-458522	374.624	28.8928	-3.69666	5.8811e-06	yes	97355	IPR002110:Ankyrin	sp|Q99NH0|ANR17_MOUSE Ankyrin repeat domain-containing protein 17 OS=Mus musculus GN=Ankrd17 PE=1 SV=2:106.686;;sp|Q99NH0|ANR17_MOUSE Ankyrin repeat domain-containing protein 17 OS=Mus musculus GN=Ankrd17 PE=1 SV=2:140.969;;sp|Q99NH0|ANR17_MOUSE Ankyrin repeat domain-containing protein 17 OS=Mus musculus GN=Ankrd17 PE=1 SV=2:60.8474;;sp|Q99NH0|ANR17_MOUSE Ankyrin repeat domain-containing protein …	-	KOG4177:Ankyrin	-
fgenesh1_pg.18_#_49	fgenesh1_pg.18_#_49	fgenesh1_pg.18_#_49	scaffold_18:165339-166322	40.6529	3.10606	-3.7102	0.000498626	yes
fgenesh1_pg.1_#_696	fgenesh1_pg.1_#_696	fgenesh1_pg.1_#_696	scaffold_1:2693182-2694525	153.41	11.7056	-3.71212	7.22196e-06	yes	32207	IPR006026:Peptidase, metallopeptidases;;IPR006025:Peptidase M, neutral zinc metallopeptidases, zinc-binding site;;IPR001818:Peptidase M10A and M12B, matrixin and adamalysin	-	-	-	metallopeptidase activity:GO:0008237;;zinc ion binding:GO:0008270;;proteinaceous extracellular matrix:GO:0005578;;proteolysis:GO:0006508;;metalloendopeptidase activity:GO:0004222
estExt_fgenesh1_pg.C_260010	estExt_fgenesh1_pg.C_260010	estExt_fgenesh1_pg.C_260010	scaffold_26:22559-24643	77.2223	5.86838	-3.71798	1.09186e-05	yes	142825	IPR000209:Peptidase S8 and S53, subtilisin, kexin, sedolisin;;IPR009020:Proteinase inhibitor, propeptide;;IPR015366:Peptidase S53, propeptide	sp|Q70J59|SED2_ASPFU Tripeptidyl-peptidase sed2 OS=Neosartorya fumigata (strain ATCC MYA-4609 / Af293 / CBS 101355 / FGSC A1100) GN=sed2 PE=1 SV=1:408.297	3.4.14.9:Tripeptidyl-peptidase I.	-	serine-type peptidase activity:GO:0008236;;proteolysis:GO:0006508;;tripeptidyl-peptidase I activity:GO:0019131;;subtilase activity:GO:0004289	01.06 lipid, fatty acid and isoprenoid metabolism	14.07.11 protein processing (proteolytic)	14.13 protein/peptide degradation	14.13.04 lysosomal and vacuolar protein degradation	42.25 vacuole or lysosome	16.01 protein binding
fgenesh1_pm.22_#_65	fgenesh1_pm.22_#_65	fgenesh1_pm.22_#_65	scaffold_22:210758-211685	57.4791	4.36244	-3.71983	0.000268563	yes
e_gw1.1.2325.1	e_gw1.1.2325.1	e_gw1.1.2325.1	scaffold_1:2750746-2752665	27.6224	2.07282	-3.73617	0.000130782	yes	70100	IPR005198:Glycoside hydrolase, family 76;;IPR008928:Six-hairpin glycosidase-like	sp|P36091|DCW1_YEAST Mannan endo-1,6-alpha-mannosidase DCW1 OS=Saccharomyces cerevisiae (strain ATCC 204508 / S288c) GN=DCW1 PE=1 SV=1:55.4546	-	-	catalytic activity:GO:0003824
gm1.8320_g	gm1.8320_g	gm1.8320_g	scaffold_34:47734-49380	17.933	1.32964	-3.75351	0.0004396	yes	12764	IPR010061:Methylmalonate-semialdehyde dehydrogenase;;IPR016161:Aldehyde/histidinol dehydrogenase;;IPR016160:Aldehyde dehydrogenase, conserved site;;IPR015590:Aldehyde dehydrogenase	sp|Q9EQ20|MMSA_MOUSE Methylmalonate-semialdehyde dehydrogenase [acylating], mitochondrial OS=Mus musculus GN=Aldh6a1 PE=1 SV=1:598.971	1.2.1.27:Methylmalonate-semialdehyde dehydrogenase (acylating).	KOG2449:Methylmalonate semialdehyde dehydrogenase	metabolic process:GO:0008152;;methylmalonate-semialdehyde dehydrogenase (acylating) activity:GO:0004491;;oxidoreductase activity:GO:0016491;;valine metabolic process:GO:0006573	01.01 amino acid metabolism	01.01.11 metabolism of the pyruvate family (alanine, isoleucine, leucine, valine) and D-alanine B.subtilis	01.05 C-compound and carbohydrate metabolism	20.01.15 electron transport	16.21.07 NAD/NADP binding
estExt_Genewise1Plus.C_350047	estExt_Genewise1Plus.C_350047	estExt_Genewise1Plus.C_350047	scaffold_35:63324-65438	13.6107	0.989183	-3.78236	0.000658347	yes	104585	IPR007114:Major facilitator superfamily;;IPR011701:Major facilitator superfamily MFS-1;;IPR016196:MFS general substrate transporter	sp|O94491|YC7A_SCHPO Uncharacterized transporter C417.10 OS=Schizosaccharomyces pombe (strain ATCC 38366 / 972) GN=SPCC417.10 PE=2 SV=1:407.912	-	KOG2533:Permease of the major facilitator superfamily	transporter activity:GO:0005215;;integral to membrane:GO:0016021;;transport:GO:0006810	20.01.01 ion transport	20.01.23 allantoin and allantoate transport	20.01.25 vitamine/cofactor transport	20.09.18 cellular import	20.09.18.07 non-vesicular cellular import	20.03 transport facilities
estExt_Genewise1.C_15_t10236	estExt_Genewise1.C_15_t10236	estExt_Genewise1.C_15_t10236	scaffold_15:331253-332446	700.856	50.9168	-3.7829	2.37843e-06	yes	113012	IPR001424:Superoxide dismutase, copper/zinc binding	sp|Q96VL0|SODC_CLAPU Superoxide dismutase [Cu-Zn] OS=Claviceps purpurea GN=SOD1 PE=3 SV=3:270.781	1.15.1.1:Superoxide dismutase.	KOG0441:Cu2+/Zn2+ superoxide dismutase SOD1	metal ion binding:GO:0046872;;superoxide metabolic process:GO:0006801;;superoxide dismutase activity:GO:0004784	30.01.05.01.03 MAPKKK cascade	32.01.01 oxidative stress response	32.07.07 oxygen and radical detoxification	32.07.07.07 superoxide metabolism	34.01.01.01 homeostasis of metal ions (Na, K, Ca etc.) S.cerevisiae	40.10.02.02.03 disassembly of cell structures	16.17 metal binding	16.17.09 heavy metal binding (Cu, Fe, Zn)	18.02.01.01.05 kinase activator
estExt_Genewise1Plus.C_270329	estExt_Genewise1Plus.C_270329	estExt_Genewise1Plus.C_270329	scaffold_27:370199-370968	104.775	7.5493	-3.7948	7.91507e-05	yes	103865	IPR016181:Acyl-CoA N-acyltransferase;;IPR000182:GCN5-related N-acetyltransferase	-	-	-	metabolic process:GO:0008152;;N-acetyltransferase activity:GO:0008080
fgenesh1_pm.32_#_16	fgenesh1_pm.32_#_16	fgenesh1_pm.32_#_16	scaffold_32:42743-44766	20.5258	1.4775	-3.7962	0.000228052	yes	134387	IPR016137:Regulator of G protein signalling superfamily	-	-	-	-
e_gw1.4.911.1	e_gw1.4.911.1	e_gw1.4.911.1	scaffold_4:935552-936095	23.9538	1.68736	-3.82741	0.00621765	yes
gm1.4129_g	gm1.4129_g	gm1.4129_g	scaffold_8:967529-969925	127.345	8.92128	-3.83534	2.35527e-06	yes	8573	IPR002018:Carboxylesterase, type B	sp|P32948|LIP4_CANRU Lipase 4 OS=Candida rugosa GN=LIP4 PE=3 SV=1:398.282	3.1.1.1:Carboxylesterase.	KOG4389:Acetylcholinesterase/Butyrylcholinesterase	carboxylesterase activity:GO:0004091	01.06 lipid, fatty acid and isoprenoid metabolism N.crassa
estExt_Genewise1.C_13_t20034	estExt_Genewise1.C_13_t20034	estExt_Genewise1.C_13_t20034	scaffold_13:684503-685529	47.0956	3.27376	-3.84657	0.000156844	yes	112529	IPR016040:NAD(P)-binding;;IPR002347:Glucose/ribitol dehydrogenase;;IPR002198:Short-chain dehydrogenase/reductase SDR	sp|Q49117|Y182_METEA Uncharacterized oxidoreductase MexAM1_META1p0182 OS=Methylobacterium extorquens (strain ATCC 14718 / DSM 1338 / AM1) GN=MexAM1_META1p0182 PE=3 SV=2:119.398	1.1.1.100:3-oxoacyl-[acyl-carrier protein] reductase.	KOG0725:Reductases with broad range of substrate specificities	metabolic process:GO:0008152;;3-oxoacyl-[acyl-carrier-protein] reductase activity:GO:0004316;;catalytic activity:GO:0003824;;binding:GO:0005488;;oxidoreductase activity:GO:0016491	01.05 C-compound and carbohydrate metabolism	01.05.08.07 C-4 compound catabolism	01.06 lipid, fatty acid and isoprenoid metabolism N.crassa	01.06.05 fatty acid metabolism	01.07 metabolism of vitamins, cofactors, and prosthetic groups	01.20.15 metabolism of derivatives of dehydroquinic acid, shikimic acid and chorismic acid B.subtilis	01.20.35.01.01 metabolism of melanins	02.07 pentose-phosphate pathway	20.01.15 electron transport	16.21.07 NAD/NADP binding
e_gw1.20.152.1	e_gw1.20.152.1	e_gw1.20.152.1	scaffold_20:305632-306598	21.7444	1.4997	-3.8579	0.000988938	yes	87294	IPR006314:Dyp-type peroxidase	sp|P76536|YFEX_ECOLI Uncharacterized protein yfeX OS=Escherichia coli (strain K12) GN=yfeX PE=3 SV=2:140.969	-	-	-
e_gw1.9.807.1	e_gw1.9.807.1	e_gw1.9.807.1	scaffold_9:817176-818208	132.018	9.02526	-3.87063	9.89827e-06	yes	80332	IPR001279:Beta-lactamase-like	sp|Q8VPD5|AHLLM_RHIRD N-acyl homoserine lactonase AttM OS=Rhizobium radiobacter GN=attM PE=1 SV=1:59.6918	-	-	hydrolase activity:GO:0016787
e_gw1.54.13.1	e_gw1.54.13.1	e_gw1.54.13.1	scaffold_54:14697-17784	16.2094	1.10666	-3.87255	7.24183e-05	yes	93487	IPR017853:Glycoside hydrolase, catalytic core;;IPR006102:Glycoside hydrolase family 2, immunoglobulin-like beta-sandwich;;IPR008979:Galactose-binding like	sp|A2QWU9|MANBA_ASPNC Probable beta-mannosidase A OS=Aspergillus niger (strain CBS 513.88 / FGSC A1513) GN=mndA PE=3 SV=1:951.814	3.2.1.25:Beta-mannosidase.	KOG2230:Predicted beta-mannosidase	hydrolase activity, hydrolyzing O-glycosyl compounds:GO:0004553;;carbohydrate metabolic process:GO:0005975;;beta-mannosidase activity:GO:0004567
estExt_fgenesh2_kg.C_190016	estExt_fgenesh2_kg.C_190016	estExt_fgenesh2_kg.C_190016	scaffold_19:86836-87527	44.3652	3.02174	-3.87598	0.000528481	yes
e_gw1.5.916.1	e_gw1.5.916.1	e_gw1.5.916.1	scaffold_5:182511-183022	156.543	10.3018	-3.92559	0.000412406	yes
e_gw1.18.61.1	e_gw1.18.61.1	e_gw1.18.61.1	scaffold_18:489486-491210	75.8269	4.8914	-3.95439	7.22196e-06	yes	85923	IPR001128:Cytochrome P450;;IPR002401:Cytochrome P450, E-class, group I	sp|P93846|CP51_SORBI Obtusifoliol 14-alpha demethylase OS=Sorghum bicolor GN=CYP51 PE=1 SV=1:93.9745	-	KOG0684:Cytochrome P450	electron transport:GO:0006118;;sterol 14-demethylase activity:GO:0008398;;heme binding:GO:0020037;;monooxygenase activity:GO:0004497;;iron ion binding:GO:0005506
e_gw1.27.194.1	e_gw1.27.194.1	e_gw1.27.194.1	scaffold_27:22649-24176	65.1849	4.15987	-3.96993	7.64503e-06	yes	89683	IPR013891:Protein of unknown function DUF1766	-	-	-	-
e_gw1.29.72.1	e_gw1.29.72.1	e_gw1.29.72.1	scaffold_29:128892-129851	21.2558	1.35439	-3.97215	0.0017532	yes	90483	IPR016181:Acyl-CoA N-acyltransferase;;IPR000182:GCN5-related N-acetyltransferase	-	-	-	metabolic process:GO:0008152;;N-acetyltransferase activity:GO:0008080
gw1.3.1434.1	gw1.3.1434.1	gw1.3.1434.1	scaffold_3:824341-825046	12.6344	0.797776	-3.98523	0.00249957	yes	63472	IPR010730:Heterokaryon incompatibility	sp|Q00808|HETE1_PODAN Vegetative incompatibility protein HET-E-1 OS=Podospora anserina GN=HET-E1 PE=4 SV=1:203.371	-	-	-
e_gw1.8.229.1	e_gw1.8.229.1	e_gw1.8.229.1	scaffold_8:1081645-1082775	619.77	36.9209	-4.06922	4.07126e-07	yes	79514	IPR007087:Zinc finger, C2H2-type;;IPR015880:Zinc finger, C2H2-like	sp|P10069|BRLA_EMENI Regulatory protein brlA OS=Emericella nidulans GN=brlA PE=4 SV=1:59.3066	-	KOG1721:FOG: Zn-finger	nucleic acid binding:GO:0003676;;zinc ion binding:GO:0008270;;intracellular:GO:0005622	11.02.03.04 transcriptional control
fgenesh2_kg.7_#_109_#_gi|30121351|gb|CB906693.1|CB906693	fgenesh2_kg.7_#_109_#_gi|30121351|gb|CB906693.1|CB906693	fgenesh2_kg.7_#_109_#_gi|30121351|gb|CB906693.1|CB906693	scaffold_7:922099-922449	163.582	9.31409	-4.13446	0.000499256	yes
fgenesh1_pg.1_#_247	fgenesh1_pg.1_#_247	fgenesh1_pg.1_#_247	scaffold_1:959927-960848	53.761	3.02769	-4.15027	3.43519e-05	yes
estExt_fgenesh2_kg.C_70088	estExt_fgenesh2_kg.C_70088	estExt_fgenesh2_kg.C_70088	scaffold_7:758701-759442	140.637	7.86343	-4.16067	5.55241e-06	yes
e_gw1.22.381.1	e_gw1.22.381.1	e_gw1.22.381.1	scaffold_22:379854-382533	19.9268	1.11068	-4.1652	1.30878e-05	yes	87764	IPR008009:Putative Ig;;IPR006644:Dystroglycan-type cadherin-like;;IPR015919:Cadherin-like	sp|P38928|AXL2_YEAST Protein AXL2 OS=Saccharomyces cerevisiae (strain ATCC 204508 / S288c) GN=AXL2 PE=1 SV=1:160.614	-	-	calcium ion binding:GO:0005509;;protein binding:GO:0005515;;membrane:GO:0016020
estExt_Genewise1Plus.C_290266	estExt_Genewise1Plus.C_290266	estExt_Genewise1Plus.C_290266	scaffold_29:366614-368392	162.166	8.92087	-4.18414	2.83439e-07	yes	104193	IPR016137:Regulator of G protein signalling superfamily	-	-	-	-
gw1.2.733.1	gw1.2.733.1	gw1.2.733.1	scaffold_2:158110-158668	21.9761	1.20038	-4.19437	0.0011274	yes
fgenesh2_kg.16_#_3_#_gi|38129840|gb|CF875158.1|CF875158	fgenesh2_kg.16_#_3_#_gi|38129840|gb|CF875158.1|CF875158	fgenesh2_kg.16_#_3_#_gi|38129840|gb|CF875158.1|CF875158	scaffold_16:31069-34076	187.489	10.1226	-4.21115	1.13977e-05	yes
e_gw1.3.1501.1	e_gw1.3.1501.1	e_gw1.3.1501.1	scaffold_3:1748250-1748955	23.8558	1.27284	-4.22821	0.00148854	yes
estExt_Genewise1Plus.C_4_t20221	estExt_Genewise1Plus.C_4_t20221	estExt_Genewise1Plus.C_4_t20221	scaffold_4:879656-881158	18.8883	1.007	-4.22936	0.000168293	yes
fgenesh1_pm.10_#_248	fgenesh1_pm.10_#_248	fgenesh1_pm.10_#_248	scaffold_10:875451-876635	159.809	8.41467	-4.2473	5.84861e-07	yes
fgenesh1_pm.4_#_160	fgenesh1_pm.4_#_160	fgenesh1_pm.4_#_160	scaffold_4:532293-533437	44.3974	2.31106	-4.26385	9.22841e-05	yes	128163	-	-	-	KOG1216:von Willebrand factor and related coagulation proteins	-
estExt_fgenesh1_pg.C_230055	estExt_fgenesh1_pg.C_230055	estExt_fgenesh1_pg.C_230055	scaffold_23:277112-279428	15.3823	0.767132	-4.32565	3.76793e-05	yes	142712	IPR016137:Regulator of G protein signalling superfamily	-	-	-	-
estExt_Genewise1.C_6_t20284	estExt_Genewise1.C_6_t20284	estExt_Genewise1.C_6_t20284	scaffold_6:869248-872363	107.295	5.31876	-4.33434	9.54399e-08	yes	109567	IPR001764:Glycoside hydrolase, family 3, N-terminal;;IPR002772:Glycoside hydrolase, family 3, C-terminal;;IPR017853:Glycoside hydrolase, catalytic core	sp|Q4WMU3|BGLF_ASPFU Probable beta-glucosidase F OS=Neosartorya fumigata (strain ATCC MYA-4609 / Af293 / CBS 101355 / FGSC A1100) GN=bglF PE=3 SV=2:1031.17	3.2.1.21:Beta-glucosidase.	-	hydrolase activity, hydrolyzing O-glycosyl compounds:GO:0004553;;carbohydrate metabolic process:GO:0005975;;beta-glucosidase activity:GO:0008422	01.05.02.07 sugar, glucoside, polyol and carboxylate catabolism N.crassa	01.05.03 polysaccharide metabolism
e_gw1.1.458.1	e_gw1.1.458.1	e_gw1.1.458.1	scaffold_1:3592579-3593908	82.955	4.05803	-4.35348	8.98196e-07	yes	67561	IPR000834:Peptidase M14, carboxypeptidase A	sp|P18143|CBPS_STRGR Zinc carboxypeptidase OS=Streptomyces griseus GN=scpD PE=1 SV=2:92.0485	3.4.17.-:Metallocarboxypeptidases.	KOG2650:Zinc carboxypeptidase	zinc ion binding:GO:0008270;;carboxypeptidase A activity:GO:0004182;;proteolysis:GO:0006508
e_gw1.1.1399.1	e_gw1.1.1399.1	e_gw1.1.1399.1	scaffold_1:2310886-2314330	581.515	27.5648	-4.39892	8.42507e-07	yes	70020	IPR003097:FAD-binding, type 1;;IPR001433:Oxidoreductase FAD/NAD(P)-binding;;IPR001128:Cytochrome P450;;IPR001709:Flavoprotein pyridine nucleotide cytochrome reductase;;IPR008254:Flavodoxin/nitric oxide synthase;;IPR001094:Flavodoxin-like;;IPR001680:WD40 repeat;;IPR002401:Cytochrome P450, E-class, group I	sp|Q9Y8G7|C505_FUSOX Bifunctional P-450:NADPH-P450 reductase OS=Fusarium oxysporum GN=CYP505 PE=1 SV=1:920.998	1.6.2.4:NADPH--ferrihemoprotein reductase.	KOG1158:NADP/FAD dependent oxidoreductase	NADPH-hemoprotein reductase activity:GO:0003958;;electron transport:GO:0006118;;electron carrier activity:GO:0009055;;oxidoreductase activity:GO:0016491;;heme binding:GO:0020037;;monooxygenase activity:GO:0004497;;FMN binding:GO:0010181;;iron ion binding:GO:0005506	01.05 C-compound and carbohydrate metabolism	02.25 oxidation of fatty acids
estExt_fgenesh2_kg.C_410010	estExt_fgenesh2_kg.C_410010	estExt_fgenesh2_kg.C_410010	scaffold_41:41159-42459	30.817	1.42888	-4.43077	0.000665557	yes	125427	-	sp|P22222|E13B_CELCE Glucan endo-1,3-beta-glucosidase OS=Cellulosimicrobium cellulans PE=1 SV=1:74.3294	-	-	-
estExt_Genemark1.C_100031	estExt_Genemark1.C_100031	estExt_Genemark1.C_100031	scaffold_10:95265-100101	247.371	11.3993	-4.43966	5.76597e-08	yes	25104	IPR011050:Pectin lyase fold/virulence factor	sp|P49426|EXG1_COCCA Glucan 1,3-beta-glucosidase OS=Cochliobolus carbonum GN=EXG1 PE=1 SV=1:548.51	-	-	-	01.05.03 polysaccharide metabolism	01.25.01 extracellular polysaccharide degradation N.crassa	32.05.05 virulence, disease factors	32.10.07 degradation / modification of foreign (exogenous) polysaccharides N.crassa	42.27 extracellular / secretion proteins
e_gw1.1.1853.1	e_gw1.1.1853.1	e_gw1.1.1853.1	scaffold_1:2713418-2714511	155.332	7.10228	-4.45093	8.19443e-07	yes
estExt_Genemark1.C_280018	estExt_Genemark1.C_280018	estExt_Genemark1.C_280018	scaffold_28:68983-69550	990.286	44.3223	-4.48174	4.07126e-07	yes
fgenesh1_pm.5_#_329	fgenesh1_pm.5_#_329	fgenesh1_pm.5_#_329	scaffold_5:1190078-1191292	27.6918	1.22178	-4.5024	3.92556e-05	yes	128791	IPR013094:Alpha/beta hydrolase fold-3	sp|Q5UQ83|YR526_MIMIV Putative alpha/beta hydrolase R526 OS=Acanthamoeba polyphaga mimivirus GN=MIMI_R526 PE=1 SV=1:56.6102	-	-	metabolic process:GO:0008152;;hydrolase activity:GO:0016787	01.06 lipid, fatty acid and isoprenoid metabolism N.crassa
gm1.3745_g	gm1.3745_g	gm1.3745_g	scaffold_7:983647-984446	253.307	10.8824	-4.54082	2.347e-07	yes
gm1.8581_g	gm1.8581_g	gm1.8581_g	scaffold_39:129989-130831	12.2981	0.528234	-4.54111	0.00288118	yes	13025	IPR009939:Fungal chitosanase	-	-	-	-	01.05.03 polysaccharide metabolism
fgenesh1_pm.4_#_91	fgenesh1_pm.4_#_91	fgenesh1_pm.4_#_91	scaffold_4:285578-290519	17.9983	0.75732	-4.57081	3.49757e-07	yes	128094	IPR003609:Apple-like;;IPR003014:N/apple PAN;;IPR001189:Manganese and iron superoxide dismutase	-	3.2.1.3:Glucan 1,4-alpha-glucosidase.	KOG4701:Chitinase	glucan 1,4-alpha-glucosidase activity:GO:0004339;;metal ion binding:GO:0046872;;superoxide metabolic process:GO:0006801;;superoxide dismutase activity:GO:0004784
fgenesh1_pm.13_#_78	fgenesh1_pm.13_#_78	fgenesh1_pm.13_#_78	scaffold_13:267176-269672	151.322	6.34221	-4.57649	1.81269e-08	yes	131271	IPR003593:AAA+ ATPase, core;;IPR003959:AAA ATPase, core;;IPR016084:Haem oxygenase-like, multi-helical	sp|Q5T9A4|ATD3B_HUMAN ATPase family AAA domain-containing protein 3B OS=Homo sapiens GN=ATAD3B PE=1 SV=1:74.7146	-	KOG0742:AAA+-type ATPase	ATP binding:GO:0005524;;nucleoside-triphosphatase activity:GO:0017111;;nucleotide binding:GO:0000166
estExt_Genewise1Plus.C_2_t10435	estExt_Genewise1Plus.C_2_t10435	estExt_Genewise1Plus.C_2_t10435	scaffold_2:514415-516584	110.949	4.4539	-4.63869	2.30078e-08	yes	95281	IPR007114:Major facilitator superfamily;;IPR011701:Major facilitator superfamily MFS-1;;IPR016196:MFS general substrate transporter	sp|Q00357|TOXA_COCCA Putative HC-toxin efflux carrier TOXA OS=Cochliobolus carbonum GN=TOXA PE=3 SV=1:300.056	-	KOG0254:Predicted transporter (major facilitator superfamily)	transporter activity:GO:0005215;;integral to membrane:GO:0016021;;transport:GO:0006810	20.01.27 drug/toxin transport	20.09.16 cellular export and secretion	20.09.16.01 Type I protein secretion system (ABC-type transport systems) N.crassa	32.05.01 resistance proteins	32.07.05 detoxification by export	20.03.25 ABC transporters
fgenesh1_pm.5_#_272	fgenesh1_pm.5_#_272	fgenesh1_pm.5_#_272	scaffold_5:930462-931530	65.0712	2.57763	-4.6579	1.76263e-06	yes	128734	IPR007272:Protein of unknown function DUF395, YeeE/YedE	-	-	-	-
gm1.6630_g	gm1.6630_g	gm1.6630_g	scaffold_19:442059-442677	115.689	4.54167	-4.67089	7.03557e-06	yes
e_gw1.28.98.1	e_gw1.28.98.1	e_gw1.28.98.1	scaffold_28:215790-217281	18.741	0.723457	-4.69514	7.24183e-05	yes	90399	-	-	-	KOG1187:Serine/threonine protein kinase	-
estExt_fgenesh2_kg.C_210002	estExt_fgenesh2_kg.C_210002	estExt_fgenesh2_kg.C_210002	scaffold_21:33761-35454	129.747	4.84132	-4.74416	1.99426e-08	yes	124526	IPR015821:Glycoside hydrolase, family 18, N-terminal;;IPR017853:Glycoside hydrolase, catalytic core;;IPR001223:Glycoside hydrolase, family 18, catalytic domain;;IPR001579:Glycoside hydrolase, chitinase active site;;IPR011583:Chitinase II	sp|P48827|CHI4_TRIHA 42 kDa endochitinase OS=Trichoderma harzianum GN=chit42 PE=1 SV=1:707.597	3.2.1.14:Chitinase.	KOG2806:Chitinase	endochitinase activity:GO:0008843;;hydrolase activity, hydrolyzing O-glycosyl compounds:GO:0004553;;carbohydrate metabolic process:GO:0005975;;chitin catabolic process:GO:0006032;;chitinase activity:GO:0004568	01.05.03 polysaccharide metabolism	01.05.09.07 aminosaccharide catabolism
fgenesh1_pm.11_#_44	fgenesh1_pm.11_#_44	fgenesh1_pm.11_#_44	scaffold_11:151967-152582	65.5249	2.42496	-4.75601	0.000108251	yes
estExt_Genewise1Plus.C_2_t30014	estExt_Genewise1Plus.C_2_t30014	estExt_Genewise1Plus.C_2_t30014	scaffold_2:1285639-1288913	202.008	7.44259	-4.76246	1.20867e-08	yes	95552	IPR016181:Acyl-CoA N-acyltransferase;;IPR000182:GCN5-related N-acetyltransferase	sp|O59806|YJV8_SCHPO Uncharacterized N-acetyltransferase C550.08 OS=Schizosaccharomyces pombe (strain ATCC 38366 / 972) GN=SPCC550.08 PE=2 SV=1:162.155	-	-	metabolic process:GO:0008152;;N-acetyltransferase activity:GO:0008080
e_gw1.4.1160.1	e_gw1.4.1160.1	e_gw1.4.1160.1	scaffold_4:952917-957177	82.1649	3.00738	-4.77194	5.39334e-09	yes	73914	IPR003593:AAA+ ATPase, core;;IPR010929:CDR ABC transporter;;IPR013525:ABC-2 type transporter;;IPR003439:ABC transporter-like	sp|P53756|PDR18_YEAST ABC transporter ATP-binding protein/permease PDR18 OS=Saccharomyces cerevisiae (strain ATCC 204508 / S288c) GN=PDR18 PE=2 SV=1:987.252	-	KOG0065:Pleiotropic drug resistance proteins (PDR1-15), ABC superfamily	nucleoside-triphosphatase activity:GO:0017111;;ATP binding:GO:0005524;;integral to membrane:GO:0016021;;transport:GO:0006810;;ATPase activity:GO:0016887;;ATPase activity, coupled to transmembrane movement of substances:GO:0042626;;nucleotide binding:GO:0000166	01.04 phosphate metabolism	01.05 C-compound and carbohydrate metabolism	20.01.01.01 cation transport (H+, Na+, K+, Ca2+ , NH4+, etc.) S.cerevisiae	20.01.03 C-compound and carbohydrate transport	20.01.13 lipid/fatty acid transport	20.01.27 drug/toxin transport	20.09.16.01 Type I protein secretion system (ABC-type transport systems) N.crassa	32.01.01 oxidative stress response	32.05.01.03 chemical agent resistance	32.07 detoxification	32.07.05 detoxification by export	34.01.01.01 homeostasis of metal ions (Na, K, Ca etc.) S.cerevisiae	16.19.03 ATP binding	20.03.22 transport ATPases	20.03.25 ABC transporters
fgenesh1_pm.19_#_146	fgenesh1_pm.19_#_146	fgenesh1_pm.19_#_146	scaffold_19:485519-486448	12.1748	0.433807	-4.8107	0.00121008	yes
estExt_fgenesh1_pg.C_250006	estExt_fgenesh1_pg.C_250006	estExt_fgenesh1_pg.C_250006	scaffold_25:20201-20978	106.437	3.65419	-4.8643	4.07126e-07	yes
estExt_fgenesh2_kg.C_190009	estExt_fgenesh2_kg.C_190009	estExt_fgenesh2_kg.C_190009	scaffold_19:67238-68324	71.9395	2.46513	-4.86705	1.27249e-06	yes
fgenesh1_pg.14_#_132	fgenesh1_pg.14_#_132	fgenesh1_pg.14_#_132	scaffold_14:547608-548073	85.8023	2.93788	-4.86817	6.33479e-05	yes
estExt_fgenesh1_pm.C_400037	estExt_fgenesh1_pm.C_400037	estExt_fgenesh1_pm.C_400037	scaffold_40:106843-109333	205.031	6.58443	-4.96064	1.54854e-09	yes	139450	IPR002293:Amino acid/polyamine transporter I;;IPR004841:Amino acid permease-associated region	sp|P53388|DIP5_YEAST Dicarboxylic amino acid permease OS=Saccharomyces cerevisiae (strain ATCC 204508 / S288c) GN=DIP5 PE=1 SV=1:550.821	-	KOG1286:Amino acid transporters	amino acid transmembrane transporter activity:GO:0015171;;transport:GO:0006810;;membrane:GO:0016020;;amino acid transport:GO:0006865	20.01.07 amino acid/amino acid derivatives transport S.cerevisiae	20.09.18.07 non-vesicular cellular import
estExt_Genewise1Plus.C_240308	estExt_Genewise1Plus.C_240308	estExt_Genewise1Plus.C_240308	scaffold_24:322284-324769	13.3194	0.422671	-4.97785	7.03557e-06	yes
estExt_Genewise1Plus.C_8_t10446	estExt_Genewise1Plus.C_8_t10446	estExt_Genewise1Plus.C_8_t10446	scaffold_8:573690-574723	99.5501	3.15701	-4.97879	8.48146e-08	yes	98934	-	-	-	KOG0977:Nuclear envelope protein lamin, intermediate filament superfamily	-
estExt_fgenesh1_pm.C_180153	estExt_fgenesh1_pm.C_180153	estExt_fgenesh1_pm.C_180153	scaffold_18:566685-568179	30.3928	0.930984	-5.02883	1.76263e-06	yes	138427	-	-	-	KOG1216:von Willebrand factor and related coagulation proteins	-
gm1.7373_g	gm1.7373_g	gm1.7373_g	scaffold_24:296348-298208	15.7858	0.47252	-5.0621	1.06933e-05	yes	11817	IPR006094:FAD linked oxidase, N-terminal;;IPR016166:FAD-binding, type 2;;IPR012951:Berberine/berberine-like	sp|P08159|HDNO_ARTOX 6-hydroxy-D-nicotine oxidase OS=Arthrobacter oxidans PE=1 SV=2:63.929	-	-	FAD binding:GO:0050660;;catalytic activity:GO:0003824;;oxidoreductase activity:GO:0016491	01.05 C-compound and carbohydrate metabolism
gm1.5135_g	gm1.5135_g	gm1.5135_g	scaffold_12:492554-495294	38.0473	1.1093	-5.10008	1.93804e-08	yes	9579	IPR000818:TEA/ATTS	sp|P20945|ABAA_EMENI Regulatory protein abaA OS=Emericella nidulans GN=abaA PE=4 SV=3:67.3958	-	KOG3841:TEF-1 and related transcription factor, TEAD family	regulation of transcription, DNA-dependent:GO:0006355;;nucleus:GO:0005634;;transcription factor activity:GO:0003700
e_gw1.68.2.1	e_gw1.68.2.1	e_gw1.68.2.1	scaffold_68:160-1846	37.1344	1.06708	-5.12101	1.24474e-07	yes
fgenesh1_pm.1_#_888	fgenesh1_pm.1_#_888	fgenesh1_pm.1_#_888	scaffold_1:3033116-3034054	105.279	3.00438	-5.13101	1.16227e-07	yes
estExt_fgenesh2_kg.C_410009	estExt_fgenesh2_kg.C_410009	estExt_fgenesh2_kg.C_410009	scaffold_41:41159-42459	75.1031	2.05245	-5.19346	5.92376e-07	yes	125426	-	sp|P22222|E13B_CELCE Glucan endo-1,3-beta-glucosidase OS=Cellulosimicrobium cellulans PE=1 SV=1:84.3445	-	-	-	01.05 C-compound and carbohydrate metabolism
estExt_Genewise1Plus.C_11_t20188	estExt_Genewise1Plus.C_11_t20188	estExt_Genewise1Plus.C_11_t20188	scaffold_11:865790-866559	40.9477	1.11348	-5.20063	0.000299949	yes
estExt_fgenesh1_pm.C_60048	estExt_fgenesh1_pm.C_60048	estExt_fgenesh1_pm.C_60048	scaffold_6:137459-139354	12.1726	0.322873	-5.23653	1.74243e-05	yes	136712	IPR005828:General substrate transporter;;IPR007114:Major facilitator superfamily;;IPR003663:Sugar transporter;;IPR016196:MFS general substrate transporter;;IPR005829:Sugar transporter, conserved site	sp|A2QQV6|QUTD_ASPNC Probable quinate permease OS=Aspergillus niger (strain CBS 513.88 / FGSC A1513) GN=qutD PE=3 SV=1:256.914	5.3.1.4:L-arabinose isomerase.	KOG0254:Predicted transporter (major facilitator superfamily)	sugar:hydrogen symporter activity:GO:0005351;;L-arabinose isomerase activity:GO:0008733;;carbohydrate transport:GO:0008643;;transporter activity:GO:0005215;;integral to membrane:GO:0016021;;transport:GO:0006810;;membrane:GO:0016020	01.05 C-compound and carbohydrate metabolism	01.05.25 regulation of C-compound and carbohydrate metabolism N.crassa	20.01.03 C-compound and carbohydrate transport	20.01.03.01 sugar transport	20.09.18 cellular import	20.09.18.07 non-vesicular cellular import	34.01.01.03 homeostasis of protons	34.11.03.07 pheromone response, mating-type determination, sex-specific proteins N.crassa	34.11.12 perception of nutrients and nutritional adaptation N.crassa	41.01 fungal/microorganismic development	20.03 transport facilities	20.03.02.02.01 proton driven symporter
estExt_fgenesh1_pm.C_60404	estExt_fgenesh1_pm.C_60404	estExt_fgenesh1_pm.C_60404	scaffold_6:1236838-1238931	218.015	5.69045	-5.25974	2.49662e-10	yes	136860	IPR016161:Aldehyde/histidinol dehydrogenase;;IPR016160:Aldehyde dehydrogenase, conserved site;;IPR001998:Xylose isomerase;;IPR015590:Aldehyde dehydrogenase	sp|P33008|ALDH_PSESP Probable aldehyde dehydrogenase OS=Pseudomonas sp. GN=terPE PE=3 SV=1:308.145	1.2.1.3:Aldehyde dehydrogenase (NAD+).	KOG2450:Aldehyde dehydrogenase	metabolic process:GO:0008152;;carbohydrate metabolic process:GO:0005975;;aldehyde dehydrogenase (NAD) activity:GO:0004029;;oxidoreductase activity:GO:0016491;;xylose isomerase activity:GO:0009045	01.01 amino acid metabolism	01.01.03.02 metabolism of glutamate	01.01.05.01.02 degradation of polyamines	01.05 C-compound and carbohydrate metabolism	01.05.06.07 C-2 compound and organic acid catabolism S.cerevisiae	01.06 lipid, fatty acid and isoprenoid metabolism	01.06.06 isoprenoid metabolism	01.07 metabolism of vitamins, cofactors, and prosthetic groups N.crassa	01.07.01 biosynthesis of vitamins, cofactors, and prosthetic groups	01.20.05 metabolism of acetic acid derivatives	01.20.17.01 metabolism of nonprotein amino acids	01.20.31 metabolism of secondary products derived from L-lysine, L-arginine and L-histidine	02.11 electron transport and membrane-associated energy conservation S.cerevisiae	02.13 respiration	02.16 fermentation	02.16.01 alcohol fermentation	02.45 energy conversion and regeneration	20.01.15 electron transport	32.01 stress response	32.01.03 osmotic and salt stress response	32.05.01 resistance proteins	32.05.03 defense related proteins	32.07.03 detoxification by modification	32.07.09 detoxification by degradation	42.16 mitochondrion	16.13 C-compound binding	16.21.07 NAD/NADP binding
fgenesh1_pm.35_#_43	fgenesh1_pm.35_#_43	fgenesh1_pm.35_#_43	scaffold_35:142762-144548	14.9636	0.382517	-5.28979	1.32521e-05	yes	134605	-	-	-	KOG1869:Splicing coactivator SRm160/300, subunit SRm300	-
e_gw1.3.246.1	e_gw1.3.246.1	e_gw1.3.246.1	scaffold_3:1649458-1650805	68.1	1.61773	-5.39561	8.69078e-09	yes	73642	IPR005152:Secretory lipase	sp|O94091|LIP1_CANAL Lipase 1 OS=Candida albicans GN=LIP1 PE=3 SV=2:210.69	-	-	-
estExt_Genemark1.C_90201	estExt_Genemark1.C_90201	estExt_Genemark1.C_90201	scaffold_9:785820-787148	14.0308	0.32934	-5.41288	3.11812e-06	yes	25062	IPR011059:Metal-dependent hydrolase, composite;;IPR006680:Amidohydrolase 1	sp|P40896|YJV3_YEAST Uncharacterized protein YJL213W OS=Saccharomyces cerevisiae (strain ATCC 204508 / S288c) GN=YJL213W PE=2 SV=1:342.428	-	-	hydrolase activity, acting on carbon-nitrogen (but not peptide) bonds:GO:0016810;;hydrolase activity:GO:0016787
estExt_fgenesh2_kg.C_50110	estExt_fgenesh2_kg.C_50110	estExt_fgenesh2_kg.C_50110	scaffold_5:1099018-1099636	14.1641	0.331799	-5.41578	0.00983494	yes
e_gw1.5.334.1	e_gw1.5.334.1	e_gw1.5.334.1	scaffold_5:218064-222476	18.6885	0.429483	-5.44341	5.99629e-09	yes	75459	IPR003593:AAA+ ATPase, core;;IPR010929:CDR ABC transporter;;IPR013525:ABC-2 type transporter;;IPR003439:ABC transporter-like	sp|O74676|CDR4_CANAL ABC transporter CDR4 OS=Candida albicans GN=CDR4 PE=3 SV=1:1482.23	-	KOG0065:Pleiotropic drug resistance proteins (PDR1-15), ABC superfamily	nucleoside-triphosphatase activity:GO:0017111;;ATP binding:GO:0005524;;integral to membrane:GO:0016021;;transport:GO:0006810;;ATPase activity:GO:0016887;;ATPase activity, coupled to transmembrane movement of substances:GO:0042626;;nucleotide binding:GO:0000166	01.04 phosphate metabolism	01.05 C-compound and carbohydrate metabolism	20.01.01.01 cation transport (H+, Na+, K+, Ca2+ , NH4+, etc.) S.cerevisiae	20.01.03 C-compound and carbohydrate transport	20.01.13 lipid/fatty acid transport	20.01.27 drug/toxin transport	20.09.16.01 Type I protein secretion system (ABC-type transport systems) N.crassa	32.01.01 oxidative stress response	32.05.01.03 chemical agent resistance	32.07 detoxification	32.07.05 detoxification by export	34.01.01.01 homeostasis of metal ions (Na, K, Ca etc.) S.cerevisiae	16.19.03 ATP binding	20.03.22 transport ATPases	20.03.25 ABC transporters
estExt_Genemark1.C_350042	estExt_Genemark1.C_350042	estExt_Genemark1.C_350042	scaffold_35:139844-140655	236.305	5.35281	-5.46421	5.44945e-10	yes
estExt_Genewise1Plus.C_210374	estExt_Genewise1Plus.C_210374	estExt_Genewise1Plus.C_210374	scaffold_21:479708-480822	302.392	6.18825	-5.61074	3.61409e-11	yes	102903	IPR007466:Peptidyl-arginine deiminase, Porphyromonas-type	sp|Q8GWW7|AGUA_ARATH Agmatine deiminase OS=Arabidopsis thaliana GN=AIH PE=1 SV=2:201.06	-	-	-	01.02.02.09 catabolism of nitrogenous compounds
fgenesh1_pg.4_#_259	fgenesh1_pg.4_#_259	fgenesh1_pg.4_#_259	scaffold_4:969166-973591	1222.03	23.3659	-5.70873	1.99426e-08	yes	33912	IPR003593:AAA+ ATPase, core;;IPR011527:ABC transporter, transmembrane region, type 1;;IPR001140:ABC transporter, transmembrane region;;IPR003439:ABC transporter-like	sp|P36619|PMD1_SCHPO Leptomycin B resistance protein pmd1 OS=Schizosaccharomyces pombe (strain ATCC 38366 / 972) GN=pmd1 PE=2 SV=2:296.975;;sp|P36619|PMD1_SCHPO Leptomycin B resistance protein pmd1 OS=Schizosaccharomyces pombe (strain ATCC 38366 / 972) GN=pmd1 PE=2 SV=2:857.055	-	KOG0055:Multidrug/pheromone exporter, ABC superfamily	nucleoside-triphosphatase activity:GO:0017111;;ATP binding:GO:0005524;;integral to membrane:GO:0016021;;ATPase activity:GO:0016887;;transport:GO:0006810;;nucleotide binding:GO:0000166;;ATPase activity, coupled to transmembrane movement of substances:GO:0042626	01.04 phosphate metabolism	20.01.01.01 cation transport (H+, Na+, K+, Ca2+ , NH4+, etc.)	20.01.03 C-compound and carbohydrate transport	20.01.09 peptide transport	20.01.27 drug/toxin transport	20.09.16 cellular export and secretion	20.09.16.01 Type I protein secretion system (ABC-type transport systems) N.crassa	32.05.01 resistance proteins	32.07.05 detoxification by export	34.11.03 chemoperception and response	34.11.03.07 pheromone response, mating-type determination, sex-specific proteins S.cerevisiae	16.19 nucleotide/nucleoside/nucleobase binding	16.19.03 ATP binding	20.03 transport facilities	20.03.22 transport ATPases	20.03.25 ABC transporters
estExt_fgenesh1_pg.C_240100	estExt_fgenesh1_pg.C_240100	estExt_fgenesh1_pg.C_240100	scaffold_24:325942-327921	93.2774	1.70088	-5.77718	4.35143e-11	yes	142761	-	sp|Q55DH0|Y1320_DICDI PI-PLC X domain-containing protein DDB_G0269228 OS=Dictyostelium discoideum GN=DDB_G0269228 PE=2 SV=1:60.077	-	KOG4306:Glycosylphosphatidylinositol-specific phospholipase C	-
estExt_Genemark1.C_140071	estExt_Genemark1.C_140071	estExt_Genemark1.C_140071	scaffold_14:253869-256407	65.3685	1.09162	-5.90405	3.48497e-11	yes	25615	IPR005887:Alpha-1,2-mannosidase, putative;;IPR012939:Glycosyl hydrolase 92	-	-	-	-
e_gw1.5.616.1	e_gw1.5.616.1	e_gw1.5.616.1	scaffold_5:106018-106594	86.5069	1.25069	-6.11202	6.55932e-06	yes	75852	IPR001763:Rhodanese-like	sp|Q06597|ARR2_YEAST Arsenical-resistance protein 2 OS=Saccharomyces cerevisiae (strain ATCC 204508 / S288c) GN=ARR2 PE=1 SV=1:53.1434	-	KOG3772:M-phase inducer phosphatase	-
estExt_Genewise1Plus.C_11_t20002	estExt_Genewise1Plus.C_11_t20002	estExt_Genewise1Plus.C_11_t20002	scaffold_11:629366-631644	38.4094	0.486077	-6.30413	1.112e-10	yes	100172	IPR002867:Zinc finger, C6HC-type	sp|Q6T486|RBRA_DICDI Probable E3 ubiquitin-protein ligase rbrA OS=Dictyostelium discoideum GN=rbrA PE=3 SV=1:57.7658	-	KOG1812:Predicted E3 ubiquitin ligase	zinc ion binding:GO:0008270
fgenesh1_pg.6_#_275	fgenesh1_pg.6_#_275	fgenesh1_pg.6_#_275	scaffold_6:950937-953679	19.1055	0.235305	-6.34331	9.47265e-09	yes	34700	-	-	3.2.1.3:Glucan 1,4-alpha-glucosidase.	KOG1869:Splicing coactivator SRm160/300, subunit SRm300	glucan 1,4-alpha-glucosidase activity:GO:0004339
e_gw1.23.301.1	e_gw1.23.301.1	e_gw1.23.301.1	scaffold_23:358833-359631	18.1545	0.219355	-6.37092	0.00104598	yes	88289	IPR013216:Methyltransferase type 11	sp|Q9C6B9|PEAM3_ARATH Phosphoethanolamine N-methyltransferase 3 OS=Arabidopsis thaliana GN=NMT3 PE=2 SV=2:71.2478	2.1.1.103:Phosphoethanolamine N-methyltransferase.	KOG1269:SAM-dependent methyltransferases	metabolic process:GO:0008152;;phosphoethanolamine N-methyltransferase activity:GO:0000234;;methyltransferase activity:GO:0008168
estExt_Genewise1Plus.C_1_t20271	estExt_Genewise1Plus.C_1_t20271	estExt_Genewise1Plus.C_1_t20271	scaffold_1:977340-978712	22.7524	0.259413	-6.45462	1.12583e-06	yes	94061	IPR017853:Glycoside hydrolase, catalytic core;;IPR001223:Glycoside hydrolase, family 18, catalytic domain;;IPR001579:Glycoside hydrolase, chitinase active site	sp|P29025|CHI1_RHINI Chitinase 1 OS=Rhizopus niveus GN=CHI1 PE=3 SV=1:206.453	3.2.1.14:Chitinase.	KOG4701:Chitinase	endochitinase activity:GO:0008843;;hydrolase activity, hydrolyzing O-glycosyl compounds:GO:0004553;;carbohydrate metabolic process:GO:0005975;;chitinase activity:GO:0004568	01.05.03 polysaccharide metabolism
estExt_fgenesh1_pm.C_270029	estExt_fgenesh1_pm.C_270029	estExt_fgenesh1_pm.C_270029	scaffold_27:108659-112768	159.071	1.80733	-6.45967	5.95542e-14	yes	139005	IPR008250:E1-E2 ATPase-associated region;;IPR001757:ATPase, P-type, K/Mg/Cd/Cu/Zn/Na/Ca/Na/H-transporter;;IPR005834:Haloacid dehalogenase-like hydrolase;;IPR004014:ATPase, P-type cation-transporter, N-terminal;;IPR006068:ATPase, P-type cation-transporter, C-terminal;;IPR006414:Potassium/sodium efflux P-type ATPase, fungal-type	sp|P22189|ATC3_SCHPO Calcium-transporting ATPase 3 OS=Schizosaccharomyces pombe (strain ATCC 38366 / 972) GN=cta3 PE=1 SV=1:899.427	3.6.3.8:Calcium-transporting ATPase.	KOG0202:Ca2+ transporting ATPase	cation transport:GO:0006812;;integral to membrane:GO:0016021;;ATPase activity, coupled to transmembrane movement of ions, phosphorylative mechanism:GO:0015662;;membrane:GO:0016020;;hydrolase activity, acting on acid anhydrides, catalyzing transmembrane movement of substances:GO:0016820;;calcium-transporting ATPase activity:GO:0005388;;ATP binding:GO:0005524;;metabolic process:GO:0008152;;catalyti…	20.01.01.01 cation transport (H+, Na+, K+, Ca2+ , NH4+, etc.) N.crassa	20.09 transport routes	32.01.04 pH stress response	34.01.01 homeostasis of cations	34.01.01.01 homeostasis of metal ions (Na, K, Ca etc.) N.crassa	20.03.22 transport ATPases
estExt_fgenesh1_pg.C_170090	estExt_fgenesh1_pg.C_170090	estExt_fgenesh1_pg.C_170090	scaffold_17:362689-363901	130.568	1.47907	-6.46397	4.19569e-12	yes	142298	IPR017853:Glycoside hydrolase, catalytic core	sp|P29026|CHI1_RHIOL Chitinase 1 OS=Rhizopus oligosporus GN=CHI1 PE=1 SV=1:52.373	-	-	-	01.05 C-compound and carbohydrate metabolism	42.01 cell wall
gm1.8021_g	gm1.8021_g	gm1.8021_g	scaffold_30:77303-78540	48.2541	0.521148	-6.53281	6.18512e-09	yes	12465	IPR003042:Aromatic-ring hydroxylase;;IPR002938:Monooxygenase, FAD-binding	sp|Q01911|TETX_BACFR Tetracycline resistance protein from transposon Tn4351/Tn4400 OS=Bacteroides fragilis GN=tetX PE=4 SV=1:150.599	1.14.13.9:Kynurenine 3-monooxygenase.	KOG2614:Kynurenine 3-monooxygenase and related flavoprotein monooxygenases	metabolic process:GO:0008152;;aromatic compound metabolic process:GO:0006725;;electron transport:GO:0006118;;kynurenine 3-monooxygenase activity:GO:0004502;;oxidoreductase activity:GO:0016491;;monooxygenase activity:GO:0004497
estExt_Genewise1Plus.C_12_t10330	estExt_Genewise1Plus.C_12_t10330	estExt_Genewise1Plus.C_12_t10330	scaffold_12:466850-467846	17.4748	0.181711	-6.58748	0.000594165	yes	100485	IPR016040:NAD(P)-binding;;IPR002347:Glucose/ribitol dehydrogenase;;IPR002198:Short-chain dehydrogenase/reductase SDR	sp|Q7Z9I4|YCP6_SCHPO Uncharacterized oxidoreductase C663.06c OS=Schizosaccharomyces pombe (strain ATCC 38366 / 972) GN=SPCC663.06c PE=2 SV=1:93.9745	1.1.1.-:With NAD(+) or NADP(+) as acceptor.	KOG1611:Predicted short chain-type dehydrogenase	mevaldate reductase activity:GO:0004495;;epoxide dehydrogenase activity:GO:0018451;;steroid dehydrogenase activity:GO:0016229;;steroid dehydrogenase activity, acting on the CH-CH group of donors:GO:0033765;;metabolic process:GO:0008152;;3-keto sterol reductase activity:GO:0000253;;(R)-2-hydroxyglutarate dehydrogenase activity:GO:0051990;;catalytic activity:GO:0003824;;oxidoreductase activity:GO:0…	01.01 amino acid metabolism	01.05 C-compound and carbohydrate metabolism	01.05.03 polysaccharide metabolism	01.05.09.04 aminosaccharide anabolism	01.06 lipid, fatty acid and isoprenoid metabolism	01.06.05 fatty acid metabolism	01.20 secondary metabolism	01.20.05.09 metabolism of eicosanoids	01.20.19.01 metabolism of porphyrins	10.03.01 mitotic cell cycle and cell cycle control	30.05.01.18.01 TGF-beta-receptor signalling pathway	30.05.02.24 G-protein coupled receptor signalling pathway	32.05.05 virulence, disease factors	16.01 protein binding	16.21.07 NAD/NADP binding
e_gw1.8.444.1	e_gw1.8.444.1	e_gw1.8.444.1	scaffold_8:1069198-1070357	311.071	2.69912	-6.84861	5.95542e-14	yes	79175	IPR000791:GPR1/FUN34/yaaH	sp|Q24JP1|ALCS_ASPFU Protein alcS OS=Neosartorya fumigata (strain ATCC MYA-4609 / Af293 / CBS 101355 / FGSC A1100) GN=alcS PE=3 SV=1:214.542	-	-	membrane:GO:0016020
estExt_Genewise1.C_300128	estExt_Genewise1.C_300128	estExt_Genewise1.C_300128	scaffold_30:122505-124706	248.646	2.01516	-6.94706	0	yes	115868	IPR012132:Glucose-methanol-choline oxidoreductase;;IPR007867:Glucose-methanol-choline oxidoreductase, C-terminal;;IPR000172:Glucose-methanol-choline oxidoreductase, N-terminal	sp|P04841|ALOX_PICAN Alcohol oxidase OS=Pichia angusta GN=MOX PE=3 SV=1:452.981	1.1.99.1:Choline dehydrogenase.	KOG1238:Glucose dehydrogenase/choline dehydrogenase/mandelonitrile lyase (GMC oxidoreductase family)	oxidoreductase activity, acting on CH-OH group of donors:GO:0016614;;FAD binding:GO:0050660;;alcohol metabolic process:GO:0006066;;choline dehydrogenase activity:GO:0008812	01.01.09.01.01 biosynthesis of glycine	01.05 C-compound and carbohydrate metabolism	01.20.17.03 metabolism of amines	20.01.15 electron transport	16.21.05 FAD/FMN binding	16.21.07 NAD/NADP binding
fgenesh1_pm.31_#_39	fgenesh1_pm.31_#_39	fgenesh1_pm.31_#_39	scaffold_31:112397-112829	535.453	4.22649	-6.98516	1.59822e-11	yes
estExt_Genewise1Plus.C_1_t30019	estExt_Genewise1Plus.C_1_t30019	estExt_Genewise1Plus.C_1_t30019	scaffold_1:1347820-1348929	90.3281	0.676209	-7.06156	1.18527e-10	yes	94189	IPR001314:Peptidase S1A, chymotrypsin;;IPR001254:Peptidase S1 and S6, chymotrypsin/Hap;;IPR009003:Peptidase, trypsin-like serine and cysteine	sp|P35049|TRYP_FUSOX Trypsin OS=Fusarium oxysporum PE=1 SV=1:224.557	3.4.21.4:Trypsin.	KOG3627:Trypsin	serine-type endopeptidase activity:GO:0004252;;trypsin activity:GO:0004295;;catalytic activity:GO:0003824;;proteolysis:GO:0006508	14.07.11 protein processing (proteolytic)	14.13 protein/peptide degradation	14.13.01 cytoplasmic and nuclear protein degradation	20.01.01 ion transport	20.01.01.01 cation transport (H+, Na+, K+, Ca2+ , NH4+, etc.)	20.01.15 electron transport	30.01.05.03 protease mediated signal transduction	30.05 transmembrane signal transduction	34.07 cell adhesion	34.11.12 perception of nutrients and nutritional adaptation	40.01.03.01 regulation of directional cell growth	40.01.05 growth regulators / regulation of cell size &nbsp;	16.01 protein binding	16.05 polysaccharide binding	16.09 lipid binding	16.17 metal binding	16.17.01 calcium binding	16.17.05 sodium binding	16.17.09 heavy metal binding (Cu, Fe, Zn)	18.02.10 regulation of channel activity
estExt_Genewise1Plus.C_18_t20048	estExt_Genewise1Plus.C_18_t20048	estExt_Genewise1Plus.C_18_t20048	scaffold_18:678783-679668	89.4565	0.618463	-7.17635	5.9852e-12	yes	102293	IPR000028:Chloroperoxidase	sp|P04963|PRXC_CALFU Chloroperoxidase OS=Caldariomyces fumago GN=CPO PE=1 SV=3:82.4185	-	-	electron transport:GO:0006118;;peroxidase activity:GO:0004601
gw1.9.199.1	gw1.9.199.1	gw1.9.199.1	scaffold_9:594707-596412	19.5771	0.124441	-7.29757	8.05153e-05	yes	45579	IPR007114:Major facilitator superfamily;;IPR011701:Major facilitator superfamily MFS-1;;IPR016196:MFS general substrate transporter	sp|Q08268|MCH4_YEAST Probable transporter MCH4 OS=Saccharomyces cerevisiae (strain ATCC 204508 / S288c) GN=MCH4 PE=1 SV=1:153.295	-	KOG2504:Monocarboxylate transporter	transporter activity:GO:0005215;;integral to membrane:GO:0016021;;transport:GO:0006810	20.01.03 C-compound and carbohydrate transport	20.09.18.07 non-vesicular cellular import	20.03 transport facilities
estExt_Genewise1.C_12_t20163	estExt_Genewise1.C_12_t20163	estExt_Genewise1.C_12_t20163	scaffold_12:871963-873896	519.576	3.01095	-7.43097	0	yes	112243	IPR005198:Glycoside hydrolase, family 76;;IPR008928:Six-hairpin glycosidase-like;;IPR014480:Mannan endo-1,6-alpha-mannosidase	sp|P36091|DCW1_YEAST Mannan endo-1,6-alpha-mannosidase DCW1 OS=Saccharomyces cerevisiae (strain ATCC 204508 / S288c) GN=DCW1 PE=1 SV=1:340.117	3.2.1.101:Mannan endo-1,6-beta-mannosidase.	-	mannan endo-1,6-alpha-mannosidase activity:GO:0008496;;catalytic activity:GO:0003824	40.01 cell growth / morphogenesis	40.01.03 directional cell growth (morphogenesis) N.crassa	42.01 cell wall	42.04 cytoskeleton/structural proteins	43.01.03 fungal and other eukaryotic cell type differentiation N.crassa	43.01.03.05 budding, cell polarity and filament formation N.crassa
e_gw1.4.746.1	e_gw1.4.746.1	e_gw1.4.746.1	scaffold_4:124855-126950	161.659	0.90643	-7.47854	0	yes	74437	IPR005828:General substrate transporter;;IPR007114:Major facilitator superfamily;;IPR003663:Sugar transporter;;IPR016196:MFS general substrate transporter;;IPR005829:Sugar transporter, conserved site	sp|Q9XIH7|PLT1_ARATH Putative polyol transporter 1 OS=Arabidopsis thaliana GN=PLT1 PE=2 SV=1:196.052	5.3.1.4:L-arabinose isomerase.	KOG0254:Predicted transporter (major facilitator superfamily)	sugar:hydrogen symporter activity:GO:0005351;;L-arabinose isomerase activity:GO:0008733;;carbohydrate transport:GO:0008643;;transporter activity:GO:0005215;;integral to membrane:GO:0016021;;transport:GO:0006810;;membrane:GO:0016020	01.05 C-compound and carbohydrate metabolism	01.06 lipid, fatty acid and isoprenoid metabolism N.crassa	20.01.03 C-compound and carbohydrate transport	20.01.13 lipid/fatty acid transport	20.09.16 cellular export and secretion	20.09.18 cellular import	20.09.18.07 non-vesicular cellular import	20.03 transport facilities
estExt_Genewise1Plus.C_1_t10173	estExt_Genewise1Plus.C_1_t10173	estExt_Genewise1Plus.C_1_t10173	scaffold_1:229005-229800	1109.98	5.96648	-7.53944	0	yes	93769	-	sp|P40092|SPI1_YEAST Uncharacterized cell wall protein SPI1 OS=Saccharomyces cerevisiae (strain ATCC 204508 / S288c) GN=SPI1 PE=2 SV=1:68.5514	-	-	-
estExt_fgenesh1_pm.C_40040	estExt_fgenesh1_pm.C_40040	estExt_fgenesh1_pm.C_40040	scaffold_4:122367-123752	1144.7	5.77137	-7.63185	0	yes	136351	IPR001585:Transaldolase	sp|B2J2D9|TAL_NOSP7 Transaldolase OS=Nostoc punctiforme (strain ATCC 29133 / PCC 73102) GN=tal PE=3 SV=1:100.138	2.2.1.2:Transaldolase.	KOG2772:Transaldolase	carbohydrate metabolic process:GO:0005975;;transaldolase activity:GO:0004801
estExt_fgenesh2_kg.C_340005	estExt_fgenesh2_kg.C_340005	estExt_fgenesh2_kg.C_340005	scaffold_34:11029-11802	2207.66	10.8703	-7.66599	0	yes
gm1.966_g	gm1.966_g	gm1.966_g	scaffold_1:3422073-3423078	131.266	0.631311	-7.69993	9.89516e-13	yes	5410	IPR002889:Carbohydrate-binding WSC	-	-	-	-
estExt_Genewise1Plus.C_220046	estExt_Genewise1Plus.C_220046	estExt_Genewise1Plus.C_220046	scaffold_22:61215-65334	281.421	1.2275	-7.84086	0	yes	102957	IPR011052:Proteinase and amylase inhibitor;;IPR000737:Proteinase inhibitor I7, squash	-	2.7.1.-:Phosphotransferases with an alcohol group as acceptor.	KOG1217:Fibrillins and related proteins containing Ca2+-binding EGF-like domains	LPPG:FO 2-phospho-L-lactate transferase activity:GO:0043743;;(S)-lactate 2-kinase activity:GO:0043841;;cytidine kinase activity:GO:0043771;;phosphatidylinositol phosphate kinase activity:GO:0016307;;glycerate 2-kinase activity:GO:0043798;;eukaryotic elongation factor-2 kinase regulator activity:GO:0042556;;serine-type endopeptidase inhibitor activity:GO:0004867;;inositol tetrakisphosphate 2-kinas…
estExt_Genewise1.C_300261	estExt_Genewise1.C_300261	estExt_Genewise1.C_300261	scaffold_30:290932-291667	1030.9	4.49054	-7.8428	0	yes	115921	IPR010829:Cerato-platanin	sp|O74238|SNP1_PHANO Protein SnodProt1 OS=Phaeosphaeria nodorum GN=SNOG_13722 PE=2 SV=1:134.42	-	-	-
e_gw1.9.665.1	e_gw1.9.665.1	e_gw1.9.665.1	scaffold_9:1072359-1072974	199.438	0.80858	-7.94633	1.26833e-10	yes	80148	IPR015141:Phospholipase A2, prokaryotic/fungal;;IPR016090:Phospholipase A2	-	-	-	-
estExt_Genewise1Plus.C_6_t20092	estExt_Genewise1Plus.C_6_t20092	estExt_Genewise1Plus.C_6_t20092	scaffold_6:626514-627629	80.0674	0.296379	-8.07763	5.67471e-11	yes
estExt_fgenesh1_pg.C_90227	estExt_fgenesh1_pg.C_90227	estExt_fgenesh1_pg.C_90227	scaffold_9:883494-884747	57.9989	0.160216	-8.49987	1.41983e-06	yes	141480	IPR012269:Aquaporin;;IPR000425:Major intrinsic protein	sp|P43549|YFF4_YEAST Uncharacterized membrane protein YFL054C OS=Saccharomyces cerevisiae (strain ATCC 204508 / S288c) GN=YFL054C PE=1 SV=1:207.994	-	KOG0224:Aquaporin (major intrinsic protein family)	transporter activity:GO:0005215;;integral to membrane:GO:0016021;;transport:GO:0006810;;membrane:GO:0016020	20.01.03 C-compound and carbohydrate transport	20.09.18 cellular import	20.03.01 channel / pore class transport
estExt_fgenesh2_kg.C_190036	estExt_fgenesh2_kg.C_190036	estExt_fgenesh2_kg.C_190036	scaffold_19:272795-273415	3694.78	9.10131	-8.6652	0	yes
estExt_Genewise1Plus.C_350017	estExt_Genewise1Plus.C_350017	estExt_Genewise1Plus.C_350017	scaffold_35:23877-25343	163.799	0.330899	-8.95132	0	yes	104564	IPR001969:Peptidase aspartic, active site;;IPR001461:Peptidase A1;;IPR009007:Peptidase aspartic, catalytic	sp|O13340|CARP_PODAN Podosporapepsin OS=Podospora anserina GN=PAPA PE=2 SV=1:297.36	3.4.23.18:Aspergillopepsin I.	KOG1339:Aspartyl protease	aspartic-type endopeptidase activity:GO:0004190;;pepsin A activity:GO:0004194;;proteolysis:GO:0006508	01.25.03 extracellular protein degradation	14.13 protein/peptide degradation	14.13.04 lysosomal and vacuolar protein degradation N.crassa	42.27 extracellular / secretion proteins
estExt_Genewise1.C_340008	estExt_Genewise1.C_340008	estExt_Genewise1.C_340008	scaffold_34:2729-9681	144.891	0.279185	-9.01953	0	yes	116130	IPR014031:Beta-ketoacyl synthase, C-terminal;;IPR016035:Acyl transferase/acyl hydrolase/lysophospholipase;;IPR016039:Thiolase-like;;IPR006163:Phosphopantetheine-binding;;IPR014043:Acyl transferase;;IPR001031:Thioesterase;;IPR016036:Malonyl-CoA ACP transacylase, ACP-binding;;IPR006162:Phosphopantetheine attachment site;;IPR014030:Beta-ketoacyl synthase, N-terminal;;IPR009081:Acyl carrier protein-l…	sp|Q03149|WA_EMENI Conidial yellow pigment biosynthesis polyketide synthase OS=Emericella nidulans GN=wA PE=1 SV=2:1956.41	-	KOG1202:Animal-type fatty acid synthase and related proteins	phosphopantetheine binding:GO:0031177;;metabolic process:GO:0008152;;cofactor binding:GO:0048037;;catalytic activity:GO:0003824;;biosynthetic process:GO:0009058;;binding:GO:0005488;;hydrolase activity, acting on ester bonds:GO:0016788
estExt_Genemark1.C_60015	estExt_Genemark1.C_60015	estExt_Genemark1.C_60015	scaffold_6:47167-48558	66.4395	0.118491	-9.13112	1.24474e-07	yes	24449	IPR000209:Peptidase S8 and S53, subtilisin, kexin, sedolisin;;IPR010259:Proteinase inhibitor I9, subtilisin propeptide;;IPR009020:Proteinase inhibitor, propeptide	sp|Q03420|ALP_TRIAT Alkaline proteinase OS=Trichoderma atroviride GN=prb1 PE=1 SV=1:719.153	3.4.21.-:Serine endopeptidases.	KOG1153:Subtilisin-related protease/Vacuolar protease B	identical protein binding:GO:0042802;;serine-type signal peptidase activity:GO:0008991;;proprotein convertase activity:GO:0016808;;proteolysis:GO:0006508;;negative regulation of catalytic activity:GO:0043086;;pancreatic elastase activity:GO:0008132;;plasminogen activator activity:GO:0008243;;subtilase activity:GO:0004289	14.07.11 protein processing (proteolytic)	14.13 protein/peptide degradation	14.13.04 lysosomal and vacuolar protein degradation S.cerevisiae
estExt_Genewise1Plus.C_340014	estExt_Genewise1Plus.C_340014	estExt_Genewise1Plus.C_340014	scaffold_34:12608-14881	310.443	0.553003	-9.13283	0	yes	104519	IPR011707:Multicopper oxidase, type 3;;IPR011706:Multicopper oxidase, type 2;;IPR001117:Multicopper oxidase, type 1;;IPR002355:Multicopper oxidase, copper-binding site;;IPR008972:Cupredoxin	sp|P17489|LAC1_EMENI Laccase-1 OS=Emericella nidulans GN=yA PE=2 SV=3:434.491	1.10.3.3:L-ascorbate oxidase.	KOG1263:Multicopper oxidases	L-ascorbate oxidase activity:GO:0008447;;copper ion binding:GO:0005507;;oxidoreductase activity:GO:0016491	01.07.04 utilization of vitamins, cofactors, and prosthetic groups A.thaliana
fgenesh1_pg.6_#_144	fgenesh1_pg.6_#_144	fgenesh1_pg.6_#_144	scaffold_6:469810-470245	2878.3	4.53521	-9.30983	0	yes	34569	IPR010636:Hydrophobin 2	sp|Q9UVI4|THYD_CLAFS Trihydrophobin OS=Claviceps fusiformis GN=TH1 PE=1 SV=1:57.3806;;sp|Q9UVI4|THYD_CLAFS Trihydrophobin OS=Claviceps fusiformis GN=TH1 PE=1 SV=1:53.1434	-	-	cell communication:GO:0007154;;cell wall:GO:0005618;;extracellular region:GO:0005576
estExt_fgenesh2_kg.C_150101	estExt_fgenesh2_kg.C_150101	estExt_fgenesh2_kg.C_150101	scaffold_15:750693-751235	3694.48	5.36269	-9.4282	0	yes
fgenesh1_pm.11_#_14	fgenesh1_pm.11_#_14	fgenesh1_pm.11_#_14	scaffold_11:35046-36692	526.38	0.562688	-9.86955	0	yes	130681	IPR011009:Protein kinase-like	-	-	KOG1216:von Willebrand factor and related coagulation proteins	-
estExt_Genewise1Plus.C_2_t20346	estExt_Genewise1Plus.C_2_t20346	estExt_Genewise1Plus.C_2_t20346	scaffold_2:1050443-1053036	64.2991	0.0596396	-10.0743	2.7925e-09	yes	95463	IPR002889:Carbohydrate-binding WSC;;IPR013994:Carbohydrate-binding WSC, subgroup;;IPR008985:Concanavalin A-like lectin/glucanase	sp|Q2UIE6|EGLX_ASPOR Probable endo-1,3(4)-beta-glucanase AO090023000083 OS=Aspergillus oryzae (strain ATCC 42149 / RIB 40) GN=AO090023000083 PE=3 SV=1:267.314	-	KOG1187:Serine/threonine protein kinase	-
[truncated: 2 more columns]
