# Supplementary material for: RNA Sequencing Reveals Xyr1 as a Transcription Factor Regulating Gene Expression beyond Carbohydrate Metabolism
Source: Hindawi journal article supplement (doi:10.1155/2016/4841756), 2016-01-01
Supplement: f1 [file 4841756.f1.zip › addition files/Table S10. Rut-30 (glucose)-and-Rut-C30 (lignocellulose)-DE.tbl-carbohydrate metabolism genes.xlsx]

## Sheet: Sheet1
Model	gene_id	gene	locus	FPKM_Rut-C30_glucose	FPKM_Rut-C30_lignocellulose	log2(fold_change(Rut-C30_lignocellulose/Rut-C30_glucose))	FDR_value	significant	Protein ID a	IPRScan	SPROT	KEGG	KOG	GO	Funcat2
e_gw1.24.392.1	e_gw1.24.392.1	e_gw1.24.392.1	scaffold_24:488054-488824	0.266469	484.831	10.8293	6.24e-12	yes	88887	IPR008262:Lipase, active site;;IPR000675:Cutinase	sp|Q99034|AXE1_TRIRE Acetylxylan esterase OS=Trichoderma reesei GN=axe1 PE=1 SV=1:312.768	-	-	metabolic process:GO:0008152;;hydrolase activity:GO:0016787;;catalytic activity:GO:0003824	01.05.03 polysaccharide metabolism	16.05 polysaccharide binding
estExt_fgenesh2_kg.C_30102	estExt_fgenesh2_kg.C_30102	estExt_fgenesh2_kg.C_30102	scaffold_3:818061-819609	0.0907808	152.895	10.7179	1.64e-11	yes	122377	IPR017853:Glycoside hydrolase, catalytic core;;IPR001547:Glycoside hydrolase, family 5;;IPR000254:Cellulose-binding region, fungal	sp|Q2TXJ2|MANA_ASPOR Probable mannan endo-1,4-beta-mannosidase A OS=Aspergillus oryzae (strain ATCC 42149 / RIB 40) GN=manA PE=3 SV=1:444.891	-	-	cellulose binding:GO:0030248;;hydrolase activity, hydrolyzing O-glycosyl compounds:GO:0004553;;carbohydrate metabolic process:GO:0005975;;extracellular region:GO:0005576
estExt_fgenesh1_pg.C_1_t10122	estExt_fgenesh1_pg.C_1_t10122	estExt_fgenesh1_pg.C_1_t10122	scaffold_1:516918-518027	1.03799	1607.74	10.597	0	yes	139631	IPR008262:Lipase, active site;;IPR000254:Cellulose-binding region, fungal;;IPR000675:Cutinase	sp|Q99034|AXE1_TRIRE Acetylxylan esterase OS=Trichoderma reesei GN=axe1 PE=1 SV=1:610.527	-	-	metabolic process:GO:0008152;;cellulose binding:GO:0030248;;hydrolase activity, hydrolyzing O-glycosyl compounds:GO:0004553;;carbohydrate metabolic process:GO:0005975;;hydrolase activity:GO:0016787;;catalytic activity:GO:0003824;;extracellular region:GO:0005576	01.05.03 polysaccharide metabolism	16.05 polysaccharide binding
estExt_fgenesh2_kg.C_540002	estExt_fgenesh2_kg.C_540002	estExt_fgenesh2_kg.C_540002	scaffold_54:22710-24150	0.280924	431.928	10.5864	0	yes	125575	IPR000254:Cellulose-binding region, fungal	sp|P49075|GUX3_AGABI Exoglucanase 3 OS=Agaricus bisporus GN=cel3 PE=1 SV=1:77.411	-	-	cellulose binding:GO:0030248;;hydrolase activity, hydrolyzing O-glycosyl compounds:GO:0004553;;carbohydrate metabolic process:GO:0005975;;extracellular region:GO:0005576
estExt_Genemark1.C_2_t10124	estExt_Genemark1.C_2_t10124	estExt_Genemark1.C_2_t10124	scaffold_2:415654-417264	0.403148	476.61	10.2073	0	yes	23616	IPR017853:Glycoside hydrolase, catalytic core;;IPR001000:Glycoside hydrolase, family 10	sp|P23360|XYNA_THEAU Endo-1,4-beta-xylanase OS=Thermoascus aurantiacus GN=XYNA PE=1 SV=4:420.239	-	-	hydrolase activity, hydrolyzing O-glycosyl compounds:GO:0004553;;carbohydrate metabolic process:GO:0005975	01.05.03 polysaccharide metabolism	16.05 polysaccharide binding
estExt_fgenesh2_kg.C_40049	estExt_fgenesh2_kg.C_40049	estExt_fgenesh2_kg.C_40049	scaffold_4:810379-811560	1.60882	1683.48	10.0312	0	yes	122518	IPR008957:Fibronectin, type III-like fold;;IPR005103:Glycoside hydrolase, family 61	sp|Q7Z9M7|GUN7_TRIRE Endoglucanase-7 OS=Trichoderma reesei GN=cel61b PE=1 SV=1:509.99	-	-	-	01.05.02.07 sugar, glucoside, polyol and carboxylate catabolism N.crassa	01.05.03 polysaccharide metabolism	01.25.01 extracellular polysaccharide degradation N.crassa
estExt_fgenesh2_kg.C_1_t10058	estExt_fgenesh2_kg.C_1_t10058	estExt_fgenesh2_kg.C_1_t10058	scaffold_1:519729-520907	2.31651	1426.88	9.2667	0	yes	121449	IPR000254:Cellulose-binding region, fungal	sp|P19355|GUX1_TRIVI Exoglucanase 1 OS=Trichoderma viride GN=cbh1 PE=3 SV=2:85.8853	-	-	cellulose binding:GO:0030248;;hydrolase activity, hydrolyzing O-glycosyl compounds:GO:0004553;;carbohydrate metabolic process:GO:0005975;;extracellular region:GO:0005576
estExt_fgenesh2_kg.C_260030	estExt_fgenesh2_kg.C_260030	estExt_fgenesh2_kg.C_260030	scaffold_26:300331-301211	6.25189	3589.63	9.16533	0	yes	124931	IPR001137:Glycoside hydrolase, family 11;;IPR008985:Concanavalin A-like lectin/glucanase	sp|P36217|XYN2_TRIRE Endo-1,4-beta-xylanase 2 OS=Trichoderma reesei GN=xyn2 PE=1 SV=1:422.55	-	-	hydrolase activity, hydrolyzing O-glycosyl compounds:GO:0004553;;carbohydrate metabolic process:GO:0005975	01.05 C-compound and carbohydrate metabolism	01.05.02.07 sugar, glucoside, polyol and carboxylate catabolism N.crassa	32.10.07 degradation / modification of foreign (exogenous) polysaccharides N.crassa
e_gw1.54.21.1	e_gw1.54.21.1	e_gw1.54.21.1	scaffold_54:26168-27626	0.281664	153.901	9.09382	0	yes	93498	IPR017853:Glycoside hydrolase, catalytic core;;IPR001139:Glycoside hydrolase, family 30	sp|Q45070|XYNC1_BACSU Glucuronoxylanase xynC OS=Bacillus subtilis GN=xynC PE=1 SV=1:63.5438	3.2.1.45:Glucosylceramidase.	KOG2566:Beta-glucocerebrosidase	lysosome:GO:0005764;;lysosome organization and biogenesis:GO:0007040;;sphingolipid metabolic process:GO:0006665;;glucosylceramidase activity:GO:0004348
estExt_fgenesh1_pg.C_50028	estExt_fgenesh1_pg.C_50028	estExt_fgenesh1_pg.C_50028	scaffold_5:98718-101150	2.83143	1517.14	9.06561	0	yes	140746	IPR001764:Glycoside hydrolase, family 3, N-terminal;;IPR002772:Glycoside hydrolase, family 3, C-terminal;;IPR017853:Glycoside hydrolase, catalytic core	sp|Q4WRB0|XYND_ASPFU Probable exo-1,4-beta-xylosidase xlnD OS=Neosartorya fumigata (strain ATCC MYA-4609 / Af293 / CBS 101355 / FGSC A1100) GN=xlnD PE=2 SV=1:1124	3.2.1.21:Beta-glucosidase.	-	hydrolase activity, hydrolyzing O-glycosyl compounds:GO:0004553;;carbohydrate metabolic process:GO:0005975;;beta-glucosidase activity:GO:0008422	01.05 C-compound and carbohydrate metabolism	01.05.03 polysaccharide metabolism	42.01 cell wall
fgenesh2_kg.4_#_2_#_AAP57750.1	fgenesh2_kg.4_#_2_#_AAP57750.1	fgenesh2_kg.4_#_2_#_AAP57750.1	scaffold_4:59251-60220	0.146859	70.0139	8.89707	3.55e-08	yes	118070	IPR005193:Glycoside hydrolase, family 62	sp|Q2U7D2|AXHA_ASPOR Probable alpha-L-arabinofuranosidase axhA OS=Aspergillus oryzae (strain ATCC 42149 / RIB 40) GN=axhA PE=3 SV=1:480.715	-	-	-
e_gw1.3.1006.1	e_gw1.3.1006.1	e_gw1.3.1006.1	scaffold_3:1861288-1862724	3.15747	1382.16	8.77394	0	yes	72489	IPR017853:Glycoside hydrolase, catalytic core;;IPR001547:Glycoside hydrolase, family 5;;IPR000254:Cellulose-binding region, fungal	sp|P07982|GUN2_TRIRE Endoglucanase EG-II OS=Trichoderma reesei GN=egl2 PE=1 SV=1:845.884	-	-	cellulose binding:GO:0030248;;hydrolase activity, hydrolyzing O-glycosyl compounds:GO:0004553;;carbohydrate metabolic process:GO:0005975;;extracellular region:GO:0005576
gm1.860_g	gm1.860_g	gm1.860_g	scaffold_1:3108857-3110364	1.03277	399.161	8.59431	0	yes	5304	IPR001722:Glycoside hydrolase, family 7;;IPR000254:Cellulose-binding region, fungal;;IPR008985:Concanavalin A-like lectin/glucanase	sp|P07981|GUN1_TRIRE Endoglucanase EG-1 OS=Trichoderma reesei GN=egl1 PE=1 SV=1:934.48	-	-	cellulose binding:GO:0030248;;hydrolase activity, hydrolyzing O-glycosyl compounds:GO:0004553;;carbohydrate metabolic process:GO:0005975;;extracellular region:GO:0005576	01.05.03 polysaccharide metabolism
fgenesh1_pm.33_#_16	fgenesh1_pm.33_#_16	fgenesh1_pm.33_#_16	scaffold_33:37305-39735	0.207384	71.828	8.4361	0	yes	134448	IPR017853:Glycoside hydrolase, catalytic core;;IPR000322:Glycoside hydrolase, family 31	sp|P31434|XYLS_ECOLI Alpha-xylosidase OS=Escherichia coli (strain K12) GN=yicI PE=1 SV=2:665.996	3.2.1.20:Alpha-glucosidase.	KOG1065:Maltase glucoamylase and related hydrolases, glycosyl hydrolase family 31	hydrolase activity, hydrolyzing O-glycosyl compounds:GO:0004553;;carbohydrate metabolic process:GO:0005975;;alpha-glucosidase activity:GO:0004558
estExt_fgenesh2_kg.C_190032	estExt_fgenesh2_kg.C_190032	estExt_fgenesh2_kg.C_190032	scaffold_19:256723-257402	1.67384	352.743	7.71931	0	yes	124438	IPR002594:Glycoside hydrolase, family 12;;IPR008985:Concanavalin A-like lectin/glucanase	sp|P22669|GUN_ASPAC Endoglucanase-1 OS=Aspergillus aculeatus PE=1 SV=1:214.927	-	-	polysaccharide catabolic process:GO:0000272;;cellulase activity:GO:0008810
estExt_fgenesh2_kg.C_30202	estExt_fgenesh2_kg.C_30202	estExt_fgenesh2_kg.C_30202	scaffold_3:1882163-1884078	13.0161	2516.11	7.59476	0	yes	122470	IPR001524:Glycoside hydrolase, family 6;;IPR016288:1, 4-beta cellobiohydrolase;;IPR000254:Cellulose-binding region, fungal	sp|P07987|GUX2_TRIRE Exoglucanase 2 OS=Trichoderma reesei GN=cbh2 PE=1 SV=1:959.518	-	-	cellulose binding:GO:0030248;;hydrolase activity, hydrolyzing O-glycosyl compounds:GO:0004553;;carbohydrate metabolic process:GO:0005975;;extracellular region:GO:0005576	01.05 C-compound and carbohydrate metabolism	01.05.02.07 sugar, glucoside, polyol and carboxylate catabolism N.crassa	01.05.03 polysaccharide metabolism
e_gw1.30.20.1	e_gw1.30.20.1	e_gw1.30.20.1	scaffold_30:31290-32879	6.56238	1238.87	7.56059	0	yes	90847	IPR017853:Glycoside hydrolase, catalytic core;;IPR001139:Glycoside hydrolase, family 30	sp|Q45070|XYNC1_BACSU Glucuronoxylanase xynC OS=Bacillus subtilis GN=xynC PE=1 SV=1:68.5514	3.2.1.45:Glucosylceramidase.	KOG2566:Beta-glucocerebrosidase	lysosome:GO:0005764;;lysosome organization and biogenesis:GO:0007040;;sphingolipid metabolic process:GO:0006665;;glucosylceramidase activity:GO:0004348
e_gw1.28.118.1	e_gw1.28.118.1	e_gw1.28.118.1	scaffold_28:174334-176878	1.5791	276.298	7.45097	0	yes	90302	IPR005154:Glycoside hydrolase family 67;;IPR017853:Glycoside hydrolase, catalytic core;;IPR011100:Glycosyl hydrolase 67 middle;;IPR011395:Alpha-glucuronidase;;IPR011099:Glycosyl hydrolase 67, C-terminal	sp|Q99024|AGUA_TRIRE Alpha-glucuronidase OS=Trichoderma reesei PE=1 SV=1:1746.1	-	-	alpha-glucuronidase activity:GO:0046559;;xylan catabolic process:GO:0045493;;extracellular region:GO:0005576	01.05.03 polysaccharide metabolism	01.25.01 extracellular polysaccharide degradation N.crassa
estExt_fgenesh2_kg.C_300009	estExt_fgenesh2_kg.C_300009	estExt_fgenesh2_kg.C_300009	scaffold_30:45338-47357	17.5331	3014.4	7.42565	0	yes	125125	IPR001722:Glycoside hydrolase, family 7;;IPR000254:Cellulose-binding region, fungal;;IPR008985:Concanavalin A-like lectin/glucanase	sp|P62694|GUX1_TRIRE Exoglucanase 1 OS=Trichoderma reesei GN=cbh1 PE=1 SV=1:991.875	-	KOG4562:Uncharacterized conserved protein (tumor-rejection antigen MAGE in humans)	cellulose binding:GO:0030248;;hydrolase activity, hydrolyzing O-glycosyl compounds:GO:0004553;;carbohydrate metabolic process:GO:0005975;;extracellular region:GO:0005576	01.05.03 polysaccharide metabolism
estExt_fgenesh1_pg.C_1_t10124	estExt_fgenesh1_pg.C_1_t10124	estExt_fgenesh1_pg.C_1_t10124	scaffold_1:521457-522808	9.21503	1231.67	7.06242	0	yes	139633	IPR000254:Cellulose-binding region, fungal;;IPR005103:Glycoside hydrolase, family 61	sp|O14405|GUN4_TRIRE Endoglucanase-4 OS=Trichoderma reesei GN=cel61a PE=1 SV=1:691.804	-	KOG4157:beta-1,6-N-acetylglucosaminyltransferase, contains WSC domain	cellulose binding:GO:0030248;;hydrolase activity, hydrolyzing O-glycosyl compounds:GO:0004553;;carbohydrate metabolic process:GO:0005975;;extracellular region:GO:0005576	01.05.03 polysaccharide metabolism	01.25.01 extracellular polysaccharide degradation N.crassa
estExt_Genewise1.C_11_t20268	estExt_Genewise1.C_11_t20268	estExt_Genewise1.C_11_t20268	scaffold_11:969946-972791	2.72235	346.077	6.99009	0	yes	111943	IPR002860:BNR repeat;;IPR000254:Cellulose-binding region, fungal	sp|Q7Z9M8|XG74_TRIRE Xyloglucanase OS=Trichoderma reesei GN=cel74a PE=1 SV=1:1662.51	-	KOG3599:Ca2+-modulated nonselective cation channel polycystin	cellulose binding:GO:0030248;;hydrolase activity, hydrolyzing O-glycosyl compounds:GO:0004553;;carbohydrate metabolic process:GO:0005975;;extracellular region:GO:0005576	01.05.03 polysaccharide metabolism	01.25.01 extracellular polysaccharide degradation N.crassa	32.10.07 degradation / modification of foreign (exogenous) polysaccharides N.crassa	16.05 polysaccharide binding
e_gw1.34.52.1	e_gw1.34.52.1	e_gw1.34.52.1	scaffold_34:81952-83373	0.616928	55.6261	6.49452	0	yes	91667	IPR011050:Pectin lyase fold/virulence factor;;IPR000743:Glycoside hydrolase, family 28	sp|Q0CGP0|PGLRX_ASPTN Probable exopolygalacturonase X OS=Aspergillus terreus (strain NIH 2624 / FGSC A1156) GN=pgaX PE=3 SV=1:456.062	-	-	carbohydrate metabolic process:GO:0005975;;polygalacturonase activity:GO:0004650	01.05.03 polysaccharide metabolism
fgenesh1_pm.24_#_4	fgenesh1_pm.24_#_4	fgenesh1_pm.24_#_4	scaffold_24:9242-10623	0.118939	9.66699	6.34477	0.000212701	yes	133383	IPR011050:Pectin lyase fold/virulence factor;;IPR006626:Parallel beta-helix repeat;;IPR000743:Glycoside hydrolase, family 28	sp|A1D145|PGLR_NEOFI Probable endopolygalacturonase NFIA_008150 OS=Neosartorya fischeri (strain ATCC 1020 / DSM 3700 / FGSC A1164 / NRRL 181) GN=NFIA_008150 PE=3 SV=1:543.117	3.2.1.15:Polygalacturonase.	-	carbohydrate metabolic process:GO:0005975;;polygalacturonase activity:GO:0004650	01.05.02.04 sugar, glucoside, polyol and carboxylate anabolism S.cerevisiae	01.05.02.07 sugar, glucoside, polyol and carboxylate catabolism S.cerevisiae	01.05.03 polysaccharide metabolism	32.10.07 degradation / modification of foreign (exogenous) polysaccharides N.crassa	43.01.03.05 budding, cell polarity and filament formation S.cerevisiae
estExt_fgenesh1_pm.C_50031	estExt_fgenesh1_pm.C_50031	estExt_fgenesh1_pm.C_50031	scaffold_5:102432-104802	0.590036	43.8745	6.21643	0	yes	136547	IPR001764:Glycoside hydrolase, family 3, N-terminal;;IPR002772:Glycoside hydrolase, family 3, C-terminal;;IPR017853:Glycoside hydrolase, catalytic core	sp|B0YB65|BGLL_ASPFC Probable beta-glucosidase L OS=Neosartorya fumigata (strain CEA10 / CBS 144.89 / FGSC A1163) GN=bglL PE=3 SV=1:879.782	3.2.1.21:Beta-glucosidase.	-	hydrolase activity, hydrolyzing O-glycosyl compounds:GO:0004553;;carbohydrate metabolic process:GO:0005975;;beta-glucosidase activity:GO:0008422	01.05.02.07 sugar, glucoside, polyol and carboxylate catabolism N.crassa	01.05.03 polysaccharide metabolism
fgenesh1_pg.24_#_2	fgenesh1_pg.24_#_2	fgenesh1_pg.24_#_2	scaffold_24:3260-4012	0.238016	13.8707	5.86484	0.000723824	yes	38418	IPR001137:Glycoside hydrolase, family 11;;IPR008985:Concanavalin A-like lectin/glucanase	sp|P36218|XYN1_TRIRE Endo-1,4-beta-xylanase 1 OS=Trichoderma reesei GN=xyn1 PE=1 SV=1:464.922	-	-	hydrolase activity, hydrolyzing O-glycosyl compounds:GO:0004553;;carbohydrate metabolic process:GO:0005975	01.05 C-compound and carbohydrate metabolism	01.05.02.07 sugar, glucoside, polyol and carboxylate catabolism N.crassa	32.10.07 degradation / modification of foreign (exogenous) polysaccharides N.crassa
estExt_Genemark1.C_170165	estExt_Genemark1.C_170165	estExt_Genemark1.C_170165	scaffold_17:633215-634193	2.60733	112.369	5.42953	0	yes	25940	IPR000254:Cellulose-binding region, fungal;;IPR009009:Barwin-related endoglucanase;;IPR007112:Expansin 45, endoglucanase-like;;IPR000334:Glycoside hydrolase, family 45	sp|P43317|GUN5_TRIRE Endoglucanase-5 OS=Trichoderma reesei GN=egl5 PE=3 SV=1:478.789	-	-	cellulose binding:GO:0030248;;hydrolase activity, hydrolyzing O-glycosyl compounds:GO:0004553;;carbohydrate metabolic process:GO:0005975;;cellulase activity:GO:0008810;;extracellular region:GO:0005576
estExt_Genewise1Plus.C_300040	estExt_Genewise1Plus.C_300040	estExt_Genewise1Plus.C_300040	scaffold_30:34984-36773	44.8105	1748.14	5.28584	0	yes	104220	IPR007117:Pollen allergen/expansin, C-terminal;;IPR000254:Cellulose-binding region, fungal;;IPR009009:Barwin-related endoglucanase;;IPR007112:Expansin 45, endoglucanase-like	sp|Q40638|EXPB1_ORYSJ Expansin-B1 OS=Oryza sativa subsp. japonica GN=EXPB1a PE=1 SV=2:64.6994	-	KOG4157:beta-1,6-N-acetylglucosaminyltransferase, contains WSC domain	cellulose binding:GO:0030248;;hydrolase activity, hydrolyzing O-glycosyl compounds:GO:0004553;;carbohydrate metabolic process:GO:0005975;;extracellular region:GO:0005576
e_gw1.1.629.1	e_gw1.1.629.1	e_gw1.1.629.1	scaffold_1:2701281-2703846	5.29283	134.346	4.66577	0	yes	67432	IPR017853:Glycoside hydrolase, catalytic core;;IPR006102:Glycoside hydrolase family 2, immunoglobulin-like beta-sandwich;;IPR008979:Galactose-binding like;;IPR006104:Glycoside hydrolase family 2, carbohydrate-binding	sp|Q0CCA0|MANBB_ASPTN Probable beta-mannosidase B OS=Aspergillus terreus (strain NIH 2624 / FGSC A1156) GN=mndB PE=3 SV=2:790.801	3.2.1.25:Beta-mannosidase.	KOG2230:Predicted beta-mannosidase	hydrolase activity, hydrolyzing O-glycosyl compounds:GO:0004553;;carbohydrate metabolic process:GO:0005975;;beta-mannosidase activity:GO:0004567	01.05.03 polysaccharide metabolism
estExt_Genewise1Plus.C_1_t20271	estExt_Genewise1Plus.C_1_t20271	estExt_Genewise1Plus.C_1_t20271	scaffold_1:977340-978712	0.347169	7.59448	4.45124	1.6e-05	yes	94061	IPR017853:Glycoside hydrolase, catalytic core;;IPR001223:Glycoside hydrolase, family 18, catalytic domain;;IPR001579:Glycoside hydrolase, chitinase active site	sp|P29025|CHI1_RHINI Chitinase 1 OS=Rhizopus niveus GN=CHI1 PE=3 SV=1:206.453	3.2.1.14:Chitinase.	KOG4701:Chitinase	endochitinase activity:GO:0008843;;hydrolase activity, hydrolyzing O-glycosyl compounds:GO:0004553;;carbohydrate metabolic process:GO:0005975;;chitinase activity:GO:0004568	01.05.03 polysaccharide metabolism
estExt_Genewise1.C_12_t20163	estExt_Genewise1.C_12_t20163	estExt_Genewise1.C_12_t20163	scaffold_12:871963-873896	10.652	223.23	4.38933	0	yes	112243	IPR005198:Glycoside hydrolase, family 76;;IPR008928:Six-hairpin glycosidase-like;;IPR014480:Mannan endo-1,6-alpha-mannosidase	sp|P36091|DCW1_YEAST Mannan endo-1,6-alpha-mannosidase DCW1 OS=Saccharomyces cerevisiae (strain ATCC 204508 / S288c) GN=DCW1 PE=1 SV=1:340.117	3.2.1.101:Mannan endo-1,6-beta-mannosidase.	-	mannan endo-1,6-alpha-mannosidase activity:GO:0008496;;catalytic activity:GO:0003824	40.01 cell growth / morphogenesis	40.01.03 directional cell growth (morphogenesis) N.crassa	42.01 cell wall	42.04 cytoskeleton/structural proteins	43.01.03 fungal and other eukaryotic cell type differentiation N.crassa	43.01.03.05 budding, cell polarity and filament formation N.crassa
estExt_Genemark1.C_2_t10292	estExt_Genemark1.C_2_t10292	estExt_Genemark1.C_2_t10292	scaffold_2:1070109-1071457	9.85328	139.663	3.8252	0	yes	23689	IPR005198:Glycoside hydrolase, family 76;;IPR008928:Six-hairpin glycosidase-like;;IPR016130:Protein-tyrosine phosphatase, active site	sp|Q9P6I3|YHG7_SCHPO Putative mannan endo-1,6-alpha-mannosidase C1198.07c OS=Schizosaccharomyces pombe (strain ATCC 38366 / 972) GN=SPBC1198.07c PE=2 SV=1:78.5666	-	-	dephosphorylation:GO:0016311;;phosphoric monoester hydrolase activity:GO:0016791;;catalytic activity:GO:0003824;;protein tyrosine phosphatase activity:GO:0004725	01.05.03 polysaccharide metabolism
estExt_Genewise1Plus.C_1_t50314	estExt_Genewise1Plus.C_1_t50314	estExt_Genewise1Plus.C_1_t50314	scaffold_1:2952734-2954260	70.553	857.993	3.60419	0	yes	94809	IPR001395:Aldo/keto reductase	sp|Q876L8|XYL1_TRIRE NAD(P)H-dependent D-xylose reductase xyl1 OS=Trichoderma reesei GN=xyl1 PE=3 SV=1:676.011	1.1.1.179:D-xylose 1-dehydrogenase (NADP+).	KOG1577:Aldo/keto reductase family proteins	oxidoreductase activity:GO:0016491;;D-xylose 1-dehydrogenase (NADP+) activity:GO:0047837	01.05 C-compound and carbohydrate metabolism	01.05.02 sugar, glucoside, polyol and carboxylate metabolism	01.05.02.07 sugar, glucoside, polyol and carboxylate catabolism S.cerevisiae	01.05.03 polysaccharide metabolism	01.06 lipid, fatty acid and isoprenoid metabolism	01.06.06 isoprenoid metabolism	01.06.06.11 tetracyclic and pentacyclic triterpenes (cholesterin, steroids and hopanoids) metabolism	01.07 metabolism of vitamins, cofactors, and prosthetic groups	01.20 secondary metabolism	01.20.17.09 metabolism of alkaloids	02.16 fermentation	32.01.03 osmotic and salt stress response	32.01.05 heat shock response	32.10 degradation / modification of foreign (exogenous) compounds	34.11.03.13 osmosensing	16.21.07 NAD/NADP binding
estExt_fgenesh1_pg.C_170090	estExt_fgenesh1_pg.C_170090	estExt_fgenesh1_pg.C_170090	scaffold_17:362689-363901	3.74422	42.8737	3.51735	1.03e-13	yes	142298	IPR017853:Glycoside hydrolase, catalytic core	sp|P29026|CHI1_RHIOL Chitinase 1 OS=Rhizopus oligosporus GN=CHI1 PE=1 SV=1:52.373	-	-	-	01.05 C-compound and carbohydrate metabolism	42.01 cell wall
e_gw1.7.292.1	e_gw1.7.292.1	e_gw1.7.292.1	scaffold_7:766335-767997	1.80629	20.1482	3.47955	5.75e-12	yes	77521	IPR006710:Glycoside hydrolase, family 43	sp|P94489|XYNB_BACSU Beta-xylosidase OS=Bacillus subtilis GN=xynB PE=1 SV=2:446.047	-	-	hydrolase activity, hydrolyzing O-glycosyl compounds:GO:0004553;;carbohydrate metabolic process:GO:0005975	01.05.02.07 sugar, glucoside, polyol and carboxylate catabolism B.subtilis	01.05.03 polysaccharide metabolism
estExt_fgenesh2_kg.C_410009	estExt_fgenesh2_kg.C_410009	estExt_fgenesh2_kg.C_410009	scaffold_41:41159-42459	2.22661	22.8757	3.3609	1.79e-07	yes	125426	-	sp|P22222|E13B_CELCE Glucan endo-1,3-beta-glucosidase OS=Cellulosimicrobium cellulans PE=1 SV=1:84.3445	-	-	-	01.05 C-compound and carbohydrate metabolism
gm1.8581_g	gm1.8581_g	gm1.8581_g	scaffold_39:129989-130831	0.915409	8.85783	3.27447	0.000490878	yes	13025	IPR009939:Fungal chitosanase	-	-	-	-	01.05.03 polysaccharide metabolism
gm1.7136_g	gm1.7136_g	gm1.7136_g	scaffold_22:428207-429647	1.42706	12.2129	3.09729	6.72e-08	yes	11580	IPR017853:Glycoside hydrolase, catalytic core;;IPR001680:WD40 repeat	sp|Q76FP5|6GAL_TRIVI Endo-beta-1,6-galactanase OS=Trichoderma viride GN=6GAL PE=1 SV=1:896.73	-	-	-
estExt_fgenesh2_kg.C_210002	estExt_fgenesh2_kg.C_210002	estExt_fgenesh2_kg.C_210002	scaffold_21:33761-35454	5.88909	45.1488	2.93857	1.47e-11	yes	124526	IPR015821:Glycoside hydrolase, family 18, N-terminal;;IPR017853:Glycoside hydrolase, catalytic core;;IPR001223:Glycoside hydrolase, family 18, catalytic domain;;IPR001579:Glycoside hydrolase, chitinase active site;;IPR011583:Chitinase II	sp|P48827|CHI4_TRIHA 42 kDa endochitinase OS=Trichoderma harzianum GN=chit42 PE=1 SV=1:707.597	3.2.1.14:Chitinase.	KOG2806:Chitinase	endochitinase activity:GO:0008843;;hydrolase activity, hydrolyzing O-glycosyl compounds:GO:0004553;;carbohydrate metabolic process:GO:0005975;;chitin catabolic process:GO:0006032;;chitinase activity:GO:0004568	01.05.03 polysaccharide metabolism	01.05.09.07 aminosaccharide catabolism
estExt_Genewise1Plus.C_15_t10124	estExt_Genewise1Plus.C_15_t10124	estExt_Genewise1Plus.C_15_t10124	scaffold_15:197136-200659	8.19902	59.2901	2.85427	2.35e-13	yes	101346	IPR001944:Glycoside hydrolase, family 35;;IPR017853:Glycoside hydrolase, catalytic core	sp|A1D1Z9|BGALA_NEOFI Probable beta-galactosidase A OS=Neosartorya fischeri (strain ATCC 1020 / DSM 3700 / FGSC A1164 / NRRL 181) GN=lacA PE=3 SV=1:1201.04	3.2.1.23:Beta-galactosidase.	KOG0496:Beta-galactosidase	beta-galactosidase activity:GO:0004565;;carbohydrate metabolic process:GO:0005975;;beta-galactosidase complex:GO:0009341	01.05 C-compound and carbohydrate metabolism
estExt_Genemark1.C_140071	estExt_Genemark1.C_140071	estExt_Genemark1.C_140071	scaffold_14:253869-256407	4.90231	35.0534	2.83802	7.68e-12	yes	25615	IPR005887:Alpha-1,2-mannosidase, putative;;IPR012939:Glycosyl hydrolase 92	-	-	-	-
estExt_Genewise1.C_6_t20284	estExt_Genewise1.C_6_t20284	estExt_Genewise1.C_6_t20284	scaffold_6:869248-872363	6.82641	47.1733	2.78877	6.48e-12	yes	109567	IPR001764:Glycoside hydrolase, family 3, N-terminal;;IPR002772:Glycoside hydrolase, family 3, C-terminal;;IPR017853:Glycoside hydrolase, catalytic core	sp|Q4WMU3|BGLF_ASPFU Probable beta-glucosidase F OS=Neosartorya fumigata (strain ATCC MYA-4609 / Af293 / CBS 101355 / FGSC A1100) GN=bglF PE=3 SV=2:1031.17	3.2.1.21:Beta-glucosidase.	-	hydrolase activity, hydrolyzing O-glycosyl compounds:GO:0004553;;carbohydrate metabolic process:GO:0005975;;beta-glucosidase activity:GO:0008422	01.05.02.07 sugar, glucoside, polyol and carboxylate catabolism N.crassa	01.05.03 polysaccharide metabolism
estExt_Genewise1Plus.C_19_t20059	estExt_Genewise1Plus.C_19_t20059	estExt_Genewise1Plus.C_19_t20059	scaffold_19:641551-643289	1.78606	10.3764	2.53846	8.04e-06	yes	102517	IPR015289:Alpha-L-arabinofuranosidase B, catalytic;;IPR007934:Alpha-L-arabinofuranosidase B;;IPR008985:Concanavalin A-like lectin/glucanase	sp|Q92455|ABF1_TRIRE Alpha-N-arabinofuranosidase OS=Trichoderma reesei GN=abf1 PE=2 SV=1:1010.36	-	-	alpha-N-arabinofuranosidase activity:GO:0046556;;L-arabinose metabolic process:GO:0046373	01.05 C-compound and carbohydrate metabolism
estExt_Genemark1.C_100031	estExt_Genemark1.C_100031	estExt_Genemark1.C_100031	scaffold_10:95265-100101	9.11447	51.0358	2.48528	7.09e-10	yes	25104	IPR011050:Pectin lyase fold/virulence factor	sp|P49426|EXG1_COCCA Glucan 1,3-beta-glucosidase OS=Cochliobolus carbonum GN=EXG1 PE=1 SV=1:548.51	-	-	-	01.05.03 polysaccharide metabolism	01.25.01 extracellular polysaccharide degradation N.crassa	32.05.05 virulence, disease factors	32.10.07 degradation / modification of foreign (exogenous) polysaccharides N.crassa	42.27 extracellular / secretion proteins
e_gw1.1.2325.1	e_gw1.1.2325.1	e_gw1.1.2325.1	scaffold_1:2750746-2752665	2.80498	15.3502	2.45219	1.03e-06	yes	70100	IPR005198:Glycoside hydrolase, family 76;;IPR008928:Six-hairpin glycosidase-like	sp|P36091|DCW1_YEAST Mannan endo-1,6-alpha-mannosidase DCW1 OS=Saccharomyces cerevisiae (strain ATCC 204508 / S288c) GN=DCW1 PE=1 SV=1:55.4546	-	-	catalytic activity:GO:0003824
estExt_fgenesh2_kg.C_50002	estExt_fgenesh2_kg.C_50002	estExt_fgenesh2_kg.C_50002	scaffold_5:11116-13451	6.13	30.1011	2.29586	6.23e-08	yes	122639	IPR001764:Glycoside hydrolase, family 3, N-terminal;;IPR002772:Glycoside hydrolase, family 3, C-terminal;;IPR017853:Glycoside hydrolase, catalytic core;;IPR011658:PA14	sp|Q5B6C7|BGLH_EMENI Probable beta-glucosidase H OS=Emericella nidulans GN=bglH PE=3 SV=2:1036.56	3.2.1.21:Beta-glucosidase.	-	hydrolase activity, hydrolyzing O-glycosyl compounds:GO:0004553;;carbohydrate metabolic process:GO:0005975;;beta-glucosidase activity:GO:0008422	01.05.03 polysaccharide metabolism
estExt_fgenesh2_kg.C_180072	estExt_fgenesh2_kg.C_180072	estExt_fgenesh2_kg.C_180072	scaffold_18:526659-527796	19.9387	95.7557	2.26379	2.48e-08	yes	124397	IPR007577:Glycosyltransferase sugar-binding region containing DXD motif	sp|Q9UTR6|OCH1_SCHPO Initiation-specific alpha-1,6-mannosyltransferase OS=Schizosaccharomyces pombe (strain ATCC 38366 / 972) GN=och1 PE=1 SV=2:144.05	-	-	glycolipid 6-alpha-mannosyltransferase activity:GO:0033164
estExt_Genewise1Plus.C_14_t10298	estExt_Genewise1Plus.C_14_t10298	estExt_Genewise1Plus.C_14_t10298	scaffold_14:372947-375737	15.3286	69.0354	2.17111	2.02e-08	yes	101105	IPR001382:Glycoside hydrolase, family 47	sp|Q8H116|MNS2_ARATH Mannosyl-oligosaccharide 1,2-alpha-mannosidase MNS2 OS=Arabidopsis thaliana GN=MNS2 PE=1 SV=1:241.891	3.2.1.113:Mannosyl-oligosaccharide 1,2-alpha-mannosidase.	KOG2204:Mannosyl-oligosaccharide alpha-1,2-mannosidase and related glycosyl hydrolases	calcium ion binding:GO:0005509;;membrane:GO:0016020;;mannosyl-oligosaccharide 1,2-alpha-mannosidase activity:GO:0004571	01.05 C-compound and carbohydrate metabolism	01.05.03 polysaccharide metabolism	14.07.02 modification with sugar residues (e.g. glycosylation, deglycosylation) N.crassa
estExt_Genemark1.C_100013	estExt_Genemark1.C_100013	estExt_Genemark1.C_100013	scaffold_10:38894-42171	21.2884	79.1524	1.89456	2.45e-07	yes	25095	IPR001764:Glycoside hydrolase, family 3, N-terminal;;IPR002772:Glycoside hydrolase, family 3, C-terminal;;IPR017853:Glycoside hydrolase, catalytic core	sp|Q0CTD7|BGLA_ASPTN Probable beta-glucosidase A OS=Aspergillus terreus (strain NIH 2624 / FGSC A1156) GN=bglA PE=3 SV=1:996.112	3.2.1.21:Beta-glucosidase.	-	hydrolase activity, hydrolyzing O-glycosyl compounds:GO:0004553;;carbohydrate metabolic process:GO:0005975;;beta-glucosidase activity:GO:0008422	01.05.02.07 sugar, glucoside, polyol and carboxylate catabolism N.crassa	01.05.03 polysaccharide metabolism
estExt_Genemark1.C_200159	estExt_Genemark1.C_200159	estExt_Genemark1.C_200159	scaffold_20:589338-591355	25.2409	88.3368	1.80725	1.87e-06	yes	26187	IPR000577:Carbohydrate kinase, FGGY	sp|A1DEK3|XKS1_NEOFI Probable D-xylulose kinase A OS=Neosartorya fischeri (strain ATCC 1020 / DSM 3700 / FGSC A1164 / NRRL 181) GN=xkiA PE=2 SV=1:686.797	2.7.1.17:Xylulokinase.	KOG2531:Sugar (pentulose and hexulose) kinases	xylulokinase activity:GO:0004856;;carbohydrate metabolic process:GO:0005975	01.04 phosphate metabolism	01.05 C-compound and carbohydrate metabolism	01.05.02.07 sugar, glucoside, polyol and carboxylate catabolism S.cerevisiae	16.19.03 ATP binding
estExt_fgenesh2_kg.C_30017	estExt_fgenesh2_kg.C_30017	estExt_fgenesh2_kg.C_30017	scaffold_3:68192-70550	9.98787	31.5182	1.65794	0.000127653	yes	122299	IPR001382:Glycoside hydrolase, family 47	sp|Q12563|MNS1B_ASPSA Mannosyl-oligosaccharide alpha-1,2-mannosidase 1B OS=Aspergillus saitoi GN=mns1B PE=2 SV=1:527.709	3.2.1.113:Mannosyl-oligosaccharide 1,2-alpha-mannosidase.	KOG2431:1, 2-alpha-mannosidase	calcium ion binding:GO:0005509;;membrane:GO:0016020;;mannosyl-oligosaccharide 1,2-alpha-mannosidase activity:GO:0004571	01.05 C-compound and carbohydrate metabolism	14.07.02 modification with sugar residues (e.g. glycosylation, deglycosylation) N.crassa	14.07.02.02 N-directed glycosylation, deglycosylation S.cerevisiae
estExt_Genewise1Plus.C_13_t10407	estExt_Genewise1Plus.C_13_t10407	estExt_Genewise1Plus.C_13_t10407	scaffold_13:545031-547841	5.06406	15.1528	1.58122	0.00101452	yes	100837	IPR005200:Glycoside hydrolase, family 81	sp|Q09850|ENG2_SCHPO Putative endo-1,3(4)-beta-glucanase 2 OS=Schizosaccharomyces pombe (strain ATCC 38366 / 972) GN=eng2 PE=2 SV=1:521.546	-	KOG2254:Predicted endo-1,3-beta-glucanase	-	01.05 C-compound and carbohydrate metabolism	01.05.03 polysaccharide metabolism	14.10 assembly of protein complexes	40.01 cell growth / morphogenesis	42.04.03 actin cytoskeleton	43.01.03.05 budding, cell polarity and filament formation S.cerevisiae
e_gw1.7.911.1	e_gw1.7.911.1	e_gw1.7.911.1	scaffold_7:973867-975598	132.399	388.592	1.55336	8.98e-05	yes	77989	IPR017853:Glycoside hydrolase, catalytic core;;IPR001360:Glycoside hydrolase, family 1	sp|Q25BW4|BGL1B_PHACH Beta-glucosidase 1B OS=Phanerochaete chrysosporium GN=BGL1B PE=1 SV=1:495.738	3.2.1.-:Glycosidases, i.e. enzymes hydrolyzing O- and S-glycosyl	KOG0626:Beta-glucosidase, lactase phlorizinhydrolase, and related proteins	hydrolase activity, hydrolyzing O-glycosyl compounds:GO:0004553;;carbohydrate metabolic process:GO:0005975;;glucosidase activity:GO:0015926;;mannosyl-oligosaccharide mannosidase activity:GO:0015924;;galactosidase activity:GO:0015925;;lytic transglycosylase activity:GO:0008933;;amylase activity:GO:0016160;;hexosaminidase activity:GO:0015929;;fucosidase activity:GO:0015928;;trehalase activity:GO:00…	01.05 C-compound and carbohydrate metabolism	01.05.02.04 sugar, glucoside, polyol and carboxylate anabolism L.innocua	01.05.02.07 sugar, glucoside, polyol and carboxylate catabolism N.crassa	01.05.03 polysaccharide metabolism	01.20.01.07 metabolism of glycosides	02.01 glycolysis and gluconeogenesis	32.05.03 defense related proteins
e_gw1.4.1135.1	e_gw1.4.1135.1	e_gw1.4.1135.1	scaffold_4:131898-134523	35.2541	74.2541	1.07468	0.00486683	yes	74305	IPR001764:Glycoside hydrolase, family 3, N-terminal;;IPR002772:Glycoside hydrolase, family 3, C-terminal;;IPR017853:Glycoside hydrolase, catalytic core	sp|A5ABF5|BGLM_ASPNC Probable beta-glucosidase M OS=Aspergillus niger (strain CBS 513.88 / FGSC A1513) GN=bglM PE=3 SV=1:780.4	3.2.1.21:Beta-glucosidase.	-	hydrolase activity, hydrolyzing O-glycosyl compounds:GO:0004553;;carbohydrate metabolic process:GO:0005975;;beta-glucosidase activity:GO:0008422	01.05.02.07 sugar, glucoside, polyol and carboxylate catabolism N.crassa	01.05.03 polysaccharide metabolism
fgenesh1_pm.22_#_120	fgenesh1_pm.22_#_120	fgenesh1_pm.22_#_120	scaffold_22:401029-402541	87.843	40.9784	-1.10006	0.00356288	yes	133200	IPR006710:Glycoside hydrolase, family 43	sp|Q45071|XYND_BACSU Arabinoxylan arabinofuranohydrolase OS=Bacillus subtilis GN=xynD PE=1 SV=2:91.6633	-	-	hydrolase activity, hydrolyzing O-glycosyl compounds:GO:0004553;;carbohydrate metabolic process:GO:0005975
estExt_Genemark1.C_110133	estExt_Genemark1.C_110133	estExt_Genemark1.C_110133	scaffold_11:479257-481230	336.39	149.233	-1.17256	0.00651561	yes	25284	IPR001382:Glycoside hydrolase, family 47	sp|Q2ULB2|MNS1B_ASPOR Mannosyl-oligosaccharide alpha-1,2-mannosidase 1B OS=Aspergillus oryzae (strain ATCC 42149 / RIB 40) GN=mns1B PE=1 SV=1:252.677	3.2.1.113:Mannosyl-oligosaccharide 1,2-alpha-mannosidase.	KOG2204:Mannosyl-oligosaccharide alpha-1,2-mannosidase and related glycosyl hydrolases	calcium ion binding:GO:0005509;;membrane:GO:0016020;;mannosyl-oligosaccharide 1,2-alpha-mannosidase activity:GO:0004571	01.05 C-compound and carbohydrate metabolism	01.05.02 sugar, glucoside, polyol and carboxylate metabolism	01.05.03 polysaccharide metabolism	14.07.02 modification with sugar residues (e.g. glycosylation, deglycosylation) N.crassa	14.07.02.02 N-directed glycosylation, deglycosylation S.cerevisiae	16.17.01 calcium binding
estExt_fgenesh1_pg.C_140111	estExt_fgenesh1_pg.C_140111	estExt_fgenesh1_pg.C_140111	scaffold_14:422915-424890	121.72	49.7858	-1.28976	0.000395856	yes	142027	IPR000757:Glycoside hydrolase, family 16;;IPR008985:Concanavalin A-like lectin/glucanase	sp|Q8N0N3|BGBP_PENMO Beta-1,3-glucan-binding protein OS=Penaeus monodon PE=2 SV=1:195.282	-	-	hydrolase activity, hydrolyzing O-glycosyl compounds:GO:0004553;;carbohydrate metabolic process:GO:0005975	01.05.03 polysaccharide metabolism	42.01 cell wall	16.05 polysaccharide binding
e_gw1.2.1750.1	e_gw1.2.1750.1	e_gw1.2.1750.1	scaffold_2:154899-157939	38.0274	15.1204	-1.33054	0.0004007	yes	71660	IPR013616:Chitin synthase N-terminal;;IPR004834:Chitin synthase	sp|P30589|CHS2_NEUCR Chitin synthase 2 OS=Neurospora crassa GN=chs-2 PE=3 SV=3:1447.57	2.4.1.16:Chitin synthase.	KOG2571:Chitin synthase/hyaluronan synthase (glycosyltransferases)	chitin biosynthetic process:GO:0006031;;chitin synthase activity:GO:0004100	01.05.03 polysaccharide metabolism	10.03.03 cytokinesis (cell division) /septum formation and hydrolysis S.cerevisiae	32.01.03 osmotic and salt stress response	42.01 cell wall	43.01.03.05 budding, cell polarity and filament formation S.cerevisiae
e_gw1.14.248.1	e_gw1.14.248.1	e_gw1.14.248.1	scaffold_14:98494-100962	78.2624	29.8406	-1.39104	0.00011109	yes	83535	IPR008928:Six-hairpin glycosidase-like;;IPR011613:Glycoside hydrolase 15-related	sp|Q10211|YAY3_SCHPO Uncharacterized protein C4H3.03c OS=Schizosaccharomyces pombe (strain ATCC 38366 / 972) GN=SPAC4H3.03c PE=2 SV=1:556.984	-	-	glucan 1,4-alpha-glucosidase activity:GO:0004339;;catalytic activity:GO:0003824;;polysaccharide metabolic process:GO:0005976
estExt_Genewise1Plus.C_6_t10170	estExt_Genewise1Plus.C_6_t10170	estExt_Genewise1Plus.C_6_t10170	scaffold_6:177295-178679	504.406	186.837	-1.43281	0.000175057	yes	97721	IPR002594:Glycoside hydrolase, family 12;;IPR008985:Concanavalin A-like lectin/glucanase	sp|A1CRJ0|XGEA_ASPCL Probable xyloglucan-specific endo-beta-1,4-glucanase A OS=Aspergillus clavatus (strain ATCC 1007 / CBS 513.65 / DSM 816 / NCTC 3887 / NRRL 1) GN=xgeA PE=3 SV=1:66.6254	-	-	polysaccharide catabolic process:GO:0000272;;cellulase activity:GO:0008810
fgenesh1_pm.4_#_383	fgenesh1_pm.4_#_383	fgenesh1_pm.4_#_383	scaffold_4:1281329-1284686	54.4658	19.6991	-1.46722	3.85e-05	yes	128386	IPR011330:Glycoside hydrolase/deacetylase, beta/alpha-barrel;;IPR015341:Glycoside hydrolase, family 38, central region;;IPR000602:Glycoside hydrolase, family 38, core;;IPR011682:Glycosyl hydrolases 38, C-terminal	sp|Q9UT61|MAN1_SCHPO Alpha-mannosidase OS=Schizosaccharomyces pombe (strain ATCC 38366 / 972) GN=ams1 PE=2 SV=1:981.089	3.2.1.24:Alpha-mannosidase.	KOG4342:Alpha-mannosidase	carbohydrate metabolic process:GO:0005975;;mannosidase activity:GO:0015923;;mannose metabolic process:GO:0006013;;catalytic activity:GO:0003824;;alpha-mannosidase activity:GO:0004559	01.05.02 sugar, glucoside, polyol and carboxylate metabolism	01.05.02.07 sugar, glucoside, polyol and carboxylate catabolism S.cerevisiae	01.05.03 polysaccharide metabolism
estExt_fgenesh2_kg.C_60126	estExt_fgenesh2_kg.C_60126	estExt_fgenesh2_kg.C_60126	scaffold_6:980804-981939	38.0341	13.7447	-1.46842	0.00165302	yes	122916	IPR017853:Glycoside hydrolase, catalytic core;;IPR001223:Glycoside hydrolase, family 18, catalytic domain;;IPR001579:Glycoside hydrolase, chitinase active site	sp|P29027|CHI2_RHIOL Chitinase 2 OS=Rhizopus oligosporus GN=CHI2 PE=1 SV=1:67.781	-	-	hydrolase activity, hydrolyzing O-glycosyl compounds:GO:0004553;;carbohydrate metabolic process:GO:0005975	01.05 C-compound and carbohydrate metabolism	42.01 cell wall
estExt_fgenesh1_pg.C_110155	estExt_fgenesh1_pg.C_110155	estExt_fgenesh1_pg.C_110155	scaffold_11:590494-592463	144.348	50.5125	-1.51484	3.88e-05	yes	141702	IPR017853:Glycoside hydrolase, catalytic core	sp|Q4WC60|BTGE_ASPFU Probable beta-glucosidase btgE OS=Neosartorya fumigata (strain ATCC MYA-4609 / Af293 / CBS 101355 / FGSC A1100) GN=btgE PE=3 SV=2:397.897	3.2.1.58:Glucan 1,3-beta-glucosidase.	KOG1216:von Willebrand factor and related coagulation proteins	glucan 1,3-beta-glucosidase activity:GO:0004338	01.05.03 polysaccharide metabolism	42.01 cell wall
estExt_fgenesh1_pg.C_60058	estExt_fgenesh1_pg.C_60058	estExt_fgenesh1_pg.C_60058	scaffold_6:182994-186256	165.718	51.4136	-1.68851	7.15e-06	yes	140893	IPR001173:Glycosyl transferase, family 2;;IPR016196:MFS general substrate transporter	sp|O82859|BCSA2_GLUXY Cellulose synthase catalytic subunit [UDP-forming] OS=Gluconacetobacter xylinus GN=bcsA PE=3 SV=1:145.206	-	-	-
e_gw1.1.1209.1	e_gw1.1.1209.1	e_gw1.1.1209.1	scaffold_1:414413-415643	37.1936	11.3384	-1.71384	0.000171284	yes	68509	IPR017853:Glycoside hydrolase, catalytic core;;IPR001547:Glycoside hydrolase, family 5	sp|P23548|GUN_PAEPO Endoglucanase OS=Paenibacillus polymyxa PE=3 SV=2:148.288	-	-	hydrolase activity, hydrolyzing O-glycosyl compounds:GO:0004553;;carbohydrate metabolic process:GO:0005975	01.05.03 polysaccharide metabolism
estExt_fgenesh1_pm.C_450006	estExt_fgenesh1_pm.C_450006	estExt_fgenesh1_pm.C_450006	scaffold_45:23993-26339	53.2331	15.977	-1.73633	3.16e-06	yes	139518	IPR004835:Fungal chitin synthase	sp|P78746|CHSD_ASPFU Chitin synthase D OS=Neosartorya fumigata (strain ATCC MYA-4609 / Af293 / CBS 101355 / FGSC A1100) GN=chsD PE=3 SV=1:829.706	-	KOG2571:Chitin synthase/hyaluronan synthase (glycosyltransferases)	transferase activity, transferring hexosyl groups:GO:0016758	01.05.09.04 aminosaccharide anabolism	42.01 cell wall
estExt_Genewise1Plus.C_8_t10025	estExt_Genewise1Plus.C_8_t10025	estExt_Genewise1Plus.C_8_t10025	scaffold_8:25324-30733	157.018	44.6596	-1.81389	9.43e-06	yes	98699	IPR001609:Myosin head, motor region;;IPR004835:Fungal chitin synthase;;IPR001199:Cytochrome b5;;IPR014876:DEK C terminal	sp|O13395|CHS6_USTMA Chitin synthase 6 OS=Ustilago maydis GN=CHS6 PE=3 SV=2:1019.61	2.4.1.16:Chitin synthase.	KOG2571:Chitin synthase/hyaluronan synthase (glycosyltransferases)	transferase activity, transferring hexosyl groups:GO:0016758;;ATP binding:GO:0005524;;chitin synthase activity:GO:0004100;;transition metal ion binding:GO:0046914;;myosin complex:GO:0016459;;heme binding:GO:0020037;;motor activity:GO:0003774	01.05.03 polysaccharide metabolism	42.01 cell wall
estExt_fgenesh1_pm.C_80009	estExt_fgenesh1_pm.C_80009	estExt_fgenesh1_pm.C_80009	scaffold_8:36024-42484	239.327	58.9839	-2.02059	7.15e-06	yes	137093	IPR001609:Myosin head, motor region;;IPR004835:Fungal chitin synthase;;IPR001199:Cytochrome b5;;IPR014876:DEK C terminal;;IPR002078:RNA polymerase sigma factor 54, interaction	sp|Q4P9K9|CHS8_USTMA Chitin synthase 8 OS=Ustilago maydis GN=CHS8 PE=3 SV=1:55.4546;;sp|Q4P9K9|CHS8_USTMA Chitin synthase 8 OS=Ustilago maydis GN=CHS8 PE=3 SV=1:1397.88	2.4.1.16:Chitin synthase.	KOG2571:Chitin synthase/hyaluronan synthase (glycosyltransferases)	regulation of transcription, DNA-dependent:GO:0006355;;chitin synthase activity:GO:0004100;;transition metal ion binding:GO:0046914;;myosin complex:GO:0016459;;transcription factor binding:GO:0008134;;motor activity:GO:0003774;;ATP binding:GO:0005524;;transferase activity, transferring hexosyl groups:GO:0016758;;heme binding:GO:0020037;;intracellular:GO:0005622	01.05.03 polysaccharide metabolism	42.01 cell wall
estExt_Genemark1.C_2_t10174	estExt_Genemark1.C_2_t10174	estExt_Genemark1.C_2_t10174	scaffold_2:623534-627273	330.914	74.923	-2.14298	1.15e-07	yes	23636	IPR011833:Glycogen/starch/alpha-glucan phosphorylase;;IPR000811:Glycosyl transferase, family 35	sp|P06738|PHSG_YEAST Glycogen phosphorylase OS=Saccharomyces cerevisiae (strain ATCC 204508 / S288c) GN=GPH1 PE=1 SV=4:1074.69	2.4.1.1:Phosphorylase.	KOG2099:Glycogen phosphorylase	glycogen phosphorylase activity:GO:0008184;;pyridoxal phosphate binding:GO:0030170;;carbohydrate metabolic process:GO:0005975;;phosphorylase activity:GO:0004645	01.04 phosphate metabolism	01.05 C-compound and carbohydrate metabolism	01.05.02 sugar, glucoside, polyol and carboxylate metabolism	01.05.02.07 sugar, glucoside, polyol and carboxylate catabolism B.subtilis	01.05.03 polysaccharide metabolism	01.05.03.01 glycogen metabolism	01.05.03.01.07 glycogen catabolism	02.19 metabolism of energy reserves (e.g. glycogen, trehalose) N.crassa	16.19 nucleotide/nucleoside/nucleobase binding	16.21.17 pyridoxal phosphate binding
fgenesh1_pm.2_#_512	fgenesh1_pm.2_#_512	fgenesh1_pm.2_#_512	scaffold_2:1772063-1774896	189.111	22.943	-3.04311	0	yes	127187	IPR017853:Glycoside hydrolase, catalytic core;;IPR002016:Haem peroxidase, plant/fungal/bacterial;;IPR006102:Glycoside hydrolase family 2, immunoglobulin-like beta-sandwich;;IPR008979:Galactose-binding like	sp|B8NW36|MANBB_ASPFN Probable beta-mannosidase B OS=Aspergillus flavus (strain ATCC 200026 / FGSC A1120 / NRRL 3357 / JCM 12722 / SRRC 167) GN=mndB PE=3 SV=1:804.283	3.2.1.25:Beta-mannosidase.	KOG2230:Predicted beta-mannosidase	hydrolase activity, hydrolyzing O-glycosyl compounds:GO:0004553;;response to oxidative stress:GO:0006979;;carbohydrate metabolic process:GO:0005975;;electron transport:GO:0006118;;peroxidase activity:GO:0004601;;heme binding:GO:0020037;;beta-mannosidase activity:GO:0004567	01.05.03 polysaccharide metabolism
a The genes with red colors were also found in the section of genes down-regulated in △xyr1 compared to the parental strain Rut-C30 under lignocellulose condition.
