# Supplementary material for: RNA Sequencing Reveals Xyr1 as a Transcription Factor Regulating Gene Expression beyond Carbohydrate Metabolism
Source: Hindawi journal article supplement (doi:10.1155/2016/4841756), 2016-01-01
Supplement: f1 [file 4841756.f1.zip › addition files/Table S11. Δxyr1-Rut-C30_lignocellulose-DE transporters.xlsx]

## Sheet: Sheet1
Model	gene_id	gene	locus	FPKM_Δxyr1_lignocellulose	FPKM_Rut-C30_lignocellulose	log2(fold_change(Rut-C30_lignocellulose/Δxyr1_lignocellulose))	FPR_value	significant	Protein ID	IPRScan	SPROT	KEGG	KOG	GO	Funcat2
e_gw1.33.40.1	e_gw1.33.40.1	e_gw1.33.40.1	scaffold_33:41673-43456	0.0825215	193.318	11.1939	3.02137e-12	yes	91594	IPR005828:General substrate transporter;;IPR007114:Major facilitator superfamily;;IPR003663:Sugar transporter;;IPR016196:MFS general substrate transporter;;IPR005829:Sugar transporter, conserved site	sp|P38156|MAL31_YEAST Maltose permease MAL31 OS=Saccharomyces cerevisiae (strain ATCC 204508 / S288c) GN=MAL31 PE=1 SV=1:380.178	5.3.1.4:L-arabinose isomerase.	KOG0254:Predicted transporter (major facilitator superfamily)	sugar:hydrogen symporter activity:GO:0005351;;L-arabinose isomerase activity:GO:0008733;;carbohydrate transport:GO:0008643;;transporter activity:GO:0005215;;integral to membrane:GO:0016021;;transport:GO:0006810;;membrane:GO:0016020	01.05 C-compound and carbohydrate metabolism	20.01.03 C-compound and carbohydrate transport	20.01.03.01 sugar transport	20.09.18 cellular import	20.09.18.07 non-vesicular cellular import	20.03 transport facilities	20.03.02.02.01 proton driven symporter
estExt_fgenesh1_pm.C_190177	estExt_fgenesh1_pm.C_190177	estExt_fgenesh1_pm.C_190177	scaffold_19:569288-571762	1.21574	1443.12	10.2131	0	yes	138519	IPR005828:General substrate transporter;;IPR007114:Major facilitator superfamily;;IPR003663:Sugar transporter;;IPR016196:MFS general substrate transporter;;IPR005829:Sugar transporter, conserved site	sp|Q4U3U6|QAY_NEUAF Quinate permease OS=Neurospora africana GN=qa-y PE=3 SV=1:270.396	5.3.1.4:L-arabinose isomerase.	KOG0254:Predicted transporter (major facilitator superfamily)	sugar:hydrogen symporter activity:GO:0005351;;L-arabinose isomerase activity:GO:0008733;;carbohydrate transport:GO:0008643;;transporter activity:GO:0005215;;integral to membrane:GO:0016021;;transport:GO:0006810;;membrane:GO:0016020	20.01.03 C-compound and carbohydrate transport	20.09.18.07 non-vesicular cellular import
estExt_Genewise1Plus.C_5_t10017	estExt_Genewise1Plus.C_5_t10017	estExt_Genewise1Plus.C_5_t10017	scaffold_5:14664-16575	0.61506	46.5746	6.24267	0	yes	97259	IPR005828:General substrate transporter;;IPR007114:Major facilitator superfamily;;IPR003663:Sugar transporter;;IPR016196:MFS general substrate transporter	sp|P49374|HGT1_KLULA High-affinity glucose transporter OS=Kluyveromyces lactis (strain ATCC 8585 / CBS 2359 / DSM 70799 / NBRC 1267 / NRRL Y-1140 / WM37) GN=HGT1 PE=3 SV=1:176.022	5.3.1.4:L-arabinose isomerase.	KOG0254:Predicted transporter (major facilitator superfamily)	sugar:hydrogen symporter activity:GO:0005351;;L-arabinose isomerase activity:GO:0008733;;carbohydrate transport:GO:0008643;;transporter activity:GO:0005215;;integral to membrane:GO:0016021;;transport:GO:0006810;;membrane:GO:0016020	20.01.03 C-compound and carbohydrate transport	20.09.18 cellular import	20.09.18.07 non-vesicular cellular import	20.03 transport facilities
fgenesh1_pm.3_#_569	fgenesh1_pm.3_#_569	fgenesh1_pm.3_#_569	scaffold_3:1831840-1833598	1.07121	54.7638	5.67591	0	yes	127980	IPR005828:General substrate transporter;;IPR007114:Major facilitator superfamily;;IPR003663:Sugar transporter;;IPR016196:MFS general substrate transporter	sp|P07921|LACP_KLULA Lactose permease OS=Kluyveromyces lactis (strain ATCC 8585 / CBS 2359 / DSM 70799 / NBRC 1267 / NRRL Y-1140 / WM37) GN=LAC12 PE=3 SV=1:299.671	-	KOG0254:Predicted transporter (major facilitator superfamily)	sugar:hydrogen symporter activity:GO:0005351;;carbohydrate transport:GO:0008643;;transporter activity:GO:0005215;;integral to membrane:GO:0016021;;transport:GO:0006810;;membrane:GO:0016020
estExt_Genewise1.C_5_t30024	estExt_Genewise1.C_5_t30024	estExt_Genewise1.C_5_t30024	scaffold_5:1351555-1353881	209.25	3369.61	4.00928	0	yes	109243	IPR005828:General substrate transporter;;IPR007114:Major facilitator superfamily;;IPR003663:Sugar transporter;;IPR016196:MFS general substrate transporter;;IPR005829:Sugar transporter, conserved site	sp|P07921|LACP_KLULA Lactose permease OS=Kluyveromyces lactis (strain ATCC 8585 / CBS 2359 / DSM 70799 / NBRC 1267 / NRRL Y-1140 / WM37) GN=LAC12 PE=3 SV=1:279.256	5.3.1.4:L-arabinose isomerase.	KOG0254:Predicted transporter (major facilitator superfamily)	sugar:hydrogen symporter activity:GO:0005351;;L-arabinose isomerase activity:GO:0008733;;carbohydrate transport:GO:0008643;;transporter activity:GO:0005215;;integral to membrane:GO:0016021;;transport:GO:0006810;;membrane:GO:0016020	20.01.03 C-compound and carbohydrate transport	20.09.18 cellular import	20.09.18.07 non-vesicular cellular import	20.03 transport facilities
fgenesh1_pg.3_#_508	fgenesh1_pg.3_#_508	fgenesh1_pg.3_#_508	scaffold_3:1826016-1828000	5.8268	86.8839	3.89831	0	yes	33630	IPR005828:General substrate transporter;;IPR007114:Major facilitator superfamily;;IPR003663:Sugar transporter;;IPR016196:MFS general substrate transporter;;IPR005829:Sugar transporter, conserved site	sp|P49374|HGT1_KLULA High-affinity glucose transporter OS=Kluyveromyces lactis (strain ATCC 8585 / CBS 2359 / DSM 70799 / NBRC 1267 / NRRL Y-1140 / WM37) GN=HGT1 PE=3 SV=1:480.33	5.3.1.4:L-arabinose isomerase.	KOG0254:Predicted transporter (major facilitator superfamily)	sugar:hydrogen symporter activity:GO:0005351;;L-arabinose isomerase activity:GO:0008733;;carbohydrate transport:GO:0008643;;transporter activity:GO:0005215;;integral to membrane:GO:0016021;;transport:GO:0006810;;membrane:GO:0016020	20.01.03 C-compound and carbohydrate transport	20.09.18.07 non-vesicular cellular import
e_gw1.1.2809.1	e_gw1.1.2809.1	e_gw1.1.2809.1	scaffold_1:1946934-1948764	1.80174	23.7733	3.72188	4.52384e-12	yes	69330	IPR007114:Major facilitator superfamily;;IPR011701:Major facilitator superfamily MFS-1;;IPR016196:MFS general substrate transporter	sp|Q08280|BSC6_YEAST Bypass of stop codon protein 6 OS=Saccharomyces cerevisiae (strain ATCC 204508 / S288c) GN=BSC6 PE=1 SV=1:132.494	-	-	transporter activity:GO:0005215;;integral to membrane:GO:0016021;;transport:GO:0006810
estExt_Genewise1Plus.C_330027	estExt_Genewise1Plus.C_330027	estExt_Genewise1Plus.C_330027	scaffold_33:28099-29273	4.5827	39.0335	3.09044	6.96751e-10	yes	104464	IPR004853:Protein of unknown function DUF250	sp|Q9UUI8|YIY4_SCHPO Uncharacterized transporter C22F8.04 OS=Schizosaccharomyces pombe (strain ATCC 38366 / 972) GN=SPAC22F8.04 PE=2 SV=1:169.859	-	KOG1442:GDP-fucose transporter	-
estExt_Genemark1.C_390038	estExt_Genemark1.C_390038	estExt_Genemark1.C_390038	scaffold_39:127091-128961	7.81781	62.9677	3.00978	1.07705e-10	yes	26932	IPR005828:General substrate transporter;;IPR007114:Major facilitator superfamily;;IPR003663:Sugar transporter;;IPR016196:MFS general substrate transporter	sp|P39932|STL1_YEAST Sugar transporter STL1 OS=Saccharomyces cerevisiae (strain ATCC 204508 / S288c) GN=STL1 PE=1 SV=2:208.379	5.3.1.4:L-arabinose isomerase.	KOG0254:Predicted transporter (major facilitator superfamily)	sugar:hydrogen symporter activity:GO:0005351;;L-arabinose isomerase activity:GO:0008733;;carbohydrate transport:GO:0008643;;transporter activity:GO:0005215;;integral to membrane:GO:0016021;;transport:GO:0006810;;membrane:GO:0016020	01.05 C-compound and carbohydrate metabolism	01.05.25 regulation of C-compound and carbohydrate metabolism N.crassa	20.01.03 C-compound and carbohydrate transport	20.09.18 cellular import	20.09.18.07 non-vesicular cellular import	34.11.12 perception of nutrients and nutritional adaptation N.crassa	20.03 transport facilities
fgenesh1_pg.34_#_48	fgenesh1_pg.34_#_48	fgenesh1_pg.34_#_48	scaffold_34:162879-164184	1.28426	9.79927	2.93174	4.25195e-06	yes	39450	IPR007114:Major facilitator superfamily;;IPR011701:Major facilitator superfamily MFS-1;;IPR016196:MFS general substrate transporter	sp|Q08777|MCH5_YEAST Riboflavin transporter MCH5 OS=Saccharomyces cerevisiae (strain ATCC 204508 / S288c) GN=MCH5 PE=1 SV=1:144.821	-	KOG2504:Monocarboxylate transporter	transporter activity:GO:0005215;;integral to membrane:GO:0016021;;transport:GO:0006810	20.01.03 C-compound and carbohydrate transport	20.09.18.07 non-vesicular cellular import	20.03 transport facilities
e_gw1.6.1049.1	e_gw1.6.1049.1	e_gw1.6.1049.1	scaffold_6:1312069-1313803	21.3182	97.3869	2.19164	3.27777e-08	yes	76604	IPR007114:Major facilitator superfamily;;IPR011701:Major facilitator superfamily MFS-1;;IPR016196:MFS general substrate transporter	sp|O13714|YDZ7_SCHPO Uncharacterized membrane protein C14C4.07 OS=Schizosaccharomyces pombe (strain ATCC 38366 / 972) GN=SPAC14C4.07 PE=1 SV=1:60.4622	-	KOG2816:Predicted transporter ADD1 (major facilitator superfamily)	transporter activity:GO:0005215;;integral to membrane:GO:0016021;;transport:GO:0006810
estExt_Genewise1Plus.C_14_t20043	estExt_Genewise1Plus.C_14_t20043	estExt_Genewise1Plus.C_14_t20043	scaffold_14:698569-700828	55.509	232.079	2.06382	9.47192e-08	yes	101246	IPR005828:General substrate transporter;;IPR007114:Major facilitator superfamily;;IPR003663:Sugar transporter;;IPR016196:MFS general substrate transporter;;IPR005829:Sugar transporter, conserved site	sp|Q9XIH7|PLT1_ARATH Putative polyol transporter 1 OS=Arabidopsis thaliana GN=PLT1 PE=2 SV=1:187.963	5.3.1.4:L-arabinose isomerase.	KOG0254:Predicted transporter (major facilitator superfamily)	sugar:hydrogen symporter activity:GO:0005351;;L-arabinose isomerase activity:GO:0008733;;carbohydrate transport:GO:0008643;;transporter activity:GO:0005215;;integral to membrane:GO:0016021;;transport:GO:0006810;;membrane:GO:0016020	01.05 C-compound and carbohydrate metabolism	01.06 lipid, fatty acid and isoprenoid metabolism N.crassa	20.01.03 C-compound and carbohydrate transport	20.01.13 lipid/fatty acid transport	20.09.16 cellular export and secretion	20.09.18 cellular import	20.09.18.07 non-vesicular cellular import	20.03 transport facilities
fgenesh1_pm.7_#_187	fgenesh1_pm.7_#_187	fgenesh1_pm.7_#_187	scaffold_7:604696-605715	20.2012	83.3752	2.04517	2.91613e-05	yes	129514	IPR000425:Major intrinsic protein	sp|P0CD92|AQY1_YEASX Aquaporin-1 OS=Saccharomyces cerevisiae GN=AQY1 PE=2 SV=1:164.466	-	KOG0223:Aquaporin (major intrinsic protein family)	transporter activity:GO:0005215;;transport:GO:0006810;;membrane:GO:0016020	20.09.18.07 non-vesicular cellular import	20.03 transport facilities	20.03.01 channel / pore class transport	20.03.01.01 ion channels
estExt_Genewise1Plus.C_7_t20161	estExt_Genewise1Plus.C_7_t20161	estExt_Genewise1Plus.C_7_t20161	scaffold_7:822494-824456	3.08634	12.129	1.9745	0.00060038	yes	98410	IPR005828:General substrate transporter;;IPR007114:Major facilitator superfamily;;IPR004738:Phosphate permease;;IPR016196:MFS general substrate transporter;;IPR005829:Sugar transporter, conserved site	sp|P25297|PHO84_YEAST Inorganic phosphate transporter PHO84 OS=Saccharomyces cerevisiae (strain ATCC 204508 / S288c) GN=PHO84 PE=1 SV=2:594.349	-	KOG0252:Inorganic phosphate transporter	phosphate transport:GO:0006817;;transporter activity:GO:0005215;;inorganic phosphate transmembrane transporter activity:GO:0005315;;integral to membrane:GO:0016021;;transport:GO:0006810;;membrane:GO:0016020	01.04 phosphate metabolism	20.01.01.01.01 heavy metal ion transport (Cu+, Fe3+, etc.) S.cerevisiae	20.01.01.07 anion transport	20.01.01.07.07 phosphate transport	20.01.03 C-compound and carbohydrate transport	20.09.18 cellular import	34.01.01.03 homeostasis of protons	34.01.03.03 homeostasis of phosphate	20.03 transport facilities
gw1.21.443.1	gw1.21.443.1	gw1.21.443.1	scaffold_21:505074-507047	6.00703	21.8899	1.86555	0.000176699	yes	66301	IPR007114:Major facilitator superfamily;;IPR011701:Major facilitator superfamily MFS-1;;IPR016196:MFS general substrate transporter	sp|Q04301|VBA1_YEAST Vacuolar basic amino acid transporter 1 OS=Saccharomyces cerevisiae (strain ATCC 204508 / S288c) GN=VBA1 PE=1 SV=1:109.768	-	KOG0254:Predicted transporter (major facilitator superfamily)	transporter activity:GO:0005215;;integral to membrane:GO:0016021;;transport:GO:0006810
estExt_Genewise1Plus.C_15_t20071	estExt_Genewise1Plus.C_15_t20071	estExt_Genewise1Plus.C_15_t20071	scaffold_15:742156-743975	8.00495	24.5763	1.6183	0.00107354	yes	101532	IPR005828:General substrate transporter;;IPR007114:Major facilitator superfamily;;IPR003663:Sugar transporter;;IPR016196:MFS general substrate transporter;;IPR005829:Sugar transporter, conserved site	sp|Q4U3U4|QAY_NEUTR Quinate permease OS=Neurospora terricola GN=qa-y PE=3 SV=1:825.469	5.3.1.4:L-arabinose isomerase.	KOG0254:Predicted transporter (major facilitator superfamily)	sugar:hydrogen symporter activity:GO:0005351;;L-arabinose isomerase activity:GO:0008733;;carbohydrate transport:GO:0008643;;transporter activity:GO:0005215;;integral to membrane:GO:0016021;;transport:GO:0006810;;membrane:GO:0016020	20.01.03 C-compound and carbohydrate transport	20.09.18.07 non-vesicular cellular import
estExt_fgenesh1_pm.C_60043	estExt_fgenesh1_pm.C_60043	estExt_fgenesh1_pm.C_60043	scaffold_6:121526-123279	56.927	170.177	1.57985	0.000249584	yes	136711	IPR007114:Major facilitator superfamily;;IPR011701:Major facilitator superfamily MFS-1;;IPR016196:MFS general substrate transporter	sp|Q9P6J0|YHDC_SCHPO Uncharacterized transporter C1683.12 OS=Schizosaccharomyces pombe (strain ATCC 38366 / 972) GN=SPBC1683.12 PE=2 SV=1:172.555	-	KOG2533:Permease of the major facilitator superfamily	transporter activity:GO:0005215;;integral to membrane:GO:0016021;;transport:GO:0006810	20.01.03 C-compound and carbohydrate transport	20.01.23 allantoin and allantoate transport	20.01.25 vitamine/cofactor transport	20.09.18.07 non-vesicular cellular import	20.03 transport facilities
gm1.3367_g	gm1.3367_g	gm1.3367_g	scaffold_6:1047668-1050084	42.2366	118.196	1.48462	0.000164876	yes	7811	IPR005828:General substrate transporter;;IPR007114:Major facilitator superfamily;;IPR003663:Sugar transporter;;IPR016196:MFS general substrate transporter;;IPR005829:Sugar transporter, conserved site	sp|A2QQV6|QUTD_ASPNC Probable quinate permease OS=Aspergillus niger (strain CBS 513.88 / FGSC A1513) GN=qutD PE=3 SV=1:309.686	5.3.1.4:L-arabinose isomerase.	KOG0254:Predicted transporter (major facilitator superfamily)	sugar:hydrogen symporter activity:GO:0005351;;L-arabinose isomerase activity:GO:0008733;;carbohydrate transport:GO:0008643;;transporter activity:GO:0005215;;integral to membrane:GO:0016021;;transport:GO:0006810;;membrane:GO:0016020	01.05.25 regulation of C-compound and carbohydrate metabolism N.crassa	20.01.03 C-compound and carbohydrate transport	20.09.18 cellular import	20.09.18.07 non-vesicular cellular import	34.11.12 perception of nutrients and nutritional adaptation N.crassa	20.03 transport facilities
e_gw1.11.804.1	e_gw1.11.804.1	e_gw1.11.804.1	scaffold_11:91890-93192	92.1305	244.982	1.41093	0.000352314	yes	81893	IPR001395:Aldo/keto reductase;;IPR005399:Potassium channel, voltage-dependent, beta subunit, KCNAB-related	sp|Q40648|KCAB_ORYSJ Probable voltage-gated potassium channel subunit beta OS=Oryza sativa subsp. japonica GN=KOB1 PE=1 SV=2:367.466	1.1.1.91:Aryl-alcohol dehydrogenase (NADP+).	KOG1575:Voltage-gated shaker-like K+ channel, subunit beta/KCNAB	potassium ion transport:GO:0006813;;aryl-alcohol dehydrogenase (NADP+) activity:GO:0047681;;integral to membrane:GO:0016021;;oxidoreductase activity:GO:0016491	01.01 amino acid metabolism	01.01.09.04 metabolism of phenylalanine	01.01.09.05 metabolism of tyrosine	01.05 C-compound and carbohydrate metabolism	01.05.02.07 sugar, glucoside, polyol and carboxylate catabolism B.subtilis	01.06 lipid, fatty acid and isoprenoid metabolism T.acidophilum	01.07.01 biosynthesis of vitamins, cofactors, and prosthetic groups N.crassa	01.20 secondary metabolism	01.20.01.09 metabolism of aminoglycoside antibiotics T.acidophilum	02.01 glycolysis and gluconeogenesis	02.16 fermentation	20.01.01 ion transport	20.01.01.01 cation transport (H+, Na+, K+, Ca2+ , NH4+, etc.)	20.09.18 cellular import	34.01.01 homeostasis of cations	34.01.01.01 homeostasis of metal ions (Na, K, Ca etc.) &nbsp;	16.01 protein binding	16.17.03 potassium binding	16.19.03 ATP binding	16.21.07 NAD/NADP binding	18.02 regulation of protein activity	20.03.01 channel / pore class transport	20.03.01.01 ion channels	20.03.25 ABC transporters
estExt_Genewise1Plus.C_1_t60435	estExt_Genewise1Plus.C_1_t60435	estExt_Genewise1Plus.C_1_t60435	scaffold_1:3570857-3573106	100.493	267.078	1.41017	0.00145748	yes	95062	IPR005828:General substrate transporter;;IPR007114:Major facilitator superfamily;;IPR003663:Sugar transporter;;IPR016196:MFS general substrate transporter;;IPR005829:Sugar transporter, conserved site	sp|P53387|KHT2_KLULA Hexose transporter 2 OS=Kluyveromyces lactis (strain ATCC 8585 / CBS 2359 / DSM 70799 / NBRC 1267 / NRRL Y-1140 / WM37) GN=KHT2 PE=3 SV=1:435.647	5.3.1.4:L-arabinose isomerase.	KOG0254:Predicted transporter (major facilitator superfamily)	sugar:hydrogen symporter activity:GO:0005351;;L-arabinose isomerase activity:GO:0008733;;carbohydrate transport:GO:0008643;;transporter activity:GO:0005215;;integral to membrane:GO:0016021;;transport:GO:0006810;;membrane:GO:0016020	01.05 C-compound and carbohydrate metabolism	01.05.25 regulation of C-compound and carbohydrate metabolism N.crassa	20.01.03 C-compound and carbohydrate transport	20.01.03.01 sugar transport	20.01.13 lipid/fatty acid transport	20.09.16 cellular export and secretion	20.09.18 cellular import	20.09.18.07 non-vesicular cellular import	34.11.12 perception of nutrients and nutritional adaptation N.crassa	20.03 transport facilities
e_gw1.47.26.1	e_gw1.47.26.1	e_gw1.47.26.1	scaffold_47:67549-69126	11.1316	28.8916	1.37599	0.00646721	yes	93149	IPR007114:Major facilitator superfamily;;IPR011701:Major facilitator superfamily MFS-1;;IPR016196:MFS general substrate transporter	sp|O74923|YJ7D_SCHPO Uncharacterized transporter C757.13 OS=Schizosaccharomyces pombe (strain ATCC 38366 / 972) GN=SPCC757.13 PE=2 SV=1:285.419	-	KOG2533:Permease of the major facilitator superfamily	transporter activity:GO:0005215;;integral to membrane:GO:0016021;;transport:GO:0006810	20.01.23 allantoin and allantoate transport	20.09.18 cellular import	20.09.18.07 non-vesicular cellular import
estExt_fgenesh1_pm.C_130181	estExt_fgenesh1_pm.C_130181	estExt_fgenesh1_pm.C_130181	scaffold_13:633759-635726	72.5324	32.9047	-1.14033	0.00646488	yes	137900	IPR001046:Natural resistance-associated macrophage protein	sp|P38925|SMF1_YEAST Manganese transporter SMF1 OS=Saccharomyces cerevisiae (strain ATCC 204508 / S288c) GN=SMF1 PE=1 SV=2:506.908	-	KOG1291:Mn2+ and Fe2+ transporters of the NRAMP family	transporter activity:GO:0005215;;transport:GO:0006810;;membrane:GO:0016020	10.03.01 mitotic cell cycle and cell cycle control N.crassa	14.04 protein targeting, sorting and translocation S.cerevisiae	20.01.01.01.01 heavy metal ion transport (Cu+, Fe3+, etc.) N.crassa	20.09.04 mitochondrial transport	20.09.18 cellular import	20.09.18.07 non-vesicular cellular import	34.01.01.01 homeostasis of metal ions (Na, K, Ca etc.) N.crassa
estExt_fgenesh1_pm.C_400037	estExt_fgenesh1_pm.C_400037	estExt_fgenesh1_pm.C_400037	scaffold_40:106843-109333	205.031	84.8858	-1.27225	0.00185129	yes	139450	IPR002293:Amino acid/polyamine transporter I;;IPR004841:Amino acid permease-associated region	sp|P53388|DIP5_YEAST Dicarboxylic amino acid permease OS=Saccharomyces cerevisiae (strain ATCC 204508 / S288c) GN=DIP5 PE=1 SV=1:550.821	-	KOG1286:Amino acid transporters	amino acid transmembrane transporter activity:GO:0015171;;transport:GO:0006810;;membrane:GO:0016020;;amino acid transport:GO:0006865	20.01.07 amino acid/amino acid derivatives transport S.cerevisiae	20.09.18.07 non-vesicular cellular import
estExt_Genewise1.C_300130	estExt_Genewise1.C_300130	estExt_Genewise1.C_300130	scaffold_30:125827-128025	210.125	83.831	-1.3257	0.00193957	yes	115870	IPR011701:Major facilitator superfamily MFS-1;;IPR016196:MFS general substrate transporter	sp|P39980|SIT1_YEAST Siderophore iron transporter 1 OS=Saccharomyces cerevisiae (strain ATCC 204508 / S288c) GN=SIT1 PE=2 SV=1:509.22	-	KOG0254:Predicted transporter (major facilitator superfamily)	-	01.07 metabolism of vitamins, cofactors, and prosthetic groups S.cerevisiae	20.01.01.01.01.01 siderophore-iron transport	20.01.27 drug/toxin transport	20.09.18 cellular import	20.09.18.07 non-vesicular cellular import	32.07 detoxification	34.01.01.01 homeostasis of metal ions (Na, K, Ca etc.) S.cerevisiae	20.03 transport facilities	20.03.22 transport ATPases	20.03.25 ABC transporters
estExt_fgenesh1_pm.C_1_t20495	estExt_fgenesh1_pm.C_1_t20495	estExt_fgenesh1_pm.C_1_t20495	scaffold_1:3334787-3336251	95.8985	38.0794	-1.3325	0.00103087	yes	135686	IPR009486:Purine nucleoside permease	sp|O74493|YCR5_SCHPO Uncharacterized protein C285.05 OS=Schizosaccharomyces pombe (strain ATCC 38366 / 972) GN=SPCC285.05 PE=2 SV=1:224.942	-	-	-	20.01.17 nucleotide/nucleoside/nucleobase transport N.crassa
estExt_Genewise1Plus.C_4_t10493	estExt_Genewise1Plus.C_4_t10493	estExt_Genewise1Plus.C_4_t10493	scaffold_4:572290-575703	105.797	41.4463	-1.35199	0.000648752	yes	96862	IPR006153:Sodium/hydrogen exchanger;;IPR013928:Alkali metal cation/H+ antiporter Nha1, C-terminal	sp|Q99271|NAH1_YEAST Na(+)/H(+) antiporter OS=Saccharomyces cerevisiae (strain ATCC 204508 / S288c) GN=NHA1 PE=1 SV=1:579.326	-	KOG4505:Na+/H+ antiporter	solute:hydrogen antiporter activity:GO:0015299;;regulation of pH:GO:0006885;;integral to membrane:GO:0016021	20.01.01.01 cation transport (H+, Na+, K+, Ca2+ , NH4+, etc.) N.crassa	32.01.03 osmotic and salt stress response	34.01.01.01 homeostasis of metal ions (Na, K, Ca etc.) N.crassa	34.01.01.03 homeostasis of protons	20.03.02.03 antiporter
estExt_Genewise1Plus.C_2_t30204	estExt_Genewise1Plus.C_2_t30204	estExt_Genewise1Plus.C_2_t30204	scaffold_2:1490563-1493499	61.7258	22.8368	-1.43451	0.000126602	yes	95662	IPR003445:Cation transporter;;IPR004773:Potassium transport protein, high-affinity	sp|P28584|TRK2_YEAST Low-affinity potassium transport protein OS=Saccharomyces cerevisiae (strain ATCC 204508 / S288c) GN=TRK2 PE=1 SV=1:525.398	-	KOG1341:Na+/K+ transporter	potassium ion transport:GO:0006813;;cation transmembrane transporter activity:GO:0008324;;cation transport:GO:0006812;;integral to membrane:GO:0016021;;potassium ion transmembrane transporter activity:GO:0015079	20.01.01.01 cation transport (H+, Na+, K+, Ca2+ , NH4+, etc.) N.crassa	20.09.18 cellular import	20.09.18.07 non-vesicular cellular import	34.01.01.01 homeostasis of metal ions (Na, K, Ca etc.) N.crassa
e_gw1.29.209.1	e_gw1.29.209.1	e_gw1.29.209.1	scaffold_29:246016-250027	57.4847	20.5406	-1.4847	9.52969e-05	yes	90456	IPR005821:Ion transport	sp|Q12324|YVC1_YEAST Calcium channel YVC1 OS=Saccharomyces cerevisiae (strain ATCC 204508 / S288c) GN=YVC1 PE=1 SV=2:81.2629	-	KOG3609:Receptor-activated Ca2+-permeable cation channels (STRPC family)	ion transport:GO:0006811;;ion channel activity:GO:0005216;;membrane:GO:0016020
e_gw1.1.2349.1	e_gw1.1.2349.1	e_gw1.1.2349.1	scaffold_1:164190-166273	24.8854	8.8006	-1.49963	0.00258863	yes	68277	IPR005828:General substrate transporter;;IPR007114:Major facilitator superfamily;;IPR003663:Sugar transporter;;IPR016196:MFS general substrate transporter;;IPR005829:Sugar transporter, conserved site	sp|P10870|SNF3_YEAST High-affinity glucose transporter SNF3 OS=Saccharomyces cerevisiae (strain ATCC 204508 / S288c) GN=SNF3 PE=1 SV=3:226.868	5.3.1.4:L-arabinose isomerase.	KOG0254:Predicted transporter (major facilitator superfamily)	sugar:hydrogen symporter activity:GO:0005351;;L-arabinose isomerase activity:GO:0008733;;carbohydrate transport:GO:0008643;;transporter activity:GO:0005215;;integral to membrane:GO:0016021;;transport:GO:0006810;;membrane:GO:0016020	01.05.25 regulation of C-compound and carbohydrate metabolism N.crassa	20.01.03 C-compound and carbohydrate transport	20.01.03.01 sugar transport	20.09.18 cellular import	20.09.18.07 non-vesicular cellular import	34.01.01.03 homeostasis of protons	34.11.12 perception of nutrients and nutritional adaptation N.crassa	20.03 transport facilities	20.03.02.02.01 proton driven symporter
estExt_Genewise1.C_7_t10106	estExt_Genewise1.C_7_t10106	estExt_Genewise1.C_7_t10106	scaffold_7:115889-120654	160.754	53.4323	-1.58907	0.000254576	yes	109810	IPR003593:AAA+ ATPase, core;;IPR010929:CDR ABC transporter;;IPR013525:ABC-2 type transporter;;IPR003439:ABC transporter-like	sp|O74676|CDR4_CANAL ABC transporter CDR4 OS=Candida albicans GN=CDR4 PE=3 SV=1:1495.72	-	KOG0065:Pleiotropic drug resistance proteins (PDR1-15), ABC superfamily	nucleoside-triphosphatase activity:GO:0017111;;ATP binding:GO:0005524;;integral to membrane:GO:0016021;;transport:GO:0006810;;ATPase activity:GO:0016887;;ATPase activity, coupled to transmembrane movement of substances:GO:0042626;;nucleotide binding:GO:0000166	01.04 phosphate metabolism	01.05 C-compound and carbohydrate metabolism	20.01.01.01 cation transport (H+, Na+, K+, Ca2+ , NH4+, etc.) S.cerevisiae	20.01.03 C-compound and carbohydrate transport	20.01.13 lipid/fatty acid transport	20.01.27 drug/toxin transport	20.09.16.01 Type I protein secretion system (ABC-type transport systems) N.crassa	32.01.01 oxidative stress response	32.05.01.03 chemical agent resistance	32.07 detoxification	32.07.05 detoxification by export	34.01.01.01 homeostasis of metal ions (Na, K, Ca etc.) S.cerevisiae	16.19.03 ATP binding	20.03.22 transport ATPases	20.03.25 ABC transporters
e_gw1.17.226.1	e_gw1.17.226.1	e_gw1.17.226.1	scaffold_17:460453-462286	13.489	4.37854	-1.62326	0.00367236	yes	85254	IPR005828:General substrate transporter;;IPR007114:Major facilitator superfamily;;IPR003663:Sugar transporter;;IPR016196:MFS general substrate transporter;;IPR005829:Sugar transporter, conserved site	sp|Q4U3U4|QAY_NEUTR Quinate permease OS=Neurospora terricola GN=qa-y PE=3 SV=1:232.646	5.3.1.4:L-arabinose isomerase.	KOG0254:Predicted transporter (major facilitator superfamily)	sugar:hydrogen symporter activity:GO:0005351;;L-arabinose isomerase activity:GO:0008733;;carbohydrate transport:GO:0008643;;transporter activity:GO:0005215;;integral to membrane:GO:0016021;;transport:GO:0006810;;membrane:GO:0016020	20.01.03 C-compound and carbohydrate transport	20.09.18.07 non-vesicular cellular import
estExt_fgenesh1_pm.C_2_t10242	estExt_fgenesh1_pm.C_2_t10242	estExt_fgenesh1_pm.C_2_t10242	scaffold_2:820368-822817	292.408	92.1734	-1.66556	8.27627e-05	yes	135838	IPR007114:Major facilitator superfamily;;IPR011701:Major facilitator superfamily MFS-1;;IPR016196:MFS general substrate transporter;;IPR001958:Tetracycline resistance protein, TetA	sp|P25351|YCR3_YEAST Uncharacterized membrane protein YCR023C OS=Saccharomyces cerevisiae (strain ATCC 204508 / S288c) GN=YCR023C PE=1 SV=2:237.654	-	KOG2615:Permease of the major facilitator superfamily	tetracycline:hydrogen antiporter activity:GO:0015520;;transporter activity:GO:0005215;;integral to membrane:GO:0016021;;transport:GO:0006810;;response to antibiotic:GO:0046677;;tetracycline transport:GO:0015904	32.07 detoxification	20.03 transport facilities
gm1.7978_g	gm1.7978_g	gm1.7978_g	scaffold_29:318087-321159	77.661	23.4967	-1.72474	2.4766e-06	yes	12422	IPR007114:Major facilitator superfamily;;IPR011701:Major facilitator superfamily MFS-1;;IPR016196:MFS general substrate transporter	sp|O94343|YHMA_SCHPO Uncharacterized MFS-type transporter C1271.10c OS=Schizosaccharomyces pombe (strain ATCC 38366 / 972) GN=SPBC1271.10c PE=1 SV=1:114.39;;sp|O94343|YHMA_SCHPO Uncharacterized MFS-type transporter C1271.10c OS=Schizosaccharomyces pombe (strain ATCC 38366 / 972) GN=SPBC1271.10c PE=1 SV=1:88.9669	-	KOG0255:Synaptic vesicle transporter SVOP and related transporters (major facilitator superfamily)	transporter activity:GO:0005215;;integral to membrane:GO:0016021;;transport:GO:0006810	20.01.27 drug/toxin transport	20.03 transport facilities
estExt_fgenesh1_pm.C_70249	estExt_fgenesh1_pm.C_70249	estExt_fgenesh1_pm.C_70249	scaffold_7:851052-853310	822.138	245.745	-1.74222	0.00111582	yes	136988	IPR005828:General substrate transporter;;IPR007114:Major facilitator superfamily;;IPR003663:Sugar transporter;;IPR016196:MFS general substrate transporter;;IPR005829:Sugar transporter, conserved site	sp|Q92253|RCO3_NEUCR Probable glucose transporter rco-3 OS=Neurospora crassa GN=rco-3 PE=3 SV=2:335.109	5.3.1.4:L-arabinose isomerase.	KOG0254:Predicted transporter (major facilitator superfamily)	sugar:hydrogen symporter activity:GO:0005351;;L-arabinose isomerase activity:GO:0008733;;carbohydrate transport:GO:0008643;;transporter activity:GO:0005215;;integral to membrane:GO:0016021;;transport:GO:0006810;;membrane:GO:0016020	01.05 C-compound and carbohydrate metabolism	01.05.25 regulation of C-compound and carbohydrate metabolism N.crassa	20.01.03 C-compound and carbohydrate transport	20.01.03.01 sugar transport	20.09.16 cellular export and secretion	20.09.18 cellular import	20.09.18.07 non-vesicular cellular import	34.11.12 perception of nutrients and nutritional adaptation N.crassa	20.03 transport facilities
e_gw1.7.830.1	e_gw1.7.830.1	e_gw1.7.830.1	scaffold_7:571646-572451	107.413	30.8034	-1.80201	9.16172e-05	yes	77893	IPR000791:GPR1/FUN34/yaaH	sp|P32907|ATO2_YEAST Ammonia transport outward protein 2 OS=Saccharomyces cerevisiae (strain ATCC 204508 / S288c) GN=ATO2 PE=1 SV=1:120.553	-	-	membrane:GO:0016020	01.02 nitrogen, sulfur and selenium metabolism S.cerevisiae	01.03.16.03 DNA degradation	01.05.25 regulation of C-compound and carbohydrate metabolism S.cerevisiae	10.01 DNA processing	10.03.02 meiosis	20.01.01.01 cation transport (H+, Na+, K+, Ca2+ , NH4+, etc.) S.cerevisiae	20.01.03 C-compound and carbohydrate transport	20.03 transport facilities	20.03.02.03.01 proton driven antiporter
e_gw1.38.59.1	e_gw1.38.59.1	e_gw1.38.59.1	scaffold_38:92448-93587	499.841	138.978	-1.84661	5.67579e-07	yes	92240	IPR012269:Aquaporin;;IPR000425:Major intrinsic protein	sp|P43549|YFF4_YEAST Uncharacterized membrane protein YFL054C OS=Saccharomyces cerevisiae (strain ATCC 204508 / S288c) GN=YFL054C PE=1 SV=1:204.912	-	KOG0224:Aquaporin (major intrinsic protein family)	transporter activity:GO:0005215;;integral to membrane:GO:0016021;;transport:GO:0006810;;membrane:GO:0016020	20.01.03 C-compound and carbohydrate transport	20.01.11 amine / polyamine transport	20.09.18 cellular import	20.03 transport facilities	20.03.01 channel / pore class transport
estExt_Genewise1Plus.C_7_t20167	estExt_Genewise1Plus.C_7_t20167	estExt_Genewise1Plus.C_7_t20167	scaffold_7:832780-835898	188.545	50.8688	-1.89006	7.93961e-07	yes	98413	IPR006153:Sodium/hydrogen exchanger	sp|Q9P7I1|KHA1_SCHPO K(+)/H(+) antiporter 1 OS=Schizosaccharomyces pombe (strain ATCC 38366 / 972) GN=kha1 PE=2 SV=1:447.588	-	KOG1650:Predicted K+/H+-antiporter	solute:hydrogen antiporter activity:GO:0015299;;regulation of pH:GO:0006885;;integral to membrane:GO:0016021	20.01.01.01 cation transport (H+, Na+, K+, Ca2+ , NH4+, etc.) N.crassa	34.01.01.01 homeostasis of metal ions (Na, K, Ca etc.) N.crassa	34.01.01.03 homeostasis of protons
estExt_fgenesh1_pg.C_60145	estExt_fgenesh1_pg.C_60145	estExt_fgenesh1_pg.C_60145	scaffold_6:476173-478095	29.6616	7.931	-1.90302	3.93677e-05	yes	140920	IPR007114:Major facilitator superfamily;;IPR011701:Major facilitator superfamily MFS-1;;IPR016196:MFS general substrate transporter	sp|P36035|JEN1_YEAST Carboxylic acid transporter protein homolog OS=Saccharomyces cerevisiae (strain ATCC 204508 / S288c) GN=JEN1 PE=1 SV=1:230.335	-	KOG0255:Synaptic vesicle transporter SVOP and related transporters (major facilitator superfamily)	transporter activity:GO:0005215;;integral to membrane:GO:0016021;;transport:GO:0006810	01.05 C-compound and carbohydrate metabolism	20.01.03 C-compound and carbohydrate transport	20.03 transport facilities
e_gw1.38.9.1	e_gw1.38.9.1	e_gw1.38.9.1	scaffold_38:57190-58744	14.2495	3.74138	-1.92926	0.000417592	yes	92315	IPR007114:Major facilitator superfamily;;IPR011701:Major facilitator superfamily MFS-1;;IPR016196:MFS general substrate transporter	sp|Q12256|TPO4_YEAST Polyamine transporter 4 OS=Saccharomyces cerevisiae (strain ATCC 204508 / S288c) GN=TPO4 PE=1 SV=1:259.225	-	KOG0255:Synaptic vesicle transporter SVOP and related transporters (major facilitator superfamily)	transporter activity:GO:0005215;;integral to membrane:GO:0016021;;transport:GO:0006810	20.01.27 drug/toxin transport	32.05.05.01 toxins	32.07 detoxification	32.07.05 detoxification by export	34.11.03 chemoperception and response	20.03.02.03.01 proton driven antiporter
estExt_fgenesh1_pm.C_140179	estExt_fgenesh1_pm.C_140179	estExt_fgenesh1_pm.C_140179	scaffold_14:614168-618974	14.298	3.69212	-1.95329	4.0954e-06	yes	138024	IPR003593:AAA+ ATPase, core;;IPR003439:ABC transporter-like	sp|Q8R420|ABCA3_MOUSE ATP-binding cassette sub-family A member 3 OS=Mus musculus GN=Abca3 PE=2 SV=2:186.808;;sp|Q8R420|ABCA3_MOUSE ATP-binding cassette sub-family A member 3 OS=Mus musculus GN=Abca3 PE=2 SV=2:146.747;;sp|Q8R420|ABCA3_MOUSE ATP-binding cassette sub-family A member 3 OS=Mus musculus GN=Abca3 PE=2 SV=2:381.333	-	KOG0059:Lipid exporter ABCA1 and related proteins, ABC superfamily	nucleoside-triphosphatase activity:GO:0017111;;ATP binding:GO:0005524;;ATPase activity:GO:0016887;;nucleotide binding:GO:0000166	16.19.03 ATP binding	20.03.25 ABC transporters
estExt_Genewise1Plus.C_390082	estExt_Genewise1Plus.C_390082	estExt_Genewise1Plus.C_390082	scaffold_39:83896-88507	34.5771	8.52965	-2.01926	4.09183e-08	yes	104881	IPR003593:AAA+ ATPase, core;;IPR010929:CDR ABC transporter;;IPR013525:ABC-2 type transporter;;IPR003439:ABC transporter-like	sp|P41820|BFR1_SCHPO Brefeldin A resistance protein OS=Schizosaccharomyces pombe (strain ATCC 38366 / 972) GN=bfr1 PE=1 SV=1:1140.95	-	KOG0065:Pleiotropic drug resistance proteins (PDR1-15), ABC superfamily	nucleoside-triphosphatase activity:GO:0017111;;ATP binding:GO:0005524;;integral to membrane:GO:0016021;;transport:GO:0006810;;ATPase activity:GO:0016887;;ATPase activity, coupled to transmembrane movement of substances:GO:0042626;;nucleotide binding:GO:0000166	01.04 phosphate metabolism	01.05 C-compound and carbohydrate metabolism	20.01.01.01 cation transport (H+, Na+, K+, Ca2+ , NH4+, etc.) S.cerevisiae	20.01.03 C-compound and carbohydrate transport	20.01.13 lipid/fatty acid transport	20.01.27 drug/toxin transport	20.09.16.01 Type I protein secretion system (ABC-type transport systems) N.crassa	32.01.01 oxidative stress response	32.05.01.03 chemical agent resistance	32.07 detoxification	32.07.05 detoxification by export	34.01.01.01 homeostasis of metal ions (Na, K, Ca etc.) S.cerevisiae	16.19.03 ATP binding	20.03.22 transport ATPases	20.03.25 ABC transporters
e_gw1.4.746.1	e_gw1.4.746.1	e_gw1.4.746.1	scaffold_4:124855-126950	161.659	38.5493	-2.06817	5.47934e-09	yes	74437	IPR005828:General substrate transporter;;IPR007114:Major facilitator superfamily;;IPR003663:Sugar transporter;;IPR016196:MFS general substrate transporter;;IPR005829:Sugar transporter, conserved site	sp|Q9XIH7|PLT1_ARATH Putative polyol transporter 1 OS=Arabidopsis thaliana GN=PLT1 PE=2 SV=1:196.052	5.3.1.4:L-arabinose isomerase.	KOG0254:Predicted transporter (major facilitator superfamily)	sugar:hydrogen symporter activity:GO:0005351;;L-arabinose isomerase activity:GO:0008733;;carbohydrate transport:GO:0008643;;transporter activity:GO:0005215;;integral to membrane:GO:0016021;;transport:GO:0006810;;membrane:GO:0016020	01.05 C-compound and carbohydrate metabolism	01.06 lipid, fatty acid and isoprenoid metabolism N.crassa	20.01.03 C-compound and carbohydrate transport	20.01.13 lipid/fatty acid transport	20.09.16 cellular export and secretion	20.09.18 cellular import	20.09.18.07 non-vesicular cellular import	20.03 transport facilities
e_gw1.1.2919.1	e_gw1.1.2919.1	e_gw1.1.2919.1	scaffold_1:174527-176931	17.3628	4.00113	-2.11752	4.35077e-05	yes	68445	IPR002293:Amino acid/polyamine transporter I;;IPR004841:Amino acid permease-associated region	sp|Q9UT18|YFYA_SCHPO Uncharacterized amino-acid permease C9.10 OS=Schizosaccharomyces pombe (strain ATCC 38366 / 972) GN=SPAC9.10 PE=1 SV=1:531.176	-	KOG1289:Amino acid transporters	amino acid transmembrane transporter activity:GO:0015171;;transport:GO:0006810;;membrane:GO:0016020;;amino acid transport:GO:0006865	20.01.03 C-compound and carbohydrate transport	20.03 transport facilities
estExt_Genewise1.C_330194	estExt_Genewise1.C_330194	estExt_Genewise1.C_330194	scaffold_33:212851-217715	108.181	23.5144	-2.20183	3.11383e-09	yes	116127	IPR004827:Basic-leucine zipper (bZIP) transcription factor;;IPR003593:AAA+ ATPase, core;;IPR010929:CDR ABC transporter;;IPR013525:ABC-2 type transporter;;IPR003439:ABC transporter-like	sp|O74208|PDH1_CANGA ATP-binding cassette transporter CGR1 OS=Candida glabrata (strain ATCC 2001 / CBS 138 / JCM 3761 / NBRC 0622 / NRRL Y-65) GN=PDH1 PE=3 SV=3:1317.75	-	KOG0065:Pleiotropic drug resistance proteins (PDR1-15), ABC superfamily	regulation of transcription, DNA-dependent:GO:0006355;;nucleus:GO:0005634;;nucleoside-triphosphatase activity:GO:0017111;;integral to membrane:GO:0016021;;ATPase activity, coupled to transmembrane movement of substances:GO:0042626;;transcription factor activity:GO:0003700;;nucleotide binding:GO:0000166;;sequence-specific DNA binding:GO:0043565;;ATP binding:GO:0005524;;transport:GO:0006810;;ATPase…	01.04 phosphate metabolism	01.05 C-compound and carbohydrate metabolism	20.01.01.01 cation transport (H+, Na+, K+, Ca2+ , NH4+, etc.) S.cerevisiae	20.01.03 C-compound and carbohydrate transport	20.01.13 lipid/fatty acid transport	20.01.27 drug/toxin transport	20.09.16.01 Type I protein secretion system (ABC-type transport systems) N.crassa	32.01.01 oxidative stress response	32.05.01.03 chemical agent resistance	32.07 detoxification	32.07.05 detoxification by export	34.01.01.01 homeostasis of metal ions (Na, K, Ca etc.) S.cerevisiae	16.19.03 ATP binding	20.03.22 transport ATPases	20.03.25 ABC transporters
fgenesh1_pg.4_#_259	fgenesh1_pg.4_#_259	fgenesh1_pg.4_#_259	scaffold_4:969166-973591	1222.03	263.673	-2.21245	0.000111995	yes	33912	IPR003593:AAA+ ATPase, core;;IPR011527:ABC transporter, transmembrane region, type 1;;IPR001140:ABC transporter, transmembrane region;;IPR003439:ABC transporter-like	sp|P36619|PMD1_SCHPO Leptomycin B resistance protein pmd1 OS=Schizosaccharomyces pombe (strain ATCC 38366 / 972) GN=pmd1 PE=2 SV=2:296.975;;sp|P36619|PMD1_SCHPO Leptomycin B resistance protein pmd1 OS=Schizosaccharomyces pombe (strain ATCC 38366 / 972) GN=pmd1 PE=2 SV=2:857.055	-	KOG0055:Multidrug/pheromone exporter, ABC superfamily	nucleoside-triphosphatase activity:GO:0017111;;ATP binding:GO:0005524;;integral to membrane:GO:0016021;;ATPase activity:GO:0016887;;transport:GO:0006810;;nucleotide binding:GO:0000166;;ATPase activity, coupled to transmembrane movement of substances:GO:0042626	01.04 phosphate metabolism	20.01.01.01 cation transport (H+, Na+, K+, Ca2+ , NH4+, etc.)	20.01.03 C-compound and carbohydrate transport	20.01.09 peptide transport	20.01.27 drug/toxin transport	20.09.16 cellular export and secretion	20.09.16.01 Type I protein secretion system (ABC-type transport systems) N.crassa	32.05.01 resistance proteins	32.07.05 detoxification by export	34.11.03 chemoperception and response	34.11.03.07 pheromone response, mating-type determination, sex-specific proteins S.cerevisiae	16.19 nucleotide/nucleoside/nucleobase binding	16.19.03 ATP binding	20.03 transport facilities	20.03.22 transport ATPases	20.03.25 ABC transporters
e_gw1.4.1160.1	e_gw1.4.1160.1	e_gw1.4.1160.1	scaffold_4:952917-957177	82.1649	11.4133	-2.84781	0	yes	73914	IPR003593:AAA+ ATPase, core;;IPR010929:CDR ABC transporter;;IPR013525:ABC-2 type transporter;;IPR003439:ABC transporter-like	sp|P53756|PDR18_YEAST ABC transporter ATP-binding protein/permease PDR18 OS=Saccharomyces cerevisiae (strain ATCC 204508 / S288c) GN=PDR18 PE=2 SV=1:987.252	-	KOG0065:Pleiotropic drug resistance proteins (PDR1-15), ABC superfamily	nucleoside-triphosphatase activity:GO:0017111;;ATP binding:GO:0005524;;integral to membrane:GO:0016021;;transport:GO:0006810;;ATPase activity:GO:0016887;;ATPase activity, coupled to transmembrane movement of substances:GO:0042626;;nucleotide binding:GO:0000166	01.04 phosphate metabolism	01.05 C-compound and carbohydrate metabolism	20.01.01.01 cation transport (H+, Na+, K+, Ca2+ , NH4+, etc.) S.cerevisiae	20.01.03 C-compound and carbohydrate transport	20.01.13 lipid/fatty acid transport	20.01.27 drug/toxin transport	20.09.16.01 Type I protein secretion system (ABC-type transport systems) N.crassa	32.01.01 oxidative stress response	32.05.01.03 chemical agent resistance	32.07 detoxification	32.07.05 detoxification by export	34.01.01.01 homeostasis of metal ions (Na, K, Ca etc.) S.cerevisiae	16.19.03 ATP binding	20.03.22 transport ATPases	20.03.25 ABC transporters
estExt_fgenesh1_pg.C_90227	estExt_fgenesh1_pg.C_90227	estExt_fgenesh1_pg.C_90227	scaffold_9:883494-884747	57.9989	6.18057	-3.23021	4.02476e-12	yes	141480	IPR012269:Aquaporin;;IPR000425:Major intrinsic protein	sp|P43549|YFF4_YEAST Uncharacterized membrane protein YFL054C OS=Saccharomyces cerevisiae (strain ATCC 204508 / S288c) GN=YFL054C PE=1 SV=1:207.994	-	KOG0224:Aquaporin (major intrinsic protein family)	transporter activity:GO:0005215;;integral to membrane:GO:0016021;;transport:GO:0006810;;membrane:GO:0016020	20.01.03 C-compound and carbohydrate transport	20.09.18 cellular import	20.03.01 channel / pore class transport
e_gw1.5.334.1	e_gw1.5.334.1	e_gw1.5.334.1	scaffold_5:218064-222476	18.6885	0.783219	-4.57659	0	yes	75459	IPR003593:AAA+ ATPase, core;;IPR010929:CDR ABC transporter;;IPR013525:ABC-2 type transporter;;IPR003439:ABC transporter-like	sp|O74676|CDR4_CANAL ABC transporter CDR4 OS=Candida albicans GN=CDR4 PE=3 SV=1:1482.23	-	KOG0065:Pleiotropic drug resistance proteins (PDR1-15), ABC superfamily	nucleoside-triphosphatase activity:GO:0017111;;ATP binding:GO:0005524;;integral to membrane:GO:0016021;;transport:GO:0006810;;ATPase activity:GO:0016887;;ATPase activity, coupled to transmembrane movement of substances:GO:0042626;;nucleotide binding:GO:0000166	01.04 phosphate metabolism	01.05 C-compound and carbohydrate metabolism	20.01.01.01 cation transport (H+, Na+, K+, Ca2+ , NH4+, etc.) S.cerevisiae	20.01.03 C-compound and carbohydrate transport	20.01.13 lipid/fatty acid transport	20.01.27 drug/toxin transport	20.09.16.01 Type I protein secretion system (ABC-type transport systems) N.crassa	32.01.01 oxidative stress response	32.05.01.03 chemical agent resistance	32.07 detoxification	32.07.05 detoxification by export	34.01.01.01 homeostasis of metal ions (Na, K, Ca etc.) S.cerevisiae	16.19.03 ATP binding	20.03.22 transport ATPases	20.03.25 ABC transporters
a The genes with red colors were also found in the section of genes down-regulated in △xyr1 compared to the parental strain Rut-C30 under lignocellulose condition.
																2.A.1.1: The sugar transporter family			4
																2.A.1.2: The drug:H+ Antiporter-1 (12 Spanner)(DHA1) family			3
																2.A.1.12: Sialate:H+ Symporter (SHS) family			1
														9		2.A.1.16: The Siderophore-Iron Transporter (SIT) family			1
														7
														5
														1
														2
														2
														1
																2.A.1.1: The sugar transporter family			11
																2.A.1.7: The fucose:H+ Symporter (FHS) Family			1
																2.A.1.8: The Nitrate/Nitrate Porter (NNP) Family			1
																2.A.1.9: The phosphate:H+ Symporter (PHS) Family			1
																2.A.1.13: The Monocarboxylate Porter (MCP) Family			1
																2.A.1.14: The Anion:Cation Symporter (ACS) Family			2
														18		2.A.1.48: The Vacuolar Basic Amino Acid Transporter (VBAAT) Family			1
														1
														1
														1
