# Supplementary material for: RNA Sequencing Reveals Xyr1 as a Transcription Factor Regulating Gene Expression beyond Carbohydrate Metabolism
Source: Hindawi journal article supplement (doi:10.1155/2016/4841756), 2016-01-01
Supplement: f1 [file 4841756.f1.zip › addition files/Table S12. Rut-30 (glucose)-and-Rut-C30 (lignocellulose)-DE.tbl-transporter genes.xlsx]

## Sheet: Sheet1
Model	gene_id	gene	locus	FPKM_Rut-C30_glucose	FPKM_Rut-C30_lignocellulose	log2(fold_change(Rut-C30_lignocellulose/Rut-C30_glucose))	FDR_value	significant	Protein ID a, b	IPRScan	SPROT	KEGG	KOG	GO	Funcat2
e_gw1.33.40.1	e_gw1.33.40.1	e_gw1.33.40.1	scaffold_33:41673-43456	0.155784	193.318	10.2772	0	yes	91594	IPR005828:General substrate transporter;;IPR007114:Major facilitator superfamily;;IPR003663:Sugar transporter;;IPR016196:MFS general substrate transporter;;IPR005829:Sugar transporter, conserved site	sp|P38156|MAL31_YEAST Maltose permease MAL31 OS=Saccharomyces cerevisiae (strain ATCC 204508 / S288c) GN=MAL31 PE=1 SV=1:380.178	5.3.1.4:L-arabinose isomerase.	KOG0254:Predicted transporter (major facilitator superfamily)	sugar:hydrogen symporter activity:GO:0005351;;L-arabinose isomerase activity:GO:0008733;;carbohydrate transport:GO:0008643;;transporter activity:GO:0005215;;integral to membrane:GO:0016021;;transport:GO:0006810;;membrane:GO:0016020	01.05 C-compound and carbohydrate metabolism	20.01.03 C-compound and carbohydrate transport	20.01.03.01 sugar transport	20.09.18 cellular import	20.09.18.07 non-vesicular cellular import	20.03 transport facilities	20.03.02.02.01 proton driven symporter
fgenesh1_pg.3_#_508	fgenesh1_pg.3_#_508	fgenesh1_pg.3_#_508	scaffold_3:1826016-1828000	0.410061	86.8839	7.72711	0	yes	33630	IPR005828:General substrate transporter;;IPR007114:Major facilitator superfamily;;IPR003663:Sugar transporter;;IPR016196:MFS general substrate transporter;;IPR005829:Sugar transporter, conserved site	sp|P49374|HGT1_KLULA High-affinity glucose transporter OS=Kluyveromyces lactis (strain ATCC 8585 / CBS 2359 / DSM 70799 / NBRC 1267 / NRRL Y-1140 / WM37) GN=HGT1 PE=3 SV=1:480.33	5.3.1.4:L-arabinose isomerase.	KOG0254:Predicted transporter (major facilitator superfamily)	sugar:hydrogen symporter activity:GO:0005351;;L-arabinose isomerase activity:GO:0008733;;carbohydrate transport:GO:0008643;;transporter activity:GO:0005215;;integral to membrane:GO:0016021;;transport:GO:0006810;;membrane:GO:0016020	20.01.03 C-compound and carbohydrate transport	20.09.18.07 non-vesicular cellular import
estExt_fgenesh1_pm.C_190177	estExt_fgenesh1_pm.C_190177	estExt_fgenesh1_pm.C_190177	scaffold_19:569288-571762	11.3381	1443.12	6.99187	0	yes	138519	IPR005828:General substrate transporter;;IPR007114:Major facilitator superfamily;;IPR003663:Sugar transporter;;IPR016196:MFS general substrate transporter;;IPR005829:Sugar transporter, conserved site	sp|Q4U3U6|QAY_NEUAF Quinate permease OS=Neurospora africana GN=qa-y PE=3 SV=1:270.396	5.3.1.4:L-arabinose isomerase.	KOG0254:Predicted transporter (major facilitator superfamily)	sugar:hydrogen symporter activity:GO:0005351;;L-arabinose isomerase activity:GO:0008733;;carbohydrate transport:GO:0008643;;transporter activity:GO:0005215;;integral to membrane:GO:0016021;;transport:GO:0006810;;membrane:GO:0016020	20.01.03 C-compound and carbohydrate transport	20.09.18.07 non-vesicular cellular import
estExt_Genemark1.C_390038	estExt_Genemark1.C_390038	estExt_Genemark1.C_390038	scaffold_39:127091-128961	1.92211	62.9677	5.03385	0	yes	26932	IPR005828:General substrate transporter;;IPR007114:Major facilitator superfamily;;IPR003663:Sugar transporter;;IPR016196:MFS general substrate transporter	sp|P39932|STL1_YEAST Sugar transporter STL1 OS=Saccharomyces cerevisiae (strain ATCC 204508 / S288c) GN=STL1 PE=1 SV=2:208.379	5.3.1.4:L-arabinose isomerase.	KOG0254:Predicted transporter (major facilitator superfamily)	sugar:hydrogen symporter activity:GO:0005351;;L-arabinose isomerase activity:GO:0008733;;carbohydrate transport:GO:0008643;;transporter activity:GO:0005215;;integral to membrane:GO:0016021;;transport:GO:0006810;;membrane:GO:0016020	01.05 C-compound and carbohydrate metabolism	01.05.25 regulation of C-compound and carbohydrate metabolism N.crassa	20.01.03 C-compound and carbohydrate transport	20.09.18 cellular import	20.09.18.07 non-vesicular cellular import	34.11.12 perception of nutrients and nutritional adaptation N.crassa	20.03 transport facilities
fgenesh1_pm.3_#_569	fgenesh1_pm.3_#_569	fgenesh1_pm.3_#_569	scaffold_3:1831840-1833598	1.68282	54.7638	5.02427	0	yes	127980	IPR005828:General substrate transporter;;IPR007114:Major facilitator superfamily;;IPR003663:Sugar transporter;;IPR016196:MFS general substrate transporter	sp|P07921|LACP_KLULA Lactose permease OS=Kluyveromyces lactis (strain ATCC 8585 / CBS 2359 / DSM 70799 / NBRC 1267 / NRRL Y-1140 / WM37) GN=LAC12 PE=3 SV=1:299.671	-	KOG0254:Predicted transporter (major facilitator superfamily)	sugar:hydrogen symporter activity:GO:0005351;;carbohydrate transport:GO:0008643;;transporter activity:GO:0005215;;integral to membrane:GO:0016021;;transport:GO:0006810;;membrane:GO:0016020
estExt_Genewise1Plus.C_2_t10435	estExt_Genewise1Plus.C_2_t10435	estExt_Genewise1Plus.C_2_t10435	scaffold_2:514415-516584	5.18898	132.193	4.67105	0	yes	95281	IPR007114:Major facilitator superfamily;;IPR011701:Major facilitator superfamily MFS-1;;IPR016196:MFS general substrate transporter	sp|Q00357|TOXA_COCCA Putative HC-toxin efflux carrier TOXA OS=Cochliobolus carbonum GN=TOXA PE=3 SV=1:300.056	-	KOG0254:Predicted transporter (major facilitator superfamily)	transporter activity:GO:0005215;;integral to membrane:GO:0016021;;transport:GO:0006810	20.01.27 drug/toxin transport	20.09.16 cellular export and secretion	20.09.16.01 Type I protein secretion system (ABC-type transport systems) N.crassa	32.05.01 resistance proteins	32.07.05 detoxification by export	20.03.25 ABC transporters
e_gw1.4.746.1	e_gw1.4.746.1	e_gw1.4.746.1	scaffold_4:124855-126950	1.84162	38.5493	4.38766	0	yes	74437	IPR005828:General substrate transporter;;IPR007114:Major facilitator superfamily;;IPR003663:Sugar transporter;;IPR016196:MFS general substrate transporter;;IPR005829:Sugar transporter, conserved site	sp|Q9XIH7|PLT1_ARATH Putative polyol transporter 1 OS=Arabidopsis thaliana GN=PLT1 PE=2 SV=1:196.052	5.3.1.4:L-arabinose isomerase.	KOG0254:Predicted transporter (major facilitator superfamily)	sugar:hydrogen symporter activity:GO:0005351;;L-arabinose isomerase activity:GO:0008733;;carbohydrate transport:GO:0008643;;transporter activity:GO:0005215;;integral to membrane:GO:0016021;;transport:GO:0006810;;membrane:GO:0016020	01.05 C-compound and carbohydrate metabolism	01.06 lipid, fatty acid and isoprenoid metabolism N.crassa	20.01.03 C-compound and carbohydrate transport	20.01.13 lipid/fatty acid transport	20.09.16 cellular export and secretion	20.09.18 cellular import	20.09.18.07 non-vesicular cellular import	20.03 transport facilities
estExt_fgenesh1_pm.C_270029	estExt_fgenesh1_pm.C_270029	estExt_fgenesh1_pm.C_270029	scaffold_27:108659-112768	3.41359	71.0769	4.38002	0	yes	139005	IPR008250:E1-E2 ATPase-associated region;;IPR001757:ATPase, P-type, K/Mg/Cd/Cu/Zn/Na/Ca/Na/H-transporter;;IPR005834:Haloacid dehalogenase-like hydrolase;;IPR004014:ATPase, P-type cation-transporter, N-terminal;;IPR006068:ATPase, P-type cation-transporter, C-terminal;;IPR006414:Potassium/sodium efflux P-type ATPase, fungal-type	sp|P22189|ATC3_SCHPO Calcium-transporting ATPase 3 OS=Schizosaccharomyces pombe (strain ATCC 38366 / 972) GN=cta3 PE=1 SV=1:899.427	3.6.3.8:Calcium-transporting ATPase.	KOG0202:Ca2+ transporting ATPase	cation transport:GO:0006812;;integral to membrane:GO:0016021;;ATPase activity, coupled to transmembrane movement of ions, phosphorylative mechanism:GO:0015662;;membrane:GO:0016020;;hydrolase activity, acting on acid anhydrides, catalyzing transmembrane movement of substances:GO:0016820;;calcium-transporting ATPase activity:GO:0005388;;ATP binding:GO:0005524;;metabolic process:GO:0008152;;catalyti…	20.01.01.01 cation transport (H+, Na+, K+, Ca2+ , NH4+, etc.) N.crassa	20.09 transport routes	32.01.04 pH stress response	34.01.01 homeostasis of cations	34.01.01.01 homeostasis of metal ions (Na, K, Ca etc.) N.crassa	20.03.22 transport ATPases
estExt_Genewise1Plus.C_5_t10017	estExt_Genewise1Plus.C_5_t10017	estExt_Genewise1Plus.C_5_t10017	scaffold_5:14664-16575	2.32497	46.5746	4.32426	0	yes	97259	IPR005828:General substrate transporter;;IPR007114:Major facilitator superfamily;;IPR003663:Sugar transporter;;IPR016196:MFS general substrate transporter	sp|P49374|HGT1_KLULA High-affinity glucose transporter OS=Kluyveromyces lactis (strain ATCC 8585 / CBS 2359 / DSM 70799 / NBRC 1267 / NRRL Y-1140 / WM37) GN=HGT1 PE=3 SV=1:176.022	5.3.1.4:L-arabinose isomerase.	KOG0254:Predicted transporter (major facilitator superfamily)	sugar:hydrogen symporter activity:GO:0005351;;L-arabinose isomerase activity:GO:0008733;;carbohydrate transport:GO:0008643;;transporter activity:GO:0005215;;integral to membrane:GO:0016021;;transport:GO:0006810;;membrane:GO:0016020	20.01.03 C-compound and carbohydrate transport	20.09.18 cellular import	20.09.18.07 non-vesicular cellular import	20.03 transport facilities
estExt_Genewise1Plus.C_14_t20043	estExt_Genewise1Plus.C_14_t20043	estExt_Genewise1Plus.C_14_t20043	scaffold_14:698569-700828	14.9	232.077	3.96122	0	yes	101246	IPR005828:General substrate transporter;;IPR007114:Major facilitator superfamily;;IPR003663:Sugar transporter;;IPR016196:MFS general substrate transporter;;IPR005829:Sugar transporter, conserved site	sp|Q9XIH7|PLT1_ARATH Putative polyol transporter 1 OS=Arabidopsis thaliana GN=PLT1 PE=2 SV=1:187.963	5.3.1.4:L-arabinose isomerase.	KOG0254:Predicted transporter (major facilitator superfamily)	sugar:hydrogen symporter activity:GO:0005351;;L-arabinose isomerase activity:GO:0008733;;carbohydrate transport:GO:0008643;;transporter activity:GO:0005215;;integral to membrane:GO:0016021;;transport:GO:0006810;;membrane:GO:0016020	01.05 C-compound and carbohydrate metabolism	01.06 lipid, fatty acid and isoprenoid metabolism N.crassa	20.01.03 C-compound and carbohydrate transport	20.01.13 lipid/fatty acid transport	20.09.16 cellular export and secretion	20.09.18 cellular import	20.09.18.07 non-vesicular cellular import	20.03 transport facilities
e_gw1.31.204.1	e_gw1.31.204.1	e_gw1.31.204.1	scaffold_31:198739-200583	1.15615	11.4635	3.30965	8.98e-09	yes	91130	IPR007114:Major facilitator superfamily;;IPR011701:Major facilitator superfamily MFS-1;;IPR016196:MFS general substrate transporter	sp|P53322|TNA1_YEAST High-affinity nicotinic acid transporter OS=Saccharomyces cerevisiae (strain ATCC 204508 / S288c) GN=TNA1 PE=1 SV=1:228.794	-	KOG2533:Permease of the major facilitator superfamily	transporter activity:GO:0005215;;integral to membrane:GO:0016021;;transport:GO:0006810	20.01.03 C-compound and carbohydrate transport	20.01.23 allantoin and allantoate transport	20.01.25 vitamine/cofactor transport	20.09.18 cellular import	20.09.18.07 non-vesicular cellular import	20.03 transport facilities
estExt_fgenesh1_pm.C_50224	estExt_fgenesh1_pm.C_50224	estExt_fgenesh1_pm.C_50224	scaffold_5:751797-753482	34.6685	253.822	2.87212	8.58e-12	yes	136619	IPR005828:General substrate transporter;;IPR007114:Major facilitator superfamily;;IPR003663:Sugar transporter;;IPR016196:MFS general substrate transporter;;IPR005829:Sugar transporter, conserved site	sp|P39932|STL1_YEAST Sugar transporter STL1 OS=Saccharomyces cerevisiae (strain ATCC 204508 / S288c) GN=STL1 PE=1 SV=2:490.73	5.3.1.4:L-arabinose isomerase.	KOG0254:Predicted transporter (major facilitator superfamily)	sugar:hydrogen symporter activity:GO:0005351;;L-arabinose isomerase activity:GO:0008733;;carbohydrate transport:GO:0008643;;transporter activity:GO:0005215;;integral to membrane:GO:0016021;;transport:GO:0006810;;membrane:GO:0016020	20.01.03 C-compound and carbohydrate transport	20.09.18 cellular import	20.03 transport facilities
e_gw1.7.830.1	e_gw1.7.830.1	e_gw1.7.830.1	scaffold_7:571646-572451	6.92341	30.8034	2.15354	8.71e-05	yes	77893	IPR000791:GPR1/FUN34/yaaH	sp|P32907|ATO2_YEAST Ammonia transport outward protein 2 OS=Saccharomyces cerevisiae (strain ATCC 204508 / S288c) GN=ATO2 PE=1 SV=1:120.553	-	-	membrane:GO:0016020	01.02 nitrogen, sulfur and selenium metabolism S.cerevisiae	01.03.16.03 DNA degradation	01.05.25 regulation of C-compound and carbohydrate metabolism S.cerevisiae	10.01 DNA processing	10.03.02 meiosis	20.01.01.01 cation transport (H+, Na+, K+, Ca2+ , NH4+, etc.) S.cerevisiae	20.01.03 C-compound and carbohydrate transport	20.03 transport facilities	20.03.02.03.01 proton driven antiporter
fgenesh1_pm.7_#_187	fgenesh1_pm.7_#_187	fgenesh1_pm.7_#_187	scaffold_7:604696-605715	19.1442	83.3752	2.12271	4.42e-06	yes	129514	IPR000425:Major intrinsic protein	sp|P0CD92|AQY1_YEASX Aquaporin-1 OS=Saccharomyces cerevisiae GN=AQY1 PE=2 SV=1:164.466	-	KOG0223:Aquaporin (major intrinsic protein family)	transporter activity:GO:0005215;;transport:GO:0006810;;membrane:GO:0016020	20.09.18.07 non-vesicular cellular import	20.03 transport facilities	20.03.01 channel / pore class transport	20.03.01.01 ion channels
estExt_Genemark1.C_1_t20460	estExt_Genemark1.C_1_t20460	estExt_Genemark1.C_1_t20460	scaffold_1:3404286-3407818	62.3529	234.694	1.91225	1.54e-06	yes	23525	IPR011701:Major facilitator superfamily MFS-1;;IPR016196:MFS general substrate transporter	sp|P39980|SIT1_YEAST Siderophore iron transporter 1 OS=Saccharomyces cerevisiae (strain ATCC 204508 / S288c) GN=SIT1 PE=2 SV=1:374.785	-	KOG0254:Predicted transporter (major facilitator superfamily)	-
estExt_fgenesh1_pm.C_400037	estExt_fgenesh1_pm.C_400037	estExt_fgenesh1_pm.C_400037	scaffold_40:106843-109333	22.8252	84.8858	1.89489	7.63e-07	yes	139450	IPR002293:Amino acid/polyamine transporter I;;IPR004841:Amino acid permease-associated region	sp|P53388|DIP5_YEAST Dicarboxylic amino acid permease OS=Saccharomyces cerevisiae (strain ATCC 204508 / S288c) GN=DIP5 PE=1 SV=1:550.821	-	KOG1286:Amino acid transporters	amino acid transmembrane transporter activity:GO:0015171;;transport:GO:0006810;;membrane:GO:0016020;;amino acid transport:GO:0006865	20.01.07 amino acid/amino acid derivatives transport S.cerevisiae	20.09.18.07 non-vesicular cellular import
estExt_Genewise1Plus.C_210115	estExt_Genewise1Plus.C_210115	estExt_Genewise1Plus.C_210115	scaffold_21:146645-148714	90.8997	324.066	1.83394	2.52e-06	yes	102793	IPR007114:Major facilitator superfamily;;IPR011701:Major facilitator superfamily MFS-1;;IPR016196:MFS general substrate transporter	sp|Q9C101|YKT8_SCHPO Uncharacterized MFS-type transporter PB1E7.08c OS=Schizosaccharomyces pombe (strain ATCC 38366 / 972) GN=SPAPB1E7.08c PE=1 SV=1:365.54	-	KOG0253:Synaptic vesicle transporter SV2 (major facilitator superfamily)	transporter activity:GO:0005215;;integral to membrane:GO:0016021;;transport:GO:0006810
gm1.3179_g	gm1.3179_g	gm1.3179_g	scaffold_6:420973-422808	2.63682	7.80751	1.56607	0.00888763	yes	7623	IPR005828:General substrate transporter;;IPR007114:Major facilitator superfamily;;IPR003663:Sugar transporter;;IPR016196:MFS general substrate transporter;;IPR005829:Sugar transporter, conserved site	sp|P53387|KHT2_KLULA Hexose transporter 2 OS=Kluyveromyces lactis (strain ATCC 8585 / CBS 2359 / DSM 70799 / NBRC 1267 / NRRL Y-1140 / WM37) GN=KHT2 PE=3 SV=1:410.609	5.3.1.4:L-arabinose isomerase.	KOG0254:Predicted transporter (major facilitator superfamily)	sugar:hydrogen symporter activity:GO:0005351;;L-arabinose isomerase activity:GO:0008733;;carbohydrate transport:GO:0008643;;transporter activity:GO:0005215;;integral to membrane:GO:0016021;;transport:GO:0006810;;membrane:GO:0016020	01.05 C-compound and carbohydrate metabolism	01.05.25 regulation of C-compound and carbohydrate metabolism N.crassa	20.01.03 C-compound and carbohydrate transport	20.01.03.01 sugar transport	20.09.16 cellular export and secretion	20.09.18 cellular import	20.09.18.07 non-vesicular cellular import	34.11.12 perception of nutrients and nutritional adaptation N.crassa	20.03 transport facilities
estExt_Genewise1Plus.C_1_t30008	estExt_Genewise1Plus.C_1_t30008	estExt_Genewise1Plus.C_1_t30008	scaffold_1:1335926-1337460	14.1437	41.1429	1.54049	0.000594895	yes	94181	IPR013657:UAA transporter	sp|Q5B5W2|HUT1_EMENI UDP-galactose transporter homolog 1 OS=Emericella nidulans GN=hut1 PE=3 SV=1:414.075	-	KOG1581:UDP-galactose transporter related protein	-	20.01.03 C-compound and carbohydrate transport	20.01.03.01 sugar transport
gm1.3367_g	gm1.3367_g	gm1.3367_g	scaffold_6:1047668-1050084	40.805	118.196	1.53436	3.69e-05	yes	7811	IPR005828:General substrate transporter;;IPR007114:Major facilitator superfamily;;IPR003663:Sugar transporter;;IPR016196:MFS general substrate transporter;;IPR005829:Sugar transporter, conserved site	sp|A2QQV6|QUTD_ASPNC Probable quinate permease OS=Aspergillus niger (strain CBS 513.88 / FGSC A1513) GN=qutD PE=3 SV=1:309.686	5.3.1.4:L-arabinose isomerase.	KOG0254:Predicted transporter (major facilitator superfamily)	sugar:hydrogen symporter activity:GO:0005351;;L-arabinose isomerase activity:GO:0008733;;carbohydrate transport:GO:0008643;;transporter activity:GO:0005215;;integral to membrane:GO:0016021;;transport:GO:0006810;;membrane:GO:0016020	01.05.25 regulation of C-compound and carbohydrate metabolism N.crassa	20.01.03 C-compound and carbohydrate transport	20.09.18 cellular import	20.09.18.07 non-vesicular cellular import	34.11.12 perception of nutrients and nutritional adaptation N.crassa	20.03 transport facilities
estExt_Genemark1.C_60029	estExt_Genemark1.C_60029	estExt_Genemark1.C_60029	scaffold_6:105768-107402	8.85171	23.7061	1.42123	0.00449479	yes	24454	IPR013057:Amino acid transporter, transmembrane	sp|P38680|MTR_NEUCR N amino acid transport system protein OS=Neurospora crassa GN=mtr PE=3 SV=2:540.806	-	KOG1303:Amino acid transporters	-	20.01.07 amino acid/amino acid derivatives transport N.crassa	34.11.12 perception of nutrients and nutritional adaptation N.crassa
estExt_fgenesh1_pm.C_70285	estExt_fgenesh1_pm.C_70285	estExt_fgenesh1_pm.C_70285	scaffold_7:970812-972631	11.5678	28.2823	1.28978	0.00451181	yes	137001	IPR005828:General substrate transporter;;IPR007114:Major facilitator superfamily;;IPR016196:MFS general substrate transporter	sp|P07921|LACP_KLULA Lactose permease OS=Kluyveromyces lactis (strain ATCC 8585 / CBS 2359 / DSM 70799 / NBRC 1267 / NRRL Y-1140 / WM37) GN=LAC12 PE=3 SV=1:180.644	5.3.1.4:L-arabinose isomerase.	KOG0254:Predicted transporter (major facilitator superfamily)	L-arabinose isomerase activity:GO:0008733;;transporter activity:GO:0005215;;integral to membrane:GO:0016021;;transport:GO:0006810	20.01.03 C-compound and carbohydrate transport	20.09.18 cellular import	20.09.18.07 non-vesicular cellular import	20.03 transport facilities
estExt_Genemark1.C_1_t20301	estExt_Genemark1.C_1_t20301	estExt_Genemark1.C_1_t20301	scaffold_1:2930977-2932025	236.787	569.897	1.26711	0.00155108	yes	23456	IPR016482:Preprotein translocase Sec, Sec61-beta subunit, eukarya;;IPR005609:Preprotein translocase Sec, Sec61-beta subunit	sp|Q9HFC7|SC61B_YARLI Protein transport protein Sec61 subunit beta OS=Yarrowia lipolytica (strain CLIB 122 / E 150) GN=SBH1 PE=3 SV=1:119.013	-	KOG3457:Sec61 protein translocation complex, beta subunit	-	14.04 protein targeting, sorting and translocation N.crassa	20.01.10 protein transport	20.09.05 non-vesicular ER transport	20.03 transport facilities
estExt_Genewise1Plus.C_1_t60435	estExt_Genewise1Plus.C_1_t60435	estExt_Genewise1Plus.C_1_t60435	scaffold_1:3570857-3573106	110.934	266.845	1.2663	0.00296018	yes	95062	IPR005828:General substrate transporter;;IPR007114:Major facilitator superfamily;;IPR003663:Sugar transporter;;IPR016196:MFS general substrate transporter;;IPR005829:Sugar transporter, conserved site	sp|P53387|KHT2_KLULA Hexose transporter 2 OS=Kluyveromyces lactis (strain ATCC 8585 / CBS 2359 / DSM 70799 / NBRC 1267 / NRRL Y-1140 / WM37) GN=KHT2 PE=3 SV=1:435.647	5.3.1.4:L-arabinose isomerase.	KOG0254:Predicted transporter (major facilitator superfamily)	sugar:hydrogen symporter activity:GO:0005351;;L-arabinose isomerase activity:GO:0008733;;carbohydrate transport:GO:0008643;;transporter activity:GO:0005215;;integral to membrane:GO:0016021;;transport:GO:0006810;;membrane:GO:0016020	01.05 C-compound and carbohydrate metabolism	01.05.25 regulation of C-compound and carbohydrate metabolism N.crassa	20.01.03 C-compound and carbohydrate transport	20.01.03.01 sugar transport	20.01.13 lipid/fatty acid transport	20.09.16 cellular export and secretion	20.09.18 cellular import	20.09.18.07 non-vesicular cellular import	34.11.12 perception of nutrients and nutritional adaptation N.crassa	20.03 transport facilities
estExt_Genemark1.C_380027	estExt_Genemark1.C_380027	estExt_Genemark1.C_380027	scaffold_38:71608-73839	65.2631	136.798	1.06771	0.0099525	yes	26906	IPR007114:Major facilitator superfamily;;IPR011701:Major facilitator superfamily MFS-1;;IPR016196:MFS general substrate transporter	sp|O59814|YCT4_SCHPO Uncharacterized transporter C794.04c OS=Schizosaccharomyces pombe (strain ATCC 38366 / 972) GN=SPCC794.04c PE=2 SV=1:184.496	-	KOG0255:Synaptic vesicle transporter SVOP and related transporters (major facilitator superfamily)	transporter activity:GO:0005215;;integral to membrane:GO:0016021;;transport:GO:0006810
e_gw1.3.207.1	e_gw1.3.207.1	e_gw1.3.207.1	scaffold_3:1038680-1040435	123.963	60.2806	-1.04015	0.0055393	yes	73108	IPR007114:Major facilitator superfamily;;IPR011701:Major facilitator superfamily MFS-1;;IPR016196:MFS general substrate transporter	sp|Q9P6J0|YHDC_SCHPO Uncharacterized transporter C1683.12 OS=Schizosaccharomyces pombe (strain ATCC 38366 / 972) GN=SPBC1683.12 PE=2 SV=1:279.256	-	KOG2533:Permease of the major facilitator superfamily	transporter activity:GO:0005215;;integral to membrane:GO:0016021;;transport:GO:0006810	20.01.03 C-compound and carbohydrate transport	20.01.23 allantoin and allantoate transport	20.01.25 vitamine/cofactor transport	20.09.18 cellular import	20.09.18.07 non-vesicular cellular import	20.03 transport facilities
estExt_fgenesh1_pm.C_160169	estExt_fgenesh1_pm.C_160169	estExt_fgenesh1_pm.C_160169	scaffold_16:550798-555295	21.3063	9.94689	-1.09897	0.00495225	yes	138235	IPR001119:S-layer homology region;;IPR003593:AAA+ ATPase, core;;IPR011527:ABC transporter, transmembrane region, type 1;;IPR001140:ABC transporter, transmembrane region;;IPR003439:ABC transporter-like	sp|P53049|YOR1_YEAST Oligomycin resistance ATP-dependent permease YOR1 OS=Saccharomyces cerevisiae (strain ATCC 204508 / S288c) GN=YOR1 PE=1 SV=1:868.996	-	KOG0054:Multidrug resistance-associated protein/mitoxantrone resistance protein, ABC superfamily	nucleoside-triphosphatase activity:GO:0017111;;ATP binding:GO:0005524;;integral to membrane:GO:0016021;;ATPase activity:GO:0016887;;transport:GO:0006810;;nucleotide binding:GO:0000166;;ATPase activity, coupled to transmembrane movement of substances:GO:0042626	01.04 phosphate metabolism	20.01.01.07.08 organic anion transport	20.01.03 C-compound and carbohydrate transport	20.01.27 drug/toxin transport	20.09.13 vacuolar/lysosomal transport	32.05.01.03 chemical agent resistance	32.07.05 detoxification by export	34.11.03 chemoperception and response	16.01 protein binding	16.19 nucleotide/nucleoside/nucleobase binding	16.19.03 ATP binding	20.03 transport facilities	20.03.22 transport ATPases	20.03.25 ABC transporters
estExt_fgenesh2_kg.C_180071	estExt_fgenesh2_kg.C_180071	estExt_fgenesh2_kg.C_180071	scaffold_18:516788-518139	169.184	78.673	-1.10465	0.00979969	yes	124396	IPR005828:General substrate transporter;;IPR007114:Major facilitator superfamily;;IPR003663:Sugar transporter;;IPR016196:MFS general substrate transporter;;IPR005829:Sugar transporter, conserved site	sp|P49374|HGT1_KLULA High-affinity glucose transporter OS=Kluyveromyces lactis (strain ATCC 8585 / CBS 2359 / DSM 70799 / NBRC 1267 / NRRL Y-1140 / WM37) GN=HGT1 PE=3 SV=1:341.658	5.3.1.4:L-arabinose isomerase.	KOG0254:Predicted transporter (major facilitator superfamily)	sugar:hydrogen symporter activity:GO:0005351;;L-arabinose isomerase activity:GO:0008733;;carbohydrate transport:GO:0008643;;transporter activity:GO:0005215;;integral to membrane:GO:0016021;;transport:GO:0006810;;membrane:GO:0016020	20.01.03 C-compound and carbohydrate transport	20.09.18.07 non-vesicular cellular import
estExt_fgenesh1_pm.C_130181	estExt_fgenesh1_pm.C_130181	estExt_fgenesh1_pm.C_130181	scaffold_13:633759-635726	71.0919	32.9047	-1.11139	0.00427731	yes	137900	IPR001046:Natural resistance-associated macrophage protein	sp|P38925|SMF1_YEAST Manganese transporter SMF1 OS=Saccharomyces cerevisiae (strain ATCC 204508 / S288c) GN=SMF1 PE=1 SV=2:506.908	-	KOG1291:Mn2+ and Fe2+ transporters of the NRAMP family	transporter activity:GO:0005215;;transport:GO:0006810;;membrane:GO:0016020	10.03.01 mitotic cell cycle and cell cycle control N.crassa	14.04 protein targeting, sorting and translocation S.cerevisiae	20.01.01.01.01 heavy metal ion transport (Cu+, Fe3+, etc.) N.crassa	20.09.04 mitochondrial transport	20.09.18 cellular import	20.09.18.07 non-vesicular cellular import	34.01.01.01 homeostasis of metal ions (Na, K, Ca etc.) N.crassa
estExt_Genewise1Plus.C_1_t30045	estExt_Genewise1Plus.C_1_t30045	estExt_Genewise1Plus.C_1_t30045	scaffold_1:1378495-1380426	116.586	53.6441	-1.11991	0.00310191	yes	94212	IPR007114:Major facilitator superfamily;;IPR011701:Major facilitator superfamily MFS-1;;IPR016196:MFS general substrate transporter	sp|O74829|YN2F_SCHPO Uncharacterized MFS-type transporter C530.15c OS=Schizosaccharomyces pombe (strain ATCC 38366 / 972) GN=SPBC530.15c PE=1 SV=2:320.472	-	KOG0255:Synaptic vesicle transporter SVOP and related transporters (major facilitator superfamily)	transporter activity:GO:0005215;;integral to membrane:GO:0016021;;transport:GO:0006810	20.01.27 drug/toxin transport	32.05.01 resistance proteins	32.07.05 detoxification by export	20.03 transport facilities	20.03.02.03.01 proton driven antiporter
e_gw1.3.87.1	e_gw1.3.87.1	e_gw1.3.87.1	scaffold_3:1516473-1518374	199.284	89.2608	-1.15873	0.00322726	yes	72395	IPR008521:Protein of unknown function DUF803	sp|Q3SWX0|NIPA2_BOVIN Magnesium transporter NIPA2 OS=Bos taurus GN=NIPA2 PE=2 SV=1:258.07	-	KOG2922:Uncharacterized conserved protein	-
gm1.7978_g	gm1.7978_g	gm1.7978_g	scaffold_29:318087-321159	52.5692	23.4967	-1.16176	0.00195024	yes	12422	IPR007114:Major facilitator superfamily;;IPR011701:Major facilitator superfamily MFS-1;;IPR016196:MFS general substrate transporter	sp|O94343|YHMA_SCHPO Uncharacterized MFS-type transporter C1271.10c OS=Schizosaccharomyces pombe (strain ATCC 38366 / 972) GN=SPBC1271.10c PE=1 SV=1:114.39;;sp|O94343|YHMA_SCHPO Uncharacterized MFS-type transporter C1271.10c OS=Schizosaccharomyces pombe (strain ATCC 38366 / 972) GN=SPBC1271.10c PE=1 SV=1:88.9669	-	KOG0255:Synaptic vesicle transporter SVOP and related transporters (major facilitator superfamily)	transporter activity:GO:0005215;;integral to membrane:GO:0016021;;transport:GO:0006810	20.01.27 drug/toxin transport	20.03 transport facilities
estExt_Genewise1Plus.C_7_t20167	estExt_Genewise1Plus.C_7_t20167	estExt_Genewise1Plus.C_7_t20167	scaffold_7:832780-835898	116.917	50.8688	-1.20064	0.00154267	yes	98413	IPR006153:Sodium/hydrogen exchanger	sp|Q9P7I1|KHA1_SCHPO K(+)/H(+) antiporter 1 OS=Schizosaccharomyces pombe (strain ATCC 38366 / 972) GN=kha1 PE=2 SV=1:447.588	-	KOG1650:Predicted K+/H+-antiporter	solute:hydrogen antiporter activity:GO:0015299;;regulation of pH:GO:0006885;;integral to membrane:GO:0016021	20.01.01.01 cation transport (H+, Na+, K+, Ca2+ , NH4+, etc.) N.crassa	34.01.01.01 homeostasis of metal ions (Na, K, Ca etc.) N.crassa	34.01.01.03 homeostasis of protons
estExt_Genewise1Plus.C_4_t20387	estExt_Genewise1Plus.C_4_t20387	estExt_Genewise1Plus.C_4_t20387	scaffold_4:1078501-1083504	58.9565	25.2285	-1.2246	0.00083149	yes	97054	IPR006118:Recombinase, conserved site;;IPR003593:AAA+ ATPase, core;;IPR011527:ABC transporter, transmembrane region, type 1;;IPR001140:ABC transporter, transmembrane region;;IPR003439:ABC transporter-like	sp|P36619|PMD1_SCHPO Leptomycin B resistance protein pmd1 OS=Schizosaccharomyces pombe (strain ATCC 38366 / 972) GN=pmd1 PE=2 SV=2:776.163	-	KOG0055:Multidrug/pheromone exporter, ABC superfamily	nucleoside-triphosphatase activity:GO:0017111;;recombinase activity:GO:0000150;;integral to membrane:GO:0016021;;nucleotide binding:GO:0000166;;ATPase activity, coupled to transmembrane movement of substances:GO:0042626;;ATP binding:GO:0005524;;DNA recombination:GO:0006310;;transport:GO:0006810;;ATPase activity:GO:0016887	01.04 phosphate metabolism	20.01.01.01 cation transport (H+, Na+, K+, Ca2+ , NH4+, etc.)	20.01.03 C-compound and carbohydrate transport	20.01.09 peptide transport	20.01.27 drug/toxin transport	20.09.16 cellular export and secretion	20.09.16.01 Type I protein secretion system (ABC-type transport systems) N.crassa	32.05.01 resistance proteins	32.07.05 detoxification by export	34.11.03 chemoperception and response	34.11.03.07 pheromone response, mating-type determination, sex-specific proteins S.cerevisiae	16.19 nucleotide/nucleoside/nucleobase binding	16.19.03 ATP binding	20.03 transport facilities	20.03.22 transport ATPases	20.03.25 ABC transporters
estExt_Genemark1.C_50315	estExt_Genemark1.C_50315	estExt_Genemark1.C_50315	scaffold_5:1261850-1263869	66.0849	28.209	-1.22817	0.00156157	yes	24422	IPR007114:Major facilitator superfamily;;IPR011701:Major facilitator superfamily MFS-1;;IPR016196:MFS general substrate transporter	sp|Q9US44|YIZG_SCHPO Uncharacterized transporter C1002.16c OS=Schizosaccharomyces pombe (strain ATCC 38366 / 972) GN=SPAC1002.16c PE=2 SV=1:305.064	-	KOG2533:Permease of the major facilitator superfamily	transporter activity:GO:0005215;;integral to membrane:GO:0016021;;transport:GO:0006810	20.01.03 C-compound and carbohydrate transport	20.01.23 allantoin and allantoate transport	20.01.25 vitamine/cofactor transport	20.09.18 cellular import	20.09.18.07 non-vesicular cellular import	20.03 transport facilities
e_gw1.12.6.1	e_gw1.12.6.1	e_gw1.12.6.1	scaffold_12:134694-136548	16.8417	6.78304	-1.31203	0.00793499	yes	82104	IPR001411:Tetracycline resistance protein, TetB;;IPR007114:Major facilitator superfamily;;IPR011701:Major facilitator superfamily MFS-1;;IPR016196:MFS general substrate transporter	sp|Q10072|YAN6_SCHPO Uncharacterized transporter C3H1.06c OS=Schizosaccharomyces pombe (strain ATCC 38366 / 972) GN=SPAC3H1.06c PE=2 SV=1:301.597	-	KOG0254:Predicted transporter (major facilitator superfamily)	tetracycline:hydrogen antiporter activity:GO:0015520;;transporter activity:GO:0005215;;integral to membrane:GO:0016021;;transport:GO:0006810;;response to antibiotic:GO:0046677;;tetracycline transport:GO:0015904	20.01.27 drug/toxin transport	20.09.16 cellular export and secretion	32.05.01 resistance proteins	32.07.05 detoxification by export
gm1.1349_g	gm1.1349_g	gm1.1349_g	scaffold_2:1238251-1240791	24.3035	9.72945	-1.32074	0.00404779	yes	5793	IPR003593:AAA+ ATPase, core;;IPR003439:ABC transporter-like	sp|Q66H39|ABCF3_RAT ATP-binding cassette sub-family F member 3 OS=Rattus norvegicus GN=Abcf3 PE=2 SV=1:54.6842;;sp|Q66H39|ABCF3_RAT ATP-binding cassette sub-family F member 3 OS=Rattus norvegicus GN=Abcf3 PE=2 SV=1:67.3958;;sp|Q66H39|ABCF3_RAT ATP-binding cassette sub-family F member 3 OS=Rattus norvegicus GN=Abcf3 PE=2 SV=1:248.054	-	KOG0062:ATPase component of ABC transporters with duplicated ATPase domains/Translation elongation factor EF-3b	nucleoside-triphosphatase activity:GO:0017111;;ATP binding:GO:0005524;;ATPase activity:GO:0016887;;nucleotide binding:GO:0000166	12.07 translational control	32.01.11 nutrient starvation response	16.19.03 ATP binding	18.02.01.01 enzyme activator	20.03.25 ABC transporters
estExt_Genewise1.C_370038	estExt_Genewise1.C_370038	estExt_Genewise1.C_370038	scaffold_37:48985-51215	64.7835	25.0486	-1.3709	0.000257226	yes	116350	IPR007114:Major facilitator superfamily;;IPR011701:Major facilitator superfamily MFS-1;;IPR016196:MFS general substrate transporter	sp|Q07904|THI73_YEAST Thiamine pathway transporter THI73 OS=Saccharomyces cerevisiae (strain ATCC 204508 / S288c) GN=THI73 PE=1 SV=1:304.679	-	KOG2533:Permease of the major facilitator superfamily	transporter activity:GO:0005215;;integral to membrane:GO:0016021;;transport:GO:0006810	20.01.23 allantoin and allantoate transport	20.09.18 cellular import	20.09.18.07 non-vesicular cellular import	20.03 transport facilities
e_gw1.2.497.1	e_gw1.2.497.1	e_gw1.2.497.1	scaffold_2:947125-949712	33.7869	12.9595	-1.38246	0.000444367	yes	71664	IPR004813:Oligopeptide transporter OPT superfamily;;IPR004648:Tetrapeptide transporter, OPT1/isp4	sp|O14031|OPT_SCHPO Uncharacterized oligopeptide transporter C29B12.10c OS=Schizosaccharomyces pombe (strain ATCC 38366 / 972) GN=SPAC29B12.10c PE=1 SV=1:589.341	-	KOG2262:Sexual differentiation process protein ISP4	-	34.11.03.07 pheromone response, mating-type determination, sex-specific proteins N.crassa
e_gw1.7.9.1	e_gw1.7.9.1	e_gw1.7.9.1	scaffold_7:255302-259783	18.9498	7.12025	-1.41218	0.000321694	yes	78645	IPR003593:AAA+ ATPase, core;;IPR010929:CDR ABC transporter;;IPR013525:ABC-2 type transporter;;IPR003439:ABC transporter-like	sp|Q55DQ2|ABCGB_DICDI ABC transporter G family member 11 OS=Dictyostelium discoideum GN=abcG11 PE=3 SV=1:993.416	-	KOG0065:Pleiotropic drug resistance proteins (PDR1-15), ABC superfamily	nucleoside-triphosphatase activity:GO:0017111;;ATP binding:GO:0005524;;integral to membrane:GO:0016021;;transport:GO:0006810;;ATPase activity:GO:0016887;;ATPase activity, coupled to transmembrane movement of substances:GO:0042626;;nucleotide binding:GO:0000166	01.04 phosphate metabolism	01.05 C-compound and carbohydrate metabolism	20.01.01.01 cation transport (H+, Na+, K+, Ca2+ , NH4+, etc.) S.cerevisiae	20.01.03 C-compound and carbohydrate transport	20.01.13 lipid/fatty acid transport	20.01.27 drug/toxin transport	20.09.16.01 Type I protein secretion system (ABC-type transport systems) N.crassa	32.01.01 oxidative stress response	32.05.01.03 chemical agent resistance	32.07 detoxification	32.07.05 detoxification by export	34.01.01.01 homeostasis of metal ions (Na, K, Ca etc.) S.cerevisiae	16.19.03 ATP binding	20.03.22 transport ATPases	20.03.25 ABC transporters
estExt_Genewise1Plus.C_390082	estExt_Genewise1Plus.C_390082	estExt_Genewise1Plus.C_390082	scaffold_39:83896-88507	23.2459	8.52965	-1.44642	0.00011875	yes	104881	IPR003593:AAA+ ATPase, core;;IPR010929:CDR ABC transporter;;IPR013525:ABC-2 type transporter;;IPR003439:ABC transporter-like	sp|P41820|BFR1_SCHPO Brefeldin A resistance protein OS=Schizosaccharomyces pombe (strain ATCC 38366 / 972) GN=bfr1 PE=1 SV=1:1140.95	-	KOG0065:Pleiotropic drug resistance proteins (PDR1-15), ABC superfamily	nucleoside-triphosphatase activity:GO:0017111;;ATP binding:GO:0005524;;integral to membrane:GO:0016021;;transport:GO:0006810;;ATPase activity:GO:0016887;;ATPase activity, coupled to transmembrane movement of substances:GO:0042626;;nucleotide binding:GO:0000166	01.04 phosphate metabolism	01.05 C-compound and carbohydrate metabolism	20.01.01.01 cation transport (H+, Na+, K+, Ca2+ , NH4+, etc.) S.cerevisiae	20.01.03 C-compound and carbohydrate transport	20.01.13 lipid/fatty acid transport	20.01.27 drug/toxin transport	20.09.16.01 Type I protein secretion system (ABC-type transport systems) N.crassa	32.01.01 oxidative stress response	32.05.01.03 chemical agent resistance	32.07 detoxification	32.07.05 detoxification by export	34.01.01.01 homeostasis of metal ions (Na, K, Ca etc.) S.cerevisiae	16.19.03 ATP binding	20.03.22 transport ATPases	20.03.25 ABC transporters
e_gw1.12.440.1	e_gw1.12.440.1	e_gw1.12.440.1	scaffold_12:613433-618187	98.4166	36.0747	-1.44792	0.000172087	yes	82343	IPR001757:ATPase, P-type, K/Mg/Cd/Cu/Zn/Na/Ca/Na/H-transporter;;IPR005834:Haloacid dehalogenase-like hydrolase;;IPR006539:Phospholipid-translocating P-type ATPase, flippase	sp|P32660|ATC5_YEAST Phospholipid-transporting ATPase DNF1 OS=Saccharomyces cerevisiae (strain ATCC 204508 / S288c) GN=DNF1 PE=1 SV=2:1446.8	3.6.3.1:Magnesium-ATPase.	KOG0206:P-type ATPase	integral to membrane:GO:0016021;;ATPase activity, coupled to transmembrane movement of ions, phosphorylative mechanism:GO:0015662;;phospholipid transport:GO:0015914;;membrane:GO:0016020;;ATP binding:GO:0005524;;metabolic process:GO:0008152;;magnesium ion binding:GO:0000287;;phospholipid-translocating ATPase activity:GO:0004012;;catalytic activity:GO:0003824;;transport:GO:0006810	20.01.09 peptide transport	20.01.10 protein transport	20.01.13 lipid/fatty acid transport	20.03.22 transport ATPases
estExt_fgenesh1_pm.C_250020	estExt_fgenesh1_pm.C_250020	estExt_fgenesh1_pm.C_250020	scaffold_25:64108-69659	52.5306	18.9944	-1.46758	6.31e-05	yes	138878	IPR016040:NAD(P)-binding;;IPR007114:Major facilitator superfamily;;IPR011701:Major facilitator superfamily MFS-1;;IPR001509:NAD-dependent epimerase/dehydratase;;IPR016196:MFS general substrate transporter	sp|O94491|YC7A_SCHPO Uncharacterized transporter C417.10 OS=Schizosaccharomyces pombe (strain ATCC 38366 / 972) GN=SPCC417.10 PE=2 SV=1:287.73	-	KOG2533:Permease of the major facilitator superfamily	metabolic process:GO:0008152;;coenzyme binding:GO:0050662;;transporter activity:GO:0005215;;integral to membrane:GO:0016021;;cellular metabolic process:GO:0044237;;catalytic activity:GO:0003824;;binding:GO:0005488;;transport:GO:0006810	20.01.23 allantoin and allantoate transport	20.09.18 cellular import	20.09.18.07 non-vesicular cellular import	20.03 transport facilities
estExt_Genewise1Plus.C_19_t10255	estExt_Genewise1Plus.C_19_t10255	estExt_Genewise1Plus.C_19_t10255	scaffold_19:316765-317896	401.52	141.667	-1.50297	4.42e-05	yes	102402	IPR000425:Major intrinsic protein	sp|P47862|AQP3_RAT Aquaporin-3 OS=Rattus norvegicus GN=Aqp3 PE=2 SV=1:105.145	-	KOG0224:Aquaporin (major intrinsic protein family)	transporter activity:GO:0005215;;transport:GO:0006810;;membrane:GO:0016020
estExt_Genewise1Plus.C_7_t20161	estExt_Genewise1Plus.C_7_t20161	estExt_Genewise1Plus.C_7_t20161	scaffold_7:822494-824456	34.3991	12.129	-1.50391	0.000836781	yes	98410	IPR005828:General substrate transporter;;IPR007114:Major facilitator superfamily;;IPR004738:Phosphate permease;;IPR016196:MFS general substrate transporter;;IPR005829:Sugar transporter, conserved site	sp|P25297|PHO84_YEAST Inorganic phosphate transporter PHO84 OS=Saccharomyces cerevisiae (strain ATCC 204508 / S288c) GN=PHO84 PE=1 SV=2:594.349	-	KOG0252:Inorganic phosphate transporter	phosphate transport:GO:0006817;;transporter activity:GO:0005215;;inorganic phosphate transmembrane transporter activity:GO:0005315;;integral to membrane:GO:0016021;;transport:GO:0006810;;membrane:GO:0016020	01.04 phosphate metabolism	20.01.01.01.01 heavy metal ion transport (Cu+, Fe3+, etc.) S.cerevisiae	20.01.01.07 anion transport	20.01.01.07.07 phosphate transport	20.01.03 C-compound and carbohydrate transport	20.09.18 cellular import	34.01.01.03 homeostasis of protons	34.01.03.03 homeostasis of phosphate	20.03 transport facilities
e_gw1.1.1838.1	e_gw1.1.1838.1	e_gw1.1.1838.1	scaffold_1:3374927-3376682	26.1912	8.94529	-1.54988	0.000718677	yes	68698	IPR007114:Major facilitator superfamily;;IPR011701:Major facilitator superfamily MFS-1;;IPR016196:MFS general substrate transporter	sp|O43081|YHS6_SCHPO Uncharacterized MFS-type transporter C947.06c OS=Schizosaccharomyces pombe (strain ATCC 38366 / 972) GN=SPBC947.06c PE=2 SV=1:402.905	-	KOG0255:Synaptic vesicle transporter SVOP and related transporters (major facilitator superfamily)	transporter activity:GO:0005215;;integral to membrane:GO:0016021;;transport:GO:0006810	20.01.11 amine / polyamine transport	20.01.27 drug/toxin transport	20.09.16 cellular export and secretion	32.05.01 resistance proteins	32.07 detoxification	32.07.05 detoxification by export	20.03 transport facilities
fgenesh1_pg.20_#_28	fgenesh1_pg.20_#_28	fgenesh1_pg.20_#_28	scaffold_20:99609-101611	52.9096	17.4597	-1.5995	4.42e-05	yes	37895	IPR011701:Major facilitator superfamily MFS-1;;IPR016196:MFS general substrate transporter	sp|Q870L2|MIRB_EMENI Siderophore iron transporter mirB OS=Emericella nidulans GN=mirB PE=3 SV=1:485.337	-	KOG0254:Predicted transporter (major facilitator superfamily)	-	20.01.01.01.01.01 siderophore-iron transport	20.09.18.07 non-vesicular cellular import	34.01.01.01 homeostasis of metal ions (Na, K, Ca etc.) N.crassa
e_gw1.15.119.1	e_gw1.15.119.1	e_gw1.15.119.1	scaffold_15:722578-724310	49.0109	15.9694	-1.61779	8.98e-05	yes	84399	IPR007114:Major facilitator superfamily;;IPR011701:Major facilitator superfamily MFS-1;;IPR016196:MFS general substrate transporter	sp|O74923|YJ7D_SCHPO Uncharacterized transporter C757.13 OS=Schizosaccharomyces pombe (strain ATCC 38366 / 972) GN=SPCC757.13 PE=2 SV=1:318.161	-	KOG2533:Permease of the major facilitator superfamily	transporter activity:GO:0005215;;integral to membrane:GO:0016021;;transport:GO:0006810
e_gw1.35.113.1	e_gw1.35.113.1	e_gw1.35.113.1	scaffold_35:56039-57182	560.264	179.285	-1.64385	4.47e-05	yes	91910	IPR003689:Zinc/iron permease;;IPR004698:Zinc/iron permease, fungal and plant	sp|P32804|ZRT1_YEAST Zinc-regulated transporter 1 OS=Saccharomyces cerevisiae (strain ATCC 204508 / S288c) GN=ZRT1 PE=2 SV=1:406.371	-	KOG1558:Fe2+/Zn2+ regulated transporter	integral to membrane:GO:0016021;;metal ion transmembrane transporter activity:GO:0046873;;zinc ion transport:GO:0006829;;membrane:GO:0016020;;zinc ion transmembrane transporter activity:GO:0005385;;metal ion transport:GO:0030001	20.01.01.01.01 heavy metal ion transport (Cu+, Fe3+, etc.) N.crassa	20.09.18.07 non-vesicular cellular import	34.01.01.01 homeostasis of metal ions (Na, K, Ca etc.) N.crassa
e_gw1.30.209.1	e_gw1.30.209.1	e_gw1.30.209.1	scaffold_30:19326-21006	33.615	10.6284	-1.66118	0.000229669	yes	90719	IPR007114:Major facilitator superfamily;;IPR011701:Major facilitator superfamily MFS-1;;IPR016196:MFS general substrate transporter	sp|Q9US44|YIZG_SCHPO Uncharacterized transporter C1002.16c OS=Schizosaccharomyces pombe (strain ATCC 38366 / 972) GN=SPAC1002.16c PE=2 SV=1:217.238	-	KOG2533:Permease of the major facilitator superfamily	transporter activity:GO:0005215;;integral to membrane:GO:0016021;;transport:GO:0006810	20.01.03 C-compound and carbohydrate transport	20.01.23 allantoin and allantoate transport	20.01.25 vitamine/cofactor transport	20.09.18 cellular import	20.09.18.07 non-vesicular cellular import	20.03 transport facilities
e_gw1.5.615.1	e_gw1.5.615.1	e_gw1.5.615.1	scaffold_5:130123-131807	11.1041	3.50293	-1.66445	0.00248825	yes	75778	IPR001411:Tetracycline resistance protein, TetB;;IPR007114:Major facilitator superfamily;;IPR011701:Major facilitator superfamily MFS-1;;IPR016196:MFS general substrate transporter	sp|Q00357|TOXA_COCCA Putative HC-toxin efflux carrier TOXA OS=Cochliobolus carbonum GN=TOXA PE=3 SV=1:311.612	-	KOG0254:Predicted transporter (major facilitator superfamily)	tetracycline:hydrogen antiporter activity:GO:0015520;;transporter activity:GO:0005215;;integral to membrane:GO:0016021;;transport:GO:0006810;;response to antibiotic:GO:0046677;;tetracycline transport:GO:0015904	20.01.27 drug/toxin transport	20.09.16 cellular export and secretion	20.09.16.01 Type I protein secretion system (ABC-type transport systems) N.crassa	32.05.01 resistance proteins	32.07 detoxification	32.07.05 detoxification by export	20.03 transport facilities	20.03.25 ABC transporters
estExt_Genewise1Plus.C_5_t10234	estExt_Genewise1Plus.C_5_t10234	estExt_Genewise1Plus.C_5_t10234	scaffold_5:262136-264409	45.4413	13.8113	-1.71816	1.99e-05	yes	97298	IPR002293:Amino acid/polyamine transporter I;;IPR004841:Amino acid permease-associated region;;IPR004840:Amino acid permease, conserved site	sp|Q9C0V0|YQD2_SCHPO Probable amino-acid permease PB1C11.02 OS=Schizosaccharomyces pombe (strain ATCC 38366 / 972) GN=SPCPB1C11.02 PE=2 SV=1:491.115	-	KOG1286:Amino acid transporters	amino acid transmembrane transporter activity:GO:0015171;;integral to membrane:GO:0016021;;transport:GO:0006810;;membrane:GO:0016020;;amino acid transport:GO:0006865	01.06 lipid, fatty acid and isoprenoid metabolism S.cerevisiae	20.01.01.01.01 heavy metal ion transport (Cu+, Fe3+, etc.) S.cerevisiae	20.01.03 C-compound and carbohydrate transport	20.01.07 amino acid/amino acid derivatives transport L.innocua	20.01.13 lipid/fatty acid transport	20.01.25 vitamine/cofactor transport	20.09.04 mitochondrial transport	20.09.16 cellular export and secretion	20.09.18 cellular import	20.09.18.07 non-vesicular cellular import	32.01.03 osmotic and salt stress response	34.01.01.01 homeostasis of metal ions (Na, K, Ca etc.) S.cerevisiae	34.11.03.13 osmosensing	20.03 transport facilities
e_gw1.30.37.1	e_gw1.30.37.1	e_gw1.30.37.1	scaffold_30:114811-116370	27.6528	8.27882	-1.73993	0.000297169	yes	90843	IPR007114:Major facilitator superfamily;;IPR011701:Major facilitator superfamily MFS-1;;IPR016196:MFS general substrate transporter;;IPR006162:Phosphopantetheine attachment site	sp|P53918|ESBP6_YEAST Uncharacterized transporter ESBP6 OS=Saccharomyces cerevisiae (strain ATCC 204508 / S288c) GN=ESBP6 PE=1 SV=1:101.293	-	KOG2504:Monocarboxylate transporter	phosphopantetheine binding:GO:0031177;;transporter activity:GO:0005215;;integral to membrane:GO:0016021;;transport:GO:0006810	20.01.03 C-compound and carbohydrate transport	20.09.18 cellular import
e_gw1.26.63.1	e_gw1.26.63.1	e_gw1.26.63.1	scaffold_26:104672-106507	13.7384	4.06368	-1.75735	0.000645573	yes	89596	IPR007114:Major facilitator superfamily;;IPR011701:Major facilitator superfamily MFS-1;;IPR016196:MFS general substrate transporter	sp|O13880|VHT1_SCHPO Vitamin H transporter 1 OS=Schizosaccharomyces pombe (strain ATCC 38366 / 972) GN=vht1 PE=2 SV=1:368.622	-	KOG2533:Permease of the major facilitator superfamily	transporter activity:GO:0005215;;integral to membrane:GO:0016021;;transport:GO:0006810
e_gw1.29.56.1	e_gw1.29.56.1	e_gw1.29.56.1	scaffold_29:51798-53584	283.673	83.8432	-1.75846	3.16e-06	yes	90646	IPR007114:Major facilitator superfamily;;IPR011701:Major facilitator superfamily MFS-1;;IPR016196:MFS general substrate transporter	sp|P25351|YCR3_YEAST Uncharacterized membrane protein YCR023C OS=Saccharomyces cerevisiae (strain ATCC 204508 / S288c) GN=YCR023C PE=1 SV=2:242.662	-	KOG2615:Permease of the major facilitator superfamily	transporter activity:GO:0005215;;integral to membrane:GO:0016021;;transport:GO:0006810	32.07 detoxification	20.03 transport facilities
estExt_Genewise1Plus.C_18_t10099	estExt_Genewise1Plus.C_18_t10099	estExt_Genewise1Plus.C_18_t10099	scaffold_18:97614-102133	67.6442	19.3412	-1.80629	3.35e-07	yes	102083	IPR001849:Pleckstrin-like;;IPR000904:SEC7-like	sp|O13817|SEC7C_SCHPO Protein transport protein sec73 OS=Schizosaccharomyces pombe (strain ATCC 38366 / 972) GN=sec73 PE=2 SV=2:298.901	-	KOG0929:Guanine nucleotide exchange factor	ARF guanyl-nucleotide exchange factor activity:GO:0005086;;regulation of ARF protein signal transduction:GO:0032012;;intracellular:GO:0005622	20.09.07 vesicular transport (Golgi network, etc.) N.crassa
e_gw1.20.201.1	e_gw1.20.201.1	e_gw1.20.201.1	scaffold_20:105172-109435	12.6155	3.60468	-1.80726	2.77e-05	yes	86938	IPR003593:AAA+ ATPase, core;;IPR011527:ABC transporter, transmembrane region, type 1;;IPR001140:ABC transporter, transmembrane region;;IPR003439:ABC transporter-like	sp|P36619|PMD1_SCHPO Leptomycin B resistance protein pmd1 OS=Schizosaccharomyces pombe (strain ATCC 38366 / 972) GN=pmd1 PE=2 SV=2:792.727;;sp|P36619|PMD1_SCHPO Leptomycin B resistance protein pmd1 OS=Schizosaccharomyces pombe (strain ATCC 38366 / 972) GN=pmd1 PE=2 SV=2:231.106	-	KOG0055:Multidrug/pheromone exporter, ABC superfamily	nucleoside-triphosphatase activity:GO:0017111;;ATP binding:GO:0005524;;integral to membrane:GO:0016021;;ATPase activity:GO:0016887;;transport:GO:0006810;;nucleotide binding:GO:0000166;;ATPase activity, coupled to transmembrane movement of substances:GO:0042626	01.04 phosphate metabolism	20.01.01.07.07 phosphate transport	32.05.01 resistance proteins	34.01.03.03 homeostasis of phosphate	20.03 transport facilities	20.03.25 ABC transporters
estExt_fgenesh1_pg.C_390032	estExt_fgenesh1_pg.C_390032	estExt_fgenesh1_pg.C_390032	scaffold_39:105982-107165	15.3759	4.35828	-1.81884	0.000802593	yes	143256	IPR000425:Major intrinsic protein	sp|P0CD92|AQY1_YEASX Aquaporin-1 OS=Saccharomyces cerevisiae GN=AQY1 PE=2 SV=1:191.045	-	KOG0223:Aquaporin (major intrinsic protein family)	transporter activity:GO:0005215;;transport:GO:0006810;;membrane:GO:0016020	20.09.18.07 non-vesicular cellular import	20.03 transport facilities	20.03.01 channel / pore class transport	20.03.01.01 ion channels
gm1.4479_g	gm1.4479_g	gm1.4479_g	scaffold_10:57201-59347	100.75	28.3914	-1.82726	4.97e-07	yes	8923	IPR005828:General substrate transporter;;IPR007114:Major facilitator superfamily;;IPR003663:Sugar transporter;;IPR016196:MFS general substrate transporter;;IPR005829:Sugar transporter, conserved site	sp|P15325|QUTD_EMENI Quinate permease OS=Emericella nidulans GN=qutD PE=1 SV=2:271.937	5.3.1.4:L-arabinose isomerase.	KOG0254:Predicted transporter (major facilitator superfamily)	sugar:hydrogen symporter activity:GO:0005351;;L-arabinose isomerase activity:GO:0008733;;carbohydrate transport:GO:0008643;;transporter activity:GO:0005215;;integral to membrane:GO:0016021;;transport:GO:0006810;;membrane:GO:0016020	01.05 C-compound and carbohydrate metabolism	01.05.25 regulation of C-compound and carbohydrate metabolism N.crassa	20.01.03 C-compound and carbohydrate transport	20.01.03.01 sugar transport	20.09.16 cellular export and secretion	20.09.18 cellular import	20.09.18.07 non-vesicular cellular import	34.01.01.03 homeostasis of protons	34.11.12 perception of nutrients and nutritional adaptation N.crassa	20.03 transport facilities	20.03.02.02.01 proton driven symporter
fgenesh1_pm.1_#_32	fgenesh1_pm.1_#_32	fgenesh1_pm.1_#_32	scaffold_1:119300-120164	22.1353	6.0811	-1.86394	0.000645573	yes	125618	IPR003593:AAA+ ATPase, core;;IPR003439:ABC transporter-like	sp|Q7Z991|YE31_SCHPO Uncharacterized ABC transporter ATP-binding protein C20G4.01 OS=Schizosaccharomyces pombe (strain ATCC 38366 / 972) GN=SPAC20G4.01 PE=4 SV=2:254.603	-	KOG2355:Predicted ABC-type transport, ATPase component/CCR4 associated factor	nucleoside-triphosphatase activity:GO:0017111;;ATP binding:GO:0005524;;ATPase activity:GO:0016887;;nucleotide binding:GO:0000166	01.04 phosphate metabolism	11.02.03.04 transcriptional control	16.19.03 ATP binding	20.03.25 ABC transporters
fgenesh1_pg.39_#_19	fgenesh1_pg.39_#_19	fgenesh1_pg.39_#_19	scaffold_39:58940-60586	26.3501	7.02497	-1.90725	4.78e-05	yes	39653	IPR007114:Major facilitator superfamily;;IPR011701:Major facilitator superfamily MFS-1;;IPR016196:MFS general substrate transporter	sp|O43000|LIZ1_SCHPO Pantothenate transporter liz1 OS=Schizosaccharomyces pombe (strain ATCC 38366 / 972) GN=liz1 PE=2 SV=2:401.749	-	KOG2533:Permease of the major facilitator superfamily	transporter activity:GO:0005215;;integral to membrane:GO:0016021;;transport:GO:0006810	01.02.07 regulation of nitrogen, sulfur and selenium metabolism S.cerevisiae	01.05.25 regulation of C-compound and carbohydrate metabolism S.cerevisiae	01.06.10 regulation of lipid, fatty acid and isoprenoid metabolism S.cerevisiae	10.03.01 mitotic cell cycle and cell cycle control N.crassa	10.03.03 cytokinesis (cell division) /septum formation and hydrolysis N.crassa	20.01.03 C-compound and carbohydrate transport	20.01.25 vitamine/cofactor transport	20.09.18.09.01 endocytosis
estExt_Genemark1.C_270027	estExt_Genemark1.C_270027	estExt_Genemark1.C_270027	scaffold_27:99023-101058	20.3691	5.25974	-1.95332	3.46e-05	yes	26543	IPR013057:Amino acid transporter, transmembrane	sp|P38680|MTR_NEUCR N amino acid transport system protein OS=Neurospora crassa GN=mtr PE=3 SV=2:63.1586	-	KOG1303:Amino acid transporters	-
e_gw1.19.84.1	e_gw1.19.84.1	e_gw1.19.84.1	scaffold_19:260013-261687	51.1975	13.163	-1.95959	7.28e-07	yes	86271	IPR002293:Amino acid/polyamine transporter I;;IPR004841:Amino acid permease-associated region;;IPR004840:Amino acid permease, conserved site	sp|Q9URZ3|PUT4_SCHPO Probable proline-specific permease put4 OS=Schizosaccharomyces pombe (strain ATCC 38366 / 972) GN=put4 PE=2 SV=1:436.417	-	KOG1286:Amino acid transporters	amino acid transmembrane transporter activity:GO:0015171;;integral to membrane:GO:0016021;;transport:GO:0006810;;membrane:GO:0016020;;amino acid transport:GO:0006865	01.06 lipid, fatty acid and isoprenoid metabolism S.cerevisiae	20.01.01.01.01 heavy metal ion transport (Cu+, Fe3+, etc.) S.cerevisiae	20.01.03 C-compound and carbohydrate transport	20.01.07 amino acid/amino acid derivatives transport N.crassa	20.01.13 lipid/fatty acid transport	20.01.25 vitamine/cofactor transport	20.09.04 mitochondrial transport	20.09.16 cellular export and secretion	20.09.18 cellular import	20.09.18.07 non-vesicular cellular import	32.01.03 osmotic and salt stress response	34.01.01.01 homeostasis of metal ions (Na, K, Ca etc.) S.cerevisiae	34.11.03.13 osmosensing	20.03 transport facilities
estExt_Genewise1.C_200430	estExt_Genewise1.C_200430	estExt_Genewise1.C_200430	scaffold_20:552875-557310	109.241	27.981	-1.965	1.33e-07	yes	114328	IPR003593:AAA+ ATPase, core;;IPR011527:ABC transporter, transmembrane region, type 1;;IPR001140:ABC transporter, transmembrane region;;IPR003439:ABC transporter-like	sp|P36619|PMD1_SCHPO Leptomycin B resistance protein pmd1 OS=Schizosaccharomyces pombe (strain ATCC 38366 / 972) GN=pmd1 PE=2 SV=2:1200.65	-	KOG0055:Multidrug/pheromone exporter, ABC superfamily	nucleoside-triphosphatase activity:GO:0017111;;ATP binding:GO:0005524;;integral to membrane:GO:0016021;;ATPase activity:GO:0016887;;transport:GO:0006810;;nucleotide binding:GO:0000166;;ATPase activity, coupled to transmembrane movement of substances:GO:0042626	01.04 phosphate metabolism	20.01.01.01 cation transport (H+, Na+, K+, Ca2+ , NH4+, etc.)	20.01.03 C-compound and carbohydrate transport	20.01.27 drug/toxin transport	20.09.16 cellular export and secretion	20.09.16.01 Type I protein secretion system (ABC-type transport systems) N.crassa	32.05.01 resistance proteins	32.07.05 detoxification by export	34.11.03 chemoperception and response	16.19 nucleotide/nucleoside/nucleobase binding	16.19.03 ATP binding	20.03 transport facilities	20.03.22 transport ATPases	20.03.25 ABC transporters
gw1.9.425.1	gw1.9.425.1	gw1.9.425.1	scaffold_9:822183-823347	19.0567	4.86164	-1.97078	0.000196857	yes	52104	IPR011701:Major facilitator superfamily MFS-1;;IPR016196:MFS general substrate transporter	sp|Q6ZSM3|MOT12_HUMAN Monocarboxylate transporter 12 OS=Homo sapiens GN=SLC16A12 PE=2 SV=2:76.2554	-	KOG2504:Monocarboxylate transporter	-	20.01.03 C-compound and carbohydrate transport	20.09.18 cellular import
estExt_Genewise1Plus.C_300100	estExt_Genewise1Plus.C_300100	estExt_Genewise1Plus.C_300100	scaffold_30:95968-97660	390.091	97.377	-2.00216	7.36e-08	yes	104234	IPR007114:Major facilitator superfamily;;IPR011701:Major facilitator superfamily MFS-1;;IPR016196:MFS general substrate transporter	sp|O94342|YHM9_SCHPO Probable metabolite transport protein C1271.09 OS=Schizosaccharomyces pombe (strain ATCC 38366 / 972) GN=SPBC1271.09 PE=2 SV=1:392.504	-	KOG0252:Inorganic phosphate transporter	transporter activity:GO:0005215;;integral to membrane:GO:0016021;;transport:GO:0006810	20.01.13 lipid/fatty acid transport
estExt_Genewise1.C_9_t10255	estExt_Genewise1.C_9_t10255	estExt_Genewise1.C_9_t10255	scaffold_9:304992-307576	412.431	99.3348	-2.05378	4.56e-07	yes	110883	IPR005828:General substrate transporter;;IPR007114:Major facilitator superfamily;;IPR016196:MFS general substrate transporter	sp|Q8GSD9|PHT12_ORYSJ Inorganic phosphate transporter 1-2 OS=Oryza sativa subsp. japonica GN=PTH1-2 PE=2 SV=1:169.859	-	KOG0252:Inorganic phosphate transporter	transporter activity:GO:0005215;;integral to membrane:GO:0016021;;transport:GO:0006810
e_gw1.16.135.1	e_gw1.16.135.1	e_gw1.16.135.1	scaffold_16:14458-16184	21.7378	4.56339	-2.25203	1.6e-06	yes	84853	IPR007114:Major facilitator superfamily;;IPR011701:Major facilitator superfamily MFS-1;;IPR016196:MFS general substrate transporter	sp|Q9P6J7|YHD3_SCHPO Uncharacterized MFS-type transporter C1683.03c OS=Schizosaccharomyces pombe (strain ATCC 38366 / 972) GN=SPBC1683.03c PE=2 SV=1:205.682	-	KOG0254:Predicted transporter (major facilitator superfamily)	transporter activity:GO:0005215;;integral to membrane:GO:0016021;;transport:GO:0006810	20.01.27 drug/toxin transport	32.07 detoxification
fgenesh1_pm.13_#_166	fgenesh1_pm.13_#_166	fgenesh1_pm.13_#_166	scaffold_13:577336-579274	221.698	44.0368	-2.33182	2.58e-11	yes	131359	IPR001411:Tetracycline resistance protein, TetB;;IPR007114:Major facilitator superfamily;;IPR011701:Major facilitator superfamily MFS-1;;IPR016196:MFS general substrate transporter	sp|Q00357|TOXA_COCCA Putative HC-toxin efflux carrier TOXA OS=Cochliobolus carbonum GN=TOXA PE=3 SV=1:271.937	-	KOG0254:Predicted transporter (major facilitator superfamily)	tetracycline:hydrogen antiporter activity:GO:0015520;;transporter activity:GO:0005215;;integral to membrane:GO:0016021;;transport:GO:0006810;;response to antibiotic:GO:0046677;;tetracycline transport:GO:0015904	20.01.27 drug/toxin transport	20.09.16.01 Type I protein secretion system (ABC-type transport systems) N.crassa	32.05.01 resistance proteins	32.07.05 detoxification by export	20.03.25 ABC transporters
fgenesh1_pm.3_#_257	fgenesh1_pm.3_#_257	fgenesh1_pm.3_#_257	scaffold_3:835412-840233	14.0448	2.75867	-2.348	1.38e-08	yes	127668	IPR003593:AAA+ ATPase, core;;IPR011527:ABC transporter, transmembrane region, type 1;;IPR001140:ABC transporter, transmembrane region;;IPR003439:ABC transporter-like	sp|P32386|YBT1_YEAST ATP-dependent bile acid permease OS=Saccharomyces cerevisiae (strain ATCC 204508 / S288c) GN=YBT1 PE=1 SV=2:706.057	-	KOG0054:Multidrug resistance-associated protein/mitoxantrone resistance protein, ABC superfamily	nucleoside-triphosphatase activity:GO:0017111;;ATP binding:GO:0005524;;integral to membrane:GO:0016021;;ATPase activity:GO:0016887;;transport:GO:0006810;;nucleotide binding:GO:0000166;;ATPase activity, coupled to transmembrane movement of substances:GO:0042626	01.04 phosphate metabolism	20.01.01.01.01 heavy metal ion transport (Cu+, Fe3+, etc.) S.cerevisiae	20.01.01.07.08 organic anion transport	20.01.03 C-compound and carbohydrate transport	20.01.13 lipid/fatty acid transport	20.01.25 vitamine/cofactor transport	20.01.27 drug/toxin transport	20.09.13 vacuolar/lysosomal transport	20.09.16 cellular export and secretion	32.07 detoxification	32.07.05 detoxification by export	16.01 protein binding	16.19 nucleotide/nucleoside/nucleobase binding	16.19.03 ATP binding	20.03 transport facilities	20.03.25 ABC transporters
gm1.856_g	gm1.856_g	gm1.856_g	scaffold_1:3097539-3099358	21.3898	3.98583	-2.42397	2.24e-07	yes	5300	IPR001411:Tetracycline resistance protein, TetB;;IPR007114:Major facilitator superfamily;;IPR011701:Major facilitator superfamily MFS-1;;IPR016196:MFS general substrate transporter	sp|Q10072|YAN6_SCHPO Uncharacterized transporter C3H1.06c OS=Schizosaccharomyces pombe (strain ATCC 38366 / 972) GN=SPAC3H1.06c PE=2 SV=1:236.113	-	KOG0254:Predicted transporter (major facilitator superfamily)	tetracycline:hydrogen antiporter activity:GO:0015520;;transporter activity:GO:0005215;;integral to membrane:GO:0016021;;transport:GO:0006810;;response to antibiotic:GO:0046677;;tetracycline transport:GO:0015904	20.01.27 drug/toxin transport	20.09.16 cellular export and secretion	20.09.16.01 Type I protein secretion system (ABC-type transport systems) B.subtilis	32.05.01 resistance proteins	32.07 detoxification	32.07.05 detoxification by export	20.03.25 ABC transporters
e_gw1.3.989.1	e_gw1.3.989.1	e_gw1.3.989.1	scaffold_3:1634560-1635766	243.963	45.3808	-2.42651	1.76e-11	yes	72869	IPR007568:RTA1 like protein	sp|C8ZI10|RSB1_YEAS8 Sphingoid long-chain base transporter RSB1 OS=Saccharomyces cerevisiae (strain Lalvin EC1118 / Prise de mousse) GN=RSB1 PE=2 SV=1:115.546	-	-	integral to membrane:GO:0016021;;response to stress:GO:0006950	20.01.13 lipid/fatty acid transport	20.03.22 transport ATPases
e_gw1.19.507.1	e_gw1.19.507.1	e_gw1.19.507.1	scaffold_19:581833-583219	44.1764	7.98361	-2.46816	1.11e-08	yes	86755	IPR007114:Major facilitator superfamily;;IPR011701:Major facilitator superfamily MFS-1;;IPR016196:MFS general substrate transporter	sp|P53918|ESBP6_YEAST Uncharacterized transporter ESBP6 OS=Saccharomyces cerevisiae (strain ATCC 204508 / S288c) GN=ESBP6 PE=1 SV=1:106.301	-	KOG2504:Monocarboxylate transporter	transporter activity:GO:0005215;;integral to membrane:GO:0016021;;transport:GO:0006810
estExt_Genewise1Plus.C_1_t30478	estExt_Genewise1Plus.C_1_t30478	estExt_Genewise1Plus.C_1_t30478	scaffold_1:1896074-1897958	65.4944	10.0903	-2.6984	7.21e-11	yes	94416	IPR007114:Major facilitator superfamily;;IPR011701:Major facilitator superfamily MFS-1;;IPR016196:MFS general substrate transporter	sp|P36035|JEN1_YEAST Carboxylic acid transporter protein homolog OS=Saccharomyces cerevisiae (strain ATCC 204508 / S288c) GN=JEN1 PE=1 SV=1:338.961	-	KOG0253:Synaptic vesicle transporter SV2 (major facilitator superfamily)	transporter activity:GO:0005215;;integral to membrane:GO:0016021;;transport:GO:0006810	01.05 C-compound and carbohydrate metabolism	20.01.03 C-compound and carbohydrate transport	20.01.03.03 C4-dicarboxylate transport (e.g. malate, succinate, fumarate) S.cerevisiae	20.03 transport facilities
estExt_Genewise1.C_7_t10106	estExt_Genewise1.C_7_t10106	estExt_Genewise1.C_7_t10106	scaffold_7:115889-120654	360.34	53.4323	-2.75357	7.7e-11	yes	109810	IPR003593:AAA+ ATPase, core;;IPR010929:CDR ABC transporter;;IPR013525:ABC-2 type transporter;;IPR003439:ABC transporter-like	sp|O74676|CDR4_CANAL ABC transporter CDR4 OS=Candida albicans GN=CDR4 PE=3 SV=1:1495.72	-	KOG0065:Pleiotropic drug resistance proteins (PDR1-15), ABC superfamily	nucleoside-triphosphatase activity:GO:0017111;;ATP binding:GO:0005524;;integral to membrane:GO:0016021;;transport:GO:0006810;;ATPase activity:GO:0016887;;ATPase activity, coupled to transmembrane movement of substances:GO:0042626;;nucleotide binding:GO:0000166	01.04 phosphate metabolism	01.05 C-compound and carbohydrate metabolism	20.01.01.01 cation transport (H+, Na+, K+, Ca2+ , NH4+, etc.) S.cerevisiae	20.01.03 C-compound and carbohydrate transport	20.01.13 lipid/fatty acid transport	20.01.27 drug/toxin transport	20.09.16.01 Type I protein secretion system (ABC-type transport systems) N.crassa	32.01.01 oxidative stress response	32.05.01.03 chemical agent resistance	32.07 detoxification	32.07.05 detoxification by export	34.01.01.01 homeostasis of metal ions (Na, K, Ca etc.) S.cerevisiae	16.19.03 ATP binding	20.03.22 transport ATPases	20.03.25 ABC transporters
estExt_Genewise1Plus.C_350119	estExt_Genewise1Plus.C_350119	estExt_Genewise1Plus.C_350119	scaffold_35:136377-137565	219.998	32.308	-2.76753	4.79e-13	yes	104620	IPR007274:Ctr copper transporter	sp|P38865|CTR2_YEAST Copper transport protein CTR2 OS=Saccharomyces cerevisiae (strain ATCC 204508 / S288c) GN=CTR2 PE=1 SV=1:100.138	-	KOG3386:Copper transporter	copper ion transport:GO:0006825;;integral to membrane:GO:0016021;;copper ion transmembrane transporter activity:GO:0005375	20.01.01.01.01 heavy metal ion transport (Cu+, Fe3+, etc.) N.crassa	20.09.18.07 non-vesicular cellular import	34.01.01.01 homeostasis of metal ions (Na, K, Ca etc.) N.crassa
estExt_Genemark1.C_130077	estExt_Genemark1.C_130077	estExt_Genemark1.C_130077	scaffold_13:269952-275208	132.96	19.3788	-2.77845	2.72e-14	yes	25505	IPR003593:AAA+ ATPase, core;;IPR011527:ABC transporter, transmembrane region, type 1;;IPR001140:ABC transporter, transmembrane region;;IPR003439:ABC transporter-like	sp|P32386|YBT1_YEAST ATP-dependent bile acid permease OS=Saccharomyces cerevisiae (strain ATCC 204508 / S288c) GN=YBT1 PE=1 SV=2:768.459	-	KOG0054:Multidrug resistance-associated protein/mitoxantrone resistance protein, ABC superfamily	nucleoside-triphosphatase activity:GO:0017111;;ATP binding:GO:0005524;;integral to membrane:GO:0016021;;ATPase activity:GO:0016887;;transport:GO:0006810;;nucleotide binding:GO:0000166;;ATPase activity, coupled to transmembrane movement of substances:GO:0042626	20.01.13 lipid/fatty acid transport	20.01.27 drug/toxin transport	20.09.16 cellular export and secretion	16.19.03 ATP binding	20.03.25 ABC transporters
estExt_fgenesh1_pm.C_170192	estExt_fgenesh1_pm.C_170192	estExt_fgenesh1_pm.C_170192	scaffold_17:697364-700374	34.976	5.00108	-2.80605	2.56e-12	yes	138334	IPR001902:Sulphate anion transporter;;IPR011547:Sulphate transporter;;IPR002645:Sulphate transporter/antisigma-factor antagonist STAS	sp|P23622|CYS14_NEUCR Sulfate permease 2 OS=Neurospora crassa GN=cys-14 PE=2 SV=3:795.808	-	KOG0236:Sulfate/bicarbonate/oxalate exchanger SAT-1 and related transporters (SLC26 family)	transporter activity:GO:0005215;;integral to membrane:GO:0016021;;sulfate transport:GO:0008272;;transport:GO:0006810;;membrane:GO:0016020;;secondary active sulfate transmembrane transporter activity:GO:0008271	01.01 amino acid metabolism	20.01.01.07.05 sulfate/sulfite transport	20.09.18 cellular import	20.09.18.07 non-vesicular cellular import	34.01.03.01 homeostasis of sulfate
fgenesh1_pg.2_#_496	fgenesh1_pg.2_#_496	fgenesh1_pg.2_#_496	scaffold_2:1930984-1932731	827.074	116.365	-2.82935	5.36e-11	yes	32968	IPR002293:Amino acid/polyamine transporter I;;IPR004841:Amino acid permease-associated region	sp|P19807|HNM1_YEAST Choline transport protein OS=Saccharomyces cerevisiae (strain ATCC 204508 / S288c) GN=HNM1 PE=1 SV=1:254.603	-	KOG1289:Amino acid transporters	amino acid transmembrane transporter activity:GO:0015171;;transport:GO:0006810;;membrane:GO:0016020;;amino acid transport:GO:0006865	20.01.03 C-compound and carbohydrate transport	20.01.07 amino acid/amino acid derivatives transport S.cerevisiae	20.01.11 amine / polyamine transport	20.01.26 neurotransmitter transport	20.09.18 cellular import	20.03 transport facilities
e_gw1.1.274.1	e_gw1.1.274.1	e_gw1.1.274.1	scaffold_1:3207446-3209486	21.6558	3.013	-2.84548	1.01e-08	yes	70134	IPR000873:AMP-dependent synthetase and ligase	sp|O42633|FAT1_COCHE Fatty acid transporter protein OS=Cochliobolus heterostrophus GN=FAT1 PE=3 SV=1:382.874	1.13.12.7:Photinus-luciferin 4-monooxygenase (ATP-hydrolysing).	KOG1179:Very long-chain acyl-CoA synthetase/fatty acid transporter	metabolic process:GO:0008152;;Photinus-luciferin 4-monooxygenase (ATP-hydrolyzing) activity:GO:0047077;;catalytic activity:GO:0003824	01.06 lipid, fatty acid and isoprenoid metabolism N.crassa	01.06.05 fatty acid metabolism	01.06.10 regulation of lipid, fatty acid and isoprenoid metabolism S.cerevisiae	02.25 oxidation of fatty acids	20.01.13 lipid/fatty acid transport	16.13.03 fatty acid binding (e.g. acyl-carrier protein)
estExt_Genewise1.C_330194	estExt_Genewise1.C_330194	estExt_Genewise1.C_330194	scaffold_33:212851-217715	169.549	23.5144	-2.85009	1.4e-14	yes	116127	IPR004827:Basic-leucine zipper (bZIP) transcription factor;;IPR003593:AAA+ ATPase, core;;IPR010929:CDR ABC transporter;;IPR013525:ABC-2 type transporter;;IPR003439:ABC transporter-like	sp|O74208|PDH1_CANGA ATP-binding cassette transporter CGR1 OS=Candida glabrata (strain ATCC 2001 / CBS 138 / JCM 3761 / NBRC 0622 / NRRL Y-65) GN=PDH1 PE=3 SV=3:1317.75	-	KOG0065:Pleiotropic drug resistance proteins (PDR1-15), ABC superfamily	regulation of transcription, DNA-dependent:GO:0006355;;nucleus:GO:0005634;;nucleoside-triphosphatase activity:GO:0017111;;integral to membrane:GO:0016021;;ATPase activity, coupled to transmembrane movement of substances:GO:0042626;;transcription factor activity:GO:0003700;;nucleotide binding:GO:0000166;;sequence-specific DNA binding:GO:0043565;;ATP binding:GO:0005524;;transport:GO:0006810;;ATPase…	01.04 phosphate metabolism	01.05 C-compound and carbohydrate metabolism	20.01.01.01 cation transport (H+, Na+, K+, Ca2+ , NH4+, etc.) S.cerevisiae	20.01.03 C-compound and carbohydrate transport	20.01.13 lipid/fatty acid transport	20.01.27 drug/toxin transport	20.09.16.01 Type I protein secretion system (ABC-type transport systems) N.crassa	32.01.01 oxidative stress response	32.05.01.03 chemical agent resistance	32.07 detoxification	32.07.05 detoxification by export	34.01.01.01 homeostasis of metal ions (Na, K, Ca etc.) S.cerevisiae	16.19.03 ATP binding	20.03.22 transport ATPases	20.03.25 ABC transporters
gm1.7789_g	gm1.7789_g	gm1.7789_g	scaffold_28:43918-45832	57.8433	7.72308	-2.9049	4.22e-13	yes	12233	IPR007114:Major facilitator superfamily;;IPR011701:Major facilitator superfamily MFS-1;;IPR016196:MFS general substrate transporter	sp|Q870L2|MIRB_EMENI Siderophore iron transporter mirB OS=Emericella nidulans GN=mirB PE=3 SV=1:696.427	-	KOG0254:Predicted transporter (major facilitator superfamily)	transporter activity:GO:0005215;;integral to membrane:GO:0016021;;transport:GO:0006810	20.01.01.01.01.01 siderophore-iron transport	20.09.18.07 non-vesicular cellular import	34.01.01.01 homeostasis of metal ions (Na, K, Ca etc.) N.crassa
fgenesh1_pm.7_#_236	fgenesh1_pm.7_#_236	fgenesh1_pm.7_#_236	scaffold_7:790332-792317	24.1833	2.97154	-3.02473	9.68e-11	yes	129563	IPR002293:Amino acid/polyamine transporter I;;IPR004841:Amino acid permease-associated region	sp|O74543|YCV4_SCHPO Uncharacterized amino-acid permease C777.04 OS=Schizosaccharomyces pombe (strain ATCC 38366 / 972) GN=SPCC777.04 PE=2 SV=1:322.398	-	KOG1286:Amino acid transporters	amino acid transmembrane transporter activity:GO:0015171;;transport:GO:0006810;;membrane:GO:0016020;;amino acid transport:GO:0006865	01.06 lipid, fatty acid and isoprenoid metabolism S.cerevisiae	20.01.07 amino acid/amino acid derivatives transport N.crassa	20.01.13 lipid/fatty acid transport	20.01.25 vitamine/cofactor transport	20.09.04 mitochondrial transport	20.09.18 cellular import	20.09.18.07 non-vesicular cellular import	32.01.03 osmotic and salt stress response	34.11.03.13 osmosensing	20.03 transport facilities
fgenesh1_pg.6_#_292	fgenesh1_pg.6_#_292	fgenesh1_pg.6_#_292	scaffold_6:1000456-1002169	37.1989	4.49438	-3.04906	2.32e-12	yes	34717	IPR007114:Major facilitator superfamily;;IPR011701:Major facilitator superfamily MFS-1;;IPR016196:MFS general substrate transporter	sp|O74923|YJ7D_SCHPO Uncharacterized transporter C757.13 OS=Schizosaccharomyces pombe (strain ATCC 38366 / 972) GN=SPCC757.13 PE=2 SV=1:244.202	-	KOG2533:Permease of the major facilitator superfamily	transporter activity:GO:0005215;;integral to membrane:GO:0016021;;transport:GO:0006810	20.01.23 allantoin and allantoate transport	20.09.18.07 non-vesicular cellular import
e_gw1.24.387.1	e_gw1.24.387.1	e_gw1.24.387.1	scaffold_24:385837-387113	12.1068	1.41127	-3.10076	1.89e-07	yes	88826	IPR004695:C4-dicarboxylate transporter/malic acid transport protein	sp|A3QUP1|SSU1_TRIRU Sulfite efflux pump SSU1 OS=Trichophyton rubrum GN=SSU1 PE=2 SV=1:347.436	-	-	integral to membrane:GO:0016021
e_gw1.9.136.1	e_gw1.9.136.1	e_gw1.9.136.1	scaffold_9:1061730-1063730	328.886	32.4137	-3.34291	0	yes	79984	IPR005828:General substrate transporter;;IPR007114:Major facilitator superfamily;;IPR003663:Sugar transporter;;IPR016196:MFS general substrate transporter	sp|P07921|LACP_KLULA Lactose permease OS=Kluyveromyces lactis (strain ATCC 8585 / CBS 2359 / DSM 70799 / NBRC 1267 / NRRL Y-1140 / WM37) GN=LAC12 PE=3 SV=1:297.745	5.3.1.4:L-arabinose isomerase.	KOG0254:Predicted transporter (major facilitator superfamily)	sugar:hydrogen symporter activity:GO:0005351;;L-arabinose isomerase activity:GO:0008733;;carbohydrate transport:GO:0008643;;transporter activity:GO:0005215;;integral to membrane:GO:0016021;;transport:GO:0006810;;membrane:GO:0016020	20.01.03 C-compound and carbohydrate transport	20.01.03.01 sugar transport	20.09.18 cellular import	20.09.18.07 non-vesicular cellular import
estExt_Genewise1Plus.C_5_t20500	estExt_Genewise1Plus.C_5_t20500	estExt_Genewise1Plus.C_5_t20500	scaffold_5:1330479-1332057	38.1858	2.7196	-3.81157	0	yes	97622	IPR011701:Major facilitator superfamily MFS-1;;IPR016196:MFS general substrate transporter	sp|P36032|MCH2_YEAST Probable transporter MCH2 OS=Saccharomyces cerevisiae (strain ATCC 204508 / S288c) GN=MCH2 PE=1 SV=1:77.7962	-	KOG2504:Monocarboxylate transporter	-	20.01.03 C-compound and carbohydrate transport	20.09.18 cellular import
e_gw1.2.353.1	e_gw1.2.353.1	e_gw1.2.353.1	scaffold_2:1885352-1887033	32.5344	1.54496	-4.39633	0	yes	71426	IPR007114:Major facilitator superfamily;;IPR011701:Major facilitator superfamily MFS-1;;IPR016196:MFS general substrate transporter	sp|Q9USN4|YJA1_SCHPO Uncharacterized transporter C1529.01 OS=Schizosaccharomyces pombe (strain ATCC 38366 / 972) GN=SPCC1529.01 PE=2 SV=2:146.747	-	KOG0255:Synaptic vesicle transporter SVOP and related transporters (major facilitator superfamily)	transporter activity:GO:0005215;;integral to membrane:GO:0016021;;transport:GO:0006810	20.01.27 drug/toxin transport	32.07 detoxification	20.03 transport facilities
e_gw1.7.1067.1	e_gw1.7.1067.1	e_gw1.7.1067.1	scaffold_7:960353-961978	323.965	9.71905	-5.05888	0	yes	77979	IPR001444:Flagellar basal body rod protein;;IPR007114:Major facilitator superfamily;;IPR011701:Major facilitator superfamily MFS-1;;IPR016196:MFS general substrate transporter	sp|Q9US37|YFZ4_SCHPO Uncharacterized transporter C1039.04 OS=Schizosaccharomyces pombe (strain ATCC 38366 / 972) GN=SPAC1039.04 PE=2 SV=1:528.48	-	KOG2533:Permease of the major facilitator superfamily	transporter activity:GO:0005215;;integral to membrane:GO:0016021;;transport:GO:0006810;;flagellin-based flagellum:GO:0009288;;ciliary or flagellar motility:GO:0001539;;structural molecule activity:GO:0005198;;motor activity:GO:0003774	20.01.03 C-compound and carbohydrate transport	20.01.23 allantoin and allantoate transport	20.01.25 vitamine/cofactor transport	20.09.18.07 non-vesicular cellular import	20.03 transport facilities
e_gw1.1.484.1	e_gw1.1.484.1	e_gw1.1.484.1	scaffold_1:2533205-2533889	1991.94	28.8581	-6.10906	0	yes	70056	IPR007274:Ctr copper transporter	sp|O94722|CTR4_SCHPO Copper transport protein ctr4 OS=Schizosaccharomyces pombe (strain ATCC 38366 / 972) GN=ctr4 PE=1 SV=1:125.946	-	KOG3386:Copper transporter	copper ion transport:GO:0006825;;integral to membrane:GO:0016021;;copper ion transmembrane transporter activity:GO:0005375	20.01.01.01.01 heavy metal ion transport (Cu+, Fe3+, etc.) N.crassa	20.09.18 cellular import	34.01.01.01 homeostasis of metal ions (Na, K, Ca etc.) N.crassa
estExt_fgenesh1_pm.C_300010	estExt_fgenesh1_pm.C_300010	estExt_fgenesh1_pm.C_300010	scaffold_30:25666-26620	1929.91	4.57772	-8.71969	0	yes	139174	IPR007274:Ctr copper transporter	sp|O94722|CTR4_SCHPO Copper transport protein ctr4 OS=Schizosaccharomyces pombe (strain ATCC 38366 / 972) GN=ctr4 PE=1 SV=1:101.679	-	KOG3386:Copper transporter	copper ion transport:GO:0006825;;integral to membrane:GO:0016021;;copper ion transmembrane transporter activity:GO:0005375
a The genes with red colors were putative MFS transporters up-regulated in the parental strain Rut-C30 under lignocellulose condtion relative to glucose condition.
b The genes with yellow background colors were putative MFS transporters also found in the gene set down-regulated in X11 compared to the parental strain Rut-C30 under lignocellulose condition.
